# Supplementary material
Source: HighWire-hosted journal article supplement (https://ard.bmj.com/content/83/2/253)
Supplement: inline-supplementary-material-2 [file inline-supplementary-material-2.xlsx]

## Sheet: Supplemental Table 2 The percen
Gene Symbol	Percentage of Exnoic Sites Included
AADAC	1
AADACL3	1
AADACL4	1
AAGAB	1
AAMDC	1
AAR2	1
AARSD1	1
ABAT	1
ABCB5	1
ABCC12	1
ABCF2	1
ABCF2-H2BE1	1
ABCG2	1
ABHD1	1
ABHD13	1
ABHD14B	1
ABHD4	1
ABLIM3	1
ABRA	1
ABRACL	1
ABRAXAS2	1
ABT1	1
ACADM	1
ACAT2	1
ACCS	1
ACER1	1
ACKR1	1
ACKR2	1
ACKR3	1
ACKR4	1
ACMSD	1
ACO1	1
ACOT13	1
ACOT8	1
ACOX1	1
ACOX2	1
ACP2	1
ACP5	1
ACRBP	1
ACRV1	1
ACSBG2	1
ACSM2A	1
ACSM2B	1
ACSM3	1
ACSM6	1
ACTG1	1
ACTL7A	1
ACTR8	1
ACTRT2	1
ACTRT3	1
ACVR1	1
ACYP1	1
ADAD1	1
ADAL	1
ADAM20	1
ADAM21	1
ADAM30	1
ADAT1	1
ADCY10	1
ADCYAP1R1	1
ADGRF4	1
ADGRG5	1
ADIG	1
ADIPOQ	1
ADIPOR2	1
ADIRF	1
ADORA1	1
ADORA2A	1
ADORA3	1
ADPRH	1
ADPRM	1
ADRB2	1
ADTRP	1
AEN	1
AFF4	1
AGA	1
AGBL1	1
AGBL4	1
AGER	1
AGO1	1
AGPAT1	1
AGPAT3	1
AGPAT4	1
AGR2	1
AGRP	1
AGT	1
AGTR2	1
AGTRAP	1
AGXT2	1
AHSA1	1
AHSG	1
AHSP	1
AIF1	1
AIM2	1
AIP	1
AK1	1
AKAIN1	1
AKAP14	1
AKAP3	1
AKAP5	1
AKAP7	1
AKNAD1	1
AKR1A1	1
AKR1B10	1
AKR1B15	1
AKT2	1
ALB	1
ALCAM	1
ALDH1A1	1
ALDH1B1	1
ALDH1L1	1
ALDH3A2	1
ALDH3B2	1
ALDH6A1	1
ALDH9A1	1
ALDOC	1
ALG10	1
ALG10B	1
ALG12	1
ALG14	1
ALG9	1
ALKBH1	1
ALKBH3	1
ALKBH8	1
ALLC	1
ALOX12B	1
ALOX5AP	1
AMIGO1	1
AMIGO2	1
AMN1	1
AMOT	1
AMOTL1	1
AMPD1	1
AMPD2	1
AMTN	1
ANAPC13	1
ANAPC15	1
ANAPC16	1
ANG	1
ANGPT2	1
ANGPT4	1
ANKH	1
ANKMY2	1
ANKRA2	1
ANKRD34B	1
ANKRD34C	1
ANKRD37	1
ANKRD45	1
ANKRD55	1
ANP32A	1
ANP32D	1
ANXA13	1
ANXA2R	1
ANXA3	1
ANXA4	1
ANXA5	1
ANXA6	1
ANXA9	1
AOAH	1
AP1S1	1
AP2S1	1
AP3M1	1
AP3M2	1
AP3S2	1
APBB3	1
APCS	1
APEX1	1
APEX2	1
APH1A	1
APOA2	1
APOBEC3C	1
APOBEC3F	1
APOBEC4	1
APOC3	1
APOC4	1
APOD	1
APOH	1
APOL1	1
APOL2	1
APOM	1
APPBP2	1
AQP3	1
AQP4	1
AQP8	1
AQP9	1
ARCN1	1
AREL1	1
ARF1	1
ARF6	1
ARFIP2	1
ARFRP1	1
ARG1	1
ARG2	1
ARHGAP11B	1
ARHGAP19	1
ARHGAP24	1
ARHGAP26	1
ARHGAP28	1
ARHGAP35	1
ARHGDIB	1
ARHGEF3	1
ARHGEF6	1
ARHGEF9	1
ARID5B	1
ARL11	1
ARL13A	1
ARL14	1
ARL2	1
ARL5B	1
ARL5C	1
ARL6	1
ARL6IP5	1
ARL9	1
ARMC9	1
ARMCX5	1
ARMCX6	1
ARMS2	1
ARNTL	1
ARPC2	1
ARPC5	1
ARR3	1
ARRDC5	1
ARSF	1
ASB15	1
ASB3	1
ASB5	1
ASB8	1
ASCC2	1
ASCL3	1
ASGR2	1
ASNSD1	1
ASPHD2	1
ASRGL1	1
ASTE1	1
ATG10	1
ATG101	1
ATG4B	1
ATG7	1
ATG9A	1
ATL1	1
ATOX1	1
ATP13A5	1
ATP1A1	1
ATP1B4	1
ATP2A1	1
ATP5F1B	1
ATP5F1E	1
ATP5MC2	1
ATP5MC3	1
ATP5MG	1
ATP5MJ	1
ATP5PF	1
ATP6V0D1	1
ATP6V1B1	1
ATP6V1C2	1
ATP6V1D	1
ATP6V1E2	1
ATP6V1G2	1
ATP8B2	1
ATPAF2	1
ATRAID	1
ATXN1L	1
ATXN3L	1
ATXN7L3	1
ATXN7L3B	1
AURKB	1
AVIL	1
AVL9	1
AZIN1	1
AZIN2	1
B2M	1
B3GALNT1	1
B3GALT1	1
B3GALT2	1
B3GALT5	1
B3GNT5	1
B4GALT3	1
B4GALT4	1
B4GALT6	1
B9D2	1
BABAM1	1
BACH1	1
BACH2	1
BANF2	1
BATF2	1
BBOF1	1
BBS12	1
BBS4	1
BBX	1
BCCIP	1
BCHE	1
BCL2A1	1
BCL2L11	1
BCL2L15	1
BCL2L2	1
BCL6B	1
BCL7A	1
BCO1	1
BCO2	1
BCS1L	1
BDKRB1	1
BDNF	1
BECN1	1
BEND3	1
BEND6	1
BEND7	1
BEX1	1
BEX3	1
BEX4	1
BEX5	1
BFAR	1
BGLAP	1
BHLHE40	1
BIN3	1
BLID	1
BMERB1	1
BMP15	1
BMP5	1
BMPER	1
BNIP3L	1
BOLA1	1
BOLA2	1
BOLA2B	1
BORCS7	1
BORCS8	1
BPGM	1
BPI	1
BPIFA1	1
BPIFA2	1
BPIFA3	1
BPIFB2	1
BPNT1	1
BRF2	1
BRK1	1
BRMS1	1
BSCL2	1
BSND	1
BSPH1	1
BST2	1
BTBD18	1
BTG1	1
BTG2	1
BTK	1
BTN1A1	1
BVES	1
BYSL	1
C10orf120	1
C10orf53	1
C10orf62	1
C10orf82	1
C10orf90	1
C10orf99	1
C11orf1	1
C11orf21	1
C11orf24	1
C11orf42	1
C11orf49	1
C11orf52	1
C11orf58	1
C11orf65	1
C11orf68	1
C11orf86	1
C11orf94	1
C12orf42	1
C12orf54	1
C12orf57	1
C12orf60	1
C12orf71	1
C12orf73	1
C14orf28	1
C16orf74	1
C16orf92	1
C17orf64	1
C17orf67	1
C17orf78	1
C17orf98	1
C18orf25	1
C18orf32	1
C19orf44	1
C19orf48	1
C1GALT1C1	1
C1orf100	1
C1orf105	1
C1orf112	1
C1orf116	1
C1orf158	1
C1orf162	1
C1orf189	1
C1orf21	1
C1orf210	1
C1orf216	1
C1orf43	1
C1orf52	1
C1orf54	1
C1orf68	1
C1orf87	1
C1orf94	1
C1QA	1
C1QTNF3	1
C1QTNF6	1
C1QTNF7	1
C1QTNF9B	1
C1RL	1
C2	1
C20orf141	1
C20orf202	1
C20orf27	1
C20orf85	1
C21orf140	1
C21orf62	1
C22orf15	1
C22orf23	1
C2orf15	1
C2orf16	1
C2orf66	1
C2orf80	1
C2orf88	1
C3AR1	1
C3orf18	1
C3orf22	1
C3orf33	1
C3orf62	1
C4BPB	1
C4orf19	1
C4orf33	1
C4orf36	1
C4orf45	1
C4orf51	1
C5AR1	1
C5orf24	1
C5orf46	1
C5orf52	1
C6	1
C6orf15	1
C6orf201	1
C6orf226	1
C6orf47	1
C6orf52	1
C6orf62	1
C7orf25	1
C7orf33	1
C7orf57	1
C7orf61	1
C8A	1
C8orf48	1
C8orf58	1
C8orf86	1
C9orf129	1
C9orf135	1
C9orf153	1
C9orf64	1
C9orf92	1
CA10	1
CA13	1
CA14	1
CA3	1
CA5B	1
CABS1	1
CACNA1S	1
CACNG7	1
CALB2	1
CALCA	1
CALCB	1
CALCOCO1	1
CALHM2	1
CALM1	1
CALML4	1
CALML6	1
CALR3	1
CAMK1	1
CAMK1G	1
CAMK2A	1
CAMKK1	1
CANX	1
CAPG	1
CAPN1	1
CAPNS2	1
CAPSL	1
CARD16	1
CARD17	1
CARHSP1	1
CARS1	1
CARTPT	1
CASP14	1
CASP2	1
CASP4	1
CASP6	1
CASQ1	1
CAT	1
CATSPER3	1
CAV1	1
CAV2	1
CAV3	1
CAVIN2	1
CBLIF	1
CBLL2	1
CBLN3	1
CBY1	1
CC2D1B	1
CCDC117	1
CCDC121	1
CCDC126	1
CCDC127	1
CCDC13	1
CCDC134	1
CCDC153	1
CCDC167	1
CCDC172	1
CCDC182	1
CCDC190	1
CCDC28B	1
CCDC32	1
CCDC51	1
CCDC54	1
CCDC69	1
CCDC70	1
CCDC71	1
CCDC80	1
CCDC82	1
CCDC86	1
CCDC89	1
CCDC93	1
CCIN	1
CCKAR	1
CCL1	1
CCL13	1
CCL14	1
CCL15	1
CCL17	1
CCL18	1
CCL19	1
CCL2	1
CCL21	1
CCL22	1
CCL23	1
CCL24	1
CCL27	1
CCL28	1
CCL5	1
CCL7	1
CCL8	1
CCN4	1
CCN6	1
CCND1	1
CCNI	1
CCNJ	1
CCNY	1
CCR1	1
CCR2	1
CCR4	1
CCR5	1
CCR7	1
CCR8	1
CCR9	1
CCS	1
CCT3	1
CCT8L2	1
CD14	1
CD177	1
CD1A	1
CD1B	1
CD1C	1
CD1E	1
CD244	1
CD247	1
CD27	1
CD274	1
CD276	1
CD28	1
CD300A	1
CD300E	1
CD300LD	1
CD37	1
CD38	1
CD3D	1
CD3E	1
CD3G	1
CD4	1
CD48	1
CD52	1
CD53	1
CD59	1
CD5L	1
CD63	1
CD68	1
CD72	1
CD74	1
CD79B	1
CD80	1
CD82	1
CD84	1
CD86	1
CD9	1
CD96	1
CDA	1
CDC20B	1
CDC23	1
CDC25C	1
CDC42EP2	1
CDC42SE1	1
CDC42SE2	1
CDC6	1
CDCA4	1
CDCA7L	1
CDCA8	1
CDCP2	1
CDH11	1
CDH6	1
CDH8	1
CDHR4	1
CDIN1	1
CDIPT	1
CDK10	1
CDK14	1
CDK18	1
CDK2	1
CDK20	1
CDK3	1
CDK4	1
CDK5	1
CDK9	1
CDKL4	1
CDKN1A	1
CDKN2C	1
CDKN3	1
CDO1	1
CDPF1	1
CDR1	1
CDR2	1
CDRT1	1
CDS2	1
CEACAM21	1
CEACAM3	1
CEACAM4	1
CEACAM6	1
CEACAM7	1
CEACAM8	1
CEBPG	1
CELA1	1
CEMP1	1
CENATAC	1
CENPBD1P	1
CENPL	1
CENPM	1
CENPW	1
CEP19	1
CEP295NL	1
CEP55	1
CEP68	1
CEP89	1
CEP97	1
CERS3	1
CETN2	1
CETP	1
CFAP126	1
CFAP157	1
CFAP20	1
CFAP20DC	1
CFAP418	1
CFAP45	1
CFAP57	1
CFAP61	1
CFAP92	1
CFAP97D1	1
CGA	1
CGGBP1	1
CGRRF1	1
CH25H	1
CHAMP1	1
CHCHD4	1
CHCHD5	1
CHCHD7	1
CHI3L1	1
CHIC2	1
CHML	1
CHMP1A	1
CHMP2A	1
CHMP4A	1
CHRAC1	1
CHRDL2	1
CHRM1	1
CHRM2	1
CHRM3	1
CHRM5	1
CHRNA1	1
CHRNA2	1
CHRNB3	1
CHRNG	1
CHST11	1
CHST4	1
CHTF8	1
CHTOP	1
CHURC1	1
CIAO2A	1
CIART	1
CIB3	1
CIBAR2	1
CIDEA	1
CIDEB	1
CINP	1
CIPC	1
CIRBP	1
CISD1	1
CITED1	1
CKMT1A	1
CKMT2	1
CLC	1
CLCA2	1
CLCN5	1
CLCN6	1
CLDN1	1
CLDN10	1
CLDN11	1
CLDN12	1
CLDN17	1
CLDN18	1
CLDN2	1
CLDN20	1
CLDN22	1
CLDN6	1
CLDN7	1
CLDN8	1
CLDND1	1
CLEC10A	1
CLEC1A	1
CLEC3A	1
CLEC4A	1
CLEC4C	1
CLEC4D	1
CLEC4E	1
CLEC4F	1
CLEC9A	1
CLECL1	1
CLIC2	1
CLINT1	1
CLK3	1
CLN8	1
CLP1	1
CLPS	1
CLPSL1	1
CLPTM1L	1
CLPX	1
CLU	1
CLUAP1	1
CLUL1	1
CLVS1	1
CMA1	1
CMBL	1
CMC4	1
CMKLR1	1
CMTM5	1
CMTM8	1
CMTR2	1
CNBD2	1
CNBP	1
CNDP1	1
CNIH1	1
CNIH3	1
CNIH4	1
CNKSR3	1
CNN1	1
CNN3	1
CNOT6	1
CNOT8	1
CNPY2	1
CNPY4	1
CNR2	1
CNTD1	1
CNTF	1
CNTN4	1
COA1	1
COA3	1
COA4	1
COG4	1
COG7	1
COLCA2	1
COLEC10	1
COMMD2	1
COMMD3	1
COMMD9	1
COPS4	1
COPS7A	1
COPS7B	1
COPZ1	1
COQ5	1
CORO1A	1
CORO2A	1
COX14	1
COX15	1
COX19	1
COX4I1	1
COX6A1	1
COX6B1	1
COX6C	1
COX7A2L	1
COX7B2	1
CPA3	1
CPA4	1
CPA5	1
CPA6	1
CPB1	1
CPEB4	1
CPLX2	1
CPLX3	1
CPLX4	1
CPNE2	1
CPO	1
CPPED1	1
CPS1	1
CPSF4L	1
CPT1B	1
CPVL	1
CPXCR1	1
CRABP2	1
CRBN	1
CREBL2	1
CREM	1
CRIP3	1
CRISP2	1
CRISPLD2	1
CRKL	1
CRNN	1
CRYAA	1
CRYBA1	1
CRYBA4	1
CRYBB2	1
CRYBB3	1
CRYGA	1
CRYGB	1
CRYGC	1
CRYZ	1
CSDC2	1
CSF1	1
CSHL1	1
CSKMT	1
CSNK1A1L	1
CSNK1G1	1
CSNK2B	1
CSRNP1	1
CSRNP2	1
CSRNP3	1
CST1	1
CST11	1
CST2	1
CST4	1
CST5	1
CST7	1
CST8	1
CST9	1
CST9L	1
CSTA	1
CSTF2	1
CSTF2T	1
CSTL1	1
CT83	1
CTDSP2	1
CTH	1
CTLA4	1
CTNNBIP1	1
CTNND1	1
CTRB1	1
CTRB2	1
CTRL	1
CTSB	1
CTSC	1
CTSK	1
CTSL	1
CTSS	1
CTSV	1
CTSW	1
CTXN2	1
CTXN3	1
CUEDC2	1
CUZD1	1
CWC25	1
CX3CL1	1
CXCL11	1
CXCL13	1
CXCL16	1
CXCL8	1
CXCR1	1
CXCR2	1
CXCR3	1
CXCR4	1
CXCR5	1
CXCR6	1
CXXC1	1
CYB561A3	1
CYB561D1	1
CYB561D2	1
CYB5A	1
CYB5B	1
CYB5D1	1
CYB5R1	1
CYB5R2	1
CYBRD1	1
CYGB	1
CYLC2	1
CYP11B1	1
CYP11B2	1
CYP17A1	1
CYP19A1	1
CYP1A1	1
CYP1A2	1
CYP27C1	1
CYP2A6	1
CYP2J2	1
CYP4A11	1
CYP4A22	1
CYP4B1	1
CYP4F2	1
CYP4X1	1
CYP4Z1	1
CYP8B1	1
CYS1	1
CYSLTR1	1
CYSLTR2	1
CYTH4	1
CYTIP	1
DAB1	1
DAD1	1
DAGLB	1
DAND5	1
DAO	1
DAOA	1
DAP3	1
DAPL1	1
DAW1	1
DAZAP2	1
DCAF11	1
DCAF16	1
DCAF4L1	1
DCAF4L2	1
DCAF8L1	1
DCANP1	1
DCD	1
DCDC1	1
DCDC2B	1
DCLK3	1
DCLRE1C	1
DCP2	1
DCSTAMP	1
DCTD	1
DCTN3	1
DCTN6	1
DCUN1D5	1
DCX	1
DDA1	1
DDHD2	1
DDI1	1
DDT	1
DDTL	1
DDX1	1
DDX19A	1
DDX41	1
DDX42	1
DDX47	1
DDX59	1
DEDD	1
DEFA4	1
DEFA5	1
DEFA6	1
DEFB1	1
DEFB103A	1
DEFB103B	1
DEFB104A	1
DEFB104B	1
DEFB105A	1
DEFB106A	1
DEFB106B	1
DEFB107A	1
DEFB107B	1
DEFB110	1
DEFB112	1
DEFB114	1
DEFB115	1
DEFB116	1
DEFB118	1
DEFB119	1
DEFB121	1
DEFB123	1
DEFB125	1
DEFB127	1
DEFB128	1
DEFB134	1
DEFB136	1
DEFB4A	1
DEPP1	1
DERL1	1
DESI1	1
DFFA	1
DGKA	1
DHDDS	1
DHFR2	1
DHRS1	1
DHRS2	1
DHRS7	1
DHRS7B	1
DHRS7C	1
DHRS9	1
DHX15	1
DHX40	1
DHX58	1
DHX8	1
DIABLO	1
DIO3	1
DIRAS2	1
DIRAS3	1
DKK1	1
DKK2	1
DKKL1	1
DLC1	1
DLG4	1
DLX1	1
DLX5	1
DMAC2L	1
DMBX1	1
DMP1	1
DMRTC1	1
DMTN	1
DNAAF10	1
DNAAF6	1
DNAI1	1
DNAJB11	1
DNAJB13	1
DNAJB2	1
DNAJB8	1
DNAJC11	1
DNAJC12	1
DNAJC15	1
DNAJC17	1
DNAJC24	1
DNAJC27	1
DNAJC28	1
DNAJC3	1
DNAJC5	1
DNAJC5B	1
DNAJC5G	1
DNALI1	1
DNASE1	1
DNASE1L1	1
DNASE1L3	1
DNASE2B	1
DNMT3B	1
DNPEP	1
DNTT	1
DOK4	1
DOK5	1
DPAGT1	1
DPCD	1
DPEP1	1
DPH2	1
DPH3	1
DPH5	1
DPM3	1
DPPA5	1
DPT	1
DPYSL2	1
DR1	1
DRAM2	1
DRC3	1
DRD1	1
DRG2	1
DRGX	1
DTL	1
DTNBP1	1
DUS2	1
DUS4L	1
DUSP10	1
DUSP14	1
DUSP18	1
DUSP19	1
DUSP21	1
DUSP22	1
DUSP26	1
DYDC1	1
DYNLL2	1
DYNLRB1	1
DYNLRB2	1
DYNLT2B	1
DYNLT5	1
DYRK4	1
DYTN	1
EAF1	1
EBAG9	1
EBNA1BP2	1
ECI2	1
ECSIT	1
ECT2L	1
EDA2R	1
EDC3	1
EDDM3A	1
EDDM3B	1
EDIL3	1
EDN1	1
EDN2	1
EDNRA	1
EEF1AKMT1	1
EEF1AKMT4	1
EEF2K	1
EFCAB12	1
EFEMP1	1
EFEMP2	1
EFNA1	1
EFNA5	1
EFNB1	1
EFNB2	1
EGF	1
EGFL6	1
EID1	1
EID3	1
EIF1	1
EIF1AD	1
EIF1B	1
EIF2B2	1
EIF2B5	1
EIF2D	1
EIF2S1	1
EIF3C	1
EIF3D	1
EIF3H	1
EIF3I	1
EIF3K	1
EIF3M	1
EIF4E2	1
EIF4EBP3	1
EIF5A	1
EIF5A2	1
EIF5AL1	1
EIF6	1
EIPR1	1
ELAC1	1
ELAVL1	1
ELAVL2	1
ELF1	1
ELF3	1
ELF4	1
ELF5	1
ELL3	1
ELOF1	1
ELOVL3	1
ELOVL6	1
ELP3	1
ELSPBP1	1
EMC2	1
EMC4	1
EME1	1
EMP1	1
EMP3	1
ENC1	1
ENHO	1
ENO2	1
ENO3	1
ENOX1	1
ENOX2	1
ENPP6	1
ENTHD1	1
ENTPD7	1
ENY2	1
EOLA1	1
EOLA2	1
EPC2	1
EPHB1	1
EPHB2	1
EPPIN	1
EPPIN-WFDC6	1
EPX	1
ERAL1	1
ERCC1	1
ERCC6L	1
ERG28	1
ERGIC3	1
ERLIN1	1
ERMN	1
ERP27	1
ERVFRD-1	1
ESAM	1
ESM1	1
ETFB	1
ETFBKMT	1
ETFDH	1
ETS2	1
EVA1A	1
EVI2B	1
EVI5	1
EXO5	1
EXOC2	1
EXOC7	1
EXOSC1	1
EXOSC2	1
EXOSC5	1
EXOSC7	1
EXPH5	1
EXTL3	1
EYA2	1
EYA3	1
EYA4	1
EZH1	1
EZR	1
F11	1
F2RL2	1
FABP1	1
FABP12	1
FABP3	1
FABP4	1
FABP6	1
FABP7	1
FAF2	1
FAM102B	1
FAM107B	1
FAM114A2	1
FAM118A	1
FAM118B	1
FAM126A	1
FAM126B	1
FAM135B	1
FAM156A	1
FAM156B	1
FAM162A	1
FAM163A	1
FAM166A	1
FAM166C	1
FAM168A	1
FAM168B	1
FAM169A	1
FAM169B	1
FAM170A	1
FAM172A	1
FAM180A	1
FAM181A	1
FAM183A	1
FAM189A2	1
FAM200B	1
FAM209A	1
FAM20B	1
FAM210A	1
FAM216B	1
FAM217B	1
FAM220A	1
FAM221B	1
FAM229B	1
FAM234A	1
FAM241B	1
FAM24A	1
FAM24B	1
FAM32A	1
FAM3D	1
FAM47A	1
FAM47B	1
FAM47C	1
FAM53C	1
FAM71A	1
FAM71C	1
FAM71F2	1
FAM78B	1
FAM81A	1
FANCD2OS	1
FANCF	1
FASTKD3	1
FASTKD5	1
FAU	1
FBL	1
FBXL20	1
FBXL4	1
FBXO30	1
FBXO32	1
FBXO34	1
FBXO39	1
FBXO40	1
FBXO42	1
FBXO47	1
FBXO48	1
FBXO6	1
FBXO8	1
FBXW12	1
FCER1A	1
FCER1G	1
FCGR2A	1
FCGR3A	1
FCHSD1	1
FCN1	1
FCN2	1
FCN3	1
FCRL1	1
FCRL2	1
FCRL6	1
FDFT1	1
FDXACB1	1
FEM1B	1
FEM1C	1
FERMT2	1
FEZ1	1
FFAR2	1
FFAR3	1
FGF1	1
FGF10	1
FGF5	1
FGF9	1
FGFBP1	1
FGGY	1
FGL2	1
FHIP1A	1
FHIT	1
FHL2	1
FHL3	1
FIBIN	1
FIGN	1
FIGNL1	1
FITM2	1
FKBP14	1
FKBP2	1
FKBP5	1
FKBPL	1
FLACC1	1
FLAD1	1
FLCN	1
FLOT2	1
FLRT2	1
FLRT3	1
FMO3	1
FMO4	1
FMO5	1
FMOD	1
FMR1NB	1
FNDC7	1
FNDC8	1
FNDC9	1
FOLR1	1
FOXJ2	1
FOXN3	1
FOXO4	1
FOXP1	1
FOXR2	1
FOXRED1	1
FPR2	1
FPR3	1
FRMD4B	1
FRMPD1	1
FSBP	1
FSCN3	1
FSHB	1
FTHL17	1
FTL	1
FTSJ3	1
FUT10	1
FUT2	1
FUT3	1
FUT6	1
FUT8	1
FUT9	1
FXYD1	1
FXYD2	1
FXYD4	1
FXYD5	1
FXYD6	1
FYN	1
FYTTD1	1
FZD3	1
FZD6	1
G6PC1	1
G6PC3	1
GABARAPL2	1
GABPB2	1
GABRB2	1
GABRR1	1
GABRR2	1
GADL1	1
GAL3ST4	1
GALK2	1
GALNT13	1
GALNT14	1
GALNT15	1
GALNT5	1
GALNTL5	1
GALNTL6	1
GALP	1
GALT	1
GART	1
GAS2	1
GAST	1
GBA	1
GBP5	1
GCC1	1
GCG	1
GCHFR	1
GCM2	1
GCNT1	1
GCNT2	1
GDA	1
GDF3	1
GDI1	1
GDPD5	1
GDPGP1	1
GEM	1
GEMIN6	1
GEMIN7	1
GET1	1
GFI1B	1
GFM1	1
GFRA1	1
GFUS	1
GGNBP2	1
GGPS1	1
GH1	1
GH2	1
GHRH	1
GHRHR	1
GHRL	1
GIMAP5	1
GIMAP8	1
GINS4	1
GJA1	1
GJA10	1
GJA4	1
GJA5	1
GJA8	1
GJA9	1
GJB1	1
GJB2	1
GJB3	1
GJB4	1
GJB5	1
GJB6	1
GJB7	1
GJC1	1
GK2	1
GKN1	1
GKN2	1
GLB1L	1
GLCE	1
GLMP	1
GLOD4	1
GLRA1	1
GLT8D1	1
GLYAT	1
GLYATL1	1
GLYATL2	1
GM2A	1
GMEB1	1
GMFG	1
GML	1
GMNC	1
GMPR	1
GMPR2	1
GNA14	1
GNAO1	1
GNB1	1
GNB3	1
GNB4	1
GNG11	1
GNG12	1
GNG13	1
GNG2	1
GNG3	1
GNG4	1
GNG7	1
GNG8	1
GNGT2	1
GNL2	1
GNLY	1
GNPDA1	1
GNRH2	1
GOLGA7	1
GOLPH3L	1
GOLT1A	1
GON7	1
GOT1	1
GOT1L1	1
GP2	1
GPAM	1
GPANK1	1
GPATCH11	1
GPATCH2	1
GPBP1	1
GPBP1L1	1
GPD1	1
GPHA2	1
GPN1	1
GPNMB	1
GPR101	1
GPR119	1
GPR12	1
GPR139	1
GPR141	1
GPR148	1
GPR151	1
GPR17	1
GPR173	1
GPR174	1
GPR18	1
GPR182	1
GPR183	1
GPR19	1
GPR3	1
GPR32	1
GPR34	1
GPR37L1	1
GPR52	1
GPR55	1
GPR61	1
GPR63	1
GPR65	1
GPR75	1
GPR85	1
GPRASP1	1
GPRASP2	1
GPRC5C	1
GPRIN3	1
GPS2	1
GPX2	1
GPX5	1
GPX6	1
GRAP2	1
GRB10	1
GREM1	1
GREM2	1
GRHL1	1
GRHL2	1
GRHPR	1
GRID2	1
GRIK3	1
GRK4	1
GRM2	1
GRN	1
GRPR	1
GRXCR1	1
GRXCR2	1
GSDMC	1
GSS	1
GSTA4	1
GSTK1	1
GSTM3	1
GSTO2	1
GSTZ1	1
GTF2A1	1
GTF2B	1
GTF2E1	1
GTF3C6	1
GTPBP4	1
GTSF1	1
GTSF1L	1
GUCA1A	1
GUCA1B	1
GUCA1C	1
GUCA2A	1
GUCA2B	1
GUCY1B1	1
GYPB	1
GYPE	1
GZMA	1
GZMK	1
H1-0	1
H1-1	1
H1-2	1
H1-3	1
H1-5	1
H1-6	1
H2AC1	1
H2AC11	1
H2AC12	1
H2AC13	1
H2AC14	1
H2AC15	1
H2AC16	1
H2AC17	1
H2AC18	1
H2AC19	1
H2AC20	1
H2AC21	1
H2AC4	1
H2AC6	1
H2AC7	1
H2AC8	1
H2AJ	1
H2AP	1
H2BC1	1
H2BC10	1
H2BC11	1
H2BC12	1
H2BC13	1
H2BC14	1
H2BC15	1
H2BC17	1
H2BC21	1
H2BC3	1
H2BC4	1
H2BC5	1
H2BC6	1
H2BC7	1
H2BC8	1
H2BC9	1
H2BU1	1
H2BW1	1
H2BW2	1
H3-3B	1
H3-5	1
H3C1	1
H3C10	1
H3C12	1
H3C2	1
H3C3	1
H3C4	1
H3C6	1
H3C7	1
H3C8	1
H4-16	1
H4C1	1
H4C11	1
H4C12	1
H4C13	1
H4C14	1
H4C15	1
H4C2	1
H4C3	1
H4C4	1
H4C5	1
H4C6	1
H4C7	1
H4C8	1
H4C9	1
HAAO	1
HACL1	1
HADH	1
HAMP	1
HAO1	1
HAO2	1
HAPLN1	1
HARS1	1
HARS2	1
HAS2	1
HAT1	1
HAUS4	1
HAUS8	1
HAVCR2	1
HAX1	1
HBB	1
HBD	1
HBE1	1
HBEGF	1
HBG2	1
HCAR2	1
HCAR3	1
HCCS	1
HCLS1	1
HCRTR1	1
HDAC6	1
HDC	1
HDGF	1
HEATR9	1
HEBP1	1
HEMGN	1
HEMK1	1
HENMT1	1
HEPN1	1
HERPUD2	1
HEXA	1
HFE	1
HGF	1
HHIPL2	1
HIGD1B	1
HIGD1C	1
HILPDA	1
HINFP	1
HIPK1	1
HJURP	1
HK1	1
HLA-DMA	1
HLA-DOA	1
HLA-DOB	1
HLA-DPA1	1
HLA-DQB2	1
HLA-DRA	1
HMBS	1
HMGB4	1
HMGCL	1
HMGCR	1
HMGCS2	1
HMGN3	1
HMGN4	1
HMHB1	1
HMOX2	1
HNMT	1
HNRNPCL1	1
HNRNPH2	1
HOMER1	1
HOXA1	1
HOXB13	1
HP	1
HPCA	1
HPCAL1	1
HPCAL4	1
HPD	1
HPGD	1
HPGDS	1
HPR	1
HPS1	1
HPS4	1
HPS5	1
HRH1	1
HRH2	1
HS3ST5	1
HSD11B1	1
HSD17B10	1
HSD17B2	1
HSD17B3	1
HSD17B6	1
HSD17B7	1
HSD3B1	1
HSD3B2	1
HSFX1	1
HSFX2	1
HSPA1A	1
HSPA1B	1
HSPA1L	1
HSPB11	1
HSPB3	1
HSPBAP1	1
HTR1A	1
HTR1B	1
HTR1D	1
HTR1E	1
HTR1F	1
HTR2A	1
HTR2B	1
HTR2C	1
HTR3B	1
HTR3C	1
HVCN1	1
HYAL1	1
HYAL2	1
HYKK	1
HYLS1	1
HYPK	1
IAPP	1
IARS1	1
ICA1	1
ICAM2	1
ICOS	1
ID2	1
ID3	1
IDH3B	1
IDO1	1
IFI27	1
IFI30	1
IFI35	1
IFIT1	1
IFIT1B	1
IFIT2	1
IFIT3	1
IFIT5	1
IFITM1	1
IFNA1	1
IFNA13	1
IFNA16	1
IFNA2	1
IFNA21	1
IFNA5	1
IFNA6	1
IFNA8	1
IFNB1	1
IFNE	1
IFNGR2	1
IFNL1	1
IFNW1	1
IFT22	1
IFT27	1
IFT43	1
IFT46	1
IFT52	1
IGF1	1
IGF2	1
IGFL2	1
IGFL3	1
IGFL4	1
IGIP	1
IHO1	1
IKBKE	1
IKZF2	1
IKZF4	1
IKZF5	1
IL10	1
IL10RA	1
IL11RA	1
IL12B	1
IL13	1
IL13RA2	1
IL17A	1
IL18RAP	1
IL19	1
IL1A	1
IL1B	1
IL1R1	1
IL1R2	1
IL1RAPL1	1
IL1RL1	1
IL1RN	1
IL20	1
IL20RB	1
IL21R	1
IL22	1
IL22RA1	1
IL23A	1
IL23R	1
IL25	1
IL2RA	1
IL2RG	1
IL31	1
IL31RA	1
IL32	1
IL33	1
IL36A	1
IL36B	1
IL36G	1
IL36RN	1
IL37	1
IL4	1
IL5	1
IL5RA	1
IL6	1
IL9	1
ILF2	1
IMPDH2	1
INCA1	1
ING2	1
ING3	1
ING4	1
INHA	1
INHBE	1
INKA1	1
INPP4B	1
INSIG2	1
INSL4	1
INSL5	1
INSRR	1
INSYN2B	1
INTS10	1
INTS3	1
IPCEF1	1
IPP	1
IQCD	1
IQCF1	1
IQCF5	1
IQCF6	1
IQCG	1
IQCJ	1
IQCK	1
IREB2	1
IRF1	1
IRF9	1
IRGM	1
ISG15	1
ISOC2	1
ISX	1
ISY1-RAB43	1
ITFG2	1
ITGB1BP2	1
ITIH1	1
ITLN1	1
ITLN2	1
ITM2B	1
ITPA	1
ITPRIP	1
ITPRIPL1	1
IVD	1
IVL	1
IWS1	1
JADE1	1
JADE2	1
JAGN1	1
JAKMIP3	1
JAM3	1
JAML	1
JCHAIN	1
JHY	1
JOSD1	1
JTB	1
KANK1	1
KANSL1L	1
KANSL2	1
KARS1	1
KATNA1	1
KBTBD3	1
KBTBD6	1
KBTBD7	1
KCNA10	1
KCNA2	1
KCNAB1	1
KCNE1	1
KCNE3	1
KCNG4	1
KCNIP1	1
KCNJ1	1
KCNJ10	1
KCNJ11	1
KCNJ13	1
KCNJ15	1
KCNJ16	1
KCNJ2	1
KCNJ6	1
KCNK2	1
KCNK5	1
KCNK9	1
KCNMB1	1
KCNMB2	1
KCNN2	1
KCNS3	1
KCTD1	1
KCTD10	1
KCTD11	1
KCTD20	1
KCTD21	1
KCTD4	1
KCTD6	1
KDELR1	1
KDELR3	1
KDM1B	1
KDM4D	1
KDM5D	1
KDM8	1
KDSR	1
KERA	1
KHDC1	1
KHDC1L	1
KHDRBS3	1
KHK	1
KHNYN	1
KIAA0232	1
KIAA0319L	1
KICS2	1
KIF24	1
KIF25	1
KIF2B	1
KIF2C	1
KIF3B	1
KIF5A	1
KIR3DL3	1
KIRREL1	1
KLF10	1
KLF15	1
KLF17	1
KLHDC3	1
KLHDC8B	1
KLHL18	1
KLHL20	1
KLHL22	1
KLHL24	1
KLHL25	1
KLHL28	1
KLHL6	1
KLHL7	1
KLHL9	1
KLK1	1
KLK4	1
KLK6	1
KLK7	1
KLRB1	1
KLRD1	1
KLRG1	1
KNG1	1
KPNA1	1
KPNA3	1
KPNA6	1
KPNA7	1
KPRP	1
KRBA2	1
KRBOX4	1
KRCC1	1
KRT15	1
KRT222	1
KRT25	1
KRT26	1
KRT35	1
KRT36	1
KRT37	1
KRT4	1
KRT71	1
KRT74	1
KRT82	1
KRTAP1-1	1
KRTAP1-3	1
KRTAP12-1	1
KRTAP12-2	1
KRTAP12-3	1
KRTAP13-1	1
KRTAP13-2	1
KRTAP13-3	1
KRTAP13-4	1
KRTAP15-1	1
KRTAP16-1	1
KRTAP19-1	1
KRTAP19-2	1
KRTAP19-3	1
KRTAP19-4	1
KRTAP19-5	1
KRTAP19-7	1
KRTAP19-8	1
KRTAP20-1	1
KRTAP20-2	1
KRTAP20-3	1
[truncated: 16,326 more rows]
