# Supplementary material
Source: HighWire-hosted journal article supplement (https://ard.bmj.com/content/83/2/253)
Supplement: inline-supplementary-material-3 [file inline-supplementary-material-3.xlsx]

## Sheet: Ultra-rare damaging model
Ensembl Gene ID	Gene Symbol	Cases (n=66)	Controls (n=2923)	p values
ENSG00000057019	DCBLD2	5	2	1.4e-07
ENSG00000164402	SEPTIN8	2	1	0.000140542
ENSG00000003756	RBM5	2	2	0.000165391
ENSG00000126947	ARMCX1	2	0	0.000167392
ENSG00000156687	UNC5D	3	3	0.000185338
ENSG00000178226	PRSS36	2	2	0.000479065
ENSG00000124813	RUNX2	2	3	0.000552513
ENSG00000170624	SGCD	2	3	0.000575678
ENSG00000145715	RASA1	1	0	0.000600445
ENSG00000197614	MFAP5	1	0	0.000600445
ENSG00000221829	FANCG	1	0	0.000602604
ENSG00000107201	DDX58	2	3	0.000651026
ENSG00000124313	IQSEC2	2	2	0.000732356
ENSG00000198739	LRRTM3	2	1	0.00082128
ENSG00000112855	HARS2	1	0	0.00082572
ENSG00000188064	WNT7B	1	0	0.00082572
ENSG00000151687	ANKAR	2	3	0.00092951
ENSG00000117600	PLPPR4	2	3	0.000950637
ENSG00000101849	TBL1X	1	0	0.00107134
ENSG00000179761	PIPOX	1	0	0.00107134
ENSG00000138111	MFSD13A	1	0	0.00109936
ENSG00000064835	POU1F1	1	0	0.00109994
ENSG00000185651	UBE2L3	1	0	0.00109994
ENSG00000253797	UTP14C	1	0	0.00115606
ENSG00000102401	ARMCX3	1	0	0.00129695
ENSG00000104361	NIPAL2	1	0	0.00129695
ENSG00000164347	GFM2	1	0	0.00129695
ENSG00000100151	PICK1	1	0	0.00133919
ENSG00000138964	PARVG	1	0	0.00133919
ENSG00000142453	CARM1	2	4	0.00138575
ENSG00000087245	MMP2	2	5	0.00141034
ENSG00000078808	SDF4	1	0	0.00149627
ENSG00000137098	SPAG8	1	0	0.00149627
ENSG00000183579	ZNRF3	1	0	0.00149627
ENSG00000189171	S100A13	1	0	0.001506
ENSG00000100167	SEPTIN3	1	0	0.0015845
ENSG00000164418	GRIK2	1	0	0.0015845
ENSG00000167112	TRUB2	1	0	0.00159129
ENSG00000167825	OR5I1	1	0	0.00159129
ENSG00000184990	SIVA1	1	0	0.00159129
ENSG00000221914	PPP2R2A	1	0	0.00159129
ENSG00000133027	PEMT	1	0	0.00161473
ENSG00000149100	EIF3M	1	0	0.00161473
ENSG00000168763	CNNM3	1	0	0.00164561
ENSG00000170743	SYT9	1	0	0.00164561
ENSG00000174886	NDUFA11	1	0	0.00164561
ENSG00000163817	SLC6A20	2	5	0.00176266
ENSG00000135624	CCT7	1	0	0.00177524
ENSG00000132466	ANKRD17	2	4	0.00179291
ENSG00000107338	SHB	1	0	0.001804
ENSG00000174963	ZIC4	1	0	0.00186851
ENSG00000242173	ARHGDIG	1	0	0.00186851
ENSG00000115091	ACTR3	1	0	0.00192574
ENSG00000081148	IMPG2	1	0	0.00194196
ENSG00000182070	OR52A1	1	0	0.00196919
ENSG00000150753	CCT5	1	1	0.00219243
ENSG00000173020	GRK2	1	0	0.00221827
ENSG00000111911	HINT3	1	0	0.00231363
ENSG00000180155	LYNX1	1	0	0.002458
ENSG00000101076	HNF4A	1	0	0.00257078
ENSG00000147955	SIGMAR1	1	0	0.00257078
ENSG00000174010	KLHL15	1	0	0.00257078
ENSG00000095209	TMEM38B	1	0	0.00261202
ENSG00000160216	AGPAT3	1	0	0.00261202
ENSG00000179873	NLRP11	1	0	0.00261202
ENSG00000198467	TPM2	1	0	0.00261202
ENSG00000091622	PITPNM3	1	0	0.00261537
ENSG00000144152	FBLN7	1	0	0.00261537
ENSG00000167005	NUDT21	1	0	0.00261537
ENSG00000173926	MARCHF3	1	0	0.00261537
ENSG00000114744	COMMD2	1	0	0.00261549
ENSG00000189339	SLC35E2B	1	1	0.00266441
ENSG00000147155	EBP	1	0	0.00266726
ENSG00000131668	BARX1	1	0	0.00267694
ENSG00000164822	DEFA6	1	0	0.00267694
ENSG00000256525	POLG2	1	0	0.00274961
ENSG00000145623	OSMR	1	0	0.00277524
ENSG00000160908	ZNF394	1	0	0.00277524
ENSG00000088035	ALG6	1	0	0.00278021
ENSG00000130699	TAF4	1	0	0.00278021
ENSG00000100744	GSKIP	1	0	0.00295583
ENSG00000112365	ZBTB24	1	0	0.00304505
ENSG00000112539	C6orf118	1	0	0.00304505
ENSG00000105971	CAV2	1	0	0.00307688
ENSG00000179841	AKAP5	1	0	0.00307688
ENSG00000105373	NOP53	1	1	0.00310332
ENSG00000113649	TCERG1	1	1	0.0034077
ENSG00000108468	CBX1	1	1	0.00342511
ENSG00000100554	ATP6V1D	1	0	0.00343605
ENSG00000132341	RAN	1	0	0.00343605
ENSG00000177548	RABEP2	1	0	0.00343605
ENSG00000072954	TMEM38A	1	0	0.00344231
ENSG00000123405	NFE2	1	0	0.00344231
ENSG00000156261	CCT8	1	0	0.00344231
ENSG00000161807	OR7G1	1	0	0.00344231
ENSG00000146409	SLC18B1	1	1	0.00353687
ENSG00000171094	ALK	2	7	0.0036362
ENSG00000164743	C8orf48	1	1	0.00363723
ENSG00000205730	ITPRIPL2	2	3	0.00385504
ENSG00000147160	AWAT2	1	1	0.00391966
ENSG00000256394	ASIC5	1	1	0.00395456
ENSG00000205126	ACCSL	1	1	0.00397875
ENSG00000184402	SS18L1	1	1	0.00399014
ENSG00000136235	GPNMB	1	1	0.00399842
ENSG00000163577	EIF5A2	1	1	0.00405364
ENSG00000179988	PSTK	1	0	0.00422851
ENSG00000108773	KAT2A	1	1	0.00424273
ENSG00000162771	FAM71A	1	0	0.00427669
ENSG00000112079	STK38	1	1	0.00428885
ENSG00000107295	SH3GL2	1	1	0.00432493
ENSG00000108654	DDX5	1	1	0.00435397
ENSG00000125630	POLR1B	1	2	0.00437291
ENSG00000197019	SERTAD1	1	1	0.0043921
ENSG00000142459	EVI5L	1	1	0.00444187
ENSG00000163617	CCDC191	1	1	0.00460808
ENSG00000122584	NXPH1	1	1	0.0046157
ENSG00000105696	TMEM59L	1	1	0.00462793
ENSG00000166278	C2	2	4	0.00481941
ENSG00000021461	CYP3A43	1	1	0.00484857
ENSG00000170175	CHRNB1	1	1	0.00485962
ENSG00000187257	RSBN1L	1	1	0.00493703
ENSG00000145912	NHP2	1	0	0.00502919
ENSG00000177868	SVBP	1	0	0.00502919
ENSG00000198816	ZNF358	1	0	0.00502919
ENSG00000130827	PLXNA3	2	6	0.00503891
ENSG00000198876	DCAF12	1	1	0.00515185
ENSG00000083123	BCKDHB	1	0	0.00515406
ENSG00000118804	STBD1	1	0	0.00515406
ENSG00000163254	CRYGC	1	0	0.00515406
ENSG00000163946	TASOR	1	1	0.0051816
ENSG00000117500	TMED5	1	2	0.00521179
ENSG00000163376	KBTBD8	1	1	0.00524219
ENSG00000168792	ABHD15	1	1	0.00525498
ENSG00000141933	TPGS1	1	1	0.00526648
ENSG00000101224	CDC25B	1	1	0.00527869
ENSG00000130844	ZNF331	1	1	0.00533243
ENSG00000023734	STRAP	1	1	0.00536771
ENSG00000145861	C1QTNF2	1	1	0.00539873
ENSG00000174348	PODN	1	1	0.00541215
ENSG00000151005	TKTL2	1	1	0.00548587
ENSG00000174943	KCTD13	1	1	0.00551694
ENSG00000144036	EXOC6B	1	1	0.005555
ENSG00000163536	SERPINI1	1	1	0.00559326
ENSG00000160058	BSDC1	1	1	0.00566722
ENSG00000100664	EIF5	1	1	0.00567149
ENSG00000185404	SP140L	1	0	0.0056987
ENSG00000070950	RAD18	1	1	0.00573935
ENSG00000128271	ADORA2A	1	1	0.00575096
ENSG00000205927	OLIG2	1	1	0.00575453
ENSG00000180772	AGTR2	1	1	0.00581426
ENSG00000119718	EIF2B2	1	0	0.00581993
ENSG00000167011	NAT16	1	0	0.00581993
ENSG00000115053	NCL	1	2	0.00599111
ENSG00000168385	SEPTIN2	1	1	0.00602534
ENSG00000178772	CPN2	1	1	0.00605735
ENSG00000171604	CXXC5	1	1	0.00610549
ENSG00000064195	DLX3	1	2	0.00612707
ENSG00000175137	SH3BP5L	1	1	0.00615606
ENSG00000126216	TUBGCP3	1	1	0.006202
ENSG00000148331	ASB6	1	1	0.00623655
ENSG00000175143	OR2T1	1	1	0.00635771
ENSG00000115641	FHL2	1	1	0.00636623
ENSG00000175467	SART1	1	1	0.00637122
ENSG00000112941	TENT4A	1	1	0.0064676
ENSG00000128274	A4GALT	1	1	0.0064697
ENSG00000029725	RABEP1	1	1	0.00654879
ENSG00000153140	CETN3	1	1	0.0065511
ENSG00000121680	PEX16	1	1	0.00657241
ENSG00000159496	RGL4	1	1	0.00660603
ENSG00000205339	IPO7	1	0	0.00662444
ENSG00000082175	PGR	1	0	0.00663129
ENSG00000143228	NUF2	1	1	0.00667378
ENSG00000171049	FPR2	1	2	0.00677054
ENSG00000186297	GABRA5	1	1	0.00679532
ENSG00000090530	P3H2	1	2	0.006797
ENSG00000163157	TMOD4	1	1	0.00682757
ENSG00000124795	DEK	1	1	0.00691032
ENSG00000196653	ZNF502	1	1	0.00694454
ENSG00000197901	SLC22A6	1	1	0.00697362
ENSG00000086696	HSD17B2	1	1	0.00697871
ENSG00000128886	ELL3	1	1	0.00701179
ENSG00000099994	SUSD2	1	1	0.00703421
ENSG00000185972	CCIN	1	1	0.00705826
ENSG00000165966	PDZRN4	1	2	0.00708453
ENSG00000092969	TGFB2	1	1	0.00709249
ENSG00000125910	S1PR4	1	1	0.00711159
ENSG00000122008	POLK	1	2	0.00712961
ENSG00000174970	OR10AG1	1	1	0.00720508
ENSG00000123838	C4BPA	1	2	0.00721894
ENSG00000132912	DCTN4	1	1	0.0072624
ENSG00000023697	DERA	1	1	0.00728292
ENSG00000184343	SRPK3	1	1	0.00744088
ENSG00000126759	CFP	1	2	0.00758296
ENSG00000077514	POLD3	1	2	0.00765662
ENSG00000044446	PHKA2	1	1	0.00767789
ENSG00000129151	BBOX1	1	2	0.00770447
ENSG00000162068	NTN3	1	2	0.00777568
ENSG00000130762	ARHGEF16	1	1	0.0078148
ENSG00000241685	ARPC1A	1	1	0.00796488
ENSG00000006025	OSBPL7	1	2	0.00797741
ENSG00000147246	HTR2C	1	1	0.00810107
ENSG00000105642	KCNN1	1	1	0.00814757
ENSG00000112078	KCTD20	1	2	0.0081492
ENSG00000104177	MYEF2	1	2	0.0082034
ENSG00000198954	KIFBP	1	2	0.00830074
ENSG00000105829	BET1	1	1	0.00838187
ENSG00000142102	PGGHG	1	2	0.00846205
ENSG00000139540	SLC39A5	1	3	0.00847836
ENSG00000255245	FXYD6-FXYD2	1	1	0.00851898
ENSG00000197483	ZNF628	1	2	0.00855992
ENSG00000163637	PRICKLE2	1	1	0.00863545
ENSG00000237515	SHISA9	1	1	0.00872743
ENSG00000159708	LRRC36	1	2	0.00875288
ENSG00000145911	N4BP3	1	2	0.00876926
ENSG00000243646	IL10RB	1	2	0.00880392
ENSG00000127325	BEST3	1	2	0.00881291
ENSG00000149295	DRD2	1	1	0.00910878
ENSG00000126016	AMOT	1	2	0.00916025
ENSG00000137691	CFAP300	1	2	0.00920402
ENSG00000198890	PRMT6	1	2	0.00923521
ENSG00000019582	CD74	1	1	0.00927593
ENSG00000102755	FLT1	1	2	0.00935846
ENSG00000114520	SNX4	1	1	0.00938794
ENSG00000144331	ZNF385B	1	2	0.00952331
ENSG00000158488	CD1E	1	1	0.00962037
ENSG00000087157	PGS1	1	2	0.00964474
ENSG00000031081	ARHGAP31	1	2	0.00969193
ENSG00000162191	UBXN1	1	2	0.00971473
ENSG00000122122	SASH3	1	2	0.00985678
ENSG00000169967	MAP3K2	1	2	0.00991184
ENSG00000146243	IRAK1BP1	1	1	0.0099889
ENSG00000100243	CYB5R3	1	1	0.0100839
ENSG00000147687	TATDN1	1	2	0.0101296
ENSG00000188133	TMEM215	1	2	0.0101371
ENSG00000164039	BDH2	1	1	0.0102711
ENSG00000144566	RAB5A	1	2	0.0102868
ENSG00000132004	FBXW9	1	1	0.0103004
ENSG00000155719	OTOA	1	2	0.0103199
ENSG00000186113	OR5D14	1	2	0.0103618
ENSG00000082438	COBLL1	1	2	0.0103621
ENSG00000113966	ARL6	1	1	0.0103809
ENSG00000166411	IDH3A	1	2	0.0103847
ENSG00000144061	NPHP1	1	2	0.0104858
ENSG00000214415	GNAT3	1	1	0.0105887
ENSG00000158796	DEDD	1	2	0.0106704
ENSG00000141086	CTRL	1	1	0.0107318
ENSG00000175115	PACS1	1	2	0.0107923
ENSG00000060069	CTDP1	1	2	0.0108165
ENSG00000176105	YES1	1	2	0.0108749
ENSG00000102780	DGKH	1	2	0.0109424
ENSG00000187021	PNLIPRP1	1	2	0.0110478
ENSG00000168060	NAALADL1	1	2	0.0110556
ENSG00000007001	UPP2	1	2	0.011089
ENSG00000144649	GASK1A	1	2	0.0111609
ENSG00000180592	SKIDA1	2	6	0.0112031
ENSG00000140937	CDH11	1	2	0.0113196
ENSG00000178645	C10orf53	1	1	0.0113594
ENSG00000171766	GATM	1	3	0.0114186
ENSG00000066468	FGFR2	1	2	0.0115299
ENSG00000130714	POMT1	2	6	0.0116302
ENSG00000069667	RORA	1	1	0.0116309
ENSG00000130997	POLN	1	2	0.0117363
ENSG00000166435	XRRA1	1	2	0.0117685
ENSG00000115942	ORC2	1	2	0.0117804
ENSG00000141562	NARF	1	2	0.0118302
ENSG00000111452	ADGRD1	1	3	0.0118543
ENSG00000100441	KHNYN	1	0	0.0118584
ENSG00000128652	HOXD3	1	0	0.0118584
ENSG00000135587	SMPD2	1	0	0.0118584
ENSG00000140107	SLC25A47	1	0	0.0118584
ENSG00000141279	NPEPPS	1	0	0.0118584
ENSG00000159713	TPPP3	1	0	0.0118584
ENSG00000173114	LRRN3	1	0	0.0118584
ENSG00000197496	SLC2A10	1	0	0.0118584
ENSG00000151023	ENKUR	1	2	0.0119109
ENSG00000014164	ZC3H3	1	1	0.0119336
ENSG00000135905	DOCK10	2	12	0.0119551
ENSG00000107281	NPDC1	1	2	0.0120867
ENSG00000108039	XPNPEP1	1	2	0.0124207
ENSG00000135740	SLC9A5	1	3	0.0124422
ENSG00000168209	DDIT4	1	2	0.0126062
ENSG00000008277	ADAM22	1	2	0.0126175
ENSG00000055609	KMT2C	2	12	0.0126246
ENSG00000001631	KRIT1	1	3	0.0126722
ENSG00000119431	HDHD3	1	0	0.0127101
ENSG00000134215	VAV3	1	1	0.0127879
ENSG00000214491	SEC14L6	1	1	0.0129182
ENSG00000071991	CDH19	1	0	0.0129416
ENSG00000159200	RCAN1	1	0	0.0129416
ENSG00000165185	KIAA1958	1	3	0.0129688
ENSG00000083896	YTHDC1	1	3	0.0130102
ENSG00000005001	PRSS22	1	1	0.0130752
ENSG00000105723	GSK3A	1	3	0.0130792
ENSG00000135775	COG2	1	2	0.013138
ENSG00000148600	CDHR1	1	3	0.0131484
ENSG00000153253	SCN3A	1	3	0.0131751
ENSG00000132003	ZSWIM4	1	3	0.0132542
ENSG00000162434	JAK1	1	3	0.0135028
ENSG00000102362	SYTL4	1	3	0.0135065
ENSG00000204852	TCTN1	1	2	0.0136806
ENSG00000136824	SMC2	1	2	0.0137589
ENSG00000146530	VWDE	1	3	0.0138782
ENSG00000186204	CYP4F12	1	2	0.0141291
ENSG00000112367	FIG4	1	3	0.0141515
ENSG00000161791	FMNL3	1	4	0.0142162
ENSG00000138678	GPAT3	1	2	0.014218
ENSG00000127837	AAMP	1	4	0.0143137
ENSG00000078295	ADCY2	1	3	0.0143538
ENSG00000183570	PCBP3	1	2	0.0144239
ENSG00000137814	HAUS2	1	2	0.0144305
ENSG00000111667	USP5	1	3	0.014483
ENSG00000074276	CDHR2	1	3	0.0145465
ENSG00000135900	MRPL44	1	0	0.014637
ENSG00000198231	DDX42	1	0	0.014637
ENSG00000104973	MED25	1	3	0.0147752
ENSG00000104824	HNRNPL	1	1	0.0148437
ENSG00000089847	ANKRD24	1	3	0.0148561
ENSG00000117139	KDM5B	1	2	0.0149733
ENSG00000141570	CBX8	1	3	0.0149874
ENSG00000167114	SLC27A4	1	3	0.0151774
ENSG00000144837	PLA1A	1	2	0.0152482
ENSG00000111199	TRPV4	1	3	0.0153435
ENSG00000007237	GAS7	1	3	0.0155465
ENSG00000177707	NECTIN3	1	1	0.0156017
ENSG00000147145	LPAR4	1	2	0.015605
ENSG00000183798	EMILIN3	1	4	0.0156698
ENSG00000136237	RAPGEF5	1	2	0.0156715
ENSG00000113763	UNC5A	1	3	0.0156806
ENSG00000138639	ARHGAP24	1	3	0.0156961
ENSG00000197081	IGF2R	1	3	0.0157121
ENSG00000090861	AARS1	2	14	0.0157155
ENSG00000182578	CSF1R	1	3	0.0157518
ENSG00000075213	SEMA3A	1	4	0.0158647
ENSG00000165973	NELL1	1	2	0.0158701
ENSG00000147799	ARHGAP39	1	3	0.0158754
ENSG00000101181	MTG2	1	2	0.0159922
ENSG00000112077	RHAG	1	3	0.0159987
ENSG00000064932	SBNO2	1	3	0.0160135
ENSG00000205683	DPF3	1	2	0.0160342
ENSG00000197442	MAP3K5	1	3	0.0161014
ENSG00000141376	BCAS3	1	3	0.0162114
ENSG00000131037	EPS8L1	1	3	0.0162186
ENSG00000130175	PRKCSH	1	3	0.0162382
ENSG00000031823	RANBP3	1	3	0.0163148
ENSG00000135968	GCC2	1	4	0.016342
ENSG00000140650	PMM2	1	3	0.0165563
ENSG00000112584	FAM120B	1	2	0.0168747
ENSG00000054611	TBC1D22A	1	4	0.0169311
ENSG00000134369	NAV1	1	4	0.0169341
ENSG00000122367	LDB3	1	2	0.017017
ENSG00000099821	POLRMT	1	2	0.0172927
ENSG00000135617	PRADC1	1	2	0.0173111
ENSG00000136404	TM6SF1	1	2	0.0173278
ENSG00000213672	NCKIPSD	1	2	0.017373
ENSG00000106571	GLI3	1	2	0.0174223
ENSG00000237441	RGL2	1	2	0.0175121
ENSG00000152409	JMY	1	2	0.0175256
ENSG00000159267	HLCS	1	3	0.0176928
ENSG00000110013	SIAE	1	1	0.0177658
ENSG00000147324	MFHAS1	1	3	0.0177934
ENSG00000154646	TMPRSS15	2	7	0.0178421
ENSG00000243284	VSIG8	1	4	0.0179689
ENSG00000157404	KIT	1	3	0.018009
ENSG00000148602	LRIT1	1	2	0.0182347
ENSG00000131379	C3orf20	1	4	0.0183747
ENSG00000138646	HERC5	1	1	0.0184394
ENSG00000162627	SNX7	1	4	0.01869
ENSG00000154930	ACSS1	1	3	0.0187838
ENSG00000067334	DNTTIP2	1	3	0.0188014
ENSG00000099219	ERMP1	1	3	0.0189072
ENSG00000132467	UTP3	1	3	0.0190725
ENSG00000165355	FBXO33	1	2	0.0191669
ENSG00000157927	RADIL	1	4	0.0191778
ENSG00000174837	ADGRE1	1	3	0.0192302
ENSG00000178537	SLC25A20	1	2	0.0192705
ENSG00000137656	BUD13	1	3	0.0193749
ENSG00000170419	VSTM2A	1	1	0.0193814
ENSG00000188089	PLA2G4E	1	4	0.0195642
ENSG00000119777	TMEM214	1	4	0.0195666
ENSG00000198707	CEP290	2	14	0.0195892
ENSG00000162924	REL	1	3	0.0196553
ENSG00000164111	ANXA5	1	2	0.019827
ENSG00000125484	GTF3C4	1	1	0.0198868
ENSG00000163935	SFMBT1	1	4	0.0198888
ENSG00000138378	STAT4	1	4	0.0199759
ENSG00000108515	ENO3	1	1	0.0201773
ENSG00000124772	CPNE5	1	3	0.0201876
ENSG00000156599	ZDHHC5	1	3	0.0203065
ENSG00000173706	HEG1	1	4	0.0203411
ENSG00000104856	RELB	1	3	0.0204306
ENSG00000088833	NSFL1C	1	3	0.0205192
ENSG00000146833	TRIM4	1	2	0.0205527
ENSG00000169851	PCDH7	1	4	0.0205777
ENSG00000151150	ANK3	2	13	0.0206055
ENSG00000008294	SPAG9	1	4	0.0207864
ENSG00000100523	DDHD1	1	4	0.0208506
ENSG00000187531	SIRT7	1	4	0.0209064
ENSG00000118900	UBN1	1	5	0.0209729
ENSG00000141568	FOXK2	1	1	0.0210511
ENSG00000117322	CR2	1	3	0.0211828
ENSG00000014216	CAPN1	1	3	0.0213728
ENSG00000197181	PIWIL2	1	3	0.0215227
ENSG00000100979	PLTP	1	3	0.0216038
ENSG00000167619	TMEM145	1	4	0.0216254
ENSG00000161542	PRPSAP1	1	2	0.02164
ENSG00000136243	NUP42	1	2	0.0216883
ENSG00000114450	GNB4	1	3	0.0216926
ENSG00000187522	HSPA14	1	3	0.0218419
ENSG00000103160	HSDL1	1	3	0.022018
ENSG00000166860	ZBTB39	1	3	0.0221019
ENSG00000196220	SRGAP3	1	4	0.0221037
ENSG00000106624	AEBP1	1	4	0.0221236
ENSG00000157110	RBPMS	1	0	0.0221399
ENSG00000187486	KCNJ11	1	3	0.0221835
ENSG00000169682	SPNS1	1	3	0.0224638
ENSG00000108423	TUBD1	1	4	0.0224643
ENSG00000102984	ZNF821	1	2	0.0224728
ENSG00000080166	DCT	1	5	0.0224794
ENSG00000122574	WIPF3	1	4	0.0225605
ENSG00000143373	ZNF687	1	4	0.0225633
ENSG00000118322	ATP10B	1	4	0.0225637
ENSG00000140694	PARN	1	4	0.022658
ENSG00000100412	ACO2	1	2	0.0226793
ENSG00000133706	LARS1	1	4	0.0228433
ENSG00000131844	MCCC2	1	3	0.0229283
ENSG00000169031	COL4A3	1	4	0.0230115
ENSG00000089094	KDM2B	1	3	0.0232204
ENSG00000214063	TSPAN4	1	4	0.0232307
ENSG00000187764	SEMA4D	1	4	0.0236747
ENSG00000041880	PARP3	1	3	0.0239696
ENSG00000172238	ATOH1	1	4	0.024186
ENSG00000089060	SLC8B1	1	3	0.0243485
ENSG00000008838	MED24	1	4	0.0244288
ENSG00000214595	EML6	2	16	0.0245447
ENSG00000101057	MYBL2	1	2	0.0246563
ENSG00000140199	SLC12A6	1	5	0.0247521
ENSG00000006007	GDE1	1	4	0.0248143
ENSG00000135913	USP37	1	3	0.0248826
ENSG00000179593	ALOX15B	1	3	0.0249875
ENSG00000088298	EDEM2	1	3	0.0250851
ENSG00000137177	KIF13A	1	4	0.0251566
ENSG00000137807	KIF23	1	4	0.0251878
ENSG00000077782	FGFR1	1	4	0.025206
ENSG00000151693	ASAP2	1	4	0.02523
ENSG00000145526	CDH18	1	3	0.0253323
ENSG00000162746	FCRLB	1	3	0.0253677
ENSG00000125779	PANK2	1	5	0.0254015
ENSG00000154262	ABCA6	1	4	0.025468
ENSG00000088827	SIGLEC1	1	5	0.0255198
ENSG00000008311	AASS	1	4	0.0256581
ENSG00000188984	AADACL3	1	4	0.0258534
ENSG00000094880	CDC23	1	4	0.0260331
ENSG00000113790	EHHADH	1	4	0.0261296
ENSG00000111052	LIN7A	1	3	0.0264407
ENSG00000153066	TXNDC11	1	5	0.0267817
ENSG00000143379	SETDB1	1	5	0.0268242
ENSG00000115616	SLC9A2	1	2	0.0269963
ENSG00000131149	GSE1	1	4	0.0270718
ENSG00000081277	PKP1	1	2	0.0273655
ENSG00000214021	TTLL3	1	5	0.0273858
ENSG00000142233	NTN5	1	3	0.0275201
ENSG00000058085	LAMC2	1	4	0.0275651
ENSG00000170558	CDH2	1	3	0.0275729
ENSG00000132128	LRRC41	1	4	0.027578
ENSG00000036257	CUL3	1	4	0.0278563
ENSG00000173320	STOX2	1	4	0.0278825
ENSG00000173200	PARP15	1	3	0.0278982
ENSG00000178235	SLITRK1	1	5	0.0280564
ENSG00000096384	HSP90AB1	1	5	0.0280693
ENSG00000168564	CDKN2AIP	1	3	0.02812
ENSG00000144824	PHLDB2	1	5	0.0281677
ENSG00000167880	EVPL	1	4	0.0281986
ENSG00000080603	SRCAP	2	19	0.0283517
ENSG00000140323	DISP2	1	5	0.028411
ENSG00000163449	TMEM169	1	1	0.0286946
ENSG00000167037	SGSM1	1	5	0.0287066
ENSG00000032444	PNPLA6	1	5	0.0287405
ENSG00000100418	DESI1	1	3	0.0288871
ENSG00000166342	NETO1	1	5	0.0289415
ENSG00000136536	MARCHF7	1	4	0.0290529
ENSG00000172575	RASGRP1	1	2	0.0290633
ENSG00000141664	ZCCHC2	1	4	0.029353
ENSG00000073969	NSF	1	4	0.0294496
ENSG00000073756	PTGS2	1	4	0.0294921
ENSG00000185046	ANKS1B	1	5	0.0297084
ENSG00000170448	NFXL1	1	3	0.029936
ENSG00000144711	IQSEC1	1	2	0.0300089
ENSG00000169862	CTNND2	1	4	0.0301553
ENSG00000164620	RELL2	1	3	0.0301579
ENSG00000162782	TDRD5	1	3	0.0304776
ENSG00000130702	LAMA5	2	15	0.0306382
ENSG00000091129	NRCAM	1	4	0.0307618
ENSG00000100941	PNN	1	5	0.0307907
ENSG00000011426	ANLN	1	2	0.0308796
ENSG00000198919	DZIP3	1	5	0.0310765
ENSG00000068120	COASY	1	5	0.0312813
ENSG00000160789	LMNA	1	5	0.0312905
ENSG00000014919	COX15	1	0	0.0313856
ENSG00000131828	PDHA1	1	0	0.0313856
ENSG00000204010	IFIT1B	1	0	0.0313856
ENSG00000253506	NACA2	1	0	0.0313856
ENSG00000118407	FILIP1	1	5	0.0314597
ENSG00000137713	PPP2R1B	1	5	0.0318122
ENSG00000116183	PAPPA2	1	6	0.0318893
ENSG00000179002	TAS1R2	1	5	0.0319626
ENSG00000244694	PTCHD4	1	5	0.0320608
ENSG00000158486	DNAH3	2	16	0.0321386
ENSG00000183032	SLC25A21	1	3	0.0323411
ENSG00000149633	KIAA1755	1	5	0.0323797
ENSG00000138286	FAM149B1	1	5	0.0324647
ENSG00000131381	RBSN	1	5	0.0324855
ENSG00000135297	MTO1	1	2	0.0325632
ENSG00000146463	ZMYM4	1	6	0.0326103
ENSG00000135502	SLC26A10	1	5	0.0327378
ENSG00000060971	ACAA1	1	5	0.0328364
ENSG00000120729	MYOT	1	2	0.0330241
ENSG00000151164	RAD9B	1	1	0.0331305
ENSG00000143643	TTC13	1	5	0.033149
ENSG00000186487	MYT1L	1	1	0.0335549
ENSG00000213445	SIPA1	1	4	0.0337568
ENSG00000156535	CD109	1	5	0.0339139
ENSG00000103429	BFAR	1	2	0.0341057
ENSG00000176225	RTTN	1	6	0.0341392
ENSG00000163932	PRKCD	1	1	0.0342083
ENSG00000105135	ILVBL	1	5	0.0342314
ENSG00000129518	EAPP	1	1	0.0342493
ENSG00000136531	SCN2A	1	6	0.034385
ENSG00000141447	OSBPL1A	1	5	0.0346561
ENSG00000184005	ST6GALNAC3	1	5	0.0351235
ENSG00000138434	ITPRID2	1	5	0.0351981
ENSG00000112282	MED23	1	5	0.0353184
ENSG00000053524	MCF2L2	1	4	0.0353896
ENSG00000111087	GLI1	1	4	0.0356419
ENSG00000040199	PHLPP2	1	6	0.0359781
ENSG00000172403	SYNPO2	1	8	0.0359962
ENSG00000182979	MTA1	1	5	0.0360682
ENSG00000090975	PITPNM2	1	6	0.0364029
ENSG00000137055	PLAA	1	4	0.0365611
ENSG00000178662	CSRNP3	1	5	0.0366423
ENSG00000125485	DDX31	1	5	0.0367594
ENSG00000151491	EPS8	1	7	0.0370774
ENSG00000177646	ACAD9	1	5	0.037079
ENSG00000133835	HSD17B4	1	4	0.0371303
ENSG00000183873	SCN5A	1	8	0.037143
ENSG00000158636	EMSY	1	5	0.0373877
ENSG00000154133	ROBO4	1	5	0.0374515
ENSG00000164327	RICTOR	1	6	0.0374939
ENSG00000167107	ACSF2	1	5	0.0375601
ENSG00000110237	ARHGEF17	1	5	0.0376627
ENSG00000134909	ARHGAP32	1	6	0.0376919
ENSG00000075651	PLD1	1	2	0.0379258
ENSG00000112624	BICRAL	1	6	0.0379894
ENSG00000166866	MYO1A	1	6	0.038117
ENSG00000090989	EXOC1	1	5	0.0382722
ENSG00000145348	TBCK	1	5	0.0383118
ENSG00000130856	ZNF236	1	6	0.0384894
ENSG00000134905	CARS2	1	5	0.0386211
ENSG00000134121	CHL1	1	4	0.0386868
ENSG00000158941	CCAR2	1	4	0.0387247
ENSG00000127412	TRPV5	1	2	0.0387313
ENSG00000173698	ADGRG2	1	1	0.0388882
ENSG00000164458	TBXT	1	3	0.0388907
ENSG00000257335	MGAM	1	5	0.0388972
ENSG00000171759	PAH	1	4	0.0389068
ENSG00000101542	CDH20	1	4	0.0389095
ENSG00000148019	CEP78	1	6	0.039317
ENSG00000137878	GCOM1	1	3	0.0393502
ENSG00000119787	ATL2	1	5	0.0393663
ENSG00000137274	BPHL	1	1	0.0395304
ENSG00000048649	RSF1	1	6	0.0396404
ENSG00000170854	RIOX2	1	2	0.0398559
ENSG00000143418	CERS2	1	1	0.0398737
ENSG00000187796	CARD9	1	1	0.0399327
ENSG00000203965	EFCAB7	1	0	0.0400067
ENSG00000168056	LTBP3	1	7	0.0403986
ENSG00000174672	BRSK2	1	6	0.0404827
ENSG00000006652	IFRD1	1	3	0.0406082
ENSG00000178295	GEN1	1	3	0.0406472
ENSG00000197157	SND1	1	2	0.0406651
ENSG00000198018	ENTPD7	1	5	0.040889
ENSG00000157060	SHCBP1L	1	3	0.0409349
ENSG00000167632	TRAPPC9	1	6	0.0409412
ENSG00000163531	NFASC	1	7	0.041145
ENSG00000197299	BLM	1	4	0.041444
ENSG00000101407	TTI1	1	5	0.041451
ENSG00000171503	ETFDH	1	4	0.0414669
ENSG00000164615	CAMLG	1	4	0.0414839
ENSG00000081791	DELE1	1	1	0.0418173
ENSG00000164292	RHOBTB3	1	7	0.0419344
ENSG00000107099	DOCK8	2	19	0.0423738
ENSG00000180198	RCC1	1	6	0.0425673
ENSG00000106665	CLIP2	1	3	0.0426244
ENSG00000102385	DRP2	1	4	0.0432784
ENSG00000172071	EIF2AK3	1	6	0.0437422
ENSG00000132932	ATP8A2	1	7	0.0439994
ENSG00000249158	PCDHA11	1	5	0.0440928
ENSG00000114541	FRMD4B	1	6	0.0441084
ENSG00000171612	SLC25A33	1	4	0.0441882
ENSG00000183454	GRIN2A	1	6	0.044387
ENSG00000079691	CARMIL1	1	6	0.0444273
ENSG00000112337	SLC17A2	1	2	0.044443
ENSG00000235718	MFRP	1	5	0.0444753
ENSG00000161996	WDR90	1	6	0.0446506
ENSG00000092529	CAPN3	1	6	0.044783
ENSG00000120457	KCNJ5	1	6	0.0451235
ENSG00000186714	CCDC73	1	5	0.0452023
ENSG00000083168	KAT6A	1	6	0.0456531
ENSG00000141449	GREB1L	1	7	0.0457749
ENSG00000091137	SLC26A4	1	4	0.0458341
ENSG00000148468	FAM171A1	1	6	0.0465662
ENSG00000204256	BRD2	1	5	0.0470121
ENSG00000143578	CREB3L4	1	3	0.047081
ENSG00000128815	WDFY4	1	6	0.0472135
ENSG00000060237	WNK1	1	6	0.047217
ENSG00000118482	PHF3	1	8	0.047522
ENSG00000172053	QARS1	1	5	0.0475228
ENSG00000185722	ANKFY1	1	6	0.0476128
ENSG00000104936	DMPK	1	7	0.0476886
ENSG00000144645	OSBPL10	1	6	0.0479204
ENSG00000054654	SYNE2	2	25	0.0480936
ENSG00000162994	CLHC1	1	3	0.048214
ENSG00000087111	PIGS	1	3	0.048555
ENSG00000177103	DSCAML1	1	6	0.0491304
ENSG00000166035	LIPC	1	1	0.0498004
ENSG00000149403	GRIK4	1	7	0.0500224
ENSG00000070366	SMG6	1	7	0.0500402
ENSG00000091490	SEL1L3	1	8	0.0500667
ENSG00000070814	TCOF1	1	6	0.0504198
ENSG00000104738	MCM4	1	6	0.0505771
ENSG00000135838	NPL	1	2	0.050599
ENSG00000108883	EFTUD2	1	7	0.0506059
ENSG00000188352	FOCAD	1	6	0.0509284
ENSG00000152503	TRIM36	1	7	0.0512405
ENSG00000140577	CRTC3	1	7	0.0513027
ENSG00000140481	CCDC33	1	4	0.0516442
ENSG00000148843	PDCD11	1	8	0.0518066
ENSG00000100644	HIF1A	1	7	0.0521344
ENSG00000012124	CD22	1	3	0.0522096
ENSG00000172318	B3GALT1	1	3	0.0524222
ENSG00000104613	INTS10	1	7	0.0525177
ENSG00000169306	IL1RAPL1	1	5	0.0525264
ENSG00000241973	PI4KA	1	9	0.0526334
ENSG00000163913	IFT122	1	4	0.0529424
ENSG00000204262	COL5A2	1	7	0.0533007
ENSG00000136153	LMO7	1	6	0.0533056
ENSG00000091262	ABCC6	1	6	0.0533511
ENSG00000095321	CRAT	1	5	0.0534771
ENSG00000175928	LRRN1	1	3	0.0536513
ENSG00000138771	SHROOM3	1	5	0.0537075
ENSG00000125257	ABCC4	1	6	0.0538113
ENSG00000105426	PTPRS	1	8	0.0542707
ENSG00000134013	LOXL2	1	6	0.0547105
ENSG00000162104	ADCY9	1	4	0.0549998
ENSG00000182463	TSHZ2	1	5	0.0551616
ENSG00000089012	SIRPG	1	1	0.0555199
ENSG00000140553	UNC45A	1	7	0.0558929
ENSG00000071564	TCF3	1	4	0.0558945
ENSG00000111962	UST	1	1	0.0559722
ENSG00000259030	FPGT-TNNI3K	1	8	0.0560116
ENSG00000133958	UNC79	1	9	0.0565907
ENSG00000052749	RRP12	1	8	0.0569912
ENSG00000186212	SOWAHB	1	3	0.0571083
ENSG00000073614	KDM5A	1	7	0.0571314
ENSG00000138448	ITGAV	1	8	0.0577224
ENSG00000150054	MPP7	1	6	0.0581905
ENSG00000067798	NAV3	1	6	0.0583429
ENSG00000122012	SV2C	1	6	0.0587848
ENSG00000171988	JMJD1C	1	9	0.0590767
ENSG00000011083	SLC6A7	1	7	0.0595453
ENSG00000168038	ULK4	1	6	0.0595454
ENSG00000136011	STAB2	1	7	0.0597973
ENSG00000184956	MUC6	1	5	0.0605991
ENSG00000071205	ARHGAP10	1	4	0.0607826
ENSG00000140264	SERF2	1	2	0.0611217
ENSG00000196329	GIMAP5	1	2	0.0613217
ENSG00000107249	GLIS3	1	8	0.0614617
ENSG00000122417	ODF2L	1	6	0.0619411
ENSG00000101204	CHRNA4	1	5	0.0619849
ENSG00000052841	TTC17	1	8	0.0620479
ENSG00000072952	IRAG1	1	4	0.0623501
ENSG00000129422	MTUS1	1	6	0.0623872
ENSG00000184144	CNTN2	1	7	0.0624008
ENSG00000154438	ASZ1	1	3	0.0632279
ENSG00000184611	KCNH7	1	2	0.063391
ENSG00000065600	PACC1	1	4	0.0637918
ENSG00000089177	KIF16B	1	9	0.0650834
ENSG00000154556	SORBS2	1	8	0.0651802
ENSG00000171735	CAMTA1	1	9	0.0653777
ENSG00000116698	SMG7	1	7	0.0659179
ENSG00000171444	MCC	1	8	0.0661705
ENSG00000173517	PEAK1	1	8	0.0667322
ENSG00000130396	AFDN	1	9	0.0668466
ENSG00000079739	PGM1	1	5	0.0670274
ENSG00000253537	PCDHGA7	1	3	0.0673049
ENSG00000151718	WWC2	1	9	0.0682478
ENSG00000115850	LCT	1	9	0.0683113
ENSG00000112701	SENP6	1	5	0.0685415
ENSG00000186174	BCL9L	1	4	0.0687517
ENSG00000061987	MON2	1	7	0.0689708
ENSG00000169231	THBS3	1	8	0.0690379
ENSG00000177084	POLE	1	9	0.0695115
ENSG00000102890	ELMO3	1	5	0.0696348
ENSG00000113492	AGXT2	1	4	0.0709851
ENSG00000146426	TIAM2	1	6	0.0712889
ENSG00000132953	XPO4	1	7	0.0716186
ENSG00000070047	PHRF1	1	9	0.0718811
ENSG00000196586	MYO6	1	10	0.07227
ENSG00000006715	VPS41	1	7	0.0722948
ENSG00000138316	ADAMTS14	1	3	0.072936
ENSG00000075826	SEC31B	1	4	0.0742143
ENSG00000198216	CACNA1E	1	10	0.0745005
ENSG00000130158	DOCK6	1	7	0.074514
ENSG00000044524	EPHA3	1	8	0.0745595
ENSG00000074803	SLC12A1	1	7	0.074624
ENSG00000148408	CACNA1B	1	9	0.0751406
ENSG00000204842	ATXN2	1	7	0.0753088
ENSG00000179008	C14orf39	1	3	0.0755468
ENSG00000088387	DOCK9	1	8	0.07555
ENSG00000099139	PCSK5	1	9	0.076267
ENSG00000138035	PNPT1	1	5	0.0769248
ENSG00000165630	PRPF18	1	3	0.0773433
ENSG00000134575	ACP2	1	4	0.0775033
ENSG00000135912	TTLL4	1	9	0.0786586
ENSG00000133858	ZFC3H1	1	7	0.0786837
ENSG00000029639	TFB1M	1	5	0.0799877
ENSG00000141027	NCOR1	1	8	0.0810016
ENSG00000173157	ADAMTS20	1	10	0.0814712
ENSG00000107104	KANK1	1	11	0.0833684
ENSG00000127586	CHTF18	1	4	0.084373
ENSG00000109452	INPP4B	1	5	0.0844381
ENSG00000181333	HEPHL1	1	9	0.0846047
ENSG00000158545	ZC3H18	1	6	0.084849
ENSG00000164176	EDIL3	1	5	0.0857491
ENSG00000197410	DCHS2	1	11	0.085817
ENSG00000102900	NUP93	1	6	0.0887628
ENSG00000156931	VPS8	1	8	0.0898415
ENSG00000165458	INPPL1	1	10	0.0901986
ENSG00000146350	TBC1D32	1	11	0.0905759
ENSG00000144893	MED12L	1	10	0.0907001
ENSG00000169180	XPO6	1	6	0.0910609
ENSG00000143028	SYPL2	0	1	0.0912956
ENSG00000178031	ADAMTSL1	1	10	0.091367
ENSG00000047410	TPR	1	9	0.0914066
ENSG00000152910	CNTNAP4	1	8	0.0919424
ENSG00000116147	TNR	1	10	0.0924106
ENSG00000070371	CLTCL1	1	7	0.0925825
ENSG00000138031	ADCY3	1	9	0.0929859
ENSG00000094914	AAAS	1	7	0.0936049
ENSG00000196305	IARS1	1	6	0.0940119
ENSG00000090924	PLEKHG2	1	5	0.094321
ENSG00000116350	SRSF4	0	1	0.094647
ENSG00000246705	H2AJ	0	1	0.094647
ENSG00000183856	IQGAP3	1	8	0.0948669
ENSG00000163507	CIP2A	1	9	0.0950132
ENSG00000147050	KDM6A	1	5	0.0957943
ENSG00000102001	CACNA1F	1	10	0.0962433
ENSG00000142798	HSPG2	2	28	0.0962479
ENSG00000118898	PPL	1	9	0.0962655
ENSG00000118193	KIF14	1	5	0.0967866
ENSG00000163618	CADPS	1	8	0.0979621
ENSG00000100084	HIRA	1	6	0.100592
ENSG00000101639	CEP192	1	10	0.101316
ENSG00000172059	KLF11	1	6	0.102078
ENSG00000137877	SPTBN5	1	11	0.102963
ENSG00000143382	ADAMTSL4	1	4	0.103859
ENSG00000119397	CNTRL	1	10	0.104302
ENSG00000066279	ASPM	1	7	0.10468
ENSG00000005483	KMT2E	1	12	0.105955
ENSG00000107937	GTPBP4	1	6	0.106482
ENSG00000180530	NRIP1	1	11	0.107459
ENSG00000180113	TDRD6	1	8	0.107765
ENSG00000169398	PTK2	1	11	0.108068
ENSG00000162614	NEXN	0	1	0.108106
ENSG00000158125	XDH	1	6	0.10818
ENSG00000149269	PAK1	0	1	0.10916
ENSG00000012223	LTF	0	1	0.109425
ENSG00000089723	OTUB2	0	1	0.109425
ENSG00000112200	ZNF451	1	7	0.109582
ENSG00000154134	ROBO3	1	8	0.10967
ENSG00000126453	BCL2L12	0	1	0.111635
ENSG00000149926	TLCD3B	0	1	0.111635
ENSG00000166848	TERF2IP	0	1	0.111635
ENSG00000157106	SMG1	1	12	0.112276
ENSG00000164307	ERAP1	1	7	0.112873
ENSG00000182287	AP1S2	0	1	0.113067
ENSG00000144891	AGTR1	0	1	0.113409
ENSG00000188334	BSPH1	0	1	0.113409
ENSG00000184058	TBX1	0	1	0.113558
ENSG00000261796	ISY1-RAB43	0	1	0.113683
ENSG00000035115	SH3YL1	0	1	0.11451
ENSG00000157184	CPT2	0	1	0.11451
ENSG00000010818	HIVEP2	1	9	0.114551
ENSG00000175182	FAM131A	0	1	0.114601
ENSG00000204568	MRPS18B	0	1	0.114601
ENSG00000157240	FZD1	0	1	0.114646
ENSG00000090372	STRN4	0	1	0.114893
ENSG00000065809	FAM107B	0	1	0.115095
ENSG00000164338	UTP15	0	1	0.115095
ENSG00000114650	SCAP	1	12	0.115338
ENSG00000163297	ANTXR2	0	1	0.116408
ENSG00000197487	GALP	0	1	0.116408
ENSG00000152192	POU4F1	0	1	0.116549
ENSG00000162999	DUSP19	0	1	0.116549
ENSG00000132970	WASF3	0	1	0.117258
ENSG00000165029	ABCA1	1	11	0.117587
ENSG00000128908	INO80	1	8	0.117771
ENSG00000040608	RTN4R	0	1	0.118226
ENSG00000113161	HMGCR	0	1	0.118226
ENSG00000103740	ACSBG1	0	1	0.118906
ENSG00000121064	SCPEP1	0	1	0.118906
ENSG00000122566	HNRNPA2B1	0	1	0.118906
ENSG00000162636	FAM102B	0	1	0.118972
ENSG00000255307	OR52B2	0	1	0.118972
ENSG00000127914	AKAP9	1	15	0.118997
ENSG00000171316	CHD7	1	13	0.119132
ENSG00000204703	OR2B3	0	1	0.119466
ENSG00000152463	OLAH	0	1	0.11953
ENSG00000169562	GJB1	0	1	0.11953
ENSG00000198355	PIM3	0	1	0.11995
ENSG00000134313	KIDINS220	1	10	0.120131
ENSG00000178562	CD28	0	1	0.120591
ENSG00000054523	KIF1B	1	12	0.120726
ENSG00000074319	TSG101	0	1	0.121045
ENSG00000128699	ORMDL1	0	1	0.121143
ENSG00000133740	E2F5	0	1	0.121143
ENSG00000175048	ZDHHC14	0	1	0.121143
ENSG00000160145	KALRN	1	12	0.121325
ENSG00000164695	CHMP4C	0	1	0.122348
ENSG00000179055	OR13D1	0	1	0.122348
ENSG00000204435	CSNK2B	0	1	0.122715
ENSG00000066933	MYO9A	1	8	0.123717
ENSG00000173212	MAB21L3	0	1	0.124026
ENSG00000022277	RTF2	0	1	0.124138
ENSG00000104808	DHDH	0	1	0.124138
ENSG00000176302	FOXR1	0	1	0.124138
ENSG00000100722	ZC3H14	0	1	0.12424
ENSG00000161911	TREML1	0	1	0.12424
ENSG00000186283	TOR3A	0	1	0.12454
ENSG00000160298	C21orf58	0	1	0.124628
ENSG00000205403	CFI	0	1	0.124902
ENSG00000124391	IL17C	0	1	0.125126
ENSG00000172818	OVOL1	0	1	0.125126
ENSG00000172824	CES4A	0	1	0.125126
ENSG00000120942	UBIAD1	0	1	0.1252
ENSG00000131730	CKMT2	0	1	0.125298
ENSG00000144668	ITGA9	0	1	0.125298
ENSG00000203685	STUM	0	1	0.125298
ENSG00000162604	TM2D1	0	1	0.125317
ENSG00000115268	RPS15	0	1	0.12547
ENSG00000144815	NXPE3	0	1	0.12547
ENSG00000091010	POU4F3	0	1	0.125545
ENSG00000187942	LDLRAD2	0	1	0.125545
ENSG00000196104	SPOCK3	0	1	0.125545
ENSG00000167258	CDK12	1	9	0.1256
ENSG00000088356	PDRG1	0	1	0.126209
ENSG00000141469	SLC14A1	0	1	0.12624
ENSG00000162980	ARL5A	0	1	0.12624
ENSG00000113327	GABRG2	0	1	0.126595
ENSG00000106178	CCL24	0	1	0.126913
ENSG00000140832	MARVELD3	0	1	0.126913
ENSG00000142507	PSMB6	0	1	0.127078
ENSG00000244537	KRTAP4-2	0	1	0.127078
ENSG00000258818	RNASE4	0	1	0.12714
ENSG00000137073	UBAP2	1	8	0.127212
ENSG00000198105	ZNF248	0	1	0.12727
ENSG00000115306	SPTBN1	1	14	0.127375
ENSG00000232040	ZBED9	1	2	0.127378
ENSG00000139200	PIANP	0	1	0.12776
ENSG00000141639	MAPK4	0	1	0.127953
ENSG00000162576	MXRA8	0	1	0.127953
ENSG00000182362	YBEY	0	1	0.127953
ENSG00000089775	ZBTB25	0	1	0.128063
ENSG00000124251	TP53TG5	0	1	0.128063
ENSG00000137831	UACA	1	11	0.12809
ENSG00000047578	KATNIP	1	4	0.128188
ENSG00000105854	PON2	0	2	0.128272
ENSG00000136457	CHAD	0	1	0.128272
ENSG00000142449	FBN3	1	10	0.128295
ENSG00000116128	BCL9	1	12	0.128595
ENSG00000162139	NEU3	0	1	0.128676
ENSG00000039600	SOX30	0	1	0.128855
ENSG00000187792	ZNF70	0	1	0.128965
ENSG00000104524	PYCR3	0	1	0.129388
ENSG00000132361	CLUH	0	1	0.129482
ENSG00000161203	AP2M1	0	1	0.129482
ENSG00000188324	OR6C6	0	1	0.129482
ENSG00000164074	ABHD18	0	1	0.129515
ENSG00000131043	AAR2	0	1	0.129554
ENSG00000100665	SERPINA4	0	1	0.129852
ENSG00000162664	ZNF326	0	1	0.129852
ENSG00000186818	LILRB4	0	1	0.129852
ENSG00000176024	ZNF613	0	1	0.130004
ENSG00000010278	CD9	0	1	0.130388
ENSG00000121380	BCL2L14	0	1	0.130388
ENSG00000133048	CHI3L1	0	1	0.13051
ENSG00000186407	CD300E	0	1	0.13051
ENSG00000101363	MANBAL	0	1	0.130515
ENSG00000146733	PSPH	0	1	0.130515
ENSG00000204928	GRXCR2	0	1	0.130515
ENSG00000111832	RWDD1	0	1	0.130533
ENSG00000150048	CLEC1A	0	1	0.130533
ENSG00000166153	DEPDC4	0	1	0.130533
ENSG00000130164	LDLR	0	1	0.130597
ENSG00000158445	KCNB1	0	1	0.130597
ENSG00000112977	DAP	0	1	0.130729
ENSG00000166147	FBN1	1	12	0.13079
ENSG00000138642	HERC6	0	1	0.13091
ENSG00000170633	RNF34	0	1	0.131044
ENSG00000182795	C1orf116	0	1	0.131044
ENSG00000137648	TMPRSS4	0	1	0.131124
ENSG00000114062	UBE3A	0	1	0.131229
ENSG00000137100	DCTN3	0	1	0.131363
ENSG00000189376	C8orf76	0	1	0.131363
ENSG00000109265	CRACD	0	1	0.131404
ENSG00000163466	ARPC2	0	1	0.132085
ENSG00000204160	ZDHHC18	0	1	0.132085
ENSG00000109775	UFSP2	0	1	0.132097
ENSG00000159648	TEPP	0	1	0.132097
ENSG00000176895	OR51A7	0	1	0.132097
ENSG00000177294	FBXO39	0	1	0.132097
ENSG00000147853	AK3	0	1	0.132378
ENSG00000116688	MFN2	0	1	0.132676
ENSG00000129235	TXNDC17	0	1	0.132676
ENSG00000182872	RBM10	0	1	0.132676
ENSG00000183160	TMEM119	0	1	0.132676
ENSG00000228716	DHFR	0	1	0.132762
ENSG00000075292	ZNF638	0	1	0.132851
ENSG00000184307	ZDHHC23	0	1	0.13293
ENSG00000213347	MXD3	0	1	0.132959
ENSG00000183814	LIN9	0	1	0.133171
ENSG00000152785	BMP3	0	1	0.133178
ENSG00000154839	SKA1	0	1	0.133178
ENSG00000147394	ZNF185	0	1	0.133474
ENSG00000088053	GP6	0	1	0.133586
ENSG00000135093	USP30	0	1	0.133586
ENSG00000027869	SH2D2A	0	1	0.133798
ENSG00000175895	PLEKHF2	0	1	0.133798
ENSG00000205929	C21orf62	0	1	0.133798
ENSG00000165905	LARGE2	0	1	0.133894
ENSG00000137868	STRA6	0	1	0.13393
ENSG00000171530	TBCA	0	1	0.13393
ENSG00000177830	CHID1	0	1	0.13393
ENSG00000178425	NT5DC1	0	1	0.134055
ENSG00000183111	ARHGEF37	0	1	0.134055
ENSG00000115459	ELMOD3	0	1	0.134254
ENSG00000153086	ACMSD	0	1	0.134254
ENSG00000197363	ZNF517	0	1	0.134254
ENSG00000150628	SPATA4	0	1	0.134258
ENSG00000163218	PGLYRP4	0	1	0.134258
ENSG00000166821	PEX11A	0	1	0.134258
ENSG00000197713	RPE	0	1	0.134258
ENSG00000075399	VPS9D1	0	1	0.134288
ENSG00000176495	OR5AN1	0	1	0.134603
ENSG00000099968	BCL2L13	0	1	0.13463
ENSG00000153234	NR4A2	0	1	0.134659
ENSG00000057608	GDI2	0	1	0.134915
ENSG00000086598	TMED2	0	1	0.134915
ENSG00000120896	SORBS3	0	1	0.134915
ENSG00000132688	NES	0	1	0.13506
ENSG00000176083	ZNF683	0	1	0.135143
ENSG00000154928	EPHB1	1	11	0.13527
ENSG00000100997	ABHD12	0	1	0.135276
ENSG00000112333	NR2E1	0	1	0.135276
ENSG00000165006	UBAP1	0	1	0.135696
ENSG00000102891	MT4	0	1	0.136148
ENSG00000196793	ZNF239	0	1	0.136449
ENSG00000005073	HOXA11	0	1	0.136612
ENSG00000154328	NEIL2	0	1	0.136612
ENSG00000124191	TOX2	0	1	0.136685
ENSG00000125871	MGME1	0	1	0.136685
ENSG00000174574	AKIRIN1	0	1	0.136685
ENSG00000086065	CHMP5	0	1	0.136728
ENSG00000080854	IGSF9B	1	14	0.136776
ENSG00000117505	DR1	0	1	0.136881
ENSG00000179604	CDC42EP4	0	1	0.136881
ENSG00000126001	CEP250	1	12	0.1373
ENSG00000134955	SLC37A2	0	1	0.137348
ENSG00000166923	GREM1	0	1	0.137348
ENSG00000211584	SLC48A1	0	1	0.137393
ENSG00000134058	CDK7	0	1	0.137421
ENSG00000170166	HOXD4	0	1	0.137563
ENSG00000173918	C1QTNF1	0	1	0.137844
ENSG00000100362	PVALB	0	1	0.137948
ENSG00000100211	CBY1	0	1	0.138052
ENSG00000135625	EGR4	0	1	0.138052
ENSG00000143776	CDC42BPA	1	8	0.138062
ENSG00000117481	NSUN4	0	1	0.13811
ENSG00000137496	IL18BP	0	1	0.138258
ENSG00000159884	CCDC107	0	1	0.138266
ENSG00000092036	HAUS4	0	1	0.138268
ENSG00000101846	STS	0	1	0.138268
ENSG00000018610	STEEP1	0	1	0.138424
ENSG00000121361	KCNJ8	0	1	0.138437
ENSG00000151014	NOCT	0	1	0.138437
ENSG00000103264	FBXO31	0	1	0.13853
ENSG00000116213	WRAP73	0	1	0.13853
ENSG00000126950	TMEM35A	0	1	0.13853
ENSG00000175395	ZNF25	0	1	0.13853
ENSG00000134243	SORT1	0	1	0.138543
ENSG00000160219	GAB3	0	1	0.138543
ENSG00000196505	GDAP2	0	1	0.138543
ENSG00000110987	BCL7A	0	1	0.138673
ENSG00000127564	PKMYT1	0	1	0.138673
ENSG00000170959	DCDC1	0	1	0.138897
ENSG00000136280	CCM2	0	1	0.139142
ENSG00000198056	PRIM1	0	1	0.139284
ENSG00000109814	UGDH	1	6	0.139382
ENSG00000090857	PDPR	0	1	0.139458
ENSG00000115523	GNLY	0	1	0.139707
ENSG00000140623	SEPTIN12	0	1	0.139735
ENSG00000167671	UBXN6	0	1	0.139735
ENSG00000138621	PPCDC	0	1	0.139769
ENSG00000151117	TMEM86A	0	1	0.139769
ENSG00000152683	SLC30A6	0	1	0.139908
ENSG00000150873	C2orf50	0	2	0.139923
ENSG00000029153	ARNTL2	0	1	0.139948
ENSG00000120217	CD274	0	1	0.139948
ENSG00000111450	STX2	0	1	0.139966
ENSG00000197272	IL27	0	1	0.139966
ENSG00000137094	DNAJB5	0	1	0.140075
ENSG00000137507	LRRC32	0	1	0.140075
ENSG00000184672	RALYL	0	1	0.140075
ENSG00000234224	TMEM229A	0	1	0.140075
ENSG00000136758	YME1L1	0	1	0.140158
ENSG00000171208	NETO2	0	1	0.140158
ENSG00000177150	FAM210A	0	1	0.140158
ENSG00000149133	OR5F1	0	1	0.140422
ENSG00000169991	IFFO2	0	1	0.140813
ENSG00000078369	GNB1	0	1	0.140949
ENSG00000174899	SLC66A1L	0	1	0.141033
ENSG00000004799	PDK4	0	1	0.141079
ENSG00000166311	SMPD1	0	1	0.141079
ENSG00000159905	ZNF221	0	1	0.1411
ENSG00000184076	UQCR10	0	1	0.141252
ENSG00000142784	WDTC1	0	1	0.141379
ENSG00000154415	PPP1R3A	0	1	0.141379
ENSG00000179144	GIMAP7	0	1	0.141379
ENSG00000160310	PRMT2	0	1	0.141449
ENSG00000159069	FBXW5	0	1	0.141531
ENSG00000094755	GABRP	0	1	0.141693
ENSG00000127990	SGCE	0	1	0.141842
ENSG00000185862	EVI2B	0	1	0.141842
ENSG00000123684	LPGAT1	0	1	0.141976
ENSG00000137757	CASP5	0	1	0.141976
ENSG00000197937	ZNF347	0	1	0.141976
ENSG00000170091	NSG2	0	1	0.142022
ENSG00000177558	FAM187B	0	1	0.142022
ENSG00000222018	FAM243A	0	1	0.142022
ENSG00000164919	COX6C	0	1	0.142114
ENSG00000188394	GPR21	0	1	0.142114
ENSG00000106459	NRF1	0	1	0.142304
ENSG00000177752	YIPF7	0	1	0.142304
ENSG00000154582	ELOC	0	1	0.142325
ENSG00000171004	HS6ST2	0	1	0.142325
ENSG00000112149	CD83	0	1	0.142375
ENSG00000175155	YPEL2	0	1	0.142375
ENSG00000086619	ERO1B	0	1	0.142493
ENSG00000106009	BRAT1	0	1	0.142493
ENSG00000136167	LCP1	0	1	0.142493
ENSG00000196597	ZNF782	0	1	0.142493
ENSG00000183020	AP2A2	0	1	0.142734
ENSG00000197885	NKIRAS1	0	1	0.142734
ENSG00000135932	CAB39	0	1	0.142845
ENSG00000140284	SLC27A2	0	1	0.142845
ENSG00000148798	INA	0	1	0.143057
ENSG00000124575	H1-3	0	1	0.143308
ENSG00000155111	CDK19	0	1	0.143308
ENSG00000162496	DHRS3	0	1	0.143337
ENSG00000163746	PLSCR2	0	1	0.143337
ENSG00000162444	RBP7	0	1	0.143399
ENSG00000241343	RPL36A	0	1	0.143606
ENSG00000181273	OR5AK2	0	1	0.143609
ENSG00000054116	TRAPPC3	0	1	0.143986
ENSG00000142751	GPN2	0	1	0.14405
ENSG00000179085	DPM3	0	1	0.14405
ENSG00000049618	ARID1B	1	11	0.144149
ENSG00000181619	GPR135	0	1	0.14415
ENSG00000188909	BSX	0	1	0.14415
ENSG00000104695	PPP2CB	0	1	0.144238
ENSG00000167508	MVD	0	1	0.144238
ENSG00000214107	MAGEB1	0	1	0.144238
ENSG00000130755	GMFG	0	1	0.144292
ENSG00000177200	CHD9	1	10	0.144421
ENSG00000111554	MDM1	0	1	0.144444
ENSG00000131188	PRR7	0	1	0.144444
ENSG00000148516	ZEB1	0	1	0.144444
ENSG00000186952	TMEM232	0	1	0.144444
ENSG00000081307	UBA5	0	1	0.144675
ENSG00000131508	UBE2D2	0	1	0.144675
ENSG00000166927	MS4A7	0	1	0.144675
ENSG00000135698	MPHOSPH6	0	1	0.144827
ENSG00000185585	OLFML2A	0	1	0.144827
ENSG00000115808	STRN	0	1	0.144909
ENSG00000168116	KIAA1586	0	1	0.144909
ENSG00000099822	HCN2	0	1	0.144934
ENSG00000168078	PBK	0	1	0.145023
ENSG00000186891	TNFRSF18	0	1	0.145023
ENSG00000105427	CNFN	0	1	0.145057
ENSG00000177426	TGIF1	0	1	0.145057
ENSG00000182793	GSTA5	0	1	0.145057
ENSG00000183715	OPCML	0	1	0.145057
ENSG00000092841	MYL6	0	1	0.145057
ENSG00000103152	MPG	0	1	0.145057
ENSG00000092470	WDR76	0	1	0.145165
ENSG00000006047	YBX2	0	1	0.145212
ENSG00000169413	RNASE6	0	1	0.145212
ENSG00000188269	OR7A5	0	1	0.145212
ENSG00000109466	KLHL2	0	1	0.145286
ENSG00000114796	KLHL24	0	1	0.145286
ENSG00000155304	HSPA13	0	1	0.145286
ENSG00000112715	VEGFA	0	1	0.145314
ENSG00000115109	EPB41L5	0	1	0.145403
ENSG00000135902	CHRND	0	1	0.145403
ENSG00000163430	FSTL1	0	1	0.145733
ENSG00000179059	ZFP42	0	1	0.145763
ENSG00000124827	GCM2	0	1	0.14591
ENSG00000167858	TEKT1	0	1	0.14591
ENSG00000172538	FAM170B	0	1	0.14591
ENSG00000126091	ST3GAL3	0	1	0.146072
ENSG00000165819	METTL3	0	1	0.146081
ENSG00000235109	ZSCAN31	0	1	0.146081
ENSG00000128510	CPA4	0	1	0.146278
ENSG00000170017	ALCAM	0	1	0.146278
ENSG00000170044	ZPLD1	0	1	0.14629
ENSG00000087258	GNAO1	0	1	0.146305
ENSG00000101367	MAPRE1	0	1	0.146305
ENSG00000172146	OR1A1	0	1	0.146305
ENSG00000135338	LCA5	0	1	0.146316
ENSG00000137207	YIPF3	0	1	0.146316
ENSG00000148339	SLC25A25	0	1	0.146316
ENSG00000197706	OR6C74	0	1	0.146316
ENSG00000110711	AIP	0	1	0.146384
ENSG00000197921	HES5	0	1	0.146384
ENSG00000074317	SNCB	0	1	0.146427
ENSG00000131116	ZNF428	0	1	0.146427
ENSG00000168454	TXNDC2	0	1	0.146427
ENSG00000182272	B4GALNT4	0	1	0.146427
ENSG00000047644	WWC3	0	1	0.14684
ENSG00000173928	SWSAP1	0	1	0.14684
ENSG00000107159	CA9	0	1	0.146869
ENSG00000121634	GJA8	0	1	0.147233
ENSG00000141425	RPRD1A	0	1	0.147477
ENSG00000115159	GPD2	0	1	0.147566
ENSG00000160321	ZNF208	0	1	0.147566
ENSG00000177694	NAALADL2	0	1	0.147566
ENSG00000078579	FGF20	0	1	0.147663
ENSG00000138767	CNOT6L	0	1	0.147663
ENSG00000155729	KCTD18	0	1	0.147963
ENSG00000178913	TAF7	0	1	0.147963
ENSG00000197329	PELI1	0	1	0.14798
ENSG00000229809	ZNF688	0	1	0.148017
ENSG00000102174	PHEX	0	1	0.148072
ENSG00000251503	CENPS-CORT	0	1	0.148072
ENSG00000078747	ITCH	0	1	0.148234
ENSG00000086232	EIF2AK1	0	2	0.148234
ENSG00000152229	PSTPIP2	0	1	0.148234
ENSG00000181016	LSMEM1	0	1	0.148234
ENSG00000157045	NTAN1	0	1	0.148433
ENSG00000101189	MRGBP	0	1	0.148497
ENSG00000161055	SCGB3A1	0	1	0.148497
ENSG00000111145	ELK3	0	1	0.148518
ENSG00000147526	TACC1	0	1	0.148518
ENSG00000179151	EDC3	0	1	0.148518
ENSG00000186409	CCDC30	0	1	0.148518
ENSG00000102781	KATNAL1	0	1	0.14859
ENSG00000133246	PRAM1	0	1	0.14859
ENSG00000092009	CMA1	0	1	0.14884
ENSG00000141446	ESCO1	0	1	0.14884
ENSG00000152315	KCNK13	0	1	0.14884
ENSG00000116586	LAMTOR2	0	1	0.148849
ENSG00000133247	KMT5C	0	1	0.148849
ENSG00000158201	ABHD3	0	1	0.148849
ENSG00000163682	RPL9	0	1	0.148849
ENSG00000171103	TRMT61B	0	1	0.148849
ENSG00000187997	C17orf99	0	1	0.148849
ENSG00000115290	GRB14	0	1	0.148904
ENSG00000168884	TNIP2	0	1	0.148904
ENSG00000170484	KRT74	0	1	0.148904
ENSG00000204310	AGPAT1	0	1	0.148904
ENSG00000144228	SPOPL	0	1	0.148919
ENSG00000072756	TRNT1	0	1	0.148937
ENSG00000168685	IL7R	0	1	0.148937
ENSG00000176973	FAM89B	0	1	0.148937
ENSG00000157219	HTR5A	0	1	0.148987
ENSG00000165246	NLGN4Y	0	1	0.148987
ENSG00000113194	FAF2	0	1	0.149033
ENSG00000142512	SIGLEC10	0	1	0.149129
ENSG00000172943	PHF8	0	1	0.149129
ENSG00000156103	MMP16	0	1	0.149285
ENSG00000156206	CFAP161	0	1	0.149378
ENSG00000139648	KRT71	0	1	0.149411
ENSG00000186687	LYRM7	0	1	0.149411
ENSG00000077935	SMC1B	0	1	0.149425
ENSG00000076662	ICAM3	0	1	0.149627
ENSG00000115524	SF3B1	0	1	0.149627
ENSG00000101216	GMEB2	0	1	0.149651
ENSG00000126698	DNAJC8	0	1	0.149651
ENSG00000084207	GSTP1	0	1	0.149788
ENSG00000166225	FRS2	0	1	0.149788
ENSG00000172421	EFCAB3	0	1	0.149788
ENSG00000187616	MYMK	0	1	0.149788
ENSG00000204947	ZNF425	0	1	0.149826
ENSG00000123485	HJURP	0	1	0.149891
ENSG00000156381	ANKRD9	0	1	0.149891
ENSG00000155833	CYLC2	0	1	0.149893
ENSG00000148229	POLE3	0	1	0.149965
ENSG00000100601	ALKBH1	0	1	0.149985
ENSG00000162599	NFIA	0	1	0.149985
ENSG00000259399	TGIF2-RAB5IF	0	1	0.14999
ENSG00000007944	MYLIP	0	1	0.150019
ENSG00000120256	LRP11	0	1	0.150019
ENSG00000163075	CFAP221	0	1	0.150019
ENSG00000169248	CXCL11	0	1	0.150019
ENSG00000100577	GSTZ1	0	1	0.150139
ENSG00000132781	MUTYH	0	1	0.150139
ENSG00000182256	GABRG3	0	2	0.150144
ENSG00000184260	H2AC20	0	1	0.150223
ENSG00000179954	SSC5D	0	1	0.150243
ENSG00000187758	ADH1A	0	1	0.150252
ENSG00000115194	SLC30A3	0	1	0.150423
ENSG00000151923	TIAL1	0	1	0.150423
ENSG00000080815	PSEN1	0	1	0.150657
ENSG00000120160	EQTN	0	1	0.150657
ENSG00000179388	EGR3	0	1	0.150657
ENSG00000162494	LRRC38	0	1	0.150676
ENSG00000213139	CRYGS	0	1	0.150676
ENSG00000172817	CYP7B1	0	1	0.150706
ENSG00000204482	LST1	0	1	0.150706
ENSG00000173991	TCAP	0	1	0.150711
ENSG00000157017	GHRL	0	1	0.150745
ENSG00000168899	VAMP5	0	1	0.150745
ENSG00000183520	UTP11	0	1	0.150745
ENSG00000117280	RAB29	0	1	0.150796
ENSG00000151287	TEX30	0	1	0.150796
ENSG00000181001	OR52N1	0	1	0.150796
ENSG00000053702	NRIP2	0	1	0.151091
ENSG00000118058	KMT2A	1	12	0.151321
ENSG00000221994	ZNF630	0	1	0.151338
ENSG00000197208	SLC22A4	0	1	0.151419
ENSG00000152592	DMP1	0	1	0.151496
ENSG00000174238	PITPNA	0	1	0.151592
ENSG00000101152	DNAJC5	0	1	0.151665
ENSG00000177791	MYOZ1	0	1	0.15167
ENSG00000186815	TPCN1	0	1	0.15167
ENSG00000105509	HAS1	0	1	0.151786
ENSG00000112062	MAPK14	0	1	0.151786
ENSG00000100888	CHD8	1	14	0.151829
ENSG00000142541	RPL13A	0	1	0.151905
ENSG00000114353	GNAI2	0	1	0.151931
ENSG00000041802	LSG1	0	1	0.151955
ENSG00000178694	NSUN3	0	1	0.151955
ENSG00000188021	UBQLN2	0	1	0.151992
ENSG00000070010	UFD1	0	1	0.152129
ENSG00000140987	ZSCAN32	0	1	0.152129
ENSG00000156603	MED19	0	1	0.152129
ENSG00000168267	PTF1A	0	1	0.152129
ENSG00000006634	DBF4	0	1	0.152373
ENSG00000198576	ARC	0	1	0.152373
ENSG00000109534	GAR1	0	1	0.152393
ENSG00000148377	IDI2	0	1	0.152393
ENSG00000136867	SLC31A2	0	1	0.152694
ENSG00000175213	ZNF408	0	1	0.152694
ENSG00000047648	ARHGAP6	0	1	0.152704
ENSG00000139597	N4BP2L1	0	1	0.152704
ENSG00000163576	EFHB	0	1	0.152704
ENSG00000117533	VAMP4	0	1	0.152747
ENSG00000119396	RAB14	0	1	0.152858
ENSG00000138109	CYP2C9	0	1	0.152858
ENSG00000166188	ZNF319	0	1	0.152858
ENSG00000170950	PGK2	0	1	0.152858
ENSG00000167131	CCDC103	0	1	0.152862
ENSG00000198883	PNMA5	0	1	0.152862
ENSG00000170921	TANC2	1	16	0.152909
ENSG00000112902	SEMA5A	0	1	0.153102
ENSG00000148120	AOPEP	0	1	0.153102
ENSG00000176244	ACBD7	0	1	0.153102
ENSG00000135299	ANKRD6	0	1	0.153193
ENSG00000154721	JAM2	0	1	0.153193
ENSG00000241837	ATP5PO	0	1	0.153193
ENSG00000159063	ALG8	0	1	0.153218
ENSG00000174529	TMEM81	0	1	0.153218
ENSG00000183801	OLFML1	0	1	0.153218
ENSG00000100532	CGRRF1	0	1	0.153557
ENSG00000124564	SLC17A3	0	1	0.153896
ENSG00000167332	OR51E2	0	1	0.153896
ENSG00000204228	HSD17B8	0	1	0.153896
ENSG00000243489	KRTAP10-11	0	1	0.153896
ENSG00000119559	C19orf25	0	1	0.154106
ENSG00000172548	NIPAL4	0	1	0.154106
ENSG00000100372	SLC25A17	0	1	0.154261
ENSG00000011198	ABHD5	0	1	0.154305
ENSG00000028277	POU2F2	0	1	0.15432
ENSG00000109471	IL2	0	1	0.15432
ENSG00000164303	ENPP6	0	1	0.15432
ENSG00000109654	TRIM2	0	1	0.154344
ENSG00000137707	BTG4	0	1	0.154344
ENSG00000154814	OXNAD1	0	1	0.154374
ENSG00000182950	ODF3L1	0	1	0.154383
ENSG00000075336	TIMM21	0	1	0.154498
ENSG00000160201	U2AF1	0	1	0.154498
ENSG00000169181	GSG1L	0	1	0.154569
ENSG00000213762	ZNF134	0	1	0.154576
ENSG00000064763	FAR2	0	1	0.154647
ENSG00000064787	BCAS1	0	1	0.154647
ENSG00000112651	MRPL2	0	1	0.154647
ENSG00000117632	STMN1	0	1	0.154647
ENSG00000143320	CRABP2	0	1	0.154705
ENSG00000196072	BLOC1S2	0	1	0.154705
ENSG00000162144	CYB561A3	0	1	0.154716
ENSG00000107485	GATA3	0	1	0.154792
ENSG00000118785	SPP1	0	1	0.154792
ENSG00000126368	NR1D1	0	1	0.154819
ENSG00000171174	RBKS	0	1	0.154819
ENSG00000124678	TCP11	0	1	0.154852
ENSG00000197472	ZNF695	0	1	0.154866
ENSG00000055211	GINM1	0	1	0.154956
ENSG00000180919	OR56B4	0	1	0.154956
ENSG00000100033	PRODH	0	1	0.155051
ENSG00000168993	CPLX1	0	1	0.155051
ENSG00000140015	KCNH5	0	1	0.155093
ENSG00000156017	CARNMT1	0	1	0.155093
ENSG00000221821	C6orf226	0	1	0.155093
ENSG00000135776	ABCB10	0	1	0.155125
ENSG00000137875	BCL2L10	0	1	0.155125
ENSG00000064995	TAF11	0	1	0.155125
ENSG00000169962	TAS1R3	0	1	0.155125
ENSG00000074842	MYDGF	0	1	0.155148
ENSG00000204070	SYS1	0	1	0.155148
ENSG00000186625	KATNA1	0	1	0.155184
ENSG00000187258	NPSR1	0	1	0.155184
ENSG00000137288	UQCC2	0	1	0.155265
ENSG00000183161	FANCF	0	1	0.155323
ENSG00000204257	HLA-DMA	0	1	0.155323
ENSG00000108551	RASD1	0	1	0.155346
ENSG00000143363	PRUNE1	0	1	0.155437
ENSG00000168907	PLA2G4F	0	1	0.155526
ENSG00000113083	LOX	0	1	0.155527
ENSG00000128917	DLL4	0	1	0.155527
ENSG00000165416	SUGT1	0	1	0.155527
ENSG00000173559	NABP1	0	1	0.155527
ENSG00000158435	CNOT11	0	1	0.155598
ENSG00000112146	FBXO9	0	1	0.155653
ENSG00000136144	RCBTB1	0	1	0.155653
ENSG00000204392	LSM2	0	1	0.155662
ENSG00000182107	TMEM30B	0	1	0.155697
ENSG00000101198	NKAIN4	0	1	0.155701
ENSG00000106128	GHRHR	0	1	0.155938
ENSG00000189334	S100A14	0	1	0.155938
ENSG00000203972	GLYATL3	0	1	0.155938
ENSG00000101049	SGK2	0	1	0.156065
ENSG00000121058	COIL	0	1	0.156065
ENSG00000156026	MCU	0	1	0.156065
ENSG00000196405	EVL	0	1	0.156065
ENSG00000198513	ATL1	0	1	0.156089
ENSG00000176177	ENTHD1	0	1	0.156121
ENSG00000101417	PXMP4	0	1	0.156126
ENSG00000070495	JMJD6	0	1	0.156151
ENSG00000099899	TRMT2A	0	1	0.156178
ENSG00000154188	ANGPT1	0	1	0.156178
ENSG00000171992	SYNPO	0	1	0.156178
ENSG00000166924	NYAP1	0	1	0.156185
ENSG00000149179	C11orf49	0	1	0.156223
ENSG00000167842	MIS12	0	1	0.156356
ENSG00000196248	OR10S1	0	1	0.156369
ENSG00000121207	LRAT	0	1	0.15663
ENSG00000138686	BBS7	0	1	0.15663
ENSG00000140259	MFAP1	0	1	0.156695
ENSG00000197381	ADARB1	0	1	0.156695
ENSG00000168952	STXBP6	0	1	0.156712
ENSG00000136630	HLX	0	1	0.156728
ENSG00000162931	TRIM17	0	1	0.156728
ENSG00000198271	KRTAP4-5	0	1	0.156728
ENSG00000138180	CEP55	0	1	0.156868
ENSG00000159199	ATP5MC1	0	1	0.156955
ENSG00000198046	ZNF667	0	1	0.156955
ENSG00000221996	OR52B4	0	1	0.156955
ENSG00000262209	PCDHGB3	0	1	0.156955
ENSG00000129566	TEP1	1	9	0.156989
ENSG00000183864	TOB2	0	1	0.157011
ENSG00000197992	CLEC9A	0	1	0.157011
ENSG00000173699	SPATA3	0	1	0.157244
ENSG00000198015	MRPL42	0	1	0.157244
ENSG00000198298	ZNF485	0	1	0.157244
ENSG00000115956	PLEK	0	1	0.157308
ENSG00000124134	KCNS1	0	1	0.157308
ENSG00000127252	PLAAT1	0	1	0.157406
ENSG00000103495	MAZ	0	1	0.157424
ENSG00000112685	EXOC2	0	1	0.157424
ENSG00000124228	DDX27	0	1	0.157424
ENSG00000213523	SRA1	0	1	0.157424
ENSG00000162517	PEF1	0	1	0.157639
ENSG00000188001	TPRG1	0	1	0.157639
ENSG00000223609	HBD	0	1	0.157639
ENSG00000151876	FBXO4	0	1	0.157649
ENSG00000197324	LRP10	0	1	0.157649
ENSG00000106631	MYL7	0	1	0.157819
ENSG00000175274	TP53I11	0	1	0.157837
ENSG00000179889	PDXDC1	0	1	0.157837
ENSG00000198964	SGMS1	0	1	0.157872
ENSG00000157851	DPYSL5	0	1	0.157881
ENSG00000172301	COPRS	0	1	0.157881
ENSG00000001561	ENPP4	0	1	0.157927
ENSG00000196510	ANAPC7	0	1	0.157927
ENSG00000100385	IL2RB	0	1	0.157929
ENSG00000158234	FAIM	0	1	0.157929
ENSG00000104324	CPQ	0	1	0.157981
ENSG00000150261	OR8K1	0	1	0.157981
ENSG00000173805	HAP1	0	1	0.157981
ENSG00000177947	ODF3	0	1	0.157981
ENSG00000070761	CFAP20	0	1	0.157991
ENSG00000174948	GPR149	0	1	0.157991
ENSG00000096063	SRPK1	0	1	0.158023
ENSG00000185896	LAMP1	0	1	0.158023
ENSG00000113719	ERGIC1	0	1	0.158057
ENSG00000165804	ZNF219	0	1	0.158057
ENSG00000235711	ANKRD34C	0	1	0.158057
ENSG00000102554	KLF5	0	1	0.158066
ENSG00000156689	GLYATL2	0	1	0.158066
ENSG00000233276	GPX1	0	1	0.158082
ENSG00000253710	ALG11	0	1	0.158082
ENSG00000166171	DPCD	0	1	0.158155
ENSG00000106077	ABHD11	0	1	0.158225
ENSG00000060709	RIMBP2	0	1	0.158298
ENSG00000157593	SLC35B2	0	1	0.158356
ENSG00000130830	MPP1	0	1	0.158365
ENSG00000176256	HMGB4	0	1	0.158365
ENSG00000146670	CDCA5	0	1	0.158397
ENSG00000156886	ITGAD	0	1	0.158397
ENSG00000076716	GPC4	0	1	0.158496
ENSG00000110881	ASIC1	0	1	0.158507
ENSG00000162817	C1orf115	0	1	0.158507
ENSG00000177354	C10orf71	0	1	0.158507
ENSG00000076242	MLH1	0	1	0.158555
ENSG00000099812	MISP	0	1	0.158575
ENSG00000115488	NEU2	0	1	0.158575
ENSG00000213563	C8orf82	0	1	0.158581
ENSG00000158806	NPM2	0	1	0.158586
ENSG00000185024	BRF1	0	1	0.158586
ENSG00000162711	NLRP3	0	1	0.15863
ENSG00000197008	ZNF138	0	1	0.15863
ENSG00000136240	KDELR2	0	1	0.158703
ENSG00000146250	PRSS35	0	1	0.158703
ENSG00000166091	CMTM5	0	1	0.158703
ENSG00000173809	TDRD12	0	1	0.158703
ENSG00000109758	HGFAC	0	1	0.158735
ENSG00000141744	PNMT	0	1	0.158735
ENSG00000099817	POLR2E	0	1	0.158736
ENSG00000130005	GAMT	0	1	0.158736
ENSG00000120329	SLC25A2	0	1	0.15874
ENSG00000143258	USP21	0	1	0.158775
ENSG00000143179	UCK2	0	1	0.158783
ENSG00000171505	OR1N1	0	1	0.158783
ENSG00000165694	FRMD7	0	1	0.158823
ENSG00000125354	SEPTIN6	0	1	0.158847
ENSG00000109272	PF4V1	0	1	0.158917
ENSG00000114279	FGF12	0	1	0.158944
ENSG00000171161	ZNF672	0	1	0.158944
ENSG00000136425	CIB2	0	1	0.158985
ENSG00000227268	KLLN	0	1	0.158985
ENSG00000078900	TP73	0	1	0.159026
ENSG00000133019	CHRM3	0	1	0.159026
ENSG00000141968	VAV1	0	1	0.159026
ENSG00000241644	INMT	0	1	0.159026
ENSG00000254737	OR10G4	0	1	0.159026
ENSG00000197780	TAF13	0	1	0.159105
ENSG00000215883	CYB5RL	0	1	0.159105
ENSG00000126790	L3HYPDH	0	1	0.159366
ENSG00000135773	CAPN9	0	1	0.159366
ENSG00000139291	TMEM19	0	1	0.159429
ENSG00000153551	CMTM7	0	1	0.159599
ENSG00000015592	STMN4	0	1	0.159703
ENSG00000116668	SWT1	0	1	0.159703
ENSG00000113761	ZNF346	0	1	0.159769
ENSG00000135094	SDS	0	1	0.159769
ENSG00000143520	FLG2	0	1	0.159769
ENSG00000178015	GPR150	0	1	0.159769
ENSG00000188766	SPRED3	0	1	0.159769
ENSG00000176769	TCERG1L	0	1	0.159801
ENSG00000016082	ISL1	0	1	0.159885
ENSG00000081189	MEF2C	0	1	0.159885
ENSG00000114999	TTL	0	1	0.159885
ENSG00000165169	DYNLT3	0	1	0.159885
ENSG00000196867	ZFP28	0	1	0.159885
ENSG00000112511	PHF1	0	1	0.159959
ENSG00000144021	CIAO1	0	1	0.159959
ENSG00000151917	BEND6	0	1	0.159959
ENSG00000166012	TAF1D	0	1	0.159959
ENSG00000169840	GSX1	0	1	0.159959
ENSG00000179914	ITLN1	0	1	0.159959
ENSG00000117013	KCNQ4	0	1	0.160042
ENSG00000183775	KCTD16	0	1	0.160084
ENSG00000204866	IGFL2	0	1	0.160084
ENSG00000173988	LRRC63	0	2	0.1601
ENSG00000109805	NCAPG	0	1	0.160158
ENSG00000105954	NPVF	0	1	0.160179
ENSG00000132554	RGS22	0	1	0.160179
ENSG00000168350	DEGS2	0	1	0.160179
ENSG00000183513	COA5	0	1	0.160179
ENSG00000162399	BSND	0	1	0.160204
ENSG00000067836	ROGDI	0	1	0.160222
ENSG00000185745	IFIT1	0	1	0.160297
ENSG00000132603	NIP7	0	1	0.160299
ENSG00000036530	CYP46A1	0	1	0.160444
ENSG00000110697	PITPNM1	0	1	0.160445
ENSG00000196156	KRTAP4-3	0	1	0.160445
ENSG00000054803	CBLN4	0	1	0.160471
ENSG00000180785	OR51E1	0	1	0.16054
ENSG00000188505	NCCRP1	0	1	0.160619
ENSG00000141194	OR4D1	0	1	0.160647
ENSG00000115514	TXNDC9	0	1	0.16073
ENSG00000174844	DNAH12	0	1	0.16073
ENSG00000182185	RAD51B	0	1	0.16073
ENSG00000142959	BEST4	0	1	0.160758
ENSG00000110887	DAO	0	1	0.160829
ENSG00000117597	UTP25	0	1	0.160839
ENSG00000121743	GJA3	0	1	0.160839
ENSG00000153395	LPCAT1	0	1	0.160854
ENSG00000172215	CXCR6	0	1	0.160854
ENSG00000151729	SLC25A4	0	1	0.160872
ENSG00000187033	SAMD7	0	1	0.160872
ENSG00000129680	MAP7D3	0	1	0.161174
ENSG00000169905	TOR1AIP2	0	1	0.161174
ENSG00000087074	PPP1R15A	0	1	0.161176
ENSG00000172572	PDE3A	0	1	0.161176
ENSG00000188313	PLSCR1	0	1	0.161176
ENSG00000101447	FAM83D	0	1	0.161189
ENSG00000132881	CPLANE2	0	1	0.161189
ENSG00000137731	FXYD2	0	1	0.16126
ENSG00000143498	TAF1A	0	2	0.16126
ENSG00000205795	CYS1	0	1	0.16126
ENSG00000004478	FKBP4	0	1	0.161349
ENSG00000175305	CCNE2	0	1	0.161369
ENSG00000131269	ABCB7	0	1	0.161399
ENSG00000143811	PYCR2	0	1	0.161399
ENSG00000155542	SETD9	0	1	0.161399
ENSG00000110768	GTF2H1	0	1	0.161399
ENSG00000196428	TSC22D2	0	1	0.161403
ENSG00000112378	PERP	0	1	0.161428
ENSG00000163288	GABRB1	0	1	0.161428
ENSG00000174279	EVX2	0	1	0.161516
ENSG00000187013	LINC02875	0	1	0.161516
ENSG00000148832	PAOX	0	1	0.161541
ENSG00000188747	NOXA1	0	1	0.161541
ENSG00000169813	HNRNPF	0	1	0.161565
ENSG00000104886	PLEKHJ1	0	1	0.161612
ENSG00000078589	P2RY10	0	1	0.161707
ENSG00000131323	TRAF3	0	1	0.161707
ENSG00000135124	P2RX4	0	1	0.161759
ENSG00000168818	STX18	0	1	0.161796
ENSG00000181392	SYNE4	0	1	0.161796
ENSG00000198189	HSD17B11	0	1	0.161796
ENSG00000105173	CCNE1	0	2	0.161799
ENSG00000124731	TREM1	0	1	0.161832
ENSG00000162510	MATN1	0	1	0.161832
ENSG00000099785	MARCHF2	0	1	0.161886
ENSG00000169826	CSGALNACT2	0	1	0.161886
ENSG00000204397	CARD16	0	1	0.161908
ENSG00000058453	CROCC	0	1	0.161965
ENSG00000197045	GMFB	0	1	0.161965
ENSG00000223547	ZNF844	0	1	0.161978
ENSG00000198643	FAM3D	0	1	0.162013
ENSG00000085733	CTTN	0	1	0.162106
ENSG00000146151	HMGCLL1	0	1	0.162106
ENSG00000260230	FRRS1L	0	1	0.162153
ENSG00000163072	NOSTRIN	0	1	0.162169
ENSG00000152601	MBNL1	0	1	0.1622
ENSG00000048740	CELF2	0	1	0.162302
ENSG00000103415	HMOX2	0	1	0.162302
ENSG00000186897	C1QL4	0	1	0.162302
ENSG00000188167	TMPPE	0	1	0.162334
ENSG00000171223	JUNB	0	1	0.162358
ENSG00000147138	GPR174	0	1	0.162598
ENSG00000173915	ATP5MK	0	1	0.162598
ENSG00000140350	ANP32A	0	1	0.162623
ENSG00000180479	ZNF571	0	1	0.162708
ENSG00000181396	OGFOD3	0	1	0.162708
ENSG00000135119	RNFT2	0	1	0.16271
ENSG00000130713	EXOSC2	0	1	0.16277
ENSG00000198947	DMD	1	16	0.162812
ENSG00000127419	TMEM175	0	1	0.162816
ENSG00000185681	MORN5	0	1	0.162953
ENSG00000155265	GOLGA7B	0	1	0.162954
ENSG00000188783	PRELP	0	1	0.163126
ENSG00000114113	RBP2	0	1	0.163171
ENSG00000184478	OR56A3	0	1	0.163171
ENSG00000196872	CRACDL	0	1	0.163171
ENSG00000196357	ZNF565	0	1	0.1632
ENSG00000112303	VNN2	0	1	0.16335
ENSG00000187166	H1-7	0	1	0.16335
ENSG00000162367	TAL1	0	1	0.163451
ENSG00000164916	FOXK1	0	1	0.163451
ENSG00000177489	OR2G2	0	1	0.163451
ENSG00000172154	OR8I2	0	1	0.163603
ENSG00000115844	DLX2	0	1	0.163609
ENSG00000157782	CABP1	0	1	0.163637
ENSG00000163499	CRYBA2	0	1	0.163637
ENSG00000119403	PHF19	0	1	0.163659
ENSG00000147036	LANCL3	0	1	0.163659
ENSG00000136100	VPS36	0	1	0.163663
ENSG00000221923	ZNF880	0	1	0.163663
ENSG00000155714	PDZD9	0	1	0.163744
ENSG00000067715	SYT1	0	1	0.163752
ENSG00000116120	FARSB	0	1	0.163753
ENSG00000176597	B3GNT5	0	1	0.163757
ENSG00000184508	HDDC3	0	1	0.163766
ENSG00000067225	PKM	0	1	0.163776
ENSG00000111405	ENDOU	0	1	0.163776
ENSG00000177000	MTHFR	0	1	0.163776
ENSG00000106328	FSCN3	0	1	0.163895
ENSG00000110448	CD5	0	1	0.163895
ENSG00000163584	RPL22L1	0	1	0.163895
ENSG00000124508	BTN2A2	0	1	0.164073
ENSG00000164938	TP53INP1	0	1	0.164073
ENSG00000101695	RNF125	0	1	0.164098
ENSG00000099797	TECR	0	1	0.164139
ENSG00000145675	PIK3R1	0	1	0.164139
ENSG00000165672	PRDX3	0	1	0.164171
ENSG00000019991	HGF	0	1	0.16423
ENSG00000157895	C12orf43	0	1	0.16423
ENSG00000117305	HMGCL	0	1	0.164266
ENSG00000136826	KLF4	0	1	0.164266
ENSG00000086504	MRPL28	0	1	0.164327
ENSG00000134057	CCNB1	0	1	0.164368
ENSG00000176407	KCMF1	0	1	0.164368
ENSG00000185905	C16orf54	0	1	0.164368
ENSG00000005379	TSPOAP1	0	1	0.164388
ENSG00000160862	AZGP1	0	1	0.164426
ENSG00000183960	KCNH8	0	1	0.164426
ENSG00000096088	PGC	0	1	0.164553
ENSG00000128607	KLHDC10	0	1	0.164553
ENSG00000186642	PDE2A	0	1	0.164553
ENSG00000141665	FBXO15	0	1	0.164723
ENSG00000177599	ZNF491	0	1	0.164723
ENSG00000196415	PRTN3	0	1	0.164723
ENSG00000158748	HTR6	0	1	0.164768
ENSG00000185189	NRBP2	0	1	0.164768
ENSG00000166548	TK2	0	1	0.164815
ENSG00000063438	AHRR	0	1	0.164875
ENSG00000064655	EYA2	0	1	0.164875
ENSG00000104327	CALB1	0	1	0.164882
ENSG00000116199	FAM20B	0	1	0.164882
ENSG00000139428	MMAB	0	1	0.16492
ENSG00000166676	TVP23A	0	1	0.16492
ENSG00000179632	MAF1	0	1	0.16492
ENSG00000054392	HHAT	0	1	0.164971
ENSG00000149503	INCENP	0	1	0.164984
ENSG00000153879	CEBPG	0	1	0.164984
ENSG00000077157	PPP1R12B	0	1	0.164993
ENSG00000117450	PRDX1	0	1	0.164993
ENSG00000174606	ANGEL2	0	1	0.164993
ENSG00000083454	P2RX5	0	1	0.1651
ENSG00000172458	IL17D	0	1	0.1651
ENSG00000181104	F2R	0	1	0.1651
ENSG00000082996	RNF13	0	1	0.16514
ENSG00000188372	ZP3	0	1	0.16514
ENSG00000101199	ARFGAP1	0	1	0.165149
ENSG00000150637	CD226	0	1	0.165149
ENSG00000138182	KIF20B	0	1	0.165328
ENSG00000162408	NOL9	0	1	0.165328
ENSG00000178732	GP5	0	1	0.165518
ENSG00000137185	ZSCAN9	0	1	0.165548
ENSG00000167157	PRRX2	0	1	0.165548
ENSG00000162877	PM20D1	0	1	0.165567
ENSG00000169344	UMOD	0	1	0.165585
ENSG00000185532	PRKG1	0	2	0.165585
ENSG00000113269	RNF130	0	1	0.16561
ENSG00000116701	NCF2	0	1	0.165648
ENSG00000144635	DYNC1LI1	0	1	0.165648
ENSG00000153822	KCNJ16	0	1	0.165648
ENSG00000176358	TAC4	0	1	0.165749
ENSG00000138675	FGF5	0	1	0.165897
ENSG00000163832	ELP6	0	1	0.166009
ENSG00000105708	ZNF14	0	1	0.16604
ENSG00000138430	OLA1	0	1	0.16604
ENSG00000147614	ATP6V0D2	0	1	0.16604
ENSG00000177732	SOX12	0	1	0.16604
ENSG00000101546	RBFA	0	1	0.166108
ENSG00000111276	CDKN1B	0	1	0.166108
ENSG00000140368	PSTPIP1	0	1	0.166108
ENSG00000141013	GAS8	0	1	0.166108
ENSG00000071575	TRIB2	0	1	0.166111
ENSG00000141946	ZIM3	0	1	0.166111
ENSG00000165376	CLDN2	0	1	0.166111
ENSG00000155530	LRGUK	0	1	0.166197
ENSG00000175535	PNLIP	0	1	0.166197
ENSG00000179636	TPPP2	0	1	0.166197
ENSG00000110274	CEP164	0	1	0.166309
ENSG00000173950	XXYLT1	0	1	0.166309
ENSG00000117983	MUC5B	0	1	0.166327
ENSG00000165171	METTL27	0	1	0.166327
ENSG00000187959	CPSF4L	0	1	0.166374
ENSG00000141480	ARRB2	0	1	0.16652
ENSG00000167916	KRT24	0	1	0.166548
ENSG00000125363	AMELX	0	1	0.166549
ENSG00000168556	ING2	0	1	0.166549
ENSG00000167491	GATAD2A	0	1	0.166561
ENSG00000215277	RNF212B	0	1	0.166568
ENSG00000063180	CA11	0	1	0.16657
ENSG00000177519	RPRM	0	1	0.166608
ENSG00000198604	BAZ1A	1	8	0.166644
ENSG00000145685	LHFPL2	0	1	0.166777
ENSG00000130244	FAM98C	0	1	0.166945
ENSG00000142168	SOD1	0	1	0.166945
ENSG00000167359	OR51I1	0	1	0.166945
ENSG00000180209	MYLPF	0	1	0.166945
ENSG00000139370	SLC15A4	0	1	0.166975
ENSG00000113070	HBEGF	0	1	0.167008
ENSG00000177600	RPLP2	0	1	0.167008
ENSG00000126878	AIF1L	0	1	0.167046
ENSG00000156574	NODAL	0	1	0.167091
ENSG00000166265	CYYR1	0	1	0.167091
ENSG00000206538	VGLL3	0	1	0.16719
ENSG00000086589	RBM22	0	1	0.167204
ENSG00000147697	GSDMC	0	1	0.167237
ENSG00000155755	TMEM237	0	1	0.167237
ENSG00000177570	SAMD12	0	1	0.167275
ENSG00000150403	TMCO3	0	1	0.167359
ENSG00000198088	NUP62CL	0	1	0.167409
ENSG00000007038	PRSS21	0	1	0.167411
ENSG00000064961	HMG20B	0	1	0.167411
ENSG00000052344	PRSS8	0	1	0.167423
ENSG00000133773	CCDC59	0	1	0.167423
ENSG00000082074	FYB1	0	2	0.167439
ENSG00000137996	RTCA	0	1	0.167439
ENSG00000164329	TENT2	0	1	0.167439
ENSG00000161048	NAPEPLD	0	1	0.167576
ENSG00000186073	CDIN1	0	1	0.167595
ENSG00000134882	UBAC2	0	1	0.167599
ENSG00000162851	TFB2M	0	1	0.167599
ENSG00000059728	MXD1	0	1	0.167696
ENSG00000135451	TROAP	0	1	0.167696
ENSG00000151418	ATP6V1G3	0	1	0.167696
ENSG00000169760	NLGN1	0	1	0.167696
ENSG00000141527	CARD14	0	1	0.167758
ENSG00000107290	SETX	0	2	0.167797
ENSG00000087495	PHACTR3	0	1	0.167806
ENSG00000112208	BAG2	0	1	0.167806
ENSG00000119280	C1orf198	0	1	0.167911
ENSG00000146587	RBAK	0	1	0.167911
ENSG00000165118	C9orf64	0	1	0.167911
ENSG00000185267	CDNF	0	1	0.167911
ENSG00000144802	NFKBIZ	0	1	0.167935
ENSG00000139726	DENR	0	1	0.16799
ENSG00000197872	CYRIA	0	1	0.16799
ENSG00000112210	RAB23	0	1	0.168114
ENSG00000167654	ATCAY	0	1	0.168114
ENSG00000170906	NDUFA3	0	1	0.168114
ENSG00000188176	SMTNL2	0	1	0.168114
ENSG00000103351	CLUAP1	0	1	0.168191
ENSG00000126953	TIMM8A	0	1	0.168233
ENSG00000167969	ECI1	0	1	0.168233
ENSG00000088992	TESC	0	1	0.16829
ENSG00000176601	MAP3K19	0	1	0.16829
ENSG00000197177	ADGRA1	0	1	0.16829
ENSG00000205359	SLCO6A1	0	1	0.16829
ENSG00000096654	ZNF184	0	1	0.168307
ENSG00000145990	GFOD1	0	1	0.168307
ENSG00000164076	CAMKV	0	1	0.168352
ENSG00000167863	ATP5PD	0	1	0.168352
ENSG00000166033	HTRA1	0	1	0.168398
ENSG00000050438	SLC4A8	0	1	0.168475
ENSG00000106031	HOXA13	0	1	0.168593
ENSG00000058729	RIOK2	0	1	0.16866
ENSG00000111707	SUDS3	0	1	0.16866
ENSG00000124120	TTPAL	0	1	0.16866
ENSG00000144746	ARL6IP5	0	1	0.16866
ENSG00000151617	EDNRA	0	1	0.16866
ENSG00000165406	MARCHF8	0	1	0.16866
ENSG00000226650	KIF4B	0	1	0.16866
ENSG00000128159	TUBGCP6	1	8	0.168788
ENSG00000120500	ARR3	0	1	0.168922
ENSG00000232629	HLA-DQB2	0	1	0.169023
ENSG00000167193	CRK	0	1	0.169114
ENSG00000111361	EIF2B1	0	1	0.169166
ENSG00000140006	WDR89	0	2	0.169166
ENSG00000179023	KLHDC7A	0	1	0.169166
ENSG00000256294	ZNF225	0	1	0.169166
ENSG00000168615	ADAM9	0	1	0.169205
ENSG00000197467	COL13A1	0	1	0.169205
ENSG00000054793	ATP9A	0	1	0.169353
ENSG00000137193	PIM1	0	1	0.169353
ENSG00000150630	VEGFC	0	1	0.169494
ENSG00000112619	PRPH2	0	1	0.169517
ENSG00000116288	PARK7	0	1	0.169517
ENSG00000083720	OXCT1	0	1	0.169538
ENSG00000115896	PLCL1	0	1	0.169538
ENSG00000164051	CCDC51	0	1	0.169538
ENSG00000138459	SLC35A5	0	1	0.16954
ENSG00000149357	LAMTOR1	0	1	0.16954
ENSG00000164081	TEX264	0	1	0.169547
ENSG00000173041	ZNF680	0	1	0.169547
ENSG00000168214	RBPJ	0	1	0.169596
ENSG00000145022	TCTA	0	1	0.169632
ENSG00000170627	GTSF1	0	1	0.169632
ENSG00000000460	C1orf112	0	1	0.169638
ENSG00000175591	P2RY2	0	1	0.169638
ENSG00000114529	C3orf52	0	1	0.169781
ENSG00000178502	KLHL11	0	1	0.169788
ENSG00000089486	CDIP1	0	1	0.170019
ENSG00000112981	NME5	0	1	0.170019
ENSG00000123240	OPTN	0	1	0.170019
ENSG00000101413	RPRD1B	0	1	0.170026
ENSG00000172426	RSPH9	0	1	0.170026
ENSG00000204673	AKT1S1	0	1	0.170026
ENSG00000160685	ZBTB7B	0	1	0.170046
ENSG00000119401	TRIM32	0	1	0.170052
ENSG00000167098	SUN5	0	2	0.170075
ENSG00000036672	USP2	0	1	0.170099
ENSG00000102974	CTCF	0	1	0.170099
ENSG00000134240	HMGCS2	0	1	0.170099
ENSG00000112335	SNX3	0	1	0.170268
ENSG00000152591	DSPP	0	1	0.170268
ENSG00000163472	TMEM79	0	1	0.170268
ENSG00000170967	DDI1	0	1	0.170268
ENSG00000079134	THOC1	0	1	0.170372
ENSG00000181939	OR4C15	0	1	0.170464
ENSG00000197587	DMBX1	0	1	0.170472
ENSG00000118733	OLFM3	0	1	0.170507
ENSG00000146147	MLIP	0	1	0.170507
ENSG00000174807	CD248	0	1	0.170514
ENSG00000121957	GPSM2	0	1	0.17072
ENSG00000170989	S1PR1	0	1	0.170768
ENSG00000171346	KRT15	0	1	0.170768
ENSG00000166796	LDHC	0	1	0.170785
ENSG00000172638	EFEMP2	0	1	0.170853
ENSG00000198131	ZNF544	0	1	0.170853
ENSG00000168824	NSG1	0	1	0.170854
ENSG00000103121	CMC2	0	1	0.170888
ENSG00000167257	RNF214	0	1	0.170888
ENSG00000214456	PLIN5	0	1	0.170902
ENSG00000100221	JOSD1	0	1	0.170926
ENSG00000164588	HCN1	0	1	0.170963
ENSG00000174839	DENND6A	0	1	0.170963
ENSG00000175718	RBMXL3	0	1	0.170963
ENSG00000182013	PNMA8A	0	1	0.170963
ENSG00000204347	BTBD17	0	1	0.171012
ENSG00000113302	IL12B	0	1	0.171027
ENSG00000159256	MORC3	0	1	0.171033
ENSG00000206562	METTL6	0	1	0.171033
ENSG00000174903	RAB1B	0	1	0.171073
ENSG00000176182	MYPOP	0	1	0.171073
ENSG00000154640	BTG3	0	1	0.171129
ENSG00000256061	DNAAF4	0	1	0.171129
ENSG00000162482	AKR7A3	0	1	0.171149
ENSG00000240583	AQP1	0	1	0.171149
ENSG00000026025	VIM	0	1	0.171316
ENSG00000187658	C5orf52	0	1	0.171361
ENSG00000122133	PAEP	0	1	0.171464
ENSG00000146826	TRAPPC14	0	1	0.171464
ENSG00000187987	ZSCAN23	0	1	0.171464
ENSG00000122042	UBL3	0	1	0.171485
ENSG00000159761	C16orf86	0	1	0.171485
ENSG00000167483	NIBAN3	0	1	0.171485
ENSG00000111666	CHPT1	0	1	0.171546
ENSG00000143816	WNT9A	0	1	0.171546
ENSG00000157502	PWWP3B	0	1	0.171546
ENSG00000151615	POU4F2	0	1	0.17155
ENSG00000116717	GADD45A	0	1	0.17164
ENSG00000145945	FAM50B	0	1	0.17164
ENSG00000123104	ITPR2	1	14	0.17175
ENSG00000139178	C1RL	0	1	0.171781
ENSG00000162227	TAF6L	0	1	0.171781
ENSG00000166960	CCDC178	0	1	0.171801
ENSG00000167981	ZNF597	0	1	0.171801
ENSG00000180921	FAM83H	0	1	0.171801
ENSG00000152518	ZFP36L2	0	1	0.171834
ENSG00000144040	SFXN5	0	1	0.171883
ENSG00000164169	PRMT9	0	1	0.171883
ENSG00000010030	ETV7	0	1	0.17192
ENSG00000100823	APEX1	0	1	0.171946
ENSG00000198898	CAPZA2	0	1	0.171946
ENSG00000053501	USE1	0	1	0.172035
ENSG00000170748	RBMXL2	0	1	0.172035
ENSG00000148248	SURF4	0	1	0.172082
ENSG00000160799	CCDC12	0	1	0.172093
ENSG00000108798	ABI3	0	1	0.172108
ENSG00000164128	NPY1R	0	1	0.172114
ENSG00000184992	BRI3BP	0	1	0.172114
ENSG00000213930	GALT	0	1	0.172114
ENSG00000092445	TYRO3	0	1	0.172126
ENSG00000107738	VSIR	0	1	0.172126
ENSG00000100014	SPECC1L	0	1	0.172224
ENSG00000131482	G6PC1	0	1	0.172244
ENSG00000172320	OR5A1	0	1	0.172244
ENSG00000174749	FAM241A	0	1	0.172244
ENSG00000117020	AKT3	0	1	0.172264
ENSG00000146383	TAAR6	0	1	0.172309
ENSG00000172232	AZU1	0	1	0.172309
ENSG00000175564	UCP3	0	1	0.172309
ENSG00000132274	TRIM22	0	1	0.172312
ENSG00000101180	HRH3	0	1	0.172336
ENSG00000165030	NFIL3	0	1	0.172336
ENSG00000185811	IKZF1	0	1	0.172336
ENSG00000198551	ZNF627	0	1	0.172355
ENSG00000188559	RALGAPA2	1	13	0.172395
ENSG00000108947	EFNB3	0	1	0.172436
ENSG00000119973	PRLHR	0	1	0.172436
ENSG00000105287	PRKD2	0	1	0.172579
ENSG00000126432	PRDX5	0	1	0.172579
ENSG00000143882	ATP6V1C2	0	1	0.172579
ENSG00000156976	EIF4A2	0	2	0.172579
ENSG00000181035	SLC25A42	0	1	0.172698
ENSG00000174697	LEP	0	1	0.172784
ENSG00000132952	USPL1	0	1	0.172858
ENSG00000153162	BMP6	0	1	0.172858
ENSG00000101474	APMAP	0	1	0.1729
ENSG00000105298	CACTIN	0	1	0.1729
ENSG00000119599	DCAF4	0	1	0.1729
ENSG00000197106	SLC6A17	0	1	0.1729
ENSG00000168070	MAJIN	0	1	0.172917
ENSG00000072501	SMC1A	0	1	0.172943
ENSG00000101306	MYLK2	0	1	0.172943
ENSG00000119913	TECTB	0	1	0.172943
ENSG00000175745	NR2F1	0	1	0.172943
ENSG00000057757	PITHD1	0	1	0.172993
ENSG00000099999	RNF215	0	1	0.172993
ENSG00000130803	ZNF317	0	1	0.172993
ENSG00000141433	ADCYAP1	0	1	0.172993
ENSG00000163110	PDLIM5	0	1	0.172993
ENSG00000073598	FNDC8	0	1	0.173106
ENSG00000110700	RPS13	0	1	0.173183
ENSG00000129167	TPH1	0	1	0.173183
ENSG00000205758	CRYZL1	0	1	0.173183
ENSG00000107960	STN1	0	1	0.17319
ENSG00000188620	HMX3	0	1	0.17319
ENSG00000083814	ZNF671	0	1	0.17336
ENSG00000214511	HIGD1C	0	1	0.173417
ENSG00000087095	NLK	0	1	0.173422
ENSG00000115827	DCAF17	0	1	0.173472
ENSG00000118298	CA14	0	1	0.173472
ENSG00000145919	BOD1	0	1	0.173475
ENSG00000162344	FGF19	0	1	0.173475
ENSG00000116176	TPSG1	0	1	0.173539
ENSG00000149212	SESN3	0	1	0.173588
ENSG00000112699	GMDS	0	1	0.173642
ENSG00000250317	SMIM20	0	1	0.173642
ENSG00000082458	DLG3	0	1	0.173697
ENSG00000182333	LIPF	0	1	0.173697
ENSG00000114302	PRKAR2A	0	1	0.173754
ENSG00000115073	ACTR1B	0	1	0.173754
ENSG00000143178	TBX19	0	1	0.173754
ENSG00000165140	FBP1	0	1	0.173754
ENSG00000102383	ZDHHC15	0	1	0.173785
ENSG00000180992	MRPL14	0	1	0.173785
ENSG00000065413	ANKRD44	0	1	0.173787
ENSG00000163166	IWS1	0	1	0.173787
ENSG00000163702	IL17RC	0	1	0.173787
ENSG00000145936	KCNMB1	0	1	0.173797
ENSG00000143851	PTPN7	0	1	0.173896
ENSG00000167165	UGT1A6	0	1	0.173896
ENSG00000119048	UBE2B	0	1	0.173912
ENSG00000137948	BRDT	0	1	0.173913
ENSG00000198498	TMA16	0	1	0.173913
ENSG00000102595	UGGT2	0	1	0.173928
ENSG00000166266	CUL5	0	1	0.174027
ENSG00000137101	CD72	0	1	0.174043
ENSG00000180776	ZDHHC20	0	1	0.174043
ENSG00000147533	GOLGA7	0	1	0.174048
ENSG00000140993	TIGD7	0	1	0.174067
ENSG00000122691	TWIST1	0	1	0.174088
ENSG00000188095	MESP2	0	1	0.174098
ENSG00000090565	RAB11FIP3	0	1	0.174123
ENSG00000120337	TNFSF18	0	1	0.174123
ENSG00000100884	CPNE6	0	1	0.174138
ENSG00000068079	IFI35	0	1	0.174142
ENSG00000112530	PACRG	0	2	0.174142
ENSG00000118160	SLC8A2	0	1	0.174142
ENSG00000081870	HSPB11	0	1	0.174392
ENSG00000085377	PREP	0	1	0.174495
ENSG00000101638	ST8SIA5	0	1	0.174495
ENSG00000139330	KERA	0	1	0.174495
ENSG00000131386	GALNT15	0	1	0.17451
ENSG00000187742	SECISBP2	0	2	0.174687
ENSG00000163586	FABP1	0	1	0.174701
ENSG00000171914	TLN2	1	14	0.17471
ENSG00000103356	EARS2	0	1	0.174791
ENSG00000159388	BTG2	0	1	0.174791
ENSG00000169908	TM4SF1	0	2	0.174791
ENSG00000184557	SOCS3	0	1	0.174791
ENSG00000117335	CD46	0	1	0.17484
ENSG00000177476	OR2G3	0	1	0.17484
ENSG00000125522	NPBWR2	0	1	0.174842
ENSG00000125879	OTOR	0	1	0.174842
ENSG00000124939	SCGB2A1	0	1	0.174953
ENSG00000132016	BRME1	0	1	0.174953
ENSG00000111796	KLRB1	0	1	0.174975
ENSG00000172936	MYD88	0	1	0.174975
ENSG00000133106	EPSTI1	0	1	0.174982
ENSG00000005882	PDK2	0	1	0.174988
ENSG00000116750	UCHL5	0	1	0.174988
ENSG00000173451	THAP2	0	1	0.174988
ENSG00000181009	OR52N5	0	1	0.174988
ENSG00000183060	LYSMD4	0	1	0.174988
ENSG00000129159	KCNC1	0	1	0.175018
ENSG00000180481	GLIPR1L2	0	1	0.175018
ENSG00000108679	LGALS3BP	0	1	0.175046
ENSG00000172667	ZMAT3	0	1	0.175046
ENSG00000184785	SMIM10	0	1	0.175046
ENSG00000116791	CRYZ	0	1	0.175099
[truncated: 10,481 more rows]

## Sheet: Rare damaging model
Ensembl Gene ID	Gene Symbol	Cases (n=66)	Controls (n=2923)	p values
ENSG00000057019	DCBLD2	5	16	3.91e-05
ENSG00000104856	RELB	4	8	7.68e-05
ENSG00000142459	EVI5L	2	1	0.000132269
ENSG00000154473	BUB3	2	1	0.000148006
ENSG00000187764	SEMA4D	4	14	0.000229453
ENSG00000140854	KATNB1	4	15	0.000236973
ENSG00000179841	AKAP5	2	2	0.000299446
ENSG00000133027	PEMT	2	1	0.000344225
ENSG00000139725	RHOF	3	5	0.000359451
ENSG00000156599	ZDHHC5	4	23	0.000422976
ENSG00000174970	OR10AG1	2	3	0.000462917
ENSG00000069667	RORA	2	2	0.000522806
ENSG00000184560	SPEM2	2	2	0.000645636
ENSG00000171487	NLRP5	3	11	0.000715131
ENSG00000126947	ARMCX1	2	2	0.000728392
ENSG00000159496	RGL4	2	4	0.000757547
ENSG00000180440	SERTM1	1	0	0.00109936
ENSG00000101421	CHMP4B	1	0	0.00109994
ENSG00000185651	UBE2L3	1	0	0.00109994
ENSG00000132950	ZMYM5	2	4	0.00117765
ENSG00000092051	JPH4	2	5	0.00119164
ENSG00000198707	CEP290	6	53	0.00125025
ENSG00000102401	ARMCX3	1	0	0.00129695
ENSG00000162723	SLAMF9	1	0	0.00129695
ENSG00000143570	SLC39A1	1	0	0.00133919
ENSG00000065427	KARS1	3	13	0.00139682
ENSG00000178821	TMEM52	1	0	0.00149627
ENSG00000204256	BRD2	3	14	0.0015017
ENSG00000165476	REEP3	2	5	0.00160406
ENSG00000110048	OSBP	3	16	0.00160871
ENSG00000144331	ZNF385B	2	5	0.00164048
ENSG00000174886	NDUFA11	1	0	0.00164561
ENSG00000163536	SERPINI1	2	4	0.00169884
ENSG00000175305	CCNE2	2	4	0.00173084
ENSG00000160908	ZNF394	2	4	0.00175734
ENSG00000124313	IQSEC2	2	4	0.0017588
ENSG00000167037	SGSM1	5	37	0.0018039
ENSG00000006015	REX1BD	1	0	0.001804
ENSG00000198216	CACNA1E	4	28	0.00182386
ENSG00000115091	ACTR3	1	0	0.00192574
ENSG00000188938	FAM120AOS	1	0	0.00192574
ENSG00000172375	C2CD2L	3	16	0.00194729
ENSG00000132972	RNF17	3	14	0.00194779
ENSG00000182578	CSF1R	3	17	0.00197076
ENSG00000142453	CARM1	2	5	0.00211056
ENSG00000167874	TMEM88	1	0	0.00221827
ENSG00000170624	SGCD	2	6	0.00222605
ENSG00000176798	OR51L1	2	6	0.00236054
ENSG00000198965	OR10R2	2	3	0.00257792
ENSG00000179873	NLRP11	1	0	0.00261202
ENSG00000167005	NUDT21	1	0	0.00261537
ENSG00000175768	TOMM5	1	0	0.00261549
ENSG00000157514	TSC22D3	1	0	0.00267694
ENSG00000164822	DEFA6	1	0	0.00267694
ENSG00000256713	PGA5	1	0	0.00267694
ENSG00000186280	KDM4D	1	0	0.00277524
ENSG00000070950	RAD18	2	5	0.00286964
ENSG00000172377	OR9I1	1	1	0.00291882
ENSG00000100744	GSKIP	1	0	0.00295583
ENSG00000142039	CCDC97	3	16	0.00305335
ENSG00000183891	TTC32	2	5	0.00317162
ENSG00000154134	ROBO3	5	40	0.00317487
ENSG00000204882	GPR20	2	5	0.00323516
ENSG00000156687	UNC5D	3	12	0.00334907
ENSG00000065491	TBC1D22B	2	7	0.00337124
ENSG00000108468	CBX1	1	1	0.00342511
ENSG00000132341	RAN	1	0	0.00343605
ENSG00000124813	RUNX2	2	8	0.0035036
ENSG00000197363	ZNF517	1	1	0.00359049
ENSG00000205808	PLPP6	2	7	0.00363151
ENSG00000101574	METTL4	2	8	0.00365946
ENSG00000171940	ZNF217	2	5	0.00372502
ENSG00000100151	PICK1	2	8	0.00377081
ENSG00000130725	UBE2M	1	1	0.00382653
ENSG00000213760	ATP6V1G2	1	0	0.00383206
ENSG00000147160	AWAT2	1	1	0.00391966
ENSG00000141376	BCAS3	3	19	0.00396077
ENSG00000253797	UTP14C	1	1	0.00402932
ENSG00000163577	EIF5A2	1	1	0.00405364
ENSG00000160991	ORAI2	1	1	0.00407376
ENSG00000100234	TIMP3	1	1	0.00409848
ENSG00000186113	OR5D14	2	7	0.0041011
ENSG00000164402	SEPTIN8	3	19	0.00413151
ENSG00000175535	PNLIP	2	10	0.00426487
ENSG00000129474	AJUBA	1	0	0.00427669
ENSG00000019102	VSIG2	2	6	0.0043415
ENSG00000133805	AMPD3	3	21	0.00435078
ENSG00000154027	AK5	2	9	0.00436217
ENSG00000168763	CNNM3	2	9	0.00449273
ENSG00000096401	CDC5L	2	8	0.00450344
ENSG00000155816	FMN2	3	15	0.00453523
ENSG00000122882	ECD	3	22	0.00454534
ENSG00000204435	CSNK2B	1	1	0.00457483
ENSG00000205593	DENND6B	2	9	0.0045889
ENSG00000124249	KCNK15	1	1	0.00460741
ENSG00000152465	NMT2	2	8	0.00461464
ENSG00000141433	ADCYAP1	1	1	0.00466803
ENSG00000175471	MCTP1	2	10	0.00468553
ENSG00000121871	SLITRK3	2	9	0.00472237
ENSG00000134324	LPIN1	3	14	0.00485376
ENSG00000089177	KIF16B	4	35	0.00486654
ENSG00000099812	MISP	2	9	0.00491139
ENSG00000119655	NPC2	2	7	0.0049145
ENSG00000189339	SLC35E2B	1	2	0.0049762
ENSG00000175467	SART1	2	8	0.00497852
ENSG00000136235	GPNMB	2	9	0.0049846
ENSG00000116221	MRPL37	2	8	0.00501204
ENSG00000087245	MMP2	2	9	0.00501229
ENSG00000142515	KLK3	1	1	0.00501545
ENSG00000241370	RPP21	2	9	0.00502301
ENSG00000124209	RAB22A	1	1	0.00502498
ENSG00000198816	ZNF358	1	0	0.00502919
ENSG00000185985	SLITRK2	2	9	0.00513599
ENSG00000188629	ZNF177	2	8	0.00517895
ENSG00000161082	CELF5	1	1	0.00523301
ENSG00000103522	IL21R	1	1	0.00523597
ENSG00000141933	TPGS1	1	1	0.00526648
ENSG00000163424	TEX55	1	1	0.00526766
ENSG00000251664	PCDHA12	3	16	0.00531195
ENSG00000130844	ZNF331	1	1	0.00533243
ENSG00000182979	MTA1	2	8	0.00536162
ENSG00000023734	STRAP	1	1	0.00536771
ENSG00000100784	RPS6KA5	2	8	0.00543632
ENSG00000159224	GIP	1	1	0.00545127
ENSG00000130383	FUT5	1	1	0.00546763
ENSG00000196850	PPTC7	1	1	0.00548425
ENSG00000174521	TTC9B	1	1	0.0054968
ENSG00000197614	MFAP5	1	2	0.00555418
ENSG00000184350	MRGPRE	1	2	0.00558005
ENSG00000164808	SPIDR	2	9	0.00563269
ENSG00000147183	CPXCR1	1	0	0.0056987
ENSG00000178343	SHISA3	2	4	0.00572883
ENSG00000079691	CARMIL1	3	20	0.00575368
ENSG00000174576	NPAS4	2	10	0.00580255
ENSG00000167011	NAT16	1	0	0.00581993
ENSG00000177694	NAALADL2	2	8	0.0059102
ENSG00000093010	COMT	2	10	0.00594991
ENSG00000122733	PHF24	2	8	0.00596024
ENSG00000159267	HLCS	2	10	0.00596512
ENSG00000103160	HSDL1	2	9	0.00600944
ENSG00000164758	MED30	1	2	0.00601766
ENSG00000160789	LMNA	2	8	0.00603434
ENSG00000182272	B4GALNT4	2	6	0.00607248
ENSG00000148219	ASTN2	4	39	0.00613667
ENSG00000185722	ANKFY1	3	22	0.00622539
ENSG00000158786	PLA2G2F	1	1	0.00627577
ENSG00000155329	ZCCHC10	1	2	0.00629718
ENSG00000136100	VPS36	1	2	0.00636264
ENSG00000184343	SRPK3	2	8	0.00636514
ENSG00000196323	ZBTB44	1	1	0.00638955
ENSG00000122778	KIAA1549	3	24	0.00639254
ENSG00000166435	XRRA1	2	9	0.00648393
ENSG00000131944	FAAP24	1	1	0.00650259
ENSG00000204138	PHACTR4	2	9	0.00655292
ENSG00000183876	ARSI	3	20	0.006723
ENSG00000087095	NLK	2	9	0.00672808
ENSG00000196220	SRGAP3	3	25	0.00673869
ENSG00000003756	RBM5	2	10	0.0067407
ENSG00000161996	WDR90	4	39	0.00677113
ENSG00000167632	TRAPPC9	3	25	0.0068812
ENSG00000129951	PLPPR3	1	2	0.00689261
ENSG00000180776	ZDHHC20	1	2	0.00696909
ENSG00000136153	LMO7	4	39	0.00704139
ENSG00000183579	ZNRF3	2	7	0.00710415
ENSG00000014919	COX15	2	5	0.00711772
ENSG00000187918	OR51I2	1	1	0.00717223
ENSG00000123838	C4BPA	1	2	0.00721894
ENSG00000114026	OGG1	2	9	0.00728975
ENSG00000170276	HSPB2	2	3	0.00743459
ENSG00000154485	MMP21	2	10	0.00745808
ENSG00000168952	STXBP6	1	2	0.00751859
ENSG00000126759	CFP	1	2	0.00758296
ENSG00000138311	ZNF365	2	9	0.00764846
ENSG00000198018	ENTPD7	3	20	0.00773728
ENSG00000161914	ZNF653	2	11	0.00774586
ENSG00000117009	KMO	1	2	0.00777032
ENSG00000118454	ANKRD13C	1	2	0.00782427
ENSG00000105948	TTC26	2	10	0.00791706
ENSG00000174796	THAP6	1	1	0.00793124
ENSG00000157450	RNF111	3	21	0.00809977
ENSG00000144749	LRIG1	3	24	0.00809981
ENSG00000147246	HTR2C	1	1	0.00810107
ENSG00000143889	HNRNPLL	2	9	0.00822823
ENSG00000172782	FADS6	2	10	0.00831294
ENSG00000136867	SLC31A2	1	1	0.00838005
ENSG00000176225	RTTN	4	41	0.00843683
ENSG00000172366	MCRIP2	1	1	0.00844872
ENSG00000123159	GIPC1	2	5	0.0085948
ENSG00000004838	ZMYND10	2	10	0.00859554
ENSG00000142669	SH3BGRL3	1	1	0.00861639
ENSG00000138434	ITPRID2	3	25	0.0087286
ENSG00000133858	ZFC3H1	3	25	0.00886825
ENSG00000173517	PEAK1	4	27	0.00895963
ENSG00000185404	SP140L	1	1	0.00903745
ENSG00000099219	ERMP1	3	23	0.00907363
ENSG00000179387	ELMOD2	1	2	0.00913672
ENSG00000173698	ADGRG2	2	8	0.00916835
ENSG00000166333	ILK	2	11	0.00930489
ENSG00000100243	CYB5R3	2	11	0.00930565
ENSG00000186174	BCL9L	3	23	0.0093069
ENSG00000198739	LRRTM3	2	8	0.00931205
ENSG00000198756	COLGALT2	2	11	0.00940167
ENSG00000170604	IRF2BP1	1	2	0.00966609
ENSG00000111328	CDK2AP1	1	2	0.00974387
ENSG00000007237	GAS7	2	11	0.00981765
ENSG00000152078	TLCD4	1	2	0.00982066
ENSG00000181778	TMEM252	1	2	0.00989107
ENSG00000164508	H2AC1	1	2	0.0100466
ENSG00000188133	TMEM215	1	2	0.0101371
ENSG00000106638	TBL2	2	10	0.0101765
ENSG00000112462	OR12D3	1	2	0.0102765
ENSG00000139697	SBNO1	3	24	0.0102994
ENSG00000094914	AAAS	3	22	0.0103559
ENSG00000133048	CHI3L1	2	14	0.010411
ENSG00000113525	IL5	1	2	0.0105497
ENSG00000188064	WNT7B	1	2	0.0105831
ENSG00000180185	FAHD1	2	11	0.0107524
ENSG00000137656	BUD13	2	12	0.0107622
ENSG00000089820	ARHGAP4	2	12	0.0108014
ENSG00000204704	OR2W1	1	1	0.0108586
ENSG00000186469	GNG2	1	2	0.0108751
ENSG00000184990	SIVA1	1	2	0.0108844
ENSG00000064835	POU1F1	1	2	0.0108873
ENSG00000177666	PNPLA2	2	8	0.0109536
ENSG00000063854	HAGH	2	11	0.0109689
ENSG00000169032	MAP2K1	1	2	0.0110155
ENSG00000159708	LRRC36	2	11	0.0110766
ENSG00000125650	PSPN	1	2	0.0111352
ENSG00000184368	MAP7D2	2	10	0.0111723
ENSG00000146122	DAAM2	3	24	0.0112242
ENSG00000108306	FBXL20	1	2	0.0112278
ENSG00000125651	GTF2F1	3	19	0.0112364
ENSG00000180592	SKIDA1	3	19	0.0112635
ENSG00000144036	EXOC6B	2	11	0.0113521
ENSG00000164743	C8orf48	1	3	0.0113784
ENSG00000158887	MPZ	1	3	0.0114008
ENSG00000170381	SEMA3E	2	13	0.0114251
ENSG00000123405	NFE2	1	2	0.0115035
ENSG00000134438	RAX	1	2	0.0115444
ENSG00000057608	GDI2	1	3	0.011556
ENSG00000181938	GINS3	1	2	0.0115929
ENSG00000160214	RRP1	2	6	0.0116418
ENSG00000102755	FLT1	2	10	0.0118064
ENSG00000204001	LCN8	1	3	0.0118116
ENSG00000101435	CST9L	1	0	0.0118584
ENSG00000171094	ALK	4	42	0.0119037
ENSG00000213799	ZNF845	1	2	0.0119542
ENSG00000166971	AKTIP	1	2	0.0120292
ENSG00000171564	FGB	2	14	0.0120515
ENSG00000131943	C19orf12	1	3	0.0121096
ENSG00000181001	OR52N1	1	3	0.0121128
ENSG00000100167	SEPTIN3	1	3	0.0121341
ENSG00000163818	LZTFL1	1	2	0.0121806
ENSG00000167619	TMEM145	2	12	0.0122089
ENSG00000108587	GOSR1	1	2	0.0123172
ENSG00000187210	GCNT1	1	3	0.0123213
ENSG00000126756	UXT	1	1	0.0123791
ENSG00000174010	KLHL15	1	2	0.0123849
ENSG00000166924	NYAP1	2	13	0.0123853
ENSG00000186895	FGF3	1	2	0.0123958
ENSG00000124107	SLPI	1	4	0.0125336
ENSG00000167653	PSCA	1	2	0.0126178
ENSG00000172765	TMCC1	1	3	0.0126272
ENSG00000040275	SPDL1	2	14	0.0126296
ENSG00000186350	RXRA	1	4	0.0127438
ENSG00000186283	TOR3A	2	11	0.0127673
ENSG00000145945	FAM50B	1	3	0.0127795
ENSG00000080839	RBL1	3	19	0.0128229
ENSG00000147155	EBP	1	3	0.0129572
ENSG00000160233	LRRC3	1	3	0.0130436
ENSG00000101294	HM13	1	3	0.0130603
ENSG00000099804	CDC34	1	3	0.0130938
ENSG00000176371	ZSCAN2	2	15	0.0131247
ENSG00000159200	RCAN1	2	8	0.0131535
ENSG00000196867	ZFP28	1	3	0.0131764
ENSG00000204946	ZNF783	1	3	0.0131787
ENSG00000187257	RSBN1L	2	14	0.0133087
ENSG00000102385	DRP2	2	11	0.0133439
ENSG00000158859	ADAMTS4	3	26	0.0133515
ENSG00000068120	COASY	3	26	0.0133977
ENSG00000142619	PADI3	4	50	0.0134571
ENSG00000005893	LAMP2	1	2	0.0134649
ENSG00000174963	ZIC4	1	3	0.0135608
ENSG00000110237	ARHGEF17	4	45	0.0135609
ENSG00000110448	CD5	1	3	0.0136004
ENSG00000125084	WNT1	1	3	0.01372
ENSG00000164379	FOXQ1	1	3	0.0137636
ENSG00000165898	ISCA2	1	3	0.0137957
ENSG00000111911	HINT3	1	2	0.0140124
ENSG00000102805	CLN5	1	3	0.0140443
ENSG00000175398	OR10P1	1	4	0.0140475
ENSG00000090924	PLEKHG2	3	22	0.0140715
ENSG00000167608	TMC4	2	12	0.0141731
ENSG00000168060	NAALADL1	3	31	0.0142377
ENSG00000100479	POLE2	2	11	0.0142424
ENSG00000122584	NXPH1	1	3	0.0142444
ENSG00000189283	FHIT	2	10	0.0142816
ENSG00000196460	RFX8	2	11	0.0143212
ENSG00000104371	DKK4	1	3	0.0143837
ENSG00000088035	ALG6	1	3	0.0144015
ENSG00000241973	PI4KA	3	31	0.0145752
ENSG00000134056	MRPS36	1	0	0.014637
ENSG00000124074	ENKD1	2	9	0.0147066
ENSG00000114423	CBLB	2	17	0.0147407
ENSG00000183389	OR56A4	2	12	0.0147905
ENSG00000181718	OR5T2	1	2	0.0150201
ENSG00000221988	PPT2	1	4	0.0150857
ENSG00000154447	SH3RF1	2	14	0.0151038
ENSG00000031081	ARHGAP31	2	15	0.0151409
ENSG00000203663	OR2L2	1	2	0.0152054
ENSG00000113966	ARL6	1	2	0.0152325
ENSG00000165458	INPPL1	3	27	0.0152334
ENSG00000126822	PLEKHG3	3	30	0.0152755
ENSG00000146067	FAM193B	3	22	0.015356
ENSG00000140749	IGSF6	1	2	0.0155676
ENSG00000241685	ARPC1A	2	11	0.0155761
ENSG00000133561	GIMAP6	2	11	0.0155897
ENSG00000164885	CDK5	1	2	0.0156
ENSG00000033627	ATP6V0A1	2	14	0.0156216
ENSG00000168646	AXIN2	2	12	0.0156375
ENSG00000136280	CCM2	2	15	0.0156569
ENSG00000215912	TTC34	1	3	0.0156886
ENSG00000228607	CLDN25	1	3	0.0156938
ENSG00000243156	MICAL3	4	55	0.0157949
ENSG00000143921	ABCG8	3	26	0.0157986
ENSG00000138111	MFSD13A	2	13	0.0159073
ENSG00000125618	PAX8	2	13	0.015946
ENSG00000183647	ZNF530	1	2	0.0160256
ENSG00000139973	SYT16	2	13	0.0160333
ENSG00000131725	WDR44	1	4	0.016055
ENSG00000205126	ACCSL	1	3	0.0161214
ENSG00000130649	CYP2E1	1	3	0.0161631
ENSG00000205730	ITPRIPL2	2	13	0.0161999
ENSG00000181733	OR2Z1	1	3	0.0162203
ENSG00000150628	SPATA4	1	4	0.0163835
ENSG00000174004	NRROS	1	4	0.0164087
ENSG00000116711	PLA2G4A	1	2	0.0164259
ENSG00000126861	OMG	1	3	0.0164523
ENSG00000107201	DDX58	2	14	0.0164763
ENSG00000164105	SAP30	1	1	0.0164846
ENSG00000105373	NOP53	1	3	0.0166201
ENSG00000160190	SLC37A1	2	12	0.0166471
ENSG00000198331	HYLS1	1	3	0.0166782
ENSG00000180919	OR56B4	1	3	0.0167237
ENSG00000064652	SNX24	1	3	0.0167485
ENSG00000198176	TFDP1	1	3	0.0167816
ENSG00000132170	PPARG	1	2	0.0168022
ENSG00000163376	KBTBD8	2	15	0.0168282
ENSG00000109576	AADAT	1	4	0.0168892
ENSG00000188783	PRELP	1	3	0.0169118
ENSG00000086991	NOX4	1	3	0.0169149
ENSG00000137691	CFAP300	1	3	0.0169216
ENSG00000158552	ZFAND2B	1	3	0.0170653
ENSG00000010671	BTK	1	3	0.0172354
ENSG00000155099	PIP4P2	1	3	0.0172921
ENSG00000054179	ENTPD2	2	11	0.017321
ENSG00000180772	AGTR2	1	3	0.0173594
ENSG00000147852	VLDLR	2	15	0.0174126
ENSG00000182070	OR52A1	1	4	0.0174619
ENSG00000130176	CNN1	1	4	0.0175059
ENSG00000112146	FBXO9	1	2	0.0175128
ENSG00000170458	CD14	1	4	0.0175583
ENSG00000118402	ELOVL4	1	4	0.0175839
ENSG00000105829	BET1	1	3	0.017595
ENSG00000131931	THAP1	1	2	0.0176053
ENSG00000177105	RHOG	1	1	0.0176451
ENSG00000164308	ERAP2	3	29	0.0177307
ENSG00000138286	FAM149B1	2	13	0.0178828
ENSG00000137203	TFAP2A	1	3	0.0179246
ENSG00000186448	ZNF197	2	12	0.0179545
ENSG00000111186	WNT5B	1	1	0.0179592
ENSG00000165591	FAAH2	2	12	0.0179674
ENSG00000152495	CAMK4	1	4	0.0179769
ENSG00000163817	SLC6A20	3	28	0.0180682
ENSG00000198467	TPM2	1	3	0.0181179
ENSG00000183735	TBK1	2	13	0.0181432
ENSG00000152147	GEMIN6	1	4	0.018417
ENSG00000052795	FNIP2	2	14	0.0184493
ENSG00000116668	SWT1	1	4	0.018457
ENSG00000221914	PPP2R2A	1	3	0.0184766
ENSG00000176387	HSD11B2	1	2	0.0184807
ENSG00000139540	SLC39A5	2	15	0.0184811
ENSG00000163932	PRKCD	2	12	0.0184908
ENSG00000011405	PIK3C2A	3	33	0.0185114
ENSG00000165916	PSMC3	1	4	0.0185414
ENSG00000196924	FLNA	3	34	0.0185419
ENSG00000106538	RARRES2	1	3	0.0186062
ENSG00000147955	SIGMAR1	1	3	0.0186099
ENSG00000171236	LRG1	1	3	0.0186322
ENSG00000102034	ELF4	1	3	0.0187232
ENSG00000197483	ZNF628	1	4	0.0187614
ENSG00000105193	RPS16	1	3	0.01879
ENSG00000140650	PMM2	2	17	0.0189376
ENSG00000159592	GPBP1L1	2	16	0.0189457
ENSG00000178913	TAF7	1	3	0.0190329
ENSG00000183640	KRTAP8-1	1	2	0.0190813
ENSG00000179673	RPRML	1	1	0.0191401
ENSG00000100908	EMC9	1	1	0.019176
ENSG00000221968	FADS3	2	14	0.0192081
ENSG00000203666	EFCAB2	1	3	0.0192548
ENSG00000101076	HNF4A	1	3	0.0192671
ENSG00000105696	TMEM59L	1	4	0.0192964
ENSG00000166860	ZBTB39	3	24	0.0192977
ENSG00000164828	SUN1	2	11	0.0193289
ENSG00000124780	KCNK17	1	4	0.0193828
ENSG00000091640	SPAG7	1	3	0.0194723
ENSG00000182791	CCDC87	2	10	0.0194949
ENSG00000185800	DMWD	1	2	0.0195149
ENSG00000189227	C15orf61	1	3	0.0195198
ENSG00000226288	OR52I2	1	3	0.0195703
ENSG00000214226	C17orf67	1	4	0.0196386
ENSG00000186675	MAGEE2	1	3	0.0196959
ENSG00000016490	CLCA1	2	15	0.0197378
ENSG00000165029	ABCA1	4	47	0.0197517
ENSG00000104967	NOVA2	1	2	0.0198156
ENSG00000105278	ZFR2	2	16	0.0198667
ENSG00000117600	PLPPR4	2	15	0.0199282
ENSG00000160551	TAOK1	2	16	0.0200497
ENSG00000128699	ORMDL1	1	2	0.0200538
ENSG00000130699	TAF4	1	5	0.0201332
ENSG00000168427	KLHL30	2	15	0.0201493
ENSG00000110375	UPK2	1	4	0.0202117
ENSG00000169964	TMEM42	1	4	0.0202358
ENSG00000183690	EFHC2	1	4	0.0203406
ENSG00000172020	GAP43	1	0	0.020343
ENSG00000185420	SMYD3	2	17	0.0204926
ENSG00000111850	SMIM8	1	4	0.0205759
ENSG00000178035	IMPDH2	1	3	0.0205772
ENSG00000150779	TIMM8B	1	2	0.0206091
ENSG00000099341	PSMD8	1	3	0.0206371
ENSG00000071991	CDH19	2	14	0.0206483
ENSG00000177370	TIMM22	1	4	0.0206722
ENSG00000096654	ZNF184	1	4	0.02071
ENSG00000203805	PLPP4	2	16	0.0207343
ENSG00000007001	UPP2	1	5	0.0207558
ENSG00000157060	SHCBP1L	2	13	0.0208419
ENSG00000122367	LDB3	3	29	0.0208873
ENSG00000156427	FGF18	1	4	0.0209501
ENSG00000197790	OR52M1	2	15	0.0210805
ENSG00000171497	PPID	1	4	0.0210871
ENSG00000105642	KCNN1	1	3	0.0212281
ENSG00000198858	R3HDM4	1	5	0.0212482
ENSG00000104879	CKM	2	12	0.0212642
ENSG00000118520	ARG1	1	3	0.021268
ENSG00000243646	IL10RB	1	4	0.0213125
ENSG00000168385	SEPTIN2	1	4	0.0214037
ENSG00000113648	MACROH2A1	1	2	0.0214705
ENSG00000186452	TMPRSS12	1	4	0.0214803
ENSG00000158717	RNF166	1	2	0.0215107
ENSG00000124920	MYRF	2	10	0.0215653
ENSG00000120242	IFNA8	1	2	0.0216883
ENSG00000104613	INTS10	2	15	0.0216957
ENSG00000102003	SYP	1	3	0.02181
ENSG00000168148	H3-4	1	4	0.0218816
ENSG00000155275	TRMT44	2	16	0.0219426
ENSG00000162076	FLYWCH2	1	2	0.0219524
ENSG00000188313	PLSCR1	1	4	0.0219627
ENSG00000118482	PHF3	3	31	0.0220076
ENSG00000137814	HAUS2	1	3	0.0220324
ENSG00000066117	SMARCD1	1	4	0.0220712
ENSG00000178342	KCNG2	1	3	0.0221177
ENSG00000145526	CDH18	2	14	0.0222052
ENSG00000114520	SNX4	1	3	0.0222846
ENSG00000102858	MGRN1	2	17	0.0223671
ENSG00000196139	AKR1C3	1	5	0.0223752
ENSG00000081760	AACS	3	23	0.0224402
ENSG00000013374	NUB1	2	15	0.0224741
ENSG00000109911	ELP4	2	11	0.0224783
ENSG00000107099	DOCK8	6	85	0.022488
ENSG00000117322	CR2	2	16	0.0224931
ENSG00000001631	KRIT1	2	16	0.0225374
ENSG00000139496	NUP58	1	4	0.022592
ENSG00000150625	GPM6A	1	4	0.0226282
ENSG00000112116	IL17F	1	5	0.0226411
ENSG00000173926	MARCHF3	1	4	0.0227347
ENSG00000147799	ARHGAP39	2	17	0.022753
ENSG00000174957	OR5J2	1	4	0.0228572
ENSG00000183695	MRGPRX2	1	4	0.0229652
ENSG00000138400	MDH1B	2	7	0.0232132
ENSG00000101251	SEL1L2	2	16	0.0232688
ENSG00000093000	NUP50	1	3	0.0233129
ENSG00000188001	TPRG1	1	3	0.0233742
ENSG00000178732	GP5	1	4	0.0233868
ENSG00000151079	KCNA6	1	3	0.0235072
ENSG00000174292	TNK1	2	16	0.0235614
ENSG00000106780	MEGF9	1	5	0.0236532
ENSG00000143919	CAMKMT	1	6	0.0236725
ENSG00000221933	OR2A25	1	4	0.023733
ENSG00000145715	RASA1	1	6	0.0237909
ENSG00000100941	PNN	2	16	0.0238507
ENSG00000237515	SHISA9	1	3	0.023851
ENSG00000140623	SEPTIN12	2	16	0.0239957
ENSG00000133275	CSNK1G2	1	3	0.0241615
ENSG00000104824	HNRNPL	1	3	0.0243399
ENSG00000131668	BARX1	1	4	0.0244961
ENSG00000169682	SPNS1	2	13	0.0244982
ENSG00000163507	CIP2A	2	16	0.0245641
ENSG00000140323	DISP2	2	16	0.0246092
ENSG00000156006	NAT2	1	4	0.0246101
ENSG00000124733	MEA1	1	4	0.024679
ENSG00000196776	CD47	1	4	0.0248011
ENSG00000162576	MXRA8	1	5	0.0248636
ENSG00000116871	MAP7D1	2	15	0.02496
ENSG00000168131	OR2B2	1	4	0.0250326
ENSG00000102900	NUP93	3	26	0.0250692
ENSG00000116857	TMEM9	1	4	0.0251057
ENSG00000187021	PNLIPRP1	2	14	0.0251788
ENSG00000143515	ATP8B2	3	30	0.0253922
ENSG00000112941	TENT4A	1	5	0.0253977
ENSG00000189325	BNIP5	1	5	0.0256642
ENSG00000077420	APBB1IP	1	5	0.0256649
ENSG00000144668	ITGA9	2	18	0.0258759
ENSG00000101849	TBL1X	1	4	0.0260041
ENSG00000101181	MTG2	1	4	0.0260041
ENSG00000101327	PDYN	1	4	0.0260052
ENSG00000176473	WDR25	2	11	0.0260642
ENSG00000163291	PAQR3	1	5	0.0261247
ENSG00000078579	FGF20	1	3	0.0262898
ENSG00000119147	ECRG4	1	3	0.0263559
ENSG00000119523	ALG2	1	4	0.0263648
ENSG00000176024	ZNF613	1	4	0.0263747
ENSG00000186272	ZNF17	1	3	0.0263754
ENSG00000122122	SASH3	1	5	0.0263916
ENSG00000146267	FAXC	1	4	0.0264466
ENSG00000138639	ARHGAP24	2	17	0.0266148
ENSG00000196576	PLXNB2	3	34	0.0267499
ENSG00000112902	SEMA5A	3	32	0.0268352
ENSG00000060749	QSER1	2	17	0.0268582
ENSG00000189171	S100A13	1	3	0.0268834
ENSG00000172464	OR5AP2	1	4	0.026941
ENSG00000186723	OR10H1	1	3	0.0269619
ENSG00000105248	YJU2	1	5	0.027021
ENSG00000151023	ENKUR	1	4	0.0270482
ENSG00000177731	FLII	4	52	0.0270574
ENSG00000144893	MED12L	3	31	0.0272173
ENSG00000078747	ITCH	1	6	0.0273237
ENSG00000089220	PEBP1	1	4	0.027408
ENSG00000122140	MRPS2	1	4	0.0274221
ENSG00000163617	CCDC191	2	15	0.0274589
ENSG00000185915	KLHL34	1	4	0.0274656
ENSG00000170162	VGLL2	1	5	0.0274952
ENSG00000033011	ALG1	1	4	0.027496
ENSG00000064195	DLX3	1	6	0.0274983
ENSG00000006047	YBX2	1	6	0.0276052
ENSG00000099337	KCNK6	1	2	0.0276112
ENSG00000176182	MYPOP	1	5	0.0276953
ENSG00000242173	ARHGDIG	1	5	0.0276989
ENSG00000131149	GSE1	4	56	0.0277478
ENSG00000142185	TRPM2	4	48	0.0277554
ENSG00000171860	C3AR1	1	5	0.0277726
ENSG00000120784	ZFP30	1	4	0.0278231
ENSG00000110583	NAA40	1	3	0.0278962
ENSG00000187098	MITF	2	15	0.0278964
ENSG00000161911	TREML1	1	4	0.0279249
ENSG00000089041	P2RX7	2	13	0.0280821
ENSG00000136897	MRPL50	1	5	0.0281123
ENSG00000254521	SIGLEC12	1	3	0.0281524
ENSG00000180008	SOCS4	1	4	0.0281872
ENSG00000125826	RBCK1	2	16	0.0283403
ENSG00000102901	CENPT	2	17	0.0284116
ENSG00000141527	CARD14	2	21	0.0284886
ENSG00000179761	PIPOX	1	5	0.0285125
ENSG00000154124	OTULIN	1	5	0.0285186
ENSG00000145708	CRHBP	1	6	0.0285525
ENSG00000121577	POPDC2	1	5	0.0285922
ENSG00000186038	HTR3E	1	3	0.0286402
ENSG00000144218	AFF3	2	17	0.0286812
ENSG00000102977	ACD	1	3	0.0287567
ENSG00000140876	NUDT7	1	5	0.0289117
ENSG00000162889	MAPKAPK2	1	3	0.028949
ENSG00000140386	SCAPER	2	18	0.0290083
ENSG00000085644	ZNF213	1	3	0.0291182
ENSG00000159352	PSMD4	1	4	0.0291742
ENSG00000162191	UBXN1	1	4	0.0293016
ENSG00000168702	LRP1B	6	104	0.0293776
ENSG00000135747	ZNF670-ZNF695	1	2	0.0294254
ENSG00000182902	SLC25A18	1	5	0.0294509
ENSG00000132952	USPL1	1	2	0.029533
ENSG00000095209	TMEM38B	1	5	0.0295334
ENSG00000122194	PLG	2	20	0.0295501
ENSG00000166452	AKIP1	1	6	0.0296288
ENSG00000036473	OTC	1	4	0.0296962
ENSG00000132466	ANKRD17	2	20	0.0298038
ENSG00000170605	OR9K2	1	6	0.0299958
ENSG00000110090	CPT1A	2	19	0.030004
ENSG00000104142	VPS18	3	40	0.0300067
ENSG00000253506	NACA2	1	1	0.0300718
ENSG00000160213	CSTB	1	2	0.0301903
ENSG00000089351	GRAMD1A	2	16	0.030248
ENSG00000112208	BAG2	1	5	0.0303042
ENSG00000179532	DNHD1	5	92	0.0303305
ENSG00000115425	PECR	1	5	0.0304991
ENSG00000144802	NFKBIZ	1	6	0.0306307
ENSG00000162599	NFIA	1	5	0.030639
ENSG00000155313	USP25	2	15	0.0307265
ENSG00000173809	TDRD12	1	5	0.0307453
ENSG00000166482	MFAP4	1	6	0.030749
ENSG00000251692	PTX4	1	3	0.0307652
ENSG00000155100	OTUD6B	1	5	0.030853
ENSG00000124191	TOX2	2	20	0.0308706
ENSG00000118922	KLF12	1	6	0.0309265
ENSG00000213593	TMX2	1	5	0.0309978
ENSG00000170502	NUDT9	1	5	0.0310322
ENSG00000205927	OLIG2	1	4	0.0310322
ENSG00000099821	POLRMT	2	18	0.0311402
ENSG00000149089	APIP	1	4	0.0311556
ENSG00000159713	TPPP3	1	4	0.0311645
ENSG00000164039	BDH2	1	3	0.0311667
ENSG00000135316	SYNCRIP	1	5	0.0312543
ENSG00000170515	PA2G4	1	0	0.0313856
ENSG00000100417	PMM1	1	4	0.0315606
ENSG00000204262	COL5A2	3	30	0.0315674
ENSG00000130827	PLXNA3	3	36	0.0315807
ENSG00000172426	RSPH9	1	5	0.031632
ENSG00000174446	SNAPC5	1	4	0.0316897
ENSG00000168209	DDIT4	1	4	0.0317615
ENSG00000124541	RRP36	1	5	0.0317721
ENSG00000143942	CHAC2	2	13	0.0318046
ENSG00000183873	SCN5A	3	44	0.0319786
ENSG00000116044	NFE2L2	1	6	0.0320511
ENSG00000171174	RBKS	1	6	0.032116
ENSG00000116350	SRSF4	1	6	0.0321343
ENSG00000164535	DAGLB	2	21	0.0322595
ENSG00000173020	GRK2	1	5	0.0322884
ENSG00000164074	ABHD18	1	6	0.032358
ENSG00000117500	TMED5	1	7	0.0323686
ENSG00000162929	KIAA1841	2	18	0.0324858
ENSG00000147654	EBAG9	1	5	0.0325913
ENSG00000112559	MDFI	1	2	0.0326698
ENSG00000105135	ILVBL	2	19	0.0326811
ENSG00000197084	LCE1C	1	7	0.0327363
ENSG00000157404	KIT	2	16	0.0327623
ENSG00000101892	ATP1B4	1	5	0.0327646
ENSG00000153140	CETN3	1	4	0.0328959
ENSG00000175711	B3GNTL1	1	6	0.0330039
ENSG00000166220	TBATA	1	5	0.0331467
ENSG00000155324	GRAMD2B	1	4	0.0331739
ENSG00000100483	VCPKMT	1	3	0.0332532
ENSG00000255245	FXYD6-FXYD2	1	4	0.0333059
ENSG00000111262	KCNA1	1	6	0.0333448
ENSG00000143995	MEIS1	1	5	0.0334508
ENSG00000176105	YES1	1	5	0.0335778
ENSG00000182700	IGIP	1	3	0.0336417
ENSG00000162461	SLC25A34	1	5	0.0336507
ENSG00000103852	TTC23	2	16	0.0338057
ENSG00000166578	IQCD	1	5	0.0338112
ENSG00000134759	ELP2	2	16	0.0338573
ENSG00000128191	DGCR8	2	19	0.0339261
ENSG00000049769	PPP1R3F	1	5	0.0339353
ENSG00000091947	TMEM101	1	5	0.0339475
ENSG00000197019	SERTAD1	1	5	0.0340565
ENSG00000167720	SRR	1	5	0.0341629
ENSG00000137824	RMDN3	1	5	0.0341888
ENSG00000174498	IGDCC3	2	21	0.0342032
ENSG00000108773	KAT2A	1	6	0.0342158
ENSG00000110925	CSRNP2	2	20	0.0342488
ENSG00000167825	OR5I1	1	5	0.0343384
ENSG00000170430	MGMT	1	4	0.0343628
ENSG00000198056	PRIM1	1	3	0.0344186
ENSG00000092969	TGFB2	1	6	0.0345845
ENSG00000155719	OTOA	2	14	0.0346178
ENSG00000184292	TACSTD2	1	3	0.0347575
ENSG00000142186	SCYL1	2	16	0.0347615
ENSG00000161807	OR7G1	1	4	0.0347623
ENSG00000090989	EXOC1	2	14	0.0348326
ENSG00000152592	DMP1	1	6	0.0349378
ENSG00000001617	SEMA3F	2	19	0.0350578
ENSG00000038532	CLEC16A	3	35	0.0351463
ENSG00000123612	ACVR1C	1	2	0.0351746
ENSG00000170260	ZNF212	1	6	0.0351817
ENSG00000164144	ARFIP1	1	5	0.0352596
ENSG00000238243	OR2W3	1	4	0.0353674
ENSG00000135205	CCDC146	2	15	0.0354055
ENSG00000111679	PTPN6	1	6	0.035513
ENSG00000187806	TMEM202	1	3	0.0355185
ENSG00000178226	PRSS36	2	19	0.0355969
ENSG00000091542	ALKBH5	1	5	0.0356242
ENSG00000171604	CXXC5	1	5	0.0356799
ENSG00000185518	SV2B	2	19	0.0356887
ENSG00000139211	AMIGO2	1	5	0.0357764
ENSG00000114744	COMMD2	1	4	0.0358441
ENSG00000138750	NUP54	1	5	0.0361023
ENSG00000198015	MRPL42	1	4	0.0361099
ENSG00000163093	BBS5	1	6	0.0361693
ENSG00000048649	RSF1	2	19	0.0361913
ENSG00000141127	PRPSAP2	1	5	0.0362112
ENSG00000180884	ZNF792	1	6	0.0362328
ENSG00000082175	PGR	1	4	0.0363443
ENSG00000085741	WNT11	1	5	0.0364668
ENSG00000067113	PLPP1	1	7	0.0365308
ENSG00000172575	RASGRP1	2	17	0.0365883
ENSG00000167858	TEKT1	1	5	0.0365892
ENSG00000122986	HVCN1	1	6	0.0366479
ENSG00000005001	PRSS22	1	4	0.036653
ENSG00000168491	CCDC110	2	17	0.0367096
ENSG00000164754	RAD21	1	5	0.0367341
ENSG00000052841	TTC17	2	23	0.0368284
ENSG00000187778	MCRS1	1	4	0.036851
ENSG00000145860	RNF145	1	4	0.0369213
ENSG00000078808	SDF4	1	6	0.0369678
ENSG00000107140	TESK1	1	6	0.0369773
ENSG00000156150	ALX3	1	5	0.0371068
ENSG00000021762	OSBPL5	2	18	0.0371241
ENSG00000169242	EFNA1	1	6	0.037144
ENSG00000162623	TYW3	1	4	0.0371441
ENSG00000123609	NMI	1	5	0.0371768
ENSG00000174348	PODN	2	18	0.0373102
ENSG00000100227	POLDIP3	1	5	0.0373288
ENSG00000118496	FBXO30	1	6	0.0373772
ENSG00000100554	ATP6V1D	1	4	0.0373894
ENSG00000144645	OSBPL10	2	19	0.0374042
ENSG00000137462	TLR2	1	5	0.037587
ENSG00000144191	CNGA3	2	21	0.0377572
ENSG00000182687	GALR2	1	1	0.0378659
ENSG00000178772	CPN2	1	6	0.0380203
ENSG00000152784	PRDM8	1	6	0.0381294
ENSG00000100373	UPK3A	1	5	0.0381529
ENSG00000111052	LIN7A	1	4	0.0384287
ENSG00000019582	CD74	1	4	0.0385473
ENSG00000136888	ATP6V1G1	1	3	0.0386018
ENSG00000031698	SARS1	1	7	0.038675
ENSG00000162771	FAM71A	1	4	0.0387793
ENSG00000151577	DRD3	1	3	0.0387829
ENSG00000162630	B3GALT2	1	5	0.0388983
ENSG00000186205	MTARC1	1	6	0.0389318
ENSG00000188984	AADACL3	1	6	0.0389757
ENSG00000180785	OR51E1	1	5	0.0390152
ENSG00000117724	CENPF	4	53	0.0390917
ENSG00000103111	MON1B	1	6	0.039126
ENSG00000205683	DPF3	1	6	0.0393089
ENSG00000115252	PDE1A	1	7	0.0393253
ENSG00000091181	IL5RA	1	5	0.0393549
ENSG00000109805	NCAPG	1	7	0.0394348
ENSG00000158796	DEDD	1	7	0.0398503
ENSG00000174943	KCTD13	1	8	0.0398561
ENSG00000169641	LUZP1	2	19	0.0398951
ENSG00000167543	TP53I13	1	6	0.0399101
ENSG00000184677	ZBTB40	2	18	0.0399252
ENSG00000181444	ZNF467	1	5	0.0399629
ENSG00000131732	ZCCHC9	1	6	0.0399736
ENSG00000104320	NBN	2	18	0.0399934
ENSG00000108352	RAPGEFL1	1	5	0.0400096
ENSG00000128606	LRRC17	1	6	0.0400104
ENSG00000073969	NSF	1	6	0.0400351
ENSG00000107295	SH3GL2	1	7	0.0401007
ENSG00000186912	P2RY4	1	9	0.040129
ENSG00000138385	SSB	1	4	0.0401741
ENSG00000171766	GATM	1	7	0.0401884
ENSG00000137673	MMP7	1	4	0.0402195
ENSG00000173039	RELA	1	5	0.0402243
ENSG00000166411	IDH3A	1	7	0.0402716
ENSG00000168779	SHOX2	1	6	0.040323
ENSG00000181982	CCDC149	1	7	0.0404722
ENSG00000127993	RBM48	1	7	0.0405168
ENSG00000058085	LAMC2	2	23	0.0406386
ENSG00000214681	IQCF5	1	5	0.0407085
ENSG00000140563	MCTP2	3	39	0.0410351
ENSG00000170836	PPM1D	1	6	0.0410429
ENSG00000165689	ENTR1	2	18	0.0410535
ENSG00000013588	GPRC5A	1	4	0.0411157
ENSG00000076248	UNG	1	6	0.0411999
ENSG00000104825	NFKBIB	1	6	0.0412865
ENSG00000137868	STRA6	2	22	0.041294
ENSG00000095380	NANS	1	3	0.0413172
ENSG00000160803	UBQLN4	1	6	0.0413821
ENSG00000172208	OR4X2	1	5	0.041396
ENSG00000111057	KRT18	1	6	0.041423
ENSG00000129159	KCNC1	1	6	0.0414333
ENSG00000198670	LPA	2	25	0.0414864
ENSG00000164841	TMEM74	1	8	0.0415683
ENSG00000135617	PRADC1	1	5	0.0416345
ENSG00000101890	GUCY2F	1	6	0.0417149
ENSG00000197905	TEAD4	1	7	0.0417343
ENSG00000086200	IPO11	2	21	0.0417565
ENSG00000149100	EIF3M	1	6	0.0418415
ENSG00000112796	ENPP5	1	4	0.0419025
ENSG00000164327	RICTOR	2	21	0.0421031
ENSG00000107959	PITRM1	2	19	0.0421469
ENSG00000233436	BTBD18	1	4	0.0421629
ENSG00000102882	MAPK3	1	3	0.0422013
ENSG00000164418	GRIK2	1	7	0.0422502
ENSG00000124795	DEK	1	5	0.0422693
ENSG00000146378	TAAR2	1	7	0.0423049
ENSG00000169344	UMOD	1	7	0.0423188
ENSG00000121900	TMEM54	1	7	0.0423427
ENSG00000146833	TRIM4	1	6	0.0426715
ENSG00000204010	IFIT1B	1	2	0.0429427
ENSG00000197912	SPG7	2	21	0.0430242
ENSG00000120162	MOB3B	1	5	0.0430388
ENSG00000167895	TMC8	2	17	0.0430951
ENSG00000176783	RUFY1	1	7	0.0433445
ENSG00000136381	IREB2	1	6	0.0433687
ENSG00000156535	CD109	2	19	0.04339
ENSG00000152240	HAUS1	1	6	0.0434153
ENSG00000167676	PLIN4	2	17	0.0434289
ENSG00000110002	VWA5A	2	23	0.043474
ENSG00000100418	DESI1	1	5	0.0436752
ENSG00000143196	DPT	1	5	0.0436832
ENSG00000103740	ACSBG1	1	6	0.0438117
ENSG00000114021	NIT2	1	4	0.0440868
ENSG00000188295	ZNF669	1	2	0.0442467
ENSG00000138593	SECISBP2L	2	22	0.0444276
ENSG00000196878	LAMB3	3	43	0.0444528
ENSG00000160207	HSF2BP	1	6	0.0445112
ENSG00000135912	TTLL4	3	35	0.0446631
ENSG00000119125	GDA	1	6	0.0448175
ENSG00000183091	NEB	11	255	0.044853
ENSG00000149488	TMC2	2	14	0.0449496
ENSG00000013441	CLK1	1	7	0.044952
ENSG00000186049	KRT73	2	18	0.044995
ENSG00000125775	SDCBP2	1	5	0.0451949
ENSG00000184454	NCMAP	1	2	0.045288
ENSG00000115507	OTX1	1	6	0.0453054
ENSG00000162460	TMEM82	1	3	0.0453321
ENSG00000198373	WWP2	2	20	0.0453508
ENSG00000156171	DRAM2	1	7	0.0453916
ENSG00000148730	EIF4EBP2	1	6	0.0453991
ENSG00000112305	SMAP1	1	6	0.0455369
ENSG00000189001	SBSN	1	5	0.0455461
ENSG00000143373	ZNF687	2	16	0.0456152
ENSG00000110107	PRPF19	1	7	0.0456587
ENSG00000129472	RAB2B	1	5	0.0457048
ENSG00000197142	ACSL5	1	6	0.0457169
ENSG00000102984	ZNF821	1	5	0.0457495
ENSG00000131730	CKMT2	1	7	0.0457898
ENSG00000101255	TRIB3	1	7	0.0458004
ENSG00000087157	PGS1	1	7	0.0458129
ENSG00000150764	DIXDC1	1	8	0.0458469
ENSG00000168026	TTC21A	2	23	0.0458786
ENSG00000239282	CASTOR1	1	7	0.0461782
ENSG00000079277	MKNK1	1	8	0.0462356
ENSG00000009765	IYD	1	7	0.0462652
ENSG00000204991	SPIRE2	2	22	0.0462815
ENSG00000166278	C2	2	19	0.0462829
ENSG00000134571	MYBPC3	3	44	0.0463426
ENSG00000091129	NRCAM	2	20	0.046347
ENSG00000138433	CIR1	1	3	0.0463519
ENSG00000160282	FTCD	2	20	0.0464498
ENSG00000141337	ARSG	2	21	0.0464548
ENSG00000184508	HDDC3	1	9	0.0464877
ENSG00000137713	PPP2R1B	2	18	0.0465389
ENSG00000205339	IPO7	1	5	0.046588
ENSG00000175550	DRAP1	1	7	0.046673
ENSG00000079387	SENP1	1	7	0.0467999
ENSG00000136243	NUP42	1	5	0.0468421
ENSG00000155827	RNF20	2	20	0.0468865
ENSG00000108883	EFTUD2	2	16	0.0470047
ENSG00000197496	SLC2A10	1	5	0.0470187
ENSG00000095321	CRAT	2	22	0.0470246
ENSG00000142102	PGGHG	2	24	0.0471477
ENSG00000185813	PCYT2	1	7	0.0473017
ENSG00000148700	ADD3	2	21	0.0473151
ENSG00000066739	ATG2B	3	35	0.0473213
ENSG00000129990	SYT5	1	6	0.04739
ENSG00000166068	SPRED1	1	3	0.047465
ENSG00000169230	PRELID1	1	6	0.0474678
ENSG00000249115	HAUS5	1	7	0.0475307
ENSG00000105058	FAM32A	1	6	0.0475308
ENSG00000076321	KLHL20	1	7	0.0475309
ENSG00000130714	POMT1	2	15	0.0475454
ENSG00000183287	CCBE1	2	21	0.047785
ENSG00000135999	EPC2	1	7	0.0477963
ENSG00000124104	SNX21	1	6	0.0478338
ENSG00000103248	MTHFSD	1	7	0.0479455
ENSG00000161298	ZNF382	1	5	0.0479503
ENSG00000168393	DTYMK	1	4	0.0479622
ENSG00000115053	NCL	1	9	0.0479948
ENSG00000099810	MTAP	1	8	0.0479997
ENSG00000196872	CRACDL	1	7	0.0481973
ENSG00000152430	BOLL	1	4	0.0482496
ENSG00000100353	EIF3D	1	7	0.0483428
ENSG00000119508	NR4A3	1	5	0.0484046
ENSG00000176438	SYNE3	2	22	0.0484268
ENSG00000023697	DERA	1	6	0.0484771
ENSG00000172349	IL16	2	23	0.0485073
ENSG00000147100	SLC16A2	1	7	0.0485079
ENSG00000187079	TEAD1	1	6	0.0486968
ENSG00000181031	RPH3AL	1	8	0.048737
ENSG00000063978	RNF4	1	2	0.0487383
ENSG00000118096	IFT46	1	7	0.0487384
ENSG00000173545	ZNF622	1	5	0.0487488
ENSG00000105971	CAV2	1	7	0.0488543
ENSG00000131771	PPP1R1B	1	5	0.0489389
ENSG00000196653	ZNF502	1	6	0.0489613
ENSG00000157353	FCSK	3	46	0.0490733
ENSG00000124507	PACSIN1	1	4	0.0491052
ENSG00000082641	NFE2L1	2	23	0.0491783
ENSG00000148377	IDI2	1	6	0.0493606
ENSG00000161542	PRPSAP1	1	5	0.0494123
ENSG00000167302	TEPSIN	1	6	0.0494248
ENSG00000175143	OR2T1	1	7	0.0494902
ENSG00000178645	C10orf53	1	4	0.0496119
ENSG00000101972	STAG2	1	6	0.0496658
ENSG00000030582	GRN	1	7	0.049722
ENSG00000243284	VSIG8	1	9	0.049762
ENSG00000126787	DLGAP5	1	8	0.0497998
ENSG00000147145	LPAR4	1	6	0.049841
ENSG00000165905	LARGE2	2	18	0.0500211
ENSG00000178927	CYBC1	1	4	0.0500392
ENSG00000162924	REL	1	7	0.0500442
ENSG00000001630	CYP51A1	1	7	0.0500981
ENSG00000178538	CA8	1	4	0.050241
ENSG00000182040	USH1G	1	6	0.0504884
ENSG00000012232	EXTL3	2	21	0.0505179
ENSG00000157216	SSBP3	1	7	0.0505302
ENSG00000019995	ZRANB1	1	8	0.0505627
ENSG00000162552	WNT4	1	7	0.0506393
ENSG00000082258	CCNT2	1	9	0.0506586
ENSG00000198182	ZNF607	1	6	0.0508741
ENSG00000239779	WBP1	1	7	0.0509386
ENSG00000205832	C16orf96	1	8	0.0509891
ENSG00000115661	STK16	1	6	0.0510709
ENSG00000103365	GGA2	2	22	0.0510885
ENSG00000127720	METTL25	1	5	0.0512117
ENSG00000101871	MID1	1	5	0.0512366
ENSG00000205784	ARRDC5	1	6	0.051306
ENSG00000138032	PPM1B	1	9	0.0513239
ENSG00000130726	TRIM28	1	6	0.0514164
ENSG00000128815	WDFY4	3	46	0.0514713
ENSG00000183155	RABIF	1	7	0.0516868
ENSG00000118900	UBN1	2	22	0.0517075
ENSG00000145861	C1QTNF2	1	7	0.0517314
ENSG00000167757	KLK11	1	6	0.0517928
ENSG00000167107	ACSF2	2	21	0.0518897
ENSG00000104361	NIPAL2	1	8	0.0519771
ENSG00000182533	CAV3	1	7	0.0520121
ENSG00000213186	TRIM59	1	8	0.0522544
ENSG00000165752	STK32C	1	7	0.0522835
ENSG00000008130	NADK	1	7	0.0522964
ENSG00000170921	TANC2	3	48	0.0523028
ENSG00000188981	MSANTD1	1	6	0.0523668
ENSG00000168010	ATG16L2	1	7	0.0524723
ENSG00000178235	SLITRK1	1	8	0.0525603
ENSG00000141756	FKBP10	1	8	0.0526244
ENSG00000144488	ESPNL	1	9	0.0527193
ENSG00000104427	ZC2HC1A	1	8	0.0527271
ENSG00000128274	A4GALT	1	8	0.0529439
ENSG00000103037	SETD6	1	8	0.0530102
ENSG00000108759	KRT32	1	6	0.0530151
ENSG00000163254	CRYGC	1	6	0.0530949
ENSG00000186815	TPCN1	2	25	0.0531114
ENSG00000177868	SVBP	1	3	0.0531118
ENSG00000149054	ZNF215	1	5	0.0531808
ENSG00000131828	PDHA1	1	3	0.0532269
ENSG00000170419	VSTM2A	1	5	0.0532287
ENSG00000100461	RBM23	2	23	0.0532904
ENSG00000137274	BPHL	1	3	0.053439
ENSG00000203965	EFCAB7	1	2	0.0535063
ENSG00000171298	GAA	2	26	0.0535219
ENSG00000174156	GSTA3	1	5	0.0535296
ENSG00000149292	TTC12	2	23	0.0535422
ENSG00000086696	HSD17B2	1	9	0.053554
ENSG00000113205	PCDHB3	1	7	0.0536948
ENSG00000116703	PDC	1	6	0.0537209
ENSG00000186197	EDARADD	1	7	0.0537631
ENSG00000197299	BLM	3	41	0.0538305
ENSG00000185379	RAD51D	1	7	0.0538828
ENSG00000135114	OASL	1	5	0.0538831
ENSG00000163793	DNAJC5G	1	2	0.0539038
ENSG00000055044	NOP58	1	8	0.0540343
ENSG00000168701	TMEM208	1	7	0.0541095
ENSG00000169249	ZRSR2	1	6	0.0541444
ENSG00000114120	SLC25A36	1	8	0.0542004
ENSG00000160216	AGPAT3	1	7	0.0542492
ENSG00000184838	PRR16	1	6	0.0543006
ENSG00000172578	KLHL6	2	20	0.0543048
ENSG00000145623	OSMR	1	7	0.0544394
ENSG00000054965	FAM168A	1	5	0.0547163
ENSG00000151164	RAD9B	1	4	0.0547772
ENSG00000083896	YTHDC1	1	8	0.0548354
ENSG00000089847	ANKRD24	2	24	0.0548647
ENSG00000184402	SS18L1	1	10	0.0548734
ENSG00000160183	TMPRSS3	1	6	0.0549391
ENSG00000172497	ACOT12	2	21	0.0550751
ENSG00000185002	RFX6	1	9	0.0550883
ENSG00000168418	KCNG4	2	23	0.0551049
ENSG00000146409	SLC18B1	1	9	0.055142
ENSG00000158955	WNT9B	1	9	0.0552682
ENSG00000105131	EPHX3	1	9	0.0553763
ENSG00000130208	APOC1	1	3	0.0554003
ENSG00000124253	PCK1	2	24	0.0554367
ENSG00000136404	TM6SF1	1	8	0.0554733
ENSG00000215883	CYB5RL	1	9	0.05564
ENSG00000054611	TBC1D22A	1	9	0.0556686
ENSG00000148339	SLC25A25	1	7	0.055733
ENSG00000169398	PTK2	2	24	0.0557405
ENSG00000079150	FKBP7	1	8	0.0557764
ENSG00000116266	STXBP3	1	8	0.055782
ENSG00000163946	TASOR	1	7	0.0558274
ENSG00000162613	FUBP1	1	7	0.0558433
ENSG00000171747	LGALS4	1	5	0.0559267
ENSG00000165156	ZHX1	1	8	0.056016
ENSG00000088833	NSFL1C	1	8	0.0560603
ENSG00000221890	NPTXR	1	6	0.0561022
ENSG00000167080	B4GALNT2	1	7	0.0561121
ENSG00000173611	SCAI	1	9	0.0562412
ENSG00000183032	SLC25A21	1	5	0.0562414
ENSG00000155096	AZIN1	1	8	0.0563598
ENSG00000185670	ZBTB3	1	7	0.0563747
ENSG00000166265	CYYR1	1	7	0.0564162
ENSG00000171202	TMEM126A	1	5	0.0564512
ENSG00000102471	NDFIP2	1	7	0.0565199
ENSG00000116761	CTH	1	8	0.0566171
ENSG00000101187	SLCO4A1	1	9	0.0566384
ENSG00000158711	ELK4	1	10	0.056793
ENSG00000139546	TARBP2	1	7	0.0568163
ENSG00000112584	FAM120B	1	7	0.0569045
ENSG00000157343	ARMC12	1	9	0.0569197
ENSG00000138606	SHF	1	6	0.0570162
ENSG00000139266	MARCHF9	1	5	0.0571773
ENSG00000163449	TMEM169	1	4	0.057199
ENSG00000156475	PPP2R2B	1	7	0.0572525
ENSG00000141030	COPS3	1	7	0.0573606
ENSG00000105767	CADM4	1	8	0.0574054
ENSG00000147687	TATDN1	1	7	0.0574112
ENSG00000187605	TET3	2	13	0.0574261
ENSG00000165416	SUGT1	1	5	0.057591
ENSG00000106128	GHRHR	1	8	0.0576422
ENSG00000186297	GABRA5	1	7	0.0577049
ENSG00000125813	PAX1	1	7	0.0577322
ENSG00000121691	CAT	2	24	0.0578823
ENSG00000018280	SLC11A1	2	22	0.0579266
ENSG00000187531	SIRT7	1	8	0.0579317
ENSG00000115267	IFIH1	4	56	0.0579521
ENSG00000137497	NUMA1	3	44	0.0580033
ENSG00000130377	ACSBG2	1	8	0.0580452
ENSG00000137968	SLC44A5	1	8	0.0580502
ENSG00000072954	TMEM38A	1	7	0.0581049
ENSG00000112079	STK38	1	8	0.0581272
ENSG00000108654	DDX5	1	9	0.0581951
ENSG00000103647	CORO2B	1	7	0.058387
ENSG00000196865	NHLRC2	1	7	0.0583883
ENSG00000171316	CHD7	4	58	0.0586273
ENSG00000080815	PSEN1	1	4	0.0586648
ENSG00000116885	OSCP1	1	7	0.0587005
ENSG00000064115	TM7SF3	1	7	0.0588038
ENSG00000175505	CLCF1	1	10	0.0589203
ENSG00000049541	RFC2	1	8	0.0589601
ENSG00000141570	CBX8	1	8	0.0590324
ENSG00000124743	KLHL31	2	26	0.0591243
ENSG00000128513	POT1	1	8	0.0592153
ENSG00000003987	MTMR7	2	22	0.0593063
ENSG00000162746	FCRLB	1	7	0.0593071
ENSG00000171819	ANGPTL7	1	8	0.0593386
ENSG00000090861	AARS1	2	28	0.0593653
ENSG00000253537	PCDHGA7	2	18	0.059414
ENSG00000119900	OGFRL1	1	6	0.0597184
ENSG00000090776	EFNB1	1	4	0.0598042
ENSG00000083857	FAT1	6	112	0.0598085
ENSG00000185385	OR7A17	1	3	0.0598752
ENSG00000147862	NFIB	1	9	0.0599261
ENSG00000107338	SHB	1	8	0.0599322
ENSG00000113448	PDE4D	1	7	0.0599533
ENSG00000144827	ABHD10	1	9	0.0599876
ENSG00000011105	TSPAN9	1	6	0.0600719
ENSG00000161999	JMJD8	1	7	0.0601254
ENSG00000196531	NACA	1	7	0.0601394
ENSG00000138378	STAT4	1	8	0.0601976
ENSG00000103343	ZNF174	1	9	0.0602306
ENSG00000182446	NPLOC4	1	8	0.0603151
ENSG00000127325	BEST3	1	9	0.060424
ENSG00000118407	FILIP1	2	22	0.0607236
ENSG00000204852	TCTN1	1	8	0.0607592
ENSG00000172680	MOS	1	7	0.0608807
ENSG00000103415	HMOX2	1	9	0.060967
ENSG00000119718	EIF2B2	1	6	0.0611172
ENSG00000132467	UTP3	1	6	0.0611712
ENSG00000140265	ZSCAN29	2	26	0.0611741
ENSG00000174197	MGA	3	45	0.0612182
ENSG00000172794	RAB37	1	7	0.0612193
ENSG00000123908	AGO2	1	7	0.0612356
ENSG00000241935	HOGA1	2	24	0.0612558
ENSG00000186710	CFAP73	1	6	0.0612613
ENSG00000121274	TENT4B	1	7	0.0612985
ENSG00000143476	DTL	1	7	0.0613439
ENSG00000175294	CATSPER1	1	8	0.0613808
ENSG00000189195	BTBD8	1	7	0.0613975
ENSG00000215203	GRXCR1	1	7	0.0614322
ENSG00000179988	PSTK	1	9	0.0615113
ENSG00000170743	SYT9	1	8	0.0615926
ENSG00000151150	ANK3	4	66	0.0618162
ENSG00000086288	NME8	1	10	0.0618503
ENSG00000117394	SLC2A1	1	7	0.0620289
ENSG00000187522	HSPA14	1	7	0.0620674
ENSG00000169908	TM4SF1	1	8	0.0623766
ENSG00000141639	MAPK4	1	9	0.0625223
ENSG00000092108	SCFD1	2	26	0.0625274
ENSG00000144152	FBLN7	1	9	0.0625868
ENSG00000198792	TMEM184B	1	6	0.0626465
ENSG00000134243	SORT1	1	7	0.0626753
ENSG00000172594	SMPDL3A	1	9	0.0626988
ENSG00000078549	ADCYAP1R1	1	6	0.0627035
ENSG00000168591	TMUB2	1	7	0.0627349
ENSG00000167112	TRUB2	1	7	0.0627622
ENSG00000127837	AAMP	1	10	0.0628172
ENSG00000008838	MED24	2	24	0.0628739
ENSG00000123191	ATP7B	3	47	0.0628756
ENSG00000137842	TMEM62	1	8	0.0629451
ENSG00000089127	OAS1	1	7	0.0630744
ENSG00000131864	USP29	1	8	0.063218
ENSG00000166387	PPFIBP2	2	25	0.0633365
ENSG00000136807	CDK9	1	7	0.0634238
ENSG00000105723	GSK3A	1	10	0.0638213
ENSG00000166136	NDUFB8	1	6	0.0638823
ENSG00000151612	ZNF827	2	27	0.0639213
ENSG00000138115	CYP2C8	1	8	0.06394
ENSG00000143369	ECM1	2	22	0.0639525
ENSG00000167916	KRT24	1	9	0.0640474
ENSG00000139508	SLC46A3	1	8	0.0640509
ENSG00000181291	TMEM132E	2	24	0.0640918
ENSG00000171049	FPR2	1	10	0.0641564
ENSG00000101204	CHRNA4	2	20	0.0641698
ENSG00000125485	DDX31	2	26	0.0642106
ENSG00000164053	ATRIP	1	9	0.0642705
ENSG00000128908	INO80	3	44	0.0643405
ENSG00000204264	PSMB8	1	7	0.0644001
ENSG00000134247	PTGFRN	1	7	0.0644717
ENSG00000070814	TCOF1	2	24	0.0645602
ENSG00000141279	NPEPPS	1	6	0.064569
ENSG00000165782	PIP4P1	1	7	0.064682
ENSG00000150867	PIP4K2A	1	7	0.064722
ENSG00000163703	CRELD1	1	8	0.0647499
ENSG00000183570	PCBP3	1	7	0.0647798
ENSG00000109452	INPP4B	2	21	0.0648945
ENSG00000171612	SLC25A33	1	7	0.0649724
ENSG00000196569	LAMA2	5	89	0.0650373
ENSG00000148841	ITPRIP	1	8	0.0651335
ENSG00000187800	PEAR1	2	29	0.0652384
ENSG00000160161	CILP2	1	10	0.0652709
ENSG00000204439	C6orf47	1	9	0.0654548
ENSG00000160753	RUSC1	1	9	0.0655417
ENSG00000110900	TSPAN11	1	10	0.0655886
ENSG00000129152	MYOD1	1	9	0.0657079
ENSG00000115211	EIF2B4	1	7	0.0657943
ENSG00000068354	TBC1D25	1	9	0.0657955
ENSG00000232070	TMEM253	1	8	0.0658658
ENSG00000133135	RNF128	1	6	0.0658689
ENSG00000197901	SLC22A6	1	9	0.0658841
ENSG00000141338	ABCA8	2	24	0.0659107
ENSG00000110801	PSMD9	1	8	0.0661195
ENSG00000165621	OXGR1	1	11	0.0662821
ENSG00000130511	SSBP4	1	10	0.0662904
ENSG00000128652	HOXD3	1	7	0.0665003
ENSG00000135926	TMBIM1	1	9	0.0665027
ENSG00000079557	AFM	1	8	0.0665273
ENSG00000157911	PEX10	1	9	0.0666236
ENSG00000124688	MAD2L1BP	1	8	0.0666604
ENSG00000143954	REG3G	1	5	0.0667478
ENSG00000092931	MFSD11	1	7	0.0668491
ENSG00000181038	METTL23	1	9	0.0668551
ENSG00000090266	NDUFB2	1	8	0.0668846
ENSG00000151491	EPS8	2	28	0.0669495
ENSG00000175600	SUGCT	1	8	0.067062
ENSG00000076043	REXO2	1	7	0.0671794
ENSG00000124444	ZNF576	1	8	0.0671855
ENSG00000114378	HYAL1	1	9	0.0672244
ENSG00000112651	MRPL2	1	8	0.0672798
ENSG00000170464	DNAJC18	1	9	0.0673344
ENSG00000173200	PARP15	1	8	0.0673604
ENSG00000171729	TMEM51	1	9	0.0673958
ENSG00000172568	FNDC9	1	7	0.0674622
ENSG00000163017	ACTG2	1	8	0.0674811
ENSG00000092295	TGM1	2	27	0.067563
ENSG00000122705	CLTA	1	8	0.0675766
ENSG00000105708	ZNF14	1	9	0.0676021
ENSG00000214435	AS3MT	1	9	0.0676647
ENSG00000235109	ZSCAN31	1	5	0.0676664
ENSG00000198837	DENND4B	2	26	0.0676924
ENSG00000148399	DPH7	1	9	0.0679185
ENSG00000141664	ZCCHC2	1	8	0.0680048
ENSG00000166086	JAM3	1	10	0.0681792
ENSG00000185156	MFSD6L	1	9	0.0684607
ENSG00000101442	ACTR5	1	8	0.0684842
ENSG00000158477	CD1A	1	8	0.0685727
ENSG00000160685	ZBTB7B	1	5	0.0685779
ENSG00000003400	CASP10	1	8	0.068595
ENSG00000157119	KLHL40	1	7	0.0686255
ENSG00000144161	ZC3H8	1	7	0.0686739
ENSG00000115942	ORC2	1	8	0.0686794
ENSG00000110171	TRIM3	1	7	0.0687374
ENSG00000188050	RNF133	1	3	0.0687516
ENSG00000151687	ANKAR	2	26	0.0688085
ENSG00000041880	PARP3	1	9	0.0688534
ENSG00000251503	CENPS-CORT	1	7	0.0688855
ENSG00000214655	ZSWIM8	2	28	0.0691388
ENSG00000177728	TMEM94	2	24	0.0693157
ENSG00000011347	SYT7	1	9	0.06949
ENSG00000171827	ZNF570	1	7	0.0695154
ENSG00000186335	SLC36A2	1	8	0.0695939
ENSG00000145907	G3BP1	1	8	0.069625
ENSG00000135392	DNAJC14	1	8	0.0697517
ENSG00000168792	ABHD15	1	8	0.0697586
ENSG00000105672	ETV2	1	8	0.069783
ENSG00000136273	HUS1	1	9	0.0698271
ENSG00000185880	TRIM69	1	10	0.0698331
ENSG00000175352	NRIP3	1	8	0.0700447
ENSG00000112576	CCND3	1	7	0.0700872
ENSG00000118898	PPL	3	45	0.0701264
ENSG00000186529	CYP4F3	1	10	0.0701641
ENSG00000006007	GDE1	1	10	0.0701657
ENSG00000198369	SPRED2	1	10	0.0702151
ENSG00000129744	ART1	1	9	0.0703307
ENSG00000083123	BCKDHB	1	8	0.0703565
ENSG00000204897	KRT25	2	24	0.0703857
ENSG00000125266	EFNB2	1	11	0.0704232
ENSG00000182013	PNMA8A	1	6	0.0704541
ENSG00000171840	NINJ2	1	10	0.0705767
ENSG00000106436	MYL10	1	6	0.0708756
ENSG00000182158	CREB3L2	1	10	0.0708834
ENSG00000134207	SYT6	1	9	0.0709135
ENSG00000144747	TMF1	1	10	0.0712236
ENSG00000120708	TGFBI	2	30	0.0712558
ENSG00000159208	CIART	1	7	0.0713334
ENSG00000128881	TTBK2	2	27	0.0713982
ENSG00000005249	PRKAR2B	1	9	0.0714886
ENSG00000172459	OR5AR1	1	7	0.0714927
ENSG00000165379	LRFN5	1	8	0.0716191
ENSG00000214097	SMCO1	1	6	0.0716268
ENSG00000149489	ROM1	1	7	0.0716658
ENSG00000163141	BNIPL	1	10	0.0717395
ENSG00000164068	RNF123	2	24	0.0717662
ENSG00000134817	APLNR	1	9	0.07187
ENSG00000100296	THOC5	1	8	0.0718904
ENSG00000164151	ICE1	1	9	0.0719344
ENSG00000075413	MARK3	1	10	0.0720349
ENSG00000069329	VPS35	1	3	0.0720897
ENSG00000179772	FOXS1	1	11	0.0721541
ENSG00000104723	TUSC3	1	9	0.0721604
ENSG00000133104	SPART	1	9	0.0721838
ENSG00000177103	DSCAML1	3	48	0.0722961
ENSG00000128271	ADORA2A	1	10	0.0723217
ENSG00000124299	PEPD	2	28	0.0723357
ENSG00000092445	TYRO3	1	9	0.0724799
ENSG00000117472	TSPAN1	1	10	0.0725352
ENSG00000188283	ZNF383	1	8	0.0725981
ENSG00000121680	PEX16	1	8	0.072654
ENSG00000055609	KMT2C	3	50	0.0726674
ENSG00000151116	UEVLD	1	10	0.0726757
ENSG00000173705	SUSD5	1	8	0.0726916
ENSG00000105255	FSD1	1	8	0.0727755
ENSG00000135341	MAP3K7	1	9	0.072817
ENSG00000141526	SLC16A3	1	12	0.0729251
ENSG00000213085	CFAP45	2	20	0.0729268
ENSG00000166821	PEX11A	1	9	0.0729694
ENSG00000135624	CCT7	1	9	0.0729957
ENSG00000172238	ATOH1	1	10	0.073129
ENSG00000189144	ZNF573	1	7	0.073186
ENSG00000140395	WDR61	1	9	0.0732055
ENSG00000099783	HNRNPM	1	4	0.0732962
ENSG00000180155	LYNX1	1	7	0.0733692
ENSG00000183862	CNGA2	1	11	0.0734158
ENSG00000125457	MIF4GD	1	10	0.0735983
ENSG00000126882	FAM78A	1	10	0.0736305
ENSG00000160058	BSDC1	1	11	0.0736778
ENSG00000206560	ANKRD28	2	26	0.0736975
ENSG00000225614	ZNF469	1	9	0.0738131
ENSG00000148602	LRIT1	1	8	0.0738737
ENSG00000165355	FBXO33	1	8	0.0740299
ENSG00000122787	AKR1D1	1	9	0.0740371
ENSG00000148468	FAM171A1	2	23	0.0740906
ENSG00000065320	NTN1	1	10	0.0741799
ENSG00000131375	CAPN7	1	12	0.0742721
ENSG00000175697	GPR156	1	9	0.0743457
ENSG00000182645	CCDC172	1	5	0.0744057
ENSG00000102362	SYTL4	1	10	0.0745652
ENSG00000171385	KCND3	1	10	0.0745741
ENSG00000102547	CAB39L	1	7	0.0747243
ENSG00000163297	ANTXR2	1	9	0.074758
ENSG00000115828	QPCT	1	8	0.0748271
ENSG00000167800	TBX10	1	8	0.0749415
ENSG00000151006	PRSS53	1	8	0.0751094
ENSG00000228727	SAPCD1	1	11	0.0751894
ENSG00000065457	ADAT1	1	8	0.0753236
ENSG00000186575	NF2	1	11	0.0753681
ENSG00000137496	IL18BP	1	8	0.0753795
ENSG00000165995	CACNB2	2	23	0.0754375
ENSG00000172318	B3GALT1	1	6	0.0755144
ENSG00000086619	ERO1B	1	5	0.0756426
ENSG00000153446	C16orf89	1	9	0.0756748
ENSG00000080603	SRCAP	4	83	0.0756991
ENSG00000148200	NR6A1	1	8	0.0757241
ENSG00000162627	SNX7	1	10	0.0757449
ENSG00000077514	POLD3	1	10	0.0757565
ENSG00000124713	GNMT	1	4	0.0759991
ENSG00000146243	IRAK1BP1	1	9	0.0760541
ENSG00000083807	SLC27A5	1	12	0.0761821
ENSG00000236398	TAS2R39	1	8	0.0761873
ENSG00000214063	TSPAN4	1	9	0.0762246
ENSG00000231213	PLSCR5	1	5	0.0762315
ENSG00000187003	ACTL7A	1	5	0.0762971
ENSG00000100979	PLTP	2	24	0.0763277
ENSG00000095637	SORBS1	2	27	0.0765571
ENSG00000100439	ABHD4	1	9	0.0765787
ENSG00000118046	STK11	1	10	0.0765987
ENSG00000185264	TEX33	1	5	0.0766566
ENSG00000073756	PTGS2	1	9	0.0767582
ENSG00000250510	GPR162	2	23	0.0768523
ENSG00000115963	RND3	1	5	0.0769459
ENSG00000168438	CDC40	1	10	0.0769781
ENSG00000010932	FMO1	1	9	0.0770047
ENSG00000166130	IKBIP	1	10	0.0771133
ENSG00000118513	MYB	1	11	0.0772861
ENSG00000165630	PRPF18	1	3	0.0773433
ENSG00000121892	PDS5A	1	10	0.0774147
ENSG00000074276	CDHR2	2	30	0.0774224
ENSG00000140264	SERF2	1	4	0.0776217
ENSG00000204613	TRIM10	2	25	0.0777769
ENSG00000115641	FHL2	1	7	0.0777984
ENSG00000120875	DUSP4	1	8	0.077807
ENSG00000107281	NPDC1	1	5	0.077811
ENSG00000036257	CUL3	1	10	0.0778626
ENSG00000136319	TTC5	1	9	0.0779058
ENSG00000148832	PAOX	1	7	0.077976
ENSG00000157766	ACAN	3	46	0.078186
ENSG00000101473	ACOT8	1	10	0.0782164
ENSG00000056558	TRAF1	1	10	0.0782726
ENSG00000135905	DOCK10	3	42	0.078455
ENSG00000111676	ATN1	1	9	0.0784972
ENSG00000153786	ZDHHC7	1	9	0.0785235
ENSG00000086967	MYBPC2	2	25	0.0786138
ENSG00000028116	VRK2	1	8	0.0786957
ENSG00000149196	HIKESHI	1	10	0.07872
ENSG00000116514	RNF19B	1	9	0.0787725
ENSG00000081692	JMJD4	1	10	0.0791719
ENSG00000161031	PGLYRP2	1	3	0.0791724
ENSG00000181264	TLCD5	1	10	0.0791763
ENSG00000096384	HSP90AB1	1	9	0.0792811
ENSG00000119403	PHF19	1	9	0.0794298
ENSG00000009950	MLXIPL	1	6	0.0794358
ENSG00000271303	SRXN1	1	7	0.0796265
ENSG00000146039	SLC17A4	1	10	0.0797027
ENSG00000178999	AURKB	1	6	0.0797204
ENSG00000116731	PRDM2	2	30	0.0797546
ENSG00000182575	NXPH3	1	8	0.079826
ENSG00000154556	SORBS2	2	30	0.079858
ENSG00000250305	TRMT9B	1	8	0.0799014
ENSG00000141349	G6PC3	1	10	0.0799927
ENSG00000173846	PLK3	1	11	0.0805215
ENSG00000007047	MARK4	1	9	0.0805628
ENSG00000055208	TAB2	1	10	0.0806276
ENSG00000164162	ANAPC10	1	10	0.0808196
ENSG00000206538	VGLL3	1	8	0.0808991
ENSG00000163558	PRKCI	1	4	0.0809733
ENSG00000156261	CCT8	1	9	0.0810569
ENSG00000165409	TSHR	1	12	0.0810987
ENSG00000125970	RALY	1	6	0.081152
ENSG00000156049	GNA14	1	11	0.081316
ENSG00000145912	NHP2	1	9	0.0814304
ENSG00000122375	OPN4	1	10	0.0815736
ENSG00000081177	EXD2	1	9	0.0816692
ENSG00000181240	SLC25A41	1	10	0.0817857
ENSG00000143390	RFX5	1	11	0.0817999
ENSG00000090273	NUDC	1	9	0.0818162
ENSG00000103356	EARS2	1	8	0.0819677
ENSG00000141086	CTRL	1	7	0.0820591
ENSG00000124006	OBSL1	3	51	0.0822779
ENSG00000148737	TCF7L2	1	10	0.0823055
ENSG00000136754	ABI1	1	9	0.0823933
ENSG00000114446	IFT57	1	9	0.0824595
ENSG00000112365	ZBTB24	1	9	0.0824777
ENSG00000156509	FBXO43	1	9	0.0824884
ENSG00000100664	EIF5	1	9	0.0826738
ENSG00000059804	SLC2A3	1	9	0.0828552
ENSG00000126091	ST3GAL3	1	11	0.082871
ENSG00000165688	PMPCA	1	10	0.083096
ENSG00000142751	GPN2	1	12	0.0832898
ENSG00000198799	LRIG2	2	28	0.0833316
ENSG00000130396	AFDN	3	50	0.0834632
ENSG00000185909	KLHDC8B	1	10	0.083563
ENSG00000176302	FOXR1	1	6	0.0837216
ENSG00000084092	NOA1	1	10	0.0838459
ENSG00000166548	TK2	1	11	0.0840325
ENSG00000112159	MDN1	5	108	0.0840802
ENSG00000221829	FANCG	1	12	0.0841514
ENSG00000204130	RUFY2	1	9	0.0841921
ENSG00000164294	GPX8	1	5	0.0846412
ENSG00000044090	CUL7	3	49	0.0846463
ENSG00000150456	EEF1AKMT1	1	10	0.0846468
ENSG00000074582	BCS1L	1	9	0.0846819
ENSG00000188487	INSC	2	30	0.0847185
ENSG00000151005	TKTL2	1	11	0.0848352
ENSG00000168807	SNTB2	1	10	0.084949
ENSG00000150907	FOXO1	1	9	0.0850111
ENSG00000198890	PRMT6	1	11	0.0850988
ENSG00000185046	ANKS1B	1	11	0.0852126
ENSG00000031823	RANBP3	1	11	0.0853812
ENSG00000140092	FBLN5	1	11	0.0853998
ENSG00000136603	SKIL	1	8	0.0854193
ENSG00000161642	ZNF385A	1	10	0.0854836
ENSG00000122507	BBS9	1	12	0.0855415
ENSG00000130037	KCNA5	1	9	0.0856047
ENSG00000149480	MTA2	1	12	0.0857202
ENSG00000185344	ATP6V0A2	2	24	0.0857998
ENSG00000184716	SERINC4	1	9	0.0858738
ENSG00000117298	ECE1	1	10	0.0858843
ENSG00000116852	KIF21B	3	50	0.0861341
ENSG00000150768	DLAT	1	10	0.0861961
ENSG00000138964	PARVG	1	6	0.086231
ENSG00000172320	OR5A1	1	12	0.0862443
ENSG00000160588	MPZL3	1	10	0.086424
ENSG00000130758	MAP3K10	1	11	0.0864338
ENSG00000130751	NPAS1	1	10	0.0864895
ENSG00000164347	GFM2	1	12	0.0864921
ENSG00000129158	SERGEF	1	11	0.086523
ENSG00000167264	DUS2	1	10	0.08668
ENSG00000104055	TGM5	1	12	0.0866901
ENSG00000263002	ZNF234	1	10	0.0867395
ENSG00000137709	POU2F3	1	10	0.0868525
ENSG00000138771	SHROOM3	2	23	0.086938
ENSG00000112964	GHR	1	12	0.0870688
ENSG00000091844	RGS17	1	10	0.0872662
ENSG00000243725	TTC4	1	9	0.0874969
ENSG00000001461	NIPAL3	1	9	0.0875218
ENSG00000163600	ICOS	1	3	0.0876385
ENSG00000173715	C11orf80	1	10	0.0876487
ENSG00000148331	ASB6	1	10	0.0879198
ENSG00000099960	SLC7A4	1	9	0.0879217
ENSG00000127081	ZNF484	1	11	0.0879589
ENSG00000178295	GEN1	1	7	0.0880693
ENSG00000100288	CHKB	1	9	0.0882914
ENSG00000180917	CMTR2	1	10	0.0883345
ENSG00000137878	GCOM1	1	8	0.0883462
ENSG00000067334	DNTTIP2	1	9	0.0883667
ENSG00000144566	RAB5A	1	8	0.0884552
ENSG00000141867	BRD4	1	11	0.0884742
ENSG00000170961	HAS2	1	9	0.0886183
ENSG00000163145	C1QTNF7	1	9	0.0888065
ENSG00000149925	ALDOA	1	10	0.0888927
ENSG00000049323	LTBP1	2	28	0.0889791
ENSG00000135436	FAM186B	1	8	0.0890551
ENSG00000122574	WIPF3	1	12	0.0890645
ENSG00000169118	CSNK1G1	1	10	0.0890961
ENSG00000089225	TBX5	1	10	0.0891182
ENSG00000128923	MINDY2	1	8	0.0891607
ENSG00000197312	DDI2	1	9	0.0892128
ENSG00000103429	BFAR	1	7	0.0892227
ENSG00000187189	TSPYL4	1	9	0.0892788
ENSG00000135423	GLS2	1	11	0.0893062
ENSG00000073614	KDM5A	2	27	0.0893461
ENSG00000243335	KCTD7	1	8	0.0894045
ENSG00000196118	CCDC189	1	9	0.0894688
ENSG00000159374	M1AP	1	10	0.089566
ENSG00000178467	P4HTM	1	10	0.0896261
ENSG00000006025	OSBPL7	1	11	0.0896406
ENSG00000134070	IRAK2	1	11	0.0897919
ENSG00000182504	CEP97	1	9	0.0898241
ENSG00000178175	ZNF366	1	10	0.089849
ENSG00000133110	POSTN	1	9	0.090004
ENSG00000169967	MAP3K2	1	11	0.0900407
ENSG00000164458	TBXT	1	9	0.09005
ENSG00000175567	UCP2	1	7	0.0900889
ENSG00000198876	DCAF12	1	4	0.0901057
ENSG00000100593	ISM2	1	9	0.090164
ENSG00000165996	HACD1	1	8	0.0901831
ENSG00000149295	DRD2	1	9	0.0901861
ENSG00000118965	WDR35	2	28	0.0903543
ENSG00000205667	ARSH	1	10	0.0903553
ENSG00000138380	CARF	1	12	0.0903678
ENSG00000162434	JAK1	1	9	0.0904088
ENSG00000187486	KCNJ11	1	10	0.0906194
ENSG00000125484	GTF3C4	1	8	0.0908783
ENSG00000172915	NBEA	2	29	0.0910006
ENSG00000166428	PLD4	1	8	0.0912178
ENSG00000116406	EDEM3	1	11	0.0912943
ENSG00000167941	SOST	1	5	0.0915344
ENSG00000144649	GASK1A	1	8	0.0916858
ENSG00000067208	EVI5	1	10	0.0917197
ENSG00000087495	PHACTR3	1	7	0.0917309
ENSG00000213689	TREX1	1	13	0.0917434
ENSG00000007392	LUC7L	1	10	0.0918149
ENSG00000116898	MRPS15	1	8	0.0918402
ENSG00000126522	ASL	1	9	0.0919983
ENSG00000140299	BNIP2	1	12	0.092103
ENSG00000214694	ARHGEF33	1	9	0.0921168
ENSG00000153827	TRIP12	2	30	0.0922281
ENSG00000170175	CHRNB1	1	11	0.0922325
ENSG00000132561	MATN2	2	24	0.0922869
ENSG00000164292	RHOBTB3	1	13	0.0923451
ENSG00000149452	SLC22A8	1	8	0.092407
ENSG00000138031	ADCY3	2	28	0.0924722
ENSG00000161277	THAP8	1	10	0.092559
ENSG00000114450	GNB4	1	10	0.0925885
ENSG00000111432	FZD10	1	10	0.0925902
ENSG00000173040	EVC2	2	26	0.0925954
ENSG00000120690	ELF1	1	12	0.0926101
ENSG00000198231	DDX42	1	9	0.0926301
ENSG00000164615	CAMLG	1	10	0.0928289
ENSG00000075213	SEMA3A	1	10	0.0929132
ENSG00000205754	SLCO1B7	1	11	0.0930326
ENSG00000157110	RBPMS	1	7	0.0930637
ENSG00000222028	PSMB11	1	11	0.0931917
ENSG00000152457	DCLRE1C	1	9	0.0932527
ENSG00000110330	BIRC2	1	10	0.0933436
ENSG00000168036	CTNNB1	1	7	0.0933986
ENSG00000153162	BMP6	1	8	0.0934382
ENSG00000162878	PKDCC	1	12	0.0934721
ENSG00000184811	TRARG1	1	10	0.0935106
ENSG00000040341	STAU2	1	7	0.0935139
ENSG00000094880	CDC23	1	10	0.0936578
ENSG00000185049	NELFA	1	12	0.0936757
ENSG00000095906	NUBP2	1	11	0.0938862
ENSG00000158850	B4GALT3	1	10	0.0939187
ENSG00000137090	DMRT1	1	10	0.0940598
ENSG00000006695	COX10	1	6	0.0941541
ENSG00000164430	CGAS	1	11	0.094173
ENSG00000116133	DHCR24	1	10	0.0941888
ENSG00000134291	TMEM106C	1	7	0.0942575
ENSG00000133706	LARS1	2	34	0.0942991
ENSG00000175063	UBE2C	1	5	0.0943711
ENSG00000146453	PNLDC1	1	12	0.094464
ENSG00000160326	SLC2A6	1	13	0.0944899
ENSG00000101336	HCK	1	11	0.0945426
ENSG00000076555	ACACB	4	83	0.0945443
ENSG00000101349	PAK5	1	11	0.0946002
ENSG00000182447	OTOL1	1	13	0.0947151
ENSG00000213853	EMP2	1	8	0.0947357
ENSG00000071909	MYO3B	3	51	0.0949234
ENSG00000126012	KDM5C	1	9	0.0951871
ENSG00000185760	KCNQ5	1	8	0.0951978
ENSG00000174938	SEZ6L2	2	28	0.0953022
ENSG00000205268	PDE7A	1	12	0.0953931
ENSG00000171365	CLCN5	1	12	0.0957441
ENSG00000181616	OR52H1	1	13	0.0958344
ENSG00000107954	NEURL1	1	12	0.0958725
ENSG00000112855	HARS2	1	11	0.0959652
ENSG00000083168	KAT6A	2	34	0.0960571
ENSG00000162946	DISC1	1	12	0.0962057
ENSG00000077713	SLC25A43	1	10	0.096215
ENSG00000136940	PDCL	1	7	0.0962215
ENSG00000127980	PEX1	2	32	0.0966361
ENSG00000162068	NTN3	1	11	0.0966754
ENSG00000213780	GTF2H4	1	12	0.0967367
ENSG00000213949	ITGA1	2	30	0.0969317
ENSG00000175520	UBQLN3	1	9	0.0969796
ENSG00000108106	UBE2S	1	6	0.0971481
ENSG00000008118	CAMK1G	1	11	0.0971806
ENSG00000169306	IL1RAPL1	1	10	0.0971852
ENSG00000179071	CCDC89	1	9	0.0971932
ENSG00000106628	POLD2	1	7	0.0972059
ENSG00000147689	FAM83A	1	7	0.0973721
ENSG00000179008	C14orf39	1	5	0.0974444
ENSG00000137801	THBS1	2	23	0.0974523
ENSG00000133069	TMCC2	1	12	0.0974745
ENSG00000166025	AMOTL1	1	13	0.0974902
ENSG00000152611	CAPSL	1	8	0.0976217
ENSG00000168497	CAVIN2	1	8	0.0978593
ENSG00000075340	ADD2	1	11	0.0980463
ENSG00000084710	EFR3B	1	12	0.0982168
ENSG00000163751	CPA3	1	12	0.0983067
ENSG00000088756	ARHGAP28	1	9	0.0983698
ENSG00000188175	HEPACAM2	1	13	0.0983846
ENSG00000131471	AOC3	1	11	0.0984477
ENSG00000151500	THYN1	1	9	0.0984507
ENSG00000079785	DDX1	1	12	0.098503
ENSG00000119888	EPCAM	1	12	0.0986472
ENSG00000142765	SYTL1	1	12	0.0987286
ENSG00000103591	AAGAB	1	11	0.0988705
ENSG00000130803	ZNF317	1	12	0.0989077
ENSG00000128294	TPST2	1	10	0.0989403
ENSG00000108433	GOSR2	1	8	0.098977
ENSG00000197641	SERPINB13	1	10	0.0990163
ENSG00000175003	SLC22A1	1	12	0.0990179
ENSG00000110013	SIAE	1	10	0.0991092
ENSG00000212916	MAP10	1	13	0.0993532
ENSG00000196329	GIMAP5	1	6	0.0995516
ENSG00000169764	UGP2	1	11	0.0996483
ENSG00000124198	ARFGEF2	3	48	0.0997748
ENSG00000197746	PSAP	1	12	0.0998015
ENSG00000169696	ASPSCR1	1	11	0.0998284
ENSG00000169221	TBC1D10B	1	7	0.100187
ENSG00000248592	STIMATE-MUSTN1	1	12	0.100312
ENSG00000134955	SLC37A2	1	12	0.100343
ENSG00000140950	MEAK7	1	12	0.100563
ENSG00000138678	GPAT3	1	11	0.100715
ENSG00000101096	NFATC2	1	12	0.100743
ENSG00000099849	RASSF7	1	11	0.100895
ENSG00000131242	RAB11FIP4	1	13	0.101108
ENSG00000022556	NLRP2	1	11	0.101272
ENSG00000173114	LRRN3	1	9	0.101325
ENSG00000154265	ABCA5	2	32	0.101828
ENSG00000135838	NPL	1	7	0.101925
ENSG00000130175	PRKCSH	1	12	0.101983
ENSG00000105393	BABAM1	1	12	0.1023
ENSG00000158488	CD1E	1	11	0.102516
ENSG00000066583	ISOC1	1	9	0.102576
ENSG00000108039	XPNPEP1	1	12	0.102625
ENSG00000007384	RHBDF1	1	12	0.102644
ENSG00000139116	KIF21A	2	33	0.102689
ENSG00000163157	TMOD4	1	10	0.102706
ENSG00000059691	GATB	1	9	0.102856
ENSG00000085491	SLC25A24	1	12	0.102886
ENSG00000144214	LYG1	1	6	0.102967
ENSG00000162032	SPSB3	1	7	0.102969
ENSG00000167291	TBC1D16	1	13	0.103037
ENSG00000132471	WBP2	1	12	0.103073
ENSG00000115816	CEBPZ	2	27	0.103124
ENSG00000186714	CCDC73	1	9	0.103238
ENSG00000112276	BVES	1	11	0.10348
ENSG00000256525	POLG2	1	11	0.103503
ENSG00000053371	AKR7A2	1	11	0.103572
ENSG00000130338	TULP4	2	34	0.103709
ENSG00000154646	TMPRSS15	2	25	0.103732
ENSG00000165887	ANKRD2	1	13	0.103788
ENSG00000126216	TUBGCP3	1	10	0.103792
ENSG00000140718	FTO	1	7	0.103828
ENSG00000204469	PRRC2A	3	59	0.103859
ENSG00000154678	PDE1C	1	12	0.103909
ENSG00000180376	CCDC66	2	27	0.104173
ENSG00000135775	COG2	1	10	0.104226
ENSG00000011376	LARS2	1	13	0.104268
ENSG00000153012	LGI2	1	12	0.104372
ENSG00000133243	BTBD2	1	11	0.104402
ENSG00000170509	HSD17B13	1	13	0.104414
ENSG00000123983	ACSL3	1	12	0.104459
ENSG00000164176	EDIL3	1	7	0.104614
ENSG00000140107	SLC25A47	1	13	0.104626
ENSG00000198270	TMEM116	1	12	0.104663
ENSG00000149506	ZP1	1	12	0.104783
ENSG00000104973	MED25	1	12	0.10486
ENSG00000166342	NETO1	1	11	0.104864
ENSG00000111834	RSPH4A	1	8	0.104947
ENSG00000133103	COG6	2	24	0.105046
ENSG00000079257	LXN	1	8	0.105049
ENSG00000152409	JMY	1	12	0.105095
ENSG00000116809	ZBTB17	1	10	0.105133
ENSG00000135740	SLC9A5	1	12	0.105179
ENSG00000138279	ANXA7	1	10	0.105213
ENSG00000005020	SKAP2	1	12	0.105264
ENSG00000214753	HNRNPUL2	1	11	0.105286
ENSG00000188157	AGRN	2	25	0.10531
ENSG00000110218	PANX1	1	12	0.105503
ENSG00000162592	CCDC27	1	10	0.105561
ENSG00000111424	VDR	1	12	0.105569
ENSG00000111077	TNS2	2	34	0.105751
ENSG00000185972	CCIN	1	12	0.106035
ENSG00000075292	ZNF638	2	32	0.106188
ENSG00000007944	MYLIP	1	14	0.106416
ENSG00000119431	HDHD3	1	9	0.106437
ENSG00000213892	CEACAM16	1	11	0.106441
ENSG00000077152	UBE2T	1	9	0.106529
ENSG00000133477	FAM83F	1	9	0.106579
ENSG00000108839	ALOX12	1	10	0.106625
ENSG00000253846	PCDHGA10	1	14	0.106644
ENSG00000164916	FOXK1	1	11	0.10683
ENSG00000228672	PROB1	1	11	0.106866
ENSG00000173612	GPRC6A	1	10	0.107007
ENSG00000120370	GORAB	1	11	0.107025
ENSG00000132256	TRIM5	1	13	0.107085
ENSG00000163608	NEPRO	1	11	0.107104
ENSG00000120729	MYOT	1	10	0.107114
ENSG00000006740	ARHGAP44	1	10	0.107139
ENSG00000176915	ANKLE2	1	10	0.107166
ENSG00000161544	CYGB	1	10	0.107215
ENSG00000089012	SIRPG	1	5	0.107424
ENSG00000133056	PIK3C2B	2	32	0.107556
ENSG00000171310	CHST11	1	14	0.107574
ENSG00000105668	UPK1A	1	13	0.10771
ENSG00000083223	TUT7	1	9	0.107788
ENSG00000184432	COPB2	1	11	0.107833
ENSG00000175166	PSMD2	1	14	0.107863
ENSG00000259030	FPGT-TNNI3K	3	52	0.107968
ENSG00000137561	TTPA	1	12	0.108044
ENSG00000178662	CSRNP3	1	11	0.108053
ENSG00000113597	TRAPPC13	1	7	0.108056
ENSG00000152969	JAKMIP1	1	9	0.108085
ENSG00000169026	SLC49A3	1	9	0.108188
ENSG00000126583	PRKCG	1	10	0.108325
ENSG00000130299	GTPBP3	1	12	0.108349
ENSG00000165496	RPL10L	1	8	0.108923
ENSG00000115137	DNAJC27	1	11	0.108942
ENSG00000164306	PRIMPOL	1	12	0.108998
ENSG00000050405	LIMA1	1	11	0.109046
ENSG00000197724	PHF2	1	13	0.109095
ENSG00000221963	APOL6	0	1	0.109113
ENSG00000149150	SLC43A1	1	13	0.109134
ENSG00000166147	FBN1	3	56	0.109215
ENSG00000188677	PARVB	1	6	0.109266
ENSG00000162595	DIRAS3	0	1	0.109425
ENSG00000154803	FLCN	2	29	0.109665
ENSG00000128159	TUBGCP6	3	53	0.10984
ENSG00000176927	EFCAB5	1	12	0.109951
ENSG00000104313	EYA1	1	14	0.110033
ENSG00000177106	EPS8L2	1	13	0.110086
ENSG00000143994	ABHD1	1	14	0.110217
ENSG00000163687	DNASE1L3	1	12	0.110323
ENSG00000100060	MFNG	1	9	0.110438
ENSG00000114204	SERPINI2	1	11	0.11046
ENSG00000091428	RAPGEF4	2	33	0.110463
ENSG00000123143	PKN1	1	14	0.110525
ENSG00000137098	SPAG8	1	6	0.110547
ENSG00000178537	SLC25A20	1	11	0.110663
ENSG00000170854	RIOX2	1	8	0.110753
ENSG00000150347	ARID5B	1	12	0.11152
ENSG00000170561	IRX2	1	12	0.111545
ENSG00000179674	ARL14	1	13	0.111557
ENSG00000155463	OXA1L	1	9	0.111606
ENSG00000149926	TLCD3B	0	1	0.111635
ENSG00000143297	FCRL5	1	10	0.111784
ENSG00000179454	KLHL28	1	11	0.111828
ENSG00000125910	S1PR4	1	12	0.111886
ENSG00000157014	TATDN2	1	13	0.112176
ENSG00000183044	ABAT	1	8	0.112301
ENSG00000168564	CDKN2AIP	1	11	0.112308
ENSG00000120457	KCNJ5	1	12	0.112404
ENSG00000004700	RECQL	1	12	0.112444
ENSG00000163075	CFAP221	1	12	0.112554
ENSG00000165568	AKR1E2	1	12	0.112574
ENSG00000172046	USP19	2	35	0.112709
ENSG00000168488	ATXN2L	1	12	0.112738
ENSG00000117676	RPS6KA1	1	12	0.113002
ENSG00000104980	TIMM44	1	12	0.113066
ENSG00000164291	ARSK	1	11	0.113076
ENSG00000144815	NXPE3	1	12	0.113123
ENSG00000162598	C1orf87	1	10	0.113136
ENSG00000185024	BRF1	1	11	0.113175
ENSG00000111961	SASH1	1	12	0.113223
ENSG00000176095	IP6K1	1	7	0.113272
ENSG00000118804	STBD1	1	7	0.11329
ENSG00000144891	AGTR1	0	1	0.113409
ENSG00000066777	ARFGEF1	1	14	0.113417
ENSG00000184058	TBX1	0	1	0.113558
ENSG00000197587	DMBX1	1	11	0.114186
ENSG00000174469	CNTNAP2	2	33	0.114244
ENSG00000115112	TFCP2L1	1	11	0.114281
ENSG00000130165	ELOF1	0	1	0.11451
ENSG00000204628	RACK1	0	1	0.11451
ENSG00000180801	ARSJ	1	6	0.114548
ENSG00000053524	MCF2L2	1	13	0.114725
ENSG00000143614	GATAD2B	1	10	0.114784
ENSG00000269858	EGLN2	1	12	0.114935
ENSG00000136108	CKAP2	1	11	0.114942
ENSG00000143418	CERS2	1	8	0.114957
ENSG00000239732	TLR9	1	13	0.114965
ENSG00000166167	BTRC	1	14	0.115121
ENSG00000197891	SLC22A12	1	14	0.115269
ENSG00000164512	ANKRD55	1	12	0.115347
ENSG00000115145	STAM2	1	12	0.115352
ENSG00000197959	DNM3	1	12	0.115462
ENSG00000100350	FOXRED2	1	15	0.115645
ENSG00000089163	SIRT4	1	11	0.115731
ENSG00000248098	BCKDHA	1	14	0.115762
ENSG00000138615	CILP	2	31	0.115764
ENSG00000079102	RUNX1T1	1	12	0.115911
ENSG00000142910	TINAGL1	1	13	0.116087
ENSG00000066629	EML1	1	16	0.116223
ENSG00000198954	KIFBP	1	13	0.116233
ENSG00000105997	HOXA3	1	12	0.116247
ENSG00000100368	CSF2RB	1	14	0.116337
ENSG00000185361	TNFAIP8L1	0	1	0.11636
ENSG00000162976	SLC66A3	0	1	0.116408
ENSG00000122417	ODF2L	1	14	0.116496
ENSG00000152192	POU4F1	0	1	0.116549
ENSG00000104881	PPP1R13L	1	12	0.116669
ENSG00000050767	COL23A1	1	10	0.116713
ENSG00000187796	CARD9	1	9	0.11677
ENSG00000183960	KCNH8	1	12	0.116793
ENSG00000138646	HERC5	1	10	0.116809
ENSG00000136944	LMX1B	1	13	0.116894
ENSG00000112893	MAN2A1	1	14	0.117131
ENSG00000172006	ZNF554	1	11	0.117144
ENSG00000151572	ANO4	1	13	0.117158
ENSG00000198003	ODAD3	1	13	0.117189
ENSG00000049283	EPN3	1	14	0.117208
ENSG00000042088	TDP1	1	11	0.117369
ENSG00000123358	NR4A1	1	15	0.117503
ENSG00000138271	GPR87	1	11	0.117536
ENSG00000123977	DAW1	1	12	0.117536
ENSG00000172071	EIF2AK3	1	13	0.117704
ENSG00000147606	SLC26A7	1	10	0.11784
ENSG00000123124	WWP1	1	14	0.117952
ENSG00000178997	EXD1	1	11	0.118089
ENSG00000248919	ATP5MF-PTCD1	1	12	0.118231
ENSG00000134013	LOXL2	2	31	0.118269
ENSG00000132932	ATP8A2	1	12	0.118342
ENSG00000029639	TFB1M	1	9	0.11855
ENSG00000060069	CTDP1	1	13	0.118588
ENSG00000109854	HTATIP2	1	8	0.118588
ENSG00000112337	SLC17A2	1	9	0.118722
ENSG00000126249	PDCD2L	1	8	0.118854
ENSG00000125744	RTN2	1	9	0.118886
ENSG00000163719	MTMR14	1	11	0.118909
ENSG00000174607	UGT8	1	14	0.118923
ENSG00000105701	FKBP8	1	4	0.119169
ENSG00000114779	ABHD14B	1	12	0.119359
ENSG00000173262	SLC2A14	1	9	0.119392
ENSG00000178222	RNF212	1	10	0.119756
ENSG00000065243	PKN2	1	13	0.119784
ENSG00000066468	FGFR2	1	12	0.119891
ENSG00000114268	PFKFB4	1	11	0.120003
ENSG00000197442	MAP3K5	1	14	0.120009
ENSG00000213996	TM6SF2	1	14	0.120187
ENSG00000141506	PIK3R5	1	11	0.12028
ENSG00000142731	PLK4	1	13	0.120392
ENSG00000131370	SH3BP5	1	10	0.120458
ENSG00000142552	RCN3	1	12	0.120526
ENSG00000184933	OR6A2	1	11	0.120663
ENSG00000151348	EXT2	1	14	0.120718
ENSG00000163913	IFT122	2	35	0.12073
ENSG00000167508	MVD	1	14	0.120801
ENSG00000163362	INAVA	1	13	0.120805
ENSG00000047056	WDR37	1	12	0.12096
ENSG00000215305	VPS16	2	31	0.121104
ENSG00000140948	ZCCHC14	1	13	0.121124
ENSG00000133740	E2F5	0	1	0.121143
ENSG00000125821	DTD1	1	11	0.121166
ENSG00000106546	AHR	1	11	0.121223
ENSG00000162706	CADM3	1	9	0.121329
ENSG00000100441	KHNYN	1	9	0.12134
ENSG00000112078	KCTD20	1	15	0.12158
ENSG00000153956	CACNA2D1	1	12	0.121703
ENSG00000140534	TICRR	1	14	0.121758
ENSG00000008277	ADAM22	1	12	0.121956
ENSG00000079335	CDC14A	1	12	0.12203
ENSG00000163348	PYGO2	1	7	0.122043
ENSG00000110619	CARS1	1	13	0.122072
ENSG00000175920	DOK7	1	13	0.122074
ENSG00000130921	C12orf65	0	1	0.122715
ENSG00000165821	SALL2	1	16	0.12275
ENSG00000115904	SOS1	1	13	0.122854
ENSG00000168724	DNAJC21	1	15	0.122916
ENSG00000141562	NARF	1	13	0.123027
ENSG00000172725	CORO1B	1	12	0.123032
ENSG00000166189	HPS6	1	12	0.123102
ENSG00000156113	KCNMA1	1	13	0.123138
ENSG00000159495	TGM7	1	13	0.123254
ENSG00000137486	ARRB1	1	14	0.123314
ENSG00000127334	DYRK2	1	13	0.123683
ENSG00000133835	HSD17B4	1	11	0.123753
ENSG00000161594	KLHL10	1	7	0.123794
ENSG00000127022	CANX	1	9	0.123886
ENSG00000170558	CDH2	1	14	0.123904
ENSG00000078295	ADCY2	1	13	0.123919
ENSG00000005381	MPO	2	31	0.124101
ENSG00000166959	MS4A8	0	1	0.124104
ENSG00000158402	CDC25C	1	12	0.124127
ENSG00000101057	MYBL2	1	11	0.124153
ENSG00000163406	SLC15A2	1	12	0.124246
ENSG00000165816	VWA2	1	13	0.12443
ENSG00000185345	PRKN	1	12	0.124625
ENSG00000102287	GABRE	1	12	0.124738
ENSG00000184451	CCR10	0	1	0.124873
ENSG00000177191	B3GNT8	1	9	0.124902
ENSG00000253719	ATXN7L3B	0	1	0.125126
ENSG00000164707	SLC13A4	1	14	0.125136
ENSG00000203685	STUM	0	1	0.125298
ENSG00000132004	FBXW9	1	13	0.125322
ENSG00000099995	SF3A1	1	8	0.125425
ENSG00000115268	RPS15	0	1	0.12547
ENSG00000213906	LTB4R2	0	1	0.125545
ENSG00000173908	KRT28	1	15	0.125716
ENSG00000125257	ABCC4	2	32	0.125745
ENSG00000188763	FZD9	1	9	0.125848
ENSG00000196159	FAT4	0	108	0.126098
ENSG00000122547	EEPD1	1	8	0.126187
ENSG00000113240	CLK4	1	13	0.126209
ENSG00000162980	ARL5A	0	1	0.12624
ENSG00000069966	GNB5	1	12	0.126415
ENSG00000047849	MAP4	1	11	0.126529
ENSG00000139613	SMARCC2	1	15	0.126745
ENSG00000141497	ZMYND15	1	13	0.126792
ENSG00000182685	BRICD5	1	13	0.126799
ENSG00000105290	APLP1	1	13	0.126819
ENSG00000132912	DCTN4	1	12	0.126821
ENSG00000009790	TRAF3IP3	1	9	0.126823
ENSG00000106178	CCL24	0	1	0.126913
ENSG00000159082	SYNJ1	1	13	0.126999
ENSG00000159445	THEM4	0	1	0.127078
ENSG00000244537	KRTAP4-2	0	1	0.127078
ENSG00000258818	RNASE4	0	1	0.12714
ENSG00000182866	LCK	1	6	0.127298
ENSG00000198682	PAPSS2	2	26	0.127318
ENSG00000177707	NECTIN3	1	11	0.127326
ENSG00000135945	REV1	1	13	0.127355
ENSG00000100473	COCH	1	12	0.127549
ENSG00000107187	LHX3	1	8	0.127583
ENSG00000117616	RSRP1	1	9	0.127629
ENSG00000175137	SH3BP5L	1	11	0.127826
ENSG00000213445	SIPA1	1	11	0.127836
ENSG00000044446	PHKA2	1	12	0.127938
ENSG00000196754	S100A2	0	1	0.127953
ENSG00000149633	KIAA1755	2	34	0.12804
ENSG00000115295	CLIP4	1	14	0.128044
ENSG00000109685	NSD2	1	14	0.128087
ENSG00000103043	VAC14	1	13	0.128224
ENSG00000113790	EHHADH	1	12	0.12834
ENSG00000196208	GREB1	2	36	0.128433
ENSG00000168038	ULK4	2	35	0.128677
ENSG00000105072	C19orf44	1	11	0.128797
ENSG00000029725	RABEP1	1	13	0.128959
ENSG00000131142	CCL25	0	1	0.128965
ENSG00000205423	CNEP1R1	0	1	0.128965
ENSG00000167910	CYP7A1	1	13	0.129184
ENSG00000150457	LATS2	1	10	0.129232
ENSG00000183067	IGSF5	1	11	0.129425
ENSG00000197563	PIGN	1	15	0.129445
ENSG00000161203	AP2M1	0	1	0.129482
ENSG00000153060	TEKT5	1	9	0.12949
ENSG00000100445	SDR39U1	1	10	0.129706
ENSG00000007314	SCN4A	2	37	0.129768
ENSG00000182508	LHFPL1	0	1	0.129885
ENSG00000101144	BMP7	1	11	0.129917
ENSG00000043093	DCUN1D1	0	1	0.130388
ENSG00000101363	MANBAL	0	1	0.130515
ENSG00000146733	PSPH	0	1	0.130515
ENSG00000198885	ITPRIPL1	1	10	0.130558
ENSG00000129646	QRICH2	1	13	0.130672
ENSG00000198873	GRK5	1	12	0.130678
ENSG00000261934	PCDHGA9	1	15	0.130815
ENSG00000110025	SNX15	1	11	0.130815
ENSG00000183520	UTP11	1	15	0.130862
ENSG00000135900	MRPL44	1	9	0.130899
ENSG00000173418	NAA20	0	1	0.13091
ENSG00000105778	AVL9	1	12	0.131109
ENSG00000169946	ZFPM2	2	33	0.131126
ENSG00000185739	SRL	1	12	0.131146
ENSG00000158715	SLC45A3	1	15	0.13115
ENSG00000105186	ANKRD27	2	34	0.131165
ENSG00000119711	ALDH6A1	1	13	0.131229
ENSG00000174837	ADGRE1	1	10	0.131239
ENSG00000141367	CLTC	1	13	0.13128
ENSG00000143434	SEMA6C	1	16	0.131387
ENSG00000105697	HAMP	0	1	0.131404
ENSG00000133105	RXFP2	1	14	0.13157
ENSG00000164111	ANXA5	1	12	0.131749
ENSG00000132122	SPATA6	1	15	0.131801
ENSG00000101224	CDC25B	1	14	0.13182
ENSG00000111181	SLC6A12	1	12	0.131822
ENSG00000065154	OAT	1	15	0.131841
ENSG00000010310	GIPR	1	12	0.131995
ENSG00000144837	PLA1A	1	13	0.132037
ENSG00000036448	MYOM2	3	60	0.132135
ENSG00000115652	UXS1	1	15	0.132157
ENSG00000144655	CSRNP1	1	11	0.13217
ENSG00000214367	HAUS3	1	13	0.132355
ENSG00000164647	STEAP1	0	1	0.132378
ENSG00000168916	ZNF608	2	36	0.132616
ENSG00000113742	CPEB4	1	11	0.13266
ENSG00000111752	PHC1	1	14	0.13269
ENSG00000069424	KCNAB2	0	1	0.132851
ENSG00000164853	UNCX	0	1	0.132876
ENSG00000177885	GRB2	0	1	0.132876
ENSG00000172769	OR5B3	0	1	0.13293
ENSG00000178826	TMEM139	0	1	0.132959
ENSG00000072210	ALDH3A2	1	13	0.133112
ENSG00000012124	CD22	1	9	0.133273
ENSG00000175054	ATR	2	38	0.133289
ENSG00000116478	HDAC1	1	12	0.133737
ENSG00000253148	RGS21	0	1	0.133798
ENSG00000085117	CD82	1	13	0.133935
ENSG00000157870	PRXL2B	0	1	0.134063
ENSG00000197769	MAP1LC3C	0	1	0.134063
ENSG00000137124	ALDH1B1	1	14	0.134088
ENSG00000088298	EDEM2	1	14	0.134138
ENSG00000162526	TSSK3	1	12	0.134196
ENSG00000239887	C1orf226	0	1	0.13463
ENSG00000167850	CD300C	0	1	0.134659
ENSG00000142494	SLC47A1	1	12	0.134709
ENSG00000137760	ALKBH8	1	15	0.134988
ENSG00000186812	ZNF397	1	12	0.135068
ENSG00000241878	PISD	1	12	0.135096
ENSG00000075826	SEC31B	2	33	0.135441
ENSG00000150093	ITGB1	1	9	0.135497
ENSG00000146918	NCAPG2	1	13	0.135503
ENSG00000214842	RAD51AP2	1	8	0.135522
ENSG00000006071	ABCC8	2	35	0.135574
ENSG00000154767	XPC	1	13	0.135627
ENSG00000112539	C6orf118	1	6	0.135785
ENSG00000132514	CLEC10A	0	1	0.135814
ENSG00000153904	DDAH1	0	1	0.135861
ENSG00000147536	GINS4	1	6	0.135917
ENSG00000105963	ADAP1	1	13	0.136325
ENSG00000145555	MYO10	3	53	0.136388
ENSG00000117448	AKR1A1	1	15	0.136473
ENSG00000131381	RBSN	1	14	0.136578
ENSG00000165521	EML5	2	34	0.136587
ENSG00000174574	AKIRIN1	0	1	0.136685
ENSG00000119953	SMNDC1	0	1	0.136712
ENSG00000137055	PLAA	1	13	0.13678
ENSG00000076864	RAP1GAP	1	11	0.136829
ENSG00000143761	ARF1	0	1	0.136886
ENSG00000137310	TCF19	1	11	0.136906
ENSG00000158008	EXTL1	1	14	0.137013
ENSG00000103544	VPS35L	2	34	0.137043
ENSG00000100802	C14orf93	1	13	0.137087
ENSG00000206530	CFAP44	1	15	0.13715
ENSG00000124535	WRNIP1	1	13	0.137189
ENSG00000169302	STK32A	1	12	0.137273
ENSG00000161249	DMKN	1	8	0.137363
ENSG00000211584	SLC48A1	0	1	0.137393
ENSG00000134058	CDK7	0	1	0.137421
ENSG00000143379	SETDB1	1	15	0.137508
ENSG00000204842	ATXN2	1	13	0.137539
ENSG00000171517	LPAR3	1	14	0.137592
ENSG00000151693	ASAP2	1	14	0.137636
ENSG00000214415	GNAT3	1	12	0.137692
ENSG00000127507	ADGRE2	1	16	0.137787
ENSG00000137941	TTLL7	1	15	0.137889
ENSG00000100362	PVALB	0	1	0.137948
ENSG00000168243	GNG4	0	1	0.137973
[truncated: 14,121 more rows]

## Sheet: PTV model
Ensembl Gene ID	Gene Symbol	Cases (n=66)	Controls (n=2923)	p values
ENSG00000057019	DCBLD2	2	0	5.59e-05
ENSG00000156687	UNC5D	2	0	0.000216983
ENSG00000073614	KDM5A	1	0	0.000837374
ENSG00000131944	FAAP24	1	0	0.00114089
ENSG00000139725	RHOF	1	0	0.00129695
ENSG00000162723	SLAMF9	1	0	0.00129695
ENSG00000164144	ARFIP1	1	0	0.00133702
ENSG00000258366	RTEL1	1	0	0.00133919
ENSG00000100479	POLE2	1	0	0.0015845
ENSG00000142515	KLK3	1	0	0.0015845
ENSG00000168385	SEPTIN2	1	0	0.0015845
ENSG00000254521	SIGLEC12	1	0	0.00164561
ENSG00000105193	RPS16	1	0	0.00177524
ENSG00000135624	CCT7	1	0	0.00177524
ENSG00000059804	SLC2A3	1	0	0.001804
ENSG00000107187	LHX3	1	0	0.001804
ENSG00000160908	ZNF394	1	0	0.00186851
ENSG00000185420	SMYD3	1	0	0.00186851
ENSG00000197142	ACSL5	1	0	0.00186851
ENSG00000242173	ARHGDIG	1	0	0.00186851
ENSG00000148832	PAOX	1	0	0.00192574
ENSG00000166428	PLD4	1	0	0.00192574
ENSG00000188938	FAM120AOS	1	0	0.00192574
ENSG00000251503	CENPS-CORT	1	0	0.00192574
ENSG00000091490	SEL1L3	1	0	0.00194196
ENSG00000159224	GIP	1	0	0.00194196
ENSG00000006007	GDE1	1	0	0.00196919
ENSG00000115486	GGCX	1	0	0.00196919
ENSG00000115942	ORC2	1	0	0.00199877
ENSG00000009790	TRAF3IP3	1	1	0.00203087
ENSG00000181938	GINS3	1	0	0.00221827
ENSG00000135617	PRADC1	1	0	0.00231363
ENSG00000112116	IL17F	1	1	0.00236094
ENSG00000179532	DNHD1	3	15	0.00243723
ENSG00000089639	GMIP	1	0	0.00254849
ENSG00000130762	ARHGEF16	1	0	0.00254849
ENSG00000164808	SPIDR	1	0	0.00257078
ENSG00000116885	OSCP1	1	0	0.00261202
ENSG00000163635	ATXN7	1	0	0.00261202
ENSG00000165476	REEP3	1	0	0.00261549
ENSG00000170260	ZNF212	1	0	0.00261549
ENSG00000148019	CEP78	1	0	0.00262823
ENSG00000159352	PSMD4	1	0	0.00266726
ENSG00000164822	DEFA6	1	0	0.00267694
ENSG00000256713	PGA5	1	0	0.00267694
ENSG00000136492	BRIP1	1	0	0.00274961
ENSG00000154646	TMPRSS15	1	0	0.00277524
ENSG00000005483	KMT2E	1	0	0.00278021
ENSG00000171988	JMJD1C	1	0	0.00278021
ENSG00000181444	ZNF467	1	0	0.00278021
ENSG00000152147	GEMIN6	1	1	0.00281537
ENSG00000100744	GSKIP	1	0	0.00295583
ENSG00000085491	SLC25A24	1	0	0.00304505
ENSG00000115828	QPCT	1	0	0.00307688
ENSG00000089177	KIF16B	2	6	0.00326772
ENSG00000162068	NTN3	1	1	0.00338802
ENSG00000215883	CYB5RL	1	1	0.00341025
ENSG00000181778	TMEM252	1	0	0.00343605
ENSG00000136235	GPNMB	1	1	0.00347562
ENSG00000180776	ZDHHC20	1	1	0.00353716
ENSG00000168060	NAALADL1	1	1	0.00371503
ENSG00000100461	RBM23	1	1	0.00372574
ENSG00000124795	DEK	1	0	0.00383206
ENSG00000158859	ADAMTS4	1	1	0.00407938
ENSG00000166278	C2	2	4	0.00417294
ENSG00000132122	SPATA6	1	1	0.00419176
ENSG00000084710	EFR3B	1	0	0.00422851
ENSG00000167757	KLK11	1	0	0.00427669
ENSG00000154133	ROBO4	1	1	0.00432313
ENSG00000113240	CLK4	1	1	0.00438196
ENSG00000156886	ITGAD	1	1	0.00466896
ENSG00000213853	EMP2	1	1	0.00482543
ENSG00000085999	RAD54L	1	1	0.00485714
ENSG00000112855	HARS2	1	2	0.00493303
ENSG00000088035	ALG6	1	1	0.00494801
ENSG00000158477	CD1A	1	2	0.00500829
ENSG00000105278	ZFR2	1	1	0.00508795
ENSG00000136243	NUP42	1	1	0.0053852
ENSG00000084731	KIF3C	1	0	0.0056987
ENSG00000185404	SP140L	1	0	0.0056987
ENSG00000185909	KLHDC8B	1	0	0.00581993
ENSG00000174996	KLC2	1	1	0.00583823
ENSG00000110446	SLC15A3	1	1	0.00593653
ENSG00000136897	MRPL50	1	1	0.00599579
ENSG00000107201	DDX58	1	1	0.00609235
ENSG00000148288	GBGT1	1	1	0.00618428
ENSG00000204852	TCTN1	1	2	0.00632223
ENSG00000174498	IGDCC3	1	2	0.00652775
ENSG00000213672	NCKIPSD	1	0	0.00662444
ENSG00000089127	OAS1	1	1	0.00680118
ENSG00000173809	TDRD12	1	1	0.00688605
ENSG00000167619	TMEM145	1	2	0.00688889
ENSG00000001630	CYP51A1	1	1	0.00712199
ENSG00000198369	SPRED2	1	1	0.00720401
ENSG00000127325	BEST3	1	2	0.00720888
ENSG00000221829	FANCG	1	2	0.00725046
ENSG00000204897	KRT25	1	1	0.00750698
ENSG00000146409	SLC18B1	1	2	0.0076619
ENSG00000070371	CLTCL1	2	6	0.00769922
ENSG00000089220	PEBP1	1	1	0.00788681
ENSG00000161996	WDR90	2	9	0.00793287
ENSG00000168056	LTBP3	1	1	0.00807257
ENSG00000107249	GLIS3	1	1	0.00807469
ENSG00000188175	HEPACAM2	1	2	0.00808627
ENSG00000104973	MED25	1	2	0.00808693
ENSG00000154485	MMP21	1	2	0.00809229
ENSG00000150628	SPATA4	1	2	0.00829205
ENSG00000136404	TM6SF1	1	1	0.00856023
ENSG00000103043	VAC14	1	1	0.00867641
ENSG00000116761	CTH	1	2	0.00875299
ENSG00000177646	ACAD9	1	1	0.00880035
ENSG00000197901	SLC22A6	1	1	0.00888204
ENSG00000096654	ZNF184	1	2	0.00911166
ENSG00000164089	ETNPPL	1	2	0.00920191
ENSG00000107959	PITRM1	1	2	0.00963304
ENSG00000163359	COL6A3	1	3	0.00964215
ENSG00000197181	PIWIL2	1	1	0.00970818
ENSG00000117139	KDM5B	1	1	0.00990794
ENSG00000099812	MISP	1	2	0.00996486
ENSG00000213445	SIPA1	1	1	0.0100367
ENSG00000070950	RAD18	1	1	0.0103675
ENSG00000082293	COL19A1	1	1	0.0105957
ENSG00000141258	SGSM2	1	2	0.011094
ENSG00000179988	PSTK	1	1	0.0111125
ENSG00000110002	VWA5A	1	2	0.0112513
ENSG00000167632	TRAPPC9	1	1	0.0112755
ENSG00000033011	ALG1	1	2	0.0113221
ENSG00000152910	CNTNAP4	1	2	0.011552
ENSG00000083857	FAT1	1	1	0.0117554
ENSG00000006652	IFRD1	1	0	0.0118584
ENSG00000251692	PTX4	1	0	0.0118584
ENSG00000168026	TTC21A	1	3	0.0121383
ENSG00000119900	OGFRL1	1	1	0.012179
ENSG00000149506	ZP1	1	2	0.0124334
ENSG00000138400	MDH1B	2	0	0.0129416
ENSG00000134013	LOXL2	1	2	0.0129822
ENSG00000198799	LRIG2	1	2	0.0130004
ENSG00000153208	MERTK	1	3	0.0131274
ENSG00000167676	PLIN4	1	1	0.0139846
ENSG00000156049	GNA14	1	3	0.0141221
ENSG00000091181	IL5RA	1	1	0.0142745
ENSG00000170419	VSTM2A	1	0	0.014637
ENSG00000104361	NIPAL2	1	3	0.0146462
ENSG00000102977	ACD	1	1	0.014697
ENSG00000196139	AKR1C3	1	4	0.015233
ENSG00000092529	CAPN3	1	3	0.0156435
ENSG00000174837	ADGRE1	1	2	0.0161175
ENSG00000067057	PFKP	1	3	0.0162742
ENSG00000178226	PRSS36	1	3	0.0163015
ENSG00000073169	SELENOO	1	3	0.0163638
ENSG00000169683	LRRC45	1	1	0.0163663
ENSG00000123609	NMI	1	3	0.0164961
ENSG00000142798	HSPG2	1	4	0.0168307
ENSG00000143199	ADCY10	1	3	0.0175736
ENSG00000128699	ORMDL1	1	1	0.0176514
ENSG00000110013	SIAE	1	1	0.0177658
ENSG00000140398	NEIL1	1	3	0.0181171
ENSG00000099219	ERMP1	1	4	0.0182056
ENSG00000166819	PLIN1	1	3	0.0184992
ENSG00000114904	NEK4	1	3	0.0186046
ENSG00000164308	ERAP2	1	2	0.0189068
ENSG00000142039	CCDC97	1	4	0.0199423
ENSG00000164068	RNF123	1	0	0.020343
ENSG00000177675	CD163L1	1	4	0.0204415
ENSG00000196460	RFX8	1	3	0.0207446
ENSG00000135114	OASL	1	1	0.0213538
ENSG00000080189	SLC35C2	1	2	0.0214956
ENSG00000141098	GFOD2	1	0	0.0221399
ENSG00000163449	TMEM169	1	0	0.0221399
ENSG00000138115	CYP2C8	1	3	0.0225092
ENSG00000074582	BCS1L	1	4	0.0227948
ENSG00000198707	CEP290	2	11	0.0240974
ENSG00000050555	LAMC3	1	3	0.0244759
ENSG00000129744	ART1	1	3	0.0250873
ENSG00000175352	NRIP3	1	2	0.0252312
ENSG00000170175	CHRNB1	1	3	0.0257582
ENSG00000174292	TNK1	1	4	0.0258639
ENSG00000028116	VRK2	1	2	0.0259978
ENSG00000188487	INSC	1	4	0.026404
ENSG00000165905	LARGE2	1	5	0.0276014
ENSG00000022556	NLRP2	1	4	0.0278957
ENSG00000115970	THADA	1	5	0.0293885
ENSG00000198056	PRIM1	1	2	0.0295616
ENSG00000204634	TBC1D8	1	5	0.0297169
ENSG00000154134	ROBO3	1	2	0.0299806
ENSG00000140950	MEAK7	1	5	0.0302976
ENSG00000128159	TUBGCP6	1	4	0.0309259
ENSG00000134575	ACP2	1	0	0.0313856
ENSG00000135205	CCDC146	1	5	0.0320935
ENSG00000172053	QARS1	1	5	0.0321269
ENSG00000102890	ELMO3	1	1	0.033092
ENSG00000178997	EXD1	1	4	0.0337698
ENSG00000184716	SERINC4	1	3	0.033978
ENSG00000130158	DOCK6	1	6	0.0352962
ENSG00000149311	ATM	1	5	0.0358526
ENSG00000172901	LVRN	1	2	0.0363116
ENSG00000186191	BPIFB4	1	5	0.0366175
ENSG00000123104	ITPR2	1	5	0.0368095
ENSG00000155657	TTN	2	20	0.0375008
ENSG00000006788	MYH13	1	5	0.037961
ENSG00000185345	PRKN	1	4	0.0380855
ENSG00000089012	SIRPG	1	0	0.0388969
ENSG00000167280	ENGASE	1	6	0.0391213
ENSG00000170324	FRMPD2	1	5	0.0397953
ENSG00000184611	KCNH7	1	0	0.0400067
ENSG00000151376	ME3	1	1	0.0406752
ENSG00000088387	DOCK9	1	3	0.04083
ENSG00000083457	ITGAE	1	5	0.0422324
ENSG00000176225	RTTN	1	5	0.044402
ENSG00000214711	CAPN14	1	5	0.0446492
ENSG00000203995	ZYG11A	1	4	0.0446962
ENSG00000146530	VWDE	1	5	0.0502368
ENSG00000079739	PGM1	1	2	0.0507371
ENSG00000250799	PRODH2	1	5	0.0538948
ENSG00000143954	REG3G	1	4	0.0540543
ENSG00000163092	XIRP2	1	8	0.0550906
ENSG00000146350	TBC1D32	1	6	0.0552995
ENSG00000163817	SLC6A20	1	7	0.0553949
ENSG00000137857	DUOX1	1	6	0.0558162
ENSG00000185264	TEX33	1	3	0.0562189
ENSG00000084636	COL16A1	1	7	0.0584696
ENSG00000158486	DNAH3	1	9	0.0587844
ENSG00000184956	MUC6	1	7	0.0590362
ENSG00000164199	ADGRV1	1	7	0.0595367
ENSG00000162542	TMCO4	1	4	0.0596495
ENSG00000197299	BLM	1	6	0.0617626
ENSG00000176531	PHLDB3	1	8	0.064578
ENSG00000118557	PMFBP1	1	4	0.0675995
ENSG00000008869	HEATR5B	1	3	0.0693582
ENSG00000183856	IQGAP3	1	10	0.077488
ENSG00000036448	MYOM2	1	9	0.0792318
ENSG00000136011	STAB2	1	8	0.0799371
ENSG00000105186	ANKRD27	1	8	0.0809848
ENSG00000112936	C7	1	7	0.0885326
ENSG00000115267	IFIH1	1	10	0.0913505
ENSG00000058335	RASGRF1	0	1	0.105788
ENSG00000153574	RPIA	0	1	0.105788
ENSG00000198952	SMG5	0	1	0.105788
ENSG00000115423	DNAH6	1	12	0.109877
ENSG00000120318	ARAP3	0	1	0.112352
ENSG00000163938	GNL3	0	1	0.11323
ENSG00000099204	ABLIM1	0	1	0.113558
ENSG00000116183	PAPPA2	0	1	0.113558
ENSG00000116750	UCHL5	0	1	0.113939
ENSG00000147647	DPYS	1	9	0.114056
ENSG00000144290	SLC4A10	0	1	0.114601
ENSG00000146166	LGSN	0	1	0.115095
ENSG00000174611	KY	0	1	0.115095
ENSG00000204348	DXO	0	1	0.11636
ENSG00000141665	FBXO15	0	1	0.116549
ENSG00000182150	ERCC6L2	0	1	0.118226
ENSG00000143028	SYPL2	0	1	0.118906
ENSG00000144619	CNTN4	0	1	0.118906
ENSG00000140025	EFCAB11	0	1	0.119466
ENSG00000071242	RPS6KA2	0	1	0.119539
ENSG00000166033	HTRA1	0	1	0.119539
ENSG00000137251	TINAG	0	1	0.11995
ENSG00000169884	WNT10B	0	1	0.11995
ENSG00000110906	KCTD10	0	1	0.121143
ENSG00000250067	YJEFN3	0	1	0.121143
ENSG00000162341	TPCN2	0	1	0.121358
ENSG00000141452	RMC1	0	1	0.121849
ENSG00000089558	KCNH4	0	1	0.122237
ENSG00000130921	C12orf65	0	1	0.122715
ENSG00000157800	SLC37A3	0	1	0.122715
ENSG00000105221	AKT2	0	1	0.124026
ENSG00000100722	ZC3H14	0	1	0.12424
ENSG00000140450	ARRDC4	0	1	0.12424
ENSG00000127948	POR	0	1	0.12454
ENSG00000143337	TOR1AIP1	0	1	0.124628
ENSG00000167720	SRR	0	1	0.124628
ENSG00000144488	ESPNL	0	1	0.124873
ENSG00000081386	ZNF510	0	1	0.125126
ENSG00000104442	ARMC1	0	1	0.125126
ENSG00000167580	AQP2	0	1	0.1252
ENSG00000078674	PCM1	0	1	0.125298
ENSG00000144815	NXPE3	0	1	0.12547
ENSG00000165832	TRUB1	0	1	0.125545
ENSG00000167113	COQ4	0	1	0.125545
ENSG00000157214	STEAP2	0	1	0.126913
ENSG00000140995	DEF8	0	1	0.127523
ENSG00000111358	GTF2H3	0	1	0.12776
ENSG00000119041	GTF3C3	0	1	0.12776
ENSG00000169019	COMMD8	0	1	0.127953
ENSG00000171345	KRT19	0	1	0.127953
ENSG00000116729	WLS	0	1	0.128063
ENSG00000111696	NT5DC3	0	1	0.128113
ENSG00000164287	CDC20B	0	1	0.128114
ENSG00000181982	CCDC149	0	1	0.12863
ENSG00000131142	CCL25	0	1	0.128965
ENSG00000111667	USP5	0	1	0.128989
ENSG00000204673	AKT1S1	0	1	0.129388
ENSG00000068885	IFT80	0	1	0.129505
ENSG00000153250	RBMS1	0	1	0.129505
ENSG00000103168	TAF1C	0	1	0.129515
ENSG00000104368	PLAT	0	1	0.129515
ENSG00000118508	RAB32	0	1	0.129515
ENSG00000184305	CCSER1	0	1	0.129852
ENSG00000125630	POLR1B	0	1	0.129885
ENSG00000133048	CHI3L1	0	1	0.13051
ENSG00000186407	CD300E	0	1	0.13051
ENSG00000165716	DIPK1B	0	1	0.130533
ENSG00000160948	VPS28	0	1	0.130729
ENSG00000161905	ALOX15	0	1	0.131044
ENSG00000133742	CA1	0	1	0.131124
ENSG00000103126	AXIN1	0	1	0.131229
ENSG00000189376	C8orf76	0	1	0.131363
ENSG00000117984	CTSD	0	1	0.131404
ENSG00000196584	XRCC2	0	1	0.131404
ENSG00000198131	ZNF544	0	1	0.132085
ENSG00000109775	UFSP2	0	1	0.132097
ENSG00000152463	OLAH	0	1	0.132332
ENSG00000171827	ZNF570	0	1	0.132332
ENSG00000163939	PBRM1	0	1	0.132378
ENSG00000110172	CHORDC1	0	1	0.132474
ENSG00000143198	MGST3	0	1	0.132474
ENSG00000173156	RHOD	0	1	0.132592
ENSG00000116688	MFN2	0	1	0.132676
ENSG00000129235	TXNDC17	0	1	0.132676
ENSG00000228716	DHFR	0	1	0.132762
ENSG00000173611	SCAI	0	1	0.132876
ENSG00000091140	DLD	0	1	0.132959
ENSG00000114670	NEK11	0	1	0.132959
ENSG00000204161	TMEM273	0	1	0.133171
ENSG00000132603	NIP7	0	1	0.133178
ENSG00000115183	TANC1	0	1	0.133474
ENSG00000178084	HTR3C	0	1	0.133586
ENSG00000053702	NRIP2	0	1	0.133798
ENSG00000115598	IL1RL2	0	1	0.133798
ENSG00000139722	VPS37B	0	1	0.133798
ENSG00000145715	RASA1	0	1	0.133798
ENSG00000197429	IPP	0	1	0.133798
ENSG00000110422	HIPK3	0	1	0.133837
ENSG00000133612	AGAP3	0	1	0.133837
ENSG00000166927	MS4A7	0	1	0.133894
ENSG00000132024	CC2D1A	0	1	0.13393
ENSG00000171530	TBCA	0	1	0.13393
ENSG00000166295	ANAPC16	0	1	0.134055
ENSG00000178425	NT5DC1	0	1	0.134055
ENSG00000148180	GSN	0	1	0.134063
ENSG00000133961	NUMB	0	1	0.134188
ENSG00000088812	ATRN	0	1	0.134245
ENSG00000204160	ZDHHC18	0	1	0.134245
ENSG00000256870	SLC5A8	0	1	0.134245
ENSG00000113845	TIMMDC1	0	1	0.134258
ENSG00000134318	ROCK2	0	1	0.134258
ENSG00000102445	RUBCNL	0	1	0.134603
ENSG00000138686	BBS7	0	1	0.13463
ENSG00000119147	ECRG4	0	1	0.134659
ENSG00000143630	HCN3	0	1	0.134659
ENSG00000196159	FAT4	0	1	0.134659
ENSG00000139531	SUOX	0	1	0.134904
ENSG00000248592	STIMATE-MUSTN1	0	1	0.134915
ENSG00000157426	AASDH	0	1	0.13506
ENSG00000164053	ATRIP	0	1	0.13506
ENSG00000113319	RASGRF2	0	1	0.135814
ENSG00000132514	CLEC10A	0	1	0.135814
ENSG00000137171	KLC4	0	1	0.135814
ENSG00000138639	ARHGAP24	0	1	0.136227
ENSG00000152767	FARP1	0	1	0.136227
ENSG00000156873	PHKG2	0	1	0.136386
ENSG00000092445	TYRO3	0	1	0.136449
ENSG00000241697	TMEFF1	0	1	0.136449
ENSG00000196504	PRPF40A	0	1	0.136612
ENSG00000125871	MGME1	0	1	0.136685
ENSG00000135362	PRR5L	0	1	0.136685
ENSG00000145626	UGT3A1	0	1	0.136685
ENSG00000185033	SEMA4B	0	1	0.136685
ENSG00000036054	TBC1D23	0	1	0.136712
ENSG00000196118	CCDC189	0	1	0.136712
ENSG00000004866	ST7	0	1	0.136881
ENSG00000174032	SLC25A30	0	1	0.136881
ENSG00000092148	HECTD1	0	1	0.136886
ENSG00000084693	AGBL5	0	1	0.137348
ENSG00000134490	TMEM241	0	1	0.137421
ENSG00000145833	DDX46	0	1	0.137563
ENSG00000115232	ITGA4	0	1	0.137844
ENSG00000125503	PPP1R12C	0	1	0.137844
ENSG00000181458	TMEM45A	0	1	0.137948
ENSG00000168754	FAM178B	0	1	0.137973
ENSG00000076201	PTPN23	0	1	0.138052
ENSG00000155755	TMEM237	0	1	0.138268
ENSG00000069956	MAPK6	0	1	0.138424
ENSG00000138079	SLC3A1	0	1	0.138424
ENSG00000145936	KCNMB1	0	1	0.138424
ENSG00000104783	KCNN4	0	1	0.138897
ENSG00000121900	TMEM54	0	1	0.138897
ENSG00000125755	SYMPK	0	1	0.138897
ENSG00000144567	RETREG2	0	1	0.139126
ENSG00000152034	MCHR2	0	1	0.139126
ENSG00000120725	SIL1	0	1	0.139142
ENSG00000111203	ITFG2	0	1	0.139284
ENSG00000118997	DNAH7	1	15	0.139445
ENSG00000142623	PADI1	0	1	0.139458
ENSG00000206561	COLQ	0	1	0.139458
ENSG00000077984	CST7	0	1	0.139701
ENSG00000124493	GRM4	0	1	0.139701
ENSG00000151715	TMEM45B	0	1	0.139701
ENSG00000134452	FBH1	0	2	0.139707
ENSG00000167139	TBC1D21	0	1	0.139707
ENSG00000066084	DIP2B	0	1	0.139735
ENSG00000146151	HMGCLL1	0	1	0.139735
ENSG00000167671	UBXN6	0	1	0.139735
ENSG00000073067	CYP2W1	0	1	0.139769
ENSG00000135776	ABCB10	0	1	0.139769
ENSG00000152061	RABGAP1L	0	1	0.139769
ENSG00000188522	FAM83G	0	1	0.139923
ENSG00000165509	MAGEC3	0	1	0.139966
ENSG00000197702	PARVA	0	1	0.139966
ENSG00000198542	ITGBL1	0	1	0.139966
ENSG00000177084	POLE	0	1	0.140075
ENSG00000197044	ZNF441	0	1	0.140075
ENSG00000113811	SELENOK	0	1	0.140275
ENSG00000204669	C9orf57	0	1	0.140275
ENSG00000109107	ALDOC	0	1	0.140422
ENSG00000151490	PTPRO	0	1	0.140422
ENSG00000181638	ZFP41	0	1	0.140584
ENSG00000015133	CCDC88C	0	1	0.140813
ENSG00000089597	GANAB	0	1	0.140813
ENSG00000157388	CACNA1D	0	1	0.140813
ENSG00000115687	PASK	1	12	0.140928
ENSG00000131378	RFTN1	0	1	0.140949
ENSG00000175782	SLC35E3	0	1	0.140949
ENSG00000067177	PHKA1	0	1	0.141019
ENSG00000104936	DMPK	0	1	0.141019
ENSG00000213023	SYT3	0	1	0.141033
ENSG00000106070	GRB10	0	1	0.141079
ENSG00000100065	CARD10	0	1	0.1411
ENSG00000135775	COG2	0	1	0.141379
ENSG00000154415	PPP1R3A	0	1	0.141379
ENSG00000052126	PLEKHA5	0	1	0.141449
ENSG00000137413	TAF8	0	1	0.141449
ENSG00000069122	ADGRF5	0	1	0.141531
ENSG00000133138	TBC1D8B	0	1	0.141693
ENSG00000154639	CXADR	0	1	0.141693
ENSG00000179751	SYCN	0	1	0.141693
ENSG00000025796	SEC63	0	1	0.141842
ENSG00000146966	DENND2A	0	1	0.141911
ENSG00000147003	CLTRN	0	1	0.142022
ENSG00000187626	ZKSCAN4	0	1	0.142022
ENSG00000160886	LY6K	0	1	0.142114
ENSG00000198752	CDC42BPB	0	1	0.142114
ENSG00000113356	POLR3G	0	1	0.142325
ENSG00000185189	NRBP2	0	1	0.142325
ENSG00000137868	STRA6	0	1	0.142482
ENSG00000198171	DDRGK1	0	1	0.142482
ENSG00000134042	MRO	0	1	0.142845
ENSG00000100271	TTLL1	0	1	0.142959
ENSG00000183607	GKN2	0	1	0.143057
ENSG00000183644	HOATZ	0	1	0.143057
ENSG00000188186	LAMTOR4	0	1	0.143295
ENSG00000124535	WRNIP1	0	1	0.143308
ENSG00000132669	RIN2	0	1	0.143308
ENSG00000167106	FAM102A	0	1	0.143308
ENSG00000088930	XRN2	0	1	0.143337
ENSG00000120437	ACAT2	0	1	0.143399
ENSG00000137312	FLOT1	0	1	0.143399
ENSG00000150907	FOXO1	0	1	0.143399
ENSG00000184307	ZDHHC23	0	1	0.143606
ENSG00000248385	TARM1	0	1	0.143606
ENSG00000173200	PARP15	0	1	0.143609
ENSG00000100253	MIOX	0	1	0.14382
ENSG00000213246	SUPT4H1	0	1	0.14382
ENSG00000049245	VAMP3	0	1	0.143986
ENSG00000088205	DDX18	0	1	0.143986
ENSG00000103121	CMC2	0	1	0.143986
ENSG00000133460	SLC2A11	0	1	0.14405
ENSG00000150540	HNMT	0	1	0.144136
ENSG00000161021	MAML1	0	1	0.144136
ENSG00000092531	SNAP23	0	1	0.14415
ENSG00000188909	BSX	0	1	0.14415
ENSG00000128602	SMO	0	1	0.144444
ENSG00000149452	SLC22A8	0	1	0.144675
ENSG00000172009	THOP1	0	1	0.1449
ENSG00000174373	RALGAPA1	0	1	0.1449
ENSG00000077254	USP33	0	1	0.145
ENSG00000132881	CPLANE2	0	1	0.145057
ENSG00000077348	EXOSC5	0	1	0.145212
ENSG00000204410	MSH5	0	1	0.145286
ENSG00000130377	ACSBG2	0	1	0.145314
ENSG00000173467	AGR3	0	1	0.145314
ENSG00000001617	SEMA3F	0	1	0.145403
ENSG00000121903	ZSCAN20	0	1	0.145403
ENSG00000149809	TM7SF2	0	1	0.145403
ENSG00000154839	SKA1	0	1	0.145448
ENSG00000103942	HOMER2	0	2	0.14548
ENSG00000149781	FERMT3	0	1	0.14548
ENSG00000197467	COL13A1	0	1	0.14548
ENSG00000140505	CYP1A2	0	1	0.145733
ENSG00000114902	SPCS1	0	1	0.14591
ENSG00000149262	INTS4	0	1	0.14591
ENSG00000163687	DNASE1L3	0	1	0.14591
ENSG00000186628	FSD2	0	1	0.146072
ENSG00000104231	ZFAND1	0	1	0.146081
ENSG00000115290	GRB14	0	1	0.146164
ENSG00000094755	GABRP	0	1	0.14629
ENSG00000134240	HMGCS2	0	1	0.14629
ENSG00000122477	LRRC39	0	1	0.146316
ENSG00000137207	YIPF3	0	1	0.146316
ENSG00000112796	ENPP5	0	2	0.146384
ENSG00000140022	STON2	0	1	0.146384
ENSG00000173714	WFIKKN2	0	1	0.146552
ENSG00000108242	CYP2C18	0	1	0.146584
ENSG00000078061	ARAF	0	1	0.146773
ENSG00000006071	ABCC8	0	1	0.146803
ENSG00000016391	CHDH	0	1	0.146803
ENSG00000166796	LDHC	0	1	0.146803
ENSG00000188295	ZNF669	0	1	0.146803
ENSG00000197121	PGAP1	0	1	0.146803
ENSG00000102362	SYTL4	0	1	0.146912
ENSG00000136122	BORA	0	1	0.146912
ENSG00000079150	FKBP7	0	1	0.147233
ENSG00000139714	MORN3	0	1	0.147233
ENSG00000129988	LBP	0	1	0.147328
ENSG00000164300	SERINC5	0	1	0.147328
ENSG00000138463	SLC49A4	0	1	0.147477
ENSG00000186998	EMID1	0	1	0.147477
ENSG00000197323	TRIM33	0	1	0.147477
ENSG00000241468	ATP5MF	0	1	0.147477
ENSG00000174891	RSRC1	0	1	0.147566
ENSG00000089048	ESF1	0	1	0.147605
ENSG00000101890	GUCY2F	0	1	0.147605
ENSG00000168488	ATXN2L	0	1	0.147663
ENSG00000185261	KIAA0825	0	1	0.147663
ENSG00000087237	CETP	0	1	0.147684
ENSG00000185046	ANKS1B	0	1	0.147684
ENSG00000156509	FBXO43	0	1	0.147817
ENSG00000136014	USP44	0	1	0.147852
ENSG00000137216	TMEM63B	0	1	0.147852
ENSG00000147614	ATP6V0D2	0	1	0.147852
ENSG00000180245	RRH	0	1	0.14798
ENSG00000248098	BCKDHA	0	1	0.14798
ENSG00000008277	ADAM22	0	1	0.148017
ENSG00000100478	AP4S1	0	1	0.148072
ENSG00000181016	LSMEM1	0	1	0.148234
ENSG00000111404	RERGL	0	1	0.148433
ENSG00000073050	XRCC1	0	1	0.148497
ENSG00000186648	CARMIL3	0	2	0.148497
ENSG00000035928	RFC1	0	1	0.148518
ENSG00000087206	UIMC1	0	1	0.148518
ENSG00000122741	DCAF10	0	1	0.148559
ENSG00000186334	SLC36A3	0	1	0.148559
ENSG00000102781	KATNAL1	0	1	0.14859
ENSG00000172731	LRRC20	0	1	0.14859
ENSG00000110245	APOC3	0	1	0.14884
ENSG00000134461	ANKRD16	0	1	0.14884
ENSG00000112679	DUSP22	0	1	0.148888
ENSG00000162779	AXDND1	0	1	0.148888
ENSG00000151320	AKAP6	0	1	0.148904
ENSG00000125149	C16orf70	0	1	0.148919
ENSG00000140459	CYP11A1	0	1	0.149033
ENSG00000105650	PDE4C	0	1	0.149129
ENSG00000181222	POLR2A	0	1	0.149129
ENSG00000110429	FBXO3	0	1	0.149378
ENSG00000138756	BMP2K	0	1	0.149378
ENSG00000243156	MICAL3	0	1	0.149378
ENSG00000139648	KRT71	0	1	0.149411
ENSG00000157766	ACAN	0	1	0.149411
ENSG00000186687	LYRM7	0	1	0.149411
ENSG00000149150	SLC43A1	0	1	0.149425
ENSG00000153885	KCTD15	0	1	0.149425
ENSG00000159164	SV2A	0	1	0.149425
ENSG00000049656	CLPTM1L	0	1	0.149627
ENSG00000076662	ICAM3	0	1	0.149627
ENSG00000182919	C11orf54	0	1	0.149627
ENSG00000141738	GRB7	0	1	0.149651
ENSG00000165171	METTL27	0	1	0.149717
ENSG00000092020	PPP2R3C	0	1	0.149781
ENSG00000131080	EDA2R	0	1	0.149781
ENSG00000156990	RPUSD3	0	1	0.149842
ENSG00000169169	CPT1C	0	1	0.149842
ENSG00000105393	BABAM1	0	1	0.149891
ENSG00000141750	STAC2	0	1	0.149891
ENSG00000177483	RBM44	0	1	0.149965
ENSG00000110375	UPK2	0	1	0.149985
ENSG00000120256	LRP11	0	1	0.150019
ENSG00000006757	PNPLA4	0	1	0.150091
ENSG00000095059	DHPS	0	1	0.150139
ENSG00000149489	ROM1	0	1	0.150139
ENSG00000099860	GADD45B	0	1	0.150223
ENSG00000154920	EME1	0	1	0.150223
ENSG00000118420	UBE3D	0	1	0.150243
ENSG00000171403	KRT9	0	1	0.150243
ENSG00000144909	OSBPL11	0	1	0.150252
ENSG00000175582	RAB6A	0	1	0.150252
ENSG00000196859	KRT39	0	1	0.150252
ENSG00000129521	EGLN3	0	1	0.150303
ENSG00000170486	KRT72	0	1	0.150318
ENSG00000173848	NET1	0	1	0.150318
ENSG00000127995	CASD1	0	1	0.150423
ENSG00000175946	KLHL38	0	1	0.150657
ENSG00000178057	NDUFAF3	0	1	0.150706
ENSG00000089091	DZANK1	0	1	0.150745
ENSG00000125122	LRRC29	0	1	0.150745
ENSG00000172164	SNTB1	0	1	0.150745
ENSG00000181031	RPH3AL	0	1	0.150745
ENSG00000117280	RAB29	0	1	0.150796
ENSG00000271271	UGT2A2	0	1	0.150886
ENSG00000138134	STAMBPL1	0	2	0.151091
ENSG00000139263	LRIG3	0	1	0.151091
ENSG00000120662	MTRF1	0	1	0.151338
ENSG00000135090	TAOK3	0	1	0.151338
ENSG00000197208	SLC22A4	0	1	0.151419
ENSG00000137434	C6orf52	0	1	0.151496
ENSG00000182359	KBTBD3	0	1	0.151592
ENSG00000149932	TMEM219	0	1	0.151592
ENSG00000163513	TGFBR2	0	1	0.151592
ENSG00000130299	GTPBP3	0	1	0.151665
ENSG00000166106	ADAMTS15	0	1	0.151665
ENSG00000183960	KCNH8	0	1	0.15167
ENSG00000243667	WDR92	0	1	0.15167
ENSG00000142330	CAPN10	0	1	0.151786
ENSG00000162444	RBP7	0	1	0.151905
ENSG00000165409	TSHR	0	1	0.151931
ENSG00000119471	HSDL2	0	1	0.151941
ENSG00000164506	STXBP5	0	1	0.151941
ENSG00000125827	TMX4	0	1	0.151955
ENSG00000134028	ADAMDEC1	0	1	0.152159
ENSG00000147535	PLPP5	0	1	0.152159
ENSG00000167601	AXL	0	1	0.152159
ENSG00000186952	TMEM232	0	1	0.152359
ENSG00000182223	ZAR1	0	1	0.152373
ENSG00000124107	SLPI	0	1	0.152393
ENSG00000130208	APOC1	0	1	0.152393
ENSG00000065609	SNAP91	0	1	0.15254
ENSG00000104537	ANXA13	0	1	0.15254
ENSG00000115355	CCDC88A	0	1	0.15254
ENSG00000129437	KLK14	0	1	0.152694
ENSG00000205856	C22orf42	0	1	0.152704
ENSG00000123146	ADGRE5	0	1	0.153102
ENSG00000164303	ENPP6	0	1	0.153102
ENSG00000154518	ATP5MC3	0	1	0.153193
ENSG00000154721	JAM2	0	1	0.153193
ENSG00000024526	DEPDC1	0	1	0.1532
ENSG00000113108	APBB3	0	1	0.153218
ENSG00000124067	SLC12A4	0	1	0.153332
ENSG00000096696	DSP	0	1	0.153697
ENSG00000119559	C19orf25	0	1	0.154106
ENSG00000234545	FAM133B	0	1	0.154106
ENSG00000105835	NAMPT	0	1	0.154261
ENSG00000138434	ITPRID2	0	1	0.154261
ENSG00000158077	NLRP14	0	1	0.154261
ENSG00000147852	VLDLR	0	1	0.15432
ENSG00000173517	PEAK1	0	1	0.154344
ENSG00000137819	PAQR5	0	1	0.154383
ENSG00000157060	SHCBP1L	0	1	0.154383
ENSG00000162601	MYSM1	0	1	0.154383
ENSG00000188611	ASAH2	0	1	0.154385
ENSG00000182511	FES	0	1	0.154627
ENSG00000111058	ACSS3	0	1	0.154647
ENSG00000157637	SLC38A10	0	1	0.154647
ENSG00000055208	TAB2	0	1	0.154716
ENSG00000204371	EHMT2	0	1	0.154716
ENSG00000203756	TMEM244	0	1	0.154768
ENSG00000014641	MDH1	0	1	0.154792
ENSG00000105849	POLR1F	0	1	0.154792
ENSG00000083782	EPYC	0	2	0.154852
ENSG00000141371	C17orf64	0	1	0.154852
ENSG00000103274	NUBP1	0	1	0.155051
ENSG00000185002	RFX6	0	1	0.155051
ENSG00000105248	YJU2	0	1	0.155093
ENSG00000178078	STAP2	0	1	0.155093
ENSG00000081800	SLC13A1	0	1	0.155125
ENSG00000137674	MMP20	0	1	0.155125
ENSG00000074842	MYDGF	0	1	0.155148
ENSG00000119979	DENND10	0	1	0.155148
ENSG00000135905	DOCK10	0	1	0.155148
ENSG00000163898	LIPH	0	1	0.155184
ENSG00000147872	PLIN2	0	1	0.155323
ENSG00000204257	HLA-DMA	0	1	0.155323
ENSG00000163380	LMOD3	0	1	0.155346
ENSG00000143363	PRUNE1	0	1	0.155437
ENSG00000172482	AGXT	0	1	0.155491
ENSG00000196911	KPNA5	0	1	0.155526
ENSG00000143257	NR1I3	0	1	0.155527
ENSG00000091138	SLC26A3	0	2	0.155645
ENSG00000188647	PTAR1	0	1	0.155653
ENSG00000101198	NKAIN4	0	1	0.155701
ENSG00000144659	SLC25A38	0	1	0.155895
ENSG00000140451	PIF1	0	1	0.155929
ENSG00000184502	GAST	0	1	0.155929
ENSG00000166450	PRTG	0	1	0.155964
ENSG00000138670	RASGEF1B	0	1	0.156065
ENSG00000196405	EVL	0	1	0.156065
ENSG00000151012	SLC7A11	0	1	0.156089
ENSG00000133789	SWAP70	0	1	0.156121
ENSG00000023697	DERA	0	1	0.156126
ENSG00000137804	NUSAP1	0	1	0.156126
ENSG00000112992	NNT	0	1	0.156132
ENSG00000143952	VPS54	0	1	0.156132
ENSG00000066294	CD84	0	1	0.156178
ENSG00000120659	TNFSF11	0	1	0.156178
ENSG00000127311	HELB	0	1	0.156178
ENSG00000157542	KCNJ6	0	1	0.156178
ENSG00000120733	KDM3B	0	1	0.156185
ENSG00000018699	TTC27	0	1	0.156223
ENSG00000156110	ADK	0	1	0.156223
ENSG00000162654	GBP4	0	1	0.156353
ENSG00000129691	ASH2L	0	1	0.156356
ENSG00000035499	DEPDC1B	0	1	0.156393
ENSG00000019144	PHLDB1	0	1	0.15663
ENSG00000057294	PKP2	0	2	0.15663
ENSG00000104856	RELB	0	1	0.15663
ENSG00000108433	GOSR2	0	1	0.156712
ENSG00000139193	CD27	0	1	0.156712
ENSG00000159650	UROC1	0	1	0.156712
ENSG00000141977	CIB3	0	1	0.156728
ENSG00000162129	CLPB	0	1	0.156728
ENSG00000116299	ELAPOR1	0	1	0.156783
ENSG00000215305	VPS16	0	1	0.156783
ENSG00000100162	CENPM	0	1	0.156801
ENSG00000107789	MINPP1	0	1	0.156868
ENSG00000155034	FBXL18	0	1	0.156908
ENSG00000138303	ASCC1	0	1	0.156955
ENSG00000197992	CLEC9A	0	1	0.157011
ENSG00000094914	AAAS	0	1	0.157017
ENSG00000172867	KRT2	0	1	0.157017
ENSG00000204311	PJVK	0	1	0.157017
ENSG00000100416	TRMU	0	1	0.157244
ENSG00000138435	CHRNA1	0	1	0.157244
ENSG00000173699	SPATA3	0	1	0.157244
ENSG00000163026	WDCP	0	1	0.157271
ENSG00000140403	DNAJA4	0	1	0.157308
ENSG00000188992	LIPI	0	1	0.157308
ENSG00000103111	MON1B	0	1	0.157406
ENSG00000130167	TSPAN16	0	1	0.157406
ENSG00000138190	EXOC6	0	1	0.157424
ENSG00000170099	SERPINA6	0	1	0.157551
ENSG00000114439	BBX	0	1	0.157649
ENSG00000197448	GSTK1	0	1	0.157649
ENSG00000165272	AQP3	0	1	0.157771
ENSG00000176771	NCKAP5	0	1	0.157837
ENSG00000179889	PDXDC1	0	1	0.157837
ENSG00000181513	ACBD4	0	1	0.157837
ENSG00000095970	TREM2	0	1	0.157872
ENSG00000197442	MAP3K5	0	1	0.157881
ENSG00000172349	IL16	0	1	0.157927
ENSG00000129749	CHRNA10	0	1	0.157929
ENSG00000213213	CCDC183	0	1	0.157937
ENSG00000113719	ERGIC1	0	1	0.158057
ENSG00000133703	KRAS	0	1	0.158057
ENSG00000112053	SLC26A8	0	1	0.158066
ENSG00000114200	BCHE	0	1	0.158066
ENSG00000233276	GPX1	0	1	0.158082
ENSG00000163291	PAQR3	0	1	0.158155
ENSG00000172890	NADSYN1	0	1	0.158164
ENSG00000213339	QTRT1	0	2	0.158164
ENSG00000140416	TPM1	0	1	0.158225
ENSG00000100150	DEPDC5	0	1	0.158298
ENSG00000205978	NYNRIN	0	1	0.158298
ENSG00000134954	ETS1	0	1	0.158356
ENSG00000136238	RAC1	0	1	0.158356
ENSG00000096996	IL12RB1	0	1	0.158365
ENSG00000109805	NCAPG	0	1	0.158365
ENSG00000139567	ACVRL1	0	1	0.158397
ENSG00000146670	CDCA5	0	1	0.158397
ENSG00000189325	BNIP5	0	1	0.158397
ENSG00000075826	SEC31B	1	9	0.158486
ENSG00000006555	TTC22	0	1	0.158586
ENSG00000158806	NPM2	0	1	0.158586
ENSG00000123992	DNPEP	0	1	0.158703
ENSG00000121764	HCRTR1	0	1	0.158736
ENSG00000141956	PRDM15	0	1	0.158736
ENSG00000068878	PSME4	0	1	0.158775
ENSG00000185666	SYN3	0	1	0.158775
ENSG00000198715	GLMP	0	1	0.158775
ENSG00000073008	PVR	0	1	0.1588
ENSG00000133858	ZFC3H1	0	1	0.158823
ENSG00000156853	ZNF689	0	1	0.158847
ENSG00000109272	PF4V1	0	1	0.158917
ENSG00000081177	EXD2	0	1	0.158985
ENSG00000109534	GAR1	0	1	0.158985
ENSG00000133835	HSD17B4	0	1	0.159026
ENSG00000184999	SLC22A10	0	1	0.159366
ENSG00000204965	PCDHA5	0	1	0.159366
ENSG00000125409	TEKT3	0	1	0.159429
ENSG00000104518	GSDMD	0	1	0.159537
ENSG00000196867	ZFP28	0	1	0.159885
ENSG00000179914	ITLN1	0	1	0.159959
ENSG00000198168	SVIP	0	1	0.159959
ENSG00000022567	SLC45A4	0	1	0.160042
ENSG00000108963	DPH1	0	1	0.160042
ENSG00000108417	KRT37	0	1	0.160084
ENSG00000148843	PDCD11	0	1	0.16012
ENSG00000174483	BBS1	0	1	0.16012
ENSG00000204843	DCTN1	0	1	0.16012
ENSG00000171853	TRAPPC12	0	1	0.160158
ENSG00000196455	PIK3R4	0	1	0.160179
ENSG00000114021	NIT2	0	1	0.160222
ENSG00000004975	DVL2	0	1	0.160297
ENSG00000164171	ITGA2	0	1	0.160297
ENSG00000169902	TPST1	0	1	0.160297
ENSG00000182010	RTKN2	0	1	0.160311
ENSG00000171817	ZNF540	0	1	0.160444
ENSG00000160326	SLC2A6	0	1	0.160613
ENSG00000148541	FAM13C	0	1	0.160619
ENSG00000188505	NCCRP1	0	1	0.160619
ENSG00000196497	IPO4	0	1	0.160647
ENSG00000185271	KLHL33	0	1	0.16073
ENSG00000132510	KDM6B	0	1	0.160829
ENSG00000166152	C16orf78	0	1	0.160829
ENSG00000215203	GRXCR1	0	1	0.160829
ENSG00000105053	VRK3	0	1	0.160854
ENSG00000153820	SPHKAP	0	1	0.160854
ENSG00000167699	GLOD4	0	1	0.161015
ENSG00000184743	ATL3	0	1	0.161015
ENSG00000103811	CTSH	0	1	0.161174
ENSG00000185069	KRT76	0	1	0.161174
ENSG00000106128	GHRHR	0	1	0.161176
ENSG00000164620	RELL2	0	1	0.161176
ENSG00000133246	PRAM1	0	1	0.161189
ENSG00000158615	PPP1R15B	0	1	0.161189
ENSG00000182271	TMIGD1	0	1	0.161218
ENSG00000120254	MTHFD1L	0	1	0.161236
ENSG00000155636	RBM45	0	1	0.161236
ENSG00000105717	PBX4	0	1	0.16126
ENSG00000151465	CDC123	0	1	0.161349
ENSG00000198821	CD247	0	1	0.16135
ENSG00000066135	KDM4A	0	1	0.161369
ENSG00000087502	ERGIC2	0	1	0.161369
ENSG00000164934	DCAF13	0	1	0.161369
ENSG00000214160	ALG3	0	1	0.161369
ENSG00000165983	PTER	0	1	0.161399
ENSG00000135829	DHX9	0	1	0.161403
ENSG00000010278	CD9	0	1	0.161541
ENSG00000105486	LIG1	0	1	0.161605
ENSG00000123064	DDX54	0	1	0.161612
ENSG00000114480	GBE1	0	1	0.161796
ENSG00000124596	OARD1	0	1	0.161796
ENSG00000124731	TREM1	0	1	0.161832
ENSG00000100280	AP1B1	0	1	0.161886
ENSG00000111859	NEDD9	0	1	0.161886
ENSG00000167306	MYO5B	0	1	0.161886
ENSG00000204397	CARD16	0	1	0.161908
ENSG00000071967	CYBRD1	0	1	0.16196
ENSG00000136694	IL36A	0	1	0.161978
ENSG00000174279	EVX2	0	1	0.161978
ENSG00000114268	PFKFB4	0	1	0.162005
ENSG00000232070	TMEM253	0	1	0.162005
ENSG00000166387	PPFIBP2	0	1	0.162013
ENSG00000063176	SPHK2	0	1	0.162153
ENSG00000119760	SUPT7L	0	3	0.162153
ENSG00000204928	GRXCR2	0	1	0.162153
ENSG00000080603	SRCAP	0	1	0.162169
ENSG00000107758	PPP3CB	0	1	0.162194
ENSG00000145990	GFOD1	0	1	0.162194
ENSG00000151611	MMAA	0	1	0.1622
ENSG00000153048	CARHSP1	0	1	0.162235
ENSG00000168959	GRM5	0	1	0.162235
ENSG00000079785	DDX1	0	1	0.16225
ENSG00000138760	SCARB2	0	1	0.162334
ENSG00000111802	TDP2	0	1	0.162358
ENSG00000101307	SIRPB1	0	1	0.162481
ENSG00000105483	CARD8	0	1	0.162623
ENSG00000135119	RNFT2	0	1	0.16271
ENSG00000165637	VDAC2	0	1	0.162816
ENSG00000171766	GATM	0	1	0.162816
ENSG00000141540	TTYH2	0	1	0.162874
ENSG00000152292	SH2D6	0	1	0.162954
ENSG00000173137	ADCK5	0	1	0.162954
ENSG00000110887	DAO	0	1	0.1632
ENSG00000175970	UNC119B	0	1	0.1632
ENSG00000166596	CFAP52	0	1	0.163426
ENSG00000149554	CHEK1	0	1	0.163451
ENSG00000182979	MTA1	0	1	0.163597
ENSG00000061918	GUCY1B1	0	1	0.163603
ENSG00000114544	SLC41A3	0	1	0.163611
ENSG00000170310	STX8	0	1	0.163611
ENSG00000157782	CABP1	0	1	0.163637
ENSG00000112234	FBXL4	0	1	0.163659
ENSG00000136731	UGGT1	0	1	0.163659
ENSG00000100532	CGRRF1	0	1	0.163663
ENSG00000155714	PDZD9	0	1	0.163744
ENSG00000158014	SLC30A2	0	1	0.163752
ENSG00000139220	PPFIA2	0	1	0.163757
ENSG00000143919	CAMKMT	0	1	0.163764
ENSG00000152700	SAR1B	0	1	0.163764
ENSG00000138642	HERC6	0	1	0.163776
ENSG00000177000	MTHFR	0	1	0.163776
ENSG00000118898	PPL	0	1	0.163853
ENSG00000131375	CAPN7	0	1	0.163853
ENSG00000119616	FCF1	0	1	0.163895
ENSG00000147905	ZCCHC7	0	1	0.164073
ENSG00000183067	IGSF5	0	1	0.164073
ENSG00000115556	PLCD4	0	1	0.16409
ENSG00000132911	NMUR2	0	1	0.164098
ENSG00000170242	USP47	0	1	0.164098
ENSG00000079999	KEAP1	0	1	0.164147
ENSG00000117305	HMGCL	0	1	0.164266
ENSG00000110318	CEP126	0	1	0.164266
ENSG00000156030	MIDEAS	0	1	0.164266
ENSG00000135374	ELF5	0	1	0.164312
ENSG00000075073	TACR2	0	1	0.164327
ENSG00000072571	HMMR	0	1	0.164388
ENSG00000100949	RABGGTA	0	1	0.164388
ENSG00000166448	TMEM130	0	1	0.164426
ENSG00000183763	TRAIP	0	1	0.164426
ENSG00000114023	FAM162A	0	1	0.164553
ENSG00000166961	MS4A15	0	1	0.164613
ENSG00000088756	ARHGAP28	0	1	0.164723
ENSG00000105696	TMEM59L	0	1	0.164768
ENSG00000149636	DSN1	0	1	0.164768
ENSG00000164008	C1orf50	0	1	0.164802
ENSG00000132763	MMACHC	0	1	0.164815
ENSG00000047056	WDR37	0	1	0.164875
ENSG00000114656	CFAP92	0	1	0.164875
ENSG00000145808	ADAMTS19	0	1	0.164875
ENSG00000162069	BICDL2	0	1	0.16492
ENSG00000166676	TVP23A	0	1	0.16492
ENSG00000054392	HHAT	0	1	0.164971
ENSG00000115368	WDR75	0	1	0.164984
ENSG00000198574	SH2D1B	0	1	0.164984
ENSG00000168397	ATG4B	0	1	0.164993
ENSG00000174606	ANGEL2	0	1	0.164993
ENSG00000125703	ATG4C	0	1	0.16506
ENSG00000174473	GALNTL6	0	1	0.1651
ENSG00000166881	NEMP1	0	1	0.16514
ENSG00000150637	CD226	0	1	0.165149
ENSG00000015171	ZMYND11	0	1	0.165193
ENSG00000026508	CD44	0	1	0.165249
ENSG00000075945	KIFAP3	0	1	0.165328
ENSG00000167759	KLK13	0	1	0.165328
ENSG00000111907	TPD52L1	0	1	0.165526
ENSG00000204344	STK19	0	1	0.165526
ENSG00000060656	PTPRU	0	1	0.165548
ENSG00000118113	MMP8	0	1	0.165567
ENSG00000141198	TOM1L1	0	1	0.165567
ENSG00000165102	HGSNAT	0	1	0.165567
ENSG00000174132	FAM174A	0	1	0.165567
ENSG00000198887	SMC5	0	1	0.165567
ENSG00000189056	RELN	0	1	0.165585
ENSG00000090054	SPTLC1	0	1	0.16561
ENSG00000176358	TAC4	0	1	0.165749
ENSG00000065154	OAT	0	1	0.165897
ENSG00000123836	PFKFB2	0	1	0.165897
ENSG00000165609	NUDT5	0	1	0.165897
ENSG00000114698	PLSCR4	0	1	0.165922
ENSG00000140368	PSTPIP1	0	1	0.166108
ENSG00000187997	C17orf99	0	1	0.166108
ENSG00000164304	CAGE1	0	1	0.166111
ENSG00000135709	KIAA0513	0	1	0.166196
ENSG00000175535	PNLIP	0	1	0.166197
ENSG00000171453	POLR1C	0	1	0.166309
ENSG00000072310	SREBF1	0	1	0.166327
ENSG00000155313	USP25	0	1	0.166374
ENSG00000174885	NLRP6	0	1	0.166374
ENSG00000115446	UNC50	0	1	0.16652
ENSG00000011132	APBA3	0	1	0.166548
ENSG00000125363	AMELX	0	1	0.166549
ENSG00000102802	MEDAG	0	1	0.166561
ENSG00000008128	CDK11A	0	1	0.166568
ENSG00000188629	ZNF177	0	1	0.16657
ENSG00000102531	FNDC3A	0	1	0.166608
ENSG00000261609	GAN	0	1	0.166608
ENSG00000100344	PNPLA3	0	1	0.166613
ENSG00000152953	STK32B	0	1	0.166722
ENSG00000185090	MANEAL	0	1	0.166788
ENSG00000059915	PSD	0	1	0.167046
ENSG00000073711	PPP2R3A	0	1	0.167359
ENSG00000138744	NAAA	0	1	0.167359
ENSG00000186666	BCDIN3D	0	1	0.167359
ENSG00000184434	LRRC19	0	1	0.167409
ENSG00000185359	HGS	0	1	0.167409
ENSG00000198088	NUP62CL	0	1	0.167409
ENSG00000079950	STX7	0	1	0.167423
ENSG00000132376	INPP5K	0	1	0.167423
ENSG00000139219	COL2A1	0	1	0.167439
ENSG00000000003	TSPAN6	0	1	0.167576
ENSG00000091483	FH	0	1	0.167576
ENSG00000133316	WDR74	0	1	0.167599
ENSG00000162851	TFB2M	0	1	0.167599
ENSG00000108849	PPY	0	1	0.167682
ENSG00000151365	THRSP	0	1	0.167682
ENSG00000156575	PRG3	0	1	0.167682
ENSG00000172967	XKR3	0	1	0.167696
ENSG00000141527	CARD14	0	1	0.167758
ENSG00000172594	SMPDL3A	0	1	0.167807
ENSG00000171105	INSR	0	1	0.167818
ENSG00000173208	ABCD2	0	1	0.167899
ENSG00000120925	RNF170	0	1	0.167911
ENSG00000165118	C9orf64	0	1	0.167911
ENSG00000144802	NFKBIZ	0	1	0.167935
ENSG00000204856	FAM216A	0	1	0.168233
ENSG00000205359	SLCO6A1	0	1	0.16829
ENSG00000130856	ZNF236	0	1	0.168307
ENSG00000162896	PIGR	0	1	0.168307
ENSG00000146425	DYNLT1	0	1	0.168352
ENSG00000007314	SCN4A	0	1	0.168398
ENSG00000176148	TCP11L1	0	1	0.168398
ENSG00000162437	RAVER2	0	1	0.168475
ENSG00000092036	HAUS4	0	2	0.168542
ENSG00000137204	SLC22A7	0	1	0.168593
ENSG00000004700	RECQL	0	1	0.16866
ENSG00000144746	ARL6IP5	0	1	0.16866
ENSG00000161647	MPP3	0	1	0.168913
ENSG00000166086	JAM3	0	1	0.168913
ENSG00000196367	TRRAP	0	1	0.168913
ENSG00000100023	PPIL2	0	1	0.168922
ENSG00000185269	NOTUM	0	1	0.168922
ENSG00000151790	TDO2	0	1	0.16899
ENSG00000008838	MED24	0	1	0.169023
ENSG00000167193	CRK	0	1	0.169114
ENSG00000170412	GPRC5C	0	1	0.169123
ENSG00000141376	BCAS3	0	1	0.169133
ENSG00000176402	GJC3	0	1	0.169133
ENSG00000198822	GRM3	0	1	0.169133
ENSG00000254087	LYN	0	1	0.169133
ENSG00000072778	ACADVL	0	1	0.169166
ENSG00000184507	NUTM1	0	1	0.169166
ENSG00000256294	ZNF225	0	1	0.169166
ENSG00000016864	GLT8D1	0	1	0.169353
ENSG00000151348	EXT2	0	1	0.169353
ENSG00000151835	SACS	0	1	0.169353
ENSG00000198924	DCLRE1A	0	1	0.169517
ENSG00000216588	IGSF23	0	1	0.16952
ENSG00000156802	ATAD2	0	1	0.169538
ENSG00000050730	TNIP3	0	1	0.16954
ENSG00000103855	CD276	0	1	0.16954
ENSG00000164081	TEX264	0	1	0.169547
ENSG00000013288	MAN2B2	0	1	0.169596
ENSG00000013306	SLC25A39	0	1	0.169632
ENSG00000181019	NQO1	0	1	0.169632
ENSG00000159495	TGM7	0	1	0.169638
ENSG00000183840	GPR39	0	1	0.169679
ENSG00000007264	MATK	0	1	0.169788
ENSG00000175779	LINC02694	0	1	0.169788
ENSG00000131351	HAUS8	0	1	0.169936
ENSG00000089486	CDIP1	0	1	0.170019
ENSG00000112981	NME5	0	1	0.170019
ENSG00000121964	GTDC1	0	1	0.170181
ENSG00000163879	DNALI1	0	1	0.170206
ENSG00000167880	EVPL	0	1	0.170206
ENSG00000079387	SENP1	0	1	0.170232
ENSG00000105607	GCDH	0	1	0.170268
ENSG00000143178	TBX19	0	1	0.170268
ENSG00000129657	SEC14L1	0	1	0.170398
ENSG00000167525	PROCA1	0	1	0.17044
ENSG00000175348	TMEM9B	0	1	0.170464
ENSG00000134917	ADAMTS8	0	1	0.170466
ENSG00000198771	RCSD1	0	1	0.170472
ENSG00000131981	LGALS3	0	1	0.170507
ENSG00000146147	MLIP	0	1	0.170507
ENSG00000171574	ZNF584	0	1	0.170514
ENSG00000178935	ZNF552	0	1	0.170514
ENSG00000116701	NCF2	0	1	0.17072
ENSG00000143569	UBAP2L	0	1	0.17072
ENSG00000141736	ERBB2	0	1	0.170768
ENSG00000054611	TBC1D22A	0	1	0.170785
ENSG00000149218	ENDOD1	0	1	0.170785
ENSG00000139579	NABP2	0	1	0.170902
ENSG00000214456	PLIN5	0	1	0.170902
ENSG00000142002	DPP9	0	1	0.170904
ENSG00000178904	DPY19L3	0	1	0.170926
ENSG00000065833	ME1	0	1	0.170963
ENSG00000104059	FAM189A1	0	1	0.170963
ENSG00000118407	FILIP1	0	1	0.170963
ENSG00000182013	PNMA8A	0	1	0.170963
ENSG00000159256	MORC3	0	1	0.171033
ENSG00000206562	METTL6	0	1	0.171033
ENSG00000156711	MAPK13	0	1	0.171073
ENSG00000185015	CA13	0	1	0.171129
ENSG00000111679	PTPN6	0	1	0.171361
ENSG00000161513	FDXR	0	1	0.171481
ENSG00000143499	SMYD2	0	1	0.171485
ENSG00000134962	KLB	0	1	0.171546
ENSG00000157796	WDR19	0	1	0.17164
ENSG00000242550	SERPINB10	0	1	0.17164
ENSG00000119720	NRDE2	0	1	0.171744
ENSG00000205213	LGR4	0	1	0.171781
ENSG00000145198	VWA5B2	0	1	0.171801
ENSG00000187942	LDLRAD2	0	1	0.171801
ENSG00000149968	MMP3	0	1	0.171834
ENSG00000161048	NAPEPLD	0	1	0.171879
ENSG00000165449	SLC16A9	0	1	0.171879
ENSG00000189091	SF3B3	0	1	0.171879
ENSG00000130413	STK33	0	1	0.17192
ENSG00000169641	LUZP1	0	1	0.17192
ENSG00000059758	CDK17	0	1	0.171946
ENSG00000167220	HDHD2	0	1	0.171946
ENSG00000103671	TRIP4	0	1	0.172035
ENSG00000103194	USP10	0	1	0.172067
ENSG00000155189	AGPAT5	0	1	0.172067
ENSG00000152583	SPARCL1	0	1	0.172082
ENSG00000034971	MYOC	0	1	0.172108
ENSG00000166833	NAV2	0	1	0.172108
ENSG00000170178	HOXD12	0	1	0.172114
ENSG00000155970	MICU3	0	1	0.172224
ENSG00000188624	IGFL3	0	1	0.172224
ENSG00000204613	TRIM10	0	1	0.172224
ENSG00000168237	GLYCTK	0	1	0.172245
ENSG00000144554	FANCD2	0	1	0.172264
ENSG00000168803	ADAL	0	1	0.172309
ENSG00000176406	RIMS2	0	1	0.172309
ENSG00000101773	RBBP8	0	1	0.172312
ENSG00000129255	MPDU1	0	1	0.172312
ENSG00000139131	YARS2	0	1	0.172312
ENSG00000035403	VCL	0	1	0.172355
ENSG00000108679	LGALS3BP	0	1	0.172355
ENSG00000239900	ADSL	0	1	0.172355
ENSG00000172031	EPHX4	0	1	0.172436
ENSG00000069943	PIGB	0	1	0.172623
ENSG00000174697	LEP	0	1	0.172784
ENSG00000138095	LRPPRC	0	1	0.172898
ENSG00000120549	KIAA1217	0	1	0.1729
ENSG00000000419	DPM1	0	1	0.172917
ENSG00000196839	ADA	0	1	0.172993
ENSG00000072736	NFATC3	0	1	0.173106
ENSG00000168883	USP39	0	1	0.173106
ENSG00000106686	SPATA6L	0	1	0.17319
ENSG00000107960	STN1	0	1	0.17319
ENSG00000140932	CMTM2	0	1	0.17319
ENSG00000188620	HMX3	0	1	0.17319
ENSG00000121570	DPPA4	0	1	0.173332
ENSG00000254709	IGLL5	0	1	0.173332
ENSG00000082781	ITGB5	0	1	0.173409
ENSG00000070018	LRP6	0	1	0.173422
ENSG00000089050	RBBP9	0	1	0.173472
ENSG00000116176	TPSG1	0	1	0.173539
ENSG00000167613	LAIR1	0	1	0.173539
ENSG00000101082	SLA2	0	1	0.173588
ENSG00000132423	COQ3	0	1	0.173588
ENSG00000053524	MCF2L2	0	1	0.173642
ENSG00000187800	PEAR1	0	1	0.173642
ENSG00000156384	SFR1	0	1	0.173697
ENSG00000124201	ZNFX1	0	1	0.173787
ENSG00000149658	YTHDF1	0	2	0.173787
ENSG00000253159	PCDHGA12	0	1	0.173797
ENSG00000162366	PDZK1IP1	0	1	0.173885
ENSG00000109193	SULT1E1	0	1	0.173912
ENSG00000185873	TMPRSS11B	0	1	0.173912
ENSG00000188674	C2orf80	0	1	0.173993
ENSG00000159921	GNE	0	1	0.174016
ENSG00000131187	F12	0	1	0.174027
ENSG00000100116	GCAT	0	1	0.174055
ENSG00000175356	SCUBE2	0	1	0.174055
ENSG00000082213	C5orf22	0	1	0.174067
ENSG00000107593	PKD2L1	0	1	0.174098
ENSG00000168924	LETM1	0	1	0.174118
ENSG00000214376	VSTM5	0	1	0.174118
ENSG00000148848	ADAM12	0	1	0.174123
ENSG00000068079	IFI35	0	1	0.174142
ENSG00000081870	HSPB11	0	1	0.174392
ENSG00000150510	FAM124A	0	1	0.174495
ENSG00000162402	USP24	0	1	0.174495
ENSG00000169908	TM4SF1	0	1	0.174791
ENSG00000117335	CD46	0	1	0.17484
ENSG00000162430	SELENON	0	1	0.174842
ENSG00000116809	ZBTB17	0	1	0.174975
ENSG00000114026	OGG1	0	1	0.174982
ENSG00000183844	FAM3B	0	1	0.174988
ENSG00000214513	NOTO	0	1	0.174988
ENSG00000127952	STYXL1	0	1	0.175046
ENSG00000144741	SLC25A26	0	1	0.175099
ENSG00000133477	FAM83F	0	1	0.175116
ENSG00000141179	PCTP	0	1	0.175165
ENSG00000049239	H6PD	0	1	0.175225
ENSG00000103023	PRSS54	0	1	0.175225
ENSG00000168040	FADD	0	1	0.175264
ENSG00000113966	ARL6	0	1	0.175322
ENSG00000116918	TSNAX	0	1	0.175322
ENSG00000130005	GAMT	0	1	0.175322
ENSG00000146263	MMS22L	0	1	0.175322
ENSG00000174109	C16orf91	0	1	0.175427
ENSG00000189195	BTBD8	0	1	0.175427
ENSG00000003509	NDUFAF7	0	1	0.175433
ENSG00000122435	TRMT13	0	1	0.175433
ENSG00000108846	ABCC3	0	3	0.175487
ENSG00000169016	E2F6	0	1	0.175574
ENSG00000178127	NDUFV2	0	1	0.175574
ENSG00000182346	DAOA	0	1	0.175595
ENSG00000169490	TM2D2	0	1	0.175617
ENSG00000163312	HELQ	0	1	0.175696
ENSG00000248905	FMN1	0	1	0.175696
ENSG00000090382	LYZ	0	1	0.175733
ENSG00000077454	LRCH4	0	1	0.175793
ENSG00000092010	PSME1	0	1	0.17585
ENSG00000118482	PHF3	0	1	0.17585
ENSG00000175287	PHYHD1	0	1	0.175856
ENSG00000250722	SELENOP	0	1	0.175984
ENSG00000125458	NT5C	0	1	0.175995
ENSG00000165792	METTL17	0	1	0.175995
ENSG00000171234	UGT2B7	0	1	0.175995
ENSG00000171433	GLOD5	0	1	0.175995
ENSG00000038945	MSR1	0	1	0.176052
ENSG00000100325	ASCC2	0	1	0.176055
ENSG00000185621	LMLN	0	1	0.176092
ENSG00000070814	TCOF1	0	2	0.176149
ENSG00000163958	ZDHHC19	0	1	0.176149
ENSG00000124237	C20orf85	0	1	0.176249
ENSG00000196154	S100A4	0	1	0.176249
ENSG00000113924	HGD	0	1	0.176298
ENSG00000134333	LDHA	0	1	0.176298
ENSG00000156831	NSMCE2	0	1	0.17636
ENSG00000106336	FBXO24	0	1	0.17643
ENSG00000158428	CATIP	0	1	0.17643
ENSG00000166224	SGPL1	0	1	0.17643
ENSG00000166507	NDST2	0	1	0.176434
ENSG00000163607	GTPBP8	0	1	0.176441
ENSG00000236320	SLFN14	0	1	0.176441
ENSG00000180921	FAM83H	0	1	0.176511
ENSG00000011009	LYPLA2	0	1	0.176527
ENSG00000175309	PHYKPL	0	1	0.176527
ENSG00000071051	NCK2	0	1	0.176566
ENSG00000113407	TARS1	0	1	0.176566
ENSG00000119777	TMEM214	0	1	0.176566
ENSG00000125831	CST11	0	1	0.176566
ENSG00000146926	ASB10	0	1	0.176566
ENSG00000131368	MRPS25	0	1	0.176596
ENSG00000155592	ZKSCAN2	0	1	0.176596
ENSG00000140043	PTGR2	0	1	0.176607
ENSG00000162971	TYW5	0	1	0.176607
ENSG00000164024	METAP1	0	1	0.176607
ENSG00000137691	CFAP300	0	1	0.176609
ENSG00000104880	ARHGEF18	0	1	0.17667
ENSG00000137936	BCAR3	0	1	0.176672
ENSG00000205143	ARID3C	0	1	0.176705
ENSG00000013016	EHD3	0	1	0.176737
ENSG00000115421	PAPOLG	0	1	0.176759
ENSG00000122378	PRXL2A	0	1	0.176759
ENSG00000172197	MBOAT1	0	1	0.176759
ENSG00000196236	XPNPEP3	0	1	0.176759
ENSG00000013583	HEBP1	0	1	0.176977
ENSG00000131236	CAP1	0	1	0.176977
ENSG00000160867	FGFR4	0	1	0.176977
ENSG00000123983	ACSL3	0	1	0.177005
ENSG00000164494	PDSS2	0	1	0.177005
ENSG00000110011	DNAJC4	0	1	0.177049
ENSG00000139899	CBLN3	0	1	0.177062
ENSG00000107099	DOCK8	0	1	0.177084
ENSG00000165916	PSMC3	0	1	0.177084
ENSG00000179526	SHARPIN	0	1	0.177084
ENSG00000112309	B3GAT2	0	1	0.177128
ENSG00000076356	PLXNA2	0	1	0.177163
ENSG00000174953	DHX36	0	1	0.177185
ENSG00000243989	ACY1	0	1	0.177247
ENSG00000244588	RAD21L1	0	1	0.177247
ENSG00000124490	CRISP2	0	1	0.177323
ENSG00000131386	GALNT15	0	1	0.177414
ENSG00000162461	SLC25A34	0	1	0.177414
ENSG00000095383	TBC1D2	0	2	0.1775
ENSG00000119682	AREL1	0	1	0.177652
ENSG00000148411	NACC2	0	1	0.177652
ENSG00000158516	CPA2	0	1	0.177806
ENSG00000221838	AP4M1	0	1	0.177848
ENSG00000184730	APOBR	0	1	0.177934
ENSG00000144559	TAMM41	0	1	0.177951
ENSG00000197213	ZSCAN5B	0	1	0.178
ENSG00000074966	TXK	0	1	0.178021
ENSG00000111412	SPRING1	0	1	0.178061
ENSG00000135407	AVIL	0	1	0.178061
ENSG00000170962	PDGFD	0	1	0.178061
ENSG00000099308	MAST3	0	1	0.178062
ENSG00000105819	PMPCB	0	1	0.178062
ENSG00000131050	BPIFA2	0	1	0.178064
ENSG00000177192	PUS1	0	1	0.178072
ENSG00000101331	CCM2L	0	1	0.178075
ENSG00000129103	SUMF2	0	1	0.178075
ENSG00000126653	NSRP1	0	1	0.178117
ENSG00000198947	DMD	0	1	0.178117
ENSG00000100987	VSX1	0	1	0.178148
ENSG00000170577	SIX2	0	1	0.178154
ENSG00000174776	WDR49	0	1	0.178154
ENSG00000072786	STK10	0	1	0.178264
ENSG00000169756	LIMS1	0	1	0.178274
ENSG00000074527	NTN4	0	1	0.178349
ENSG00000176102	CSTF3	0	1	0.178349
ENSG00000121211	MND1	0	1	0.17837
ENSG00000147669	POLR2K	0	1	0.17837
ENSG00000132692	BCAN	0	2	0.178504
ENSG00000091583	APOH	0	1	0.178561
ENSG00000154143	PANX3	0	1	0.178576
ENSG00000109790	KLHL5	0	1	0.178613
ENSG00000047579	DTNBP1	0	1	0.178628
ENSG00000060339	CCAR1	0	1	0.178658
ENSG00000086288	NME8	0	1	0.178658
ENSG00000136040	PLXNC1	0	1	0.178767
ENSG00000123130	ACOT9	0	1	0.178838
ENSG00000172578	KLHL6	0	1	0.178852
ENSG00000176894	PXMP2	0	1	0.178957
ENSG00000204540	PSORS1C1	0	1	0.179066
ENSG00000172878	METAP1D	0	1	0.179075
ENSG00000134602	STK26	0	1	0.179094
ENSG00000139988	RDH12	0	1	0.179138
ENSG00000074416	MGLL	0	1	0.179181
ENSG00000149257	SERPINH1	0	1	0.179429
ENSG00000100644	HIF1A	0	1	0.179479
ENSG00000159147	DONSON	0	1	0.179479
ENSG00000162763	LRRC52	0	1	0.179492
ENSG00000119125	GDA	0	1	0.179512
ENSG00000175110	MRPS22	0	1	0.179512
ENSG00000106012	IQCE	0	1	0.179602
ENSG00000163631	ALB	0	1	0.179664
ENSG00000175449	RFESD	0	1	0.179664
ENSG00000150750	C11orf53	0	1	0.179676
ENSG00000182938	OTOP3	0	1	0.179676
ENSG00000076513	ANKRD13A	0	1	0.179792
ENSG00000101400	SNTA1	0	1	0.179807
ENSG00000149480	MTA2	0	1	0.179807
ENSG00000169696	ASPSCR1	0	1	0.179813
ENSG00000197043	ANXA6	0	1	0.179813
ENSG00000084072	PPIE	0	1	0.179874
ENSG00000076944	STXBP2	0	1	0.179882
ENSG00000132254	ARFIP2	0	1	0.179882
ENSG00000137634	NXPE4	0	1	0.179882
ENSG00000172421	EFCAB3	0	1	0.179914
ENSG00000126814	TRMT5	0	1	0.179931
ENSG00000149016	TUT1	0	1	0.179931
ENSG00000111816	FRK	0	2	0.179937
ENSG00000137252	HCRTR2	0	1	0.179949
ENSG00000078053	AMPH	0	1	0.180052
ENSG00000148773	MKI67	0	1	0.180156
ENSG00000159079	CFAP298	0	3	0.180215
ENSG00000198911	SREBF2	0	1	0.180217
ENSG00000125319	HROB	0	1	0.18028
ENSG00000124767	GLO1	0	1	0.180372
ENSG00000087116	ADAMTS2	0	1	0.180438
ENSG00000157593	SLC35B2	0	1	0.180438
ENSG00000168484	SFTPC	0	1	0.180538
ENSG00000134470	IL15RA	0	1	0.180609
ENSG00000120896	SORBS3	0	2	0.18079
ENSG00000131730	CKMT2	0	1	0.1808
ENSG00000109736	MFSD10	0	1	0.180851
ENSG00000127980	PEX1	0	1	0.180851
ENSG00000134874	DZIP1	0	4	0.180881
ENSG00000133069	TMCC2	0	1	0.18107
ENSG00000071189	SNX13	0	1	0.181148
ENSG00000175426	PCSK1	0	1	0.181162
ENSG00000072163	LIMS2	0	1	0.181215
ENSG00000183891	TTC32	0	1	0.181215
ENSG00000104055	TGM5	0	1	0.181293
ENSG00000162897	FCAMR	0	1	0.181293
ENSG00000166734	GOLM2	0	1	0.181351
ENSG00000160183	TMPRSS3	0	1	0.181361
ENSG00000165105	RASEF	0	1	0.181369
ENSG00000130876	SLC7A10	0	1	0.181511
ENSG00000168404	MLKL	0	1	0.181579
ENSG00000010610	CD4	0	1	0.181744
ENSG00000135372	NAT10	0	1	0.181744
ENSG00000160221	GATD3A	0	1	0.181792
ENSG00000104147	OIP5	0	1	0.181879
ENSG00000134375	TIMM17A	0	1	0.181883
ENSG00000149743	TRPT1	0	1	0.181889
ENSG00000166133	RPUSD2	0	1	0.181898
ENSG00000127324	TSPAN8	0	1	0.181904
ENSG00000130638	ATXN10	0	1	0.181904
ENSG00000074964	ARHGEF10L	0	1	0.181959
ENSG00000140600	SH3GL3	0	1	0.181959
ENSG00000150471	ADGRL3	0	1	0.181959
ENSG00000146197	SCUBE3	0	1	0.182121
ENSG00000163281	GNPDA2	0	1	0.182121
ENSG00000164615	CAMLG	0	2	0.182158
ENSG00000160179	ABCG1	0	1	0.182178
ENSG00000075884	ARHGAP15	0	1	0.182263
ENSG00000164744	SUN3	0	1	0.182263
ENSG00000066379	POLR1H	0	1	0.182444
ENSG00000108666	C17orf75	0	1	0.182444
ENSG00000085382	HACE1	0	1	0.182526
ENSG00000159263	SIM2	0	1	0.182526
ENSG00000035687	ADSS2	0	1	0.182582
ENSG00000196576	PLXNB2	0	1	0.182582
ENSG00000160973	FOXH1	0	1	0.182628
ENSG00000117525	F3	0	1	0.182704
ENSG00000157191	NECAP2	0	1	0.182704
ENSG00000167173	C15orf39	0	1	0.182704
ENSG00000080007	DDX43	0	1	0.182756
ENSG00000156140	ADAMTS3	0	1	0.182772
ENSG00000120708	TGFBI	0	2	0.183082
ENSG00000137843	PAK6	0	1	0.183107
ENSG00000163950	SLBP	0	1	0.18318
ENSG00000125485	DDX31	0	1	0.183226
ENSG00000145740	SLC30A5	0	1	0.183226
ENSG00000172795	DCP2	0	1	0.183226
ENSG00000185658	BRWD1	0	1	0.183226
ENSG00000001036	FUCA2	0	2	0.183299
ENSG00000162571	TTLL10	0	1	0.183321
ENSG00000126883	NUP214	0	1	0.183378
ENSG00000155052	CNTNAP5	0	1	0.183406
ENSG00000162636	FAM102B	0	1	0.183406
ENSG00000267796	LIN37	0	1	0.183423
ENSG00000141101	NOB1	0	1	0.183431
ENSG00000162641	AKNAD1	0	1	0.183431
ENSG00000120054	CPN1	0	1	0.18348
ENSG00000169288	MRPL1	0	1	0.18348
ENSG00000165084	C8orf34	0	1	0.183503
ENSG00000147485	PXDNL	0	1	0.183504
ENSG00000187231	SESTD1	0	2	0.183578
ENSG00000143801	PSEN2	0	1	0.183599
ENSG00000173163	COMMD1	0	1	0.183599
ENSG00000127603	MACF1	0	1	0.183689
ENSG00000025800	KPNA6	0	1	0.183703
ENSG00000038210	PI4K2B	0	1	0.183703
ENSG00000099139	PCSK5	0	1	0.183703
ENSG00000183530	PRR14L	0	1	0.183703
ENSG00000157617	C2CD2	0	1	0.183713
ENSG00000102096	PIM2	0	1	0.18373
ENSG00000104415	CCN4	0	1	0.18374
ENSG00000141052	MYOCD	0	1	0.183791
ENSG00000007255	TRAPPC6A	0	2	0.183834
ENSG00000163394	CCKAR	0	1	0.183851
ENSG00000180318	ALX1	0	1	0.183851
ENSG00000158865	SLC5A11	0	1	0.183915
ENSG00000125084	WNT1	0	1	0.183938
ENSG00000162616	DNAJB4	0	1	0.183938
ENSG00000156587	UBE2L6	0	1	0.183942
ENSG00000187824	TMEM220	0	1	0.183942
ENSG00000105223	PLD3	0	1	0.18405
ENSG00000109861	CTSC	0	1	0.18405
ENSG00000139197	PEX5	0	1	0.184055
ENSG00000213424	KRT222	0	1	0.184055
ENSG00000101222	SPEF1	0	1	0.184072
ENSG00000167468	GPX4	0	1	0.184072
ENSG00000087460	GNAS	0	1	0.184086
ENSG00000178804	H1-8	0	1	0.184086
ENSG00000117153	KLHL12	0	1	0.184271
ENSG00000178177	LCORL	0	1	0.184271
ENSG00000112494	UNC93A	0	1	0.184353
ENSG00000135835	KIAA1614	0	1	0.184353
ENSG00000130270	ATP8B3	0	2	0.184372
ENSG00000132842	AP3B1	0	1	0.184537
ENSG00000173588	CEP83	0	1	0.184607
ENSG00000081692	JMJD4	0	1	0.184608
ENSG00000137055	PLAA	0	1	0.184616
ENSG00000197903	H2BC12	0	1	0.184616
ENSG00000136872	ALDOB	0	1	0.18465
ENSG00000164692	COL1A2	0	1	0.18465
ENSG00000182158	CREB3L2	0	1	0.184733
ENSG00000104341	LAPTM4B	0	1	0.184851
ENSG00000160593	JAML	0	1	0.184974
ENSG00000172725	CORO1B	0	1	0.184974
ENSG00000005448	WDR54	0	1	0.185004
ENSG00000117475	BLZF1	0	1	0.185039
ENSG00000172955	ADH6	0	1	0.185039
ENSG00000145384	FABP2	0	1	0.185047
ENSG00000164930	FZD6	0	1	0.185047
ENSG00000168487	BMP1	0	1	0.185047
ENSG00000112276	BVES	0	1	0.185081
ENSG00000163126	ANKRD23	0	1	0.185113
ENSG00000187678	SPRY4	0	1	0.185214
ENSG00000119328	ABITRAM	0	1	0.185275
ENSG00000120451	SNX19	0	1	0.185295
ENSG00000083168	KAT6A	0	1	0.185316
ENSG00000159527	PGLYRP3	0	1	0.185316
ENSG00000071894	CPSF1	0	1	0.185354
ENSG00000094804	CDC6	0	1	0.185354
ENSG00000103495	MAZ	0	1	0.185354
ENSG00000105639	JAK3	0	1	0.185355
ENSG00000144426	NBEAL1	0	1	0.185355
ENSG00000168515	SCGB1D1	0	1	0.185392
ENSG00000005156	LIG3	0	1	0.185403
ENSG00000039123	MTREX	0	1	0.185403
ENSG00000147481	SNTG1	0	1	0.185522
ENSG00000104267	CA2	0	1	0.185535
ENSG00000119906	SLF2	0	1	0.185541
ENSG00000163412	EIF4E3	0	1	0.185541
ENSG00000157445	CACNA2D3	0	1	0.185639
ENSG00000081051	AFP	0	1	0.185717
ENSG00000161533	ACOX1	0	1	0.185717
ENSG00000111364	DDX55	0	1	0.185768
ENSG00000121957	GPSM2	0	1	0.185771
ENSG00000127081	ZNF484	0	1	0.185771
ENSG00000138162	TACC2	0	1	0.185771
ENSG00000165458	INPPL1	0	1	0.185771
ENSG00000101104	PABPC1L	0	2	0.185781
ENSG00000182141	ZNF708	0	1	0.185819
ENSG00000183401	CCDC159	0	1	0.185851
ENSG00000158828	PINK1	0	1	0.185969
ENSG00000136878	USP20	0	1	0.185971
ENSG00000089250	NOS1	0	1	0.185985
ENSG00000168542	COL3A1	0	1	0.185985
ENSG00000109180	OCIAD1	0	1	0.18599
ENSG00000176715	ACSF3	0	1	0.18599
ENSG00000179776	CDH5	0	1	0.18599
ENSG00000101276	SLC52A3	0	1	0.186001
ENSG00000013375	PGM3	0	1	0.186207
ENSG00000198865	CCDC152	0	1	0.186229
ENSG00000162377	COA7	0	1	0.186232
ENSG00000105671	DDX49	0	1	0.186355
ENSG00000149922	TBX6	0	1	0.186378
ENSG00000109685	NSD2	0	1	0.186409
ENSG00000131473	ACLY	0	1	0.186496
ENSG00000113790	EHHADH	0	1	0.186542
ENSG00000100104	SRRD	0	1	0.186619
ENSG00000117115	PADI2	0	1	0.186619
ENSG00000123838	C4BPA	0	1	0.186643
ENSG00000160949	TONSL	0	2	0.186655
ENSG00000096093	EFHC1	0	1	0.186658
ENSG00000065427	KARS1	0	1	0.186757
ENSG00000197969	VPS13A	0	1	0.186767
ENSG00000026652	AGPAT4	0	1	0.186844
ENSG00000128059	PPAT	0	1	0.186872
ENSG00000141576	RNF157	0	1	0.186872
ENSG00000160345	C9orf116	0	1	0.186872
ENSG00000151388	ADAMTS12	0	2	0.186912
ENSG00000164512	ANKRD55	0	1	0.187007
ENSG00000185739	SRL	0	1	0.187007
ENSG00000157303	SUSD3	0	1	0.187038
ENSG00000174938	SEZ6L2	0	1	0.187038
ENSG00000171962	DRC3	0	3	0.187051
ENSG00000104524	PYCR3	0	1	0.187093
ENSG00000129535	NRL	0	1	0.187093
ENSG00000158714	SLAMF8	0	1	0.187093
ENSG00000176438	SYNE3	0	1	0.187093
ENSG00000162458	FBLIM1	0	1	0.187094
ENSG00000012124	CD22	0	1	0.18715
ENSG00000156256	USP16	0	1	0.187157
ENSG00000255561	FDXACB1	0	1	0.187157
ENSG00000184209	SNRNP35	0	1	0.187249
ENSG00000155906	RMND1	0	1	0.187249
ENSG00000244754	N4BP2L2	0	1	0.187249
ENSG00000262576	PCDHGA4	0	1	0.187249
ENSG00000043143	JADE2	0	1	0.187265
ENSG00000138735	PDE5A	0	1	0.187265
ENSG00000185610	DBX2	0	1	0.18736
ENSG00000125966	MMP24	0	1	0.187371
ENSG00000198522	GPN1	0	1	0.187371
ENSG00000002016	RAD52	0	1	0.187389
ENSG00000070610	GBA2	0	1	0.187402
ENSG00000163541	SUCLG1	0	1	0.18745
ENSG00000169598	DFFB	0	1	0.187544
ENSG00000025423	HSD17B6	0	1	0.187551
ENSG00000032219	ARID4A	0	1	0.187556
ENSG00000167695	TLCD3A	0	1	0.187601
ENSG00000171148	TADA3	0	1	0.187601
ENSG00000106638	TBL2	0	1	0.187633
ENSG00000108946	PRKAR1A	0	1	0.187675
ENSG00000152952	PLOD2	0	1	0.187693
ENSG00000178385	PLEKHM3	0	1	0.187693
ENSG00000179222	MAGED1	0	1	0.187693
ENSG00000151690	MFSD6	0	1	0.187721
ENSG00000167186	COQ7	0	1	0.187721
ENSG00000060566	CREB3L3	0	1	0.187862
ENSG00000141428	C18orf21	0	1	0.187862
ENSG00000184985	SORCS2	0	1	0.187871
ENSG00000100897	DCAF11	0	1	0.18801
ENSG00000167315	ACAA2	0	1	0.18801
ENSG00000258223	PRSS58	0	2	0.188205
ENSG00000111880	RNGTT	0	1	0.188249
ENSG00000140299	BNIP2	0	1	0.188249
ENSG00000136819	C9orf78	0	1	0.188316
ENSG00000174842	GLMN	0	1	0.188316
ENSG00000185482	STAC3	0	2	0.188348
ENSG00000138798	EGF	0	1	0.188363
ENSG00000144893	MED12L	0	1	0.188363
ENSG00000107077	KDM4C	0	1	0.188438
ENSG00000122966	CIT	0	1	0.188438
ENSG00000126216	TUBGCP3	0	1	0.188438
ENSG00000172478	MAB21L4	0	1	0.188438
ENSG00000132359	RAP1GAP2	0	2	0.188445
ENSG00000130595	TNNT3	0	1	0.18846
ENSG00000158104	HPD	0	2	0.188555
ENSG00000175764	TTLL11	0	1	0.188586
ENSG00000187689	AMTN	0	1	0.188586
ENSG00000138075	ABCG5	0	1	0.188601
ENSG00000166510	CCDC68	0	1	0.188601
ENSG00000013561	RNF14	0	1	0.188602
ENSG00000142233	NTN5	0	1	0.188602
ENSG00000157087	ATP2B2	0	1	0.188602
ENSG00000111245	MYL2	0	1	0.188668
ENSG00000070778	PTPN21	0	2	0.188686
ENSG00000161526	SAP30BP	0	1	0.188832
ENSG00000136271	DDX56	0	1	0.18886
ENSG00000159723	AGRP	0	1	0.188946
ENSG00000186792	HYAL3	0	1	0.188946
ENSG00000106344	RBM28	0	1	0.189103
ENSG00000118873	RAB3GAP2	0	1	0.189237
ENSG00000124194	GDAP1L1	0	1	0.189266
ENSG00000177380	PPFIA3	0	1	0.189266
ENSG00000145708	CRHBP	0	1	0.189278
ENSG00000006283	CACNA1G	0	1	0.189343
ENSG00000085377	PREP	0	1	0.189343
ENSG00000103657	HERC1	0	1	0.189343
ENSG00000144824	PHLDB2	0	1	0.189397
ENSG00000213889	PPM1N	0	1	0.189442
ENSG00000102970	CCL17	0	1	0.189475
ENSG00000160746	ANO10	0	1	0.189475
ENSG00000078549	ADCYAP1R1	0	1	0.189553
ENSG00000060642	PIGV	0	1	0.189619
ENSG00000090924	PLEKHG2	0	1	0.189619
ENSG00000124233	SEMG1	0	1	0.189655
ENSG00000134193	REG4	0	1	0.189655
ENSG00000117154	IGSF21	0	1	0.189689
ENSG00000136807	CDK9	0	1	0.189689
ENSG00000187260	WDR86	0	1	0.189689
ENSG00000005844	ITGAL	0	1	0.18973
ENSG00000103034	NDRG4	0	1	0.18973
ENSG00000135917	SLC19A3	0	1	0.189809
ENSG00000155875	SAXO1	0	1	0.189873
ENSG00000090316	MAEA	0	1	0.189898
ENSG00000179562	GCC1	0	1	0.189916
ENSG00000039560	RAI14	0	1	0.189939
ENSG00000145103	ILDR1	0	1	0.190177
ENSG00000146918	NCAPG2	0	1	0.190177
ENSG00000185049	NELFA	0	1	0.190177
ENSG00000182557	SPNS3	0	1	0.190203
ENSG00000160181	TFF2	0	1	0.190282
ENSG00000088320	REM1	0	1	0.190315
ENSG00000138772	ANXA3	0	1	0.190315
ENSG00000006059	KRT33A	0	1	0.190465
ENSG00000110080	ST3GAL4	0	1	0.190465
ENSG00000168904	LRRC28	0	1	0.190465
ENSG00000161180	CCDC116	0	1	0.190649
ENSG00000174226	SNX31	0	1	0.190649
ENSG00000037280	FLT4	0	1	0.19067
ENSG00000167578	RAB4B	0	1	0.190803
ENSG00000047932	GOPC	0	1	0.190992
ENSG00000196220	SRGAP3	0	1	0.190992
ENSG00000111052	LIN7A	0	1	0.191019
ENSG00000147459	DOCK5	0	1	0.191121
ENSG00000151665	PIGF	0	1	0.191121
ENSG00000163071	SPATA18	0	1	0.191121
ENSG00000253953	PCDHGB4	0	1	0.191156
ENSG00000055332	EIF2AK2	0	1	0.19116
ENSG00000161653	NAGS	0	1	0.19116
ENSG00000175294	CATSPER1	0	1	0.191207
ENSG00000203837	PNLIPRP3	0	2	0.191219
ENSG00000172456	FGGY	0	1	0.191261
ENSG00000131504	DIAPH1	0	1	0.191272
ENSG00000142910	TINAGL1	0	1	0.191272
ENSG00000008282	SYPL1	0	1	0.191287
ENSG00000101181	MTG2	0	1	0.191303
ENSG00000171431	KRT20	0	1	0.191303
ENSG00000126858	RHOT1	0	1	0.191339
ENSG00000171189	GRIK1	0	1	0.191339
ENSG00000106258	CYP3A5	0	1	0.191342
ENSG00000179915	NRXN1	0	1	0.191371
ENSG00000198837	DENND4B	0	1	0.191419
ENSG00000119688	ABCD4	0	1	0.191431
ENSG00000156127	BATF	0	1	0.191431
ENSG00000183048	SLC25A10	0	1	0.191617
ENSG00000134245	WNT2B	0	1	0.191636
ENSG00000104983	CCDC61	0	1	0.191672
ENSG00000186047	DLEU7	0	1	0.191672
ENSG00000180113	TDRD6	1	12	0.191802
ENSG00000087077	TRIP6	0	1	0.191811
ENSG00000108375	RNF43	0	1	0.191811
ENSG00000163138	PACRGL	0	1	0.191811
ENSG00000179299	NSUN7	0	1	0.191863
ENSG00000105821	DNAJC2	0	1	0.191885
ENSG00000110436	SLC1A2	0	1	0.191885
ENSG00000065325	GLP2R	0	1	0.191891
ENSG00000151640	DPYSL4	0	1	0.191891
ENSG00000109113	RAB34	0	1	0.191929
ENSG00000135916	ITM2C	0	1	0.191942
ENSG00000075292	ZNF638	0	1	0.191951
ENSG00000186710	CFAP73	0	1	0.191951
ENSG00000146285	SCML4	0	1	0.191995
ENSG00000166569	CPLX4	0	1	0.191995
ENSG00000102967	DHODH	0	2	0.19203
ENSG00000146373	RNF217	0	1	0.192102
ENSG00000165819	METTL3	0	1	0.192102
ENSG00000138594	TMOD3	0	1	0.192138
ENSG00000168137	SETD5	0	1	0.192138
ENSG00000110025	SNX15	0	1	0.192155
ENSG00000118855	MFSD1	0	1	0.192155
ENSG00000140474	ULK3	0	1	0.192235
ENSG00000095951	HIVEP1	0	2	0.192251
ENSG00000149403	GRIK4	0	1	0.192282
ENSG00000105467	SYNGR4	0	1	0.1923
ENSG00000122203	KIAA1191	0	1	0.1923
ENSG00000159588	CCDC17	0	1	0.1923
ENSG00000198736	MSRB1	0	1	0.192453
ENSG00000143891	GALM	0	1	0.192475
ENSG00000151576	QTRT2	0	1	0.192475
ENSG00000213064	SFT2D2	0	1	0.192475
ENSG00000134072	CAMK1	0	1	0.19252
ENSG00000138380	CARF	0	1	0.19252
ENSG00000122870	BICC1	0	1	0.192587
ENSG00000157450	RNF111	0	1	0.192587
ENSG00000131969	ABHD12B	0	1	0.192764
ENSG00000166558	SLC38A8	0	1	0.192852
ENSG00000139546	TARBP2	0	1	0.193014
ENSG00000151116	UEVLD	0	1	0.193014
ENSG00000171931	FBXW10	0	1	0.193014
ENSG00000178295	GEN1	0	1	0.193014
ENSG00000065618	COL17A1	0	1	0.193056
ENSG00000165752	STK32C	0	1	0.193056
ENSG00000130701	RBBP8NL	0	1	0.193112
ENSG00000136159	NUDT15	0	1	0.193112
ENSG00000113812	ACTR8	0	1	0.193138
ENSG00000080511	RDH8	0	1	0.193142
ENSG00000169764	UGP2	0	1	0.193142
ENSG00000088854	C20orf194	0	1	0.193146
ENSG00000138459	SLC35A5	0	1	0.19323
ENSG00000148297	MED22	0	1	0.19323
ENSG00000157911	PEX10	0	1	0.19323
ENSG00000125384	PTGER2	0	1	0.193321
ENSG00000168453	HR	0	1	0.193321
ENSG00000248487	ABHD14A	0	1	0.193341
ENSG00000156299	TIAM1	0	1	0.193367
ENSG00000137142	IGFBPL1	0	1	0.193386
ENSG00000110104	CCDC86	0	1	0.193401
ENSG00000170776	AKAP13	0	1	0.19349
ENSG00000109511	ANXA10	0	1	0.193586
ENSG00000137561	TTPA	0	1	0.19365
ENSG00000124780	KCNK17	0	1	0.193652
ENSG00000187806	TMEM202	0	1	0.193688
ENSG00000103599	IQCH	0	1	0.193759
ENSG00000197024	ZNF398	0	1	0.193759
ENSG00000136918	WDR38	0	1	0.193807
ENSG00000188305	PEAK3	0	1	0.193807
ENSG00000256463	SALL3	0	1	0.193807
ENSG00000038532	CLEC16A	0	2	0.19384
ENSG00000185634	SHC4	0	2	0.19384
ENSG00000144843	ADPRH	0	1	0.19385
ENSG00000174227	PIGG	0	1	0.19385
ENSG00000136870	ZNF189	0	1	0.193871
ENSG00000173273	TNKS	0	1	0.193871
ENSG00000002919	SNX11	0	1	0.193905
ENSG00000064102	INTS13	0	1	0.193905
ENSG00000182447	OTOL1	0	1	0.193905
ENSG00000112877	CEP72	0	1	0.193911
ENSG00000008294	SPAG9	0	1	0.193953
ENSG00000063241	ISOC2	0	2	0.193953
ENSG00000147231	RADX	0	1	0.193953
ENSG00000197905	TEAD4	0	1	0.193953
ENSG00000174429	ABRA	0	2	0.194019
ENSG00000090615	GOLGA3	0	1	0.194069
ENSG00000140374	ETFA	0	1	0.194069
ENSG00000164983	TMEM65	0	1	0.19411
ENSG00000039319	ZFYVE16	0	1	0.194129
ENSG00000198917	SPOUT1	0	1	0.194129
ENSG00000161798	AQP5	0	1	0.194156
ENSG00000112299	VNN1	0	1	0.194157
ENSG00000147465	STAR	0	1	0.194222
ENSG00000034693	PEX3	0	1	0.194242
ENSG00000171163	ZNF692	0	1	0.194242
ENSG00000171914	TLN2	0	1	0.194339
ENSG00000124491	F13A1	0	2	0.194355
ENSG00000183087	GAS6	0	1	0.194449
ENSG00000183638	RP1L1	0	1	0.194449
ENSG00000186185	KIF18B	0	2	0.194515
ENSG00000049540	ELN	0	1	0.194516
ENSG00000130755	GMFG	0	1	0.194516
ENSG00000164715	LMTK2	0	1	0.194563
ENSG00000174808	BTC	0	1	0.194565
ENSG00000136631	VPS45	0	1	0.194595
ENSG00000143553	SNAPIN	0	2	0.194595
ENSG00000224586	GPX5	0	1	0.194709
ENSG00000169592	INO80E	0	1	0.19477
ENSG00000111581	NUP107	0	1	0.194803
ENSG00000160818	GPATCH4	0	1	0.194803
ENSG00000151914	DST	0	3	0.194893
ENSG00000101439	CST3	0	1	0.194964
ENSG00000109576	AADAT	0	1	0.194964
ENSG00000140527	WDR93	0	2	0.194964
ENSG00000146416	AIG1	0	1	0.194964
ENSG00000150656	CNDP1	0	1	0.194966
ENSG00000137497	NUMA1	0	1	0.19498
ENSG00000168143	FAM83B	0	1	0.19498
ENSG00000168685	IL7R	0	1	0.19498
ENSG00000179008	C14orf39	0	1	0.195005
ENSG00000103199	ZNF500	0	1	0.195091
ENSG00000111142	METAP2	0	1	0.195131
ENSG00000132406	TMEM128	0	1	0.195131
ENSG00000204001	LCN8	0	1	0.195131
ENSG00000197013	ZNF429	0	1	0.195172
ENSG00000105251	SHD	0	1	0.195176
ENSG00000177685	CRACR2B	0	1	0.195176
ENSG00000144410	CPO	0	1	0.195199
ENSG00000162063	CCNF	0	1	0.195199
ENSG00000058453	CROCC	0	2	0.195401
ENSG00000123200	ZC3H13	0	1	0.195527
ENSG00000091129	NRCAM	0	1	0.195569
ENSG00000141469	SLC14A1	0	1	0.195569
ENSG00000101224	CDC25B	0	1	0.195706
ENSG00000197140	ADAM32	0	1	0.195706
ENSG00000100485	SOS2	0	1	0.19575
ENSG00000119725	ZNF410	0	1	0.19575
ENSG00000168813	ZNF507	0	1	0.19575
ENSG00000135587	SMPD2	0	1	0.195781
ENSG00000079385	CEACAM1	0	1	0.195787
ENSG00000116406	EDEM3	0	1	0.195787
ENSG00000145088	EAF2	0	1	0.195787
ENSG00000162813	BPNT1	0	1	0.195787
ENSG00000166965	RCCD1	0	1	0.195787
ENSG00000188883	KLRG2	0	1	0.195787
ENSG00000152256	PDK1	0	1	0.196061
ENSG00000178031	ADAMTSL1	0	1	0.196061
ENSG00000006712	PAF1	0	1	0.196127
ENSG00000113569	NUP155	0	1	0.196127
ENSG00000117009	KMO	0	1	0.196127
ENSG00000170322	NFRKB	0	1	0.196127
ENSG00000196663	TECPR2	0	2	0.196127
ENSG00000141255	SPATA22	0	1	0.196154
ENSG00000167797	CDK2AP2	0	1	0.196154
ENSG00000152527	PLEKHH2	0	1	0.196277
ENSG00000074755	ZZEF1	0	1	0.196314
ENSG00000158286	RNF207	0	1	0.196314
ENSG00000189067	LITAF	0	1	0.196314
ENSG00000135063	FAM189A2	0	1	0.196361
ENSG00000169018	FEM1B	0	1	0.196361
ENSG00000178690	DYNAP	0	1	0.196381
ENSG00000099849	RASSF7	0	1	0.196444
ENSG00000122359	ANXA11	0	1	0.196448
ENSG00000091664	SLC17A6	0	1	0.196525
ENSG00000163491	NEK10	0	1	0.196525
ENSG00000083290	ULK2	0	1	0.196585
ENSG00000172508	CARNS1	0	1	0.196612
ENSG00000070718	AP3M2	0	1	0.196633
ENSG00000197768	STPG3	0	1	0.196633
ENSG00000128815	WDFY4	0	1	0.19667
ENSG00000106113	CRHR2	0	1	0.196682
ENSG00000156931	VPS8	0	1	0.196682
ENSG00000180287	PLD5	0	1	0.196711
ENSG00000198000	NOL8	0	1	0.196711
ENSG00000186090	HTR3D	0	1	0.196778
ENSG00000140471	LINS1	0	1	0.196822
ENSG00000189362	NEMP2	0	1	0.196822
ENSG00000206384	COL6A6	1	13	0.196834
ENSG00000069493	CLEC2D	0	1	0.196855
ENSG00000114626	ABTB1	0	2	0.196872
ENSG00000101343	CRNKL1	0	1	0.19689
ENSG00000143498	TAF1A	0	1	0.19689
ENSG00000184599	TAFA3	0	1	0.19689
ENSG00000160856	FCRL3	0	1	0.196985
ENSG00000135074	ADAM19	0	1	0.19703
ENSG00000197965	MPZL1	0	2	0.19703
ENSG00000086061	DNAJA1	0	1	0.197065
ENSG00000129170	CSRP3	0	1	0.197073
ENSG00000139155	SLCO1C1	0	2	0.197076
ENSG00000205022	PABPN1L	0	1	0.19708
ENSG00000196141	SPATS2L	0	1	0.197089
ENSG00000025708	TYMP	0	1	0.197091
ENSG00000077498	TYR	0	1	0.197091
ENSG00000166845	C18orf54	0	1	0.197091
ENSG00000197753	LHFPL5	0	1	0.197091
ENSG00000004838	ZMYND10	0	1	0.197091
ENSG00000197943	PLCG2	0	2	0.197141
ENSG00000174652	ZNF266	0	1	0.197153
ENSG00000146858	ZC3HAV1L	0	1	0.19717
ENSG00000136167	LCP1	0	1	0.197233
ENSG00000076650	GPATCH1	0	2	0.197249
ENSG00000168826	ZBTB49	0	1	0.197309
ENSG00000165813	CCDC186	0	1	0.197314
ENSG00000134215	VAV3	0	1	0.197314
ENSG00000064932	SBNO2	0	1	0.197347
ENSG00000158525	CPA5	0	1	0.197582
ENSG00000085274	MYNN	0	1	0.197654
ENSG00000132386	SERPINF1	0	1	0.197654
ENSG00000163374	YY1AP1	0	1	0.197654
ENSG00000119698	PPP4R4	0	1	0.19766
ENSG00000167754	KLK5	0	1	0.19766
ENSG00000105738	SIPA1L3	0	1	0.197675
ENSG00000136160	EDNRB	0	1	0.197696
ENSG00000064601	CTSA	0	1	0.197741
ENSG00000163377	TAFA4	0	1	0.197961
ENSG00000169733	RFNG	0	1	0.197997
ENSG00000106397	PLOD3	0	2	0.198121
ENSG00000204560	DHX16	0	1	0.198252
ENSG00000129515	SNX6	0	1	0.198369
ENSG00000138613	APH1B	0	1	0.198386
ENSG00000159496	RGL4	0	1	0.198409
ENSG00000165233	CARD19	0	1	0.198409
ENSG00000134982	APC	0	2	0.198413
ENSG00000166311	SMPD1	0	1	0.198433
ENSG00000179761	PIPOX	0	1	0.198433
ENSG00000054523	KIF1B	0	1	0.198454
ENSG00000137273	FOXF2	0	1	0.198467
ENSG00000167968	DNASE1L2	0	1	0.198509
ENSG00000115361	ACADL	0	1	0.198537
ENSG00000134802	SLC43A3	0	1	0.198537
ENSG00000147256	ARHGAP36	0	1	0.198537
ENSG00000036828	CASR	0	1	0.19867
ENSG00000149243	KLHL35	0	1	0.19867
ENSG00000007908	SELE	0	1	0.198698
ENSG00000128713	HOXD11	0	1	0.198698
ENSG00000139610	CELA1	0	4	0.198759
ENSG00000096006	CRISP3	0	1	0.198814
ENSG00000121552	CSTA	0	1	0.198951
ENSG00000065534	MYLK	0	1	0.198964
ENSG00000108688	CCL7	0	1	0.198964
ENSG00000149231	CCDC82	0	1	0.199005
ENSG00000023516	AKAP11	0	1	0.199172
ENSG00000059122	FLYWCH1	0	1	0.199172
ENSG00000181790	ADGRB1	0	1	0.199172
ENSG00000047315	POLR2B	0	1	0.199182
ENSG00000146729	NIPSNAP2	0	1	0.199242
ENSG00000123136	DDX39A	0	1	0.199359
ENSG00000154803	FLCN	0	2	0.19945
ENSG00000137821	LRRC49	0	1	0.199485
ENSG00000160785	SLC25A44	0	1	0.199485
ENSG00000183762	KREMEN1	0	1	0.199543
ENSG00000153214	TMEM87B	0	1	0.199579
ENSG00000161671	EMC10	0	2	0.199586
ENSG00000100441	KHNYN	0	1	0.19966
ENSG00000069329	VPS35	0	1	0.199686
ENSG00000136813	ECPAS	0	1	0.199741
ENSG00000161638	ITGA5	0	1	0.199825
ENSG00000132471	WBP2	0	1	0.199828
ENSG00000161888	SPC24	0	1	0.199832
ENSG00000076706	MCAM	0	1	0.199936
ENSG00000112419	PHACTR2	0	1	0.199936
ENSG00000132026	RTBDN	0	1	0.199962
ENSG00000116977	LGALS8	0	1	0.200105
ENSG00000143842	SOX13	0	1	0.200105
ENSG00000237441	RGL2	0	1	0.200248
ENSG00000175318	GRAMD2A	0	1	0.200254
ENSG00000003056	M6PR	0	1	0.2003
ENSG00000105357	MYH14	0	1	0.2003
ENSG00000152705	CATSPER3	0	2	0.200398
ENSG00000073598	FNDC8	0	2	0.200402
ENSG00000005421	PON1	0	2	0.200418
ENSG00000111727	HCFC2	0	1	0.200482
ENSG00000040341	STAU2	0	2	0.200483
ENSG00000121749	TBC1D15	0	1	0.200483
ENSG00000108091	CCDC6	0	1	0.200598
ENSG00000169495	HTRA4	0	1	0.200598
ENSG00000124232	RBPJL	0	1	0.200624
ENSG00000160446	ZDHHC12	0	2	0.200634
ENSG00000108825	PTGES3L-AARSD1	0	1	0.200692
ENSG00000139173	TMEM117	0	1	0.200692
ENSG00000141252	VPS53	0	2	0.200707
ENSG00000117500	TMED5	0	2	0.200988
ENSG00000135622	SEMA4F	0	1	0.201013
ENSG00000176095	IP6K1	0	1	0.201013
ENSG00000170892	TSEN34	0	1	0.201111
ENSG00000131059	BPIFA3	0	1	0.201138
ENSG00000157510	AFAP1L1	0	1	0.201186
ENSG00000101782	RIOK3	0	1	0.201242
ENSG00000186854	TRABD2A	0	2	0.201255
ENSG00000130340	SNX9	0	1	0.201323
ENSG00000182326	C1S	0	1	0.201379
ENSG00000137364	TPMT	0	2	0.20144
ENSG00000177981	ASB8	0	1	0.201471
ENSG00000172794	RAB37	0	1	0.201485
ENSG00000063601	MTMR1	0	1	0.201501
ENSG00000204446	LINC02872	0	1	0.201501
ENSG00000068976	PYGM	0	2	0.201516
ENSG00000165516	KLHDC2	0	1	0.201536
ENSG00000127831	VIL1	0	1	0.20159
ENSG00000100448	CTSG	0	1	0.2016
ENSG00000148606	POLR3A	0	1	0.2016
ENSG00000116266	STXBP3	0	1	0.201601
ENSG00000152382	TADA1	0	1	0.201601
ENSG00000128928	IVD	0	1	0.201639
ENSG00000185379	RAD51D	0	1	0.201639
ENSG00000134873	CLDN10	0	1	0.201745
ENSG00000013725	CD6	0	1	0.201749
ENSG00000108465	CDK5RAP3	0	2	0.201749
ENSG00000087053	MTMR2	0	1	0.201761
ENSG00000127946	HIP1	0	1	0.201761
ENSG00000159788	RGS12	0	1	0.201761
ENSG00000088766	CRLS1	0	1	0.201786
ENSG00000119655	NPC2	0	1	0.201786
ENSG00000187664	HAPLN4	0	1	0.201786
ENSG00000118402	ELOVL4	0	1	0.201822
ENSG00000159733	ZFYVE28	0	1	0.201822
ENSG00000198001	IRAK4	0	1	0.201822
ENSG00000066827	ZFAT	0	1	0.2019
ENSG00000102805	CLN5	0	1	0.2019
ENSG00000131686	CA6	0	1	0.2019
ENSG00000204267	TAP2	0	2	0.201906
ENSG00000100626	GALNT16	0	1	0.201942
ENSG00000145321	GC	0	1	0.201942
ENSG00000177453	NIM1K	0	1	0.201942
ENSG00000164403	SHROOM1	0	1	0.202084
ENSG00000105202	FBL	0	1	0.202092
ENSG00000107159	CA9	0	1	0.202092
ENSG00000130035	GALNT8	0	1	0.202118
ENSG00000139970	RTN1	0	1	0.202118
ENSG00000047849	MAP4	0	1	0.202285
ENSG00000148834	GSTO1	0	1	0.202285
ENSG00000159625	DRC7	0	1	0.202345
ENSG00000075539	FRYL	0	1	0.202456
ENSG00000090674	MCOLN1	0	1	0.202456
ENSG00000167769	ACER1	0	1	0.202456
ENSG00000168890	TMEM150A	0	2	0.202456
ENSG00000198818	SFT2D1	0	1	0.202456
ENSG00000100918	REC8	0	1	0.202555
ENSG00000188868	ZNF563	0	1	0.202605
ENSG00000181284	TMEM102	0	1	0.202776
ENSG00000161849	KRT84	0	2	0.202876
ENSG00000095015	MAP3K1	0	1	0.202933
ENSG00000124198	ARFGEF2	0	1	0.202933
ENSG00000129221	AIPL1	0	1	0.202933
ENSG00000182901	RGS7	0	1	0.202933
ENSG00000106077	ABHD11	0	1	0.202971
ENSG00000213347	MXD3	0	2	0.202998
ENSG00000076641	PAG1	0	1	0.203003
ENSG00000100241	SBF1	0	1	0.203095
ENSG00000119487	MAPKAP1	0	1	0.203095
ENSG00000187123	LYPD6	0	1	0.203095
ENSG00000082805	ERC1	0	1	0.203127
ENSG00000174839	DENND6A	0	1	0.203317
ENSG00000134897	BIVM	0	1	0.203376
ENSG00000134827	TCN1	0	1	0.20338
ENSG00000215193	PEX26	0	1	0.20338
ENSG00000065057	NTHL1	0	1	0.203392
ENSG00000130734	ATG4D	0	1	0.203392
ENSG00000150556	LYPD6B	0	1	0.203405
ENSG00000153012	LGI2	0	1	0.203405
ENSG00000101323	HAO1	0	2	0.203451
ENSG00000149929	HIRIP3	0	1	0.203479
ENSG00000182580	EPHB3	0	1	0.203479
ENSG00000068784	SRBD1	0	1	0.203499
ENSG00000173933	RBM4	0	1	0.203509
ENSG00000196878	LAMB3	0	1	0.203616
ENSG00000198732	SMOC1	0	1	0.203616
ENSG00000130508	PXDN	0	2	0.20364
[truncated: 3,817 more rows]

## Sheet: Recessive model
Ensembl Gene ID	Gene Symbol	Cases (n=66)	Controls (n=2923)	p values
ENSG00000114124	GRK7	2	2	0.000219159
ENSG00000105135	ILVBL	1	0	0.000959257
ENSG00000197858	GPAA1	1	0	0.000959257
ENSG00000185008	ROBO2	1	0	0.00138229
ENSG00000105278	ZFR2	1	0	0.00139769
ENSG00000136153	LMO7	1	0	0.00140962
ENSG00000178343	SHISA3	1	0	0.00146356
ENSG00000205730	ITPRIPL2	1	0	0.00151591
ENSG00000131737	KRT34	1	0	0.00161245
ENSG00000143515	ATP8B2	1	0	0.00161245
ENSG00000049323	LTBP1	1	0	0.00182674
ENSG00000149488	TMC2	1	0	0.00182674
ENSG00000139725	RHOF	1	0	0.00186517
ENSG00000140057	AK7	1	0	0.00186517
ENSG00000074276	CDHR2	1	0	0.00188683
ENSG00000148219	ASTN2	1	0	0.00189413
ENSG00000107959	PITRM1	1	0	0.0019383
ENSG00000166278	C2	1	0	0.0019383
ENSG00000100479	POLE2	1	0	0.00212165
ENSG00000104856	RELB	1	0	0.00232813
ENSG00000184956	MUC6	1	0	0.00232813
ENSG00000155827	RNF20	1	0	0.00244732
ENSG00000162627	SNX7	1	1	0.00255708
ENSG00000198842	STYXL2	1	0	0.00285252
ENSG00000104936	DMPK	1	0	0.00311605
ENSG00000183773	AIFM3	1	1	0.00371864
ENSG00000170276	HSPB2	1	0	0.00376639
ENSG00000243156	MICAL3	1	1	0.00408721
ENSG00000115267	IFIH1	1	0	0.00413137
ENSG00000168306	ACOX2	1	0	0.00413137
ENSG00000042781	USH2A	2	10	0.0045707
ENSG00000101203	COL20A1	1	1	0.0052448
ENSG00000156535	CD109	1	1	0.00525956
ENSG00000036448	MYOM2	1	1	0.00528394
ENSG00000203734	ECT2L	1	0	0.00542885
ENSG00000187605	TET3	1	1	0.00577127
ENSG00000112159	MDN1	2	9	0.00604763
ENSG00000090861	AARS1	1	2	0.00726983
ENSG00000080839	RBL1	1	0	0.00743044
ENSG00000138771	SHROOM3	1	0	0.00743044
ENSG00000140326	CDAN1	1	2	0.00743975
ENSG00000167037	SGSM1	1	1	0.00806899
ENSG00000251664	PCDHA12	1	2	0.00845608
ENSG00000110514	MADD	1	3	0.00847397
ENSG00000204219	TCEA3	1	0	0.00897125
ENSG00000163817	SLC6A20	1	2	0.00940692
ENSG00000197410	DCHS2	1	2	0.00981091
ENSG00000138400	MDH1B	1	0	0.00988283
ENSG00000146122	DAAM2	1	2	0.00997581
ENSG00000094975	SUCO	1	2	0.0100782
ENSG00000179151	EDC3	1	2	0.010866
ENSG00000187323	DCC	1	3	0.0131035
ENSG00000130714	POMT1	1	2	0.0135693
ENSG00000065526	SPEN	1	2	0.01433
ENSG00000204613	TRIM10	1	4	0.0148947
ENSG00000058085	LAMC2	1	3	0.0151046
ENSG00000107099	DOCK8	1	2	0.0167483
ENSG00000135749	PCNX2	1	5	0.0179189
ENSG00000183091	NEB	3	37	0.0190258
ENSG00000173517	PEAK1	1	0	0.0204701
ENSG00000146067	FAM193B	1	4	0.0206747
ENSG00000081760	AACS	1	1	0.0216018
ENSG00000258588	TRIM6-TRIM34	1	4	0.0217609
ENSG00000125746	EML2	1	1	0.023603
ENSG00000162068	NTN3	2	20	0.0270027
ENSG00000008300	CELSR3	1	6	0.0290372
ENSG00000138759	FRAS1	2	22	0.0326023
ENSG00000154134	ROBO3	1	6	0.0356875
ENSG00000143126	CELSR2	1	7	0.036258
ENSG00000149115	TNKS1BP1	1	2	0.0395493
ENSG00000104133	SPG11	1	5	0.0405969
ENSG00000004897	CDC27	1	258	0.0419921
ENSG00000088280	ASAP3	1	5	0.0457845
ENSG00000095981	KCNK16	1	7	0.0466378
ENSG00000141497	ZMYND15	1	9	0.0480378
ENSG00000179772	FOXS1	1	7	0.0525062
ENSG00000196159	FAT4	1	9	0.0579938
ENSG00000155657	TTN	17	522	0.0639339
ENSG00000114270	COL7A1	1	9	0.0649561
ENSG00000107104	KANK1	1	8	0.0659332
ENSG00000118557	PMFBP1	2	27	0.0774319
ENSG00000175029	CTBP2	0	137	0.0804801
ENSG00000165078	CPA6	1	12	0.0846402
ENSG00000168702	LRP1B	1	10	0.0890958
ENSG00000158486	DNAH3	1	11	0.0965172
ENSG00000164626	KCNK5	0	1	0.106004
ENSG00000111405	ENDOU	0	1	0.106521
ENSG00000163554	SPTA1	1	13	0.108757
ENSG00000147606	SLC26A7	0	1	0.109177
ENSG00000013364	MVP	0	1	0.11046
ENSG00000133048	CHI3L1	0	1	0.110894
ENSG00000049656	CLPTM1L	0	1	0.111475
ENSG00000125355	TMEM255A	0	1	0.11374
ENSG00000162641	AKNAD1	0	1	0.114018
ENSG00000073169	SELENOO	0	1	0.114212
ENSG00000100024	UPB1	0	1	0.114381
ENSG00000047365	ARAP2	0	1	0.115956
ENSG00000147488	ST18	0	1	0.116656
ENSG00000132554	RGS22	0	1	0.116825
ENSG00000164309	CMYA5	0	1	0.116982
ENSG00000170759	KIF5B	0	1	0.116986
ENSG00000007968	E2F2	0	1	0.11849
ENSG00000141252	VPS53	0	1	0.11849
ENSG00000198753	PLXNB3	0	1	0.118737
ENSG00000153339	TRAPPC8	0	1	0.118819
ENSG00000139880	CDH24	0	1	0.119605
ENSG00000164609	SLU7	0	1	0.119785
ENSG00000104611	SH2D4A	0	1	0.119833
ENSG00000139610	CELA1	0	1	0.120365
ENSG00000081479	LRP2	0	1	0.120693
ENSG00000164070	HSPA4L	0	1	0.120693
ENSG00000178522	AMBN	0	1	0.120993
ENSG00000128512	DOCK4	0	1	0.120998
ENSG00000105854	PON2	0	1	0.121931
ENSG00000114933	INO80D	0	1	0.122137
ENSG00000091140	DLD	0	1	0.122274
ENSG00000182095	TNRC18	0	1	0.12245
ENSG00000132549	VPS13B	1	13	0.123227
ENSG00000188176	SMTNL2	0	1	0.123253
ENSG00000170683	OR10A3	0	1	0.123473
ENSG00000100652	SLC10A1	0	1	0.12386
ENSG00000064932	SBNO2	0	1	0.12459
ENSG00000138078	PREPL	0	1	0.12459
ENSG00000123607	TTC21B	0	1	0.12465
ENSG00000138669	PRKG2	0	1	0.124846
ENSG00000156697	UTP14A	0	1	0.124873
ENSG00000131480	AOC2	0	1	0.125109
ENSG00000141577	CEP131	0	1	0.125114
ENSG00000183317	EPHA10	0	1	0.125134
ENSG00000115677	HDLBP	0	1	0.125388
ENSG00000086015	MAST2	0	1	0.125745
ENSG00000084676	NCOA1	0	1	0.126323
ENSG00000117133	RPF1	0	1	0.127034
ENSG00000115649	CNPPD1	0	1	0.127061
ENSG00000070785	EIF2B3	0	1	0.127166
ENSG00000134452	FBH1	0	1	0.127385
ENSG00000126500	FLRT1	0	1	0.127503
ENSG00000122966	CIT	0	1	0.127551
ENSG00000106733	NMRK1	0	1	0.127743
ENSG00000187955	COL14A1	0	1	0.127743
ENSG00000076003	MCM6	0	1	0.12825
ENSG00000151952	TMEM132D	0	1	0.128345
ENSG00000164404	GDF9	0	1	0.128735
ENSG00000196208	GREB1	0	1	0.128834
ENSG00000115232	ITGA4	0	1	0.128863
ENSG00000053108	FSTL4	0	1	0.129685
ENSG00000136152	COG3	0	1	0.129685
ENSG00000188467	SLC24A5	0	1	0.129779
ENSG00000174080	CTSF	0	1	0.129979
ENSG00000136643	RPS6KC1	0	1	0.13109
ENSG00000167701	GPT	0	1	0.131128
ENSG00000114268	PFKFB4	0	1	0.131384
ENSG00000166855	CLPX	0	1	0.131635
ENSG00000116525	TRIM62	0	1	0.131714
ENSG00000145246	ATP10D	0	1	0.131979
ENSG00000072422	RHOBTB1	0	1	0.132058
ENSG00000137571	SLCO5A1	0	1	0.132272
ENSG00000159079	CFAP298	0	1	0.132608
ENSG00000150873	C2orf50	0	1	0.133
ENSG00000196169	KIF19	0	1	0.133336
ENSG00000153064	BANK1	0	1	0.133732
ENSG00000118322	ATP10B	0	1	0.13397
ENSG00000189350	TOGARAM2	0	1	0.13397
ENSG00000135451	TROAP	0	1	0.134002
ENSG00000176231	OR10H4	0	1	0.134096
ENSG00000181026	AEN	0	1	0.134271
ENSG00000127511	SIN3B	0	1	0.134292
ENSG00000137642	SORL1	0	1	0.134292
ENSG00000169291	SHE	0	1	0.134402
ENSG00000166912	MTMR10	0	1	0.1348
ENSG00000002746	HECW1	0	1	0.135496
ENSG00000083782	EPYC	0	1	0.136753
ENSG00000186001	LRCH3	0	1	0.136753
ENSG00000122591	FAM126A	0	1	0.136832
ENSG00000153207	AHCTF1	0	1	0.136832
ENSG00000166333	ILK	0	1	0.13685
ENSG00000197226	TBC1D9B	0	1	0.13685
ENSG00000103365	GGA2	0	1	0.137172
ENSG00000136824	SMC2	0	1	0.137221
ENSG00000134317	GRHL1	0	1	0.137394
ENSG00000144481	TRPM8	0	1	0.137394
ENSG00000058056	USP13	0	1	0.137443
ENSG00000137491	SLCO2B1	0	1	0.13752
ENSG00000182957	SPATA13	0	1	0.137529
ENSG00000148303	RPL7A	0	1	0.137601
ENSG00000136295	TTYH3	0	1	0.137911
ENSG00000046604	DSG2	0	1	0.137938
ENSG00000115211	EIF2B4	0	1	0.138348
ENSG00000204560	DHX16	0	1	0.138409
ENSG00000160392	C19orf47	0	1	0.138417
ENSG00000188089	PLA2G4E	0	1	0.138538
ENSG00000164209	SLC25A46	0	1	0.138579
ENSG00000112796	ENPP5	0	1	0.139008
ENSG00000114982	KANSL3	0	1	0.139008
ENSG00000105499	PLA2G4C	0	1	0.139153
ENSG00000153815	CMIP	0	1	0.139153
ENSG00000157014	TATDN2	0	1	0.139153
ENSG00000105426	PTPRS	0	1	0.139351
ENSG00000184313	MROH7	0	1	0.13945
ENSG00000198795	ZNF521	0	1	0.139504
ENSG00000171587	DSCAM	0	1	0.139577
ENSG00000172731	LRRC20	0	1	0.139884
ENSG00000134389	CFHR5	0	1	0.140073
ENSG00000142303	ADAMTS10	0	1	0.140073
ENSG00000178773	CPNE7	0	1	0.140103
ENSG00000162032	SPSB3	0	1	0.140105
ENSG00000162383	SLC1A7	0	1	0.140155
ENSG00000140199	SLC12A6	0	1	0.140356
ENSG00000182791	CCDC87	0	1	0.140375
ENSG00000197603	CPLANE1	0	1	0.140604
ENSG00000169851	PCDH7	0	1	0.140628
ENSG00000073331	ALPK1	0	1	0.141072
ENSG00000138363	ATIC	0	1	0.141187
ENSG00000044446	PHKA2	0	1	0.141535
ENSG00000158113	LRRC43	0	1	0.141896
ENSG00000213066	CEP43	0	1	0.141896
ENSG00000076685	NT5C2	0	1	0.141932
ENSG00000075826	SEC31B	0	1	0.142063
ENSG00000132915	PDE6A	0	1	0.142371
ENSG00000047188	YTHDC2	0	1	0.142484
ENSG00000092148	HECTD1	0	1	0.142633
ENSG00000070985	TRPM5	0	1	0.143617
ENSG00000135473	PAN2	0	1	0.143617
ENSG00000080293	SCTR	0	1	0.143669
ENSG00000004975	DVL2	0	1	0.143751
ENSG00000214456	PLIN5	0	1	0.143769
ENSG00000254245	PCDHGA3	0	1	0.143769
ENSG00000133318	RTN3	0	1	0.14413
ENSG00000136011	STAB2	0	1	0.144426
ENSG00000081692	JMJD4	0	1	0.144457
ENSG00000256870	SLC5A8	0	1	0.144719
ENSG00000117054	ACADM	0	1	0.145002
ENSG00000146776	ATXN7L1	0	1	0.145113
ENSG00000197776	KLHDC1	0	1	0.145266
ENSG00000243232	PCDHAC2	0	1	0.145291
ENSG00000167968	DNASE1L2	0	1	0.145335
ENSG00000134874	DZIP1	0	1	0.145484
ENSG00000145990	GFOD1	0	1	0.145609
ENSG00000023608	SNAPC1	0	1	0.145812
ENSG00000244607	CCDC13	0	1	0.145812
ENSG00000108551	RASD1	0	1	0.146035
ENSG00000011275	RNF216	0	1	0.146151
ENSG00000113318	MSH3	0	1	0.146151
ENSG00000225614	ZNF469	0	1	0.146151
ENSG00000141338	ABCA8	0	1	0.146161
ENSG00000054523	KIF1B	0	1	0.14633
ENSG00000204843	DCTN1	0	1	0.14633
ENSG00000130508	PXDN	0	1	0.146516
ENSG00000198010	DLGAP2	0	1	0.146516
ENSG00000176771	NCKAP5	0	1	0.146592
ENSG00000184305	CCSER1	0	1	0.146758
ENSG00000144893	MED12L	0	1	0.146829
ENSG00000075643	MOCOS	0	1	0.146955
ENSG00000123552	USP45	0	1	0.147037
ENSG00000165684	SNAPC4	0	1	0.147064
ENSG00000135763	URB2	0	1	0.147233
ENSG00000197125	OR8B8	0	1	0.147233
ENSG00000109736	MFSD10	0	1	0.147234
ENSG00000119685	TTLL5	0	1	0.147242
ENSG00000241058	NSUN6	0	1	0.147254
ENSG00000176219	OR11H6	0	1	0.147291
ENSG00000042493	CAPG	0	1	0.147351
ENSG00000111664	GNB3	0	1	0.147491
ENSG00000205560	CPT1B	0	1	0.147597
ENSG00000168016	TRANK1	0	1	0.147696
ENSG00000102452	NALCN	0	1	0.147823
ENSG00000205085	FAM71F2	0	1	0.148059
ENSG00000103494	RPGRIP1L	0	1	0.148069
ENSG00000184347	SLIT3	0	1	0.148184
ENSG00000185591	SP1	0	1	0.148237
ENSG00000137500	CCDC90B	0	1	0.148237
ENSG00000166887	VPS39	0	1	0.148414
ENSG00000111961	SASH1	0	1	0.148449
ENSG00000155363	MOV10	0	1	0.148576
ENSG00000124496	TRERF1	0	1	0.148594
ENSG00000112651	MRPL2	0	1	0.148685
ENSG00000110628	SLC22A18	0	1	0.148865
ENSG00000024048	UBR2	0	1	0.14887
ENSG00000174640	SLCO2A1	0	1	0.14887
ENSG00000140538	NTRK3	0	1	0.14888
ENSG00000163833	FBXO40	0	1	0.148884
ENSG00000105851	PIK3CG	0	1	0.148923
ENSG00000185608	MRPL40	0	1	0.148944
ENSG00000227057	WDR46	0	1	0.149118
ENSG00000105738	SIPA1L3	0	1	0.149308
ENSG00000138802	SEC24B	0	1	0.149482
ENSG00000162236	STX5	0	1	0.14958
ENSG00000180773	SLC36A4	0	1	0.14958
ENSG00000114346	ECT2	0	1	0.149609
ENSG00000204120	GIGYF2	0	1	0.149609
ENSG00000138134	STAMBPL1	0	1	0.149804
ENSG00000101746	NOL4	0	1	0.149861
ENSG00000106034	CPED1	0	1	0.149861
ENSG00000006634	DBF4	0	1	0.149969
ENSG00000164796	CSMD3	0	1	0.150283
ENSG00000088836	SLC4A11	0	1	0.150403
ENSG00000169684	CHRNA5	0	1	0.1505
ENSG00000136492	BRIP1	0	1	0.150619
ENSG00000159063	ALG8	0	1	0.150619
ENSG00000133597	ADCK2	0	1	0.150632
ENSG00000172273	HINFP	0	1	0.150782
ENSG00000134899	ERCC5	0	1	0.150995
ENSG00000136960	ENPP2	0	1	0.150995
ENSG00000152556	PFKM	0	1	0.151023
ENSG00000174485	DENND4A	0	1	0.151023
ENSG00000075651	PLD1	0	1	0.151037
ENSG00000175520	UBQLN3	0	1	0.151037
ENSG00000174348	PODN	0	1	0.151165
ENSG00000091428	RAPGEF4	0	1	0.151205
ENSG00000187098	MITF	0	1	0.151348
ENSG00000135972	MRPS9	0	1	0.15152
ENSG00000163947	ARHGEF3	0	1	0.151642
ENSG00000108384	RAD51C	0	1	0.151697
ENSG00000083067	TRPM3	0	1	0.1517
ENSG00000011083	SLC6A7	0	1	0.151879
ENSG00000104808	DHDH	0	1	0.151908
ENSG00000183856	IQGAP3	0	1	0.152047
ENSG00000138653	NDST4	0	1	0.152142
ENSG00000148700	ADD3	0	1	0.152379
ENSG00000164975	SNAPC3	0	1	0.152973
ENSG00000115687	PASK	0	1	0.152998
ENSG00000087502	ERGIC2	0	1	0.153043
ENSG00000176601	MAP3K19	0	1	0.15311
ENSG00000122367	LDB3	0	1	0.153128
ENSG00000148335	NTMT1	0	1	0.153208
ENSG00000162426	SLC45A1	0	1	0.153213
ENSG00000140107	SLC25A47	0	1	0.153611
ENSG00000146477	SLC22A3	0	1	0.153637
ENSG00000021826	CPS1	0	1	0.154169
ENSG00000186976	EFCAB6	0	1	0.154198
ENSG00000149091	DGKZ	0	1	0.154216
ENSG00000042832	TG	0	1	0.154432
ENSG00000106346	USP42	0	1	0.154432
ENSG00000116127	ALMS1	0	1	0.154432
ENSG00000006607	FARP2	0	1	0.154704
ENSG00000100473	COCH	0	1	0.154914
ENSG00000101191	DIDO1	0	1	0.154914
ENSG00000172482	AGXT	0	1	0.155029
ENSG00000144736	SHQ1	0	1	0.155199
ENSG00000101400	SNTA1	0	1	0.155252
ENSG00000113522	RAD50	0	1	0.15567
ENSG00000143951	WDPCP	0	1	0.156213
ENSG00000172037	LAMB2	0	1	0.156213
ENSG00000186951	PPARA	0	1	0.156476
ENSG00000183421	RIPK4	0	1	0.156486
ENSG00000169247	SH3TC2	0	1	0.156627
ENSG00000119760	SUPT7L	0	1	0.156685
ENSG00000143882	ATP6V1C2	0	1	0.156849
ENSG00000156976	EIF4A2	0	1	0.156849
ENSG00000133710	SPINK5	0	1	0.156933
ENSG00000158258	CLSTN2	0	1	0.157092
ENSG00000171735	CAMTA1	0	1	0.157097
ENSG00000247596	TWF2	0	1	0.157534
ENSG00000112053	SLC26A8	0	1	0.15755
ENSG00000187678	SPRY4	0	1	0.157627
ENSG00000160299	PCNT	0	1	0.157637
ENSG00000012822	CALCOCO1	0	1	0.157649
ENSG00000161021	MAML1	0	1	0.157763
ENSG00000104067	TJP1	0	1	0.157877
ENSG00000144118	RALB	0	1	0.157949
ENSG00000145362	ANK2	0	1	0.157956
ENSG00000082074	FYB1	0	1	0.158033
ENSG00000120896	SORBS3	0	1	0.158107
ENSG00000138101	DTNB	0	1	0.158121
ENSG00000002822	MAD1L1	0	1	0.158129
ENSG00000143498	TAF1A	0	1	0.158135
ENSG00000146918	NCAPG2	0	1	0.158135
ENSG00000016602	CLCA4	0	1	0.158154
ENSG00000085552	IGSF9	0	1	0.158154
ENSG00000128815	WDFY4	0	1	0.158174
ENSG00000170325	PRDM10	0	1	0.158174
ENSG00000140450	ARRDC4	0	1	0.158299
ENSG00000169908	TM4SF1	0	1	0.158311
ENSG00000111670	GNPTAB	0	1	0.158329
ENSG00000065548	ZC3H15	0	1	0.158351
ENSG00000161609	KASH5	0	1	0.158567
ENSG00000174343	CHRNA9	0	1	0.158567
ENSG00000106348	IMPDH1	0	1	0.158589
ENSG00000160185	UBASH3A	0	1	0.158598
ENSG00000185875	THNSL1	0	1	0.158598
ENSG00000027001	MIPEP	0	1	0.158779
ENSG00000141434	MEP1B	0	1	0.158825
ENSG00000139517	LNX2	0	1	0.15887
ENSG00000170807	LMOD2	0	1	0.15887
ENSG00000104412	EMC2	0	1	0.1589
ENSG00000166444	DENND2B	0	1	0.159015
ENSG00000204084	INPP5B	0	1	0.159105
ENSG00000135074	ADAM19	0	1	0.159224
ENSG00000111275	ALDH2	0	1	0.159225
ENSG00000145348	TBCK	0	1	0.159247
ENSG00000188811	NHLRC3	0	1	0.159247
ENSG00000112996	MRPS30	0	1	0.159259
ENSG00000140534	TICRR	0	1	0.159316
ENSG00000171681	ATF7IP	0	1	0.159354
ENSG00000165966	PDZRN4	0	1	0.159462
ENSG00000105929	ATP6V0A4	0	1	0.159474
ENSG00000108256	NUFIP2	0	1	0.159474
ENSG00000139648	KRT71	0	1	0.159474
ENSG00000101004	NINL	0	2	0.159486
ENSG00000163751	CPA3	0	1	0.159674
ENSG00000067057	PFKP	0	1	0.159726
ENSG00000181333	HEPHL1	0	1	0.159733
ENSG00000158966	CACHD1	0	1	0.159804
ENSG00000116774	OLFML3	0	1	0.160096
ENSG00000110328	GALNT18	0	1	0.160109
ENSG00000168970	JMJD7-PLA2G4B	0	1	0.160165
ENSG00000126217	MCF2L	0	1	0.160166
ENSG00000140986	RPL3L	0	1	0.160166
ENSG00000158636	EMSY	0	1	0.160166
ENSG00000136161	RCBTB2	0	1	0.160423
ENSG00000141977	CIB3	0	1	0.160423
ENSG00000149124	GLYAT	0	1	0.160423
ENSG00000162931	TRIM17	0	1	0.160423
ENSG00000117322	CR2	0	1	0.160474
ENSG00000132669	RIN2	0	1	0.160645
ENSG00000187741	FANCA	0	1	0.160968
ENSG00000074527	NTN4	0	1	0.160985
ENSG00000103154	NECAB2	0	1	0.160991
ENSG00000141380	SS18	0	1	0.161032
ENSG00000162520	SYNC	0	1	0.161075
ENSG00000140691	ARMC5	0	1	0.161363
ENSG00000140575	IQGAP1	0	1	0.16144
ENSG00000120253	NUP43	0	1	0.161535
ENSG00000183828	NUDT14	0	1	0.161535
ENSG00000053524	MCF2L2	0	1	0.161574
ENSG00000112473	SLC39A7	0	1	0.161937
ENSG00000140006	WDR89	0	1	0.162012
ENSG00000070915	SLC12A3	0	1	0.162036
ENSG00000101349	PAK5	0	1	0.162036
ENSG00000103326	CAPN15	0	1	0.162129
ENSG00000129003	VPS13C	0	1	0.162297
ENSG00000180988	OR52N2	0	1	0.162316
ENSG00000134369	NAV1	0	1	0.162519
ENSG00000112530	PACRG	0	1	0.162525
ENSG00000149218	ENDOD1	0	1	0.162814
ENSG00000166938	DIS3L	0	1	0.162901
ENSG00000179409	GEMIN4	0	1	0.162923
ENSG00000133858	ZFC3H1	0	2	0.162975
ENSG00000077782	FGFR1	0	1	0.163008
ENSG00000099219	ERMP1	0	1	0.163067
ENSG00000151062	CACNA2D4	0	1	0.163078
ENSG00000108106	UBE2S	0	1	0.163262
ENSG00000034533	ASTE1	0	1	0.1636
ENSG00000095383	TBC1D2	0	1	0.163771
ENSG00000115825	PRKD3	0	1	0.163867
ENSG00000138434	ITPRID2	0	1	0.163914
ENSG00000010256	UQCRC1	0	1	0.163914
ENSG00000117597	UTP25	0	1	0.163937
ENSG00000205221	VIT	0	1	0.163953
ENSG00000100084	HIRA	0	1	0.16397
ENSG00000179981	TSHZ1	0	1	0.164051
ENSG00000173175	ADCY5	0	1	0.164237
ENSG00000105639	JAK3	0	1	0.164405
ENSG00000011405	PIK3C2A	0	1	0.164553
ENSG00000163638	ADAMTS9	0	1	0.16465
ENSG00000183186	C2CD4C	0	1	0.164809
ENSG00000077522	ACTN2	0	1	0.164822
ENSG00000174175	SELP	0	1	0.164822
ENSG00000183020	AP2A2	0	1	0.164948
ENSG00000073910	FRY	0	1	0.164978
ENSG00000185532	PRKG1	0	1	0.165053
ENSG00000164087	POC1A	0	1	0.165073
ENSG00000164488	DACT2	0	1	0.165105
ENSG00000255346	NOX5	0	1	0.165223
ENSG00000132109	TRIM21	0	1	0.165444
ENSG00000120800	UTP20	0	1	0.165528
ENSG00000145012	LPP	0	1	0.165588
ENSG00000239388	ASB14	0	1	0.165611
ENSG00000147596	PRDM14	0	1	0.165715
ENSG00000095637	SORBS1	0	1	0.165755
ENSG00000137745	MMP13	0	1	0.165768
ENSG00000171433	GLOD5	0	1	0.165769
ENSG00000125637	PSD4	0	1	0.165818
ENSG00000244045	TMEM199	0	1	0.165818
ENSG00000138658	ZGRF1	0	1	0.165842
ENSG00000004455	AK2	0	1	0.165927
ENSG00000214338	SOGA3	0	1	0.165941
ENSG00000144488	ESPNL	0	1	0.166427
ENSG00000088812	ATRN	0	1	0.166493
ENSG00000104325	DECR1	0	1	0.166509
ENSG00000085491	SLC25A24	0	1	0.166606
ENSG00000156502	SUPV3L1	0	1	0.166606
ENSG00000104643	MTMR9	0	1	0.166706
ENSG00000133107	TRPC4	0	1	0.166748
ENSG00000131652	THOC6	0	1	0.166996
ENSG00000114529	C3orf52	0	1	0.167102
ENSG00000079432	CIC	0	1	0.167248
ENSG00000054965	FAM168A	0	1	0.167435
ENSG00000188566	NDOR1	0	1	0.167509
ENSG00000081923	ATP8B1	0	1	0.16767
ENSG00000120278	PLEKHG1	0	1	0.16767
ENSG00000126602	TRAP1	0	1	0.16767
ENSG00000146453	PNLDC1	0	1	0.16804
ENSG00000184445	KNTC1	0	1	0.16804
ENSG00000115904	SOS1	0	1	0.168064
ENSG00000070814	TCOF1	0	1	0.168374
ENSG00000158006	PAFAH2	0	1	0.168374
ENSG00000088538	DOCK3	0	1	0.168449
ENSG00000065882	TBC1D1	0	1	0.168524
ENSG00000149308	NPAT	0	1	0.168524
ENSG00000137478	FCHSD2	0	1	0.168536
ENSG00000081026	MAGI3	0	1	0.168541
ENSG00000149925	ALDOA	0	1	0.168557
ENSG00000151461	UPF2	0	1	0.168562
ENSG00000093217	XYLB	0	1	0.16864
ENSG00000164967	RPP25L	0	1	0.16864
ENSG00000160746	ANO10	0	1	0.168879
ENSG00000188175	HEPACAM2	0	1	0.168879
ENSG00000123146	ADGRE5	0	1	0.168934
ENSG00000118705	RPN2	0	1	0.169026
ENSG00000164068	RNF123	0	1	0.169032
ENSG00000101474	APMAP	0	1	0.169068
ENSG00000064655	EYA2	0	1	0.169185
ENSG00000187231	SESTD1	0	1	0.169185
ENSG00000132275	RRP8	0	1	0.169539
ENSG00000186517	ARHGAP30	0	1	0.169673
ENSG00000244405	ETV5	0	1	0.169673
ENSG00000156931	VPS8	0	1	0.169775
ENSG00000177469	CAVIN1	0	1	0.169775
ENSG00000184661	CDCA2	0	1	0.16981
ENSG00000077150	NFKB2	0	1	0.169827
ENSG00000147459	DOCK5	0	1	0.169844
ENSG00000011258	MBTD1	0	1	0.16992
ENSG00000104880	ARHGEF18	0	1	0.16992
ENSG00000181085	MAPK15	0	1	0.170056
ENSG00000148426	PROSER2	0	1	0.170073
ENSG00000123453	SARDH	0	1	0.170165
ENSG00000163933	RFT1	0	1	0.170247
ENSG00000010803	SCMH1	0	1	0.170289
ENSG00000178177	LCORL	0	1	0.170429
ENSG00000213996	TM6SF2	0	1	0.170429
ENSG00000133401	PDZD2	0	1	0.170441
ENSG00000047579	DTNBP1	0	1	0.170457
ENSG00000198265	HELZ	0	1	0.170457
ENSG00000123836	PFKFB2	0	1	0.170471
ENSG00000160282	FTCD	0	1	0.170534
ENSG00000103051	COG4	0	1	0.170585
ENSG00000167483	NIBAN3	0	1	0.17062
ENSG00000121152	NCAPH	0	1	0.170679
ENSG00000176567	OR4X1	0	1	0.170827
ENSG00000104356	POP1	0	1	0.170932
ENSG00000145088	EAF2	0	1	0.170932
ENSG00000100938	GMPR2	0	1	0.171065
ENSG00000163913	IFT122	0	1	0.171098
ENSG00000103316	CRYM	0	1	0.171189
ENSG00000138758	SEPTIN11	0	1	0.171189
ENSG00000149658	YTHDF1	0	1	0.171189
ENSG00000129993	CBFA2T3	0	1	0.171369
ENSG00000167721	TSR1	0	1	0.171369
ENSG00000125319	HROB	0	1	0.17144
ENSG00000129988	LBP	0	1	0.17144
ENSG00000141736	ERBB2	0	1	0.171491
ENSG00000170178	HOXD12	0	1	0.171491
ENSG00000109684	CLNK	0	1	0.171518
ENSG00000154781	CCDC174	0	1	0.171606
ENSG00000204248	COL11A2	0	1	0.171606
ENSG00000221866	PLXNA4	0	1	0.171729
ENSG00000162849	KIF26B	0	1	0.17185
ENSG00000149972	CNTN5	0	2	0.171898
ENSG00000180398	MCFD2	0	1	0.171953
ENSG00000157388	CACNA1D	0	1	0.172103
ENSG00000137225	CAPN11	0	1	0.172224
ENSG00000184384	MAML2	0	1	0.172375
ENSG00000163629	PTPN13	0	1	0.172416
ENSG00000038382	TRIO	0	1	0.172477
ENSG00000102804	TSC22D1	0	1	0.172519
ENSG00000101255	TRIB3	0	1	0.172691
ENSG00000103534	TMC5	0	1	0.172776
ENSG00000112144	CILK1	0	1	0.172776
ENSG00000136197	C7orf25	0	1	0.173073
ENSG00000197016	ZNF470	0	2	0.173097
ENSG00000087111	PIGS	0	1	0.173157
ENSG00000168528	SERINC2	0	1	0.173157
ENSG00000165588	OTX2	0	1	0.173176
ENSG00000155561	NUP205	0	1	0.173263
ENSG00000156140	ADAMTS3	0	1	0.173263
ENSG00000236981	OR10G9	0	1	0.173361
ENSG00000160633	SAFB	0	1	0.173402
ENSG00000106948	AKNA	0	1	0.173422
ENSG00000116871	MAP7D1	0	1	0.173582
ENSG00000173218	VANGL1	0	1	0.173621
ENSG00000138385	SSB	0	1	0.173638
ENSG00000143641	GALNT2	0	1	0.173717
ENSG00000163808	KIF15	0	1	0.173717
ENSG00000127980	PEX1	0	1	0.173799
ENSG00000196639	HRH1	0	1	0.173963
ENSG00000166261	ZNF202	0	1	0.17404
ENSG00000164615	CAMLG	0	1	0.174311
ENSG00000177663	IL17RA	0	1	0.174311
ENSG00000106524	ANKMY2	0	1	0.174322
ENSG00000185133	INPP5J	0	1	0.174483
ENSG00000102710	SUPT20H	0	1	0.174499
ENSG00000058600	POLR3E	0	1	0.174506
ENSG00000160883	HK3	0	1	0.174506
ENSG00000173320	STOX2	0	1	0.174506
ENSG00000196663	TECPR2	0	1	0.174506
ENSG00000185972	CCIN	0	1	0.174714
ENSG00000167522	ANKRD11	0	1	0.174757
ENSG00000173801	JUP	0	1	0.174763
ENSG00000050405	LIMA1	0	1	0.174814
ENSG00000010379	SLC6A13	0	1	0.174862
ENSG00000105392	CRX	0	1	0.17497
ENSG00000138375	SMARCAL1	0	1	0.175104
ENSG00000143376	SNX27	0	1	0.175117
ENSG00000232040	ZBED9	0	1	0.17513
ENSG00000139218	SCAF11	0	2	0.175185
ENSG00000101974	ATP11C	0	1	0.175249
ENSG00000169231	THBS3	0	1	0.175368
ENSG00000179889	PDXDC1	0	1	0.175522
ENSG00000158014	SLC30A2	0	1	0.175592
ENSG00000156802	ATAD2	0	1	0.175713
ENSG00000140279	DUOX2	0	1	0.175779
ENSG00000114450	GNB4	0	1	0.175865
ENSG00000169031	COL4A3	0	1	0.175865
ENSG00000084774	CAD	0	1	0.175971
ENSG00000119723	COQ6	0	1	0.175971
ENSG00000147873	IFNA5	0	1	0.175971
ENSG00000140527	WDR93	0	1	0.17617
ENSG00000147050	KDM6A	0	1	0.17617
ENSG00000187726	DNAJB13	0	1	0.17617
ENSG00000103245	CIAO3	0	1	0.176211
ENSG00000063241	ISOC2	0	1	0.176463
ENSG00000119227	PIGZ	0	1	0.176463
ENSG00000144560	VGLL4	0	1	0.176463
ENSG00000071794	HLTF	0	1	0.176503
ENSG00000147614	ATP6V0D2	0	1	0.17662
ENSG00000162909	CAPN2	0	1	0.177104
ENSG00000153774	CFDP1	0	1	0.177181
ENSG00000085511	MAP3K4	0	1	0.177263
ENSG00000139287	TPH2	0	1	0.177263
ENSG00000119596	YLPM1	0	1	0.177356
ENSG00000153930	ANKFN1	0	1	0.177405
ENSG00000136122	BORA	0	1	0.177649
ENSG00000166987	MBD6	0	1	0.177649
ENSG00000215421	ZNF407	0	1	0.177649
ENSG00000110169	HPX	0	1	0.177703
ENSG00000172059	KLF11	0	1	0.17776
ENSG00000109445	ZNF330	0	1	0.177771
ENSG00000130876	SLC7A10	0	1	0.177848
ENSG00000171561	OR2AT4	0	1	0.177878
ENSG00000157657	ZNF618	0	1	0.177955
ENSG00000132740	IGHMBP2	0	1	0.177978
ENSG00000091009	RBM27	0	1	0.178068
ENSG00000084110	HAL	0	1	0.178073
ENSG00000124459	ZNF45	0	1	0.178271
ENSG00000110104	CCDC86	0	1	0.178279
ENSG00000137878	GCOM1	0	1	0.178281
ENSG00000181092	ADIPOQ	0	1	0.178306
ENSG00000135912	TTLL4	0	1	0.178319
ENSG00000106351	AGFG2	0	1	0.178332
ENSG00000110046	ATG2A	0	1	0.178396
ENSG00000145982	FARS2	0	1	0.178396
ENSG00000110697	PITPNM1	0	1	0.178468
ENSG00000131697	NPHP4	0	1	0.178652
ENSG00000083444	PLOD1	0	1	0.178726
ENSG00000163394	CCKAR	0	1	0.178786
ENSG00000142731	PLK4	0	1	0.178805
ENSG00000171431	KRT20	0	1	0.178805
ENSG00000173230	GOLGB1	0	1	0.178815
ENSG00000165699	TSC1	0	1	0.178842
ENSG00000172159	FRMD3	0	1	0.178842
ENSG00000197965	MPZL1	0	1	0.178854
ENSG00000068831	RASGRP2	0	1	0.178892
ENSG00000204394	VARS1	0	1	0.178944
ENSG00000135723	FHOD1	0	1	0.178994
ENSG00000168890	TMEM150A	0	1	0.179427
ENSG00000111731	C2CD5	0	1	0.179486
ENSG00000175595	ERCC4	0	1	0.179493
ENSG00000198625	MDM4	0	1	0.179493
ENSG00000133958	UNC79	0	1	0.179495
ENSG00000139835	GRTP1	0	1	0.179495
ENSG00000010319	SEMA3G	0	1	0.179508
ENSG00000187806	TMEM202	0	1	0.179526
ENSG00000221843	C2orf16	0	1	0.179792
ENSG00000102595	UGGT2	0	1	0.179836
ENSG00000198911	SREBF2	0	1	0.179836
ENSG00000166535	A2ML1	0	1	0.180056
ENSG00000116729	WLS	0	1	0.180226
ENSG00000142233	NTN5	0	1	0.180229
ENSG00000177943	MAMDC4	0	1	0.180229
ENSG00000115648	MLPH	0	1	0.180301
ENSG00000178297	TMPRSS9	0	1	0.180322
ENSG00000120254	MTHFD1L	0	1	0.18045
ENSG00000171105	INSR	0	1	0.18045
ENSG00000254986	DPP3	0	1	0.18045
ENSG00000092445	TYRO3	0	1	0.180525
ENSG00000110042	DTX4	0	1	0.180591
ENSG00000091262	ABCC6	0	1	0.180663
ENSG00000072778	ACADVL	0	1	0.180714
ENSG00000164619	BMPER	0	1	0.180714
ENSG00000183386	FHL3	0	1	0.180802
ENSG00000102935	ZNF423	0	1	0.180854
ENSG00000146070	PLA2G7	0	1	0.180854
ENSG00000091128	LAMB4	0	1	0.180904
ENSG00000157211	CDCP2	0	1	0.181011
ENSG00000171557	FGG	0	1	0.181032
ENSG00000184056	VPS33B	0	1	0.181542
ENSG00000141696	P3H4	0	1	0.181591
ENSG00000196517	SLC6A9	0	1	0.181628
ENSG00000143553	SNAPIN	0	1	0.181955
ENSG00000170477	KRT4	0	1	0.182006
ENSG00000149311	ATM	0	1	0.182089
ENSG00000058335	RASGRF1	0	1	0.182323
ENSG00000005486	RHBDD2	0	1	0.182353
ENSG00000068878	PSME4	0	2	0.182373
ENSG00000015520	NPC1L1	0	1	0.182383
ENSG00000113615	SEC24A	0	1	0.182383
ENSG00000132781	MUTYH	0	1	0.182383
ENSG00000132681	ATP1A4	0	1	0.182409
ENSG00000081803	CADPS2	0	1	0.18245
ENSG00000198677	TTC37	0	1	0.182496
ENSG00000171097	KYAT1	0	1	0.182527
ENSG00000162804	SNED1	0	1	0.182604
ENSG00000103591	AAGAB	0	1	0.18263
ENSG00000168843	FSTL5	0	1	0.182656
ENSG00000187871	GFRAL	0	1	0.182684
ENSG00000124406	ATP8A1	0	1	0.182712
ENSG00000137103	TMEM8B	0	1	0.182712
ENSG00000138593	SECISBP2L	0	1	0.182782
ENSG00000088179	PTPN4	0	1	0.182851
ENSG00000130449	ZSWIM6	0	1	0.18297
ENSG00000009694	TENM1	0	1	0.183053
ENSG00000104218	CSPP1	0	1	0.183053
ENSG00000128602	SMO	0	1	0.183102
ENSG00000110077	MS4A6A	0	1	0.183207
ENSG00000165983	PTER	0	1	0.183207
ENSG00000186792	HYAL3	0	1	0.18337
ENSG00000148498	PARD3	0	1	0.183658
ENSG00000010310	GIPR	0	1	0.183718
ENSG00000140265	ZSCAN29	0	1	0.183718
ENSG00000196151	WDSUB1	0	1	0.183718
ENSG00000131778	CHD1L	0	1	0.18374
ENSG00000165953	SERPINA12	0	1	0.183987
ENSG00000164776	PHKG1	0	1	0.18409
ENSG00000083290	ULK2	0	1	0.184167
ENSG00000119703	ZC2HC1C	0	1	0.184182
ENSG00000067842	ATP2B3	0	2	0.184217
ENSG00000122008	POLK	0	1	0.184256
ENSG00000158458	NRG2	0	1	0.184408
ENSG00000137944	KYAT3	0	1	0.184633
ENSG00000178607	ERN1	0	1	0.184703
ENSG00000155975	VPS37A	0	1	0.184775
ENSG00000004866	ST7	0	1	0.184791
ENSG00000172349	IL16	0	1	0.184799
ENSG00000111913	RIPOR2	0	1	0.185312
ENSG00000115850	LCT	0	1	0.185341
ENSG00000135905	DOCK10	0	1	0.185341
ENSG00000140474	ULK3	0	1	0.185375
ENSG00000168447	SCNN1B	0	2	0.185386
ENSG00000165304	MELK	0	1	0.185391
ENSG00000115306	SPTBN1	0	1	0.18543
ENSG00000146233	CYP39A1	0	1	0.185465
ENSG00000138834	MAPK8IP3	0	1	0.185522
ENSG00000189233	NUGGC	0	1	0.185609
ENSG00000005421	PON1	0	1	0.185764
ENSG00000175899	A2M	0	1	0.185764
ENSG00000258839	MC1R	0	1	0.18583
ENSG00000173612	GPRC6A	0	1	0.185835
ENSG00000172005	MAL	0	1	0.185929
ENSG00000134917	ADAMTS8	0	1	0.185965
ENSG00000146809	ASB15	0	1	0.185965
ENSG00000085832	EPS15	0	1	0.185984
ENSG00000135828	RNASEL	1	22	0.186033
ENSG00000106536	POU6F2	0	1	0.186045
ENSG00000120324	PCDHB10	0	1	0.186057
ENSG00000204291	COL15A1	0	2	0.186107
ENSG00000125651	GTF2F1	0	1	0.186108
ENSG00000149292	TTC12	0	1	0.186108
ENSG00000114904	NEK4	0	1	0.186175
ENSG00000187391	MAGI2	0	1	0.186184
ENSG00000241935	HOGA1	0	1	0.186313
ENSG00000196739	COL27A1	0	1	0.186604
ENSG00000215041	NEURL4	0	1	0.186604
ENSG00000181143	MUC16	0	1	0.186678
ENSG00000100012	SEC14L3	0	1	0.186711
ENSG00000134318	ROCK2	0	1	0.18681
ENSG00000166866	MYO1A	0	1	0.186836
ENSG00000081237	PTPRC	0	1	0.186899
ENSG00000151651	ADAM8	0	1	0.186986
ENSG00000137628	DDX60	0	1	0.18702
ENSG00000066230	SLC9A3	0	1	0.187128
ENSG00000163395	IGFN1	0	2	0.187146
ENSG00000169710	FASN	0	1	0.187253
ENSG00000113555	PCDH12	0	1	0.187288
ENSG00000151718	WWC2	0	1	0.187692
ENSG00000165548	TMEM63C	0	1	0.187692
ENSG00000101333	PLCB4	0	1	0.187984
ENSG00000040933	INPP4A	0	1	0.188047
ENSG00000241404	EGFL8	0	1	0.18806
ENSG00000177675	CD163L1	0	2	0.188138
ENSG00000155096	AZIN1	0	1	0.188389
ENSG00000183208	GDPGP1	0	1	0.188389
ENSG00000116809	ZBTB17	0	2	0.188743
ENSG00000082781	ITGB5	0	1	0.188743
ENSG00000165102	HGSNAT	0	1	0.188743
ENSG00000178385	PLEKHM3	0	1	0.188967
ENSG00000067191	CACNB1	0	1	0.189
ENSG00000188015	S100A3	0	1	0.189
ENSG00000186648	CARMIL3	0	2	0.189014
ENSG00000133135	RNF128	0	1	0.189068
ENSG00000204930	FAM221B	0	1	0.18913
ENSG00000197816	CCDC180	0	1	0.189269
ENSG00000197429	IPP	0	1	0.189381
ENSG00000043143	JADE2	0	1	0.189433
ENSG00000126838	PZP	0	1	0.189554
ENSG00000080189	SLC35C2	0	1	0.189664
ENSG00000119688	ABCD4	0	1	0.189682
ENSG00000134760	DSG1	0	1	0.189682
ENSG00000062822	POLD1	0	1	0.189764
ENSG00000167210	LOXHD1	0	1	0.189861
ENSG00000244474	UGT1A4	0	1	0.190104
ENSG00000078725	BRINP1	0	1	0.190244
ENSG00000154269	ENPP3	0	1	0.190361
ENSG00000144591	GMPPA	0	1	0.190372
ENSG00000159147	DONSON	0	1	0.190372
ENSG00000107890	ANKRD26	0	1	0.190731
ENSG00000108523	RNF167	0	2	0.190785
ENSG00000176715	ACSF3	0	1	0.191047
ENSG00000176986	SEC24C	0	1	0.191047
ENSG00000138741	TRPC3	0	1	0.191055
ENSG00000173744	AGFG1	0	1	0.191101
ENSG00000157703	SVOPL	0	1	0.191164
ENSG00000139970	RTN1	0	1	0.191169
ENSG00000168944	CEP120	0	1	0.191222
ENSG00000099282	TSPAN15	0	1	0.191253
ENSG00000163462	TRIM46	0	1	0.191335
ENSG00000180347	ITPRID1	0	1	0.191546
ENSG00000100266	PACSIN2	0	1	0.191674
ENSG00000175220	ARHGAP1	0	1	0.191674
ENSG00000005471	ABCB4	0	1	0.191714
ENSG00000144711	IQSEC1	0	1	0.191714
ENSG00000159307	SCUBE1	0	1	0.19199
ENSG00000184220	CMSS1	0	1	0.192006
ENSG00000089041	P2RX7	0	1	0.192042
ENSG00000213079	SCAF8	0	1	0.192042
ENSG00000073060	SCARB1	0	1	0.192088
ENSG00000166816	LDHD	0	1	0.192225
ENSG00000012232	EXTL3	0	1	0.192281
ENSG00000082068	WDR70	0	1	0.192281
ENSG00000141449	GREB1L	0	1	0.192597
ENSG00000100628	ASB2	0	1	0.192636
ENSG00000108465	CDK5RAP3	0	1	0.192639
ENSG00000141994	DUS3L	0	1	0.192778
ENSG00000181965	NEUROG1	0	1	0.192778
ENSG00000128928	IVD	0	1	0.19283
ENSG00000134321	RSAD2	0	1	0.19283
ENSG00000015133	CCDC88C	0	2	0.192933
ENSG00000053770	AP5M1	0	1	0.193002
ENSG00000197641	SERPINB13	0	1	0.193058
ENSG00000178015	GPR150	0	1	0.193165
ENSG00000151005	TKTL2	0	1	0.193184
ENSG00000154133	ROBO4	0	1	0.193184
ENSG00000157060	SHCBP1L	0	1	0.19335
ENSG00000138111	MFSD13A	0	1	0.193351
ENSG00000239389	PCDHA13	0	1	0.193351
ENSG00000158055	GRHL3	0	1	0.193435
ENSG00000124491	F13A1	0	1	0.193533
ENSG00000129925	PGAP6	0	1	0.193605
ENSG00000158169	FANCC	0	1	0.193633
ENSG00000173585	CCR9	0	1	0.193633
ENSG00000066455	GOLGA5	0	1	0.193809
ENSG00000204410	MSH5	0	1	0.193809
ENSG00000112902	SEMA5A	0	1	0.193813
ENSG00000185359	HGS	0	1	0.193841
ENSG00000197299	BLM	0	1	0.193854
ENSG00000188522	FAM83G	1	13	0.193898
ENSG00000051341	POLQ	0	2	0.194034
ENSG00000135372	NAT10	0	1	0.194103
ENSG00000188321	ZNF559	0	1	0.194103
ENSG00000141526	SLC16A3	0	1	0.194133
ENSG00000172890	NADSYN1	0	1	0.194197
ENSG00000138131	LOXL4	0	1	0.194263
ENSG00000105127	AKAP8	0	1	0.19432
ENSG00000116852	KIF21B	0	1	0.19432
ENSG00000137776	SLTM	0	1	0.194358
ENSG00000157510	AFAP1L1	0	1	0.194358
ENSG00000139263	LRIG3	0	1	0.194505
ENSG00000041982	TNC	0	1	0.194572
ENSG00000144043	TEX261	0	1	0.19458
ENSG00000136002	ARHGEF4	0	1	0.194605
ENSG00000123977	DAW1	0	1	0.194617
ENSG00000146828	SLC12A9	0	1	0.194617
ENSG00000157107	FCHO2	0	1	0.194617
ENSG00000124067	SLC12A4	0	1	0.194678
ENSG00000062096	ARSF	0	1	0.194684
ENSG00000113407	TARS1	0	1	0.194684
ENSG00000156011	PSD3	0	1	0.194745
ENSG00000196914	ARHGEF12	0	1	0.194788
ENSG00000144821	MYH15	0	1	0.194928
ENSG00000100288	CHKB	0	1	0.19493
ENSG00000149489	ROM1	0	1	0.19493
ENSG00000138073	PREB	0	1	0.194935
ENSG00000129219	PLD2	0	2	0.195162
ENSG00000166391	MOGAT2	0	1	0.195179
ENSG00000165458	INPPL1	0	1	0.195329
ENSG00000092929	UNC13D	0	1	0.195647
ENSG00000163811	WDR43	0	1	0.195654
ENSG00000143851	PTPN7	0	1	0.195667
ENSG00000177728	TMEM94	0	1	0.195667
ENSG00000163625	WDFY3	0	1	0.195778
ENSG00000186431	FCAR	0	1	0.195795
ENSG00000187266	EPOR	0	1	0.195802
ENSG00000011028	MRC2	0	1	0.19588
ENSG00000070371	CLTCL1	0	1	0.195932
ENSG00000139567	ACVRL1	0	1	0.195932
ENSG00000168646	AXIN2	0	1	0.196171
ENSG00000100413	POLR3H	0	1	0.19618
ENSG00000205517	RGL3	0	1	0.196181
ENSG00000156853	ZNF689	0	1	0.19634
ENSG00000105559	PLEKHA4	0	1	0.19641
ENSG00000004939	SLC4A1	0	1	0.196488
ENSG00000049618	ARID1B	0	1	0.196748
ENSG00000128285	MCHR1	0	1	0.196748
ENSG00000148677	ANKRD1	0	1	0.196748
ENSG00000178234	GALNT11	0	1	0.196748
ENSG00000196878	LAMB3	0	1	0.196815
ENSG00000100014	SPECC1L	0	1	0.19691
ENSG00000106344	RBM28	0	1	0.19691
ENSG00000182606	TRAK1	0	1	0.19691
ENSG00000188158	NHS	0	1	0.196965
ENSG00000105186	ANKRD27	0	1	0.197167
ENSG00000108821	COL1A1	0	1	0.197417
ENSG00000119777	TMEM214	0	1	0.197434
ENSG00000107290	SETX	0	1	0.197583
ENSG00000112701	SENP6	0	1	0.197589
ENSG00000166311	SMPD1	0	1	0.197611
ENSG00000198752	CDC42BPB	0	1	0.197611
ENSG00000171467	ZNF318	0	1	0.197783
ENSG00000103056	SMPD3	0	1	0.19788
ENSG00000121297	TSHZ3	0	1	0.19788
ENSG00000188385	JAKMIP3	0	1	0.19788
ENSG00000101846	STS	0	1	0.198031
ENSG00000119906	SLF2	0	1	0.198031
ENSG00000103404	USP31	0	1	0.198236
ENSG00000090905	TNRC6A	0	1	0.198273
ENSG00000139344	AMDHD1	0	1	0.198273
ENSG00000139174	PRICKLE1	0	1	0.198295
ENSG00000100867	DHRS2	0	2	0.198301
ENSG00000075275	CELSR1	1	23	0.19831
ENSG00000158863	FAM160B2	0	1	0.198314
ENSG00000152527	PLEKHH2	0	1	0.198419
ENSG00000168907	PLA2G4F	0	1	0.198625
ENSG00000169169	CPT1C	0	1	0.198727
ENSG00000146856	AGBL3	0	2	0.198734
ENSG00000163870	TPRA1	0	1	0.198735
ENSG00000183864	TOB2	0	1	0.19897
ENSG00000158941	CCAR2	0	1	0.198985
ENSG00000143164	DCAF6	0	1	0.19908
ENSG00000164190	NIPBL	0	1	0.19908
ENSG00000131944	FAAP24	0	1	0.199223
ENSG00000168542	COL3A1	0	1	0.199422
ENSG00000175283	DOLK	0	1	0.199422
ENSG00000110422	HIPK3	0	1	0.199424
ENSG00000162669	HFM1	0	1	0.199491
ENSG00000179776	CDH5	0	1	0.199569
ENSG00000010292	NCAPD2	0	1	0.199642
ENSG00000189184	PCDH18	0	1	0.199642
ENSG00000121578	B4GALT4	0	1	0.199712
ENSG00000137204	SLC22A7	0	1	0.199771
ENSG00000142235	LMTK3	0	1	0.199771
ENSG00000162777	DENND2D	0	1	0.199771
ENSG00000110756	HPS5	0	1	0.199836
ENSG00000119969	HELLS	0	1	0.199836
ENSG00000112893	MAN2A1	0	1	0.199847
ENSG00000170523	KRT83	0	1	0.200007
ENSG00000100612	DHRS7	0	1	0.200076
ENSG00000151093	OXSM	0	1	0.200076
ENSG00000174197	MGA	0	2	0.200226
ENSG00000144566	RAB5A	0	1	0.200311
ENSG00000079257	LXN	0	1	0.200318
ENSG00000204634	TBC1D8	0	1	0.20042
ENSG00000106829	TLE4	0	1	0.200532
ENSG00000198825	INPP5F	0	1	0.200552
ENSG00000084693	AGBL5	0	1	0.200616
ENSG00000140443	IGF1R	0	1	0.20064
ENSG00000108244	KRT23	0	1	0.200675
ENSG00000140323	DISP2	0	1	0.200675
ENSG00000181191	PJA1	0	1	0.200797
ENSG00000109133	TMEM33	0	1	0.200818
ENSG00000114656	CFAP92	0	1	0.200818
ENSG00000139636	LMBR1L	0	1	0.200818
ENSG00000122477	LRRC39	0	1	0.200823
ENSG00000120341	SEC16B	0	2	0.200869
ENSG00000164099	PRSS12	0	1	0.200922
ENSG00000164318	EGFLAM	0	1	0.201073
ENSG00000204764	RANBP17	0	1	0.201082
ENSG00000140451	PIF1	0	1	0.201093
ENSG00000186496	ZNF396	0	1	0.20111
ENSG00000075568	TMEM131	0	2	0.201343
ENSG00000187908	DMBT1	0	1	0.201408
ENSG00000040199	PHLPP2	0	2	0.201478
ENSG00000123989	CHPF	0	1	0.201484
ENSG00000064886	CHI3L2	0	1	0.201496
ENSG00000171169	NAIF1	0	1	0.201496
ENSG00000213614	HEXA	0	1	0.201496
ENSG00000101336	HCK	0	1	0.201751
ENSG00000126001	CEP250	0	1	0.201977
ENSG00000181963	OR52K2	0	1	0.201999
ENSG00000063761	ADCK1	0	1	0.202246
ENSG00000101310	SEC23B	0	2	0.202285
ENSG00000129467	ADCY4	0	2	0.202299
ENSG00000172987	HPSE2	0	1	0.202339
ENSG00000142623	PADI1	0	1	0.202408
ENSG00000172244	C5orf34	0	1	0.202408
ENSG00000122778	KIAA1549	0	1	0.202464
ENSG00000185567	AHNAK2	0	1	0.202516
ENSG00000173239	LIPM	0	1	0.202559
ENSG00000113119	TMCO6	0	1	0.20292
ENSG00000178175	ZNF366	0	1	0.202938
ENSG00000008311	AASS	0	2	0.203233
ENSG00000118514	ALDH8A1	0	1	0.203418
ENSG00000167881	SRP68	0	1	0.203418
ENSG00000205978	NYNRIN	0	2	0.203624
ENSG00000068781	STON1-GTF2A1L	0	2	0.203937
ENSG00000115275	MOGS	0	1	0.203942
ENSG00000142552	RCN3	0	1	0.203984
ENSG00000169607	CKAP2L	0	1	0.204007
ENSG00000103174	NAGPA	0	1	0.204063
ENSG00000135205	CCDC146	0	1	0.204332
ENSG00000100678	SLC8A3	0	1	0.204465
ENSG00000131023	LATS1	0	1	0.204465
ENSG00000185115	NSMCE3	0	1	0.20465
ENSG00000132141	CCT6B	0	1	0.204765
ENSG00000169967	MAP3K2	0	1	0.204765
ENSG00000112339	HBS1L	0	1	0.20481
ENSG00000166143	PPP1R14D	0	1	0.204913
ENSG00000177666	PNPLA2	0	1	0.204913
ENSG00000130985	UBA1	0	1	0.204914
ENSG00000134531	EMP1	0	1	0.204983
ENSG00000186513	OR9Q2	0	1	0.204983
ENSG00000185838	GNB1L	0	1	0.205
ENSG00000089250	NOS1	0	1	0.205066
ENSG00000163781	TOPBP1	0	2	0.205341
ENSG00000165494	PCF11	0	2	0.205381
ENSG00000149571	KIRREL3	0	1	0.205414
ENSG00000135315	CEP162	0	1	0.205455
ENSG00000079691	CARMIL1	0	1	0.205492
ENSG00000140939	NOL3	0	1	0.205497
ENSG00000134697	GNL2	0	1	0.205575
ENSG00000178222	RNF212	0	1	0.205684
ENSG00000198300	PEG3	0	1	0.205746
ENSG00000011201	ANOS1	0	1	0.205786
ENSG00000189181	OR14I1	0	1	0.205786
ENSG00000135966	TGFBRAP1	0	1	0.205803
ENSG00000102904	TSNAXIP1	0	2	0.205863
ENSG00000121053	EPX	0	2	0.205945
ENSG00000137766	UNC13C	0	2	0.205946
ENSG00000171824	EXOSC10	0	1	0.205959
ENSG00000093009	CDC45	0	1	0.206027
ENSG00000114054	PCCB	0	1	0.206486
ENSG00000160294	MCM3AP	0	1	0.206486
ENSG00000128833	MYO5C	0	1	0.206496
ENSG00000139697	SBNO1	0	1	0.206502
ENSG00000059588	TARBP1	0	1	0.206504
ENSG00000118960	HS1BP3	0	1	0.206539
ENSG00000116035	VAX2	0	1	0.206697
ENSG00000145147	SLIT2	0	1	0.206697
ENSG00000186866	POFUT2	0	1	0.206697
ENSG00000116731	PRDM2	0	2	0.20688
ENSG00000144857	BOC	0	1	0.207142
ENSG00000154099	DNAAF1	0	1	0.207241
ENSG00000175311	ANKS4B	0	2	0.207246
ENSG00000154265	ABCA5	0	2	0.207333
ENSG00000133812	SBF2	0	1	0.20737
ENSG00000126583	PRKCG	0	1	0.207426
ENSG00000160767	FAM189B	0	1	0.207537
ENSG00000185028	LRRC14B	0	1	0.207832
ENSG00000112200	ZNF451	0	1	0.208088
ENSG00000167674	HDGFL2	0	1	0.208088
ENSG00000170426	SDR9C7	0	1	0.208088
ENSG00000170289	CNGB3	0	1	0.208113
ENSG00000100433	KCNK10	0	1	0.208133
ENSG00000117154	IGSF21	0	1	0.208133
ENSG00000157379	DHRS1	0	1	0.208146
ENSG00000170454	KRT75	0	1	0.208146
ENSG00000159625	DRC7	0	1	0.208171
ENSG00000148803	FUOM	0	1	0.208251
ENSG00000178826	TMEM139	0	1	0.208251
ENSG00000198208	RPS6KL1	0	1	0.208251
ENSG00000126453	BCL2L12	0	1	0.208362
ENSG00000144712	CAND2	0	1	0.20841
ENSG00000148773	MKI67	0	2	0.208448
ENSG00000013288	MAN2B2	0	1	0.208464
ENSG00000067369	TP53BP1	0	1	0.208524
ENSG00000162526	TSSK3	0	1	0.208536
ENSG00000128886	ELL3	0	1	0.208559
ENSG00000159231	CBR3	0	1	0.208588
ENSG00000126231	PROZ	0	1	0.208723
ENSG00000136811	ODF2	0	1	0.208727
ENSG00000135299	ANKRD6	0	1	0.208834
ENSG00000153827	TRIP12	0	1	0.208834
ENSG00000003987	MTMR7	0	1	0.20888
ENSG00000198670	LPA	0	1	0.209023
ENSG00000103540	CCP110	0	1	0.2091
ENSG00000146530	VWDE	0	2	0.209122
ENSG00000084754	HADHA	0	1	0.209127
ENSG00000099381	SETD1A	0	1	0.209127
ENSG00000040341	STAU2	0	1	0.20939
ENSG00000172046	USP19	0	1	0.209414
ENSG00000187260	WDR86	0	1	0.209492
ENSG00000176531	PHLDB3	0	2	0.209515
ENSG00000102362	SYTL4	0	1	0.20967
ENSG00000135596	MICAL1	0	2	0.209738
ENSG00000182511	FES	0	2	0.209807
ENSG00000070610	GBA2	0	1	0.2099
ENSG00000137573	SULF1	0	1	0.2099
ENSG00000109062	SLC9A3R1	0	1	0.209928
ENSG00000114857	NKTR	0	1	0.210075
ENSG00000143627	PKLR	0	1	0.210075
ENSG00000166529	ZSCAN21	0	1	0.210075
ENSG00000116299	ELAPOR1	0	1	0.210195
ENSG00000005187	ACSM3	0	1	0.210282
ENSG00000033867	SLC4A7	0	1	0.210282
ENSG00000108559	NUP88	0	2	0.210325
ENSG00000197213	ZSCAN5B	0	1	0.210367
ENSG00000133115	STOML3	0	1	0.210624
ENSG00000156170	NDUFAF6	0	2	0.21069
ENSG00000151208	DLG5	0	2	0.210718
ENSG00000183347	GBP6	0	1	0.210793
ENSG00000124574	ABCC10	0	1	0.210886
ENSG00000088854	C20orf194	0	1	0.210925
ENSG00000129946	SHC2	0	1	0.210925
ENSG00000118369	USP35	0	2	0.211004
ENSG00000130158	DOCK6	0	2	0.211115
ENSG00000109625	CPZ	0	1	0.211118
ENSG00000064933	PMS1	0	1	0.21129
ENSG00000119509	INVS	0	1	0.21129
ENSG00000164171	ITGA2	0	1	0.21129
ENSG00000172748	ZNF596	0	1	0.211391
ENSG00000122218	COPA	0	1	0.21147
ENSG00000160218	TRAPPC10	0	1	0.211703
ENSG00000173599	PC	0	2	0.211811
ENSG00000164675	IQUB	0	1	0.211824
ENSG00000104687	GSR	0	1	0.212001
ENSG00000174292	TNK1	0	1	0.212002
ENSG00000198765	SYCP1	0	1	0.212034
ENSG00000163481	RNF25	0	2	0.212412
ENSG00000166450	PRTG	0	2	0.212475
ENSG00000070018	LRP6	0	1	0.212492
ENSG00000029534	ANK1	0	1	0.2125
ENSG00000189079	ARID2	0	2	0.212559
ENSG00000198730	CTR9	0	1	0.212649
ENSG00000180182	MED14	0	1	0.212659
ENSG00000151655	ITIH2	0	2	0.212673
ENSG00000137802	MAPKBP1	0	1	0.212674
ENSG00000089472	HEPH	0	1	0.212947
ENSG00000159166	LAD1	0	1	0.213032
ENSG00000172493	AFF1	0	2	0.213109
ENSG00000179104	TMTC2	0	1	0.213114
ENSG00000072201	LNX1	0	1	0.213162
ENSG00000132182	NUP210	0	1	0.213162
ENSG00000196335	STK31	0	1	0.213162
ENSG00000157613	CREB3L1	0	1	0.213287
ENSG00000183876	ARSI	0	1	0.213325
ENSG00000064218	DMRT3	0	1	0.21346
ENSG00000257365	FNTB	0	1	0.2135
ENSG00000241945	PWP2	0	1	0.213518
ENSG00000095564	BTAF1	0	1	0.213603
ENSG00000149346	SLX4IP	0	1	0.213603
ENSG00000077097	TOP2B	0	1	0.213621
ENSG00000050820	BCAR1	0	1	0.213717
ENSG00000095397	WHRN	0	2	0.213784
ENSG00000105289	TJP3	0	2	0.213868
ENSG00000105357	MYH14	0	2	0.21392
ENSG00000103222	ABCC1	0	1	0.21428
ENSG00000121764	HCRTR1	0	1	0.214373
ENSG00000137073	UBAP2	0	1	0.214373
ENSG00000160447	PKN3	0	1	0.21441
ENSG00000173575	CHD2	0	1	0.21441
ENSG00000152578	GRIA4	0	1	0.21442
ENSG00000155085	AK9	0	1	0.21442
ENSG00000171988	JMJD1C	0	1	0.21442
ENSG00000072832	CRMP1	0	1	0.214506
ENSG00000147432	CHRNB3	0	1	0.214832
ENSG00000138085	ATRAID	0	1	0.214862
ENSG00000007202	KIAA0100	0	2	0.214869
ENSG00000117114	ADGRL2	0	2	0.214896
ENSG00000165801	ARHGEF40	0	2	0.215046
ENSG00000119705	SLIRP	0	1	0.215205
ENSG00000004700	RECQL	0	1	0.215211
ENSG00000100445	SDR39U1	0	1	0.215315
ENSG00000100503	NIN	0	1	0.215315
ENSG00000157766	ACAN	0	1	0.21554
ENSG00000086232	EIF2AK1	0	2	0.215693
ENSG00000122971	ACADS	0	1	0.215779
ENSG00000182325	FBXL6	0	1	0.215819
ENSG00000012048	BRCA1	0	2	0.215899
ENSG00000074370	ATP2A3	0	2	0.216087
ENSG00000172671	ZFAND4	0	1	0.216162
ENSG00000144589	STK11IP	0	1	0.216162
ENSG00000038427	VCAN	0	1	0.216277
ENSG00000091622	PITPNM3	0	1	0.216277
ENSG00000142186	SCYL1	0	1	0.216281
ENSG00000167632	TRAPPC9	0	2	0.216376
ENSG00000142619	PADI3	0	2	0.21659
ENSG00000164880	INTS1	0	2	0.216649
ENSG00000165383	LRRC18	0	1	0.216673
ENSG00000175920	DOK7	0	1	0.216694
ENSG00000171456	ASXL1	0	1	0.216842
ENSG00000173848	NET1	0	1	0.216842
ENSG00000109927	TECTA	0	1	0.216974
ENSG00000172081	MOB3A	0	2	0.216976
ENSG00000170471	RALGAPB	0	2	0.217013
ENSG00000044090	CUL7	0	1	0.217118
ENSG00000104093	DMXL2	0	2	0.217315
ENSG00000118946	PCDH17	0	2	0.217477
ENSG00000160796	NBEAL2	0	2	0.217515
ENSG00000204536	CCHCR1	0	2	0.217549
ENSG00000112592	TBP	0	2	0.217629
ENSG00000159363	ATP13A2	0	1	0.217745
ENSG00000140950	MEAK7	0	1	0.217812
ENSG00000171823	FBXL14	0	1	0.217812
ENSG00000167925	GHDC	0	1	0.217876
ENSG00000172578	KLHL6	0	1	0.217876
ENSG00000149403	GRIK4	0	1	0.217903
ENSG00000102893	PHKB	0	2	0.218254
ENSG00000117868	ESYT2	0	2	0.218282
ENSG00000162267	ITIH3	0	2	0.218872
ENSG00000143842	SOX13	0	2	0.21898
ENSG00000153956	CACNA2D1	0	2	0.219029
ENSG00000136003	ISCU	0	1	0.219279
ENSG00000132300	PTCD3	0	2	0.219362
ENSG00000134815	DHX34	0	1	0.219372
ENSG00000169436	COL22A1	0	2	0.219694
ENSG00000143222	UFC1	0	1	0.219843
ENSG00000198836	OPA1	0	1	0.219843
ENSG00000160145	KALRN	0	2	0.219896
ENSG00000123213	NLN	0	2	0.219994
ENSG00000188878	FBF1	0	2	0.220008
ENSG00000146197	SCUBE3	0	2	0.220172
ENSG00000087303	NID2	0	1	0.220292
ENSG00000100504	PYGL	0	2	0.220446
ENSG00000179709	NLRP8	0	1	0.220724
ENSG00000138095	LRPPRC	0	1	0.22084
ENSG00000124215	CDH26	0	2	0.221181
ENSG00000213892	CEACAM16	0	1	0.221252
ENSG00000042062	RIPOR3	0	2	0.222052
ENSG00000168000	BSCL2	0	2	0.222084
ENSG00000118762	PKD2	0	2	0.22224
ENSG00000147684	NDUFB9	0	1	0.222508
ENSG00000159387	IRX6	0	1	0.222508
ENSG00000163357	DCST1	0	1	0.222508
ENSG00000143373	ZNF687	0	1	0.22253
ENSG00000156218	ADAMTSL3	0	2	0.222567
ENSG00000137807	KIF23	0	1	0.222691
ENSG00000179094	PER1	0	1	0.222867
ENSG00000064687	ABCA7	0	2	0.223016
ENSG00000069018	TRPC7	0	1	0.223141
ENSG00000163646	CLRN1	0	2	0.223649
ENSG00000143569	UBAP2L	0	1	0.223886
ENSG00000185269	NOTUM	0	1	0.223886
ENSG00000090924	PLEKHG2	0	1	0.223929
ENSG00000124126	PREX1	0	2	0.223933
ENSG00000005448	WDR54	0	1	0.224062
ENSG00000110060	PUS3	0	1	0.224062
ENSG00000152767	FARP1	0	1	0.224062
ENSG00000196367	TRRAP	0	1	0.224162
ENSG00000104731	KLHDC4	0	2	0.224283
ENSG00000124831	LRRFIP1	0	1	0.224741
ENSG00000100767	PAPLN	0	1	0.224786
ENSG00000172728	FUT10	0	2	0.224951
ENSG00000006283	CACNA1G	0	2	0.225006
ENSG00000130635	COL5A1	0	2	0.225307
ENSG00000075420	FNDC3B	0	1	0.225723
ENSG00000101868	POLA1	0	1	0.225723
ENSG00000075391	RASAL2	0	1	0.225789
ENSG00000134962	KLB	0	2	0.225798
ENSG00000105732	ZNF574	0	2	0.22591
ENSG00000134871	COL4A2	0	1	0.225974
ENSG00000134186	PRPF38B	0	2	0.225978
ENSG00000122417	ODF2L	0	2	0.225991
ENSG00000157637	SLC38A10	0	1	0.22617
ENSG00000114416	FXR1	0	1	0.226178
ENSG00000005483	KMT2E	0	2	0.226323
ENSG00000090615	GOLGA3	0	2	0.226423
ENSG00000117425	PTCH2	0	2	0.22665
ENSG00000116198	CEP104	0	1	0.226816
ENSG00000131373	HACL1	0	1	0.22695
ENSG00000076258	FMO4	0	1	0.227123
ENSG00000198785	GRIN3A	0	2	0.227222
ENSG00000004846	ABCB5	0	2	0.227539
ENSG00000139144	PIK3C2G	0	1	0.22765
ENSG00000138119	MYOF	0	2	0.227683
ENSG00000143850	PLEKHA6	0	2	0.227691
ENSG00000100280	AP1B1	0	1	0.227757
ENSG00000065328	MCM10	0	1	0.227803
ENSG00000010282	HHATL	0	1	0.227835
ENSG00000173210	ABLIM3	0	1	0.22802
ENSG00000120820	GLT8D2	0	1	0.22806
ENSG00000146426	TIAM2	0	2	0.228073
ENSG00000126803	HSPA2	0	1	0.228131
ENSG00000203857	HSD3B1	0	1	0.228218
ENSG00000186862	PDZD7	0	2	0.228555
ENSG00000100106	TRIOBP	0	1	0.228811
ENSG00000133392	MYH11	0	2	0.22929
ENSG00000059691	GATB	0	1	0.22952
ENSG00000066777	ARFGEF1	0	2	0.229541
ENSG00000103942	HOMER2	0	2	0.229706
ENSG00000152939	MARVELD2	0	1	0.229811
ENSG00000181803	OR6S1	0	1	0.229938
ENSG00000121988	ZRANB3	0	1	0.230048
ENSG00000087884	AAMDC	0	1	0.230086
ENSG00000156650	KAT6B	0	2	0.230431
ENSG00000089177	KIF16B	0	2	0.230643
ENSG00000213445	SIPA1	0	1	0.230968
ENSG00000116991	SIPA1L2	0	2	0.230971
ENSG00000136603	SKIL	0	1	0.231057
ENSG00000175463	TBC1D10C	0	1	0.231127
ENSG00000107554	DNMBP	0	1	0.231235
ENSG00000132436	FIGNL1	0	1	0.231236
ENSG00000103168	TAF1C	0	1	0.231298
ENSG00000198026	ZNF335	0	2	0.231567
ENSG00000117143	UAP1	0	2	0.23163
ENSG00000180921	FAM83H	0	2	0.231646
ENSG00000139908	TSSK4	0	2	0.231723
ENSG00000178921	PFAS	0	2	0.231739
ENSG00000171345	KRT19	0	2	0.231763
ENSG00000136383	ALPK3	0	2	0.231817
ENSG00000052841	TTC17	0	1	0.231844
ENSG00000135365	PHF21A	0	1	0.231844
ENSG00000065361	ERBB3	0	2	0.231907
ENSG00000141052	MYOCD	0	2	0.231932
ENSG00000242419	PCDHGC4	0	1	0.231994
ENSG00000127914	AKAP9	0	2	0.232387
ENSG00000165392	WRN	0	1	0.232426
ENSG00000235718	MFRP	0	2	0.232438
ENSG00000170476	MZB1	0	1	0.232494
ENSG00000175662	TOM1L2	0	1	0.232494
ENSG00000135018	UBQLN1	0	2	0.23262
ENSG00000072195	SPEG	0	1	0.232769
ENSG00000076650	GPATCH1	0	2	0.23284
ENSG00000121210	TMEM131L	0	1	0.23284
ENSG00000113971	NPHP3	0	2	0.232922
ENSG00000065675	PRKCQ	0	1	0.232954
ENSG00000160703	NLRX1	0	1	0.233074
ENSG00000172940	SLC22A13	0	1	0.233089
ENSG00000198722	UNC13B	0	1	0.233143
ENSG00000113716	HMGXB3	0	1	0.233496
ENSG00000139618	BRCA2	0	1	0.233524
ENSG00000121933	TMIGD3	0	1	0.23355
ENSG00000147255	IGSF1	0	1	0.233558
ENSG00000173442	EHBP1L1	0	2	0.233601
ENSG00000157106	SMG1	0	2	0.233612
ENSG00000103932	RPAP1	0	1	0.233786
ENSG00000106100	NOD1	0	1	0.233786
ENSG00000162302	RPS6KA4	0	2	0.234246
ENSG00000115368	WDR75	0	2	0.23445
ENSG00000171944	OR52A5	0	2	0.234528
ENSG00000008869	HEATR5B	0	2	0.234528
ENSG00000167107	ACSF2	0	1	0.234541
ENSG00000132321	IQCA1	0	1	0.23465
ENSG00000166783	MARF1	0	2	0.23468
ENSG00000243207	PPAN-P2RY11	0	2	0.23471
ENSG00000176200	OR4D11	0	1	0.234809
ENSG00000177984	LCN15	0	1	0.23498
ENSG00000130856	ZNF236	0	1	0.235024
ENSG00000188163	FAM166A	0	1	0.235024
ENSG00000103742	IGDCC4	0	1	0.235062
ENSG00000225968	ELFN1	0	1	0.235124
ENSG00000106415	GLCCI1	0	2	0.235195
ENSG00000171495	MROH2B	0	2	0.235257
ENSG00000172456	FGGY	0	3	0.235503
ENSG00000163728	TTC14	0	2	0.235505
ENSG00000100601	ALKBH1	0	1	0.235551
ENSG00000188157	AGRN	0	2	0.236135
ENSG00000056586	RC3H2	0	2	0.236268
ENSG00000144285	SCN1A	0	2	0.236304
ENSG00000187800	PEAR1	0	1	0.236633
ENSG00000164031	DNAJB14	0	1	0.236653
ENSG00000060566	CREB3L3	0	2	0.236706
ENSG00000171451	DSEL	0	1	0.236897
ENSG00000130338	TULP4	0	3	0.237189
ENSG00000184916	JAG2	0	1	0.237212
ENSG00000139767	SRRM4	0	1	0.237285
ENSG00000172409	CLP1	0	1	0.237285
ENSG00000187634	SAMD11	0	2	0.23731
ENSG00000116983	HPCAL4	0	1	0.237371
ENSG00000077616	NAALAD2	0	1	0.237374
ENSG00000122034	GTF3A	0	1	0.237374
ENSG00000165406	MARCHF8	0	1	0.237374
ENSG00000097096	SYDE2	0	2	0.237732
ENSG00000048028	USP28	0	2	0.237787
ENSG00000069020	MAST4	0	2	0.238
ENSG00000072121	ZFYVE26	0	2	0.238286
ENSG00000188906	LRRK2	0	1	0.238415
ENSG00000168487	BMP1	0	1	0.238485
ENSG00000122786	CALD1	0	2	0.238566
ENSG00000073111	MCM2	0	2	0.239247
ENSG00000089154	GCN1	0	1	0.239294
ENSG00000168077	SCARA3	0	1	0.239294
ENSG00000080815	PSEN1	0	1	0.239338
ENSG00000068650	ATP11A	0	1	0.239584
ENSG00000064309	CDON	0	1	0.239679
ENSG00000092200	RPGRIP1	0	1	0.239821
ENSG00000103460	TOX3	0	1	0.239938
ENSG00000177868	SVBP	0	1	0.239938
ENSG00000140521	POLG	0	2	0.240144
ENSG00000122870	BICC1	0	2	0.240251
ENSG00000171804	WDR87	0	1	0.240335
ENSG00000171962	DRC3	0	2	0.240386
ENSG00000166147	FBN1	0	2	0.240431
ENSG00000142347	MYO1F	0	1	0.240607
ENSG00000100263	RHBDD3	0	2	0.240631
ENSG00000172497	ACOT12	0	1	0.240719
ENSG00000168014	C2CD3	0	2	0.240743
ENSG00000125447	GGA3	0	1	0.240814
ENSG00000132837	DMGDH	0	1	0.240814
ENSG00000135953	MFSD9	0	1	0.240814
ENSG00000143379	SETDB1	0	1	0.240814
ENSG00000101049	SGK2	0	1	0.240946
ENSG00000116962	NID1	0	1	0.241039
ENSG00000155846	PPARGC1B	0	2	0.241541
ENSG00000129354	AP1M2	0	1	0.241687
ENSG00000136828	RALGPS1	0	1	0.241718
ENSG00000103426	CORO7-PAM16	0	2	0.24173
ENSG00000155792	DEPTOR	0	2	0.242041
ENSG00000123454	DBH	0	2	0.24205
ENSG00000100359	SGSM3	0	1	0.242107
ENSG00000157353	FCSK	0	2	0.242399
ENSG00000100813	ACIN1	0	1	0.24244
ENSG00000164741	DLC1	0	2	0.242555
ENSG00000120899	PTK2B	0	1	0.242847
ENSG00000186231	KLHL32	0	2	0.242909
ENSG00000106331	PAX4	0	1	0.24315
ENSG00000168263	KCNV2	0	1	0.24315
ENSG00000084072	PPIE	0	1	0.243192
ENSG00000132155	RAF1	0	1	0.243192
ENSG00000143554	SLC27A3	0	2	0.24321
ENSG00000135424	ITGA7	0	2	0.243248
ENSG00000137872	SEMA6D	0	2	0.243326
ENSG00000169871	TRIM56	0	2	0.243359
ENSG00000103888	CEMIP	0	2	0.243771
ENSG00000197102	DYNC1H1	0	3	0.244129
ENSG00000136869	TLR4	0	1	0.244694
ENSG00000065883	CDK13	0	1	0.244786
ENSG00000145649	GZMA	0	2	0.244811
ENSG00000151491	EPS8	0	3	0.244953
ENSG00000177103	DSCAML1	0	2	0.244979
ENSG00000159069	FBXW5	0	2	0.245128
ENSG00000133687	TMTC1	0	1	0.245523
ENSG00000143442	POGZ	0	1	0.245523
ENSG00000171453	POLR1C	0	1	0.245523
ENSG00000139044	B4GALNT3	0	2	0.245565
ENSG00000124191	TOX2	0	1	0.245686
ENSG00000188559	RALGAPA2	0	3	0.24569
ENSG00000130396	AFDN	0	2	0.246366
ENSG00000137492	THAP12	0	2	0.246534
ENSG00000004399	PLXND1	0	1	0.246542
ENSG00000196557	CACNA1H	0	2	0.246556
ENSG00000041802	LSG1	0	2	0.24659
ENSG00000121486	TRMT1L	0	1	0.246733
ENSG00000128567	PODXL	0	2	0.246779
ENSG00000110274	CEP164	0	1	0.246885
ENSG00000132692	BCAN	0	2	0.246908
ENSG00000164164	OTUD4	0	2	0.246919
ENSG00000187122	SLIT1	0	1	0.247002
ENSG00000169067	ACTBL2	0	1	0.247193
ENSG00000105875	WDR91	0	2	0.247207
ENSG00000162398	LEXM	0	2	0.247458
ENSG00000189337	KAZN	0	2	0.247541
ENSG00000197444	OGDHL	0	2	0.247611
ENSG00000073711	PPP2R3A	0	1	0.247699
ENSG00000165118	C9orf64	0	1	0.247699
ENSG00000008226	DLEC1	0	1	0.24791
ENSG00000132773	TOE1	0	1	0.24791
ENSG00000129250	KIF1C	0	2	0.247932
ENSG00000166813	KIF7	0	1	0.248179
ENSG00000185100	ADSS1	0	1	0.248514
ENSG00000118965	WDR35	0	2	0.248624
ENSG00000137474	MYO7A	0	2	0.248683
ENSG00000015532	XYLT2	0	1	0.2487
ENSG00000162337	LRP5	0	2	0.248723
ENSG00000109832	DDX25	0	2	0.248875
ENSG00000102908	NFAT5	0	1	0.248931
ENSG00000131386	GALNT15	0	1	0.248931
ENSG00000180785	OR51E1	0	2	0.24914
ENSG00000120688	WBP4	0	2	0.249203
ENSG00000196475	GK2	0	2	0.249256
ENSG00000124587	PEX6	0	3	0.249414
ENSG00000100297	MCM5	0	1	0.24983
ENSG00000165219	GAPVD1	0	1	0.250009
ENSG00000173145	NOC3L	0	1	0.250127
ENSG00000198743	SLC5A3	0	1	0.250426
ENSG00000116604	MEF2D	0	2	0.250496
ENSG00000107736	CDH23	0	2	0.250577
ENSG00000163749	CCDC158	0	2	0.250671
ENSG00000055609	KMT2C	0	1	0.250781
ENSG00000130475	FCHO1	0	2	0.25081
ENSG00000197629	MPEG1	0	2	0.25088
ENSG00000188549	CCDC9B	0	3	0.25121
ENSG00000144504	ANKMY1	0	2	0.25171
ENSG00000025039	RRAGD	0	1	0.252175
ENSG00000143228	NUF2	0	2	0.252627
ENSG00000140943	MBTPS1	0	1	0.25279
ENSG00000157601	MX1	0	1	0.252952
ENSG00000146282	RARS2	0	1	0.253045
ENSG00000125844	RRBP1	0	2	0.253048
ENSG00000107611	CUBN	0	2	0.253211
ENSG00000142733	MAP3K6	0	2	0.25331
ENSG00000196119	OR8A1	0	2	0.253323
ENSG00000030066	NUP160	0	2	0.253596
ENSG00000123992	DNPEP	0	1	0.25361
ENSG00000215018	COL28A1	0	2	0.253693
ENSG00000186010	NDUFA13	0	1	0.254072
ENSG00000169330	MINAR1	0	1	0.254203
ENSG00000100731	PCNX1	0	2	0.254328
ENSG00000106772	PRUNE2	0	3	0.254487
ENSG00000182197	EXT1	0	1	0.254623
ENSG00000154122	ANKH	0	1	0.254927
ENSG00000178031	ADAMTSL1	0	2	0.25514
ENSG00000136813	ECPAS	0	2	0.255215
ENSG00000105227	PRX	0	1	0.255692
ENSG00000118898	PPL	0	2	0.255756
ENSG00000111145	ELK3	0	1	0.256046
ENSG00000173908	KRT28	0	2	0.256062
ENSG00000074755	ZZEF1	0	2	0.256082
ENSG00000132670	PTPRA	0	1	0.256353
ENSG00000066923	STAG3	0	1	0.256419
ENSG00000109111	SUPT6H	0	1	0.25653
ENSG00000163520	FBLN2	0	1	0.256573
ENSG00000163931	TKT	0	1	0.256573
ENSG00000127831	VIL1	0	2	0.256583
ENSG00000182557	SPNS3	0	1	0.256701
ENSG00000025770	NCAPH2	0	2	0.256811
ENSG00000164078	MST1R	0	2	0.256967
ENSG00000124784	RIOK1	0	2	0.257205
ENSG00000167880	EVPL	0	2	0.257274
ENSG00000142102	PGGHG	0	1	0.25736
ENSG00000134160	TRPM1	0	2	0.25812
ENSG00000006282	SPATA20	0	2	0.259064
ENSG00000179593	ALOX15B	0	2	0.25936
ENSG00000103966	EHD4	0	1	0.259384
ENSG00000152242	C18orf25	0	1	0.259384
ENSG00000099991	CABIN1	0	2	0.259484
ENSG00000145194	ECE2	0	3	0.259514
ENSG00000153002	CPB1	0	1	0.259954
ENSG00000197548	ATG7	0	2	0.260001
ENSG00000110344	UBE4A	0	1	0.260238
ENSG00000138615	CILP	0	2	0.260532
ENSG00000177169	ULK1	0	1	0.260585
ENSG00000196136	SERPINA3	0	2	0.260886
ENSG00000094914	AAAS	0	1	0.260984
ENSG00000110713	NUP98	0	2	0.261121
ENSG00000119599	DCAF4	0	3	0.261354
ENSG00000153066	TXNDC11	0	2	0.261543
ENSG00000129566	TEP1	0	3	0.26192
ENSG00000196689	TRPV1	0	2	0.262093
ENSG00000047249	ATP6V1H	0	2	0.262311
ENSG00000160323	ADAMTS13	0	2	0.262364
ENSG00000127124	HIVEP3	0	3	0.262411
ENSG00000044459	CNTLN	0	2	0.263272
ENSG00000142606	MMEL1	0	3	0.263552
ENSG00000101680	LAMA1	0	2	0.263571
ENSG00000180113	TDRD6	0	1	0.263901
ENSG00000103319	EEF2K	0	1	0.26398
ENSG00000142627	EPHA2	0	3	0.264043
ENSG00000106571	GLI3	0	3	0.264627
ENSG00000138193	PLCE1	0	2	0.265418
ENSG00000111266	DUSP16	0	1	0.265955
ENSG00000066933	MYO9A	0	2	0.26696
ENSG00000198853	RUSC2	0	3	0.26704
ENSG00000112659	CUL9	0	2	0.267066
ENSG00000047644	WWC3	0	4	0.267189
ENSG00000135773	CAPN9	0	2	0.267256
ENSG00000205356	TECPR1	0	1	0.267529
ENSG00000124198	ARFGEF2	0	2	0.267693
ENSG00000213983	AP1G2	0	3	0.267833
ENSG00000178202	POGLUT3	0	3	0.268235
ENSG00000180376	CCDC66	0	2	0.268344
ENSG00000198793	MTOR	0	3	0.268378
ENSG00000242612	DECR2	0	1	0.268523
ENSG00000197969	VPS13A	0	2	0.268757
ENSG00000145016	RUBCN	0	2	0.268779
ENSG00000225830	ERCC6	0	2	0.268801
ENSG00000165194	PCDH19	0	2	0.26942
ENSG00000103994	ZNF106	0	2	0.269601
ENSG00000255150	EID3	0	3	0.269615
ENSG00000078687	TNRC6C	0	2	0.269692
ENSG00000105879	CBLL1	0	1	0.269758
ENSG00000115365	LANCL1	0	1	0.269856
ENSG00000158352	SHROOM4	0	1	0.269856
ENSG00000134569	LRP4	0	2	0.269981
ENSG00000197694	SPTAN1	0	2	0.270272
ENSG00000133706	LARS1	0	3	0.270342
ENSG00000196576	PLXNB2	0	2	0.270454
ENSG00000174938	SEZ6L2	0	1	0.270809
ENSG00000149380	P4HA3	0	1	0.270964
ENSG00000214021	TTLL3	0	2	0.270971
ENSG00000141258	SGSM2	0	1	0.270972
ENSG00000144908	ALDH1L1	0	2	0.272119
ENSG00000115504	EHBP1	0	1	0.272237
ENSG00000140553	UNC45A	0	2	0.272269
ENSG00000120694	HSPH1	0	2	0.272572
ENSG00000116406	EDEM3	0	3	0.272793
ENSG00000129295	LRRC6	0	3	0.272957
ENSG00000259030	FPGT-TNNI3K	0	2	0.273159
ENSG00000110237	ARHGEF17	0	2	0.273301
ENSG00000074771	NOX3	0	2	0.27336
ENSG00000117523	PRRC2C	0	3	0.27337
ENSG00000105429	MEGF8	0	3	0.273407
ENSG00000170776	AKAP13	0	2	0.273819
ENSG00000061273	HDAC7	0	1	0.27393
ENSG00000078795	PKD2L2	0	3	0.273931
ENSG00000216937	CCDC7	0	1	0.273971
ENSG00000204590	GNL1	0	2	0.273981
ENSG00000168334	XIRP1	0	2	0.274479
ENSG00000142871	CCN1	0	1	0.274514
ENSG00000010818	HIVEP2	0	2	0.274571
ENSG00000115896	PLCL1	0	2	0.274746
ENSG00000124006	OBSL1	0	3	0.274873
ENSG00000248905	FMN1	0	2	0.274972
ENSG00000132470	ITGB4	0	4	0.275558
ENSG00000151320	AKAP6	0	3	0.276092
ENSG00000134709	HOOK1	0	2	0.276218
ENSG00000014164	ZC3H3	0	1	0.276476
ENSG00000124782	RREB1	0	1	0.276476
ENSG00000175221	MED16	0	1	0.276476
ENSG00000114745	GORASP1	0	2	0.276618
ENSG00000164080	RAD54L2	0	3	0.2767
ENSG00000165521	EML5	0	1	0.276946
ENSG00000103544	VPS35L	0	3	0.277052
ENSG00000182348	ZNF804B	0	2	0.277078
ENSG00000184005	ST6GALNAC3	0	2	0.277259
ENSG00000168724	DNAJC21	0	2	0.277419
ENSG00000116128	BCL9	0	2	0.277648
ENSG00000185347	TEDC1	0	2	0.277698
ENSG00000130940	CASZ1	0	1	0.27778
ENSG00000169126	ODAD2	0	1	0.27778
ENSG00000197415	VEPH1	0	1	0.27778
ENSG00000115459	ELMOD3	0	2	0.277939
ENSG00000006071	ABCC8	0	2	0.278291
ENSG00000168502	MTCL1	0	2	0.278488
ENSG00000168619	ADAM18	0	1	0.278541
ENSG00000171444	MCC	0	1	0.278541
ENSG00000256087	ZNF432	0	2	0.278757
ENSG00000169946	ZFPM2	0	1	0.278761
ENSG00000188803	SHISA6	0	3	0.278984
ENSG00000122728	TAF1L	0	3	0.278985
ENSG00000165300	SLITRK5	0	1	0.279527
ENSG00000074047	GLI2	0	2	0.279609
ENSG00000154803	FLCN	0	1	0.279633
ENSG00000115234	SNX17	0	3	0.279643
ENSG00000106328	FSCN3	0	1	0.279945
ENSG00000149633	KIAA1755	0	1	0.279945
ENSG00000171094	ALK	0	2	0.280027
ENSG00000105675	ATP4A	0	2	0.280028
ENSG00000143369	ECM1	0	2	0.280227
ENSG00000099994	SUSD2	0	3	0.280375
ENSG00000104043	ATP8B4	0	2	0.280419
ENSG00000115464	USP34	0	3	0.280617
ENSG00000138075	ABCG5	0	2	0.280646
ENSG00000137177	KIF13A	0	3	0.280663
ENSG00000186187	ZNRF1	0	4	0.280684
ENSG00000163531	NFASC	0	3	0.281445
ENSG00000076201	PTPN23	0	3	0.281508
ENSG00000127329	PTPRB	0	3	0.281871
ENSG00000143942	CHAC2	0	2	0.282782
ENSG00000180096	SEPTIN1	1	28	0.282827
ENSG00000052749	RRP12	0	3	0.282908
ENSG00000065060	UHRF1BP1	0	1	0.283438
ENSG00000011566	MAP4K3	0	2	0.283794
ENSG00000170374	SP7	0	3	0.284133
ENSG00000076928	ARHGEF1	0	2	0.284206
ENSG00000158125	XDH	0	3	0.284317
ENSG00000264424	MYH4	0	2	0.284607
ENSG00000108578	BLMH	0	3	0.284669
ENSG00000068724	TTC7A	0	2	0.284733
ENSG00000139537	CCDC65	0	1	0.28495
ENSG00000175894	TSPEAR	0	3	0.285179
ENSG00000115361	ACADL	0	3	0.285309
ENSG00000149090	PAMR1	0	2	0.28553
ENSG00000115993	TRAK2	0	2	0.285545
ENSG00000100116	GCAT	0	3	0.285585
ENSG00000108846	ABCC3	0	3	0.28571
ENSG00000178252	WDR6	0	1	0.285864
ENSG00000133256	PDE6B	0	2	0.285993
ENSG00000078674	PCM1	0	1	0.286279
ENSG00000126254	RBM42	0	1	0.286279
ENSG00000147481	SNTG1	0	1	0.286279
ENSG00000048342	CC2D2A	0	1	0.286399
ENSG00000112139	MDGA1	0	1	0.286399
ENSG00000125414	MYH2	0	3	0.286414
ENSG00000134775	FHOD3	0	2	0.286478
ENSG00000140400	MAN2C1	0	3	0.286735
ENSG00000198198	SZT2	0	3	0.287246
ENSG00000115255	REEP6	0	1	0.287701
ENSG00000136205	TNS3	0	3	0.287705
ENSG00000164061	BSN	0	3	0.287958
ENSG00000100345	MYH9	0	3	0.28813
ENSG00000104142	VPS18	0	3	0.288337
ENSG00000106624	AEBP1	0	2	0.28875
ENSG00000144791	LIMD1	0	1	0.289212
ENSG00000259207	ITGB3	0	2	0.28923
ENSG00000110799	VWF	0	3	0.289628
ENSG00000151468	CCDC3	0	2	0.289726
ENSG00000096696	DSP	0	3	0.290084
ENSG00000111799	COL12A1	0	4	0.290573
ENSG00000204301	NOTCH4	0	2	0.290612
ENSG00000140798	ABCC12	0	2	0.290845
ENSG00000196586	MYO6	0	4	0.291512
ENSG00000112419	PHACTR2	0	2	0.291764
ENSG00000164465	DCBLD1	0	3	0.291827
ENSG00000103657	HERC1	0	3	0.291994
ENSG00000064270	ATP2C2	0	1	0.292386
ENSG00000070886	EPHA8	0	3	0.292627
ENSG00000103197	TSC2	0	3	0.292637
ENSG00000009954	BAZ1B	0	2	0.292853
ENSG00000048707	VPS13D	0	3	0.29287
ENSG00000154258	ABCA9	0	2	0.294126
ENSG00000196924	FLNA	0	3	0.294662
ENSG00000175215	CTDSP2	0	73	0.295112
ENSG00000101407	TTI1	0	2	0.295692
ENSG00000179520	SLC17A8	0	1	0.296536
ENSG00000112038	OPRM1	0	3	0.296685
ENSG00000146350	TBC1D32	0	2	0.296728
ENSG00000070748	CHAT	0	2	0.296822
ENSG00000156222	SLC28A1	0	3	0.296931
ENSG00000108021	TASOR2	0	3	0.29714
ENSG00000196526	AFAP1	0	1	0.297234
ENSG00000132382	MYBBP1A	0	3	0.297361
ENSG00000248592	STIMATE-MUSTN1	0	4	0.297651
ENSG00000134982	APC	0	3	0.297656
ENSG00000127837	AAMP	0	1	0.297878
ENSG00000185697	MYBL1	0	1	0.297878
ENSG00000155229	MMS19	0	2	0.298358
ENSG00000143162	CREG1	0	2	0.298557
ENSG00000254656	RTL1	0	1	0.299327
ENSG00000095951	HIVEP1	0	2	0.299782
ENSG00000132424	PNISR	0	2	0.299816
ENSG00000132854	KANK4	0	1	0.29999
ENSG00000197616	MYH6	0	3	0.300068
ENSG00000112280	COL9A1	0	3	0.30015
ENSG00000164944	VIRMA	0	3	0.300263
ENSG00000081248	CACNA1S	0	3	0.300461
ENSG00000033100	CHPF2	0	3	0.300774
ENSG00000257008	GPR142	0	3	0.301004
ENSG00000075914	EXOSC7	0	2	0.301105
ENSG00000078269	SYNJ2	0	2	0.301225
ENSG00000139734	DIAPH3	0	2	0.301253
ENSG00000173250	GPR151	0	1	0.301429
ENSG00000136068	FLNB	0	3	0.302148
ENSG00000182871	COL18A1	0	3	0.302621
ENSG00000068024	HDAC4	0	1	0.302664
ENSG00000126247	CAPNS1	0	1	0.302664
ENSG00000143669	LYST	0	3	0.303163
ENSG00000090402	SI	0	4	0.303809
ENSG00000130529	TRPM4	0	2	0.303818
ENSG00000135525	MAP7	0	3	0.304139
ENSG00000162402	USP24	0	2	0.30428
ENSG00000135439	AGAP2	0	3	0.304379
ENSG00000128731	HERC2	0	2	0.304393
ENSG00000117713	ARID1A	0	3	0.304545
ENSG00000144036	EXOC6B	0	2	0.304793
ENSG00000141027	NCOR1	0	2	0.306239
ENSG00000173821	RNF213	0	2	0.306429
ENSG00000197535	MYO5A	0	2	0.307158
ENSG00000085760	MTIF2	0	2	0.30739
ENSG00000242802	AP5Z1	0	3	0.30749
ENSG00000114316	USP4	0	3	0.307746
ENSG00000128655	PDE11A	0	3	0.30884
ENSG00000214013	GANC	0	2	0.309706
ENSG00000111713	GYS2	0	2	0.309754
ENSG00000146950	SHROOM2	0	1	0.311065
ENSG00000196535	MYO18A	0	3	0.311346
ENSG00000092853	CLSPN	0	2	0.311735
ENSG00000129317	PUS7L	0	3	0.311905
ENSG00000164253	WDR41	0	2	0.312732
ENSG00000175567	UCP2	0	1	0.313448
ENSG00000159450	TCHH	0	4	0.313662
ENSG00000124615	MOCS1	0	4	0.314442
ENSG00000177303	CASKIN2	0	3	0.314561
ENSG00000165029	ABCA1	0	2	0.314968
ENSG00000174498	IGDCC3	0	3	0.316225
ENSG00000206384	COL6A6	0	2	0.316775
ENSG00000111877	MCM9	0	3	0.316959
ENSG00000141161	UNC45B	0	3	0.317448
ENSG00000159640	ACE	0	4	0.317625
ENSG00000166347	CYB5A	0	2	0.317819
ENSG00000147485	PXDNL	0	2	0.318613
ENSG00000145075	CCDC39	0	3	0.319041
ENSG00000124089	MC3R	0	3	0.31917
ENSG00000151687	ANKAR	0	4	0.320546
ENSG00000159023	EPB41	0	2	0.321622
ENSG00000111641	NOP2	0	3	0.322354
ENSG00000076356	PLXNA2	0	3	0.32412
ENSG00000186472	PCLO	0	4	0.324235
ENSG00000132849	PATJ	0	3	0.325193
ENSG00000197943	PLCG2	0	3	0.325653
ENSG00000134343	ANO3	0	4	0.325799
ENSG00000160606	TLCD1	0	3	0.326525
ENSG00000156299	TIAM1	0	4	0.327572
ENSG00000103381	CPPED1	0	4	0.327595
ENSG00000152467	ZSCAN1	0	3	0.327718
ENSG00000187240	DYNC2H1	0	4	0.328103
ENSG00000112246	SIM1	0	2	0.328195
ENSG00000198099	ADH4	0	3	0.329437
ENSG00000154415	PPP1R3A	0	1	0.330067
ENSG00000109063	MYH3	0	4	0.330178
ENSG00000115414	FN1	0	3	0.330304
ENSG00000162688	AGL	0	3	0.330488
ENSG00000150893	FREM2	0	3	0.330726
ENSG00000139292	LGR5	0	1	0.33085
ENSG00000136573	BLK	0	3	0.332403
ENSG00000145685	LHFPL2	0	1	0.332653
ENSG00000204469	PRRC2A	0	4	0.332997
ENSG00000100889	PCK2	0	4	0.333213
ENSG00000184144	CNTN2	0	4	0.333236
ENSG00000121270	ABCC11	0	4	0.33334
ENSG00000136111	TBC1D4	0	4	0.333644
ENSG00000133816	MICAL2	0	5	0.333677
ENSG00000177731	FLII	0	2	0.333956
ENSG00000198626	RYR2	0	4	0.334068
ENSG00000144824	PHLDB2	0	3	0.334128
ENSG00000077232	DNAJC10	0	3	0.334547
ENSG00000095777	MYO3A	0	3	0.334605
ENSG00000166246	C16orf71	0	4	0.337756
ENSG00000135218	CD36	0	2	0.337809
ENSG00000114204	SERPINI2	0	4	0.33914
ENSG00000121898	CPXM2	0	3	0.34013
ENSG00000094963	FMO2	0	4	0.340184
ENSG00000184792	OSBP2	0	2	0.34037
ENSG00000165891	E2F7	0	3	0.340862
ENSG00000115020	PIKFYVE	0	3	0.341166
ENSG00000167978	SRRM2	0	4	0.34327
ENSG00000176225	RTTN	0	2	0.343986
ENSG00000173898	SPTBN2	0	3	0.345007
ENSG00000116984	MTR	0	3	0.345936
ENSG00000047457	CP	0	2	0.347006
ENSG00000092054	MYH7	0	2	0.348384
ENSG00000164082	GRM2	0	2	0.348815
ENSG00000166341	DCHS1	0	2	0.348823
ENSG00000154734	ADAMTS1	0	3	0.349134
ENSG00000104884	ERCC2	0	3	0.349527
ENSG00000167972	ABCA3	0	4	0.34954
ENSG00000133226	SRRM1	0	4	0.349577
ENSG00000181192	DHTKD1	0	3	0.350331
ENSG00000128591	FLNC	0	4	0.352689
ENSG00000047936	ROS1	0	4	0.353406
ENSG00000091656	ZFHX4	0	3	0.354139
ENSG00000136878	USP20	0	2	0.35449
ENSG00000180346	TIGD2	0	1	0.355621
ENSG00000169855	ROBO1	0	4	0.356221
ENSG00000149782	PLCB3	0	1	0.356896
ENSG00000079393	DUSP13	0	5	0.357906
ENSG00000198796	ALPK2	0	2	0.357941
ENSG00000177200	CHD9	0	4	0.359987
ENSG00000198589	LRBA	0	3	0.360102
ENSG00000146414	SHPRH	0	4	0.360118
ENSG00000181378	CFAP65	0	3	0.360135
ENSG00000102763	VWA8	0	2	0.361564
ENSG00000145555	MYO10	0	2	0.361909
ENSG00000060656	PTPRU	0	4	0.362006
ENSG00000164175	SLC45A2	0	3	0.362456
ENSG00000144452	ABCA12	0	4	0.364182
ENSG00000137497	NUMA1	0	5	0.364289
ENSG00000196116	TDRD7	0	1	0.364695
ENSG00000167395	ZNF646	0	4	0.365405
ENSG00000148396	SEC16A	0	3	0.365493
ENSG00000164292	RHOBTB3	0	5	0.365565
ENSG00000155465	SLC7A7	0	3	0.365577
ENSG00000151835	SACS	0	5	0.365636
ENSG00000136861	CDK5RAP2	0	3	0.36584
ENSG00000092421	SEMA6A	0	3	0.366278
ENSG00000101639	CEP192	0	5	0.367558
ENSG00000107165	TYRP1	0	5	0.367569
ENSG00000172053	QARS1	0	1	0.367628
ENSG00000159140	SON	0	3	0.368127
ENSG00000140396	NCOA2	0	4	0.368876
ENSG00000130159	ECSIT	0	5	0.369428
ENSG00000130720	FIBCD1	0	3	0.36966
ENSG00000173040	EVC2	0	4	0.370474
ENSG00000174446	SNAPC5	0	3	0.370499
ENSG00000006788	MYH13	0	2	0.370977
ENSG00000183018	SPNS2	0	4	0.371051
ENSG00000148702	HABP2	0	3	0.371218
ENSG00000038532	CLEC16A	0	3	0.371375
ENSG00000092068	SLC7A8	0	1	0.373382
ENSG00000103671	TRIP4	0	1	0.373382
ENSG00000109501	WFS1	0	4	0.373443
ENSG00000198354	DCAF12L2	0	4	0.374542
ENSG00000164125	GASK1B	0	3	0.374589
ENSG00000142632	ARHGEF19	0	3	0.375964
ENSG00000148180	GSN	0	2	0.37661
ENSG00000163359	COL6A3	0	4	0.377317
ENSG00000120549	KIAA1217	0	4	0.377592
ENSG00000198947	DMD	0	5	0.377866
ENSG00000100150	DEPDC5	0	4	0.380533
ENSG00000082516	GEMIN5	0	5	0.380558
ENSG00000123384	LRP1	0	6	0.380721
ENSG00000174807	CD248	0	2	0.380726
ENSG00000145217	SLC26A1	0	4	0.382283
ENSG00000164346	NSA2	0	2	0.382988
ENSG00000183117	CSMD1	0	4	0.383147
ENSG00000196498	NCOR2	0	5	0.383743
ENSG00000133246	PRAM1	0	1	0.384044
ENSG00000154646	TMPRSS15	0	3	0.384862
ENSG00000166833	NAV2	0	3	0.384912
ENSG00000123066	MED13L	0	5	0.385526
ENSG00000152818	UTRN	0	4	0.385656
ENSG00000108510	MED13	0	3	0.385949
ENSG00000165271	NOL6	0	5	0.386179
ENSG00000121281	ADCY7	0	5	0.387044
ENSG00000079308	TNS1	0	5	0.387426
ENSG00000163803	PLB1	0	2	0.387527
ENSG00000126088	UROD	0	2	0.38811
ENSG00000132561	MATN2	0	2	0.388491
ENSG00000130254	SAFB2	0	1	0.389695
ENSG00000175065	DSG4	0	1	0.389695
ENSG00000179915	NRXN1	0	6	0.391634
ENSG00000123191	ATP7B	0	6	0.39289
ENSG00000139718	SETD1B	0	1	0.393418
ENSG00000135636	DYSF	0	5	0.393733
ENSG00000168676	KCTD19	0	4	0.393998
ENSG00000188732	FAM221A	0	4	0.394353
ENSG00000169432	SCN9A	0	4	0.395244
ENSG00000151914	DST	0	5	0.395521
ENSG00000198707	CEP290	0	5	0.396858
ENSG00000214595	EML6	0	3	0.397133
ENSG00000068976	PYGM	0	4	0.398776
ENSG00000129422	MTUS1	0	3	0.399467
ENSG00000185585	OLFML2A	0	4	0.40083
ENSG00000175793	SFN	0	5	0.40087
ENSG00000130787	HIP1R	0	4	0.401616
ENSG00000158019	BABAM2	0	1	0.402262
ENSG00000163618	CADPS	0	4	0.404165
ENSG00000197705	KLHL14	0	1	0.405693
ENSG00000167548	KMT2D	0	5	0.406388
ENSG00000074803	SLC12A1	0	3	0.40677
ENSG00000198919	DZIP3	0	1	0.40706
ENSG00000138829	FBN2	0	6	0.407071
ENSG00000167207	NOD2	0	6	0.407115
ENSG00000253767	PCDHGA8	0	5	0.409198
ENSG00000100154	TTC28	0	4	0.409608
ENSG00000006377	DLX6	0	1	0.411549
ENSG00000126259	KIRREL2	0	6	0.418275
ENSG00000148843	PDCD11	0	4	0.419456
ENSG00000196547	MAN2A2	0	1	0.420591
ENSG00000101161	PRPF6	0	2	0.421072
ENSG00000164199	ADGRV1	1	24	0.421939
ENSG00000142082	SIRT3	0	5	0.422917
ENSG00000099331	MYO9B	0	1	0.423049
ENSG00000165714	BORCS5	0	1	0.423049
ENSG00000001626	CFTR	0	6	0.424051
ENSG00000140836	ZFHX3	0	6	0.426663
ENSG00000142197	DOP1B	0	7	0.427442
ENSG00000144283	PKP4	0	6	0.427447
ENSG00000116147	TNR	0	5	0.429998
ENSG00000214814	FER1L6	0	4	0.430579
ENSG00000154358	OBSCN	1	36	0.430849
ENSG00000196569	LAMA2	0	4	0.431595
ENSG00000004534	RBM6	1	38	0.433528
ENSG00000115760	BIRC6	0	5	0.435831
ENSG00000164627	KIF6	0	4	0.435956
ENSG00000066056	TIE1	0	1	0.438638
ENSG00000185313	SCN10A	0	5	0.438797
ENSG00000137076	TLN1	0	6	0.441358
ENSG00000057294	PKP2	0	2	0.444571
ENSG00000154889	MPPE1	0	6	0.446683
ENSG00000154237	LRRK1	0	3	0.447293
ENSG00000140873	ADAMTS18	0	5	0.447725
ENSG00000164946	FREM1	0	6	0.451035
ENSG00000088827	SIGLEC1	0	2	0.451453
ENSG00000107249	GLIS3	0	6	0.454246
ENSG00000107186	MPDZ	0	4	0.454785
ENSG00000124019	FAM124B	0	1	0.456645
ENSG00000105281	SLC1A5	0	5	0.459095
ENSG00000150627	WDR17	0	7	0.459465
ENSG00000166473	PKD1L2	0	5	0.462394
ENSG00000125898	FAM110A	0	1	0.463305
ENSG00000137601	NEK1	0	1	0.463305
ENSG00000167930	FAM234A	0	6	0.46369
ENSG00000166963	MAP1A	0	5	0.464998
ENSG00000142449	FBN3	0	6	0.466184
ENSG00000142798	HSPG2	1	32	0.467783
ENSG00000108518	PFN1	0	7	0.469905
ENSG00000169379	ARL13B	0	7	0.475223
ENSG00000069188	SDK2	0	8	0.47613
ENSG00000115657	ABCB6	0	6	0.477809
ENSG00000164953	TMEM67	0	6	0.478022
ENSG00000132024	CC2D1A	0	6	0.482582
ENSG00000163576	EFHB	0	7	0.483984
ENSG00000177084	POLE	0	7	0.484024
ENSG00000149256	TENM4	1	41	0.487717
ENSG00000107731	UNC5B	0	7	0.488655
ENSG00000053747	LAMA3	0	4	0.488701
ENSG00000159588	CCDC17	0	2	0.49229
ENSG00000096433	ITPR3	0	6	0.493022
ENSG00000007174	DNAH9	0	8	0.494485
ENSG00000144426	NBEAL1	0	6	0.498448
ENSG00000010327	STAB1	0	8	0.50257
ENSG00000178209	PLEC	0	8	0.503419
ENSG00000183914	DNAH2	0	9	0.503549
ENSG00000059122	FLYWCH1	0	2	0.509119
ENSG00000070182	SPTB	0	6	0.509616
ENSG00000100461	RBM23	0	1	0.512461
ENSG00000123104	ITPR2	0	2	0.512493
ENSG00000172869	DMXL1	0	6	0.514817
ENSG00000076555	ACACB	0	7	0.51618
ENSG00000143341	HMCN1	0	8	0.51762
[truncated: 96 more rows]

## Sheet: Synonymous model
Ensembl Gene ID	Gene Symbol	Cases (n=66)	Controls (n=2923)	p values
ENSG00000100281	HMGXB4	2	0	0.000100345
ENSG00000013306	SLC25A39	3	4	0.000103115
ENSG00000184371	CSF1	3	6	0.000132323
ENSG00000206561	COLQ	2	1	0.000148043
ENSG00000079215	SLC1A3	2	1	0.000257298
ENSG00000173890	GPR160	2	2	0.000260011
ENSG00000137713	PPP2R1B	3	8	0.000292211
ENSG00000131013	PPIL4	3	7	0.000299425
ENSG00000114923	SLC4A3	4	15	0.0003069
ENSG00000128656	CHN1	3	6	0.000333186
ENSG00000144306	SCRN3	2	3	0.000415726
ENSG00000251192	ZNF674	2	2	0.000426924
ENSG00000162989	KCNJ3	2	2	0.000451681
ENSG00000157211	CDCP2	3	11	0.00051808
ENSG00000198398	TMEM207	2	2	0.000592741
ENSG00000112096	SOD2	3	0	0.000629619
ENSG00000125815	CST8	2	3	0.000670129
ENSG00000101892	ATP1B4	2	3	0.000773311
ENSG00000111305	GSG1	1	0	0.00082572
ENSG00000148798	INA	1	0	0.00082572
ENSG00000136522	MRPL47	1	0	0.000837374
ENSG00000001460	STPG1	2	1	0.000875798
ENSG00000116863	ADPRS	2	2	0.000936578
ENSG00000071859	FAM50A	2	3	0.000981698
ENSG00000166136	NDUFB8	2	4	0.000989108
ENSG00000146221	TCTE1	2	4	0.00106646
ENSG00000104432	IL7	1	0	0.00107134
ENSG00000157110	RBPMS	1	0	0.00107134
ENSG00000196139	AKR1C3	1	0	0.00107134
ENSG00000105255	FSD1	2	2	0.00109337
ENSG00000168883	USP39	2	3	0.00113693
ENSG00000164296	TIGD6	1	0	0.00115606
ENSG00000071282	LMCD1	3	9	0.00128564
ENSG00000116120	FARSB	2	5	0.00129531
ENSG00000108255	CRYBA1	1	0	0.00133702
ENSG00000138660	AP1AR	1	0	0.00133702
ENSG00000025293	PHF20	2	4	0.00137824
ENSG00000143537	ADAM15	3	12	0.00141048
ENSG00000136279	DBNL	2	4	0.00145091
ENSG00000055118	KCNH2	3	14	0.0014739
ENSG00000168542	COL3A1	7	20	0.00149951
ENSG00000188886	ASTL	2	4	0.00160162
ENSG00000196660	SLC30A10	2	3	0.00172748
ENSG00000167508	MVD	2	4	0.00183827
ENSG00000051009	FAM160A2	3	12	0.00186324
ENSG00000264364	DYNLL2	1	0	0.00186851
ENSG00000140280	LYSMD2	1	0	0.00194196
ENSG00000113845	TIMMDC1	1	0	0.0019647
ENSG00000184900	SUMO3	1	0	0.0019647
ENSG00000105700	KXD1	1	0	0.00196919
ENSG00000156515	HK1	3	17	0.00197363
ENSG00000186009	ATP4B	2	6	0.00197954
ENSG00000186815	TPCN1	3	14	0.00198864
ENSG00000152292	SH2D6	1	1	0.00210082
ENSG00000144821	MYH15	3	13	0.00214839
ENSG00000103343	ZNF174	1	1	0.00221045
ENSG00000171497	PPID	1	0	0.00221827
ENSG00000196772	OR14A16	2	6	0.00244106
ENSG00000158428	CATIP	2	6	0.00246809
ENSG00000124157	SEMG2	2	4	0.00249314
ENSG00000094804	CDC6	2	6	0.00250202
ENSG00000169105	CHST14	1	1	0.00250696
ENSG00000182103	FAM181B	1	0	0.00261202
ENSG00000183891	TTC32	1	0	0.00262823
ENSG00000214290	COLCA2	1	0	0.00262823
ENSG00000167531	LALBA	1	0	0.00267694
ENSG00000118200	CAMSAP2	2	4	0.00268235
ENSG00000112715	VEGFA	3	15	0.00269321
ENSG00000165246	NLGN4Y	1	0	0.00274961
ENSG00000148660	CAMK2G	2	6	0.00280749
ENSG00000138653	NDST4	2	5	0.00290291
ENSG00000100346	CACNA1I	4	31	0.00297661
ENSG00000100079	LGALS2	1	0	0.00304505
ENSG00000197721	CR1L	1	0	0.00304505
ENSG00000170484	KRT74	2	7	0.00307901
ENSG00000148110	MFSD14B	1	1	0.00327366
ENSG00000179674	ARL14	2	6	0.00327731
ENSG00000134815	DHX34	3	20	0.00330663
ENSG00000104852	SNRNP70	2	6	0.00343164
ENSG00000198668	CALM1	1	0	0.00343605
ENSG00000119514	GALNT12	2	8	0.0034926
ENSG00000118680	MYL12B	1	1	0.00355475
ENSG00000198822	GRM3	3	19	0.00362326
ENSG00000149269	PAK1	2	6	0.00373506
ENSG00000143207	COP1	2	5	0.00374666
ENSG00000197249	SERPINA1	2	6	0.00375259
ENSG00000134198	TSPAN2	1	1	0.00379303
ENSG00000163541	SUCLG1	1	0	0.00383206
ENSG00000135617	PRADC1	1	1	0.00388614
ENSG00000071991	CDH19	2	7	0.00395184
ENSG00000108984	MAP2K6	1	1	0.00398989
ENSG00000124762	CDKN1A	1	1	0.0040087
ENSG00000135077	HAVCR2	1	1	0.00410401
ENSG00000198783	ZNF830	2	1	0.00416539
ENSG00000169583	CLIC3	1	1	0.00417403
ENSG00000182400	TRAPPC6B	1	1	0.00418856
ENSG00000127445	PIN1	1	0	0.00422851
ENSG00000141985	SH3GL1	1	1	0.00425738
ENSG00000116981	NT5C1A	1	1	0.00431364
ENSG00000133316	WDR74	1	1	0.00435495
ENSG00000102076	OPN1LW	2	7	0.00435948
ENSG00000003402	CFLAR	1	1	0.00442624
ENSG00000222046	DCDC2B	1	2	0.00443189
ENSG00000185608	MRPL40	1	1	0.00447042
ENSG00000159214	CCDC24	1	1	0.00454678
ENSG00000162849	KIF26B	4	30	0.00457666
ENSG00000132781	MUTYH	2	9	0.00459744
ENSG00000164615	CAMLG	1	1	0.00466043
ENSG00000160446	ZDHHC12	1	1	0.00469692
ENSG00000198791	CNOT7	1	1	0.00473844
ENSG00000176407	KCMF1	1	1	0.00475272
ENSG00000147669	POLR2K	1	2	0.00478156
ENSG00000112837	TBX18	2	5	0.00484518
ENSG00000125730	C3	4	36	0.00487469
ENSG00000110013	SIAE	1	1	0.00487815
ENSG00000111291	GPRC5D	1	1	0.00489092
ENSG00000100592	DAAM1	2	6	0.00493768
ENSG00000249915	PDCD6	2	8	0.004955
ENSG00000125848	FLRT3	2	6	0.00496488
ENSG00000262814	MRPL12	1	1	0.00504026
ENSG00000162174	ASRGL1	1	1	0.00506935
ENSG00000014164	ZC3H3	3	18	0.00508513
ENSG00000135124	P2RX4	2	7	0.00508669
ENSG00000181781	ODF3L2	1	0	0.00515406
ENSG00000215853	RPTN	2	4	0.00533855
ENSG00000167447	SMG8	2	8	0.00536875
ENSG00000205531	NAP1L4	2	6	0.00539247
ENSG00000104332	SFRP1	2	2	0.00542936
ENSG00000109991	P2RX3	2	8	0.00545561
ENSG00000184937	WT1	2	9	0.00546683
ENSG00000127588	GNG13	1	1	0.00557666
ENSG00000143458	GABPB2	1	1	0.0056239
ENSG00000189326	SPANXN4	1	0	0.0056987
ENSG00000197385	ZNF860	1	1	0.0058159
ENSG00000070761	CFAP20	1	0	0.00581993
ENSG00000078900	TP73	2	6	0.00582092
ENSG00000164825	DEFB1	1	1	0.00588896
ENSG00000067798	NAV3	3	22	0.00594817
ENSG00000104415	CCN4	2	8	0.00594855
ENSG00000215183	MSMP	1	2	0.00594904
ENSG00000142494	SLC47A1	1	2	0.00597418
ENSG00000111879	FAM184A	1	1	0.00602663
ENSG00000125870	SNRPB2	1	2	0.00626597
ENSG00000168528	SERINC2	2	11	0.00627234
ENSG00000197405	C5AR1	2	8	0.00628371
ENSG00000081818	PCDHB4	1	1	0.00632365
ENSG00000204577	LILRB3	1	2	0.00632684
ENSG00000147896	IFNK	1	1	0.00634975
ENSG00000167094	TTC16	2	10	0.00637759
ENSG00000157191	NECAP2	2	8	0.00638522
ENSG00000143355	LHX9	1	1	0.0065331
ENSG00000170234	PWWP2A	1	2	0.00654979
ENSG00000068024	HDAC4	4	32	0.00658785
ENSG00000168916	ZNF608	3	19	0.00662652
ENSG00000007384	RHBDF1	2	9	0.00676601
ENSG00000196104	SPOCK3	1	1	0.00676913
ENSG00000205884	DEFB136	1	1	0.00679541
ENSG00000121634	GJA8	2	8	0.00694373
ENSG00000197532	OR6Y1	1	1	0.00704087
ENSG00000124116	WFDC3	1	2	0.00717597
ENSG00000163535	SGO2	2	8	0.00726017
ENSG00000086061	DNAJA1	1	1	0.00726351
ENSG00000100442	FKBP3	1	1	0.00742395
ENSG00000134905	CARS2	3	18	0.00746139
ENSG00000100220	RTCB	2	9	0.00748694
ENSG00000188735	TMEM120B	1	1	0.0076231
ENSG00000205629	LCMT1	1	2	0.00766922
ENSG00000177084	POLE	4	31	0.00768577
ENSG00000124003	MOGAT1	1	2	0.00800728
ENSG00000213281	NRAS	1	2	0.00801708
ENSG00000004838	ZMYND10	1	3	0.00802531
ENSG00000182327	GLTPD2	1	1	0.00806143
ENSG00000204977	TRIM13	1	2	0.00813882
ENSG00000129451	KLK10	1	2	0.00817591
ENSG00000139714	MORN3	1	2	0.00822097
ENSG00000147099	HDAC8	1	2	0.00825163
ENSG00000147869	CER1	1	1	0.00826787
ENSG00000173567	ADGRF3	3	26	0.00827872
ENSG00000118690	ARMC2	2	9	0.00843138
ENSG00000156265	MAP3K7CL	1	3	0.00846425
ENSG00000121766	ZCCHC17	1	1	0.0084668
ENSG00000124602	UNC5CL	2	12	0.00851643
ENSG00000073605	GSDMB	1	3	0.00857099
ENSG00000052749	RRP12	3	23	0.00866632
ENSG00000189420	ZFP92	1	1	0.00866841
ENSG00000198521	ZNF43	1	2	0.00872917
ENSG00000160888	IER2	1	1	0.00880552
ENSG00000132467	UTP3	1	2	0.00881143
ENSG00000063978	RNF4	1	2	0.00894867
ENSG00000141655	TNFRSF11A	2	9	0.00902674
ENSG00000120729	MYOT	2	6	0.00903137
ENSG00000151725	CENPU	1	1	0.00907299
ENSG00000153485	TMEM251	1	1	0.00916818
ENSG00000101445	PPP1R16B	2	10	0.00919552
ENSG00000204703	OR2B3	1	1	0.0093081
ENSG00000162572	SCNN1D	3	25	0.00934548
ENSG00000104983	CCDC61	1	2	0.00950312
ENSG00000182220	ATP6AP2	1	2	0.00951856
ENSG00000188716	DUSP29	1	3	0.00957447
ENSG00000106299	WASL	1	3	0.00966375
ENSG00000137494	ANKRD42	1	2	0.00966659
ENSG00000115866	DARS1	1	2	0.00969681
ENSG00000139572	GPR84	1	2	0.00975072
ENSG00000101335	MYL9	1	1	0.00979016
ENSG00000178826	TMEM139	1	1	0.00986267
ENSG00000165891	E2F7	2	11	0.00988021
ENSG00000117461	PIK3R3	1	1	0.00990178
ENSG00000155755	TMEM237	1	2	0.0100167
ENSG00000178078	STAP2	1	2	0.0100329
ENSG00000196547	MAN2A2	3	24	0.0100423
ENSG00000161270	NPHS1	3	21	0.010052
ENSG00000114013	CD86	1	2	0.0100536
ENSG00000183631	PRR32	1	2	0.0101041
ENSG00000205038	PKHD1L1	4	43	0.010151
ENSG00000111711	GOLT1B	1	2	0.0102165
ENSG00000171161	ZNF672	1	2	0.01029
ENSG00000145817	YIPF5	1	1	0.0102944
ENSG00000101842	VSIG1	1	3	0.0103909
ENSG00000171621	SPSB1	2	9	0.0104145
ENSG00000148835	TAF5	2	10	0.0104709
ENSG00000091592	NLRP1	2	12	0.0105193
ENSG00000168569	TMEM223	1	2	0.0106131
ENSG00000150054	MPP7	2	10	0.0107099
ENSG00000143420	ENSA	2	9	0.0107522
ENSG00000110080	ST3GAL4	1	2	0.0108684
ENSG00000138764	CCNG2	1	3	0.010974
ENSG00000108417	KRT37	2	8	0.011059
ENSG00000110958	PTGES3	1	2	0.0110674
ENSG00000111319	SCNN1A	2	10	0.0111301
ENSG00000158125	XDH	3	27	0.0111491
ENSG00000073737	DHRS9	2	7	0.0111649
ENSG00000153250	RBMS1	1	2	0.0111792
ENSG00000122133	PAEP	1	2	0.0111794
ENSG00000171858	RPS21	1	2	0.0111966
ENSG00000167757	KLK11	1	2	0.0113193
ENSG00000066136	NFYC	1	2	0.0113512
ENSG00000196832	OR11G2	1	2	0.0113557
ENSG00000137474	MYO7A	4	42	0.0113858
ENSG00000162494	LRRC38	1	2	0.0114856
ENSG00000186118	TEX38	1	3	0.0115251
ENSG00000109758	HGFAC	2	11	0.011552
ENSG00000157212	PAXIP1	2	12	0.0115735
ENSG00000137812	KNL1	3	22	0.0115964
ENSG00000100280	AP1B1	3	21	0.0116006
ENSG00000151503	NCAPD3	3	27	0.0117764
ENSG00000164743	C8orf48	1	2	0.0117968
ENSG00000188227	ZNF793	1	3	0.011925
ENSG00000124493	GRM4	2	9	0.0119856
ENSG00000068028	RASSF1	1	1	0.0120185
ENSG00000168612	ZSWIM1	2	14	0.0120422
ENSG00000147548	NSD3	2	12	0.0121447
ENSG00000078403	MLLT10	2	12	0.0122754
ENSG00000110492	MDK	1	3	0.012348
ENSG00000109339	MAPK10	1	3	0.0123483
ENSG00000145495	MARCHF6	2	12	0.0123634
ENSG00000181378	CFAP65	3	31	0.0123778
ENSG00000126233	SLURP1	1	2	0.0123916
ENSG00000087086	FTL	1	4	0.0124138
ENSG00000104361	NIPAL2	1	2	0.0124157
ENSG00000140398	NEIL1	1	2	0.0124548
ENSG00000184056	VPS33B	1	2	0.0125155
ENSG00000197953	AADACL2	1	2	0.0125942
ENSG00000090975	PITPNM2	3	26	0.0126722
ENSG00000134940	ACRV1	1	3	0.0127038
ENSG00000167525	PROCA1	2	8	0.0128943
ENSG00000137691	CFAP300	1	3	0.0129217
ENSG00000131845	ZNF304	1	0	0.0129416
ENSG00000236981	OR10G9	1	0	0.0129416
ENSG00000170832	USP32	2	9	0.0130237
ENSG00000166123	GPT2	2	10	0.0131173
ENSG00000174807	CD248	2	14	0.0131665
ENSG00000196323	ZBTB44	2	12	0.0131861
ENSG00000183741	CBX6	1	3	0.013266
ENSG00000146670	CDCA5	1	3	0.0132846
ENSG00000187260	WDR86	1	2	0.013312
ENSG00000177426	TGIF1	1	3	0.0133708
ENSG00000100557	CCDC198	1	2	0.0134438
ENSG00000152207	CYSLTR2	1	3	0.013473
ENSG00000168646	AXIN2	2	13	0.0135075
ENSG00000147650	LRP12	2	13	0.0136031
ENSG00000198768	APCDD1L	1	2	0.0136059
ENSG00000120341	SEC16B	2	11	0.0136152
ENSG00000164114	MAP9	1	3	0.0137122
ENSG00000131469	RPL27	1	1	0.0137772
ENSG00000166326	TRIM44	1	3	0.0138389
ENSG00000159184	HOXB13	1	3	0.0139561
ENSG00000173662	TAS1R1	2	12	0.0139906
ENSG00000074211	PPP2R2C	2	8	0.0140899
ENSG00000101680	LAMA1	4	37	0.0141339
ENSG00000120784	ZFP30	1	2	0.0141526
ENSG00000185915	KLHL34	1	3	0.0141891
ENSG00000124208	PEDS1-UBE2V1	1	3	0.0142021
ENSG00000184708	EIF4ENIF1	2	11	0.0142674
ENSG00000221845	C7orf65	1	3	0.0142862
ENSG00000164754	RAD21	1	3	0.0142877
ENSG00000119421	NDUFA8	1	3	0.0143061
ENSG00000258713	C20orf141	1	2	0.0143391
ENSG00000164048	ZNF589	1	1	0.0143415
ENSG00000165526	RPUSD4	1	4	0.0143468
ENSG00000108306	FBXL20	1	2	0.0143655
ENSG00000131738	KRT33B	2	12	0.0143925
ENSG00000122882	ECD	1	3	0.0144177
ENSG00000142552	RCN3	1	3	0.0144199
ENSG00000066382	MPPED2	1	3	0.014452
ENSG00000139445	FOXN4	2	12	0.0144554
ENSG00000223547	ZNF844	1	3	0.014519
ENSG00000180934	OR56A1	1	2	0.01453
ENSG00000149633	KIAA1755	3	26	0.0145886
ENSG00000135469	COQ10A	1	0	0.014637
ENSG00000184445	KNTC1	2	13	0.0147373
ENSG00000136280	CCM2	2	13	0.014947
ENSG00000184210	DGAT2L6	1	2	0.0149631
ENSG00000213780	GTF2H4	2	11	0.0151248
ENSG00000164051	CCDC51	1	3	0.0151609
ENSG00000179051	RCC2	1	3	0.0152236
ENSG00000104133	SPG11	3	28	0.01525
ENSG00000168566	SNRNP48	1	3	0.0152613
ENSG00000175203	DCTN2	1	3	0.0152857
ENSG00000169609	C15orf40	1	3	0.0153311
ENSG00000163485	ADORA1	1	3	0.0153533
ENSG00000184378	ACTRT3	1	3	0.0154583
ENSG00000108852	MPP2	2	15	0.015461
ENSG00000090376	IRAK3	1	3	0.0155376
ENSG00000167476	JSRP1	1	3	0.0155908
ENSG00000198198	SZT2	3	28	0.0155941
ENSG00000184058	TBX1	1	1	0.0156588
ENSG00000100154	TTC28	4	52	0.0156657
ENSG00000148219	ASTN2	3	24	0.0156715
ENSG00000160584	SIK3	2	14	0.0156826
ENSG00000187796	CARD9	2	13	0.0157402
ENSG00000089775	ZBTB25	1	3	0.0159511
ENSG00000184857	TMEM186	1	3	0.015974
ENSG00000134644	PUM1	2	14	0.0160062
ENSG00000138160	KIF11	2	12	0.0161064
ENSG00000165863	C10orf82	1	3	0.0161117
ENSG00000166347	CYB5A	1	4	0.0162002
ENSG00000087589	CASS4	2	15	0.016259
ENSG00000198752	CDC42BPB	3	28	0.0163789
ENSG00000116661	FBXO2	1	2	0.0164236
ENSG00000112343	TRIM38	1	3	0.0164758
ENSG00000071073	MGAT4A	1	3	0.0165029
ENSG00000091656	ZFHX4	4	48	0.0165154
ENSG00000127074	RGS13	1	2	0.0166676
ENSG00000127318	IL22	1	3	0.0166828
ENSG00000255561	FDXACB1	2	12	0.0167229
ENSG00000148215	OR5C1	2	8	0.0167966
ENSG00000175193	PARL	1	3	0.0169249
ENSG00000116871	MAP7D1	1	4	0.0169828
ENSG00000162378	ZYG11B	1	3	0.0170207
ENSG00000213886	UBD	1	3	0.0170335
ENSG00000174705	SH3PXD2B	2	16	0.0170762
ENSG00000163218	PGLYRP4	1	3	0.0171109
ENSG00000157578	LCA5L	1	3	0.0171502
ENSG00000164920	OSR2	2	8	0.0171671
ENSG00000206474	OR10C1	1	2	0.0171835
ENSG00000176732	PFN4	1	2	0.0172135
ENSG00000156675	RAB11FIP1	2	13	0.0172282
ENSG00000168872	DDX19A	1	4	0.0172685
ENSG00000148908	RGS10	1	3	0.0174953
ENSG00000140285	FGF7	1	2	0.0175078
ENSG00000188582	PAQR9	1	4	0.0175313
ENSG00000161955	TNFSF13	1	1	0.0175422
ENSG00000089053	ANAPC5	2	15	0.017566
ENSG00000082641	NFE2L1	2	14	0.0177255
ENSG00000174721	FGFBP3	1	3	0.0177684
ENSG00000140931	CMTM3	1	3	0.01777
ENSG00000170558	CDH2	2	10	0.0177712
ENSG00000108688	CCL7	1	2	0.0179044
ENSG00000163900	TMEM41A	1	3	0.0179056
ENSG00000173660	UQCRH	1	4	0.0179096
ENSG00000112118	MCM3	1	3	0.0179216
ENSG00000126246	IGFLR1	1	3	0.0180156
ENSG00000167695	TLCD3A	1	3	0.0180814
ENSG00000176454	LPCAT4	1	4	0.018152
ENSG00000164062	APEH	1	4	0.018184
ENSG00000161692	DBF4B	1	3	0.0181841
ENSG00000185043	CIB1	1	3	0.0182308
ENSG00000131495	NDUFA2	1	3	0.0182671
ENSG00000205710	C17orf107	1	3	0.0183501
ENSG00000099812	MISP	2	15	0.0183957
ENSG00000119771	KLHL29	2	10	0.0184272
ENSG00000150540	HNMT	1	4	0.0185961
ENSG00000154920	EME1	1	5	0.0186187
ENSG00000177535	OR2B11	1	3	0.0186853
ENSG00000158411	MITD1	1	3	0.0187457
ENSG00000177728	TMEM94	2	13	0.0189165
ENSG00000149177	PTPRJ	2	12	0.0189178
ENSG00000187959	CPSF4L	1	2	0.018987
ENSG00000215915	ATAD3C	1	5	0.0190987
ENSG00000166068	SPRED1	1	3	0.0191041
ENSG00000165071	TMEM71	1	3	0.0191401
ENSG00000172456	FGGY	2	13	0.0191809
ENSG00000163599	CTLA4	1	1	0.0191855
ENSG00000131183	SLC34A1	2	12	0.0192586
ENSG00000113649	TCERG1	2	13	0.0192788
ENSG00000134690	CDCA8	1	2	0.0193464
ENSG00000162881	OXER1	1	2	0.0193677
ENSG00000157613	CREB3L1	1	3	0.019546
ENSG00000159708	LRRC36	1	3	0.0195603
ENSG00000174339	OR2Y1	1	2	0.0196342
ENSG00000110955	ATP5F1B	2	7	0.0196452
ENSG00000165609	NUDT5	1	6	0.0196597
ENSG00000181722	ZBTB20	2	12	0.0196786
ENSG00000164684	ZNF704	1	2	0.0198063
ENSG00000127884	ECHS1	1	3	0.0198295
ENSG00000135519	KCNH3	2	10	0.0199253
ENSG00000108953	YWHAE	1	3	0.0199556
ENSG00000181135	ZNF707	1	4	0.0200964
ENSG00000164045	CDC25A	1	3	0.020161
ENSG00000179909	ZNF154	1	2	0.0202037
ENSG00000174562	KLK15	1	3	0.0203234
ENSG00000173976	RAX2	1	4	0.0203385
ENSG00000168769	TET2	2	14	0.0203625
ENSG00000106305	AIMP2	1	3	0.0203672
ENSG00000101098	RIMS4	1	2	0.0204143
ENSG00000123374	CDK2	1	4	0.0204273
ENSG00000172086	KRCC1	1	4	0.0204352
ENSG00000112218	GPR63	1	4	0.0204682
ENSG00000169594	BNC1	2	15	0.0205464
ENSG00000124831	LRRFIP1	1	2	0.020631
ENSG00000178828	RNF186	1	4	0.0207307
ENSG00000164164	OTUD4	1	4	0.0207369
ENSG00000051128	HOMER3	1	4	0.0207458
ENSG00000149256	TENM4	3	33	0.0207481
ENSG00000197769	MAP1LC3C	1	4	0.020817
ENSG00000158286	RNF207	2	15	0.0208554
ENSG00000126391	FRMD8	1	4	0.0208607
ENSG00000168619	ADAM18	2	10	0.0208699
ENSG00000204673	AKT1S1	1	3	0.0209311
ENSG00000109881	CCDC34	1	3	0.0209982
ENSG00000105974	CAV1	1	2	0.0211821
ENSG00000132938	MTUS2	2	14	0.0211929
ENSG00000146414	SHPRH	2	17	0.0211972
ENSG00000159625	DRC7	2	12	0.0213541
ENSG00000139531	SUOX	1	3	0.0213611
ENSG00000183324	REC114	1	3	0.0213687
ENSG00000102119	EMD	1	5	0.0214012
ENSG00000096696	DSP	4	53	0.021454
ENSG00000151490	PTPRO	2	13	0.0214806
ENSG00000134207	SYT6	1	4	0.0214829
ENSG00000134153	EMC7	1	1	0.0214937
ENSG00000213689	TREX1	1	4	0.021497
ENSG00000110987	BCL7A	1	1	0.0215197
ENSG00000002919	SNX11	1	3	0.0216301
ENSG00000171823	FBXL14	1	3	0.0216573
ENSG00000156076	WIF1	1	2	0.0217987
ENSG00000185825	BCAP31	1	3	0.0218213
ENSG00000102897	LYRM1	1	4	0.0218379
ENSG00000187391	MAGI2	2	16	0.0218439
ENSG00000125970	RALY	1	3	0.0218803
ENSG00000196950	SLC39A10	1	4	0.021906
ENSG00000174137	FAM53A	1	4	0.0219401
ENSG00000160345	C9orf116	1	2	0.0219571
ENSG00000162704	ARPC5	1	3	0.0220245
ENSG00000145526	CDH18	1	5	0.0220712
ENSG00000178184	PARD6G	1	4	0.0221051
ENSG00000152592	DMP1	1	3	0.0221859
ENSG00000140259	MFAP1	1	4	0.0222054
ENSG00000105186	ANKRD27	2	17	0.022255
ENSG00000183762	KREMEN1	1	3	0.022283
ENSG00000183208	GDPGP1	1	4	0.022359
ENSG00000114270	COL7A1	3	33	0.0224576
ENSG00000066468	FGFR2	2	14	0.0224635
ENSG00000198108	CHSY3	1	4	0.0224757
ENSG00000130508	PXDN	3	26	0.0225303
ENSG00000173369	C1QB	1	4	0.0226238
ENSG00000163249	CCNYL1	1	4	0.022631
ENSG00000116819	TFAP2E	1	5	0.0226726
ENSG00000132612	VPS4A	1	3	0.022776
ENSG00000186442	KRT3	2	13	0.0227939
ENSG00000105507	CABP5	1	1	0.0228091
ENSG00000112159	MDN1	4	55	0.0228106
ENSG00000166908	PIP4K2C	1	4	0.0229179
ENSG00000111344	RASAL1	1	4	0.022976
ENSG00000152348	ATG10	1	5	0.0230403
ENSG00000197915	HRNR	1	4	0.0230796
ENSG00000165632	TAF3	1	5	0.0231694
ENSG00000170017	ALCAM	1	4	0.0232061
ENSG00000162627	SNX7	1	4	0.023238
ENSG00000047346	FAM214A	1	4	0.0232718
ENSG00000179832	MROH1	2	13	0.0233567
ENSG00000162873	KLHDC8A	1	4	0.0234184
ENSG00000196724	ZNF418	1	4	0.0234513
ENSG00000141200	KIF2B	2	16	0.0236763
ENSG00000180488	MIGA1	1	4	0.0236925
ENSG00000183172	SMDT1	1	4	0.0237169
ENSG00000144744	UBA3	1	4	0.0237462
ENSG00000114850	SSR3	1	3	0.0237724
ENSG00000112812	PRSS16	1	3	0.023775
ENSG00000111785	RIC8B	1	4	0.0238024
ENSG00000203995	ZYG11A	1	5	0.0238058
ENSG00000152990	ADGRA3	2	16	0.0238088
ENSG00000124784	RIOK1	1	4	0.0238151
ENSG00000168393	DTYMK	1	3	0.0238592
ENSG00000160505	NLRP4	2	17	0.0239264
ENSG00000152936	LMNTD1	1	3	0.0240142
ENSG00000099956	SMARCB1	1	4	0.0240483
ENSG00000163636	PSMD6	1	4	0.024089
ENSG00000160469	BRSK1	2	13	0.0242266
ENSG00000184933	OR6A2	1	3	0.0242843
ENSG00000196172	ZNF681	1	5	0.0242847
ENSG00000121310	ECHDC2	1	1	0.0242938
ENSG00000198301	SDAD1	1	4	0.0245607
ENSG00000171604	CXXC5	1	5	0.024563
ENSG00000198836	OPA1	1	5	0.0246422
ENSG00000140675	SLC5A2	2	17	0.024747
ENSG00000125835	SNRPB	1	2	0.0247937
ENSG00000129667	RHBDF2	2	18	0.0248623
ENSG00000154760	SLFN13	1	2	0.0249718
ENSG00000140092	FBLN5	1	4	0.025068
ENSG00000205667	ARSH	1	5	0.0250905
ENSG00000125510	OPRL1	1	4	0.0251606
ENSG00000153347	FAM81B	1	4	0.0252244
ENSG00000161973	CCDC42	1	4	0.0252529
ENSG00000187522	HSPA14	1	4	0.0253153
ENSG00000095637	SORBS1	2	15	0.0253808
ENSG00000125731	SH2D3A	1	4	0.0253936
ENSG00000185219	ZNF445	1	5	0.0254407
ENSG00000145103	ILDR1	1	6	0.0254756
ENSG00000182333	LIPF	1	3	0.0256006
ENSG00000182634	OR10G7	1	4	0.0256277
ENSG00000187242	KRT12	1	5	0.025787
ENSG00000114771	AADAC	1	4	0.0259441
ENSG00000188039	NWD1	3	31	0.0260118
ENSG00000130055	GDPD2	1	4	0.0260974
ENSG00000213512	GBP7	1	6	0.026214
ENSG00000134884	ARGLU1	1	5	0.026277
ENSG00000102144	PGK1	1	3	0.0262872
ENSG00000139645	ANKRD52	2	18	0.026337
ENSG00000170099	SERPINA6	1	4	0.0264645
ENSG00000170836	PPM1D	1	5	0.0264819
ENSG00000112818	MEP1A	1	3	0.0265025
ENSG00000142330	CAPN10	2	18	0.0265029
ENSG00000168539	CHRM1	1	4	0.0266797
ENSG00000172673	THEMIS	1	5	0.0267486
ENSG00000197619	ZNF615	1	5	0.0267706
ENSG00000185774	KCNIP4	1	4	0.0267997
ENSG00000137727	ARHGAP20	1	5	0.0268892
ENSG00000198816	ZNF358	1	4	0.0269116
ENSG00000177989	ODF3B	1	4	0.0269425
ENSG00000101856	PGRMC1	1	4	0.026947
ENSG00000159674	SPON2	1	4	0.0269788
ENSG00000006116	CACNG3	1	4	0.0271952
ENSG00000172772	OR10W1	1	5	0.0272892
ENSG00000183128	CALHM3	1	3	0.0273842
ENSG00000172819	RARG	1	5	0.027392
ENSG00000166819	PLIN1	1	5	0.0273945
ENSG00000159259	CHAF1B	1	4	0.0274167
ENSG00000149150	SLC43A1	1	4	0.027438
ENSG00000240694	PNMA2	1	4	0.0275653
ENSG00000213853	EMP2	1	5	0.0276138
ENSG00000167434	CA4	1	5	0.0276562
ENSG00000153574	RPIA	1	5	0.0277639
ENSG00000140829	DHX38	3	31	0.0277823
ENSG00000134910	STT3A	1	5	0.0279009
ENSG00000140526	ABHD2	1	4	0.0279497
ENSG00000170854	RIOX2	1	5	0.0280239
ENSG00000134765	DSC1	2	15	0.0280393
ENSG00000185504	FAAP100	2	17	0.0280741
ENSG00000120820	GLT8D2	1	5	0.0281111
ENSG00000188177	ZC3H6	2	18	0.0281205
ENSG00000100227	POLDIP3	1	3	0.0281397
ENSG00000102145	GATA1	1	4	0.0281894
ENSG00000127328	RAB3IP	1	4	0.0282215
ENSG00000129810	SGO1	1	5	0.0282474
ENSG00000176399	DMRTA1	1	4	0.0282743
ENSG00000108960	MMD	1	3	0.0283201
ENSG00000183166	CALN1	1	4	0.0283404
ENSG00000184434	LRRC19	1	4	0.0283966
ENSG00000188095	MESP2	1	5	0.0284249
ENSG00000152503	TRIM36	2	15	0.0284641
ENSG00000170289	CNGB3	2	12	0.0285302
ENSG00000153767	GTF2E1	1	4	0.0285461
ENSG00000146926	ASB10	2	17	0.0286342
ENSG00000077312	SNRPA	1	2	0.0286427
ENSG00000062370	ZNF112	1	5	0.0287594
ENSG00000143869	GDF7	1	4	0.0287626
ENSG00000114812	VIPR1	1	2	0.0287941
ENSG00000205784	ARRDC5	1	4	0.0287941
ENSG00000105281	SLC1A5	1	6	0.0288344
ENSG00000214050	FBXO16	1	4	0.0288382
ENSG00000162783	IER5	1	3	0.0288823
ENSG00000079277	MKNK1	1	5	0.0288932
ENSG00000177981	ASB8	1	5	0.0288967
ENSG00000011478	QPCTL	1	6	0.0290127
ENSG00000116001	TIA1	1	5	0.029188
ENSG00000123146	ADGRE5	2	13	0.0292492
ENSG00000144645	OSBPL10	1	2	0.0292536
ENSG00000120526	NUDCD1	1	5	0.0292617
ENSG00000213246	SUPT4H1	1	4	0.0292663
ENSG00000204564	C6orf136	1	5	0.0293151
ENSG00000106780	MEGF9	1	5	0.0293742
ENSG00000173124	ACSM6	1	4	0.0294561
ENSG00000174206	C12orf66	1	4	0.0295446
ENSG00000214530	STARD10	1	5	0.0296074
ENSG00000105270	CLIP3	1	4	0.0296415
ENSG00000092969	TGFB2	1	5	0.0297358
ENSG00000136156	ITM2B	1	5	0.0297367
ENSG00000148123	PLPPR1	1	2	0.0298649
ENSG00000119614	VSX2	1	6	0.0299127
ENSG00000181847	TIGIT	1	5	0.0299148
ENSG00000166856	GPR182	1	4	0.0300242
ENSG00000074964	ARHGEF10L	3	31	0.0300461
ENSG00000162836	ACP6	1	4	0.0300526
ENSG00000121741	ZMYM2	2	15	0.0300602
ENSG00000177455	CD19	1	3	0.0300677
ENSG00000138769	CDKL2	1	5	0.0301069
ENSG00000111832	RWDD1	1	5	0.0301509
ENSG00000035499	DEPDC1B	1	4	0.0301674
ENSG00000198081	ZBTB14	1	4	0.0301714
ENSG00000185483	ROR1	1	5	0.0302642
ENSG00000088247	KHSRP	2	16	0.0303027
ENSG00000120314	WDR55	1	3	0.0303943
ENSG00000131828	PDHA1	1	5	0.0304497
ENSG00000174233	ADCY6	2	20	0.0305165
ENSG00000189299	FOXR2	1	4	0.0305538
ENSG00000129455	KLK8	1	4	0.0305752
ENSG00000048540	LMO3	1	1	0.0306572
ENSG00000181264	TLCD5	1	2	0.0307028
ENSG00000139687	RB1	1	5	0.0308474
ENSG00000139797	RNF113B	1	4	0.0308717
ENSG00000152402	GUCY1A2	1	4	0.0309087
ENSG00000143149	ALDH9A1	1	4	0.0309132
ENSG00000131055	COX4I2	1	3	0.0309936
ENSG00000105246	EBI3	1	4	0.031006
ENSG00000128626	MRPS12	1	4	0.0310176
ENSG00000101955	SRPX	1	5	0.031042
ENSG00000172377	OR9I1	1	4	0.0310614
ENSG00000156150	ALX3	1	3	0.0312014
ENSG00000038210	PI4K2B	1	5	0.0313345
ENSG00000111639	MRPL51	1	0	0.0313856
ENSG00000149634	SPATA25	1	0	0.0313856
ENSG00000187808	SOWAHD	1	0	0.0313856
ENSG00000256269	HMBS	1	4	0.0314226
ENSG00000105538	RASIP1	1	4	0.0315691
ENSG00000161940	BCL6B	1	5	0.0315805
ENSG00000164167	LSM6	1	3	0.0316348
ENSG00000151360	ALLC	1	3	0.0317627
ENSG00000185947	ZNF267	1	5	0.0317731
ENSG00000165355	FBXO33	1	5	0.0318064
ENSG00000102804	TSC22D1	2	15	0.0318833
ENSG00000112238	PRDM13	1	6	0.0318851
ENSG00000128011	LRFN1	1	6	0.0319057
ENSG00000198087	CD2AP	1	5	0.03197
ENSG00000162040	HS3ST6	1	3	0.0319862
ENSG00000167112	TRUB2	1	2	0.0320145
ENSG00000170967	DDI1	1	5	0.0320329
ENSG00000155754	C2CD6	1	5	0.0320434
ENSG00000122592	HOXA7	1	5	0.0320435
ENSG00000130560	UBAC1	1	5	0.0320484
ENSG00000186458	DEFB132	1	4	0.0320501
ENSG00000003756	RBM5	1	5	0.0320563
ENSG00000188910	GJB3	1	5	0.0322309
ENSG00000107566	ERLIN1	1	1	0.0322435
ENSG00000075914	EXOSC7	1	3	0.032257
ENSG00000163873	GRIK3	2	16	0.0323028
ENSG00000187554	TLR5	1	6	0.0323882
ENSG00000139428	MMAB	1	4	0.03245
ENSG00000197454	OR2L5	1	5	0.0325518
ENSG00000108381	ASPA	1	5	0.0325651
ENSG00000143630	HCN3	1	5	0.0325859
ENSG00000187140	FOXD3	1	1	0.0327315
ENSG00000196917	HCAR1	2	20	0.0327859
ENSG00000074527	NTN4	1	6	0.0328068
ENSG00000065526	SPEN	4	47	0.0328127
ENSG00000014257	ACP3	1	6	0.0328177
ENSG00000136630	HLX	1	5	0.0328445
ENSG00000169727	GPS1	2	14	0.0329258
ENSG00000136937	NCBP1	1	4	0.0329476
ENSG00000137822	TUBGCP4	1	5	0.0329944
ENSG00000135297	MTO1	1	5	0.0329996
ENSG00000114491	UMPS	1	5	0.0330212
ENSG00000204590	GNL1	1	5	0.0331669
ENSG00000147573	TRIM55	1	6	0.0332093
ENSG00000182916	TCEAL7	1	4	0.0332354
ENSG00000127990	SGCE	1	6	0.0332718
ENSG00000167487	KLHL26	1	6	0.0332741
ENSG00000105193	RPS16	1	3	0.033283
ENSG00000240771	ARHGEF25	1	5	0.0333444
ENSG00000090447	TFAP4	1	5	0.0333457
ENSG00000162814	SPATA17	1	5	0.0333537
ENSG00000177731	FLII	2	15	0.0334154
ENSG00000172421	EFCAB3	1	4	0.0336908
ENSG00000106701	FSD1L	1	5	0.0337113
ENSG00000163006	CCDC138	1	5	0.0338145
ENSG00000181045	SLC26A11	1	6	0.0338163
ENSG00000155096	AZIN1	1	5	0.0338936
ENSG00000070495	JMJD6	1	5	0.0339152
ENSG00000187257	RSBN1L	1	5	0.0339377
ENSG00000171812	COL8A2	1	7	0.0340287
ENSG00000271303	SRXN1	1	5	0.034052
ENSG00000006025	OSBPL7	2	22	0.0340562
ENSG00000140153	WDR20	1	6	0.0341971
ENSG00000140718	FTO	1	5	0.0342291
ENSG00000130338	TULP4	3	37	0.0342774
ENSG00000124613	ZNF391	1	4	0.0342914
ENSG00000138029	HADHB	1	5	0.0344444
ENSG00000198298	ZNF485	1	5	0.03449
ENSG00000154451	GBP5	1	5	0.0344971
ENSG00000143217	NECTIN4	1	4	0.0345748
ENSG00000178038	ALS2CL	2	24	0.0346158
ENSG00000139648	KRT71	2	15	0.0346513
ENSG00000162877	PM20D1	1	5	0.0346635
ENSG00000099250	NRP1	2	16	0.0347335
ENSG00000086200	IPO11	1	6	0.0348314
ENSG00000185958	FAM186A	2	18	0.0348869
ENSG00000165915	SLC39A13	1	5	0.0350207
ENSG00000165474	GJB2	1	6	0.0350561
ENSG00000140538	NTRK3	2	20	0.0351768
ENSG00000162946	DISC1	1	5	0.0352484
ENSG00000183801	OLFML1	1	4	0.0353143
ENSG00000152684	PELO	1	3	0.0353802
ENSG00000186943	OR13C8	1	4	0.0354769
ENSG00000134987	WDR36	1	6	0.0354884
ENSG00000137656	BUD13	1	5	0.0355092
ENSG00000125304	TM9SF2	1	5	0.0355241
ENSG00000075461	CACNG4	1	6	0.0355792
ENSG00000148344	PTGES	1	1	0.0355843
ENSG00000198892	SHISA4	1	2	0.035666
ENSG00000055130	CUL1	1	5	0.0357498
ENSG00000161958	FGF11	1	6	0.0358562
ENSG00000101311	FERMT1	1	5	0.035864
ENSG00000104687	GSR	1	5	0.0359621
ENSG00000087008	ACOX3	2	18	0.0360153
ENSG00000159322	ADPGK	1	6	0.0361174
ENSG00000152193	OBI1	1	4	0.0361776
ENSG00000136840	ST6GALNAC4	1	6	0.0362347
ENSG00000214842	RAD51AP2	2	17	0.0363414
ENSG00000023839	ABCC2	2	20	0.0364381
ENSG00000179097	HTR1F	1	7	0.036487
ENSG00000205090	TMEM240	1	3	0.0365068
ENSG00000184990	SIVA1	1	5	0.0366386
ENSG00000172154	OR8I2	1	7	0.0367573
ENSG00000198382	UVRAG	1	6	0.0368025
ENSG00000064787	BCAS1	1	5	0.0368504
ENSG00000181408	UTS2R	1	6	0.0368922
ENSG00000175766	EIF4E1B	1	7	0.0368935
ENSG00000120907	ADRA1A	1	6	0.0371136
ENSG00000070366	SMG6	2	17	0.0371404
ENSG00000115211	EIF2B4	1	6	0.0371893
ENSG00000091137	SLC26A4	2	15	0.0372482
ENSG00000204348	DXO	1	7	0.0373834
ENSG00000154589	LY96	1	6	0.0374223
ENSG00000182670	TTC3	2	15	0.0375223
ENSG00000185090	MANEAL	1	6	0.0375312
ENSG00000108784	NAGLU	2	17	0.0375635
ENSG00000186297	GABRA5	1	6	0.0375872
ENSG00000052841	TTC17	2	19	0.0377206
ENSG00000140678	ITGAX	1	5	0.0377467
ENSG00000133119	RFC3	1	2	0.0379167
ENSG00000144848	ATG3	1	5	0.0379259
ENSG00000139610	CELA1	1	5	0.0379309
ENSG00000105486	LIG1	2	17	0.037941
ENSG00000100003	SEC14L2	1	5	0.037958
ENSG00000114739	ACVR2B	1	6	0.0379673
ENSG00000171298	GAA	2	21	0.038105
ENSG00000186230	ZNF749	1	5	0.0381425
ENSG00000023892	DEF6	1	6	0.0383312
ENSG00000138080	EMILIN1	1	6	0.0383517
ENSG00000105550	FGF21	1	7	0.0385132
ENSG00000116833	NR5A2	1	6	0.0385767
ENSG00000133401	PDZD2	3	39	0.0385822
ENSG00000178297	TMPRSS9	2	18	0.0386535
ENSG00000139508	SLC46A3	1	6	0.0387291
ENSG00000078053	AMPH	1	7	0.0388976
ENSG00000166359	WDR88	1	6	0.0388993
ENSG00000133317	LGALS12	1	5	0.0389245
ENSG00000120948	TARDBP	1	5	0.0389352
ENSG00000176919	C8G	1	7	0.038998
ENSG00000158089	GALNT14	1	6	0.0391863
ENSG00000107929	LARP4B	1	6	0.0392899
ENSG00000181733	OR2Z1	1	1	0.0393614
ENSG00000165476	REEP3	1	7	0.0394193
ENSG00000103671	TRIP4	1	5	0.0394488
ENSG00000183733	FIGLA	1	2	0.0395108
ENSG00000104951	IL4I1	1	5	0.0395395
ENSG00000141736	ERBB2	3	36	0.039623
ENSG00000153721	CNKSR3	1	3	0.0396425
ENSG00000140105	WARS1	1	8	0.0396951
ENSG00000100299	ARSA	1	5	0.0397063
ENSG00000143164	DCAF6	1	7	0.0397094
ENSG00000166578	IQCD	1	6	0.0397636
ENSG00000165120	SSMEM1	1	5	0.0398182
ENSG00000164970	FAM219A	1	7	0.0398946
ENSG00000156113	KCNMA1	2	18	0.0399247
ENSG00000204464	C1orf195	1	0	0.0400067
ENSG00000186687	LYRM7	1	5	0.0400368
ENSG00000136802	LRRC8A	2	14	0.0401273
ENSG00000168398	BDKRB2	1	6	0.040135
ENSG00000171747	LGALS4	1	6	0.0401993
ENSG00000183496	MEX3B	2	18	0.0402062
ENSG00000171522	PTGER4	1	6	0.0402437
ENSG00000039987	BEST2	1	5	0.0402923
ENSG00000185189	NRBP2	1	7	0.0403608
ENSG00000088280	ASAP3	1	8	0.0404426
ENSG00000118513	MYB	1	5	0.0404654
ENSG00000198931	APRT	1	3	0.0404804
ENSG00000104218	CSPP1	1	6	0.0405087
ENSG00000108797	CNTNAP1	2	23	0.0405542
ENSG00000160741	CRTC2	1	6	0.0406827
ENSG00000123500	COL10A1	1	5	0.0407222
ENSG00000135655	USP15	1	5	0.0407882
ENSG00000177542	SLC25A22	1	5	0.0408039
ENSG00000168724	DNAJC21	1	6	0.040851
ENSG00000189056	RELN	3	40	0.0409466
ENSG00000124212	PTGIS	1	6	0.0409496
ENSG00000197565	COL4A6	2	19	0.0410118
ENSG00000167332	OR51E2	1	6	0.0410192
ENSG00000147113	DIPK2B	1	5	0.0410657
ENSG00000165283	STOML2	1	6	0.0411263
ENSG00000121871	SLITRK3	1	8	0.0412126
ENSG00000166734	GOLM2	1	2	0.0413158
ENSG00000167281	RBFOX3	1	6	0.0414611
ENSG00000106624	AEBP1	2	13	0.0414736
ENSG00000204694	OR11A1	1	4	0.0415373
ENSG00000165623	UCMA	1	3	0.0415799
ENSG00000170396	ZNF804A	2	22	0.0416467
ENSG00000184939	ZFP90	1	6	0.0417304
ENSG00000239961	LILRA4	1	7	0.0417757
ENSG00000140743	CDR2	1	4	0.0418077
ENSG00000130037	KCNA5	1	6	0.0418543
ENSG00000178301	AQP11	1	1	0.0421058
ENSG00000126067	PSMB2	1	1	0.0421318
ENSG00000173674	EIF1AX	1	5	0.04217
ENSG00000237441	RGL2	1	6	0.0421936
ENSG00000092140	G2E3	1	5	0.0422381
ENSG00000139946	PELI2	1	6	0.0422549
ENSG00000023697	DERA	1	5	0.0424475
ENSG00000185739	SRL	1	5	0.0425228
ENSG00000197641	SERPINB13	1	6	0.0425402
ENSG00000197563	PIGN	1	6	0.0425662
ENSG00000122679	RAMP3	1	1	0.0426159
ENSG00000141905	NFIC	1	6	0.0426773
ENSG00000153292	ADGRF1	1	4	0.0427214
ENSG00000076650	GPATCH1	1	7	0.0427613
ENSG00000095303	PTGS1	1	5	0.0428356
ENSG00000170959	DCDC1	1	5	0.0429082
ENSG00000143514	TP53BP2	2	20	0.0429362
ENSG00000174460	ZCCHC12	1	7	0.0431201
ENSG00000101343	CRNKL1	1	9	0.043121
ENSG00000176371	ZSCAN2	1	7	0.0431309
ENSG00000179583	CIITA	2	19	0.0431655
ENSG00000169291	SHE	1	6	0.0431711
ENSG00000126522	ASL	1	6	0.0433288
ENSG00000164850	GPER1	1	4	0.0434249
ENSG00000167751	KLK2	1	5	0.0434853
ENSG00000148925	BTBD10	1	7	0.0435402
ENSG00000205593	DENND6B	1	5	0.0435962
ENSG00000173389	IQCF1	1	2	0.0439055
ENSG00000140067	FAM181A	1	5	0.0439237
ENSG00000104679	R3HCC1	1	7	0.0439373
ENSG00000018510	AGPS	1	5	0.0440676
ENSG00000249581	CLRN2	1	6	0.044225
ENSG00000198739	LRRTM3	1	6	0.0442494
ENSG00000065325	GLP2R	1	3	0.0443357
ENSG00000116039	ATP6V1B1	1	6	0.0443369
ENSG00000143486	EIF2D	1	7	0.0444147
ENSG00000152242	C18orf25	1	6	0.0446404
ENSG00000100083	GGA1	1	5	0.0447132
ENSG00000116996	ZP4	1	6	0.0447697
ENSG00000135222	CSN2	1	5	0.0448107
ENSG00000156304	SCAF4	1	6	0.0448568
ENSG00000145916	RMND5B	1	6	0.0448816
ENSG00000131981	LGALS3	1	5	0.0449243
ENSG00000006695	COX10	1	6	0.0450714
ENSG00000162408	NOL9	1	7	0.0450838
ENSG00000107263	RAPGEF1	2	17	0.0451443
ENSG00000123179	EBPL	1	2	0.0452636
ENSG00000181544	FANCB	1	6	0.0456609
ENSG00000150403	TMCO3	1	6	0.045693
ENSG00000166311	SMPD1	1	7	0.0457481
ENSG00000186119	OR5D18	1	5	0.0458593
ENSG00000196924	FLNA	4	62	0.0458798
ENSG00000177992	SPATA31E1	1	8	0.0459797
ENSG00000170745	KCNS3	2	18	0.0459848
ENSG00000162496	DHRS3	1	7	0.046038
ENSG00000172901	LVRN	1	6	0.0460432
ENSG00000138617	PARP16	1	3	0.0460446
ENSG00000170954	ZNF415	1	6	0.0460608
ENSG00000143340	FAM163A	1	4	0.046171
ENSG00000110367	DDX6	1	7	0.0462559
ENSG00000164466	SFXN1	1	6	0.0463062
ENSG00000161642	ZNF385A	1	6	0.0463114
ENSG00000154144	TBRG1	1	6	0.0463578
ENSG00000099985	OSM	1	3	0.0465559
ENSG00000185053	SGCZ	1	4	0.0466789
ENSG00000171495	MROH2B	2	24	0.0466967
ENSG00000172201	ID4	1	5	0.0467035
ENSG00000163219	ARHGAP25	1	6	0.0468053
ENSG00000164323	CFAP97	1	5	0.0468426
ENSG00000079805	DNM2	2	22	0.0468647
ENSG00000093217	XYLB	1	3	0.0468673
ENSG00000168517	HEXIM2	1	6	0.0469027
ENSG00000125149	C16orf70	1	6	0.0470146
ENSG00000139567	ACVRL1	1	8	0.0470244
ENSG00000167105	TMEM92	1	5	0.0471298
ENSG00000162924	REL	1	7	0.0471629
ENSG00000153207	AHCTF1	1	7	0.0471836
ENSG00000186867	QRFPR	1	7	0.0472833
ENSG00000046604	DSG2	2	24	0.0473621
ENSG00000253485	PCDHGA5	2	19	0.0473839
ENSG00000150627	WDR17	1	7	0.0474151
ENSG00000167261	DPEP2	1	5	0.0474687
ENSG00000148584	A1CF	1	6	0.0474818
ENSG00000186334	SLC36A3	1	7	0.0476551
ENSG00000074319	TSG101	1	5	0.0477603
ENSG00000105063	PPP6R1	2	24	0.047809
ENSG00000158955	WNT9B	1	7	0.0479197
ENSG00000101152	DNAJC5	1	8	0.0480731
ENSG00000128271	ADORA2A	1	7	0.048226
ENSG00000134262	AP4B1	1	7	0.0483255
ENSG00000157450	RNF111	1	7	0.0483945
ENSG00000004866	ST7	1	7	0.0484699
ENSG00000183576	SETD3	1	6	0.04848
ENSG00000174405	LIG4	1	2	0.0485603
ENSG00000145780	FEM1C	1	6	0.0485882
ENSG00000009724	MASP2	1	9	0.048688
ENSG00000179603	GRM8	1	8	0.0487071
ENSG00000110841	PPFIBP1	1	7	0.0487743
ENSG00000198522	GPN1	1	6	0.0488219
ENSG00000103199	ZNF500	2	19	0.048898
ENSG00000139323	POC1B	1	6	0.0489213
ENSG00000050748	MAPK9	1	5	0.0489608
ENSG00000244617	ASPRV1	1	6	0.0489684
ENSG00000177830	CHID1	1	7	0.048984
ENSG00000135702	CHST5	1	7	0.049039
ENSG00000122729	ACO1	1	9	0.0490538
ENSG00000009307	CSDE1	2	17	0.0494316
ENSG00000114841	DNAH1	4	70	0.0496172
ENSG00000117501	MROH9	1	5	0.0496439
ENSG00000167711	SERPINF2	1	6	0.0497577
ENSG00000168209	DDIT4	1	5	0.0497696
ENSG00000160323	ADAMTS13	1	6	0.0497855
ENSG00000151458	ANKRD50	2	18	0.0498253
ENSG00000117859	OSBPL9	1	7	0.0499088
ENSG00000239732	TLR9	2	25	0.0499144
ENSG00000140386	SCAPER	2	19	0.0500112
ENSG00000154114	TBCEL	1	7	0.0501004
ENSG00000198642	KLHL9	1	8	0.0506252
ENSG00000188385	JAKMIP3	2	18	0.050686
ENSG00000116747	RO60	1	5	0.0508014
ENSG00000011114	BTBD7	1	7	0.0509802
ENSG00000147206	NXF3	1	7	0.0510358
ENSG00000069535	MAOB	1	2	0.0510543
ENSG00000136869	TLR4	1	7	0.0510594
ENSG00000121988	ZRANB3	2	23	0.0510874
ENSG00000095059	DHPS	1	8	0.0511087
ENSG00000182795	C1orf116	1	8	0.0511271
ENSG00000179299	NSUN7	1	8	0.0511826
ENSG00000130511	SSBP4	1	2	0.0512071
ENSG00000183049	CAMK1D	1	8	0.0513176
ENSG00000132510	KDM6B	2	25	0.0513444
ENSG00000169925	BRD3	2	23	0.051346
ENSG00000215045	GRID2IP	2	19	0.0513589
ENSG00000134042	MRO	1	8	0.0513641
ENSG00000059573	ALDH18A1	1	8	0.051421
ENSG00000163879	DNALI1	1	6	0.051614
ENSG00000124228	DDX27	1	6	0.0517073
ENSG00000126861	OMG	1	3	0.0517534
ENSG00000145192	AHSG	1	9	0.0518623
ENSG00000164508	H2AC1	1	5	0.0519254
ENSG00000107362	ABHD17B	1	6	0.0519268
ENSG00000159640	ACE	2	21	0.0520023
ENSG00000170486	KRT72	1	6	0.0523385
ENSG00000117983	MUC5B	4	71	0.0524707
ENSG00000188130	MAPK12	1	7	0.0526549
ENSG00000094880	CDC23	1	8	0.0527309
ENSG00000177938	CAPZA3	1	7	0.0527352
ENSG00000164776	PHKG1	1	7	0.0528019
ENSG00000133863	TEX15	2	22	0.0529143
ENSG00000042832	TG	4	65	0.0530408
ENSG00000066933	MYO9A	2	19	0.053073
ENSG00000171456	ASXL1	2	24	0.0531364
ENSG00000184012	TMPRSS2	1	7	0.0532063
ENSG00000188770	OPTC	1	9	0.0532403
ENSG00000041353	RAB27B	1	2	0.0532838
ENSG00000165409	TSHR	1	7	0.0533276
ENSG00000158528	PPP1R9A	1	8	0.0533681
ENSG00000170325	PRDM10	2	21	0.0533787
ENSG00000160994	CCDC105	1	3	0.0534139
ENSG00000150753	CCT5	1	6	0.0536012
ENSG00000185024	BRF1	2	22	0.0536275
ENSG00000168826	ZBTB49	1	8	0.0538147
ENSG00000135503	ACVR1B	1	7	0.053824
ENSG00000171502	COL24A1	2	25	0.0538318
ENSG00000116748	AMPD1	1	5	0.0538442
ENSG00000081181	ARG2	1	2	0.0539194
ENSG00000188394	GPR21	2	6	0.0539275
ENSG00000044574	HSPA5	1	8	0.0539435
ENSG00000221931	OR6X1	1	7	0.0540468
ENSG00000103591	AAGAB	1	7	0.0540986
ENSG00000115488	NEU2	1	7	0.0541817
ENSG00000166037	CEP57	1	8	0.0542153
ENSG00000204475	NCR3	1	8	0.0542388
ENSG00000174444	RPL4	1	9	0.0543676
ENSG00000179388	EGR3	1	8	0.0543996
ENSG00000178927	CYBC1	1	6	0.0544247
ENSG00000188064	WNT7B	1	7	0.054516
ENSG00000160191	PDE9A	1	6	0.054622
ENSG00000101040	ZMYND8	2	19	0.0546511
ENSG00000197601	FAR1	1	4	0.0546761
ENSG00000170653	ATF7	1	5	0.054714
ENSG00000189433	GJB4	1	7	0.0547363
ENSG00000124942	AHNAK	4	67	0.0549406
ENSG00000197275	RAD54B	1	6	0.055005
ENSG00000137807	KIF23	1	6	0.055061
ENSG00000134909	ARHGAP32	2	27	0.0551615
ENSG00000100813	ACIN1	2	19	0.0551749
ENSG00000160410	SHKBP1	1	9	0.0552205
ENSG00000138615	CILP	1	7	0.055326
ENSG00000007908	SELE	1	9	0.0556804
ENSG00000196476	C20orf96	1	5	0.0556842
ENSG00000114030	KPNA1	1	7	0.0557127
ENSG00000116903	EXOC8	1	7	0.0557148
ENSG00000136247	ZDHHC4	1	7	0.055976
ENSG00000105778	AVL9	1	6	0.0559864
ENSG00000213160	KLHL23	1	6	0.0559912
ENSG00000105852	PON3	1	2	0.0561787
ENSG00000164535	DAGLB	1	7	0.0564811
ENSG00000254245	PCDHGA3	2	17	0.056535
ENSG00000135929	CYP27A1	1	7	0.0565624
ENSG00000141527	CARD14	2	22	0.0567999
ENSG00000198093	ZNF649	1	6	0.0568584
ENSG00000141428	C18orf21	1	2	0.0569689
ENSG00000197935	ZNF311	1	7	0.0569758
ENSG00000108395	TRIM37	1	9	0.0571084
ENSG00000167325	RRM1	1	9	0.0571194
ENSG00000214491	SEC14L6	1	8	0.0571821
ENSG00000106799	TGFBR1	1	7	0.0573063
ENSG00000217236	SP9	1	9	0.0573385
ENSG00000169045	HNRNPH1	1	8	0.0573489
ENSG00000165091	TMC1	1	6	0.0575171
ENSG00000121989	ACVR2A	1	7	0.0575484
ENSG00000166816	LDHD	1	6	0.0575488
ENSG00000146122	DAAM2	2	20	0.0575636
ENSG00000146063	TRIM41	1	9	0.0575922
ENSG00000113119	TMCO6	1	7	0.0576464
ENSG00000135443	KRT85	1	7	0.0580663
ENSG00000173705	SUSD5	1	7	0.058144
ENSG00000129292	PHF20L1	1	8	0.0582099
ENSG00000167754	KLK5	1	7	0.0582993
ENSG00000101146	RAE1	1	7	0.0583477
ENSG00000083807	SLC27A5	1	10	0.0583489
ENSG00000007129	CEACAM21	1	3	0.0583538
ENSG00000165953	SERPINA12	1	9	0.0583538
ENSG00000138286	FAM149B1	1	4	0.0584436
ENSG00000123191	ATP7B	2	26	0.0586524
ENSG00000100139	MICALL1	1	7	0.0587841
ENSG00000182095	TNRC18	1	8	0.0590284
ENSG00000049769	PPP1R3F	1	4	0.0591125
ENSG00000168418	KCNG4	1	10	0.0591688
ENSG00000198380	GFPT1	1	8	0.0591722
ENSG00000033327	GAB2	1	8	0.059185
ENSG00000107447	DNTT	1	7	0.0592506
ENSG00000128513	POT1	1	8	0.059371
ENSG00000099625	CBARP	1	7	0.0594429
ENSG00000134775	FHOD3	2	16	0.0595542
ENSG00000115107	STEAP3	1	9	0.0596212
ENSG00000110324	IL10RA	1	8	0.0597233
ENSG00000055732	MCOLN3	1	8	0.0600492
ENSG00000137054	POLR1E	1	6	0.0602313
ENSG00000135744	AGT	1	8	0.0603125
ENSG00000091640	SPAG7	1	5	0.0603502
ENSG00000051382	PIK3CB	2	26	0.060441
ENSG00000141506	PIK3R5	1	9	0.0604991
ENSG00000154358	OBSCN	7	153	0.0605345
ENSG00000187715	KBTBD12	1	7	0.0605849
ENSG00000088756	ARHGAP28	1	6	0.0605973
ENSG00000027847	B4GALT7	1	8	0.0606153
ENSG00000089876	DHX32	1	7	0.0606433
ENSG00000137204	SLC22A7	1	3	0.0606901
ENSG00000010319	SEMA3G	1	9	0.0608514
ENSG00000120889	TNFRSF10B	1	8	0.0609535
ENSG00000105520	PLPPR2	1	5	0.0609877
ENSG00000197608	ZNF841	1	7	0.0610515
ENSG00000198160	MIER1	1	5	0.0610989
ENSG00000146047	H2BC1	1	8	0.0611518
ENSG00000137675	MMP27	1	5	0.0611876
ENSG00000127191	TRAF2	1	10	0.0612751
ENSG00000158458	NRG2	1	6	0.0614531
ENSG00000159873	CCDC117	1	9	0.0616661
ENSG00000065485	PDIA5	1	7	0.0617125
ENSG00000100997	ABHD12	1	7	0.0617211
ENSG00000114019	AMOTL2	1	7	0.0617226
ENSG00000179021	C3orf38	1	5	0.0617942
ENSG00000137497	NUMA1	2	27	0.0618297
ENSG00000132819	RBM38	1	8	0.0618673
ENSG00000101425	BPI	1	9	0.0619911
ENSG00000184408	KCND2	1	6	0.0625016
ENSG00000164142	FAM160A1	1	6	0.0625325
ENSG00000143951	WDPCP	1	8	0.0627587
ENSG00000141562	NARF	1	7	0.0628404
ENSG00000160838	LRRC71	1	4	0.0628959
ENSG00000117620	SLC35A3	1	8	0.0630195
ENSG00000070756	PABPC1	1	8	0.0630992
ENSG00000135577	NMBR	1	9	0.063203
ENSG00000135914	HTR2B	1	4	0.063235
ENSG00000013523	ANGEL1	1	6	0.0633294
ENSG00000116906	GNPAT	1	8	0.0633571
ENSG00000166004	CEP295	2	21	0.0636754
ENSG00000150990	DHX37	2	21	0.0642063
ENSG00000176783	RUFY1	1	9	0.0642527
ENSG00000160194	NDUFV3	1	8	0.0642758
ENSG00000103647	CORO2B	1	9	0.0643576
ENSG00000164941	INTS8	1	7	0.0643807
ENSG00000124702	KLHDC3	1	8	0.0644263
ENSG00000170820	FSHR	1	8	0.0644499
ENSG00000132357	CARD6	1	8	0.0645324
ENSG00000064655	EYA2	1	10	0.0645608
ENSG00000213782	DDX47	1	8	0.0646203
ENSG00000160679	CHTOP	1	9	0.0646281
ENSG00000073756	PTGS2	1	7	0.0646514
ENSG00000123983	ACSL3	1	3	0.0647199
ENSG00000105516	DBP	1	4	0.0648745
ENSG00000241839	PLEKHO2	1	7	0.064893
ENSG00000261934	PCDHGA9	1	9	0.0651041
ENSG00000115317	HTRA2	1	7	0.0651607
ENSG00000166262	FAM227B	1	9	0.0651627
ENSG00000101181	MTG2	1	8	0.0652157
ENSG00000145247	OCIAD2	1	3	0.0652621
ENSG00000140543	DET1	1	8	0.0653198
ENSG00000066923	STAG3	1	10	0.0654264
ENSG00000156535	CD109	2	14	0.0654795
ENSG00000124788	ATXN1	2	24	0.0656648
ENSG00000169221	TBC1D10B	1	9	0.065707
ENSG00000196878	LAMB3	2	28	0.0657263
ENSG00000141030	COPS3	1	7	0.0657273
ENSG00000096063	SRPK1	1	7	0.0658522
ENSG00000175115	PACS1	1	11	0.066081
ENSG00000204291	COL15A1	2	26	0.0660903
ENSG00000141644	MBD1	1	9	0.0660956
ENSG00000176476	SGF29	1	8	0.0661213
ENSG00000065427	KARS1	1	8	0.0661233
ENSG00000040199	PHLPP2	2	26	0.0661452
ENSG00000144028	SNRNP200	2	24	0.0661916
ENSG00000178567	EPM2AIP1	1	8	0.066263
ENSG00000163848	ZNF148	1	8	0.0664811
ENSG00000103496	STX4	1	4	0.0666666
ENSG00000131148	EMC8	1	9	0.0667984
ENSG00000103310	ZP2	1	7	0.0668436
ENSG00000149573	MPZL2	1	5	0.0668629
ENSG00000197208	SLC22A4	1	9	0.0668683
ENSG00000165084	C8orf34	1	9	0.0670164
ENSG00000198633	ZNF534	1	9	0.0670489
ENSG00000114654	EFCC1	1	8	0.0671385
ENSG00000185697	MYBL1	1	6	0.0673652
ENSG00000184860	SDR42E1	1	7	0.067406
ENSG00000130881	LRP3	1	10	0.0677266
ENSG00000100241	SBF1	3	45	0.067742
ENSG00000173612	GPRC6A	1	8	0.0678353
ENSG00000132915	PDE6A	1	9	0.0679386
ENSG00000122420	PTGFR	1	6	0.0679766
ENSG00000215271	HOMEZ	1	10	0.0681878
ENSG00000131849	ZNF132	1	8	0.0682156
ENSG00000170743	SYT9	1	6	0.0685113
ENSG00000107372	ZFAND5	1	6	0.068576
ENSG00000115970	THADA	2	29	0.0686863
ENSG00000183255	PTTG1IP	1	5	0.0687763
ENSG00000109819	PPARGC1A	1	6	0.0689563
ENSG00000021300	PLEKHB1	1	4	0.0691376
ENSG00000179119	SPTY2D1	1	5	0.0692946
ENSG00000137462	TLR2	1	9	0.0693271
ENSG00000069998	HDHD5	1	7	0.0693448
ENSG00000173039	RELA	1	7	0.0694021
ENSG00000145882	PCYOX1L	1	10	0.0694529
ENSG00000136193	SCRN1	1	9	0.0694884
ENSG00000105122	RASAL3	1	9	0.0695087
ENSG00000168268	NT5DC2	1	9	0.0696029
ENSG00000128849	CGNL1	1	11	0.0697411
ENSG00000110911	SLC11A2	1	10	0.0698766
ENSG00000185105	MYADML2	1	9	0.0699198
ENSG00000166801	FAM111A	1	8	0.0699433
ENSG00000163214	DHX57	2	19	0.0699966
ENSG00000110330	BIRC2	1	8	0.0700954
ENSG00000124657	OR2B6	1	5	0.0701058
ENSG00000196367	TRRAP	4	71	0.070278
ENSG00000051341	POLQ	2	21	0.0702938
ENSG00000119777	TMEM214	1	4	0.070318
ENSG00000111860	CEP85L	1	7	0.0703757
ENSG00000158079	PTPDC1	1	7	0.0704067
ENSG00000158055	GRHL3	1	9	0.0707865
ENSG00000143847	PPFIA4	1	10	0.0709991
ENSG00000112706	IMPG1	1	11	0.0710584
ENSG00000156050	FAM161B	1	6	0.0711002
ENSG00000149346	SLX4IP	1	11	0.0714721
ENSG00000109118	PHF12	1	11	0.071488
ENSG00000259207	ITGB3	1	10	0.0715135
ENSG00000150991	UBC	1	8	0.0715651
ENSG00000254087	LYN	1	8	0.0716277
ENSG00000159723	AGRP	1	8	0.0716667
ENSG00000102098	SCML2	1	3	0.0717205
ENSG00000141452	RMC1	1	10	0.0717285
ENSG00000137942	FNBP1L	1	6	0.0718101
ENSG00000128283	CDC42EP1	1	10	0.0718722
ENSG00000173908	KRT28	1	8	0.0719905
ENSG00000135999	EPC2	1	9	0.0721652
ENSG00000118217	ATF6	1	8	0.0721826
ENSG00000132842	AP3B1	1	8	0.0722005
ENSG00000171360	KRT38	1	9	0.0722968
ENSG00000153201	RANBP2	1	9	0.0723459
ENSG00000251692	PTX4	1	9	0.0724837
ENSG00000087299	L2HGDH	1	9	0.0726111
ENSG00000205835	GMNC	1	2	0.072687
ENSG00000100523	DDHD1	1	9	0.0727408
ENSG00000156709	AIFM1	1	8	0.0727781
ENSG00000143258	USP21	1	10	0.0728535
ENSG00000096264	NCR2	1	6	0.0728706
ENSG00000143476	DTL	1	10	0.0729695
ENSG00000198842	STYXL2	2	28	0.0729973
ENSG00000008311	AASS	1	8	0.073
ENSG00000148604	RGR	1	9	0.0730024
ENSG00000136944	LMX1B	1	9	0.0730189
ENSG00000125846	ZNF133	1	9	0.0730578
ENSG00000187758	ADH1A	1	6	0.0731989
ENSG00000136002	ARHGEF4	1	8	0.0732189
ENSG00000073584	SMARCE1	1	8	0.0732444
ENSG00000173757	STAT5B	1	11	0.073598
ENSG00000011260	UTP18	1	8	0.073656
ENSG00000078618	NRDC	1	7	0.0737092
ENSG00000108370	RGS9	1	8	0.0737434
ENSG00000169991	IFFO2	1	8	0.0737744
ENSG00000163069	SGCB	1	9	0.0743794
ENSG00000068001	HYAL2	1	9	0.0745333
ENSG00000185324	CDK10	1	8	0.0745406
ENSG00000064313	TAF2	1	7	0.0747988
ENSG00000185215	TNFAIP2	1	9	0.0748327
ENSG00000163394	CCKAR	1	9	0.075008
ENSG00000188089	PLA2G4E	1	7	0.0751256
ENSG00000166924	NYAP1	1	9	0.0752269
ENSG00000172349	IL16	1	9	0.0753
ENSG00000204624	DISP3	2	25	0.0753645
ENSG00000140297	GCNT3	1	8	0.0754019
ENSG00000183035	CYLC1	1	10	0.0754643
ENSG00000100239	PPP6R2	1	8	0.0754924
ENSG00000170265	ZNF282	1	6	0.0755562
ENSG00000152377	SPOCK1	1	9	0.0755614
ENSG00000145388	METTL14	1	5	0.0755963
ENSG00000206432	TMEM200C	1	4	0.0756384
ENSG00000214013	GANC	1	10	0.075664
ENSG00000135218	CD36	1	5	0.0757689
ENSG00000107338	SHB	1	11	0.0759117
ENSG00000171608	PIK3CD	2	26	0.0759514
ENSG00000065491	TBC1D22B	1	5	0.0761221
ENSG00000143416	SELENBP1	1	9	0.0761684
ENSG00000063015	SEZ6	1	8	0.0763487
ENSG00000142233	NTN5	1	6	0.0764076
ENSG00000204394	VARS1	1	9	0.0764124
ENSG00000077274	CAPN6	1	9	0.0764965
ENSG00000134744	TUT4	1	7	0.0765359
ENSG00000104714	ERICH1	1	11	0.0766774
ENSG00000172935	MRGPRF	1	8	0.0768945
ENSG00000163811	WDR43	1	10	0.0769416
ENSG00000143493	INTS7	1	7	0.0771283
ENSG00000171044	XKR6	1	9	0.0773175
ENSG00000249709	ZNF564	1	9	0.0773668
ENSG00000118503	TNFAIP3	1	8	0.0774749
ENSG00000164299	SPZ1	1	9	0.0775203
ENSG00000100941	PNN	1	6	0.0776057
ENSG00000165219	GAPVD1	1	11	0.077786
ENSG00000088298	EDEM2	1	9	0.0779172
ENSG00000130811	EIF3G	1	8	0.077923
ENSG00000183379	SYNDIG1L	1	4	0.0779451
ENSG00000111181	SLC6A12	2	13	0.0780078
ENSG00000152642	GPD1L	1	10	0.078044
ENSG00000135355	GJA10	1	10	0.078076
ENSG00000137770	CTDSPL2	1	9	0.0781448
ENSG00000142197	DOP1B	3	45	0.0783331
ENSG00000152409	JMY	1	10	0.0787627
ENSG00000143036	SLC44A3	1	9	0.0788481
ENSG00000167676	PLIN4	2	26	0.0790075
ENSG00000144909	OSBPL11	1	11	0.0792144
ENSG00000181472	ZBTB2	1	8	0.0793017
ENSG00000188869	TMC3	1	10	0.0793606
ENSG00000185686	PRAME	1	11	0.0798043
ENSG00000140104	CLBA1	1	8	0.0798661
ENSG00000083097	DOP1A	1	11	0.0798686
ENSG00000213699	SLC35F6	1	10	0.0799649
ENSG00000073067	CYP2W1	1	8	0.0799875
ENSG00000148053	NTRK2	1	10	0.0800471
ENSG00000119707	RBM25	1	8	0.0801706
ENSG00000090432	MUL1	1	10	0.0802441
ENSG00000149646	CNBD2	1	10	0.0803334
ENSG00000101384	JAG1	2	27	0.0804165
ENSG00000157388	CACNA1D	3	41	0.0806313
ENSG00000133962	CATSPERB	1	9	0.0806616
ENSG00000139330	KERA	1	10	0.0808395
ENSG00000123989	CHPF	1	10	0.0809894
ENSG00000112419	PHACTR2	1	5	0.0810681
ENSG00000080618	CPB2	1	11	0.0811032
ENSG00000204687	MAS1L	1	10	0.0811147
ENSG00000118193	KIF14	1	9	0.0811345
ENSG00000159086	PAXBP1	1	10	0.0811365
ENSG00000152705	CATSPER3	1	10	0.081245
ENSG00000015171	ZMYND11	1	9	0.081341
ENSG00000107611	CUBN	3	38	0.0814178
ENSG00000120498	TEX11	1	11	0.0814781
ENSG00000110395	CBL	1	10	0.0814965
ENSG00000121446	RGSL1	1	10	0.0815377
ENSG00000141098	GFOD2	1	9	0.0815918
ENSG00000160305	DIP2A	2	27	0.081941
ENSG00000121940	CLCC1	1	10	0.082045
ENSG00000112303	VNN2	1	9	0.0822341
ENSG00000111684	LPCAT3	1	5	0.0822684
ENSG00000117000	RLF	1	11	0.0823032
ENSG00000107331	ABCA2	4	64	0.0824398
ENSG00000125810	CD93	1	10	0.0827585
ENSG00000093009	CDC45	1	11	0.0828402
ENSG00000158402	CDC25C	1	11	0.0830334
ENSG00000008405	CRY1	1	8	0.0830954
ENSG00000244607	CCDC13	1	9	0.0831042
ENSG00000100401	RANGAP1	1	10	0.0831109
ENSG00000157150	TIMP4	1	8	0.0831412
ENSG00000135842	NIBAN1	1	7	0.0831887
ENSG00000067066	SP100	1	10	0.083232
ENSG00000107960	STN1	1	7	0.0834027
ENSG00000130385	BMP15	1	4	0.0835973
ENSG00000170949	ZNF160	1	9	0.0837343
ENSG00000187003	ACTL7A	1	9	0.0838024
ENSG00000169169	CPT1C	1	12	0.0839686
ENSG00000141497	ZMYND15	1	8	0.08409
ENSG00000107164	FUBP3	1	8	0.0841124
ENSG00000157890	MEGF11	2	26	0.0841317
ENSG00000167601	AXL	1	9	0.0841549
ENSG00000166226	CCT2	1	11	0.0847603
ENSG00000204536	CCHCR1	1	10	0.0848727
ENSG00000126243	LRFN3	1	9	0.0849742
ENSG00000171954	CYP4F22	1	9	0.0850519
ENSG00000160993	ALKBH4	1	9	0.0850766
ENSG00000169515	CCDC8	1	5	0.0852685
ENSG00000088367	EPB41L1	1	8	0.0856625
ENSG00000023516	AKAP11	1	11	0.0857966
ENSG00000111206	FOXM1	1	11	0.0859495
ENSG00000119714	GPR68	1	8	0.0859669
ENSG00000138032	PPM1B	1	10	0.0859844
ENSG00000112667	DNPH1	1	5	0.0860515
ENSG00000122224	LY9	1	5	0.0860674
ENSG00000039650	PNKP	1	10	0.086098
ENSG00000123143	PKN1	1	11	0.0863458
ENSG00000256525	POLG2	1	9	0.0863559
ENSG00000103035	PSMD7	1	7	0.0864958
ENSG00000119669	IRF2BPL	1	10	0.0866062
ENSG00000122375	OPN4	1	8	0.0866172
ENSG00000127483	HP1BP3	1	10	0.0866208
ENSG00000215912	TTC34	1	10	0.0866849
ENSG00000185985	SLITRK2	1	10	0.0867052
ENSG00000054392	HHAT	1	8	0.086817
ENSG00000165525	NEMF	1	11	0.0868599
ENSG00000177511	ST8SIA3	1	10	0.0869321
ENSG00000198917	SPOUT1	1	9	0.0872382
ENSG00000116017	ARID3A	1	8	0.0873088
ENSG00000102531	FNDC3A	1	11	0.0878645
ENSG00000110693	SOX6	1	10	0.0879074
ENSG00000133460	SLC2A11	1	9	0.0879182
ENSG00000084731	KIF3C	1	10	0.0879949
ENSG00000121577	POPDC2	1	11	0.0880985
ENSG00000143520	FLG2	2	26	0.0881349
ENSG00000164675	IQUB	1	8	0.0884147
ENSG00000149635	OCSTAMP	1	10	0.0884331
ENSG00000115363	EVA1A	1	9	0.0884914
ENSG00000179148	ALOXE3	1	10	0.0884985
ENSG00000100297	MCM5	1	11	0.0885619
ENSG00000138750	NUP54	1	9	0.0886097
ENSG00000197591	OR11L1	1	9	0.0886785
ENSG00000177398	UMODL1	2	31	0.0886839
ENSG00000100593	ISM2	1	9	0.0887076
ENSG00000112164	GLP1R	1	9	0.0887246
ENSG00000078699	CBFA2T2	1	12	0.0887351
ENSG00000157851	DPYSL5	1	10	0.0888195
ENSG00000173227	SYT12	1	11	0.0888204
ENSG00000167210	LOXHD1	2	30	0.0889413
ENSG00000111554	MDM1	1	10	0.0890183
ENSG00000135436	FAM186B	1	11	0.0890938
ENSG00000115641	FHL2	1	4	0.0891954
ENSG00000089639	GMIP	1	9	0.0892566
ENSG00000105953	OGDH	1	9	0.0893502
ENSG00000079950	STX7	1	8	0.0894109
ENSG00000144671	SLC22A14	1	6	0.0896047
ENSG00000165699	TSC1	1	9	0.0897324
ENSG00000141569	TRIM65	1	12	0.0901378
ENSG00000147596	PRDM14	1	9	0.0902841
ENSG00000135917	SLC19A3	1	10	0.0903804
ENSG00000170190	SLC16A5	1	10	0.0906062
ENSG00000163749	CCDC158	1	11	0.0906428
ENSG00000204969	PCDHA2	1	11	0.0908756
ENSG00000070413	DGCR2	1	10	0.0909924
ENSG00000166188	ZNF319	1	4	0.0912936
ENSG00000124222	STX16	1	10	0.0914333
ENSG00000137962	ARHGAP29	1	12	0.0914589
ENSG00000107560	RAB11FIP2	1	12	0.0915759
ENSG00000100312	ACR	1	8	0.0916798
ENSG00000153237	CCDC148	1	9	0.0919501
ENSG00000136631	VPS45	1	6	0.0921438
ENSG00000139718	SETD1B	2	30	0.092159
ENSG00000142102	PGGHG	1	11	0.092431
ENSG00000069018	TRPC7	1	10	0.0924972
ENSG00000159263	SIM2	1	8	0.0927866
ENSG00000158882	TOMM40L	1	9	0.0927901
ENSG00000135740	SLC9A5	1	11	0.0930243
ENSG00000050555	LAMC3	2	29	0.0931967
ENSG00000154227	CERS3	1	12	0.0935518
ENSG00000112796	ENPP5	1	9	0.0937376
ENSG00000132932	ATP8A2	1	11	0.0937842
ENSG00000151148	UBE3B	1	12	0.0938067
ENSG00000114316	USP4	1	10	0.0939133
ENSG00000167535	CACNB3	1	7	0.0940246
ENSG00000074695	LMAN1	1	11	0.0940351
ENSG00000178719	GRINA	1	10	0.094101
ENSG00000118997	DNAH7	3	50	0.0941181
ENSG00000169218	RSPO1	1	11	0.0943254
ENSG00000063438	AHRR	1	9	0.0943544
ENSG00000172765	TMCC1	1	12	0.0944397
ENSG00000151687	ANKAR	1	11	0.0944626
ENSG00000114026	OGG1	1	10	0.0945513
ENSG00000187783	TMEM72	1	8	0.0946356
ENSG00000124789	NUP153	1	12	0.0947128
ENSG00000100650	SRSF5	1	11	0.0947289
ENSG00000131080	EDA2R	1	5	0.0947972
ENSG00000166106	ADAMTS15	1	13	0.095105
ENSG00000131023	LATS1	1	11	0.0951926
ENSG00000187546	AGMO	1	11	0.0952192
ENSG00000125531	FNDC11	1	7	0.0952225
ENSG00000104953	TLE6	1	11	0.0954335
ENSG00000155307	SAMSN1	1	8	0.0955039
ENSG00000172771	EFCAB12	1	9	0.0955477
ENSG00000197070	ARRDC1	1	12	0.0955756
ENSG00000254521	SIGLEC12	1	9	0.0956559
ENSG00000229474	PATL2	1	11	0.0956719
ENSG00000089250	NOS1	2	25	0.0957558
ENSG00000149418	ST14	2	27	0.0957774
ENSG00000081026	MAGI3	2	25	0.095923
ENSG00000137709	POU2F3	1	9	0.0959347
ENSG00000144061	NPHP1	1	9	0.0961311
ENSG00000109861	CTSC	1	7	0.0962536
ENSG00000177352	CCDC71	1	5	0.0963233
ENSG00000153406	NMRAL1	1	8	0.0964745
ENSG00000003147	ICA1	1	8	0.0965178
ENSG00000215251	FASTKD5	1	11	0.0966761
ENSG00000169375	SIN3A	1	12	0.0967203
ENSG00000131067	GGT7	1	11	0.0967457
ENSG00000158486	DNAH3	3	49	0.0968572
ENSG00000100678	SLC8A3	1	9	0.0969454
ENSG00000170485	NPAS2	1	11	0.0970718
ENSG00000128881	TTBK2	1	11	0.097255
ENSG00000069667	RORA	1	10	0.0972763
ENSG00000105290	APLP1	1	14	0.0973008
ENSG00000116176	TPSG1	1	11	0.0974964
ENSG00000136169	SETDB2	1	7	0.0975142
ENSG00000083817	ZNF416	1	9	0.0975327
ENSG00000140983	RHOT2	2	28	0.0976269
ENSG00000103245	CIAO3	1	10	0.0979281
ENSG00000165288	BRWD3	1	11	0.0979527
ENSG00000130783	CCDC62	1	8	0.0979696
ENSG00000109061	MYH1	2	30	0.0981875
ENSG00000162687	KCNT2	1	10	0.0982099
ENSG00000132016	BRME1	1	12	0.0982473
ENSG00000171804	WDR87	2	31	0.0982788
ENSG00000131653	TRAF7	1	11	0.0983845
ENSG00000182944	EWSR1	1	10	0.0984083
ENSG00000149201	CCDC81	1	10	0.0984315
ENSG00000110107	PRPF19	1	11	0.0984337
ENSG00000139174	PRICKLE1	1	10	0.0984586
ENSG00000105963	ADAP1	1	13	0.0985722
ENSG00000114861	FOXP1	1	11	0.0985932
ENSG00000166342	NETO1	1	9	0.0986645
ENSG00000115548	KDM3A	1	9	0.0986851
ENSG00000115760	BIRC6	3	55	0.0987443
ENSG00000131864	USP29	1	12	0.0988395
ENSG00000105664	COMP	1	12	0.0988865
ENSG00000104812	GYS1	1	9	0.0989035
ENSG00000135392	DNAJC14	1	8	0.0989301
ENSG00000148702	HABP2	1	12	0.0989969
ENSG00000149571	KIRREL3	2	27	0.0991279
ENSG00000006453	BAIAP2L1	1	6	0.0991985
ENSG00000000938	FGR	1	11	0.0993139
ENSG00000167182	SP2	1	11	0.0993635
ENSG00000112984	KIF20A	1	11	0.0993757
ENSG00000169660	HEXD	1	7	0.0996175
ENSG00000184999	SLC22A10	1	8	0.0997005
ENSG00000081277	PKP1	1	11	0.0997091
ENSG00000183347	GBP6	1	12	0.0999994
ENSG00000132522	GPS2	1	10	0.0999997
ENSG00000159216	RUNX1	0	1	0.100129
ENSG00000141556	TBCD	2	28	0.100212
ENSG00000164327	RICTOR	1	9	0.10026
ENSG00000143924	EML4	2	25	0.100298
ENSG00000162552	WNT4	1	7	0.100443
ENSG00000115307	AUP1	1	7	0.100503
ENSG00000140090	SLC24A4	1	13	0.10056
ENSG00000184613	NELL2	1	10	0.100695
ENSG00000072110	ACTN1	1	11	0.100806
ENSG00000129946	SHC2	1	11	0.100889
ENSG00000047578	KATNIP	2	25	0.101051
ENSG00000063169	BICRA	1	10	0.101355
ENSG00000010165	EEF1AKNMT	1	12	0.101394
ENSG00000163673	DCLK3	1	12	0.101461
ENSG00000081059	TCF7	1	12	0.101579
ENSG00000039068	CDH1	1	11	0.101755
ENSG00000104450	SPAG1	1	10	0.101891
ENSG00000170759	KIF5B	1	9	0.102276
ENSG00000163374	YY1AP1	1	7	0.102287
ENSG00000110148	CCKBR	1	10	0.102433
ENSG00000186792	HYAL3	1	9	0.102461
ENSG00000124207	CSE1L	1	11	0.102549
ENSG00000165689	ENTR1	1	11	0.102577
ENSG00000036828	CASR	1	9	0.102693
ENSG00000157106	SMG1	2	26	0.102943
ENSG00000101333	PLCB4	1	11	0.103183
ENSG00000100109	TFIP11	1	10	0.103353
ENSG00000011523	CEP68	1	5	0.103537
ENSG00000215305	VPS16	1	14	0.103585
ENSG00000116641	DOCK7	2	24	0.103611
ENSG00000154957	ZNF18	1	6	0.103884
ENSG00000187486	KCNJ11	1	8	0.103887
ENSG00000165643	SOHLH1	1	12	0.103889
ENSG00000055483	USP36	2	32	0.103908
ENSG00000056097	ZFR	1	11	0.103919
ENSG00000188559	RALGAPA2	2	26	0.104046
ENSG00000141756	FKBP10	1	12	0.104129
ENSG00000182272	B4GALNT4	1	11	0.104189
ENSG00000135749	PCNX2	2	34	0.104237
ENSG00000171560	FGA	1	11	0.104399
ENSG00000157014	TATDN2	1	10	0.104464
ENSG00000133812	SBF2	2	27	0.104645
ENSG00000198765	SYCP1	1	13	0.104712
ENSG00000159921	GNE	1	13	0.104876
ENSG00000162929	KIAA1841	1	7	0.104897
ENSG00000148143	ZNF462	2	30	0.105082
ENSG00000120696	KBTBD7	1	11	0.105119
ENSG00000111816	FRK	1	14	0.105191
ENSG00000146383	TAAR6	1	9	0.105305
ENSG00000130702	LAMA5	4	86	0.105343
ENSG00000185344	ATP6V0A2	1	12	0.105345
ENSG00000160683	CXCR5	1	11	0.105457
ENSG00000066032	CTNNA2	1	11	0.105551
ENSG00000156256	USP16	1	7	0.105621
ENSG00000171962	DRC3	1	11	0.10566
ENSG00000185070	FLRT2	1	11	0.105904
ENSG00000162738	VANGL2	1	10	0.106188
ENSG00000148339	SLC25A25	1	13	0.106333
ENSG00000145020	AMT	1	8	0.106658
ENSG00000102554	KLF5	1	12	0.106753
ENSG00000162231	NXF1	1	10	0.106756
ENSG00000108602	ALDH3A1	1	14	0.106806
ENSG00000109101	FOXN1	1	13	0.106828
ENSG00000120549	KIAA1217	2	33	0.107036
ENSG00000176884	GRIN1	1	12	0.107118
ENSG00000169919	GUSB	1	12	0.107128
ENSG00000166225	FRS2	1	6	0.107222
ENSG00000172578	KLHL6	1	13	0.107349
ENSG00000010818	HIVEP2	3	52	0.107428
ENSG00000141258	SGSM2	2	21	0.107572
ENSG00000137166	FOXP4	1	8	0.107708
ENSG00000127946	HIP1	1	11	0.107722
ENSG00000159495	TGM7	1	13	0.107767
ENSG00000166153	DEPDC4	1	9	0.107769
ENSG00000174306	ZHX3	1	12	0.107771
ENSG00000116478	HDAC1	1	12	0.107779
ENSG00000112414	ADGRG6	1	14	0.107956
ENSG00000111218	PRMT8	1	6	0.108042
ENSG00000123358	NR4A1	1	14	0.108138
ENSG00000182985	CADM1	1	9	0.108278
ENSG00000158805	ZNF276	1	12	0.108296
ENSG00000134398	ERN2	1	10	0.108773
ENSG00000159217	IGF2BP1	1	9	0.108965
ENSG00000176406	RIMS2	1	10	0.108986
ENSG00000141873	SLC39A3	1	9	0.109095
ENSG00000181804	SLC9A9	1	12	0.109264
ENSG00000176383	B3GNT4	1	12	0.109743
ENSG00000141664	ZCCHC2	1	13	0.109797
ENSG00000110446	SLC15A3	1	4	0.109885
ENSG00000185313	SCN10A	2	31	0.10992
ENSG00000129116	PALLD	1	11	0.109964
ENSG00000083093	PALB2	1	10	0.11012
ENSG00000156453	PCDH1	2	21	0.110146
ENSG00000090530	P3H2	1	13	0.110156
ENSG00000137571	SLCO5A1	1	7	0.110164
ENSG00000256870	SLC5A8	1	11	0.110177
ENSG00000146083	RNF44	1	12	0.110447
ENSG00000126218	F10	1	11	0.110459
ENSG00000033800	PIAS1	1	8	0.110715
ENSG00000130695	CEP85	1	14	0.110789
ENSG00000131196	NFATC1	1	13	0.110862
ENSG00000205669	ACOT6	1	6	0.110933
ENSG00000113396	SLC27A6	1	11	0.111088
ENSG00000226650	KIF4B	1	13	0.111131
ENSG00000105428	ZNRF4	1	11	0.111187
ENSG00000161381	PLXDC1	1	6	0.111246
ENSG00000136286	MYO1G	1	12	0.111265
ENSG00000185823	NPAP1	1	8	0.111276
ENSG00000103549	RNF40	1	12	0.111374
ENSG00000005339	CREBBP	2	37	0.111523
ENSG00000152520	PAN3	1	9	0.111604
ENSG00000006756	ARSD	1	13	0.111681
ENSG00000114948	ADAM23	1	8	0.111721
ENSG00000156931	VPS8	1	13	0.11174
ENSG00000000460	C1orf112	1	12	0.111905
ENSG00000132464	ENAM	1	12	0.111992
ENSG00000099399	MAGEB2	1	9	0.112068
ENSG00000108771	DHX58	1	10	0.112164
ENSG00000179588	ZFPM1	1	14	0.112242
ENSG00000060339	CCAR1	1	10	0.11228
ENSG00000147813	NAPRT	1	11	0.112587
ENSG00000127124	HIVEP3	3	49	0.112674
ENSG00000164742	ADCY1	2	33	0.11269
ENSG00000259030	FPGT-TNNI3K	1	15	0.112787
ENSG00000115694	STK25	1	11	0.112846
ENSG00000204843	DCTN1	1	13	0.11294
ENSG00000184156	KCNQ3	1	7	0.113133
ENSG00000158715	SLC45A3	1	8	0.113139
ENSG00000066027	PPP2R5A	1	12	0.113144
ENSG00000179010	MRFAP1	1	11	0.113192
ENSG00000172375	C2CD2L	1	15	0.11322
ENSG00000117335	CD46	0	1	0.113409
ENSG00000166912	MTMR10	1	13	0.113422
ENSG00000006744	ELAC2	1	12	0.11345
ENSG00000168137	SETD5	1	14	0.11369
ENSG00000112584	FAM120B	1	14	0.1138
ENSG00000104814	MAP4K1	1	11	0.114349
ENSG00000138074	SLC5A6	1	10	0.114368
ENSG00000105143	SLC1A6	1	13	0.114384
ENSG00000204178	MACO1	1	11	0.114615
ENSG00000162692	VCAM1	1	14	0.114649
ENSG00000164654	MIOS	1	15	0.114734
ENSG00000184451	CCR10	0	1	0.114826
ENSG00000032219	ARID4A	1	12	0.114838
ENSG00000180347	ITPRID1	1	11	0.114838
ENSG00000158296	SLC13A3	1	13	0.115025
ENSG00000213424	KRT222	0	1	0.115095
ENSG00000101916	TLR8	1	11	0.115101
ENSG00000142149	HUNK	1	12	0.115371
ENSG00000142082	SIRT3	1	9	0.115668
ENSG00000130479	MAP1S	1	13	0.116188
ENSG00000049283	EPN3	1	11	0.116195
ENSG00000160613	PCSK7	1	11	0.116296
ENSG00000105976	MET	1	12	0.116329
ENSG00000183476	SH2D7	1	8	0.116397
ENSG00000133027	PEMT	0	1	0.116408
ENSG00000105197	TIMM50	1	9	0.116459
ENSG00000215421	ZNF407	2	35	0.116522
ENSG00000204472	AIF1	0	1	0.116549
ENSG00000119681	LTBP2	2	32	0.116618
ENSG00000079819	EPB41L2	1	11	0.116765
ENSG00000241360	PDXP	1	8	0.116841
ENSG00000155052	CNTNAP5	2	30	0.117279
ENSG00000106266	SNX8	1	14	0.117375
ENSG00000158863	FAM160B2	1	9	0.117436
ENSG00000163882	POLR2H	0	1	0.117564
ENSG00000174885	NLRP6	1	14	0.117638
ENSG00000239306	RBM14	1	14	0.118044
ENSG00000137860	SLC28A2	1	13	0.118069
ENSG00000136542	GALNT5	1	14	0.118152
ENSG00000161847	RAVER1	1	12	0.118541
ENSG00000233436	BTBD18	1	10	0.11858
ENSG00000159399	HK2	1	11	0.118715
ENSG00000170185	USP38	1	11	0.118809
ENSG00000176920	FUT2	1	11	0.118867
ENSG00000088179	PTPN4	1	6	0.119018
ENSG00000011405	PIK3C2A	1	9	0.119326
ENSG00000009950	MLXIPL	1	12	0.119412
ENSG00000205838	TTC23L	1	10	0.119522
ENSG00000100767	PAPLN	1	15	0.119797
ENSG00000105649	RAB3A	0	1	0.11995
ENSG00000128045	RASL11B	0	1	0.11995
ENSG00000137265	IRF4	1	11	0.119991
ENSG00000133067	LGR6	1	13	0.120021
ENSG00000187498	COL4A1	2	29	0.120095
ENSG00000143294	PRCC	1	8	0.120145
ENSG00000135966	TGFBRAP1	1	15	0.12031
ENSG00000196455	PIK3R4	1	15	0.120677
ENSG00000037474	NSUN2	1	14	0.120996
ENSG00000105135	ILVBL	1	12	0.121014
ENSG00000112312	GMNN	0	1	0.121045
ENSG00000106868	SUSD1	1	12	0.121089
ENSG00000243147	MRPL33	0	1	0.121143
ENSG00000214021	TTLL3	1	11	0.121191
ENSG00000157827	FMNL2	1	12	0.121493
ENSG00000196482	ESRRG	1	15	0.121667
ENSG00000080644	CHRNA3	1	13	0.121743
ENSG00000155256	ZFYVE27	1	11	0.121818
ENSG00000109046	WSB1	0	1	0.121849
ENSG00000096006	CRISP3	1	11	0.121855
ENSG00000159692	CTBP1	1	12	0.122078
ENSG00000180697	C3orf22	0	1	0.122237
ENSG00000258890	CEP95	0	1	0.122237
ENSG00000087077	TRIP6	1	13	0.122327
ENSG00000182898	TCHHL1	1	8	0.122343
ENSG00000145431	PDGFC	0	1	0.122348
ENSG00000165841	CYP2C19	1	13	0.122884
ENSG00000198626	RYR2	4	77	0.122906
ENSG00000214711	CAPN14	1	13	0.123196
ENSG00000151715	TMEM45B	1	12	0.123246
ENSG00000143554	SLC27A3	1	7	0.12326
ENSG00000185615	PDIA2	1	14	0.123522
ENSG00000183773	AIFM3	1	11	0.123527
ENSG00000162607	USP1	1	9	0.123699
ENSG00000076864	RAP1GAP	1	13	0.123885
ENSG00000078246	TULP3	1	11	0.123957
ENSG00000162896	PIGR	1	11	0.124103
ENSG00000196083	IL1RAP	1	15	0.124234
ENSG00000100815	TRIP11	1	11	0.124361
ENSG00000131061	ZNF341	1	11	0.124376
ENSG00000198952	SMG5	1	13	0.124478
ENSG00000129347	KRI1	1	11	0.124524
ENSG00000105851	PIK3CG	1	12	0.124592
ENSG00000163635	ATXN7	1	8	0.124674
ENSG00000068724	TTC7A	1	14	0.124749
ENSG00000139914	FITM1	1	12	0.124889
ENSG00000032742	IFT88	1	13	0.124894
ENSG00000130396	AFDN	1	12	0.124927
ENSG00000106012	IQCE	2	32	0.125295
ENSG00000138135	CH25H	0	1	0.125317
ENSG00000186185	KIF18B	1	14	0.125444
ENSG00000091664	SLC17A6	1	14	0.125539
ENSG00000104142	VPS18	1	15	0.125854
ENSG00000182674	KCNB2	1	12	0.125932
ENSG00000007001	UPP2	0	1	0.12624
ENSG00000154678	PDE1C	1	14	0.126399
ENSG00000177575	CD163	1	15	0.12642
ENSG00000127334	DYRK2	1	13	0.126705
ENSG00000167311	ART5	0	1	0.126913
ENSG00000173889	PHC3	1	7	0.127227
ENSG00000184661	CDCA2	1	11	0.127232
ENSG00000170382	LRRN2	1	12	0.127249
ENSG00000167930	FAM234A	1	12	0.127349
ENSG00000179295	PTPN11	1	12	0.12744
ENSG00000001461	NIPAL3	1	9	0.127657
ENSG00000110723	EXPH5	1	14	0.127814
ENSG00000128346	C22orf23	0	1	0.128113
ENSG00000171311	EXOSC1	0	1	0.128116
ENSG00000135837	CEP350	2	31	0.128161
ENSG00000198939	ZFP2	0	1	0.12863
ENSG00000059145	UNKL	1	13	0.128665
ENSG00000090612	ZNF268	0	1	0.128676
ENSG00000115461	IGFBP5	0	1	0.128676
ENSG00000164305	CASP3	0	1	0.128676
ENSG00000166016	ABTB2	1	12	0.128728
ENSG00000118518	RNF146	0	1	0.128804
ENSG00000123728	RAP2C	0	1	0.128804
ENSG00000178922	HYI	0	1	0.128804
ENSG00000196199	MPHOSPH8	1	10	0.128876
ENSG00000090534	THPO	0	1	0.128965
ENSG00000103995	CEP152	1	14	0.129036
ENSG00000134216	CHIA	1	9	0.129069
ENSG00000135829	DHX9	1	12	0.129177
ENSG00000175920	DOK7	1	11	0.12937
ENSG00000080007	DDX43	1	12	0.129401
ENSG00000168004	PLAAT5	0	1	0.129515
ENSG00000010379	SLC6A13	1	8	0.129538
ENSG00000174177	CTU2	1	13	0.129795
ENSG00000155659	VSIG4	1	12	0.129838
ENSG00000188290	HES4	0	1	0.129885
ENSG00000122390	NAA60	1	8	0.129934
ENSG00000232810	TNF	0	1	0.130004
ENSG00000196576	PLXNB2	3	53	0.130171
ENSG00000185862	EVI2B	0	1	0.130388
ENSG00000133639	BTG1	0	1	0.130515
ENSG00000197372	ZNF675	0	1	0.130515
ENSG00000171443	ZNF524	0	1	0.130533
ENSG00000163806	SPDYA	0	1	0.130597
ENSG00000196091	MYBPC1	1	13	0.130642
ENSG00000163964	PIGX	0	1	0.130729
ENSG00000181894	ZNF329	1	10	0.130797
ENSG00000159905	ZNF221	1	9	0.130806
ENSG00000172053	QARS1	1	12	0.130868
ENSG00000113758	DBN1	1	11	0.130987
ENSG00000167513	CDT1	1	15	0.131083
ENSG00000136159	NUDT15	0	1	0.131124
ENSG00000204764	RANBP17	1	12	0.131192
ENSG00000164099	PRSS12	1	11	0.131345
ENSG00000177181	RIMKLA	0	1	0.131363
ENSG00000100219	XBP1	0	1	0.131404
ENSG00000185298	CCDC137	1	12	0.131513
ENSG00000104976	SNAPC2	1	11	0.131562
ENSG00000132182	NUP210	2	36	0.131683
ENSG00000196781	TLE1	1	13	0.131748
ENSG00000154265	ABCA5	1	12	0.132012
ENSG00000033100	CHPF2	1	13	0.132048
ENSG00000134255	CEPT1	1	12	0.132082
ENSG00000125734	GPR108	1	11	0.132161
ENSG00000092295	TGM1	1	15	0.132278
ENSG00000144847	IGSF11	0	1	0.132332
ENSG00000148341	SH3GLB2	0	1	0.132332
ENSG00000136560	TANK	0	1	0.132378
ENSG00000047634	SCML1	0	1	0.132474
ENSG00000169085	VXN	0	1	0.132474
ENSG00000103423	DNAJA3	1	9	0.13261
ENSG00000134597	RBMX2	0	1	0.132851
ENSG00000133597	ADCK2	1	15	0.132911
ENSG00000137411	VARS2	1	12	0.133041
ENSG00000151702	FLI1	1	15	0.133163
ENSG00000148296	SURF6	0	1	0.133178
ENSG00000103994	ZNF106	1	12	0.133256
ENSG00000196498	NCOR2	3	64	0.133406
ENSG00000162063	CCNF	1	14	0.133567
ENSG00000185156	MFSD6L	1	8	0.133657
ENSG00000154914	USP43	1	12	0.133661
ENSG00000079999	KEAP1	1	15	0.133736
ENSG00000166278	C2	1	7	0.133783
ENSG00000174938	SEZ6L2	1	15	0.133793
ENSG00000242485	MRPL20	0	1	0.133798
ENSG00000043093	DCUN1D1	0	1	0.133837
ENSG00000100373	UPK3A	1	13	0.134009
ENSG00000183044	ABAT	1	11	0.134016
ENSG00000106554	CHCHD3	0	1	0.134055
ENSG00000179387	ELMOD2	0	1	0.134063
ENSG00000089486	CDIP1	0	1	0.134188
ENSG00000104499	GML	0	1	0.134188
ENSG00000164008	C1orf50	0	1	0.134188
ENSG00000168118	RAB4A	0	1	0.134188
ENSG00000165475	CRYL1	1	12	0.134209
ENSG00000084652	TXLNA	1	13	0.134214
ENSG00000066379	POLR1H	0	1	0.134245
ENSG00000148671	ADIRF	0	1	0.134245
ENSG00000151176	PLBD2	1	10	0.134306
ENSG00000159527	PGLYRP3	1	5	0.134445
ENSG00000075391	RASAL2	1	9	0.134539
ENSG00000196937	FAM3C	0	1	0.134659
ENSG00000115648	MLPH	1	9	0.13477
ENSG00000137941	TTLL7	1	14	0.134875
ENSG00000049247	UTS2	0	2	0.134904
ENSG00000131143	COX4I1	0	1	0.134904
ENSG00000183155	RABIF	0	1	0.13506
ENSG00000241878	PISD	1	14	0.135193
ENSG00000111452	ADGRD1	1	12	0.135204
ENSG00000100599	RIN3	1	12	0.135596
ENSG00000225968	ELFN1	1	12	0.135644
ENSG00000205639	MFSD2B	1	13	0.135657
ENSG00000071655	MBD3	1	7	0.135858
ENSG00000154328	NEIL2	1	14	0.135865
ENSG00000165821	SALL2	1	9	0.136178
ENSG00000130816	DNMT1	2	39	0.136236
ENSG00000123700	KCNJ2	1	10	0.136255
ENSG00000162636	FAM102B	0	1	0.136449
ENSG00000104518	GSDMD	1	15	0.136667
ENSG00000204128	C2orf72	0	1	0.136685
ENSG00000188487	INSC	1	14	0.136722
ENSG00000163975	MELTF	1	13	0.13675
ENSG00000145217	SLC26A1	1	13	0.13684
ENSG00000130021	PUDP	0	1	0.136886
ENSG00000182489	XKRX	0	1	0.136886
ENSG00000123689	G0S2	0	1	0.137168
ENSG00000168778	TCTN2	1	16	0.137272
ENSG00000118418	HMGN3	0	1	0.137348
ENSG00000147378	FATE1	0	1	0.137348
ENSG00000124092	CTCFL	1	14	0.137554
ENSG00000165716	DIPK1B	1	15	0.137797
ENSG00000169129	AFAP1L2	1	16	0.138114
ENSG00000108684	ASIC2	1	15	0.138119
ENSG00000100362	PVALB	0	1	0.138144
ENSG00000148719	DNAJB12	0	1	0.138144
ENSG00000162961	DPY30	0	1	0.138144
ENSG00000066629	EML1	1	12	0.138216
ENSG00000090266	NDUFB2	0	1	0.138266
ENSG00000107262	BAG1	0	1	0.138266
ENSG00000128536	CDHR3	1	13	0.138536
ENSG00000140525	FANCI	1	12	0.138548
ENSG00000132669	RIN2	1	12	0.138648
ENSG00000104447	TRPS1	1	14	0.138743
ENSG00000158555	GDPD5	1	13	0.138873
ENSG00000198729	PPP1R14C	0	1	0.138897
ENSG00000197467	COL13A1	1	15	0.138999
ENSG00000120500	ARR3	0	1	0.139034
ENSG00000154102	C16orf74	0	1	0.139034
ENSG00000116213	WRAP73	1	10	0.139067
ENSG00000078018	MAP2	1	15	0.139396
ENSG00000137574	TGS1	1	15	0.139414
ENSG00000100911	PSME2	0	1	0.139458
ENSG00000167522	ANKRD11	3	61	0.139547
ENSG00000132530	XAF1	0	1	0.139735
ENSG00000198162	MAN1A2	1	11	0.139894
ENSG00000168229	PTGDR	0	1	0.139908
ENSG00000125037	EMC3	0	1	0.139948
ENSG00000112208	BAG2	0	1	0.140075
ENSG00000138085	ATRAID	0	1	0.1401
ENSG00000008118	CAMK1G	1	14	0.140175
ENSG00000186919	ZACN	1	9	0.140176
ENSG00000001036	FUCA2	1	9	0.140195
ENSG00000167895	TMC8	1	11	0.140196
ENSG00000117505	DR1	0	1	0.140275
ENSG00000131652	THOC6	1	12	0.140414
ENSG00000126458	RRAS	0	1	0.140422
ENSG00000113073	SLC4A9	1	15	0.140469
ENSG00000204482	LST1	0	1	0.14052
ENSG00000196670	ZFP62	1	11	0.140537
ENSG00000172403	SYNPO2	1	12	0.140824
ENSG00000065150	IPO5	1	12	0.140846
ENSG00000253710	ALG11	1	8	0.140921
ENSG00000048544	MRPS10	0	1	0.141033
ENSG00000100979	PLTP	1	15	0.141051
ENSG00000188710	QRFP	0	1	0.141079
ENSG00000213066	CEP43	0	1	0.141079
ENSG00000160396	HIPK4	1	14	0.141138
ENSG00000172209	GPR22	0	1	0.14135
ENSG00000164107	HAND2	0	1	0.141379
ENSG00000130700	GATA5	0	1	0.141449
ENSG00000115318	LOXL3	1	12	0.141631
ENSG00000086848	ALG9	1	15	0.141649
ENSG00000031691	CENPQ	0	1	0.141693
ENSG00000037637	FBXO42	1	12	0.141862
ENSG00000108557	RAI1	2	35	0.14212
ENSG00000187049	TMEM216	0	1	0.142304
ENSG00000213988	ZNF90	0	1	0.142304
ENSG00000164096	C4orf3	0	1	0.142734
ENSG00000151665	PIGF	0	1	0.142845
ENSG00000184305	CCSER1	1	11	0.142931
ENSG00000125788	DEFB126	0	1	0.143295
ENSG00000006194	ZNF263	1	8	0.143336
ENSG00000105612	DNASE2	0	1	0.143337
ENSG00000174165	ZDHHC24	0	1	0.143337
ENSG00000060237	WNK1	1	16	0.143351
ENSG00000158941	CCAR2	1	14	0.143422
ENSG00000116141	MARK1	1	6	0.143553
ENSG00000163788	SNRK	1	9	0.143573
ENSG00000215568	GAB4	1	11	0.143595
ENSG00000129480	DTD2	0	1	0.143609
ENSG00000186416	NKRF	1	10	0.143785
ENSG00000155304	HSPA13	0	1	0.143793
ENSG00000137975	CLCA2	1	13	0.143967
ENSG00000165338	HECTD2	0	1	0.144006
ENSG00000149503	INCENP	1	13	0.144207
ENSG00000104044	OCA2	1	13	0.14422
ENSG00000119820	YIPF4	0	1	0.144238
ENSG00000160654	CD3G	0	1	0.144252
ENSG00000171487	NLRP5	1	16	0.144512
ENSG00000010072	SPRTN	1	13	0.14459
ENSG00000119943	PYROXD2	1	12	0.144616
ENSG00000188976	NOC2L	1	14	0.144666
ENSG00000133020	MYH8	1	16	0.144744
ENSG00000152670	DDX4	1	13	0.144765
ENSG00000181789	COPG1	1	15	0.144773
ENSG00000016490	CLCA1	1	11	0.144864
ENSG00000140600	SH3GL3	0	1	0.1449
ENSG00000167173	C15orf39	1	14	0.144911
ENSG00000164949	GEM	0	1	0.145057
ENSG00000101349	PAK5	1	14	0.145138
ENSG00000184220	CMSS1	0	1	0.145165
ENSG00000134779	TPGS2	0	1	0.145212
ENSG00000132446	FTHL17	0	1	0.145286
ENSG00000140854	KATNB1	1	16	0.145286
ENSG00000101150	TPD52L2	0	1	0.145295
ENSG00000134058	CDK7	0	1	0.145448
ENSG00000163331	DAPL1	0	1	0.145448
ENSG00000170312	CDK1	0	1	0.145448
ENSG00000163913	IFT122	1	11	0.145468
ENSG00000134539	KLRD1	0	1	0.14548
ENSG00000177946	CENPBD1	0	1	0.145763
ENSG00000108759	KRT32	0	1	0.14591
ENSG00000081148	IMPG2	1	15	0.146162
ENSG00000138079	SLC3A1	1	16	0.146175
ENSG00000146676	PURB	0	1	0.146305
ENSG00000148942	SLC5A12	0	1	0.146305
ENSG00000172244	C5orf34	1	13	0.146312
ENSG00000112195	TREML2	0	1	0.146316
ENSG00000153060	TEKT5	1	13	0.146497
ENSG00000162004	CCDC78	1	14	0.146542
ENSG00000009709	PAX7	1	14	0.146576
ENSG00000111537	IFNG	0	1	0.146584
ENSG00000178971	CTC1	1	16	0.146651
ENSG00000128203	ASPHD2	1	13	0.146743
ENSG00000134853	PDGFRA	1	13	0.146758
ENSG00000234776	C11orf94	0	1	0.146773
ENSG00000261857	MIA	0	1	0.146773
ENSG00000167674	HDGFL2	1	13	0.1468
ENSG00000197746	PSAP	1	13	0.146906
ENSG00000130699	TAF4	1	14	0.147029
ENSG00000132554	RGS22	1	10	0.147054
ENSG00000164694	FNDC1	2	35	0.147074
ENSG00000152558	TMEM123	0	1	0.147661
ENSG00000104723	TUSC3	0	1	0.147663
ENSG00000177238	TRIM72	0	1	0.147684
ENSG00000188042	ARL4C	0	1	0.147688
ENSG00000184635	ZNF93	0	1	0.147817
ENSG00000101442	ACTR5	1	14	0.147887
ENSG00000132205	EMILIN2	1	13	0.147927
ENSG00000187068	C3orf70	0	1	0.14798
ENSG00000087495	PHACTR3	1	15	0.148005
ENSG00000172301	COPRS	0	1	0.148072
ENSG00000178460	MCMDC2	0	1	0.148234
ENSG00000090905	TNRC6A	1	14	0.148445
ENSG00000104903	LYL1	0	1	0.148497
ENSG00000140391	TSPAN3	0	1	0.148518
ENSG00000114942	EEF1B2	0	1	0.14859
ENSG00000140948	ZCCHC14	1	13	0.148607
ENSG00000091490	SEL1L3	1	17	0.148616
ENSG00000084734	GCKR	1	14	0.148874
ENSG00000134504	KCTD1	0	1	0.148885
ENSG00000253598	SLC10A5	0	1	0.148888
ENSG00000117862	TXNDC12	0	1	0.148904
ENSG00000150779	TIMM8B	0	1	0.148919
ENSG00000174500	GCSAM	0	1	0.148919
ENSG00000120235	IFNA6	0	1	0.148937
ENSG00000184897	H1-10	0	1	0.148937
ENSG00000011052	NME1-NME2	0	1	0.148987
ENSG00000166855	CLPX	1	12	0.149354
ENSG00000166164	BRD7	0	1	0.149425
ENSG00000204300	TMEM225	0	1	0.149536
ENSG00000117640	MTFR1L	0	1	0.149826
ENSG00000108443	RPS6KB1	0	1	0.149891
ENSG00000152137	HSPB8	0	1	0.149891
[truncated: 13,967 more rows]
