# Supplementary material
Source: HighWire-hosted journal article supplement (https://ard.bmj.com/content/83/2/253)
Supplement: inline-supplementary-material-5 [file inline-supplementary-material-5.xlsx]

## Sheet: Table
CHROM	GENPOS	ID	REF	ALT	ALT FREQ	N	TEST	BETA	SE	CHISQ	P	Func.refGene	Gene.refGene	GeneDetail.refGene	ExonicFunc.refGene	AAChange.refGene	GnomAD PopFreqMax	CADD score
19	4511539	19:4511539:CTTGGCCACATTCGCAGCACCGGTCACCCCACTGCACACAGCATCCTTGGTACCAGTTAACACAGTCTTGGTGGTGTCCATGCCGGTCTGGACAGTCCCTTTGGCCAACTTCACAGCCCCTGTGAGCCCAGTGGACACAGCATCTTTAGTGCCAGTCAGGACAGACTTTGTAGTGTCCAGGCCCCCTTGGATGGCCCCT:C	CTTGGCCACATTCGCAGCACCGGTCACCCCACTGCACACAGCATCCTTGGTACCAGTTAACACAGTCTTGGTGGTGTCCATGCCGGTCTGGACAGTCCCTTTGGCCAACTTCACAGCCCCTGTGAGCCCAGTGGACACAGCATCTTTAGTGCCAGTCAGGACAGACTTTGTAGTGTCCAGGCCCCCTTGGATGGCCCCT	C	0.00337718	2813	ADD	3.21874	0.550771	22.1073	2.57834e-06	exonic	PLIN4	.	nonframeshift_deletion	PLIN4:NM_001367868:exon5:c.2235_2432del:p.I748_A813del	0.0798	15.5
19	36271687	19:36271687:G:A	G	A	0.0107708	2971	ADD	2.14769	0.38351	21.2062	4.1243e-06	exonic	ARHGAP33	.	synonymous_SNV	ARHGAP33:NM_001172630:exon9:c.G390A:p.P130P,ARHGAP33:NM_001366178:exon10:c.G798A:p.P266P,ARHGAP33:NM_052948:exon10:c.G798A:p.P266P	0.0126	9.83
1	36557393	1:36557393:C:A	C	A	0.00033456	2989	ADD	6.39522	1.91579	21.0771	4.41174e-06	exonic	ADPRHL2	.	synonymous_SNV	ADPRHL2:NM_017825:exon3:c.C483A:p.S161S	0.0008	11.03
11	55111354	11:55111354:C:T	C	T	0.000503356	2980	ADD	5.58116	1.87449	20.6441	5.53083e-06	exonic	OR4A16	.	synonymous_SNV	OR4A16:NM_001005274:exon1:c.C678T:p.Y226Y	0.0667	0.038
11	55111328	11:55111328:G:A	G	A	0.000505902	2965	ADD	5.57799	1.87238	20.6299	5.57173e-06	exonic	OR4A16	.	nonsynonymous_SNV	OR4A16:NM_001005274:exon1:c.G652A:p.V218I	0.067	0.051
22	32109763	22:32109763:T:C	T	C	0.000334672	2988	ADD	6.37892	1.95931	20.4413	6.14879e-06	exonic	PRR14L	.	synonymous_SNV	PRR14L:NM_173566:exon4:c.A4062G:p.Q1354Q	0.0066	1.925
19	4298223	19:4298223:G:A	G	A	0.000504371	2974	ADD	5.63858	1.25613	19.4173	1.05053e-05	exonic	TMIGD2	.	nonsynonymous_SNV	TMIGD2:NM_001169126:exon2:c.C166T:p.R56C,TMIGD2:NM_144615:exon2:c.C166T:p.R56C	0.0001	15.45
11	56019925	11:56019925:T:G	T	G	0.00117371	2982	ADD	4.26784	0.834545	19.3212	1.10471e-05	exonic	OR5T3	.	nonsynonymous_SNV	OR5T3:NM_001004747:exon1:c.T250G:p.W84G	0.1699	10.35
1	177249739	1:177249739:G:A	G	A	0.00033456	2989	ADD	5.98639	1.90244	19.2282	1.15985e-05	exonic	BRINP2	.	nonsynonymous_SNV	BRINP2:NM_021165:exon8:c.G1427A:p.R476H	0.0014	24.5
5	149676856	5:149676856:C:T	C	T	0.000334672	2988	ADD	6.08678	1.95234	19.0911	1.24626e-05	exonic	ARSI	.	nonsynonymous_SNV	ARSI:NM_001012301:exon2:c.G1631A:p.R544H	0.0003	22.7
12	113704131	12:113704131:C:T	C	T	0.000524659	2859	ADD	5.50561	1.2414	18.9249	1.35963e-05	exonic	TPCN1	.	synonymous_SNV	TPCN1:NM_001301214:exon3:c.C180T:p.P60P,TPCN1:NM_001351347:exon3:c.C180T:p.P60P,TPCN1:NM_017901:exon4:c.C384T:p.P128P,TPCN1:NM_001143819:exon5:c.C600T:p.P200P,TPCN1:NM_001351346:exon5:c.C180T:p.P60P	0.0008	0.8
3	141497712	3:141497712:G:A	G	A	0.000669344	2988	ADD	5.03337	1.04196	17.8378	2.40553e-05	exonic	GRK7	.	nonsynonymous_SNV	GRK7:NM_139209:exon1:c.G586A:p.V196M	0.0012	24.8
3	141497713	3:141497713:T:G	T	G	0.000669344	2988	ADD	5.03337	1.04196	17.8378	2.40553e-05	exonic	GRK7	.	nonsynonymous_SNV	GRK7:NM_139209:exon1:c.T587G:p.V196G	0.0012	24.1
10	126177052	10:126177052:C:T	C	T	0.000334672	2988	ADD	5.90482	1.98387	17.7812	2.47822e-05	exonic	LHPP	.	synonymous_SNV	LHPP:NM_001167880:exon3:c.C375T:p.D125D,LHPP:NM_001318331:exon3:c.C375T:p.D125D,LHPP:NM_001318332:exon3:c.C375T:p.D125D,LHPP:NM_022126:exon3:c.C375T:p.D125D	0.0278	0.719
17	33802202	17:33802202:T:G	T	G	0.000334672	2988	ADD	5.74496	1.95599	17.4023	3.02454e-05	exonic	SLFN12L	.	nonsynonymous_SNV	SLFN12L:NM_001195790:exon4:c.A1507C:p.I503L,SLFN12L:NM_001363830:exon5:c.A1594C:p.I532L	0.0002	0.714
2	179544980	2:179544980:C:T	C	T	0.000335233	2983	ADD	6.16982	2.10035	17.3663	3.08248e-05	splicing	TTN	NM_001256850:exon137:c.32467+1G>A\x3bNM_133378:exon136:c.29686+1G>A\x3bNM_001267550:exon139:c.33418+1G>A	.	.	2.698e-05	33
15	91181983	15:91181983:A:G	A	G	0.000502008	2988	ADD	5.09773	1.22413	17.2884	3.21137e-05	exonic	CRTC3	.	nonsynonymous_SNV	CRTC3:NM_001042574:exon13:c.A1484G:p.N495S,CRTC3:NM_022769:exon13:c.A1484G:p.N495S	0.0007	0.065
1	1026913	1:1026913:C:T	C	T	0.0328678	2936	ADD	1.36887	0.280792	17.048	3.6446e-05	exonic	C1orf159	.	nonsynonymous_SNV	C1orf159:NM_017891:exon3:c.G11A:p.R4Q,C1orf159:NM_001330306:exon4:c.G11A:p.R4Q,C1orf159:NM_001363525:exon4:c.G11A:p.R4Q	0.058	0.001
2	133540634	2:133540634:G:C	G	C	0.000334672	2988	ADD	5.60413	1.93525	16.9874	3.76288e-05	exonic	NCKAP5	.	synonymous_SNV	NCKAP5:NM_207363:exon14:c.C3750G:p.S1250S	0.0918	0.114
2	133541422	2:133541422:T:A	T	A	0.000334672	2988	ADD	5.60413	1.93525	16.9874	3.76288e-05	exonic	NCKAP5	.	nonsynonymous_SNV	NCKAP5:NM_207363:exon14:c.A2962T:p.T988S	0.0961	0.007
19	58131885	19:58131885:C:T	C	T	0.000670017	2985	ADD	4.80475	1.01687	16.9619	3.81373e-05	exonic	ZNF134	.	nonsynonymous_SNV	ZNF134:NM_003435:exon3:c.C398T:p.T133M	0.0005	1.451
8	22438918	8:22438918:C:T	C	T	0.000503356	2980	ADD	4.98385	1.83839	16.783	4.19064e-05	exonic	PDLIM2	.	synonymous_SNV	PDLIM2:NM_001368120:exon2:c.C120T:p.D40D,PDLIM2:NM_176871:exon2:c.C120T:p.D40D,PDLIM2:NM_198042:exon2:c.C120T:p.D40D,PDLIM2:NM_021630:exon3:c.C870T:p.D290D	0.0021	1.609
8	3267108	8:3267108:A:G	A	G	0.00253122	2963	ADD	3.09112	0.63066	16.6158	4.57667e-05	exonic	CSMD1	.	synonymous_SNV	CSMD1:NM_033225:exon13:c.T1581C:p.C527C	0.0019	10.25
5	311436	5:311436:C:T	C	T	0.000502008	2988	ADD	4.87699	1.20238	16.5071	4.84674e-05	exonic	PDCD6	.	synonymous_SNV	PDCD6:NM_001267557:exon3:c.C192T:p.D64D,PDCD6:NM_001267556:exon5:c.C390T:p.D130D,PDCD6:NM_013232:exon5:c.C396T:p.D132D,PDCD6:NM_001267558:exon6:c.C186T:p.D62D	0.0001	8.982
1	182027028	1:182027028:C:A	C	A	0.00050184	2989	ADD	4.91013	1.21872	16.4069	5.10999e-05	exonic	ZNF648	.	nonsynonymous_SNV	ZNF648:NM_001009992:exon2:c.G118T:p.G40C	0.0012	17.93
16	57789398	16:57789398:G:A	G	A	0.000503018	2982	ADD	4.95041	1.25198	16.1335	5.9031e-05	exonic	KATNB1	.	nonsynonymous_SNV	KATNB1:NM_005886:exon16:c.G1558A:p.D520N	0.0004	25.3
2	242075362	2:242075362:G:A	G	A	0.00402145	2984	ADD	2.49599	0.529152	16.0694	6.10619e-05	exonic	PASK	.	synonymous_SNV	PASK:NM_001252119:exon8:c.C1230T:p.D410D,PASK:NM_001252122:exon8:c.C1125T:p.D375D,PASK:NM_001252124:exon8:c.C1230T:p.D410D,PASK:NM_015148:exon8:c.C1230T:p.D410D,PASK:NM_001252120:exon9:c.C1230T:p.D410D	0.2377	0.037
6	33289246	6:33289246:C:T	C	T	0.00267917	2986	ADD	3.13502	0.665584	16.0249	6.25158e-05	exonic	DAXX	.	synonymous_SNV	DAXX:NM_001254717:exon2:c.G81A:p.S27S,DAXX:NM_001141969:exon3:c.G306A:p.S102S,DAXX:NM_001141970:exon3:c.G342A:p.S114S,DAXX:NM_001350:exon3:c.G306A:p.S102S	0.003	8.755
11	63884474	11:63884474:C:T	C	T	0.0109538	2967	ADD	1.94288	0.40421	16.0103	6.29999e-05	exonic	FLRT1	.	synonymous_SNV	FLRT1:NM_013280:exon2:c.C735T:p.S245S	0.4944	8.415
1	248185740	1:248185740:G:A	G	A	0.000502008	2988	ADD	4.77144	1.20187	15.999	6.33768e-05	exonic	OR2L5	.	nonsynonymous_SNV	OR2L5:NM_001258284:exon1:c.G491A:p.R164H	0.0079	0.176
18	252559	18:252559:G:A	G	A	0.999498	2989	ADD	-4.99534	1.26877	15.9906	6.36576e-05	exonic	THOC1	.	synonymous_SNV	THOC1:NM_005131:exon9:c.C657T:p.D219D	1	11.97
11	63884027	11:63884027:C:T	C	T	0.688657	2971	ADD	-0.673676	0.16055	15.5124	8.19653e-05	exonic	FLRT1	.	synonymous_SNV	FLRT1:NM_013280:exon2:c.C288T:p.A96A	0.7318	0.095
17	1651988	17:1651988:G:A	G	A	0.0011741	2981	ADD	3.76584	0.852467	15.4582	8.4349e-05	exonic	SERPINF2	.	nonsynonymous_SNV	SERPINF2:NM_001165921:exon7:c.G620A:p.R207H,SERPINF2:NM_000934:exon8:c.G812A:p.R271H,SERPINF2:NM_001165920:exon8:c.G812A:p.R271H	0.0031	0.194
13	21370317	13:21370317:T:A	T	A	0.0146169	2976	ADD	1.8238	0.384886	15.2776	9.28111e-05	exonic	XPO4	.	nonsynonymous_SNV	XPO4:NM_022459:exon18:c.A2695T:p.I899L	0.0353	14.61
11	63885704	11:63885704:C:T	C	T	0.687353	2973	ADD	-0.667057	0.160473	15.2423	9.45606e-05	exonic	FLRT1	.	synonymous_SNV	FLRT1:NM_013280:exon2:c.C1965T:p.Y655Y	0.7285	5.093
7	127253898	7:127253898:G:A	G	A	0.0666555	2978	ADD	1.0314	0.237567	14.7919	0.000120047	exonic	PAX4	.	synonymous_SNV	PAX4:NM_001366111:exon5:c.C474T:p.G158G,PAX4:NM_001366110:exon7:c.C474T:p.G158G	0.0808	3.141
14	32257017	14:32257017:T:C	T	C	0.00269179	2972	ADD	2.92572	0.640702	14.7075	0.000125548	exonic	NUBPL	.	nonsynonymous_SNV	NUBPL:NM_001201573:exon5:c.T257C:p.V86A,NUBPL:NM_025152:exon7:c.T545C:p.V182A	0.0063	26
16	3073240	16:3073240:G:T	G	T	0.228333	2873	ADD	-0.9277	0.246625	14.5855	0.000133937	exonic	HCFC1R1	.	nonsynonymous_SNV	HCFC1R1:NM_001002017:exon2:c.C218A:p.P73Q,HCFC1R1:NM_001288667:exon2:c.C269A:p.P90Q,HCFC1R1:NM_001288666:exon3:c.C218A:p.P73Q,HCFC1R1:NM_001288668:exon3:c.C86A:p.P29Q,HCFC1R1:NM_001308070:exon3:c.C155A:p.P52Q,HCFC1R1:NM_017885:exon3:c.C275A:p.P92Q,HCFC1R1:NM_001002018:exon4:c.C275A:p.P92Q,HCFC1R1:NM_001288665:exon4:c.C275A:p.P92Q	0.2962	22.2
8	144642815	8:144642815:C:T	C	T	0.0303386	2983	ADD	1.35909	0.315036	14.4493	0.000143986	exonic	GSDMD	.	synonymous_SNV	GSDMD:NM_024736:exon4:c.C453T:p.R151R,GSDMD:NM_001166237:exon7:c.C453T:p.R151R	0.043	1.421
5	170883733	5:170883733:C:T	C	T	0.000672043	2976	ADD	4.27959	1.02638	14.3052	0.000155435	exonic	FGF18	.	nonsynonymous_SNV	FGF18:NM_003862:exon5:c.C548T:p.P183L	0.0011	22.2
1	235611729	1:235611729:C:A	C	A	0.0008364	2989	ADD	4.21456	0.938377	14.2756	0.000157896	exonic	TBCE	.	nonsynonymous_SNV	TBCE:NM_001287802:exon15:c.C1126A:p.L376I,TBCE:NM_001079515:exon16:c.C1465A:p.L489I,TBCE:NM_003193:exon16:c.C1465A:p.L489I,TBCE:NM_001287801:exon17:c.C1618A:p.L540I	0.0012	21.2
20	31023500	20:31023500:C:T	C	T	0.00301407	2986	ADD	2.70413	0.58809	14.27	0.000158369	exonic	ASXL1	.	synonymous_SNV	ASXL1:NM_001363734:exon11:c.C2802T:p.H934H,ASXL1:NM_015338:exon12:c.C2985T:p.H995H	0.1288	3.898
10	91477337	10:91477337:T:A	T	A	0.000338753	2952	ADD	5.79486	2.16194	14.2432	0.000160639	exonic	KIF20B	.	nonsynonymous_SNV	KIF20B:NM_001284259:exon11:c.T1129A:p.S377T,KIF20B:NM_016195:exon11:c.T1129A:p.S377T	0.031	21.8
4	70513199	4:70513199:G:A	G	A	0.00854844	2983	ADD	2.10102	0.457335	14.2362	0.000161239	exonic	UGT2A1	.	nonsynonymous_SNV	UGT2A1:NM_001301239:exon1:c.C164T:p.A55V,UGT2A1:NM_001252274:exon2:c.C164T:p.A55V,UGT2A1:NM_001252275:exon2:c.C164T:p.A55V,UGT2A1:NM_006798:exon2:c.C164T:p.A55V	0.0226	16.74
14	105707609	14:105707609:G:A	G	A	0.00914944	2951	ADD	1.88054	0.439386	14.2043	0.000163999	exonic	BRF1	.	synonymous_SNV	BRF1:NM_145685:exon2:c.C75T:p.C25C,BRF1:NM_001242788:exon5:c.C606T:p.C202C,BRF1:NM_001242786:exon6:c.C342T:p.C114C,BRF1:NM_001242787:exon6:c.C342T:p.C114C,BRF1:NM_001519:exon6:c.C687T:p.C229C	0.0153	5.109
6	31080030	6:31080030:C:G	C	G	0.000167392	2987	ADD	6.57788	2.31004	14.2037	0.000164048	exonic	C6orf15	.	nonsynonymous_SNV	C6orf15:NM_014070:exon2:c.G106C:p.V36L	0.0002	9.595
6	138752012	6:138752012:C:A	C	A	0.000167392	2987	ADD	6.57789	2.31004	14.2037	0.000164048	exonic	NHSL1	.	nonsynonymous_SNV	NHSL1:NM_020464:exon5:c.G3482T:p.G1161V,NHSL1:NM_001144060:exon6:c.G3470T:p.G1157V	0	12.08
6	132939256	6:132939256:T:A	T	A	0.000167504	2985	ADD	6.57784	2.31001	14.2035	0.00016407	exonic	TAAR2	.	nonsynonymous_SNV	TAAR2:NM_001033080:exon2:c.A89T:p.N30I	8.267e-05	24.2
6	43014845	6:43014845:C:T	C	T	0.000167729	2981	ADD	6.5778	2.30999	14.2033	0.000164085	exonic	CUL7	.	nonsynonymous_SNV	CUL7:NM_001168370:exon10:c.G2422A:p.V808M,CUL7:NM_014780:exon10:c.G2170A:p.V724M	9.088e-06	33
11	55563391	11:55563391:G:A	G	A	0.000167448	2986	ADD	6.57442	2.31	14.1932	0.000164964	exonic	OR5D14	.	nonsynonymous_SNV	OR5D14:NM_001004735:exon1:c.G360A:p.M120I	0	26
11	9810770	11:9810770:G:A	G	A	0.000167504	2985	ADD	6.5744	2.30999	14.1931	0.000164972	exonic	SBF2	.	synonymous_SNV	SBF2:NM_030962:exon35:c.C4818T:p.S1606S	8.933e-05	1.888
11	16863173	11:16863173:C:T	C	T	0.000167448	2986	ADD	6.57441	2.30999	14.1931	0.000164972	exonic	PLEKHA7	.	nonsynonymous_SNV	PLEKHA7:NM_001329630:exon9:c.G793A:p.D265N,PLEKHA7:NM_001329631:exon9:c.G793A:p.D265N,PLEKHA7:NM_175058:exon9:c.G793A:p.D265N	0.0002	29.3
11	67953337	11:67953337:G:A	G	A	0.000167616	2983	ADD	6.57437	2.30997	14.193	0.000164987	exonic	KMT5B	.	synonymous_SNV	KMT5B:NM_001369425:exon2:c.C6T:p.S2S,KMT5B:NM_001300909:exon3:c.C219T:p.S73S,KMT5B:NM_001363566:exon3:c.C219T:p.S73S,KMT5B:NM_001369426:exon3:c.C219T:p.S73S,KMT5B:NM_001369427:exon3:c.C219T:p.S73S,KMT5B:NM_016028:exon3:c.C219T:p.S73S,KMT5B:NM_017635:exon3:c.C219T:p.S73S	0.0002	9.367
2	179584318	2:179584318:A:C	A	C	0.00016756	2984	ADD	6.574	2.31	14.192	0.000165075	exonic	TTN	.	synonymous_SNV	TTN:NM_133378:exon79:c.T20169G:p.V6723V,TTN:NM_001256850:exon80:c.T22950G:p.V7650V,TTN:NM_001267550:exon82:c.T23901G:p.V7967V	6.664e-05	6.236
11	721907	11:721907:C:T	C	T	0.00016852	2967	ADD	6.57408	2.3098	14.1914	0.00016512	exonic	EPS8L2	.	synonymous_SNV	EPS8L2:NM_022772:exon11:c.C900T:p.G300G	4.505e-05	9.941
11	113270220	11:113270220:T:C	T	C	0.000168691	2964	ADD	6.57382	2.30965	14.1901	0.000165234	exonic	ANKK1	.	nonsynonymous_SNV	ANKK1:NM_178510:exon8:c.T1529C:p.V510A	6.672e-05	18.8
2	186670907	2:186670907:A:G	A	G	0.000170416	2934	ADD	6.57324	2.30956	14.1881	0.000165417	exonic	FSIP2	.	nonsynonymous_SNV	FSIP2:NM_173651:exon17:c.A16874G:p.K5625R	0	9.6
1	201974712	1:201974712:G:C	G	C	0.0682731	2988	ADD	1.03114	0.243806	14.1843	0.000165752	exonic	RNPEP	.	synonymous_SNV	RNPEP:NM_001319183:exon10:c.G951C:p.L317L,RNPEP:NM_001319184:exon10:c.G951C:p.L317L,RNPEP:NM_001319182:exon11:c.G1428C:p.L476L,RNPEP:NM_020216:exon11:c.G1821C:p.L607L	0.0828	9.795
10	124914542	10:124914542:A:G	A	G	0.000502344	2986	ADD	4.81171	1.33785	14.1808	0.000166062	exonic	BUB3	.	nonsynonymous_SNV	BUB3:NM_001007793:exon2:c.A109G:p.T37A,BUB3:NM_004725:exon2:c.A109G:p.T37A	6.666e-05	21
6	24780892	6:24780892:A:C	A	C	0.0308932	2978	ADD	1.26665	0.288276	14.1677	0.000167217	exonic	GMNN	.	nonsynonymous_SNV	GMNN:NM_001251989:exon3:c.A53C:p.N18T,GMNN:NM_001251990:exon3:c.A53C:p.N18T,GMNN:NM_001251991:exon3:c.A53C:p.N18T,GMNN:NM_015895:exon3:c.A53C:p.N18T	0.552	17.45
23	30268697	X:30268697:C:T	C	T	0.00016728	2989	ADD	6.54361	2.31005	14.1015	0.000173201	exonic	MAGEB1	.	synonymous_SNV	MAGEB1:NM_177404:exon2:c.C87T:p.H29H,MAGEB1:NM_177415:exon3:c.C87T:p.H29H,MAGEB1:NM_002363:exon4:c.C87T:p.H29H	0.001	NA
23	150349094	X:150349094:C:T	C	T	0.00016728	2989	ADD	6.54361	2.31005	14.1015	0.000173201	exonic	GPR50	.	nonsynonymous_SNV	GPR50:NM_004224:exon2:c.C1039T:p.R347C	0.0011	NA
23	83127950	X:83127950:G:A	G	A	0.000168011	2976	ADD	6.54338	2.30991	14.1004	0.000173309	exonic	CYLC1	.	synonymous_SNV	CYLC1:NM_021118:exon4:c.G234A:p.R78R	0.0002	NA
21	47817403	21:47817403:A:G	A	G	0.00016728	2989	ADD	6.54153	2.31005	14.0953	0.000173776	exonic	PCNT	.	nonsynonymous_SNV	PCNT:NM_001315529:exon22:c.A4087G:p.M1363V,PCNT:NM_006031:exon22:c.A4441G:p.M1481V	6.541e-05	24.6
21	19715953	21:19715953:T:C	T	C	0.000167673	2982	ADD	6.5414	2.30997	14.0947	0.000173836	exonic	TMPRSS15	.	nonsynonymous_SNV	TMPRSS15:NM_002772:exon12:c.A1298G:p.N433S	0	22.4
3	49712629	3:49712629:G:A	G	A	0.000167336	2988	ADD	6.53991	2.31004	14.0905	0.000174221	exonic	APEH	.	synonymous_SNV	APEH:NM_001640:exon3:c.G159A:p.R53R	0.0003	13.81
3	69928428	3:69928428:C:A	C	A	0.000167336	2988	ADD	6.53991	2.31004	14.0905	0.000174225	exonic	MITF	.	nonsynonymous_SNV	MITF:NM_001184967:exon2:c.C92A:p.A31D,MITF:NM_001354604:exon2:c.C248A:p.A83D,MITF:NM_001354605:exon2:c.C245A:p.A82D,MITF:NM_001354606:exon2:c.C245A:p.A82D,MITF:NM_006722:exon2:c.C245A:p.A82D,MITF:NM_198159:exon2:c.C248A:p.A83D,MITF:NM_198177:exon2:c.C200A:p.A67D,MITF:NM_001354607:exon3:c.C197A:p.A66D,MITF:NM_001354608:exon3:c.C92A:p.A31D	6.662e-05	22.9
3	130286098	3:130286098:CT:C	CT	C	0.000167448	2986	ADD	6.5399	2.31004	14.0904	0.000174229	exonic	COL6A6	.	frameshift_deletion	COL6A6:NM_001102608:exon4:c.1836delT:p.E613Kfs*7	4.69e-05	23.4
3	45870074	3:45870074:C:T	C	T	0.000167504	2985	ADD	6.53977	2.30996	14.0898	0.000174289	exonic	LZTFL1	.	nonsynonymous_SNV	LZTFL1:NM_020347:exon8:c.G634A:p.E212K,LZTFL1:NM_001276379:exon9:c.G622A:p.E208K,LZTFL1:NM_001276378:exon10:c.G583A:p.E195K	6.663e-05	24.8
3	25674072	3:25674072:T:C	T	C	0.000168577	2966	ADD	6.53929	2.30968	14.0874	0.000174514	exonic	TOP2B	.	synonymous_SNV	TOP2B:NM_001068:exon10:c.A1116G:p.V372V,TOP2B:NM_001330700:exon10:c.A1131G:p.V377V	3.74e-05	9.866
9	127287114	9:127287114:A:G	A	G	0.000502681	2984	ADD	4.67636	1.31174	14.0715	0.000175991	exonic	NR6A1	.	synonymous_SNV	NR6A1:NM_001278546:exon9:c.T1228C:p.L410L,NR6A1:NM_001489:exon9:c.T1225C:p.L409L,NR6A1:NM_033334:exon9:c.T1240C:p.L414L	0.0069	7.542
1	177899699	1:177899699:T:C	T	C	0.000334896	2986	ADD	5.64867	2.14785	14.0315	0.000179779	exonic	CRYZL2P-SEC16B\x3bSEC16B	.	nonsynonymous_SNV	SEC16B:NM_001356500:exon24:c.A2069G:p.N690S,SEC16B:NM_033127:exon25:c.A3092G:p.N1031S,CRYZL2P-SEC16B:NM_001356506:exon31:c.A3095G:p.N1032S,CRYZL2P-SEC16B:NM_001356505:exon33:c.A3095G:p.N1032S	0.0537	25.9
18	60242604	18:60242604:G:A	G	A	0.00016728	2989	ADD	6.51831	2.31004	14.0262	0.000180285	exonic	ZCCHC2	.	nonsynonymous_SNV	ZCCHC2:NM_017742:exon13:c.G3290A:p.G1097D	0	26.4
9	32631893	9:32631893:C:A	C	A	0.00016728	2989	ADD	6.50444	2.31103	13.9804	0.000184727	exonic	TAF1L	.	nonsynonymous_SNV	TAF1L:NM_153809:exon1:c.G3685T:p.A1229S	0.0002	20.5
9	35074492	9:35074492:CT:C	CT	C	0.000167336	2988	ADD	6.50444	2.31103	13.9804	0.000184727	splicing	FANCG	NM_004629:exon13:c.1637-2A>-	.	.	0	21.7
9	130672328	9:130672328:C:T	C	T	0.000167392	2987	ADD	6.50442	2.31102	13.9803	0.00018474	exonic	ST6GALNAC4	.	synonymous_SNV	ST6GALNAC4:NM_175040:exon4:c.G369A:p.S123S,ST6GALNAC4:NM_175039:exon5:c.G621A:p.S207S	9.021e-06	3.553
9	135933233	9:135933233:G:A	G	A	0.000168124	2974	ADD	6.50426	2.31092	13.9795	0.00018482	exonic	GTF3C5	.	nonsynonymous_SNV	GTF3C5:NM_001286709:exon9:c.G904A:p.G302R,GTF3C5:NM_012087:exon11:c.G1426A:p.G476R,GTF3C5:NM_001122823:exon12:c.G1447A:p.G483R	0.0002	16.15
13	113743993	13:113743993:G:A	G	A	0.000167336	2988	ADD	6.50109	2.31001	13.9749	0.000185272	exonic	MCF2L	.	synonymous_SNV	MCF2L:NM_001366645:exon24:c.G2790A:p.E930E,MCF2L:NM_001366646:exon24:c.G2790A:p.E930E,MCF2L:NM_001112732:exon26:c.G2904A:p.E968E,MCF2L:NM_001320815:exon26:c.G2898A:p.E966E,MCF2L:NM_001320816:exon26:c.G2916A:p.E972E,MCF2L:NM_001320817:exon26:c.G2898A:p.E966E,MCF2L:NM_001366644:exon26:c.G2817A:p.E939E,MCF2L:NM_024979:exon26:c.G2898A:p.E966E	0.0001	0.343
13	76378538	13:76378538:A:G	A	G	0.000167673	2982	ADD	6.50103	2.30998	13.9746	0.000185298	exonic	LMO7	.	nonsynonymous_SNV	LMO7:NM_015842:exon5:c.A76G:p.N26D,LMO7:NM_001330583:exon6:c.A76G:p.N26D,LMO7:NM_001366632:exon6:c.A76G:p.N26D,LMO7:NM_001366633:exon6:c.A649G:p.N217D,LMO7:NM_001366634:exon6:c.A76G:p.N26D,LMO7:NM_001366636:exon6:c.A76G:p.N26D,LMO7:NM_001306080:exon8:c.A775G:p.N259D,LMO7:NM_005358:exon9:c.A931G:p.N311D	0	26.1
13	52520550	13:52520550:G:A	G	A	0.000334672	2988	ADD	4.90586	1.90673	13.9523	0.000187512	exonic	ATP7B	.	nonsynonymous_SNV	ATP7B:NM_001005918:exon9:c.C2309T:p.T770M,ATP7B:NM_001330579:exon11:c.C2678T:p.T893M,ATP7B:NM_001330578:exon12:c.C2696T:p.T899M,ATP7B:NM_000053:exon13:c.C2930T:p.T977M,ATP7B:NM_001243182:exon14:c.C2597T:p.T866M	0.0002	26
10	71129303	10:71129303:C:T	C	T	0.000167392	2987	ADD	6.47821	2.31001	13.9061	0.000192176	exonic	HK1	.	synonymous_SNV	HK1:NM_001322367:exon6:c.C702T:p.D234D,HK1:NM_000188:exon7:c.C798T:p.D266D,HK1:NM_001322366:exon7:c.C714T:p.D238D,HK1:NM_033496:exon7:c.C795T:p.D265D,HK1:NM_001322364:exon9:c.C810T:p.D270D,HK1:NM_001358263:exon10:c.C810T:p.D270D,HK1:NM_033497:exon10:c.C810T:p.D270D,HK1:NM_033498:exon10:c.C810T:p.D270D,HK1:NM_033500:exon11:c.C762T:p.D254D,HK1:NM_001322365:exon12:c.C903T:p.D301D	0.0005	3.182
22	30857443	22:30857443:G:T	G	T	0.000167336	2988	ADD	6.47373	2.3101	13.893	0.000193517	exonic	SEC14L3	.	nonsynonymous_SNV	SEC14L3:NM_174975:exon11:c.C935A:p.A312E,SEC14L3:NM_001257379:exon12:c.C758A:p.A253E,SEC14L3:NM_001257382:exon12:c.C758A:p.A253E,SEC14L3:NM_001257378:exon13:c.C704A:p.A235E	1.801e-05	6.167
22	33245493	22:33245493:C:T	C	T	0.00016728	2989	ADD	6.47374	2.3101	13.893	0.000193517	exonic	TIMP3	.	nonsynonymous_SNV	TIMP3:NM_000362:exon2:c.C176T:p.T59M	5.809e-05	24.9
22	39966878	22:39966878:C:T	C	T	0.000167336	2988	ADD	6.47372	2.31009	13.8929	0.000193526	exonic	CACNA1I	.	nonsynonymous_SNV	CACNA1I:NM_001003406:exon1:c.C121T:p.P41S,CACNA1I:NM_021096:exon1:c.C121T:p.P41S	0	16.97
22	29442798	22:29442798:G:A	G	A	0.000167673	2982	ADD	6.47366	2.31006	13.8926	0.000193557	exonic	ZNRF3	.	nonsynonymous_SNV	ZNRF3:NM_001206998:exon6:c.G839A:p.G280E,ZNRF3:NM_032173:exon6:c.G539A:p.G180E	0	24.6
4	6303907	4:6303907:G:GGAC	G	GGAC	0.000848608	2946	ADD	4.31919	1.01581	13.8917	0.000193656	exonic	WFS1	.	nonframeshift_insertion	WFS1:NM_001145853:exon8:c.2385_2386insGAC:p.D797_V798insD,WFS1:NM_006005:exon8:c.2385_2386insGAC:p.D797_V798insD	0.0084	18.66
8	123966084	8:123966084:C:T	C	T	0.000167336	2988	ADD	6.4681	2.31009	13.8761	0.000195268	exonic	ZHX2	.	synonymous_SNV	ZHX2:NM_014943:exon3:c.C2334T:p.D778D,ZHX2:NM_001362797:exon4:c.C2334T:p.D778D	0.0001	1.184
8	110255331	8:110255331:A:G	A	G	0.000167448	2986	ADD	6.46808	2.31008	13.876	0.000195277	exonic	NUDCD1	.	synonymous_SNV	NUDCD1:NM_001128211:exon10:c.T1572C:p.N524N,NUDCD1:NM_032869:exon10:c.T1659C:p.N553N	0	7.859
8	33454931	8:33454931:T:A	T	A	0.00016852	2967	ADD	6.46775	2.30989	13.8743	0.000195452	exonic	DUSP26	.	nonsynonymous_SNV	DUSP26:NM_001305116:exon1:c.A103T:p.M35L,DUSP26:NM_001305115:exon2:c.A103T:p.M35L,DUSP26:NM_024025:exon2:c.A103T:p.M35L	8.951e-06	16.3
8	120584444	8:120584444:G:A	G	A	0.000168294	2971	ADD	6.46768	2.30985	13.874	0.000195483	exonic	ENPP2	.	synonymous_SNV	ENPP2:NM_001130863:exon20:c.C1827T:p.N609N,ENPP2:NM_001330600:exon20:c.C1815T:p.N605N	4.314e-05	22
8	31498070	8:31498070:C:A	C	A	0.000169664	2947	ADD	6.46745	2.30971	13.8728	0.000195614	exonic	NRG1	.	nonsynonymous_SNV	NRG1:NM_013962:exon1:c.C570A:p.H190Q	0	19.84
11	117160380	11:117160380:T:G	T	G	0.00100435	2987	ADD	4.19102	0.935588	13.8345	0.000199641	exonic	BACE1	.	nonsynonymous_SNV	BACE1:NM_001207048:exon8:c.A1108C:p.M370L,BACE1:NM_001207049:exon8:c.A1033C:p.M345L,BACE1:NM_012104:exon9:c.A1408C:p.M470L,BACE1:NM_138971:exon9:c.A1276C:p.M426L,BACE1:NM_138972:exon9:c.A1333C:p.M445L,BACE1:NM_138973:exon9:c.A1201C:p.M401L	0.0033	22.2
12	54910758	12:54910758:G:A	G	A	0.000334672	2988	ADD	4.89545	1.92979	13.6563	0.000219508	exonic	NCKAP1L	.	synonymous_SNV	NCKAP1L:NM_001184976:exon11:c.G927A:p.P309P,NCKAP1L:NM_005337:exon11:c.G1077A:p.P359P	0.0017	11.07
11	100064305	11:100064305:T:C	T	C	0.00219372	2963	ADD	3.10938	0.676444	13.638	0.000221656	exonic	CNTN5	.	synonymous_SNV	CNTN5:NM_175566:exon12:c.T1572C:p.D524D,CNTN5:NM_001243270:exon14:c.T1794C:p.D598D,CNTN5:NM_001243271:exon15:c.T1794C:p.D598D,CNTN5:NM_014361:exon15:c.T1794C:p.D598D	0.0021	2.694
20	43353606	20:43353606:C:T	C	T	0.000347584	2877	ADD	5.35078	2.10897	13.5741	0.000229324	exonic	CCN5	.	synonymous_SNV	CCN5:NM_003881:exon3:c.C505T:p.L169L,CCN5:NM_001323370:exon4:c.C505T:p.L169L	0.0119	1.203
16	325035	16:325035:G:A	G	A	0.00610394	2867	ADD	2.25036	0.498365	13.5215	0.000235847	exonic	RGS11	.	nonsynonymous_SNV	RGS11:NM_001286485:exon4:c.C259T:p.P87S,RGS11:NM_003834:exon4:c.C196T:p.P66S,RGS11:NM_183337:exon4:c.C259T:p.P87S	0.0076	23
10	104836853	10:104836853:C:T	C	T	0.064173	2914	ADD	0.969243	0.237863	13.3553	0.000257691	exonic	CNNM2	.	synonymous_SNV	CNNM2:NM_199076:exon7:c.C2478T:p.D826D,CNNM2:NM_017649:exon8:c.C2544T:p.D848D	0.106	4.289
1	150620852	1:150620852:T:C	T	C	0.00434928	2989	ADD	2.55141	0.563183	13.3417	0.000259567	exonic	GOLPH3L	.	nonsynonymous_SNV	GOLPH3L:NM_018178:exon5:c.A803G:p.K268R	0.0048	24.2
1	207760852	1:207760852:G:A	G	A	0.000502008	2988	ADD	4.45555	1.26342	13.2858	0.000267424	exonic	CR1	.	nonsynonymous_SNV	CR1:NM_000573:exon26:c.G4302A:p.M1434I,CR1:NM_000651:exon34:c.G5652A:p.M1884I	0.0081	15.56
9	130211635	9:130211635:C:T	C	T	0.00119536	2928	ADD	3.86926	0.841771	13.2631	0.000270682	exonic	RPL12	.	nonsynonymous_SNV	RPL12:NM_000976:exon4:c.G217A:p.V73M	0.0021	25.1
5	1036435	5:1036435:G:A	G	A	0.039196	2985	ADD	1.23479	0.29496	13.1813	0.000282748	exonic	NKD2	.	synonymous_SNV	NKD2:NM_001271082:exon9:c.G723A:p.T241T,NKD2:NM_033120:exon9:c.G723A:p.T241T	0.0647	3.647
19	9869348	19:9869348:A:G	A	G	0.000669568	2987	ADD	4.43817	1.15408	13.0936	0.000296313	exonic	ZNF846	.	synonymous_SNV	ZNF846:NM_001353798:exon5:c.T18C:p.T6T,ZNF846:NM_001077624:exon6:c.T405C:p.T135T,ZNF846:NM_001353799:exon6:c.T402C:p.T134T,ZNF846:NM_001353800:exon6:c.T402C:p.T134T	0.0033	7.304
16	19047001	16:19047001:G:A	G	A	0.00217683	2986	ADD	3.04288	0.684068	13.0909	0.000296736	exonic	TMC7	.	synonymous_SNV	TMC7:NM_001160364:exon7:c.G531A:p.S177S,TMC7:NM_001300732:exon7:c.G861A:p.S287S,TMC7:NM_001324265:exon7:c.G861A:p.S287S,TMC7:NM_024847:exon7:c.G861A:p.S287S	0.0031	9.348
10	25465161	10:25465161:A:G	A	G	0.000347826	2875	ADD	5.80722	1.4473	13.0424	0.000304516	exonic	GPR158	.	nonsynonymous_SNV	GPR158:NM_020752:exon1:c.A812G:p.E271G	0.0012	32
7	21778449	7:21778449:C:T	C	T	0.707317	2911	ADD	-0.616278	0.160489	13.0309	0.000306394	exonic	DNAH11	.	synonymous_SNV	DNAH11:NM_001277115:exon47:c.C7776T:p.H2592H	0.6939	2.351
11	2441603	11:2441603:G:A	G	A	0.000838082	2983	ADD	3.81467	1.02177	12.9712	0.000316315	exonic	TRPM5	.	synonymous_SNV	TRPM5:NM_014555:exon4:c.C498T:p.D166D	0.0036	0.222
17	76803659	17:76803659:T:C	T	C	0.0205961	2986	ADD	1.49186	0.352512	12.95	0.000319926	exonic	USP36	.	nonsynonymous_SNV	USP36:NM_001321291:exon14:c.A1467G:p.I489M	0.1438	5.836
22	17280822	22:17280822:G:A	G	A	0.0545698	2987	ADD	1.051	0.257475	12.8856	0.000331116	exonic	XKR3	.	nonsynonymous_SNV	XKR3:NM_001318251:exon3:c.C428T:p.T143M,XKR3:NM_175878:exon3:c.C428T:p.T143M	0.2172	0.019
20	60734992	20:60734992:A:G	A	G	0.000172592	2897	ADD	6.13887	2.31112	12.8847	0.000331268	exonic	SS18L1	.	nonsynonymous_SNV	SS18L1:NM_198935:exon3:c.A206G:p.Q69R	0	26.9
11	129722548	11:129722548:C:T	C	T	0.00016728	2989	ADD	6.13509	2.31117	12.8807	0.000331979	exonic	TMEM45B	.	synonymous_SNV	TMEM45B:NM_138788:exon2:c.C171T:p.S57S,TMEM45B:NM_001331210:exon3:c.C171T:p.S57S,TMEM45B:NM_001331211:exon3:c.C171T:p.S57S,TMEM45B:NM_001331212:exon3:c.C171T:p.S57S	6.663e-05	0.006
11	123909642	11:123909642:C:T	C	T	0.000167504	2985	ADD	6.13503	2.31114	12.8805	0.000332032	exonic	OR10G7	.	nonsynonymous_SNV	OR10G7:NM_001004463:exon1:c.G67A:p.A23T	0.0001	0.001
11	47296545	11:47296545:C:T	C	T	0.000167504	2985	ADD	6.135	2.31112	12.8803	0.000332055	exonic	MADD	.	nonsynonymous_SNV	MADD:NM_001135943:exon3:c.C494T:p.A165V,MADD:NM_001135944:exon3:c.C494T:p.A165V,MADD:NM_003682:exon3:c.C494T:p.A165V,MADD:NM_130470:exon3:c.C494T:p.A165V,MADD:NM_130471:exon3:c.C494T:p.A165V,MADD:NM_130472:exon3:c.C494T:p.A165V,MADD:NM_130473:exon3:c.C494T:p.A165V,MADD:NM_130474:exon3:c.C494T:p.A165V,MADD:NM_130475:exon3:c.C494T:p.A165V,MADD:NM_130476:exon3:c.C494T:p.A165V	0.0018	11.45
11	46334429	11:46334429:T:C	T	C	0.00016756	2984	ADD	6.13496	2.3111	12.8801	0.000332086	exonic	CREB3L1	.	synonymous_SNV	CREB3L1:NM_052854:exon8:c.T990C:p.N330N	0.0001	5.88
11	47819601	11:47819601:C:T	C	T	0.000168577	2966	ADD	6.13462	2.3109	12.8785	0.000332376	exonic	NUP160	.	nonsynonymous_SNV	NUP160:NM_015231:exon26:c.G3112A:p.V1038M	0.0002	26.9
10	126660543	10:126660543:C:G	C	G	0.000167336	2988	ADD	6.13394	2.3118	12.8746	0.000333081	exonic	ZRANB1	.	nonsynonymous_SNV	ZRANB1:NM_017580:exon3:c.C1012G:p.Q338E	6.667e-05	20.9
10	12215730	10:12215730:G:A	G	A	0.000167392	2987	ADD	6.13392	2.31179	12.8744	0.000333096	exonic	NUDT5	.	synonymous_SNV	NUDT5:NM_001321647:exon6:c.C372T:p.A124A,NUDT5:NM_014142:exon6:c.C372T:p.A124A,NUDT5:NM_001321648:exon7:c.C114T:p.A38A	3.249e-05	8.568
10	135184089	10:135184089:G:A	G	A	0.000167616	2983	ADD	6.13386	2.31175	12.8742	0.00033315	exonic	ECHS1	.	synonymous_SNV	ECHS1:NM_004092:exon2:c.C261T:p.L87L	3.172e-05	10.1
10	74970161	10:74970161:A:C	A	C	0.000167392	2987	ADD	6.13381	2.31172	12.8739	0.000333188	exonic	FAM149B1	.	nonsynonymous_SNV	FAM149B1:NM_173348:exon7:c.A863C:p.Q288P	0	23.2
10	111643864	10:111643864:A:C	A	C	0.000167336	2988	ADD	6.13382	2.31173	12.874	0.000333188	exonic	XPNPEP1	.	nonsynonymous_SNV	XPNPEP1:NM_001324128:exon7:c.T449G:p.V150G,XPNPEP1:NM_001324134:exon7:c.T269G:p.V90G,XPNPEP1:NM_001324132:exon8:c.T662G:p.V221G,XPNPEP1:NM_001167604:exon9:c.T791G:p.V264G,XPNPEP1:NM_001324133:exon9:c.T791G:p.V264G,XPNPEP1:NM_001324135:exon9:c.T791G:p.V264G,XPNPEP1:NM_001324136:exon9:c.T776G:p.V259G,XPNPEP1:NM_020383:exon9:c.T791G:p.V264G,XPNPEP1:NM_001324131:exon10:c.T449G:p.V150G	0	26.4
10	73578797	10:73578797:G:A	G	A	0.000167448	2986	ADD	6.13381	2.31172	12.8739	0.000333196	exonic	PSAP	.	synonymous_SNV	PSAP:NM_001042466:exon12:c.C1428T:p.F476F,PSAP:NM_002778:exon12:c.C1422T:p.F474F,PSAP:NM_001042465:exon13:c.C1431T:p.F477F	0.001	12.39
10	76797789	10:76797789:G:A	G	A	0.000167392	2987	ADD	6.1338	2.31172	12.8739	0.000333204	exonic	DUPD1	.	synonymous_SNV	DUPD1:NM_001003892:exon3:c.C468T:p.T156T	0	8.691
10	68687345	10:68687345:T:C	T	C	0.000167729	2981	ADD	6.1337	2.31166	12.8734	0.000333288	exonic	LRRTM3	.	nonsynonymous_SNV	LRRTM3:NM_178011:exon2:c.T671C:p.L224P	0	24.7
18	57006058	18:57006058:T:C	T	C	0.000167392	2987	ADD	6.13254	2.31118	12.873	0.00033335	exonic	LMAN1	.	synonymous_SNV	LMAN1:NM_005570:exon9:c.A1083G:p.R361R	6.535e-05	16.8
18	12971245	18:12971245:C:T	C	T	0.000167336	2988	ADD	6.13253	2.31118	12.873	0.000333357	exonic	SEH1L	.	synonymous_SNV	SEH1L:NM_001013437:exon5:c.C615T:p.N205N,SEH1L:NM_031216:exon5:c.C615T:p.N205N	0.0612	10.96
18	29104490	18:29104490:A:G	A	G	0.000167336	2988	ADD	6.13253	2.31118	12.873	0.000333357	exonic	DSG2	.	nonsynonymous_SNV	DSG2:NM_001943:exon7:c.A770G:p.Q257R	6.661e-05	24.9
18	13053022	18:13053022:C:T	C	T	0.000167392	2987	ADD	6.13251	2.31117	12.8729	0.000333373	exonic	CEP192	.	nonsynonymous_SNV	CEP192:NM_032142:exon18:c.C3122T:p.T1041M	2.981e-05	24.4
18	63430163	18:63430163:C:T	C	T	0.000167504	2985	ADD	6.1325	2.31116	12.8728	0.00033338	exonic	CDH7	.	nonsynonymous_SNV	CDH7:NM_001317214:exon2:c.C85T:p.L29F,CDH7:NM_001362438:exon2:c.C85T:p.L29F,CDH7:NM_004361:exon2:c.C85T:p.L29F,CDH7:NM_033646:exon2:c.C85T:p.L29F	1.793e-05	17.98
18	64176277	18:64176277:T:C	T	C	0.000167842	2979	ADD	6.13232	2.31105	12.872	0.000333534	exonic	CDH19	.	nonsynonymous_SNV	CDH19:NM_021153:exon11:c.A1783G:p.T595A	6.545e-05	12.38
2	64211017	2:64211017:C:A	C	A	0.000335008	2985	ADD	5.68287	1.42216	12.8555	0.000336496	exonic	VPS54	.	synonymous_SNV	VPS54:NM_001005739:exon2:c.G117T:p.V39V,VPS54:NM_016516:exon2:c.G117T:p.V39V	0.0002	10.23
1	52851599	1:52851599:C:T	C	T	0.000167336	2988	ADD	6.12535	2.31135	12.8538	0.000336798	exonic	ORC1	.	nonsynonymous_SNV	ORC1:NM_001190818:exon9:c.G1406A:p.C469Y,ORC1:NM_001190819:exon9:c.G1391A:p.C464Y,ORC1:NM_004153:exon9:c.G1406A:p.C469Y	0.0348	0.046
1	17958929	1:17958929:C:T	C	T	0.00016728	2989	ADD	6.12467	2.31097	12.8508	0.000337342	exonic	ARHGEF10L	.	synonymous_SNV	ARHGEF10L:NM_001319838:exon6:c.C822T:p.N274N,ARHGEF10L:NM_001328124:exon8:c.C1032T:p.N344N,ARHGEF10L:NM_001011722:exon14:c.C1581T:p.N527N,ARHGEF10L:NM_001319837:exon14:c.C1581T:p.N527N,ARHGEF10L:NM_018125:exon16:c.C1698T:p.N566N	0.0001	8.656
1	26301029	1:26301029:C:T	C	T	0.00016728	2989	ADD	6.12467	2.31097	12.8508	0.000337342	exonic	PAFAH2	.	nonsynonymous_SNV	PAFAH2:NM_000437:exon9:c.G871A:p.V291I	6.663e-05	12.17
1	52991387	1:52991387:G:A	G	A	0.000167336	2988	ADD	6.12467	2.31096	12.8508	0.000337342	exonic	TUT4	.	nonsynonymous_SNV	TUT4:NM_001009881:exon2:c.C566T:p.T189I,TUT4:NM_015269:exon2:c.C566T:p.T189I	0.0478	16.52
1	53370728	1:53370728:C:T	C	T	0.00016728	2989	ADD	6.12467	2.31097	12.8508	0.000337342	exonic	ECHDC2	.	synonymous_SNV	ECHDC2:NM_001198962:exon5:c.G399A:p.T133T,ECHDC2:NM_018281:exon5:c.G399A:p.T133T,ECHDC2:NM_001198961:exon6:c.G492A:p.T164T,ECHDC2:NM_001319958:exon6:c.G261A:p.T87T	0.0191	1.65
1	55248027	1:55248027:C:G	C	G	0.00016728	2989	ADD	6.12467	2.31097	12.8508	0.000337342	exonic	TTC22	.	nonsynonymous_SNV	TTC22:NM_001114108:exon6:c.G1144C:p.G382R	0.0234	21.9
1	57411642	1:57411642:C:G	C	G	0.00016728	2989	ADD	6.12467	2.31097	12.8508	0.000337342	exonic	C8B	.	nonsynonymous_SNV	C8B:NM_000066:exon7:c.G957C:p.Q319H,C8B:NM_001278543:exon8:c.G801C:p.Q267H,C8B:NM_001278544:exon8:c.G771C:p.Q257H	0.0064	25.6
1	65855065	1:65855065:A:T	A	T	0.00016728	2989	ADD	6.12467	2.31097	12.8508	0.000337342	exonic	DNAJC6	.	synonymous_SNV	DNAJC6:NM_001256864:exon10:c.A1320T:p.T440T,DNAJC6:NM_014787:exon10:c.A1149T:p.T383T,DNAJC6:NM_001256865:exon11:c.A1110T:p.T370T	0.0141	8.252
1	57173290	1:57173290:C:T	C	T	0.000167336	2988	ADD	6.12465	2.31096	12.8507	0.000337349	exonic	PRKAA2	.	synonymous_SNV	PRKAA2:NM_006252:exon9:c.C1563T:p.T521T	0.0061	0.167
1	9083091	1:9083091:G:A	G	A	0.000167336	2988	ADD	6.12465	2.31095	12.8507	0.000337357	exonic	SLC2A7	.	nonsynonymous_SNV	SLC2A7:NM_207420:exon3:c.C197T:p.T66I	0	8.984
1	221055522	1:221055522:C:G	C	G	0.000167336	2988	ADD	6.12465	2.31095	12.8507	0.000337357	exonic	HLX	.	synonymous_SNV	HLX:NM_021958:exon3:c.C789G:p.L263L	8.97e-06	11.96
1	212273960	1:212273960:C:T	C	T	0.000167448	2986	ADD	6.12463	2.31094	12.8506	0.000337373	exonic	DTL	.	nonsynonymous_SNV	DTL:NM_001286229:exon12:c.C815T:p.A272V,DTL:NM_001286230:exon13:c.C1502T:p.A501V,DTL:NM_016448:exon14:c.C1628T:p.A543V	2.695e-05	21.4
1	86341002	1:86341002:G:A	G	A	0.000167504	2985	ADD	6.12463	2.31094	12.8506	0.000337381	exonic	COL24A1	.	synonymous_SNV	COL24A1:NM_001349955:exon34:c.C942T:p.G314G,COL24A1:NM_152890:exon34:c.C3042T:p.G1014G	6.664e-05	8.171
1	3425690	1:3425690:C:A	C	A	0.000167898	2978	ADD	6.1244	2.31081	12.8495	0.000337575	exonic	MEGF6	.	nonsynonymous_SNV	MEGF6:NM_001409:exon12:c.G1477T:p.D493Y	2.003e-05	17.41
2	133174848	2:133174848:C:T	C	T	0.000167336	2988	ADD	6.12144	2.3112	12.8399	0.000339297	exonic	GPR39	.	nonsynonymous_SNV	GPR39:NM_001508:exon1:c.C233T:p.S78L	0.0056	29.9
2	69002417	2:69002417:C:T	C	T	0.000167336	2988	ADD	6.12143	2.3112	12.8399	0.000339305	exonic	ARHGAP25	.	synonymous_SNV	ARHGAP25:NM_001166276:exon1:c.C105T:p.N35N,ARHGAP25:NM_014882:exon1:c.C105T:p.N35N,ARHGAP25:NM_001007231:exon2:c.C126T:p.N42N,ARHGAP25:NM_001166277:exon2:c.C126T:p.N42N,ARHGAP25:NM_001364819:exon2:c.C126T:p.N42N,ARHGAP25:NM_001364820:exon2:c.C126T:p.N42N,ARHGAP25:NM_001364821:exon2:c.C48T:p.N16N	8.951e-06	12.18
2	113993157	2:113993157:G:T	G	T	0.000167504	2985	ADD	6.12142	2.31119	12.8399	0.000339313	exonic	PAX8	.	nonsynonymous_SNV	PAX8:NM_003466:exon9:c.C901A:p.P301T	3.671e-05	23.8
2	127806101	2:127806101:G:A	G	A	0.000167448	2986	ADD	6.12142	2.31119	12.8399	0.000339313	UTR3	BIN1	NM_001320634:c.*1C>T\x3bNM_001320642:c.*1C>T\x3bNM_001320632:c.*1C>T\x3bNM_139346:c.*1C>T\x3bNM_139349:c.*1C>T\x3bNM_001320640:c.*1C>T\x3bNM_139347:c.*1C>T\x3bNM_139351:c.*1C>T\x3bNM_001320633:c.*1C>T\x3bNM_139350:c.*1C>T\x3bNM_139348:c.*1C>T\x3bNM_139343:c.*1C>T\x3bNM_139344:c.*1C>T\x3bNM_001320641:c.*1C>T\x3bNM_004305:c.*1C>T\x3bNM_139345:c.*1C>T	.	.	0.0002	10.23
20	10386134	20:10386134:C:T	C	T	0.00100637	2981	ADD	3.78531	0.859701	12.8396	0.000339367	exonic	MKKS	.	nonsynonymous_SNV	MKKS:NM_018848:exon6:c.G1474A:p.D492N,MKKS:NM_170784:exon6:c.G1474A:p.D492N	0.0012	23.5
2	89037592	2:89037592:A:T	A	T	0.000167616	2983	ADD	6.12133	2.31114	12.8394	0.000339391	exonic	RPIA	.	synonymous_SNV	RPIA:NM_144563:exon8:c.A837T:p.P279P	8.955e-06	24
2	99778982	2:99778982:T:C	T	C	0.000167842	2979	ADD	6.12129	2.31112	12.8393	0.000339422	exonic	LIPT1	.	nonsynonymous_SNV	LIPT1:NM_145199:exon2:c.T562C:p.F188L,LIPT1:NM_001204830:exon3:c.T562C:p.F188L,LIPT1:NM_015929:exon3:c.T562C:p.F188L,LIPT1:NM_145197:exon4:c.T562C:p.F188L,LIPT1:NM_145198:exon4:c.T562C:p.F188L	1.791e-05	1.814
2	26533863	2:26533863:G:A	G	A	0.000167616	2983	ADD	6.12125	2.31109	12.8391	0.000339453	exonic	ADGRF3	.	synonymous_SNV	ADGRF3:NM_153835:exon8:c.C2136T:p.Y712Y,ADGRF3:NM_001145169:exon10:c.C2526T:p.Y842Y,ADGRF3:NM_001321971:exon10:c.C2529T:p.Y843Y,ADGRF3:NM_001145168:exon11:c.C2733T:p.Y911Y,ADGRF3:NM_001321975:exon11:c.C1542T:p.Y514Y	6.676e-05	3.841
2	160801440	2:160801440:C:G	C	G	0.000168011	2976	ADD	6.12121	2.31107	12.8389	0.000339485	exonic	PLA2R1	.	nonsynonymous_SNV	PLA2R1:NM_001195641:exon28:c.G4115C:p.G1372A,PLA2R1:NM_007366:exon28:c.G4121C:p.G1374A	1.794e-05	26
2	36583692	2:36583692:G:A	G	A	0.00016835	2970	ADD	6.12118	2.31105	12.8387	0.000339524	exonic	CRIM1	.	nonsynonymous_SNV	CRIM1:NM_016441:exon1:c.G257A:p.R86Q	9.085e-06	22.2
19	15226666	19:15226666:G:A	G	A	0.000167392	2987	ADD	6.12103	2.31121	12.8387	0.000339524	exonic	ILVBL	.	nonsynonymous_SNV	ILVBL:NM_006844:exon14:c.C1609T:p.H537Y	0	28.3
19	36159507	19:36159507:G:A	G	A	0.000167448	2986	ADD	6.12103	2.31121	12.8387	0.000339524	exonic	UPK1A	.	nonsynonymous_SNV	UPK1A:NM_001281443:exon3:c.G236A:p.S79N,UPK1A:NM_007000:exon3:c.G236A:p.S79N	8.961e-06	23.4
19	38376771	19:38376771:C:T	C	T	0.000167448	2986	ADD	6.12103	2.31121	12.8387	0.000339524	exonic	WDR87	.	nonsynonymous_SNV	WDR87:NM_001291088:exon6:c.G7540A:p.V2514M,WDR87:NM_031951:exon6:c.G7423A:p.V2475M	0.0012	0.001
19	46173941	19:46173941:C:T	C	T	0.000167448	2986	ADD	6.12103	2.31121	12.8387	0.000339524	exonic	GIPR	.	nonsynonymous_SNV	GIPR:NM_000164:exon3:c.C121T:p.R41W,GIPR:NM_001308418:exon3:c.C121T:p.R41W	0.0002	31
19	56538463	19:56538463:A:G	A	G	0.000167336	2988	ADD	6.12103	2.31121	12.8387	0.000339524	exonic	NLRP5	.	synonymous_SNV	NLRP5:NM_153447:exon7:c.A864G:p.S288S	6.664e-05	0.037
19	50266380	19:50266380:C:T	C	T	0.000167448	2986	ADD	6.12102	2.3112	12.8387	0.000339531	exonic	TSKS	.	nonsynonymous_SNV	TSKS:NM_021733:exon1:c.G125A:p.R42Q	0.0012	15.16
19	38990633	19:38990633:G:A	G	A	0.000167504	2985	ADD	6.12101	2.3112	12.8386	0.000339539	exonic	RYR1	.	nonsynonymous_SNV	RYR1:NM_000540:exon45:c.G7300A:p.G2434R,RYR1:NM_001042723:exon45:c.G7300A:p.G2434R	0.0001	24.8
19	10116363	19:10116363:A:C	A	C	0.000167504	2985	ADD	6.12098	2.31118	12.8385	0.000339563	exonic	COL5A3	.	nonsynonymous_SNV	COL5A3:NM_015719:exon4:c.T465G:p.D155E	0	0.095
19	15226431	19:15226431:G:A	G	A	0.000167673	2982	ADD	6.12093	2.31115	12.8382	0.00033961	exonic	ILVBL	.	nonsynonymous_SNV	ILVBL:NM_006844:exon15:c.C1666T:p.R556W	0.0006	26.9
19	33464209	19:33464209:G:A	G	A	0.00016756	2984	ADD	6.12088	2.31112	12.838	0.000339649	splicing	FAAP24	NM_152266:exon2:c.106+1G>A	.	.	0.0001	27.8
19	4510855	19:4510855:G:A	G	A	0.000168407	2969	ADD	6.12078	2.31106	12.8375	0.000339743	exonic	PLIN4	.	synonymous_SNV	PLIN4:NM_001367868:exon5:c.C3117T:p.N1039N	9.748e-05	0.017
5	160025959	5:160025959:A:G	A	G	0.000167336	2988	ADD	6.11482	2.31236	12.8172	0.000343447	exonic	ATP10B	.	nonsynonymous_SNV	ATP10B:NM_001366652:exon21:c.T3382C:p.F1128L,ATP10B:NM_001366655:exon21:c.T3382C:p.F1128L,ATP10B:NM_001366657:exon21:c.T3346C:p.F1116L,ATP10B:NM_025153:exon22:c.T3382C:p.F1128L	0	32
5	176317646	5:176317646:C:T	C	T	0.000167336	2988	ADD	6.11482	2.31236	12.8172	0.000343447	exonic	HK3	.	nonsynonymous_SNV	HK3:NM_002115:exon6:c.G620A:p.R207Q	0.0002	15.21
5	9052017	5:9052017:C:T	C	T	0.000167392	2987	ADD	6.11481	2.31236	12.8172	0.000343455	exonic	SEMA5A	.	nonsynonymous_SNV	SEMA5A:NM_003966:exon20:c.G2813A:p.R938Q	0.0002	23.8
5	176731648	5:176731648:A:T	A	T	0.000167729	2981	ADD	6.11475	2.31232	12.8168	0.00034351	exonic	PRELID1	.	nonsynonymous_SNV	PRELID1:NM_001271828:exon2:c.A115T:p.I39L,PRELID1:NM_013237:exon2:c.A115T:p.I39L	0.001	23.3
5	123983323	5:123983323:A:T	A	T	0.000167616	2983	ADD	6.11466	2.31227	12.8164	0.000343598	exonic	ZNF608	.	synonymous_SNV	ZNF608:NM_020747:exon4:c.T2754A:p.P918P	0.0002	1.349
5	140256537	5:140256537:C:G	C	G	0.000169549	2949	ADD	6.11403	2.3119	12.8135	0.000344128	exonic	PCDHA12	.	nonsynonymous_SNV	PCDHA12:NM_018903:exon1:c.C1480G:p.L494V,PCDHA12:NM_031864:exon1:c.C1480G:p.L494V	0.0001	22.9
5	140256538	5:140256538:T:G	T	G	0.000169779	2945	ADD	6.114	2.31188	12.8134	0.000344152	exonic	PCDHA12	.	nonsynonymous_SNV	PCDHA12:NM_018903:exon1:c.T1481G:p.L494R,PCDHA12:NM_031864:exon1:c.T1481G:p.L494R	0.0001	27.6
5	140071299	5:140071299:GC:G	GC	G	0.000169952	2942	ADD	6.11389	2.31182	12.8128	0.000344247	exonic	HARS2	.	frameshift_deletion	HARS2:NM_001278731:exon1:c.67delC:p.C24Afs*25,HARS2:NM_001363535:exon1:c.67delC:p.C24Afs*25,HARS2:NM_012208:exon1:c.67delC:p.C24Afs*19	0	20.2
1	111861114	1:111861114:G:A	G	A	0.000334896	2986	ADD	5.83128	1.49618	12.8073	0.000345279	splicing	CHIA	NM_001258002:exon5:c.247-1G>A\x3bNM_201653:exon9:c.730-1G>A\x3bNM_001040623:exon7:c.247-1G>A\x3bNM_001258003:exon7:c.406-1G>A\x3bNM_001258004:exon9:c.247-1G>A\x3bNM_001258005:exon8:c.247-1G>A\x3bNM_001258001:exon8:c.406-1G>A\x3bNM_021797:exon6:c.406-1G>A	.	.	0.001	33
3	184020277	3:184020277:T:C	T	C	0.00016728	2989	ADD	6.11139	2.31188	12.807	0.000345327	exonic	PSMD2	.	nonsynonymous_SNV	PSMD2:NM_001278708:exon4:c.T434C:p.M145T,PSMD2:NM_001278709:exon4:c.T347C:p.M116T,PSMD2:NM_002808:exon6:c.T824C:p.M275T	2.686e-05	21.3
3	189704588	3:189704588:A:T	A	T	0.00016728	2989	ADD	6.11139	2.31188	12.807	0.000345327	exonic	P3H2	.	nonsynonymous_SNV	P3H2:NM_001134418:exon6:c.T634A:p.Y212N,P3H2:NM_018192:exon6:c.T1177A:p.Y393N	0	27.7
3	67054676	3:67054676:G:T	G	T	0.000167336	2988	ADD	6.11139	2.31187	12.8069	0.000345335	exonic	KBTBD8	.	nonsynonymous_SNV	KBTBD8:NM_032505:exon3:c.G1285T:p.V429F	0.0002	23.1
3	129196910	3:129196910:G:A	G	A	0.000167336	2988	ADD	6.11139	2.31187	12.8069	0.000345335	exonic	IFT122	.	nonsynonymous_SNV	IFT122:NM_052990:exon9:c.G866A:p.R289Q,IFT122:NM_001280546:exon10:c.G572A:p.R191Q,IFT122:NM_018262:exon11:c.G1022A:p.R341Q,IFT122:NM_001280541:exon12:c.G1175A:p.R392Q,IFT122:NM_052989:exon12:c.G1199A:p.R400Q,IFT122:NM_001280545:exon13:c.G749A:p.R250Q,IFT122:NM_052985:exon13:c.G1352A:p.R451Q	6.664e-05	32
3	108308149	3:108308149:T:C	T	C	0.000167448	2986	ADD	6.11135	2.31185	12.8068	0.000345366	exonic	CIP2A	.	nonsynonymous_SNV	CIP2A:NM_020890:exon1:c.A74G:p.N25S	0	24.2
3	148596534	3:148596534:A:C	A	C	0.000173853	2876	ADD	6.11147	2.3119	12.8068	0.000345366	exonic	CPA3	.	nonsynonymous_SNV	CPA3:NM_001870:exon5:c.A473C:p.K158T	9.426e-06	29
3	102157378	3:102157378:C:T	C	T	0.000167616	2983	ADD	6.11134	2.31185	12.8067	0.000345374	exonic	ZPLD1	.	nonsynonymous_SNV	ZPLD1:NM_175056:exon2:c.C95T:p.P32L,ZPLD1:NM_001329788:exon3:c.C47T:p.P16L	0.0003	19.28
3	45048982	3:45048982:C:T	C	T	0.000167504	2985	ADD	6.11125	2.31179	12.8063	0.000345454	exonic	EXOSC7	.	nonsynonymous_SNV	EXOSC7:NM_015004:exon7:c.C686T:p.S229L	0.0002	25.3
9	129458674	9:129458674:G:A	G	A	0.000167504	2985	ADD	6.10924	2.31096	12.8047	0.000345748	exonic	LMX1B	.	nonsynonymous_SNV	LMX1B:NM_001174146:exon8:c.G1165A:p.V389M,LMX1B:NM_001174147:exon8:c.G1153A:p.V385M,LMX1B:NM_002316:exon8:c.G1132A:p.V378M	5.374e-05	27.3
3	196387080	3:196387080:A:G	A	G	0.000168919	2960	ADD	6.11073	2.31149	12.8038	0.000345915	exonic	NRROS	.	nonsynonymous_SNV	NRROS:NM_198565:exon3:c.A566G:p.Q189R	9.039e-06	25.9
9	133951253	9:133951253:C:CT	C	CT	0.000168748	2963	ADD	6.10897	2.3108	12.8034	0.000345995	exonic	LAMC3	.	frameshift_insertion	LAMC3:NM_006059:exon21:c.3531dupT:p.W1178Lfs*54	6.672e-05	24
9	139841140	9:139841140:C:T	C	T	0.000171527	2915	ADD	6.10805	2.31026	12.7989	0.000346825	exonic	C8G	.	synonymous_SNV	C8G:NM_000606:exon6:c.C594T:p.D198D	6.682e-05	0.827
14	103434845	14:103434845:A:G	A	G	0.000167336	2988	ADD	6.1066	2.31189	12.7927	0.000347977	exonic	CDC42BPB	.	nonsynonymous_SNV	CDC42BPB:NM_006035:exon15:c.T2204C:p.M735T	0.0001	16.01
14	95903254	14:95903254:C:T	C	T	0.000167392	2987	ADD	6.10659	2.31189	12.7926	0.000347993	exonic	SYNE3	.	nonsynonymous_SNV	SYNE3:NM_001363692:exon14:c.G2426A:p.G809E,SYNE3:NM_152592:exon14:c.G2441A:p.G814E	5.956e-05	13.91
14	74874250	14:74874250:G:A	G	A	0.000167898	2978	ADD	6.10645	2.3118	12.7919	0.000348121	exonic	SYNDIG1L	.	synonymous_SNV	SYNDIG1L:NM_001105579:exon4:c.C705T:p.N235N	6.676e-05	4.848
14	62199142	14:62199142:C:T	C	T	0.000169147	2956	ADD	6.10605	2.31157	12.79	0.000348474	exonic	HIF1A	.	synonymous_SNV	HIF1A:NM_001243084:exon7:c.C852T:p.T284T,HIF1A:NM_001530:exon7:c.C780T:p.T260T,HIF1A:NM_181054:exon7:c.C780T:p.T260T	0.0103	8.427
12	15475691	12:15475691:G:T	G	T	0.00101937	2943	ADD	3.50733	0.933023	12.7675	0.000352696	exonic	PTPRO	.	nonsynonymous_SNV	PTPRO:NM_002848:exon1:c.G31T:p.A11S,PTPRO:NM_030667:exon1:c.G31T:p.A11S	0.0067	4.576
15	41146071	15:41146071:G:T	G	T	0.00016728	2989	ADD	6.09706	2.31241	12.7642	0.000353313	exonic	SPINT1	.	nonsynonymous_SNV	SPINT1:NM_001032367:exon4:c.G905T:p.G302V,SPINT1:NM_003710:exon5:c.G905T:p.G302V,SPINT1:NM_181642:exon5:c.G905T:p.G302V	8.959e-06	15.61
15	38800056	15:38800056:G:C	G	C	0.000167392	2987	ADD	6.09703	2.3124	12.7641	0.000353338	exonic	RASGRP1	.	nonsynonymous_SNV	RASGRP1:NM_001128602:exon9:c.C1113G:p.D371E,RASGRP1:NM_001306086:exon9:c.C1113G:p.D371E,RASGRP1:NM_005739:exon9:c.C1113G:p.D371E	0	24.5
15	44813598	15:44813598:A:G	A	G	0.000168011	2976	ADD	6.0968	2.31226	12.7629	0.000353557	exonic	CTDSPL2	.	synonymous_SNV	CTDSPL2:NM_016396:exon12:c.A1329G:p.V443V	0	11.77
15	41813050	15:41813050:G:A	G	A	0.000167954	2977	ADD	6.09674	2.31223	12.7628	0.000353582	exonic	RPAP1	.	nonsynonymous_SNV	RPAP1:NM_015540:exon22:c.C3334T:p.R1112W	0.0001	24.7
4	106155185	4:106155185:C:G	C	G	0.0126604	2962	ADD	1.68129	0.399471	12.7518	0.000355672	exonic	TET2	.	nonsynonymous_SNV	TET2:NM_001127208:exon3:c.C86G:p.P29R,TET2:NM_017628:exon3:c.C86G:p.P29R	0.2077	23.5
2	113308488	2:113308488:T:C	T	C	0.00016756	2984	ADD	6.09182	2.3119	12.7485	0.000356295	exonic	POLR1B	.	nonsynonymous_SNV	POLR1B:NM_001282776:exon2:c.T38C:p.M13T,POLR1B:NM_001137604:exon4:c.T503C:p.M168T,POLR1B:NM_001282774:exon5:c.T671C:p.M224T,POLR1B:NM_001282779:exon5:c.T254C:p.M85T,POLR1B:NM_019014:exon5:c.T671C:p.M224T,POLR1B:NM_001282772:exon6:c.T785C:p.M262T,POLR1B:NM_001282777:exon6:c.T254C:p.M85T	0	23.3
1	46120313	1:46120313:G:A	G	A	0.000502849	2983	ADD	4.11193	1.20605	12.7476	0.000356468	exonic	GPBP1L1	.	nonsynonymous_SNV	GPBP1L1:NM_021639:exon6:c.C379T:p.R127W	0.0003	24.2
20	58441564	20:58441564:T:G	T	G	0.000694686	2879	ADD	4.60348	1.13169	12.7288	0.000360073	exonic	SYCP2	.	nonsynonymous_SNV	SYCP2:NM_014258:exon40:c.A4206C:p.Q1402H	0.001	9.33
3	69126964	3:69126964:G:A	G	A	0.000167336	2988	ADD	6.08362	2.31133	12.727	0.000360413	exonic	UBA3	.	synonymous_SNV	UBA3:NM_001363861:exon2:c.C126T:p.F42F,UBA3:NM_198195:exon2:c.C126T:p.F42F,UBA3:NM_003968:exon3:c.C168T:p.F56F	2.993e-05	13.5
3	69928510	3:69928510:G:A	G	A	0.000167336	2988	ADD	6.08362	2.31133	12.727	0.000360413	exonic	MITF	.	synonymous_SNV	MITF:NM_001184967:exon2:c.G174A:p.T58T,MITF:NM_001354604:exon2:c.G330A:p.T110T,MITF:NM_001354605:exon2:c.G327A:p.T109T,MITF:NM_001354606:exon2:c.G327A:p.T109T,MITF:NM_006722:exon2:c.G327A:p.T109T,MITF:NM_198159:exon2:c.G330A:p.T110T,MITF:NM_198177:exon2:c.G282A:p.T94T,MITF:NM_001354607:exon3:c.G279A:p.T93T,MITF:NM_001354608:exon3:c.G174A:p.T58T	0.0598	10.65
3	153867202	3:153867202:A:T	A	T	0.000167616	2983	ADD	6.08351	2.31127	12.7265	0.000360504	exonic	ARHGEF26	.	nonsynonymous_SNV	ARHGEF26:NM_001251962:exon5:c.A1294T:p.T432S,ARHGEF26:NM_001251963:exon5:c.A1294T:p.T432S,ARHGEF26:NM_015595:exon5:c.A1294T:p.T432S	0	16.6
3	36778828	3:36778828:G:A	G	A	0.000167504	2985	ADD	6.08348	2.31125	12.7263	0.000360537	exonic	DCLK3	.	synonymous_SNV	DCLK3:NM_033403:exon2:c.C1323T:p.D441D	0.0009	0.824
19	50321826	19:50321826:A:G	A	G	0.000167336	2988	ADD	6.08396	2.31199	12.7252	0.00036077	splicing	MED25	NM_030973:exon2:c.135-2A>G	.	.	0	33
19	50031765	19:50031765:G:A	G	A	0.000167392	2987	ADD	6.08395	2.31198	12.7251	0.000360778	exonic	RCN3	.	synonymous_SNV	RCN3:NM_020650:exon2:c.G36A:p.L12L	2.299e-05	10.07
19	35613857	19:35613857:G:A	G	A	0.000167616	2983	ADD	6.08389	2.31195	12.7248	0.000360836	exonic	FXYD3	.	nonsynonymous_SNV	FXYD3:NM_001136008:exon6:c.G286A:p.G96R,FXYD3:NM_001136012:exon6:c.G286A:p.G96S,FXYD3:NM_005971:exon7:c.G208A:p.G70S,FXYD3:NM_021910:exon7:c.G286A:p.G96S,FXYD3:NM_001136011:exon8:c.G208A:p.G70S,FXYD3:NM_001136007:exon9:c.G379A:p.G127S	0.0004	11.61
3	45837872	3:45837872:A:G	A	G	0.000169033	2958	ADD	6.08301	2.31098	12.7241	0.000360977	exonic	SLC6A20	.	nonsynonymous_SNV	SLC6A20:NM_020208:exon1:c.T40C:p.F14L,SLC6A20:NM_022405:exon1:c.T40C:p.F14L	0	26.4
19	3785063	19:3785063:C:T	C	T	0.000168919	2960	ADD	6.08332	2.31161	12.7221	0.00036136	exonic	MATK	.	nonsynonymous_SNV	MATK:NM_139355:exon2:c.G71A:p.R24Q	1.794e-05	11.87
6	32634355	6:32634355:G:A	G	A	0.164987	2779	ADD	0.733046	0.186979	12.7218	0.000361418	exonic	HLA-DQB1	.	synonymous_SNV	HLA-DQB1:NM_001243961:exon1:c.C30T:p.P10P,HLA-DQB1:NM_002123:exon1:c.C30T:p.P10P	0.3725	3.449
8	56882331	8:56882331:G:A	G	A	0.000167336	2988	ADD	6.08144	2.31107	12.7217	0.000361435	exonic	LYN	.	synonymous_SNV	LYN:NM_001111097:exon10:c.G966A:p.K322K,LYN:NM_002350:exon10:c.G1029A:p.K343K	0.0001	12.13
8	95906321	8:95906321:GGCT:G	GGCT	G	0.000167392	2987	ADD	6.08143	2.31107	12.7217	0.000361435	exonic	CCNE2	.	nonframeshift_deletion	CCNE2:NM_057749:exon3:c.38_40del:p.Q13del	6.668e-05	20.5
8	22054288	8:22054288:C:G	C	G	0.000167392	2987	ADD	6.08143	2.31107	12.7217	0.000361443	exonic	BMP1	.	nonsynonymous_SNV	BMP1:NM_001199:exon14:c.C1861G:p.L621V,BMP1:NM_006129:exon14:c.C1861G:p.L621V	8.954e-06	16.04
8	143857329	8:143857329:G:C	G	C	0.000167392	2987	ADD	6.08138	2.31104	12.7214	0.000361493	exonic	LYNX1\x3bLYNX1-SLURP2	.	nonsynonymous_SNV	LYNX1:NM_001356370:exon2:c.C47G:p.P16R,LYNX1-SLURP2:NM_023946:exon2:c.C47G:p.P16R,LYNX1:NM_177457:exon2:c.C47G:p.P16R,LYNX1:NM_177476:exon2:c.C47G:p.P16R,LYNX1:NM_177477:exon2:c.C47G:p.P16R	0	25.1
8	145154487	8:145154487:C:T	C	T	0.000167504	2985	ADD	6.08132	2.31101	12.7212	0.000361543	exonic	SHARPIN	.	nonsynonymous_SNV	SHARPIN:NM_030974:exon5:c.G694A:p.A232T	0.0002	1.956
1	19423123	1:19423123:T:A	T	A	0.00016728	2989	ADD	6.08251	2.31248	12.7208	0.000361618	exonic	UBR4	.	nonsynonymous_SNV	UBR4:NM_020765:exon92:c.A13412T:p.E4471V	6.669e-05	32
1	32678172	1:32678172:T:C	T	C	0.00016728	2989	ADD	6.08251	2.31248	12.7208	0.000361618	exonic	DCDC2B	.	synonymous_SNV	DCDC2B:NM_001099434:exon5:c.T609C:p.D203D	0.0001	6.5
1	173772588	1:173772588:G:C	G	C	0.00016728	2989	ADD	6.08251	2.31248	12.7208	0.000361618	exonic	CENPL	.	nonsynonymous_SNV	CENPL:NM_001171182:exon4:c.C476G:p.T159S,CENPL:NM_033319:exon5:c.C476G:p.T159S,CENPL:NM_001127181:exon6:c.C614G:p.T205S	0	16.82
1	100487996	1:100487996:T:C	T	C	0.000167336	2988	ADD	6.0825	2.31248	12.7207	0.000361626	exonic	SLC35A3	.	synonymous_SNV	SLC35A3:NM_001271685:exon8:c.T1068C:p.Y356Y,SLC35A3:NM_012243:exon8:c.T942C:p.Y314Y	0	6.685
1	183933046	1:183933046:A:G	A	G	0.000167392	2987	ADD	6.0825	2.31247	12.7207	0.000361635	exonic	COLGALT2	.	nonsynonymous_SNV	COLGALT2:NM_001303420:exon6:c.T941C:p.I314T,COLGALT2:NM_001303421:exon6:c.T581C:p.I194T,COLGALT2:NM_015101:exon6:c.T941C:p.I314T	9.366e-05	20.3
15	59383287	15:59383287:C:T	C	T	0.000167336	2988	ADD	6.08107	2.31108	12.7207	0.000361635	exonic	RNF111	.	synonymous_SNV	RNF111:NM_001270528:exon12:c.C2700T:p.G900G,RNF111:NM_001270529:exon12:c.C2670T:p.G890G,RNF111:NM_001270530:exon12:c.C2673T:p.G891G,RNF111:NM_001330331:exon12:c.C2700T:p.G900G,RNF111:NM_017610:exon12:c.C2673T:p.G891G	8.984e-06	12.89
1	215813966	1:215813966:C:T	C	T	0.000167336	2988	ADD	6.08249	2.31247	12.7206	0.000361643	exonic	USH2A	.	nonsynonymous_SNV	USH2A:NM_206933:exon68:c.G14902A:p.D4968N	0.0004	24.2
1	237778063	1:237778063:G:A	G	A	0.000167392	2987	ADD	6.08248	2.31246	12.7206	0.000361651	exonic	RYR2	.	nonsynonymous_SNV	RYR2:NM_001035:exon37:c.G5635A:p.G1879S	0	1.724
1	46032608	1:46032608:T:G	T	G	0.000167392	2987	ADD	6.08246	2.31245	12.7205	0.000361668	exonic	AKR1A1	.	nonsynonymous_SNV	AKR1A1:NM_153326:exon4:c.T272G:p.V91G,AKR1A1:NM_001202413:exon5:c.T272G:p.V91G,AKR1A1:NM_006066:exon5:c.T272G:p.V91G,AKR1A1:NM_001202414:exon6:c.T272G:p.V91G	0.0001	29.6
1	1475090	1:1475090:G:A	G	A	0.00016756	2984	ADD	6.08239	2.31241	12.7202	0.000361726	exonic	TMEM240	.	synonymous_SNV	TMEM240:NM_001114748:exon2:c.C138T:p.D46D	0.0003	13.08
15	49329893	15:49329893:A:T	A	T	0.000168407	2969	ADD	6.08084	2.31095	12.7196	0.000361843	exonic	SECISBP2L	.	nonsynonymous_SNV	SECISBP2L:NM_001193489:exon2:c.T98A:p.M33K,SECISBP2L:NM_014701:exon2:c.T98A:p.M33K	0.0002	26.5
8	139255259	8:139255259:C:T	C	T	0.000168919	2960	ADD	6.08082	2.31071	12.7188	0.000362001	exonic	FAM135B	.	nonsynonymous_SNV	FAM135B:NM_001362965:exon7:c.G595A:p.G199R,FAM135B:NM_015912:exon7:c.G595A:p.G199R	0.0012	22.5
8	29194834	8:29194834:C:G	C	G	0.000170416	2934	ADD	6.08069	2.31063	12.7181	0.000362135	exonic	DUSP4	.	nonsynonymous_SNV	DUSP4:NM_001394:exon4:c.G894C:p.K298N,DUSP4:NM_057158:exon5:c.G621C:p.K207N	8.973e-06	23.6
1	20304895	1:20304895:A:T	A	T	0.000169262	2954	ADD	6.08195	2.31215	12.718	0.00036216	exonic	PLA2G2A	.	nonsynonymous_SNV	PLA2G2A:NM_001161728:exon3:c.T163A:p.S55T,PLA2G2A:NM_001161729:exon3:c.T163A:p.S55T,PLA2G2A:NM_000300:exon4:c.T163A:p.S55T,PLA2G2A:NM_001161727:exon4:c.T163A:p.S55T	5.959e-05	0.001
22	23237872	22:23237872:T:C	T	C	0.00016728	2989	ADD	6.07952	2.31135	12.7148	0.000362769	exonic	IGLL5	.	stoploss	IGLL5:NM_001256296:exon2:c.T418C:p.X140Q,IGLL5:NM_001178126:exon3:c.T643C:p.X215Q	0.0001	7.491
22	31486127	22:31486127:C:A	C	A	0.00016728	2989	ADD	6.07952	2.31135	12.7148	0.000362769	exonic	SMTN	.	nonsynonymous_SNV	SMTN:NM_001207018:exon7:c.C994A:p.Q332K,SMTN:NM_001207017:exon8:c.C988A:p.Q330K,SMTN:NM_006932:exon8:c.C826A:p.Q276K,SMTN:NM_134269:exon8:c.C826A:p.Q276K,SMTN:NM_134270:exon8:c.C826A:p.Q276K	5.42e-05	7.182
22	42610929	22:42610929:T:C	T	C	0.000167336	2988	ADD	6.07951	2.31134	12.7147	0.000362786	exonic	TCF20	.	nonsynonymous_SNV	TCF20:NM_181492:exon1:c.A383G:p.N128S,TCF20:NM_005650:exon2:c.A383G:p.N128S	0.0001	12.29
22	40815025	22:40815025:C:T	C	T	0.000167448	2986	ADD	6.0795	2.31134	12.7147	0.000362794	exonic	MRTFA	.	nonsynonymous_SNV	MRTFA:NM_001282660:exon9:c.G1417A:p.G473R,MRTFA:NM_001318139:exon10:c.G1522A:p.G508R,MRTFA:NM_001282661:exon11:c.G1567A:p.G523R,MRTFA:NM_001282662:exon12:c.G1717A:p.G573R,MRTFA:NM_020831:exon12:c.G1717A:p.G573R	0.0004	27.4
22	50688386	22:50688386:C:T	C	T	0.000167392	2987	ADD	6.0795	2.31134	12.7147	0.000362794	exonic	HDAC10	.	nonsynonymous_SNV	HDAC10:NM_001159286:exon5:c.G397A:p.G133R,HDAC10:NM_032019:exon5:c.G397A:p.G133R	0.001	25.6
23	31950233	X:31950233:T:C	T	C	0.000167504	2985	ADD	6.0794	2.31133	12.7144	0.000362861	exonic	DMD	.	synonymous_SNV	DMD:NM_004011:exon18:c.A2703G:p.K901K,DMD:NM_004012:exon18:c.A2694G:p.K898K,DMD:NM_000109:exon46:c.A6702G:p.K2234K,DMD:NM_004006:exon46:c.A6726G:p.K2242K,DMD:NM_004009:exon46:c.A6714G:p.K2238K,DMD:NM_004010:exon46:c.A6357G:p.K2119K	1.253e-05	NA
23	119500553	X:119500553:C:A	C	A	0.000168067	2975	ADD	6.07909	2.31115	12.713	0.000363128	exonic	ATP1B4	.	synonymous_SNV	ATP1B4:NM_001142447:exon2:c.C237A:p.G79G,ATP1B4:NM_012069:exon2:c.C237A:p.G79G	0.0002	NA
1	165667761	1:165667761:G:T	G	T	0.000172414	2900	ADD	6.08073	2.31144	12.7125	0.000363229	exonic	ALDH9A1	.	nonsynonymous_SNV	ALDH9A1:NM_000696:exon1:c.C35A:p.P12Q	0.0001	9.32
22	39262787	22:39262787:T:C	T	C	0.00016909	2957	ADD	6.07901	2.31105	12.7124	0.000363237	exonic	CBX6	.	synonymous_SNV	CBX6:NM_001303494:exon5:c.A612G:p.T204T,CBX6:NM_014292:exon5:c.A666G:p.T222T	2.988e-05	7.386
23	125955380	X:125955380:G:A	G	A	0.000172712	2895	ADD	6.07888	2.31102	12.7119	0.000363337	exonic	PRR32	.	synonymous_SNV	PRR32:NM_001122716:exon2:c.G759A:p.P253P	0	NA
19	36159368	19:36159368:T:G	T	G	0.101374	2984	ADD	-1.42625	0.442166	12.7053	0.00036462	exonic	UPK1A	.	nonsynonymous_SNV	UPK1A:NM_001281443:exon3:c.T97G:p.S33A,UPK1A:NM_007000:exon3:c.T97G:p.S33A	0.2174	17.99
8	22473396	8:22473396:C:T	C	T	0.000167336	2988	ADD	6.07505	2.31135	12.7015	0.000365368	exonic	CCAR2	.	nonsynonymous_SNV	CCAR2:NM_001363068:exon13:c.C1579T:p.R527W,CCAR2:NM_001363069:exon13:c.C1579T:p.R527W,CCAR2:NM_021174:exon13:c.C1579T:p.R527W	0	24.6
8	12879446	8:12879446:C:T	C	T	0.000167448	2986	ADD	6.07502	2.31133	12.7013	0.000365401	exonic	TRMT9B	.	nonsynonymous_SNV	TRMT9B:NM_001099677:exon2:c.C880T:p.L294F,TRMT9B:NM_020844:exon5:c.C1258T:p.L420F	9.086e-06	25.6
8	145138928	8:145138928:GATGTCA:G	GATGTCA	G	0.000167448	2986	ADD	6.07497	2.3113	12.7011	0.000365452	exonic	GPAA1	.	nonframeshift_deletion	GPAA1:NM_003801:exon5:c.602_607del:p.N203_V204del	0.0001	22.1
16	71411636	16:71411636:G:A	G	A	0.126599	2970	ADD	0.813997	0.206187	12.6939	0.000366843	exonic	CALB2	.	nonsynonymous_SNV	CALB2:NM_001740:exon4:c.G328A:p.A110T,CALB2:NM_007088:exon4:c.G328A:p.A110T	0.1965	18.56
2	219677022	2:219677022:C:T	C	T	0.000670466	2983	ADD	4.12824	1.09057	12.6865	0.000368307	exonic	CYP27A1	.	nonsynonymous_SNV	CYP27A1:NM_000784:exon3:c.C524T:p.T175M	0.0163	22.7
14	64690055	14:64690055:G:A	G	A	0.000334672	2988	ADD	5.67528	1.44606	12.6709	0.00037139	exonic	SYNE2	.	nonsynonymous_SNV	SYNE2:NM_182910:exon6:c.G905A:p.R302Q,SYNE2:NM_182913:exon8:c.G1283A:p.R428Q,SYNE2:NM_015180:exon112:c.G20270A:p.R6757Q,SYNE2:NM_182914:exon113:c.G20339A:p.R6780Q	0.0075	5.894
4	17660116	4:17660116:G:T	G	T	0.00133824	2989	ADD	2.99706	0.817654	12.6624	0.000373087	exonic	FAM184B	.	nonsynonymous_SNV	FAM184B:NM_015688:exon10:c.C1894A:p.Q632K	0.0464	14.23
13	50096220	13:50096220:C:A	C	A	0.000167504	2985	ADD	6.05785	2.31305	12.6483	0.000375898	exonic	PHF11\x3bSETDB2-PHF11	.	nonsynonymous_SNV	PHF11:NM_001040443:exon6:c.C547A:p.P183T,PHF11:NM_001040444:exon6:c.C430A:p.P144T,SETDB2-PHF11:NM_001320727:exon16:c.C2029A:p.P677T	0.0003	0.031
2	175289215	2:175289215:G:A	G	A	0.000502344	2986	ADD	4.84286	1.59388	12.6475	0.000376062	exonic	SCRN3	.	synonymous_SNV	SCRN3:NM_001193528:exon7:c.G909A:p.K303K,SCRN3:NM_024583:exon7:c.G930A:p.K310K	0.0002	10.93
13	53000135	13:53000135:C:T	C	T	0.000167336	2988	ADD	6.05702	2.31257	12.6446	0.000376652	exonic	VPS36	.	nonsynonymous_SNV	VPS36:NM_001282168:exon9:c.G679A:p.G227S,VPS36:NM_001282169:exon9:c.G532A:p.G178S,VPS36:NM_016075:exon9:c.G706A:p.G236S	9.746e-05	26
13	31232732	13:31232732:G:T	G	T	0.000167785	2980	ADD	6.05689	2.31249	12.644	0.000376782	exonic	USPL1	.	nonsynonymous_SNV	USPL1:NM_001321534:exon6:c.G1531T:p.A511S,USPL1:NM_001321533:exon7:c.G1531T:p.A511S,USPL1:NM_001321532:exon8:c.G1975T:p.A659S,USPL1:NM_005800:exon9:c.G2518T:p.A840S	0	1.461
22	50969647	22:50969647:C:G	C	G	0.034049	2981	ADD	1.24903	0.304522	12.6434	0.000376903	exonic	ODF3B	.	nonsynonymous_SNV	ODF3B:NM_001014440:exon4:c.G391C:p.G131R	0.106	24.5
23	9862417	X:9862417:T:A	T	A	0.00016728	2989	ADD	6.0546	2.31116	12.6417	0.000377225	exonic	SHROOM2	.	nonsynonymous_SNV	SHROOM2:NM_001649:exon4:c.T469A:p.S157T	3.854e-05	NA
23	118222489	X:118222489:G:T	G	T	0.000168862	2961	ADD	6.05401	2.31082	12.6391	0.000377772	exonic	KIAA1210	.	nonsynonymous_SNV	KIAA1210:NM_020721:exon11:c.C2704A:p.Q902K	0.0003	NA
13	101725990	13:101725990:T:C	T	C	0.000171999	2907	ADD	6.0558	2.31185	12.6387	0.000377833	exonic	NALCN	.	synonymous_SNV	NALCN:NM_001350750:exon36:c.A4056G:p.V1352V,NALCN:NM_001350751:exon36:c.A4056G:p.V1352V,NALCN:NM_001350749:exon37:c.A4143G:p.V1381V,NALCN:NM_052867:exon37:c.A4143G:p.V1381V,NALCN:NM_001350748:exon38:c.A4230G:p.V1410V	0	4.702
10	1175195	10:1175195:C:T	C	T	0.000167336	2988	ADD	6.05235	2.31116	12.6351	0.000378582	exonic	WDR37	.	nonsynonymous_SNV	WDR37:NM_014023:exon14:c.C1396T:p.H466Y	0.0001	23.3
10	69934389	10:69934389:G:A	G	A	0.000167785	2980	ADD	6.05205	2.31098	12.6337	0.000378852	exonic	MYPN	.	nonsynonymous_SNV	MYPN:NM_032578:exon11:c.G2540A:p.G847E,MYPN:NM_001256267:exon12:c.G2540A:p.G847E,MYPN:NM_001256268:exon15:c.G1658A:p.G553E	0.0004	29.2
10	102050243	10:102050243:G:A	G	A	0.000168067	2975	ADD	6.05196	2.31093	12.6332	0.000378948	exonic	PKD2L1	.	stopgain	PKD2L1:NM_001253837:exon13:c.C1900T:p.R634X,PKD2L1:NM_016112:exon13:c.C2041T:p.R681X	5.8e-05	35
9	5892552	9:5892552:G:C	G	C	0.000167898	2978	ADD	6.04707	2.31298	12.6161	0.000382446	splicing	MLANA	NM_005511:exon2:c.77+1G>C	.	.	0.0136	34
9	115337112	9:115337112:A:C	A	C	0.000167392	2987	ADD	6.04636	2.31257	12.6129	0.00038308	exonic	KIAA1958	.	nonsynonymous_SNV	KIAA1958:NM_001287036:exon2:c.A752C:p.K251T,KIAA1958:NM_001287038:exon2:c.A752C:p.K251T,KIAA1958:NM_133465:exon2:c.A752C:p.K251T	0	25.5
9	72067053	9:72067053:C:T	C	T	0.000167336	2988	ADD	6.04632	2.31255	12.6127	0.000383125	exonic	APBA1	.	synonymous_SNV	APBA1:NM_001163:exon9:c.G1953A:p.S651S	0.0001	11.56
9	14848715	9:14848715:G:A	G	A	0.000167448	2986	ADD	6.04626	2.31251	12.6125	0.000383186	exonic	FREM1	.	synonymous_SNV	FREM1:NM_001370060:exon7:c.C1236T:p.H412H,FREM1:NM_001370063:exon7:c.C1209T:p.H403H,FREM1:NM_001370065:exon7:c.C1209T:p.H403H,FREM1:NM_144966:exon8:c.C1209T:p.H403H	0	8.685
9	119802237	9:119802237:C:A	C	A	0.000509684	2943	ADD	4.72339	1.53754	12.6082	0.000384052	exonic	ASTN2	.	synonymous_SNV	ASTN2:NM_014010:exon5:c.G1131T:p.L377L,ASTN2:NM_001365068:exon6:c.G1284T:p.L428L,ASTN2:NM_001365069:exon6:c.G1284T:p.L428L	0.0001	12.58
23	153046975	X:153046975:T:C	T	C	0.00033456	2989	ADD	3.02146	1.15632	12.6025	0.000385221	exonic	SRPK3	.	nonsynonymous_SNV	SRPK3:NM_001170760:exon3:c.T206C:p.V69A,SRPK3:NM_001170761:exon3:c.T206C:p.V69A,SRPK3:NM_014370:exon3:c.T206C:p.V69A	0	NA
23	20060647	X:20060647:T:C	T	C	0.000334672	2988	ADD	3.02145	1.15632	12.6025	0.00038523	exonic	MAP7D2	.	nonsynonymous_SNV	MAP7D2:NM_001168466:exon6:c.A722G:p.K241R,MAP7D2:NM_001168467:exon7:c.A701G:p.K234R,MAP7D2:NM_152780:exon7:c.A857G:p.K286R,MAP7D2:NM_001168465:exon8:c.A980G:p.K327R	0.0005	NA
23	107301372	X:107301372:C:A	C	A	0.000335121	2984	ADD	3.0214	1.15629	12.602	0.000385345	exonic	VSIG1	.	synonymous_SNV	VSIG1:NM_001170553:exon2:c.C154A:p.R52R,VSIG1:NM_182607:exon2:c.C154A:p.R52R	9.46e-05	NA
23	153175763	X:153175763:G:A	G	A	0.000343053	2915	ADD	3.02085	1.15596	12.5968	0.000386411	exonic	ARHGAP4	.	nonsynonymous_SNV	ARHGAP4:NM_001666:exon17:c.C2018T:p.P673L,ARHGAP4:NM_001164741:exon18:c.C2138T:p.P713L	0.0003	NA
20	2597741	20:2597741:G:T	G	T	0.00016728	2989	ADD	6.03861	2.3112	12.594	0.000386981	exonic	TMC2	.	nonsynonymous_SNV	TMC2:NM_080751:exon16:c.G1964T:p.G655V	0.0002	24.4
20	33586947	20:33586947:C:T	C	T	0.00016728	2989	ADD	6.03861	2.3112	12.594	0.000386981	exonic	MYH7B	.	nonsynonymous_SNV	MYH7B:NM_020884:exon36:c.C4405T:p.R1469W	0.0002	29.8
20	33719495	20:33719495:A:G	A	G	0.00016728	2989	ADD	6.03861	2.3112	12.594	0.000386981	exonic	EDEM2\x3bMMP24-AS1-EDEM2	.	nonsynonymous_SNV	EDEM2:NM_001145025:exon6:c.T683C:p.V228A,EDEM2:NM_018217:exon7:c.T794C:p.V265A,MMP24-AS1-EDEM2:NM_001355008:exon11:c.T671C:p.V224A	0	24.3
20	37400240	20:37400240:C:T	C	T	0.00016728	2989	ADD	6.03861	2.3112	12.594	0.000386981	exonic	ACTR5	.	synonymous_SNV	ACTR5:NM_024855:exon9:c.C1605T:p.Y535Y	0.0006	6.462
20	60775920	20:60775920:T:C	T	C	0.00016728	2989	ADD	6.03861	2.3112	12.594	0.000386981	exonic	MTG2	.	synonymous_SNV	MTG2:NM_015666:exon7:c.T1008C:p.S336S	2.686e-05	0.093
20	62729681	20:62729681:G:A	G	A	0.00016728	2989	ADD	6.03861	2.3112	12.594	0.000386981	exonic	OPRL1	.	synonymous_SNV	OPRL1:NM_001318854:exon3:c.G627A:p.V209V,OPRL1:NM_001318855:exon3:c.G555A:p.V185V,OPRL1:NM_000913:exon4:c.G642A:p.V214V,OPRL1:NM_182647:exon5:c.G642A:p.V214V,OPRL1:NM_001200019:exon6:c.G642A:p.V214V	6.677e-05	6.217
20	2621899	20:2621899:C:T	C	T	0.000167392	2987	ADD	6.03859	2.31119	12.5939	0.000386999	exonic	TMC2	.	nonsynonymous_SNV	TMC2:NM_080751:exon20:c.C2623T:p.R875W	0.0002	22
20	10639303	20:10639303:C:T	C	T	0.000167336	2988	ADD	6.03859	2.3112	12.594	0.000386999	exonic	JAG1	.	synonymous_SNV	JAG1:NM_000214:exon4:c.G507A:p.T169T	8.961e-06	9.574
17	80861311	17:80861311:G:A	G	A	0.00016728	2989	ADD	6.03706	2.31118	12.5896	0.000387909	exonic	TBCD	.	synonymous_SNV	TBCD:NM_005993:exon19:c.G1761A:p.L587L	9.764e-06	1.348
17	42400916	17:42400916:G:A	G	A	0.000167392	2987	ADD	6.03704	2.31117	12.5895	0.000387918	exonic	SLC25A39	.	synonymous_SNV	SLC25A39:NM_001143780:exon2:c.C15T:p.D5D,SLC25A39:NM_001321240:exon2:c.C15T:p.D5D,SLC25A39:NM_001321241:exon2:c.C15T:p.D5D,SLC25A39:NM_016016:exon2:c.C15T:p.D5D	0.0001	2.334
17	42225318	17:42225318:A:G	A	G	0.000167448	2986	ADD	6.03702	2.31116	12.5894	0.000387945	exonic	C17orf53	.	synonymous_SNV	C17orf53:NM_001171251:exon3:c.A147G:p.P49P,C17orf53:NM_001321310:exon3:c.A147G:p.P49P,C17orf53:NM_001321311:exon3:c.A147G:p.P49P,C17orf53:NM_024032:exon3:c.A147G:p.P49P	6.539e-05	5.194
17	7350469	17:7350469:AG:A	AG	A	0.000167504	2985	ADD	6.03702	2.31115	12.5894	0.000387954	exonic	CHRNB1	.	frameshift_deletion	CHRNB1:NM_000747:exon5:c.462delG:p.V155Sfs*63	0	36
17	4586193	17:4586193:G:A	G	A	0.000167673	2982	ADD	6.037	2.31114	12.5893	0.000387972	exonic	PELP1	.	nonsynonymous_SNV	PELP1:NM_014389:exon4:c.C475T:p.L159F,PELP1:NM_001278241:exon5:c.C34T:p.L12F	0.0001	24.8
4	951982	4:951982:C:G	C	G	0.00297203	2860	ADD	2.39223	0.555652	12.5892	0.000387981	exonic	TMEM175	.	nonsynonymous_SNV	TMEM175:NM_001297424:exon9:c.C967G:p.L323V,TMEM175:NM_001297425:exon9:c.C967G:p.L323V,TMEM175:NM_001297428:exon9:c.C865G:p.L289V,TMEM175:NM_001297423:exon11:c.C967G:p.L323V,TMEM175:NM_001297427:exon11:c.C865G:p.L289V,TMEM175:NM_032326:exon11:c.C1213G:p.L405V,TMEM175:NM_001297426:exon12:c.C865G:p.L289V	0.0128	22.8
17	51900862	17:51900862:G:T	G	T	0.000167954	2977	ADD	6.03683	2.31104	12.5885	0.000388132	exonic	KIF2B	.	synonymous_SNV	KIF2B:NM_032559:exon1:c.G468T:p.L156L	0.0024	6.172
22	29454778	22:29454778:G:A	G	A	0.00819672	2989	ADD	1.96756	0.476786	12.5827	0.000389332	exonic	C22orf31	.	synonymous_SNV	C22orf31:NM_015370:exon3:c.C825T:p.H275H	0.1609	0.01
15	42041782	15:42041782:G:T	G	T	0.00186314	2952	ADD	3.0102	0.715889	12.5784	0.00039022	exonic	MGA	.	nonsynonymous_SNV	MGA:NM_001080541:exon16:c.G5350T:p.V1784F,MGA:NM_001164273:exon17:c.G5977T:p.V1993F	0.0043	12.73
1	247486528	1:247486528:C:T	C	T	0.0280231	2944	ADD	1.3259	0.324292	12.5777	0.000390382	exonic	ZNF496	.	synonymous_SNV	ZNF496:NM_001329733:exon6:c.G579A:p.L193L,ZNF496:NM_032752:exon6:c.G579A:p.L193L	0.0861	7.477
13	113181792	13:113181792:C:T	C	T	0.000167392	2987	ADD	6.02595	2.31121	12.5564	0.000394857	exonic	TUBGCP3	.	nonsynonymous_SNV	TUBGCP3:NM_001286277:exon12:c.G1312A:p.V438I,TUBGCP3:NM_001286278:exon12:c.G1342A:p.V448I,TUBGCP3:NM_006322:exon12:c.G1342A:p.V448I	0	20.5
13	36888472	13:36888472:G:A	G	A	0.000169664	2947	ADD	6.02525	2.3108	12.5531	0.000395549	exonic	SPART	.	nonsynonymous_SNV	SPART:NM_001142294:exon6:c.C1375T:p.R459W,SPART:NM_001142295:exon6:c.C1375T:p.R459W,SPART:NM_015087:exon6:c.C1375T:p.R459W,SPART:NM_001142296:exon7:c.C1375T:p.R459W	0.0001	31
14	51237130	14:51237130:C:A	C	A	0.000167336	2988	ADD	6.01871	2.3115	12.5335	0.000399733	exonic	NIN	.	synonymous_SNV	NIN:NM_016350:exon12:c.G1410T:p.R470R,NIN:NM_020921:exon12:c.G1410T:p.R470R,NIN:NM_182944:exon12:c.G1410T:p.R470R,NIN:NM_182946:exon12:c.G1410T:p.R470R	0	11.4
14	50085719	14:50085719:GCATA:G	GCATA	G	0.000167392	2987	ADD	6.0187	2.3115	12.5334	0.000399742	exonic	RPL36AL	.	frameshift_deletion	RPL36AL:NM_001001:exon2:c.100_103del:p.Y34Pfs*34	0	32
8	77761824	8:77761824:C:T	C	T	0.000502513	2985	ADD	4.23844	1.26043	12.5101	0.000404744	exonic	ZFHX4	.	nonsynonymous_SNV	ZFHX4:NM_024721:exon8:c.C3722T:p.S1241L	0.0033	28
7	95926250	7:95926250:T:C	T	C	0.00016728	2989	ADD	6.01181	2.31216	12.51	0.000404772	exonic	SLC25A13	.	nonsynonymous_SNV	SLC25A13:NM_001160210:exon2:c.A29G:p.K10R,SLC25A13:NM_014251:exon2:c.A29G:p.K10R	6.277e-05	21.8
7	82997340	7:82997340:G:T	G	T	0.000167448	2986	ADD	6.01172	2.31211	12.5097	0.000404855	exonic	SEMA3E	.	nonsynonymous_SNV	SEMA3E:NM_001178129:exon17:c.C1710A:p.D570E,SEMA3E:NM_012431:exon17:c.C1890A:p.D630E	0	14.43
7	83764222	7:83764222:T:C	T	C	0.000167448	2986	ADD	6.01173	2.31211	12.5097	0.000404855	exonic	SEMA3A	.	nonsynonymous_SNV	SEMA3A:NM_006080:exon2:c.A158G:p.N53S	0	21.1
7	151879382	7:151879382:G:C	G	C	0.000167785	2980	ADD	6.01153	2.31199	12.5087	0.00040507	exonic	KMT2C	.	nonsynonymous_SNV	KMT2C:NM_170606:exon36:c.C5563G:p.P1855A	0	22.6
7	4169705	7:4169705:A:G	A	G	0.00016835	2970	ADD	6.01143	2.31194	12.5083	0.000405154	exonic	SDK1	.	nonsynonymous_SNV	SDK1:NM_152744:exon27:c.A4105G:p.I1369V	9.099e-06	10.27
22	24039361	22:24039361:G:A	G	A	0.00016728	2989	ADD	6.0068	2.31127	12.4993	0.000407099	exonic	RGL4	.	nonsynonymous_SNV	RGL4:NM_001329425:exon3:c.G28A:p.V10M,RGL4:NM_001329424:exon8:c.G1165A:p.V389M,RGL4:NM_153615:exon8:c.G1165A:p.V389M	0	21.2
22	37966648	22:37966648:C:T	C	T	0.00016728	2989	ADD	6.0068	2.31127	12.4993	0.000407099	exonic	LGALS2	.	nonsynonymous_SNV	LGALS2:NM_006498:exon3:c.G184A:p.G62S	0.005	11.86
21	30547075	21:30547075:G:A	G	A	0.00016728	2989	ADD	6.00789	2.31277	12.498	0.00040738	exonic	MAP3K7CL	.	synonymous_SNV	MAP3K7CL:NM_001286624:exon4:c.G126A:p.K42K,MAP3K7CL:NM_001371376:exon4:c.G126A:p.K42K,MAP3K7CL:NM_001286620:exon5:c.G291A:p.K97K,MAP3K7CL:NM_001371371:exon5:c.G348A:p.K116K,MAP3K7CL:NM_001371372:exon5:c.G291A:p.K97K,MAP3K7CL:NM_001371370:exon6:c.G474A:p.K158K,MAP3K7CL:NM_001371373:exon6:c.G291A:p.K97K,MAP3K7CL:NM_001286619:exon7:c.G291A:p.K97K,MAP3K7CL:NM_001286634:exon8:c.G591A:p.K197K,MAP3K7CL:…	0	12.49
7	44098034	7:44098034:G:A	G	A	0.000167336	2988	ADD	6.00527	2.31053	12.4976	0.000407483	exonic	DBNL	.	synonymous_SNV	DBNL:NM_001284313:exon6:c.G399A:p.T133T,DBNL:NM_001284315:exon6:c.G426A:p.T142T,DBNL:NM_001014436:exon8:c.G708A:p.T236T,DBNL:NM_001122956:exon8:c.G711A:p.T237T,DBNL:NM_001362723:exon8:c.G708A:p.T236T,DBNL:NM_014063:exon8:c.G711A:p.T237T	0.0004	4.55
7	146741108	7:146741108:G:T	G	T	0.000167336	2988	ADD	6.00527	2.31053	12.4976	0.000407483	exonic	CNTNAP2	.	unknown	UNKNOWN	0.0001	21.8
7	14622749	7:14622749:G:A	G	A	0.000168691	2964	ADD	6.00483	2.31027	12.4955	0.000407934	exonic	DGKB	.	nonsynonymous_SNV	DGKB:NM_001350720:exon16:c.C1393T:p.R465C,DGKB:NM_001350721:exon16:c.C1393T:p.R465C,DGKB:NM_001350711:exon17:c.C1426T:p.R476C,DGKB:NM_001350712:exon17:c.C1426T:p.R476C,DGKB:NM_001350714:exon17:c.C1426T:p.R476C,DGKB:NM_001350715:exon17:c.C1429T:p.R477C,DGKB:NM_001350716:exon17:c.C1429T:p.R477C,DGKB:NM_001350717:exon17:c.C1414T:p.R472C,DGKB:NM_001350718:exon17:c.C1414T:p.R472C,DGKB:NM_001350719:exo…	0.0001	32
17	71410828	17:71410828:G:A	G	A	0.00016728	2989	ADD	6.00457	2.31279	12.4881	0.000409553	exonic	SDK2	.	synonymous_SNV	SDK2:NM_001144952:exon18:c.C2439T:p.N813N	0.0002	5.698
17	74720095	17:74720095:G:A	G	A	0.00016728	2989	ADD	6.00457	2.31279	12.4881	0.000409553	exonic	JMJD6	.	synonymous_SNV	JMJD6:NM_001081461:exon3:c.C564T:p.I188I,JMJD6:NM_015167:exon3:c.C564T:p.I188I	8.933e-05	12.2
17	80363200	17:80363200:C:T	C	T	0.00016728	2989	ADD	6.00457	2.31279	12.4881	0.000409553	exonic	OGFOD3	.	nonsynonymous_SNV	OGFOD3:NM_024648:exon6:c.G545A:p.R182Q,OGFOD3:NM_175902:exon6:c.G545A:p.R182Q	0.0012	34
17	8416897	17:8416897:C:G	C	G	0.000167392	2987	ADD	6.00456	2.31279	12.4881	0.000409562	exonic	MYH10	.	nonsynonymous_SNV	MYH10:NM_005964:exon21:c.G2611C:p.V871L,MYH10:NM_001256095:exon22:c.G2638C:p.V880L,MYH10:NM_001256012:exon23:c.G2704C:p.V902L	0.0002	22.4
17	2139914	17:2139914:G:A	G	A	0.000167504	2985	ADD	6.00454	2.31278	12.488	0.000409581	exonic	SMG6	.	nonsynonymous_SNV	SMG6:NM_001256828:exon2:c.C17T:p.A6V,SMG6:NM_001256827:exon3:c.C17T:p.A6V,SMG6:NM_017575:exon10:c.C2741T:p.A914V	0	23.1
17	7193729	17:7193729:C:T	C	T	0.000167616	2983	ADD	6.00451	2.31276	12.4878	0.000409609	exonic	YBX2	.	nonsynonymous_SNV	YBX2:NM_015982:exon5:c.G585A:p.M195I	6.451e-05	21.5
17	38176543	17:38176543:G:A	G	A	0.000167392	2987	ADD	6.0045	2.31275	12.4878	0.000409628	exonic	MED24	.	nonsynonymous_SNV	MED24:NM_001079518:exon23:c.C2648T:p.P883L,MED24:NM_001267797:exon23:c.C2648T:p.P883L,MED24:NM_014815:exon24:c.C2687T:p.P896L,MED24:NM_001330211:exon25:c.C2744T:p.P915L	0	32
17	38948704	17:38948704:T:C	T	C	0.000167504	2985	ADD	6.00445	2.31272	12.4875	0.000409676	exonic	KRT28	.	nonsynonymous_SNV	KRT28:NM_181535:exon8:c.A1370G:p.K457R	0.0001	22.7
17	62026764	17:62026764:C:A	C	A	0.000167898	2978	ADD	6.00445	2.31272	12.4875	0.000409685	exonic	SCN4A	.	nonsynonymous_SNV	SCN4A:NM_000334:exon15:c.G2978T:p.C993F	1.212e-05	28.6
17	9143215	17:9143215:G:T	G	T	0.000167898	2978	ADD	6.00439	2.31269	12.4873	0.000409732	exonic	NTN1	.	nonsynonymous_SNV	NTN1:NM_004822:exon7:c.G1745T:p.R582L	0.0002	29.7
9	35663069	9:35663069:C:T	C	T	0.00117529	2978	ADD	3.72488	0.854582	12.4859	0.000410034	exonic	ARHGEF39	.	nonsynonymous_SNV	ARHGEF39:NM_032818:exon6:c.G547A:p.A183T	0.0011	24.7
12	44124241	12:44124241:C:T	C	T	0.000841184	2972	ADD	3.80561	0.9302	12.4829	0.000410696	exonic	PUS7L	.	nonsynonymous_SNV	PUS7L:NM_001271826:exon8:c.G1105A:p.D369N,PUS7L:NM_001098614:exon9:c.G2044A:p.D682N,PUS7L:NM_001098615:exon9:c.G2044A:p.D682N,PUS7L:NM_031292:exon9:c.G2044A:p.D682N	0.0017	24
9	139366547	9:139366547:T:C	T	C	0.000334672	2988	ADD	5.54527	1.4184	12.4716	0.000413181	exonic	SEC16A	.	nonsynonymous_SNV	SEC16A:NM_001276418:exon3:c.A3584G:p.Y1195C,SEC16A:NM_014866:exon4:c.A3584G:p.Y1195C	0.0002	20.4
10	124273783	10:124273783:G:A	G	A	0.00016728	2989	ADD	5.99895	2.3128	12.4714	0.000413228	exonic	HTRA1	.	nonsynonymous_SNV	HTRA1:NM_002775:exon9:c.G1351A:p.V451I	0.0001	19.83
10	124457302	10:124457302:C:A	C	A	0.000167392	2987	ADD	5.99894	2.3128	12.4713	0.000413247	exonic	C10orf120	.	stopgain	C10orf120:NM_001010912:exon3:c.G955T:p.E319X	0	33
10	12858277	10:12858277:G:A	G	A	0.000167392	2987	ADD	5.99892	2.31278	12.4712	0.000413266	exonic	CAMK1D	.	synonymous_SNV	CAMK1D:NM_020397:exon8:c.G783A:p.E261E,CAMK1D:NM_153498:exon8:c.G783A:p.E261E,CAMK1D:NM_001351032:exon10:c.G492A:p.E164E	0	10.03
10	105037724	10:105037724:G:A	G	A	0.000167898	2978	ADD	5.99865	2.31263	12.4701	0.000413533	exonic	INA	.	synonymous_SNV	INA:NM_032727:exon1:c.G756A:p.V252V	0	14.99
20	52788190	20:52788190:G:T	G	T	0.0202409	2989	ADD	1.54462	0.372925	12.4641	0.000414849	exonic	CYP24A1	.	synonymous_SNV	CYP24A1:NM_000782:exon3:c.C469A:p.R157R,CYP24A1:NM_001128915:exon3:c.C469A:p.R157R	0.043	9.358
2	42280465	2:42280465:C:G	C	G	0.00016728	2989	ADD	5.99455	2.31129	12.4629	0.000415117	exonic	PKDCC	.	nonsynonymous_SNV	PKDCC:NM_138370:exon2:c.C726G:p.I242M	7.177e-05	25.1
2	109405315	2:109405315:G:A	G	A	0.000167392	2987	ADD	5.99454	2.31129	12.4628	0.000415126	exonic	CCDC138	.	synonymous_SNV	CCDC138:NM_001351545:exon2:c.G144A:p.L48L,CCDC138:NM_001351548:exon2:c.G33A:p.L11L,CCDC138:NM_001351557:exon2:c.G144A:p.L48L,CCDC138:NM_001351561:exon2:c.G144A:p.L48L,CCDC138:NM_001303105:exon3:c.G159A:p.L53L,CCDC138:NM_001351544:exon3:c.G177A:p.L59L,CCDC138:NM_001351549:exon3:c.G159A:p.L53L,CCDC138:NM_001351551:exon3:c.G159A:p.L53L,CCDC138:NM_001351553:exon3:c.G177A:p.L59L,CCDC138:NM_001351554:e…	3.582e-05	3.145
2	1652405	2:1652405:C:T	C	T	0.000167392	2987	ADD	5.99453	2.31128	12.4628	0.000415136	exonic	PXDN	.	synonymous_SNV	PXDN:NM_012293:exon17:c.G3147A:p.E1049E	0.0003	1.173
2	113513588	2:113513588:T:C	T	C	0.000167504	2985	ADD	5.99452	2.31128	12.4627	0.000415145	exonic	CKAP2L	.	nonsynonymous_SNV	CKAP2L:NM_001304361:exon4:c.A865G:p.N289D,CKAP2L:NM_152515:exon4:c.A1360G:p.N454D	0.0002	0.151
2	11774474	2:11774474:C:T	C	T	0.000167504	2985	ADD	5.99451	2.31127	12.4627	0.000415155	exonic	GREB1	.	nonsynonymous_SNV	GREB1:NM_014668:exon29:c.C5209T:p.R1737W	2.749e-05	33
2	155555860	2:155555860:C:A	C	A	0.00016756	2984	ADD	5.9945	2.31127	12.4627	0.000415164	exonic	KCNJ3	.	synonymous_SNV	KCNJ3:NM_001260508:exon1:c.C573A:p.A191A,KCNJ3:NM_001260509:exon1:c.C573A:p.A191A,KCNJ3:NM_001260510:exon1:c.C573A:p.A191A,KCNJ3:NM_002239:exon1:c.C573A:p.A191A	8.958e-05	11.2
2	179477169	2:179477169:G:T	G	T	0.00016756	2984	ADD	5.9945	2.31126	12.4626	0.000415174	exonic	TTN	.	synonymous_SNV	TTN:NM_003319:exon94:c.C22888A:p.R7630R,TTN:NM_133432:exon95:c.C23263A:p.R7755R,TTN:NM_133437:exon95:c.C23464A:p.R7822R,TTN:NM_133378:exon215:c.C42379A:p.R14127R,TTN:NM_001256850:exon216:c.C45160A:p.R15054R,TTN:NM_001267550:exon266:c.C50083A:p.R16695R	6.592e-05	4.23
2	20870284	2:20870284:C:T	C	T	0.000167504	2985	ADD	5.99447	2.31125	12.4625	0.000415193	exonic	GDF7	.	nonsynonymous_SNV	GDF7:NM_182828:exon2:c.C452T:p.A151V	0	14.02
2	179404248	2:179404248:G:C	G	C	0.000167954	2977	ADD	5.99442	2.31122	12.4623	0.00041525	exonic	TTN	.	synonymous_SNV	TTN:NM_003319:exon180:c.C71349G:p.S23783S,TTN:NM_133432:exon181:c.C71724G:p.S23908S,TTN:NM_133437:exon181:c.C71925G:p.S23975S,TTN:NM_133378:exon301:c.C90840G:p.S30280S,TTN:NM_001256850:exon302:c.C93621G:p.S31207S,TTN:NM_001267550:exon352:c.C98544G:p.S32848S	6.544e-05	12.62
2	230667161	2:230667161:C:T	C	T	0.00016756	2984	ADD	5.99439	2.3112	12.4622	0.000415279	exonic	TRIP12	.	nonsynonymous_SNV	TRIP12:NM_001284216:exon18:c.G1978A:p.V660I,TRIP12:NM_001284215:exon20:c.G2887A:p.V963I,TRIP12:NM_001348316:exon20:c.G2887A:p.V963I,TRIP12:NM_001348317:exon20:c.G2887A:p.V963I,TRIP12:NM_001348318:exon20:c.G2887A:p.V963I,TRIP12:NM_001348331:exon20:c.G2806A:p.V936I,TRIP12:NM_004238:exon20:c.G2788A:p.V930I,TRIP12:NM_001284214:exon21:c.G2932A:p.V978I,TRIP12:NM_001348315:exon21:c.G2932A:p.V978I,TRIP12…	6.542e-05	22.2
2	234669690	2:234669690:G:A	G	A	0.000167504	2985	ADD	5.99439	2.3112	12.4622	0.000415279	exonic	UGT1A1	.	nonsynonymous_SNV	UGT1A1:NM_000463:exon1:c.G757A:p.V253I	0	0.003
2	242438681	2:242438681:G:A	G	A	0.000167504	2985	ADD	5.99439	2.3112	12.4622	0.000415279	exonic	STK25	.	synonymous_SNV	STK25:NM_001271978:exon5:c.C576T:p.Y192Y,STK25:NM_001271979:exon5:c.C345T:p.Y115Y,STK25:NM_001271980:exon5:c.C345T:p.Y115Y,STK25:NM_001282305:exon5:c.C294T:p.Y98Y,STK25:NM_001282307:exon5:c.C294T:p.Y98Y,STK25:NM_001282308:exon5:c.C294T:p.Y98Y,STK25:NM_001271977:exon6:c.C576T:p.Y192Y,STK25:NM_001282306:exon6:c.C354T:p.Y118Y,STK25:NM_006374:exon6:c.C576T:p.Y192Y	9.746e-05	6.385
2	202672283	2:202672283:C:T	C	T	0.000168294	2971	ADD	5.9941	2.31104	12.4609	0.000415556	exonic	CDK15	.	nonsynonymous_SNV	CDK15:NM_001261435:exon2:c.C190T:p.R64C,CDK15:NM_001261436:exon2:c.C190T:p.R64C,CDK15:NM_001366386:exon2:c.C190T:p.R64C,CDK15:NM_139158:exon2:c.C37T:p.R13C	0.0009	10.49
2	168115801	2:168115801:G:A	G	A	0.000168805	2962	ADD	5.99412	2.31104	12.4609	0.000415566	exonic	XIRP2	.	synonymous_SNV	XIRP2:NM_001199145:exon8:c.G2079A:p.V693V,XIRP2:NM_001079810:exon10:c.G2745A:p.V915V,XIRP2:NM_001199143:exon11:c.G2844A:p.V948V	9.014e-06	11.78
10	74034732	10:74034732:A:T	A	T	0.000173491	2882	ADD	5.99656	2.31142	12.4605	0.000415643	exonic	DDIT4	.	nonsynonymous_SNV	DDIT4:NM_019058:exon3:c.A485T:p.Q162L	0	26.8
11	7673029	11:7673029:T:C	T	C	0.00217537	2988	ADD	2.9605	0.690062	12.46	0.000415757	exonic	PPFIBP2	.	nonsynonymous_SNV	PPFIBP2:NM_001256569:exon19:c.T1961C:p.M654T,PPFIBP2:NM_001256568:exon20:c.T2054C:p.M685T,PPFIBP2:NM_001351858:exon21:c.T2159C:p.M720T,PPFIBP2:NM_001351860:exon21:c.T2183C:p.M728T,PPFIBP2:NM_001351861:exon21:c.T2159C:p.M720T,PPFIBP2:NM_001351857:exon22:c.T2192C:p.M731T,PPFIBP2:NM_001351859:exon22:c.T2192C:p.M731T,PPFIBP2:NM_001351854:exon23:c.T2390C:p.M797T,PPFIBP2:NM_001351856:exon23:c.T2396C:p.…	0.2698	17.2
20	52789885	20:52789885:A:C	A	C	0.0202544	2987	ADD	1.54442	0.372971	12.4585	0.000416083	exonic	CYP24A1	.	synonymous_SNV	CYP24A1:NM_000782:exon1:c.T234G:p.G78G,CYP24A1:NM_001128915:exon1:c.T234G:p.G78G	0.043	11.34
6	31556989	6:31556989:G:A	G	A	0.000335458	2981	ADD	5.54928	1.42301	12.4511	0.000417734	exonic	NCR3	.	synonymous_SNV	NCR3:NM_001145466:exon4:c.C516T:p.S172S	7.602e-05	5.252
14	20927442	14:20927442:G:A	G	A	0.000167392	2987	ADD	5.97768	2.31132	12.4126	0.000426442	exonic	PIP4P1	.	nonsynonymous_SNV	PIP4P1:NM_001100814:exon6:c.C634T:p.R212C,PIP4P1:NM_144568:exon6:c.C613T:p.R205C	0.0006	25.3
14	64532172	14:64532172:C:T	C	T	0.000167729	2981	ADD	5.97761	2.31128	12.4123	0.000426521	exonic	SYNE2	.	nonsynonymous_SNV	SYNE2:NM_015180:exon51:c.C10235T:p.S3412L,SYNE2:NM_182914:exon51:c.C10235T:p.S3412L	0	14.57
14	24728950	14:24728950:C:T	C	T	0.000170242	2937	ADD	5.97684	2.31083	12.4088	0.000427327	exonic	TGM1	.	nonsynonymous_SNV	TGM1:NM_000359:exon6:c.G944A:p.R315H	0.0002	29.5
18	21125007	18:21125007:A:C	A	C	0.000167336	2988	ADD	5.9762	2.31133	12.4082	0.000427455	exonic	NPC1	.	nonsynonymous_SNV	NPC1:NM_000271:exon12:c.T1864G:p.F622V	0	13.65
18	21109190	18:21109190:G:T	G	T	0.000167504	2985	ADD	5.97614	2.31129	12.4079	0.000427524	exonic	RMC1	.	synonymous_SNV	RMC1:NM_001318707:exon12:c.G873T:p.P291P,RMC1:NM_001276342:exon13:c.G1200T:p.P400P,RMC1:NM_001318709:exon13:c.G1200T:p.P400P,RMC1:NM_001318708:exon14:c.G873T:p.P291P,RMC1:NM_013326:exon15:c.G1344T:p.P448P	0	1.539
18	3067526	18:3067526:C:T	C	T	0.000167392	2987	ADD	5.9761	2.31127	12.4077	0.000427563	exonic	MYOM1	.	nonsynonymous_SNV	MYOM1:NM_019856:exon37:c.G4504A:p.G1502R,MYOM1:NM_003803:exon38:c.G4792A:p.G1598R	0.0011	28.1
17	39135212	17:39135212:A:G	A	G	0.000167336	2988	ADD	5.97638	2.31159	12.4075	0.000427612	exonic	KRT40	.	nonsynonymous_SNV	KRT40:NM_182497:exon8:c.T1040C:p.I347T	0.0001	24
17	39724513	17:39724513:C:T	C	T	0.000167336	2988	ADD	5.97638	2.31159	12.4075	0.000427612	exonic	KRT9	.	nonsynonymous_SNV	KRT9:NM_000226:exon6:c.G1295A:p.C432Y	6.667e-05	19
17	56393387	17:56393387:C:G	C	G	0.00016728	2989	ADD	5.97638	2.31159	12.4075	0.000427612	exonic	TSPOAP1	.	nonsynonymous_SNV	TSPOAP1:NM_024418:exon15:c.G1915C:p.E639Q,TSPOAP1:NM_001261835:exon16:c.G2095C:p.E699Q,TSPOAP1:NM_004758:exon16:c.G2095C:p.E699Q	5.374e-05	28.7
17	67517195	17:67517195:A:G	A	G	0.000167336	2988	ADD	5.97638	2.31159	12.4075	0.000427612	exonic	MAP2K6	.	synonymous_SNV	MAP2K6:NM_001330450:exon7:c.A321G:p.V107V,MAP2K6:NM_002758:exon7:c.A489G:p.V163V	6.662e-05	11.59
17	71434216	17:71434216:C:T	C	T	0.00016728	2989	ADD	5.97638	2.31159	12.4075	0.000427612	exonic	SDK2	.	nonsynonymous_SNV	SDK2:NM_001144952:exon7:c.G803A:p.R268Q	0.0007	25.5
17	10419630	17:10419630:G:A	G	A	0.000167392	2987	ADD	5.97637	2.31159	12.4075	0.000427622	exonic	MYH1	.	synonymous_SNV	MYH1:NM_005963:exon4:c.C234T:p.F78F	0.0002	2.013
17	18154712	17:18154712:G:T	G	T	0.000167504	2985	ADD	5.97636	2.31158	12.4074	0.000427632	exonic	FLII	.	nonsynonymous_SNV	FLII:NM_001256265:exon12:c.C1298A:p.S433Y,FLII:NM_001256264:exon13:c.C1430A:p.S477Y,FLII:NM_002018:exon13:c.C1463A:p.S488Y	2.981e-05	27.4
17	4803248	17:4803248:G:A	G	A	0.000167616	2983	ADD	5.97631	2.31155	12.4072	0.000427691	exonic	C17orf107	.	synonymous_SNV	C17orf107:NM_001145536:exon2:c.G84A:p.P28P	1.742e-05	9.939
17	32963138	17:32963138:C:T	C	T	0.000167392	2987	ADD	5.97631	2.31155	12.4072	0.000427691	exonic	TMEM132E	.	nonsynonymous_SNV	TMEM132E:NM_001304438:exon8:c.C2090T:p.S697F	7.323e-05	24.9
17	34091633	17:34091633:C:T	C	T	0.000167504	2985	ADD	5.97629	2.31154	12.4071	0.000427711	exonic	C17orf50	.	nonsynonymous_SNV	C17orf50:NM_145272:exon3:c.C521T:p.S174F	0.0013	13.46
17	26851808	17:26851808:G:A	G	A	0.00016756	2984	ADD	5.97629	2.31154	12.407	0.00042772	exonic	FOXN1	.	synonymous_SNV	FOXN1:NM_003593:exon2:c.G411A:p.E137E,FOXN1:NM_001369369:exon3:c.G411A:p.E137E	2.981e-05	9.947
17	44806221	17:44806221:A:G	A	G	0.000170532	2932	ADD	5.975	2.31079	12.4012	0.000429072	exonic	NSF	.	nonsynonymous_SNV	NSF:NM_006178:exon17:c.A1829G:p.D610G	0	32
16	48162381	16:48162381:C:T	C	T	0.000167336	2988	ADD	5.97382	2.31189	12.3986	0.000429655	exonic	ABCC12	.	nonsynonymous_SNV	ABCC12:NM_033226:exon9:c.G1504A:p.V502M	6.66e-05	18.52
16	21730745	16:21730745:A:G	A	G	0.000167448	2986	ADD	5.9738	2.31188	12.3986	0.000429665	exonic	OTOA	.	nonsynonymous_SNV	OTOA:NM_170664:exon7:c.A754G:p.I252V,OTOA:NM_001161683:exon12:c.A1489G:p.I497V,OTOA:NM_144672:exon17:c.A1726G:p.I576V	0	22.3
17	41891677	17:41891677:C:T	C	T	0.000174642	2863	ADD	5.9743	2.31037	12.3977	0.000429853	exonic	MPP3	.	synonymous_SNV	MPP3:NM_001330233:exon15:c.G1137A:p.S379S,MPP3:NM_001932:exon15:c.G1062A:p.S354S,MPP3:NM_001353080:exon16:c.G1086A:p.S362S	0.0002	0.042
18	6894886	18:6894886:G:A	G	A	0.000168464	2968	ADD	5.97443	2.31263	12.3976	0.000429873	exonic	ARHGAP28	.	nonsynonymous_SNV	ARHGAP28:NM_001010000:exon14:c.G1424A:p.R475Q,ARHGAP28:NM_001366230:exon15:c.G1901A:p.R634Q,ARHGAP28:NM_001366231:exon15:c.G1901A:p.R634Q	0.0006	23.4
18	67697310	18:67697310:G:C	G	C	0.000168976	2959	ADD	5.97437	2.3126	12.3974	0.000429942	exonic	RTTN	.	nonsynonymous_SNV	RTTN:NM_001318520:exon41:c.C2947G:p.H983D,RTTN:NM_173630:exon42:c.C5683G:p.H1895D	8.976e-06	23.7
16	89357061	16:89357061:C:T	C	T	0.000169549	2949	ADD	5.9731	2.31147	12.3953	0.000430418	exonic	ANKRD11	.	synonymous_SNV	ANKRD11:NM_001256183:exon6:c.G573A:p.G191G,ANKRD11:NM_013275:exon6:c.G573A:p.G191G,ANKRD11:NM_001256182:exon7:c.G573A:p.G191G	9.747e-05	5.292
16	85696967	16:85696967:A:C	A	C	0.000170765	2928	ADD	5.97285	2.31132	12.394	0.000430705	exonic	GSE1	.	nonsynonymous_SNV	GSE1:NM_001134473:exon10:c.A2079C:p.Q693H,GSE1:NM_001278184:exon10:c.A2172C:p.Q724H,GSE1:NM_014615:exon11:c.A2391C:p.Q797H	0	24.5
21	38132034	21:38132034:G:A	G	A	0.000334784	2987	ADD	5.51052	1.4153	12.3909	0.00043142	exonic	HLCS	.	nonsynonymous_SNV	HLCS:NM_001352514:exon9:c.C2230T:p.L744F,HLCS:NM_001352515:exon9:c.C1789T:p.L597F,HLCS:NM_001352516:exon9:c.C1789T:p.L597F,HLCS:NM_001352517:exon9:c.C1789T:p.L597F,HLCS:NM_001352518:exon9:c.C1789T:p.L597F,HLCS:NM_000411:exon10:c.C1789T:p.L597F,HLCS:NM_001242784:exon10:c.C1789T:p.L597F,HLCS:NM_001242785:exon10:c.C1789T:p.L597F	0	27.7
5	145969657	5:145969657:C:A	C	A	0.00150602	2988	ADD	3.1798	0.806872	12.38	0.00043396	exonic	PPP2R2B	.	synonymous_SNV	PPP2R2B:NM_181676:exon9:c.G1194T:p.V398V,PPP2R2B:NM_001271899:exon10:c.G1203T:p.V401V,PPP2R2B:NM_001271948:exon10:c.G1152T:p.V384V,PPP2R2B:NM_181674:exon10:c.G1383T:p.V461V,PPP2R2B:NM_181675:exon10:c.G1503T:p.V501V,PPP2R2B:NM_001271900:exon11:c.G1359T:p.V453V,PPP2R2B:NM_181677:exon11:c.G1125T:p.V375V,PPP2R2B:NM_181678:exon11:c.G1152T:p.V384V	0.0066	9.447
6	7182155	6:7182155:G:A	G	A	0.000167448	2986	ADD	5.96455	2.31164	12.3721	0.000435793	exonic	RREB1	.	nonsynonymous_SNV	RREB1:NM_001003698:exon4:c.G11A:p.S4N,RREB1:NM_001003699:exon4:c.G11A:p.S4N,RREB1:NM_001003700:exon4:c.G11A:p.S4N,RREB1:NM_001168344:exon4:c.G11A:p.S4N	0.0099	14.96
6	7182231	6:7182231:G:A	G	A	0.000167616	2983	ADD	5.96451	2.31161	12.3719	0.000435843	exonic	RREB1	.	synonymous_SNV	RREB1:NM_001003698:exon4:c.G87A:p.K29K,RREB1:NM_001003699:exon4:c.G87A:p.K29K,RREB1:NM_001003700:exon4:c.G87A:p.K29K,RREB1:NM_001168344:exon4:c.G87A:p.K29K	0.0098	10.05
14	77272966	14:77272966:G:C	G	C	0.000335345	2982	ADD	5.5338	1.42853	12.3677	0.000436817	exonic	ANGEL1	.	synonymous_SNV	ANGEL1:NM_001370746:exon5:c.C1173G:p.T391T,ANGEL1:NM_001370747:exon5:c.C1173G:p.T391T,ANGEL1:NM_001370748:exon5:c.C1173G:p.T391T,ANGEL1:NM_015305:exon5:c.C1173G:p.T391T	0.0004	8.871
6	167717451	6:167717451:C:T	C	T	0.00016728	2989	ADD	5.96403	2.31293	12.3673	0.000436918	exonic	UNC93A	.	nonsynonymous_SNV	UNC93A:NM_001143947:exon4:c.C544T:p.P182S,UNC93A:NM_018974:exon5:c.C670T:p.P224S	0.001	2.68
6	31938891	6:31938891:C:T	C	T	0.000167392	2987	ADD	5.96402	2.31292	12.3672	0.000436928	exonic	DXO	.	synonymous_SNV	DXO:NM_005510:exon3:c.G390A:p.T130T	7.046e-05	5.161
6	30576693	6:30576693:T:TGCAG	T	TGCAG	0.000167448	2986	ADD	5.96399	2.3129	12.3671	0.000436958	splicing	PPP1R10	NM_002714:exon5:c.195-2->CTGC	.	.	0	15.45
6	42980947	6:42980947:T:C	T	C	0.000167504	2985	ADD	5.96399	2.3129	12.3671	0.000436958	exonic	MEA1	.	nonsynonymous_SNV	MEA1:NM_001318942:exon2:c.A170G:p.Y57C,MEA1:NM_001318943:exon2:c.A170G:p.Y57C,MEA1:NM_001363578:exon2:c.A218G:p.Y73C,MEA1:NM_014623:exon2:c.A209G:p.Y70C	0.0001	27.4
6	20781438	6:20781438:T:C	T	C	0.00016756	2984	ADD	5.96399	2.3129	12.3671	0.000436968	exonic	CDKAL1	.	synonymous_SNV	CDKAL1:NM_017774:exon8:c.T580C:p.L194L	0.0002	4.13
6	35836787	6:35836787:C:T	C	T	0.00016756	2984	ADD	5.96398	2.3129	12.3671	0.000436968	exonic	SRPK1	.	synonymous_SNV	SRPK1:NM_003137:exon12:c.G1512A:p.V504V	0	23.4
6	84371293	6:84371293:T:C	T	C	0.000167729	2981	ADD	5.96393	2.31287	12.3669	0.000437019	exonic	SNAP91	.	nonsynonymous_SNV	SNAP91:NM_001256718:exon4:c.A23G:p.Y8C,SNAP91:NM_001242792:exon5:c.A380G:p.Y127C,SNAP91:NM_001242793:exon5:c.A380G:p.Y127C,SNAP91:NM_001242794:exon5:c.A380G:p.Y127C,SNAP91:NM_001363677:exon5:c.A380G:p.Y127C,SNAP91:NM_014841:exon5:c.A380G:p.Y127C,SNAP91:NM_001256717:exon8:c.A275G:p.Y92C	1.815e-05	27.2
6	83848684	6:83848684:C:G	C	G	0.000170648	2930	ADD	5.96331	2.3125	12.3638	0.000437734	exonic	DOP1A	.	synonymous_SNV	DOP1A:NM_001199942:exon21:c.C4896G:p.L1632L,DOP1A:NM_015018:exon21:c.C4923G:p.L1641L	9.015e-06	5.5
14	53327064	14:53327064:A:C	A	C	0.00100435	2987	ADD	3.72393	0.87898	12.3483	0.000441377	exonic	FERMT2	.	nonsynonymous_SNV	FERMT2:NM_006832:exon13:c.T1722G:p.I574M,FERMT2:NM_001134999:exon14:c.T1743G:p.I581M,FERMT2:NM_001135000:exon14:c.T1743G:p.I581M	0.0013	19.71
10	87966234	10:87966234:C:T	C	T	0.000502176	2987	ADD	4.66248	1.34826	12.3355	0.000444416	exonic	GRID1	.	nonsynonymous_SNV	GRID1:NM_017551:exon3:c.G407A:p.G136D	0.0002	17.67
12	102190484	12:102190484:G:A	G	A	0.00033557	2980	ADD	4.62313	1.95252	12.3152	0.000449283	exonic	GNPTAB	.	synonymous_SNV	GNPTAB:NM_024312:exon2:c.C174T:p.D58D	0.03	11.86
10	101458588	10:101458588:TG:T	TG	T	0.000334672	2988	ADD	5.51936	1.43034	12.3118	0.000450091	exonic	ENTPD7	.	frameshift_deletion	ENTPD7:NM_001349963:exon10:c.1309delG:p.P438Qfs*18,ENTPD7:NM_020354:exon10:c.1309delG:p.P438Qfs*18,ENTPD7:NM_001349962:exon11:c.1315delG:p.P440Qfs*18	0.0037	32
3	100287704	3:100287704:A:G	A	G	0.00083696	2987	ADD	3.9164	0.995017	12.3069	0.000451284	exonic	TMEM45A	.	synonymous_SNV	TMEM45A:NM_018004:exon5:c.A627G:p.A209A,TMEM45A:NM_001363876:exon6:c.A675G:p.A225A	0.2541	3.154
3	59908114	3:59908114:C:G	C	G	0.000335458	2981	ADD	5.15194	2.10134	12.306	0.000451502	exonic	FHIT	.	nonsynonymous_SNV	FHIT:NM_001320901:exon6:c.G138C:p.R46S,FHIT:NM_001166243:exon8:c.G306C:p.R102S,FHIT:NM_001320899:exon8:c.G306C:p.R102S,FHIT:NM_002012:exon8:c.G306C:p.R102S,FHIT:NM_001320900:exon9:c.G306C:p.R102S	0.0001	24.5
19	23928085	19:23928085:C:T	C	T	0.000344828	2900	ADD	5.57316	1.45788	12.281	0.000457604	exonic	ZNF681	.	synonymous_SNV	ZNF681:NM_138286:exon4:c.G267A:p.Q89Q	9.591e-06	0.717
17	79518204	17:79518204:T:C	T	C	0.0008364	2989	ADD	3.83068	0.963297	12.2804	0.000457731	exonic	FAAP100	.	nonsynonymous_SNV	FAAP100:NM_025161:exon3:c.A316G:p.S106G	0.197	7.274
11	55111365	11:55111365:A:G	A	G	0.000335683	2979	ADD	4.61339	1.94163	12.2785	0.000458216	exonic	OR4A16	.	nonsynonymous_SNV	OR4A16:NM_001005274:exon1:c.A689G:p.E230G	0.0658	2.789
11	55111382	11:55111382:C:T	C	T	0.00033557	2980	ADD	4.61011	1.93951	12.2663	0.000461201	exonic	OR4A16	.	nonsynonymous_SNV	OR4A16:NM_001005274:exon1:c.C706T:p.P236S	0.0598	8.926
2	39053075	2:39053075:T:C	T	C	0.000502344	2986	ADD	4.13837	1.26164	12.2523	0.000464676	exonic	DHX57	.	synonymous_SNV	DHX57:NM_001329963:exon16:c.A2622G:p.L874L,DHX57:NM_198963:exon16:c.A2928G:p.L976L	0.0005	10.21
22	22869221	22:22869221:GC:G	GC	G	0.00033456	2989	ADD	4.71718	1.9932	12.2523	0.000464676	exonic	ZNF280A	.	frameshift_deletion	ZNF280A:NM_080740:exon2:c.733delG:p.A245Qfs*8	0.0066	21.2
6	35050593	6:35050593:T:C	T	C	0.00469641	2981	ADD	2.17353	0.51998	12.241	0.00046752	exonic	ANKS1A	.	synonymous_SNV	ANKS1A:NM_015245:exon18:c.T2835C:p.N945N	0.0225	10.8
1	150532586	1:150532586:C:A	C	A	0.00033456	2989	ADD	5.47242	1.4243	12.2146	0.000474166	exonic	ADAMTSL4	.	synonymous_SNV	ADAMTSL4:NM_019032:exon19:c.C3139A:p.R1047R,ADAMTSL4:NM_001288607:exon20:c.C3022A:p.R1008R,ADAMTSL4:NM_001288608:exon20:c.C3208A:p.R1070R	0.0486	14.02
11	59603364	11:59603364:G:A	G	A	0.000669568	2987	ADD	3.9024	1.05401	12.2135	0.000474439	exonic	CBLIF	.	synonymous_SNV	CBLIF:NM_005142:exon7:c.C990T:p.N330N	0.1194	0.801
11	58170780	11:58170780:T:A	T	A	0.00236646	2958	ADD	2.95372	0.68992	12.192	0.000479943	exonic	OR5B3	.	nonsynonymous_SNV	OR5B3:NM_001005469:exon1:c.A103T:p.I35F	0.1592	13.11
4	71508067	4:71508067:A:G	A	G	0.000335121	2984	ADD	5.49075	1.43559	12.1908	0.000480253	exonic	ENAM	.	synonymous_SNV	ENAM:NM_001368133:exon2:c.A270G:p.P90P,ENAM:NM_031889:exon9:c.A924G:p.P308P	0.0002	0.315
3	190167534	3:190167534:G:A	G	A	0.000680272	2940	ADD	3.95273	1.05793	12.1762	0.000484027	exonic	TMEM207	.	nonsynonymous_SNV	TMEM207:NM_207316:exon1:c.C65T:p.P22L	0.0052	1.142
14	23313690	14:23313690:G:A	G	A	0.000334672	2988	ADD	4.57521	1.93365	12.1672	0.000486362	exonic	MMP14	.	synonymous_SNV	MMP14:NM_004995:exon7:c.G1122A:p.R374R	0.0027	12.56
14	91701364	14:91701364:T:A	T	A	0.000334672	2988	ADD	5.45689	1.42532	12.1615	0.000487877	exonic	GPR68	.	nonsynonymous_SNV	GPR68:NM_001177676:exon2:c.A31T:p.M11L,GPR68:NM_003485:exon2:c.A31T:p.M11L,GPR68:NM_001348437:exon3:c.A31T:p.M11L	0.0002	0.008
4	40762452	4:40762452:T:C	T	C	0.000335796	2978	ADD	5.8034	1.59724	12.1135	0.000500587	exonic	NSUN7	.	synonymous_SNV	NSUN7:NM_001330648:exon3:c.T300C:p.Y100Y,NSUN7:NM_024677:exon3:c.T300C:p.Y100Y	0.0006	14.25
1	205892736	1:205892736:T:C	T	C	0.00083668	2988	ADD	4.25053	1.0525	12.0798	0.000509718	exonic	SLC26A9	.	nonsynonymous_SNV	SLC26A9:NM_052934:exon14:c.A1502G:p.N501S,SLC26A9:NM_134325:exon14:c.A1502G:p.N501S	0.0015	23.3
19	39423118	19:39423118:G:A	G	A	0.000337268	2965	ADD	5.46059	1.44023	12.0693	0.000512578	exonic	MRPS12	.	synonymous_SNV	MRPS12:NM_021107:exon2:c.G195A:p.T65T,MRPS12:NM_033362:exon3:c.G195A:p.T65T,MRPS12:NM_033363:exon3:c.G195A:p.T65T	0.0005	2.249
1	206652427	1:206652427:C:G	C	G	0.00117332	2983	ADD	3.6427	0.852752	12.0621	0.000514565	exonic	IKBKE	.	synonymous_SNV	IKBKE:NM_001193321:exon9:c.C879G:p.P293P,IKBKE:NM_001193322:exon10:c.C1134G:p.P378P,IKBKE:NM_014002:exon10:c.C1134G:p.P378P	0.043	8.175
5	75923307	5:75923307:A:G	A	G	0.999665	2988	ADD	-5.44028	1.43298	12.0593	0.000515347	exonic	IQGAP2	.	nonsynonymous_SNV	IQGAP2:NM_001285461:exon3:c.A253G:p.K85E,IQGAP2:NM_001285462:exon3:c.A253G:p.K85E,IQGAP2:NM_001285460:exon13:c.A1444G:p.K482E,IQGAP2:NM_006633:exon14:c.A1594G:p.K532E	1	0.921
5	78602230	5:78602230:C:G	C	G	0.000669344	2988	ADD	3.93395	1.07318	12.0421	0.000520128	exonic	JMY	.	nonsynonymous_SNV	JMY:NM_152405:exon7:c.C1914G:p.I638M	0.001	22.1
22	22890642	22:22890642:C:A	C	A	0.000505391	2968	ADD	5.22352	1.39273	12.0015	0.000531582	exonic	PRAME	.	nonsynonymous_SNV	PRAME:NM_001291719:exon4:c.G1329T:p.R443S,PRAME:NM_001318126:exon4:c.G1329T:p.R443S,PRAME:NM_001318127:exon4:c.G1329T:p.R443S,PRAME:NM_001291715:exon5:c.G1377T:p.R459S,PRAME:NM_001291716:exon5:c.G1377T:p.R459S,PRAME:NM_001291717:exon5:c.G1329T:p.R443S,PRAME:NM_206953:exon5:c.G1377T:p.R459S,PRAME:NM_006115:exon6:c.G1377T:p.R459S,PRAME:NM_206954:exon6:c.G1377T:p.R459S,PRAME:NM_206955:exon6:c.G1377T…	0.0006	15.94
10	3162237	10:3162237:G:A	G	A	0.000337382	2964	ADD	5.43282	1.44308	11.9653	0.000542001	splicing	PFKP	NM_001323069:exon16:c.1176+1G>A\x3bNM_002627:exon16:c.1683+1G>A\x3bNM_001323071:exon17:c.1569+1G>A\x3bNM_001323067:exon16:c.1602+1G>A\x3bNM_001323072:exon17:c.1569+1G>A\x3bNM_001242339:exon18:c.1659+1G>A\x3bNM_001345944:exon16:c.1569+1G>A\x3bNM_001323074:exon11:c.1035+1G>A\x3bNM_001323073:exon12:c.1035+1G>A	.	.	0.0002	32
15	77067392	15:77067392:G:A	G	A	0.000502008	2988	ADD	3.99874	1.22288	11.9607	0.00054335	exonic	SCAPER	.	nonsynonymous_SNV	SCAPER:NM_001145923:exon9:c.C101T:p.A34V,SCAPER:NM_020843:exon9:c.C839T:p.A280V,SCAPER:NM_001353009:exon10:c.C839T:p.A280V,SCAPER:NM_001353010:exon10:c.C437T:p.A146V,SCAPER:NM_001353011:exon10:c.C437T:p.A146V,SCAPER:NM_001353012:exon10:c.C437T:p.A146V	0.0008	20.7
3	119331874	3:119331874:C:T	C	T	0.160751	2958	ADD	-1.01433	0.308132	11.9594	0.000543713	exonic	PLA1A	.	synonymous_SNV	PLA1A:NM_001206961:exon4:c.C54T:p.P18P,PLA1A:NM_001206960:exon5:c.C525T:p.P175P,PLA1A:NM_001293225:exon5:c.C525T:p.P175P,PLA1A:NM_015900:exon5:c.C573T:p.P191P	0.467	3.214
1	156884486	1:156884486:C:A	C	A	0.00100402	2988	ADD	3.651	0.893079	11.9526	0.000545695	exonic	PEAR1	.	nonsynonymous_SNV	PEAR1:NM_001080471:exon23:c.C3010A:p.P1004T,PEAR1:NM_001353682:exon23:c.C2818A:p.P940T,PEAR1:NM_001353683:exon24:c.C2818A:p.P940T	0.0012	21.3
12	119909959	12:119909959:AC:A	AC	A	0.000502513	2985	ADD	3.94197	1.20604	11.9524	0.000545758	exonic	CCDC60	.	frameshift_deletion	CCDC60:NM_178499:exon3:c.332delC:p.L112Yfs*2	0.0018	21.3
23	114540964	X:114540964:G:A	G	A	0.00133914	2987	ADD	3.69556	0.874781	11.9393	0.000549617	exonic	LUZP4	.	synonymous_SNV	LUZP4:NM_001318840:exon3:c.G291A:p.Q97Q,LUZP4:NM_016383:exon4:c.G537A:p.Q179Q	0.0021	NA
5	76129521	5:76129521:T:C	T	C	0.0023427	2988	ADD	2.84238	0.665568	11.9271	0.000553235	exonic	F2RL1	.	synonymous_SNV	F2RL1:NM_005242:exon2:c.T1089C:p.S363S	0.0019	0.435
7	150269510	7:150269510:C:T	C	T	0.00117174	2987	ADD	3.70081	0.886693	11.9031	0.000560402	exonic	GIMAP4	.	nonsynonymous_SNV	GIMAP4:NM_001363532:exon3:c.C394T:p.L132F,GIMAP4:NM_018326:exon3:c.C352T:p.L118F	0.0012	16
19	46341824	19:46341824:C:T	C	T	0.146743	2978	ADD	0.750681	0.199295	11.8874	0.000565145	exonic	SYMPK	.	synonymous_SNV	SYMPK:NM_004819:exon10:c.G1137A:p.P379P	0.2278	0.719
2	96859034	2:96859034:A:G	A	G	0.140154	2986	ADD	-1.02766	0.312988	11.8847	0.000565979	exonic	STARD7	.	synonymous_SNV	STARD7:NM_020151:exon4:c.T606C:p.I202I	0.2291	11.33
15	51829875	15:51829875:G:C	G	C	0.000502849	2983	ADD	4.14996	1.276	11.8767	0.000568395	exonic	DMXL2	.	nonsynonymous_SNV	DMXL2:NM_001174116:exon11:c.C1427G:p.T476S,DMXL2:NM_001174117:exon11:c.C1427G:p.T476S,DMXL2:NM_015263:exon11:c.C1427G:p.T476S	0.0003	12.14
8	30407063	8:30407063:C:T	C	T	0.000334672	2988	ADD	5.45857	2.19371	11.8666	0.000571505	exonic	RBPMS	.	nonsynonymous_SNV	RBPMS:NM_001008711:exon7:c.C575T:p.P192L	0.0001	0.441
1	86591355	1:86591355:A:G	A	G	0.000503187	2981	ADD	4.05924	1.25816	11.8527	0.000575785	exonic	COL24A1	.	synonymous_SNV	COL24A1:NM_152890:exon3:c.T664C:p.L222L	0.0712	10.15
2	189872637	2:189872637:C:T	C	T	0.000335008	2985	ADD	5.36504	1.43564	11.8218	0.000585423	exonic	COL3A1	.	synonymous_SNV	COL3A1:NM_000090:exon46:c.C3390T:p.I1130I	8.062e-05	0.793
8	144356971	8:144356971:C:T	C	T	0.00217975	2982	ADD	2.86572	0.693715	11.8162	0.000587178	exonic	GLI4	.	synonymous_SNV	GLI4:NM_138465:exon3:c.C222T:p.P74P	0.0112	2.29
9	135932235	9:135932235:G:A	G	A	0.000338181	2957	ADD	5.3075	1.41525	11.7842	0.000597352	exonic	GTF3C5	.	nonsynonymous_SNV	GTF3C5:NM_001286709:exon8:c.G811A:p.D271N,GTF3C5:NM_012087:exon10:c.G1333A:p.D445N,GTF3C5:NM_001122823:exon11:c.G1354A:p.D452N	0.0066	18.31
20	34061202	20:34061202:C:T	C	T	0.00033456	2989	ADD	5.29969	1.4161	11.7586	0.000605634	exonic	CEP250	.	synonymous_SNV	CEP250:NM_007186:exon13:c.C1213T:p.L405L	0.0004	11.66
22	32788248	22:32788248:T:A	T	A	0.00033456	2989	ADD	5.28352	1.41618	11.7098	0.000621699	exonic	RTCB	.	synonymous_SNV	RTCB:NM_014306:exon11:c.A1389T:p.S463S	0.1202	8.61
22	32795626	22:32795626:T:C	T	C	0.00033456	2989	ADD	5.28352	1.41618	11.7098	0.000621699	exonic	RTCB	.	synonymous_SNV	RTCB:NM_014306:exon6:c.A618G:p.K206K	0.1203	8.483
22	32802680	22:32802680:A:G	A	G	0.00033456	2989	ADD	5.28352	1.41618	11.7098	0.000621699	exonic	RTCB	.	synonymous_SNV	RTCB:NM_014306:exon4:c.T309C:p.D103D	0.1203	10.25
3	19575381	3:19575381:G:A	G	A	0.00469641	2981	ADD	2.37298	0.567655	11.7093	0.000621899	exonic	KCNH8	.	synonymous_SNV	KCNH8:NM_144633:exon16:c.G3114A:p.S1038S	0.0073	0.313
9	117026652	9:117026652:C:T	C	T	0.000345781	2892	ADD	5.32315	1.43253	11.7074	0.000622515	exonic	COL27A1	.	synonymous_SNV	COL27A1:NM_032888:exon29:c.C3213T:p.D1071D	2.027e-05	7.547
1	12785200	1:12785200:T:C	T	C	0.00100368	2989	ADD	3.6636	0.912136	11.7032	0.000623936	exonic	AADACL3	.	unknown	UNKNOWN	0.0031	7.517
15	63991179	15:63991179:T:C	T	C	0.0003367	2970	ADD	5.32536	1.43556	11.6994	0.000625187	exonic	HERC1	.	synonymous_SNV	HERC1:NM_003922:exon26:c.A4653G:p.Q1551Q	8.941e-05	6.476
1	110172440	1:110172440:G:C	G	C	0.00033456	2989	ADD	5.26852	1.41504	11.6733	0.000634016	exonic	AMPD2	.	nonsynonymous_SNV	AMPD2:NM_001308170:exon14:c.G1822C:p.V608L,AMPD2:NM_001257361:exon15:c.G1693C:p.V565L,AMPD2:NM_004037:exon15:c.G1885C:p.V629L,AMPD2:NM_139156:exon15:c.G1804C:p.V602L,AMPD2:NM_001368809:exon16:c.G1885C:p.V629L	8.174e-05	22.3
6	102483426	6:102483426:G:A	G	A	0.000335233	2983	ADD	5.36229	1.45878	11.6555	0.000640118	exonic	GRIK2	.	nonsynonymous_SNV	GRIK2:NM_001166247:exon14:c.G2296A:p.V766I,GRIK2:NM_021956:exon14:c.G2296A:p.V766I,GRIK2:NM_175768:exon14:c.G2296A:p.V766I	0.0222	21.6
4	130030718	4:130030718:G:A	G	A	0.000334896	2986	ADD	5.25838	1.41616	11.6351	0.000647202	exonic	C4orf33	.	nonsynonymous_SNV	C4orf33:NM_001099783:exon5:c.G385A:p.V129M,C4orf33:NM_173487:exon5:c.G385A:p.V129M	0.0011	25.3
19	308813	19:308813:G:A	G	A	0.00101729	2949	ADD	3.81126	0.948028	11.6267	0.000650115	exonic	MIER2	.	nonsynonymous_SNV	MIER2:NM_001346105:exon10:c.C989T:p.P330L,MIER2:NM_017550:exon11:c.C1097T:p.P366L	0.0046	23.3
13	48947553	13:48947553:C:T	C	T	0.000336022	2976	ADD	5.26015	1.41842	11.6243	0.000650969	exonic	RB1	.	synonymous_SNV	RB1:NM_000321:exon12:c.C1140T:p.N380N	0.0004	9.605
1	228403357	1:228403357:C:T	C	T	0.000334672	2988	ADD	5.25049	1.41536	11.6173	0.000653416	exonic	OBSCN	.	nonsynonymous_SNV	OBSCN:NM_001098623:exon6:c.C1922T:p.A641V,OBSCN:NM_001271223:exon6:c.C1922T:p.A641V,OBSCN:NM_052843:exon6:c.C1922T:p.A641V	0.0002	3.828
19	47424954	19:47424954:G:A	G	A	0.000335008	2985	ADD	5.26187	1.425	11.5842	0.000665151	exonic	ARHGAP35	.	nonsynonymous_SNV	ARHGAP35:NM_004491:exon2:c.G3022A:p.D1008N	0.0002	23
10	81697818	10:81697818:A:G	A	G	0.117164	2983	ADD	-1.17958	0.375937	11.5597	0.000673954	exonic	SFTPD	.	synonymous_SNV	SFTPD:NM_003019:exon8:c.T918C:p.A306A	0.2943	0.237
10	18266967	10:18266967:A:T	A	T	0.000674764	2964	ADD	3.9884	1.14944	11.548	0.000678235	exonic	SLC39A12	.	nonsynonymous_SNV	SLC39A12:NM_001282734:exon4:c.A486T:p.E162D,SLC39A12:NM_001145195:exon5:c.A888T:p.E296D,SLC39A12:NM_001282733:exon5:c.A888T:p.E296D,SLC39A12:NM_152725:exon5:c.A888T:p.E296D	0.0064	1.036
7	12419108	7:12419108:A:T	A	T	0.716385	2960	ADD	-0.596726	0.165156	11.5393	0.000681412	exonic	VWDE	.	nonsynonymous_SNV	VWDE:NM_001135924:exon6:c.T874A:p.F292I,VWDE:NM_001346972:exon6:c.T874A:p.F292I,VWDE:NM_001346973:exon6:c.T409A:p.F137I	0.7776	18.87
18	34398883	18:34398883:G:A	G	A	0.0041862	2986	ADD	2.41371	0.588221	11.5277	0.000685662	exonic	TPGS2	.	nonsynonymous_SNV	TPGS2:NM_001271949:exon2:c.C139T:p.R47C,TPGS2:NM_001271950:exon2:c.C139T:p.R47C,TPGS2:NM_001271951:exon2:c.C139T:p.R47C,TPGS2:NM_001271953:exon2:c.C139T:p.R47C,TPGS2:NM_001271954:exon2:c.C139T:p.R47C,TPGS2:NM_001271955:exon2:c.C139T:p.R47C,TPGS2:NM_001271956:exon2:c.C139T:p.R47C,TPGS2:NM_001330572:exon2:c.C139T:p.R47C,TPGS2:NM_015476:exon2:c.C139T:p.R47C	0.1574	27.4
16	11219944	16:11219944:G:A	G	A	0.000335008	2985	ADD	5.21939	1.41525	11.5257	0.000686404	exonic	CLEC16A	.	nonsynonymous_SNV	CLEC16A:NM_001243403:exon21:c.G2528A:p.R843Q,CLEC16A:NM_015226:exon21:c.G2582A:p.R861Q	0.0003	28.4
13	111299567	13:111299567:G:A	G	A	0.000334672	2988	ADD	5.25129	1.43016	11.5183	0.00068916	exonic	CARS2	.	synonymous_SNV	CARS2:NM_024537:exon11:c.C1074T:p.S358S,CARS2:NM_001352252:exon12:c.C288T:p.S96S	0.0008	0.458
6	35260700	6:35260700:G:A	G	A	0.00502513	2985	ADD	2.07677	0.512512	11.5151	0.000690335	exonic	ZNF76	.	nonsynonymous_SNV	ZNF76:NM_001292032:exon11:c.G1208A:p.R403Q,ZNF76:NM_003427:exon11:c.G1208A:p.R403Q	0.0496	11.5
2	233407648	2:233407648:G:T	G	T	0.000335008	2985	ADD	5.23082	1.42287	11.5062	0.000693633	exonic	CHRNG	.	nonsynonymous_SNV	CHRNG:NM_005199:exon7:c.G661T:p.A221S	0.0001	9.533
19	39230735	19:39230735:G:A	G	A	0.00117568	2977	ADD	3.57286	0.895607	11.4942	0.00069812	exonic	CAPN12	.	nonsynonymous_SNV	CAPN12:NM_144691:exon5:c.C685T:p.R229C	0.003	27.2
1	32126672	1:32126672:C:T	C	T	0.000502176	2987	ADD	4.31984	1.32591	11.4918	0.000699053	exonic	COL16A1	.	nonsynonymous_SNV	COL16A1:NM_001856:exon61:c.G3820A:p.A1274T	0.0753	18.68
1	151262977	1:151262977:C:T	C	T	0.000334672	2988	ADD	5.20716	1.41536	11.4883	0.000700358	exonic	ZNF687	.	synonymous_SNV	ZNF687:NM_001304764:exon8:c.C3147T:p.H1049H,ZNF687:NM_020832:exon8:c.C3147T:p.H1049H,ZNF687:NM_001304763:exon9:c.C3147T:p.H1049H	0.0093	1.033
23	49032606	X:49032606:G:A	G	A	0.000339674	2944	ADD	5.61413	1.60773	11.4879	0.000700503	exonic	PRICKLE3	.	nonsynonymous_SNV	PRICKLE3:NM_001307979:exon9:c.C1060T:p.P354S,PRICKLE3:NM_006150:exon9:c.C1264T:p.P422S	0.0002	NA
1	118581916	1:118581916:C:T	C	T	0.00118926	2943	ADD	3.56001	0.857535	11.4754	0.000705212	exonic	SPAG17	.	synonymous_SNV	SPAG17:NM_206996:exon23:c.G3318A:p.T1106T	0.0011	0.139
11	63883985	11:63883985:T:C	T	C	0.866767	2976	ADD	-0.738052	0.198249	11.4747	0.000705521	exonic	FLRT1	.	synonymous_SNV	FLRT1:NM_013280:exon2:c.T246C:p.D82D	0.869	2.523
19	46352122	19:46352122:A:G	A	G	0.147522	2986	ADD	0.737636	0.19986	11.4682	0.000707962	exonic	SYMPK	.	synonymous_SNV	SYMPK:NM_004819:exon6:c.T312C:p.I104I	0.2255	10.86
14	88407813	14:88407813:A:G	A	G	0.000509684	2943	ADD	5.17452	1.47316	11.4462	0.000716407	exonic	GALC	.	nonsynonymous_SNV	GALC:NM_001201401:exon14:c.T1691C:p.I564T,GALC:NM_000153:exon15:c.T1760C:p.I587T,GALC:NM_001201402:exon15:c.T1682C:p.I561T	4.497e-05	15.37
15	78398230	15:78398230:C:T	C	T	0.0349849	2987	ADD	1.12045	0.295859	11.4436	0.000717398	exonic	CIB2	.	synonymous_SNV	CIB2:NM_001271889:exon3:c.G246A:p.T82T,CIB2:NM_001271888:exon4:c.G264A:p.T88T,CIB2:NM_001301224:exon4:c.G408A:p.T136T,CIB2:NM_006383:exon5:c.G393A:p.T131T	0.1626	10.25
2	242148764	2:242148764:T:A	T	A	0.0020202	2970	ADD	2.70472	0.707831	11.4377	0.000719698	exonic	ANO7	.	nonsynonymous_SNV	ANO7:NM_001370694:exon12:c.T1142A:p.V381E	0.3176	22.3
10	103826577	10:103826577:C:G	C	G	0.000334784	2987	ADD	5.38623	1.50407	11.4357	0.00072046	exonic	HPS6	.	nonsynonymous_SNV	HPS6:NM_024747:exon1:c.C1346G:p.S449C	0.0005	24.7
22	32795611	22:32795611:C:T	C	T	0.000334784	2987	ADD	5.18944	1.41602	11.4319	0.000721938	exonic	RTCB	.	synonymous_SNV	RTCB:NM_014306:exon6:c.G633A:p.A211A	6.539e-05	8.634
9	139649914	9:139649914:C:T	C	T	0.000334672	2988	ADD	5.23312	1.43557	11.4283	0.000723353	exonic	LCN8	.	nonsynonymous_SNV	LCN8:NM_001345934:exon4:c.G350A:p.R117Q,LCN8:NM_178469:exon4:c.G281A:p.R94Q	0.0004	22.7
14	103805565	14:103805565:A:G	A	G	0.000334672	2988	ADD	5.28879	1.4609	11.4252	0.000724536	exonic	EIF5	.	synonymous_SNV	EIF5:NM_183004:exon8:c.A801G:p.A267A,EIF5:NM_001969:exon9:c.A801G:p.A267A	0.0099	12.53
6	168465737	6:168465737:G:A	G	A	0.00157839	2851	ADD	3.46264	0.81507	11.4249	0.00072467	exonic	FRMD1	.	synonymous_SNV	FRMD1:NM_001122841:exon5:c.C258T:p.S86S,FRMD1:NM_024919:exon5:c.C462T:p.S154S	0.0013	23.4
11	122805430	11:122805430:A:G	A	G	0.000669344	2988	ADD	3.66888	1.02729	11.4022	0.00073355	exonic	JHY	.	synonymous_SNV	JHY:NM_001363088:exon4:c.A1167G:p.S389S,JHY:NM_001363087:exon5:c.A1281G:p.S427S,JHY:NM_001363089:exon5:c.A1281G:p.S427S,JHY:NM_024806:exon5:c.A1281G:p.S427S	0.0808	0.832
11	122805606	11:122805606:A:G	A	G	0.000670017	2985	ADD	3.66878	1.02729	11.4013	0.000733922	exonic	JHY	.	nonsynonymous_SNV	JHY:NM_001363088:exon4:c.A1343G:p.H448R,JHY:NM_001363087:exon5:c.A1457G:p.H486R,JHY:NM_001363089:exon5:c.A1457G:p.H486R,JHY:NM_024806:exon5:c.A1457G:p.H486R	0.0807	4.587
20	45194928	20:45194928:G:A	G	A	0.00033456	2989	ADD	5.17503	1.41463	11.3986	0.000735005	exonic	SLC13A3	.	synonymous_SNV	SLC13A3:NM_001193339:exon10:c.C1284T:p.F428F,SLC13A3:NM_001193340:exon11:c.C1188T:p.F396F,SLC13A3:NM_001193342:exon11:c.C1140T:p.F380F,SLC13A3:NM_022829:exon11:c.C1434T:p.F478F,SLC13A3:NM_001011554:exon12:c.C1293T:p.F431F	0	12.21
10	115526177	10:115526177:A:G	A	G	0.411506	2955	ADD	0.5735	0.162677	11.3952	0.000736343	exonic	PLEKHS1	.	synonymous_SNV	PLEKHS1:NM_182601:exon2:c.A18G:p.Q6Q,PLEKHS1:NM_024889:exon3:c.A36G:p.Q12Q	0.5158	4.916
16	70542353	16:70542353:C:T	C	T	0.00267827	2987	ADD	2.73164	0.655255	11.3931	0.000737157	exonic	COG4	.	synonymous_SNV	COG4:NM_001195139:exon8:c.G1005A:p.Q335Q,COG4:NM_015386:exon8:c.G1017A:p.Q339Q,COG4:NM_001365426:exon9:c.G591A:p.Q197Q	0.0048	12.29
12	50481258	12:50481258:T:C	T	C	0.000334672	2988	ADD	5.30164	1.47199	11.3894	0.000738652	exonic	SMARCD1	.	nonsynonymous_SNV	SMARCD1:NM_003076:exon5:c.T644C:p.L215P,SMARCD1:NM_139071:exon5:c.T644C:p.L215P	6.661e-05	29.9
4	184367322	4:184367322:C:G	C	G	0.00033456	2989	ADD	5.17165	1.41494	11.3864	0.000739844	exonic	CDKN2AIP	.	nonsynonymous_SNV	CDKN2AIP:NM_017632:exon3:c.C485G:p.S162C	0.0023	22.8
2	152541356	2:152541356:T:G	T	G	0.000502681	2984	ADD	4.3371	1.31349	11.3861	0.000739946	exonic	NEB	.	nonsynonymous_SNV	NEB:NM_001164507:exon28:c.A2771C:p.Y924S,NEB:NM_001164508:exon28:c.A2771C:p.Y924S,NEB:NM_001271208:exon28:c.A2771C:p.Y924S,NEB:NM_004543:exon28:c.A2771C:p.Y924S	0.0007	24.4
7	154774971	7:154774971:G:A	G	A	0.000335121	2984	ADD	5.20622	1.43075	11.3816	0.000741754	exonic	PAXIP1	.	synonymous_SNV	PAXIP1:NM_007349:exon5:c.C396T:p.L132L	6.662e-05	7.892
4	77065379	4:77065379:G:T	G	T	0.00033456	2989	ADD	5.15765	1.41539	11.3416	0.000757897	exonic	NUP54	.	nonsynonymous_SNV	NUP54:NM_017426:exon3:c.C218A:p.T73N	0.0002	22.2
1	3440744	1:3440744:T:C	T	C	0.00033456	2989	ADD	5.52872	1.59134	11.3353	0.000760484	exonic	MEGF6	.	nonsynonymous_SNV	MEGF6:NM_001409:exon5:c.A548G:p.Y183C	0.0004	24
8	48874638	8:48874638:T:C	T	C	0.000334672	2988	ADD	5.16939	1.42213	11.3295	0.000762834	exonic	MCM4	.	synonymous_SNV	MCM4:NM_005914:exon3:c.T261C:p.S87S,MCM4:NM_182746:exon4:c.T261C:p.S87S	8.954e-06	12.51
9	37777620	9:37777620:C:A	C	A	0.00251088	2987	ADD	2.71975	0.65917	11.294	0.000777589	exonic	TRMT10B	.	stopgain	TRMT10B:NM_001286951:exon8:c.C582A:p.Y194X,TRMT10B:NM_144964:exon9:c.C867A:p.Y289X	0.0089	36
14	24642395	14:24642395:T:C	T	C	0.00133869	2988	ADD	3.4339	0.820691	11.2893	0.000779525	exonic	REC8	.	nonsynonymous_SNV	REC8:NM_001048205:exon4:c.T329C:p.M110T,REC8:NM_005132:exon5:c.T329C:p.M110T	0.0012	23.4
23	153694535	X:153694535:G:C	G	C	0.00189917	2896	ADD	2.28184	0.600378	11.2678	0.000788624	exonic	PLXNA3	.	synonymous_SNV	PLXNA3:NM_017514:exon15:c.G2721C:p.P907P	0.0013	NA
16	81173193	16:81173193:C:T	C	T	0.695608	2983	ADD	0.677588	0.201943	11.2674	0.000788824	exonic	PKD1L2	.	unknown	UNKNOWN	0.6829	28.6
17	78163589	17:78163589:C:T	C	T	0.000336587	2971	ADD	5.15562	1.42628	11.2602	0.000791863	exonic	CARD14	.	nonsynonymous_SNV	CARD14:NM_052819:exon3:c.C170T:p.A57V,CARD14:NM_001257970:exon6:c.C881T:p.A294V,CARD14:NM_024110:exon6:c.C881T:p.A294V,CARD14:NM_001366385:exon9:c.C881T:p.A294V	0.0006	24.5
12	123806183	12:123806183:T:C	T	C	0.00033456	2989	ADD	5.12605	1.41475	11.2539	0.000794566	exonic	SBNO1	.	nonsynonymous_SNV	SBNO1:NM_001167856:exon17:c.A2222G:p.D741G,SBNO1:NM_018183:exon17:c.A2219G:p.D740G	0.0003	23
17	40826407	17:40826407:C:G	C	G	0.0010057	2983	ADD	3.75934	1.0151	11.2336	0.000803304	exonic	PLEKHH3	.	synonymous_SNV	PLEKHH3:NM_024927:exon2:c.G183C:p.L61L	0.0036	10.33
1	110466535	1:110466535:C:T	C	T	0.000334896	2986	ADD	5.19361	1.44727	11.2328	0.000803619	exonic	CSF1	.	nonsynonymous_SNV	CSF1:NM_000757:exon6:c.C1292T:p.S431L,CSF1:NM_172212:exon6:c.C1292T:p.S431L	0.0007	14.73
1	180886186	1:180886186:G:A	G	A	0.00251004	2988	ADD	2.72114	0.663007	11.2322	0.000803915	exonic	KIAA1614	.	nonsynonymous_SNV	KIAA1614:NM_020950:exon2:c.G947A:p.R316H	0.0019	4.371
4	155489611	4:155489611:A:G	A	G	0.000505221	2969	ADD	5.01087	1.20665	11.224	0.000807458	exonic	FGB	.	nonsynonymous_SNV	FGB:NM_001184741:exon5:c.A620G:p.Y207C,FGB:NM_005141:exon5:c.A797G:p.Y266C	0.0008	23.4
7	92130846	7:92130846:A:G	A	G	0.000334896	2986	ADD	5.32193	1.50815	11.2199	0.000809264	exonic	PEX1	.	nonsynonymous_SNV	PEX1:NM_001282677:exon14:c.T2387C:p.M796T,PEX1:NM_000466:exon15:c.T2558C:p.M853T,PEX1:NM_001282678:exon15:c.T1934C:p.M645T	0.0003	16.65
7	150648798	7:150648798:C:T	C	T	0.000502008	2988	ADD	4.53801	1.38386	11.2154	0.000811185	exonic	KCNH2	.	synonymous_SNV	KCNH2:NM_001204798:exon3:c.G663A:p.A221A,KCNH2:NM_172057:exon3:c.G663A:p.A221A,KCNH2:NM_000238:exon7:c.G1683A:p.A561A,KCNH2:NM_172056:exon7:c.G1683A:p.A561A	0.0004	10.12
6	32634299	6:32634299:A:ACC	A	ACC	0.167431	2834	ADD	0.695739	0.190415	11.2152	0.000811316	exonic	HLA-DQB1	.	frameshift_insertion	HLA-DQB1:NM_001243961:exon1:c.85_86insGG:p.L29Rfs*32,HLA-DQB1:NM_002123:exon1:c.85_86insGG:p.L29Rfs*32	0.3691	18.19
4	169196609	4:169196609:C:T	C	T	0.004182	2989	ADD	2.28245	0.560501	11.2022	0.000817015	exonic	DDX60	.	nonsynonymous_SNV	DDX60:NM_017631:exon16:c.G2191A:p.V731I	0.0137	0.146
5	148407038	5:148407038:G:A	G	A	0.000334784	2987	ADD	5.36652	1.53197	11.2018	0.000817165	exonic	SH3TC2	.	nonsynonymous_SNV	SH3TC2:NM_024577:exon11:c.C2257T:p.R753W	9.746e-05	2.35
2	33482567	2:33482567:C:T	C	T	0.000335683	2979	ADD	5.129	1.4246	11.1931	0.000821032	exonic	LTBP1	.	nonsynonymous_SNV	LTBP1:NM_000627:exon8:c.C1406T:p.A469V,LTBP1:NM_001166264:exon8:c.C1406T:p.A469V,LTBP1:NM_001166265:exon8:c.C1247T:p.A416V,LTBP1:NM_001166266:exon8:c.C1247T:p.A416V,LTBP1:NM_206943:exon12:c.C2384T:p.A795V	0.0004	22.2
22	45914571	22:45914571:A:G	A	G	0.00033456	2989	ADD	5.23425	1.47174	11.1907	0.000822072	exonic	FBLN1	.	nonsynonymous_SNV	FBLN1:NM_001996:exon2:c.A89G:p.D30G,FBLN1:NM_006485:exon2:c.A89G:p.D30G,FBLN1:NM_006486:exon2:c.A89G:p.D30G,FBLN1:NM_006487:exon2:c.A89G:p.D30G	0.0002	23.2
2	27460980	2:27460980:C:A	C	A	0.000334672	2988	ADD	5.55983	1.63213	11.1903	0.000822243	exonic	CAD	.	synonymous_SNV	CAD:NM_001306079:exon29:c.C4596A:p.T1532T,CAD:NM_004341:exon30:c.C4785A:p.T1595T	9.855e-05	0.086
1	240601456	1:240601456:G:C	G	C	0.000334896	2986	ADD	5.60168	2.1481	11.1857	0.000824309	exonic	FMN2	.	nonsynonymous_SNV	FMN2:NM_001348094:exon13:c.G2834C:p.S945T,FMN2:NM_020066:exon16:c.G5006C:p.S1669T,FMN2:NM_001305424:exon17:c.G5018C:p.S1673T	1.793e-05	22.3
6	32629755	6:32629755:G:A	G	A	0.176461	2927	ADD	0.693471	0.191037	11.1801	0.00082678	exonic	HLA-DQB1	.	nonsynonymous_SNV	HLA-DQB1:NM_001243961:exon3:c.C650T:p.T217I,HLA-DQB1:NM_002123:exon3:c.C650T:p.T217I	0.3945	15.82
17	78092476	17:78092476:C:T	C	T	0.000334672	2988	ADD	5.10405	1.41667	11.1747	0.00082922	exonic	GAA	.	nonsynonymous_SNV	GAA:NM_000152:exon19:c.C2671T:p.R891C,GAA:NM_001079804:exon19:c.C2671T:p.R891C,GAA:NM_001079803:exon20:c.C2671T:p.R891C	0.0002	23.5
23	103294668	X:103294668:G:A	G	A	0.00217537	2988	ADD	2.45684	0.684677	11.1703	0.000831189	exonic	H2BFM	.	nonsynonymous_SNV	H2BFM:NM_001164416:exon1:c.G125A:p.R42Q	0.0188	NA
23	103499116	X:103499116:C:T	C	T	0.0021761	2987	ADD	2.45683	0.684677	11.1702	0.000831209	exonic	ESX1	.	synonymous_SNV	ESX1:NM_153448:exon2:c.G225A:p.E75E	0.0042	NA
2	152528910	2:152528910:C:G	C	G	0.00318151	2986	ADD	2.65525	0.632249	11.1673	0.000832511	exonic	NEB	.	synonymous_SNV	NEB:NM_001164507:exon37:c.G4272C:p.T1424T,NEB:NM_001164508:exon37:c.G4272C:p.T1424T,NEB:NM_001271208:exon37:c.G4272C:p.T1424T,NEB:NM_004543:exon37:c.G4272C:p.T1424T	0.0035	0.049
1	16258756	1:16258756:T:A	T	A	0.00736032	2989	ADD	1.96014	0.481008	11.1616	0.000835064	exonic	SPEN	.	nonsynonymous_SNV	SPEN:NM_015001:exon11:c.T6021A:p.D2007E	0.0075	12.04
5	140792906	5:140792906:A:G	A	G	0.000334672	2988	ADD	5.14129	1.43549	11.1568	0.000837221	exonic	PCDHGA10	.	nonsynonymous_SNV	PCDHGA10:NM_018913:exon1:c.A164G:p.D55G,PCDHGA10:NM_032090:exon1:c.A164G:p.D55G	0.0001	23.8
7	92116799	7:92116799:C:T	C	T	0.000351494	2845	ADD	5.25805	1.48671	11.1542	0.000838436	exonic	PEX1	.	nonsynonymous_SNV	PEX1:NM_001282677:exon23:c.G3653A:p.R1218Q,PEX1:NM_000466:exon24:c.G3824A:p.R1275Q,PEX1:NM_001282678:exon24:c.G3200A:p.R1067Q	6.56e-05	27.3
1	22190686	1:22190686:C:T	C	T	0.000502344	2986	ADD	4.95969	1.19941	11.1329	0.000848106	exonic	HSPG2	.	synonymous_SNV	HSPG2:NM_001291860:exon37:c.G4650A:p.T1550T,HSPG2:NM_005529:exon37:c.G4647A:p.T1549T	0.0009	0.506
12	7636051	12:7636051:C:T	C	T	0.00033456	2989	ADD	5.16247	1.44878	11.1305	0.0008492	exonic	CD163	.	synonymous_SNV	CD163:NM_001370145:exon12:c.G3000A:p.G1000G,CD163:NM_001370146:exon12:c.G3000A:p.G1000G,CD163:NM_004244:exon12:c.G3000A:p.G1000G,CD163:NM_203416:exon12:c.G3000A:p.G1000G	0.0005	5.356
9	37777619	9:37777619:A:T	A	T	0.00267827	2987	ADD	2.68363	0.652733	11.1181	0.00085487	exonic	TRMT10B	.	nonsynonymous_SNV	TRMT10B:NM_001286951:exon8:c.A581T:p.Y194F,TRMT10B:NM_144964:exon9:c.A866T:p.Y289F	0.0089	19.37
19	59022144	19:59022144:C:T	C	T	0.000334672	2988	ADD	5.10711	1.42754	11.1096	0.000858816	exonic	SLC27A5	.	nonsynonymous_SNV	SLC27A5:NM_001321196:exon2:c.G590A:p.R197H,SLC27A5:NM_012254:exon2:c.G842A:p.R281H	0.0004	22.8
1	156846300	1:156846300:G:A	G	A	0.000334672	2988	ADD	5.0848	1.41986	11.0962	0.000865028	exonic	NTRK1	.	nonsynonymous_SNV	NTRK1:NM_001012331:exon13:c.G1723A:p.E575K,NTRK1:NM_001007792:exon14:c.G1633A:p.E545K,NTRK1:NM_002529:exon14:c.G1741A:p.E581K	0.0003	32
1	177905488	1:177905488:A:T	A	T	0.004182	2989	ADD	2.62061	0.613777	11.0943	0.000865944	exonic	CRYZL2P-SEC16B\x3bSEC16B	.	nonsynonymous_SNV	SEC16B:NM_001356500:exon19:c.T1493A:p.V498E,SEC16B:NM_033127:exon20:c.T2516A:p.V839E,CRYZL2P-SEC16B:NM_001356506:exon26:c.T2516A:p.V839E,CRYZL2P-SEC16B:NM_001356505:exon28:c.T2516A:p.V839E	0.004	2.269
10	6470215	10:6470215:C:T	C	T	0.000334896	2986	ADD	5.07772	1.41748	11.0909	0.000867501	exonic	PRKCQ	.	nonsynonymous_SNV	PRKCQ:NM_001242413:exon17:c.G1886A:p.R629K,PRKCQ:NM_001282645:exon17:c.G1700A:p.R567K,PRKCQ:NM_001323266:exon17:c.G1700A:p.R567K,PRKCQ:NM_001282644:exon18:c.G1967A:p.R656K,PRKCQ:NM_001323265:exon18:c.G2075A:p.R692K,PRKCQ:NM_006257:exon18:c.G2075A:p.R692K	7.161e-05	15.32
5	170863132	5:170863132:C:G	C	G	0.000334672	2988	ADD	5.13104	1.4416	11.0851	0.000870242	exonic	FGF18	.	nonsynonymous_SNV	FGF18:NM_003862:exon3:c.C105G:p.I35M	0.0002	22.9
8	53853225	8:53853225:T:A	T	A	0.00033761	2962	ADD	5.0988	1.42771	11.0802	0.000872529	exonic	NPBWR1	.	nonsynonymous_SNV	NPBWR1:NM_005285:exon1:c.T758A:p.V253E	0.0001	32
5	137621421	5:137621421:C:T	C	T	0.00284757	2985	ADD	2.684	0.656622	11.0783	0.000873454	exonic	CDC25C	.	nonsynonymous_SNV	CDC25C:NM_022809:exon11:c.G1163A:p.R388Q,CDC25C:NM_001364028:exon12:c.G1253A:p.R418Q,CDC25C:NM_001364026:exon13:c.G1553A:p.R518Q,CDC25C:NM_001364027:exon13:c.G1280A:p.R427Q,CDC25C:NM_001287582:exon14:c.G1382A:p.R461Q,CDC25C:NM_001287583:exon14:c.G1616A:p.R539Q,CDC25C:NM_001318098:exon14:c.G1433A:p.R478Q,CDC25C:NM_001790:exon14:c.G1382A:p.R461Q	0.0127	15.29
11	3239818	11:3239818:C:T	C	T	0.000673627	2969	ADD	3.89239	1.13636	11.074	0.000875488	exonic	MRGPRG	.	nonsynonymous_SNV	MRGPRG:NM_001164377:exon1:c.G226A:p.A76T	0.0755	0.199
7	134134517	7:134134517:C:T	C	T	0.00150905	2982	ADD	3.49118	0.848059	11.0685	0.000878072	exonic	AKR1B1	.	synonymous_SNV	AKR1B1:NM_001628:exon4:c.G384A:p.S128S	0.0022	0.062
7	100465747	7:100465747:G:T	G	T	0.00033456	2989	ADD	5.10084	1.43074	11.0683	0.000878173	exonic	TRIP6	.	nonsynonymous_SNV	TRIP6:NM_003302:exon3:c.G255T:p.R85S	0.0048	13.75
12	85255668	12:85255668:C:T	C	T	0.000338639	2953	ADD	5.06306	1.41579	11.0554	0.000884301	exonic	SLC6A15	.	nonsynonymous_SNV	SLC6A15:NM_001146335:exon11:c.G1615A:p.D539N,SLC6A15:NM_182767:exon12:c.G1936A:p.D646N	0.0002	19.11
16	57060724	16:57060724:G:A	G	A	0.0524113	2986	ADD	-1.98787	0.712557	11.0511	0.00088636	exonic	NLRC5	.	synonymous_SNV	NLRC5:NM_032206:exon5:c.G1869A:p.Q623Q,NLRC5:NM_001330552:exon6:c.G1869A:p.Q623Q	0.2519	10.46
12	19440412	12:19440412:C:G	C	G	0.00033456	2989	ADD	5.057	1.41566	11.0411	0.000891128	exonic	PLEKHA5	.	synonymous_SNV	PLEKHA5:NM_001256787:exon10:c.C1443G:p.V481V,PLEKHA5:NM_001143821:exon12:c.C1767G:p.V589V,PLEKHA5:NM_019012:exon12:c.C1767G:p.V589V,PLEKHA5:NM_001256470:exon13:c.C1785G:p.V595V	0.0012	9.718
6	24403275	6:24403275:A:G	A	G	0.000337268	2965	ADD	5.10643	1.43742	11.0375	0.000892894	exonic	MRS2	.	startloss	MRS2:NM_001286264:exon1:c.A1G:p.M1?,MRS2:NM_001286265:exon1:c.A1G:p.M1?,MRS2:NM_001286266:exon1:c.A1G:p.M1?,MRS2:NM_020662:exon1:c.A1G:p.M1?	0.0011	25.4
11	58190106	11:58190106:A:G	A	G	0.000335008	2985	ADD	5.247	1.50347	11.0284	0.000897284	exonic	OR5B2	.	nonsynonymous_SNV	OR5B2:NM_001005566:exon1:c.T629C:p.L210P	0.001	14.5
3	142395072	3:142395072:A:G	A	G	0.000334672	2988	ADD	5.23297	1.49737	11.0252	0.000898814	exonic	PLS1	.	nonsynonymous_SNV	PLS1:NM_001145319:exon5:c.A438G:p.I146M,PLS1:NM_001172312:exon5:c.A438G:p.I146M,PLS1:NM_002670:exon5:c.A438G:p.I146M	0.0631	12.8
3	142122599	3:142122599:T:C	T	C	0.000336814	2969	ADD	5.23245	1.49738	11.0217	0.000900534	exonic	XRN1	.	nonsynonymous_SNV	XRN1:NM_001282857:exon18:c.A2020G:p.S674G,XRN1:NM_019001:exon18:c.A2020G:p.S674G	0.0433	22
22	37333972	22:37333972:GC:G	GC	G	0.0016728	2989	ADD	2.84238	0.751178	11.0212	0.000900783	exonic	CSF2RB	.	frameshift_deletion	CSF2RB:NM_000395:exon14:c.2123delC:p.S709Lfs*22	0.0247	25.7
15	63982815	15:63982815:C:T	C	T	0.000334672	2988	ADD	5.04868	1.41561	11.0174	0.00090263	exonic	HERC1	.	synonymous_SNV	HERC1:NM_003922:exon32:c.G5862A:p.R1954R	0.0002	7.916
4	52869538	4:52869538:A:G	A	G	0.000334896	2986	ADD	5.07688	1.42872	11.0118	0.000905336	exonic	LRRC66	.	synonymous_SNV	LRRC66:NM_001024611:exon3:c.T517C:p.L173L	0.0002	5.342
14	31614121	14:31614121:G:A	G	A	0.00033761	2962	ADD	5.04422	1.41536	11.0033	0.000909515	exonic	HECTD1	.	synonymous_SNV	HECTD1:NM_015382:exon16:c.C2523T:p.Y841Y	0.0002	7.419
6	2836460	6:2836460:G:A	G	A	0.000502681	2984	ADD	4.97782	1.22698	10.9889	0.0009166	exonic	SERPINB1	.	nonsynonymous_SNV	SERPINB1:NM_030666:exon5:c.C449T:p.S150L	0.0008	10.26
8	74722769	8:74722769:C:T	C	T	0.000684932	2920	ADD	3.59409	1.02794	10.9836	0.0009192	exonic	UBE2W	.	synonymous_SNV	UBE2W:NM_001271015:exon4:c.G306A:p.A102A,UBE2W:NM_018299:exon4:c.G306A:p.A102A,UBE2W:NM_001001481:exon5:c.G339A:p.A113A	0.001	9.238
20	44538269	20:44538269:G:T	G	T	0.000502513	2985	ADD	4.12361	1.31108	10.981	0.000920492	exonic	PLTP	.	nonsynonymous_SNV	PLTP:NM_001242921:exon3:c.C107A:p.S36Y,PLTP:NM_006227:exon5:c.C371A:p.S124Y	0.0444	17.56
4	15063731	4:15063731:G:A	G	A	0.000335233	2983	ADD	5.19229	1.48522	10.9803	0.000920874	exonic	CPEB2	.	synonymous_SNV	CPEB2:NM_001177384:exon9:c.G2619A:p.L873L,CPEB2:NM_182646:exon9:c.G2610A:p.L870L,CPEB2:NM_001177381:exon10:c.G2643A:p.L881L,CPEB2:NM_001177383:exon10:c.G2634A:p.L878L,CPEB2:NM_182485:exon10:c.G2700A:p.L900L,CPEB2:NM_001177382:exon11:c.G2724A:p.L908L	0.1043	8.975
11	24759780	11:24759780:T:G	T	G	0.000506757	2960	ADD	5.00571	1.52129	10.974	0.000923996	exonic	LUZP2	.	nonsynonymous_SNV	LUZP2:NM_001009909:exon4:c.T265G:p.S89A,LUZP2:NM_001252008:exon4:c.T7G:p.S3A,LUZP2:NM_001252010:exon4:c.T265G:p.S89A	0.0151	22.9
20	37546868	20:37546868:C:T	C	T	0.00033456	2989	ADD	5.18376	1.48239	10.9733	0.000924336	exonic	PPP1R16B	.	synonymous_SNV	PPP1R16B:NM_001172735:exon10:c.C1137T:p.D379D,PPP1R16B:NM_015568:exon11:c.C1263T:p.D421D	0.001	8.643
15	65623432	15:65623432:G:GC	G	GC	0.000334672	2988	ADD	5.13532	1.46056	10.9726	0.000924698	exonic	IGDCC3	.	frameshift_insertion	IGDCC3:NM_004884:exon9:c.1516dupG:p.A506Gfs*11	2.688e-05	33
10	28024177	10:28024177:C:T	C	T	0.0126263	2970	ADD	1.66276	0.42691	10.9678	0.000927107	exonic	MKX	.	nonsynonymous_SNV	MKX:NM_001242702:exon4:c.G475A:p.V159I,MKX:NM_173576:exon4:c.G475A:p.V159I	0.0114	15.15
17	8146311	17:8146311:G:C	G	C	0.000335121	2984	ADD	5.11237	1.45178	10.9615	0.000930229	exonic	CTC1	.	synonymous_SNV	CTC1:NM_025099:exon2:c.C189G:p.L63L	0.0033	11.49
4	186598516	4:186598516:C:T	C	T	0.000334672	2988	ADD	5.02718	1.41558	10.9558	0.000933082	exonic	SORBS2	.	nonsynonymous_SNV	SORBS2:NM_001145673:exon5:c.G127A:p.A43T	0.001	5.489
9	138662895	9:138662895:C:T	C	T	0.000334896	2986	ADD	5.33521	1.5593	10.9505	0.000935793	exonic	KCNT1	.	synonymous_SNV	KCNT1:NM_001272003:exon17:c.C1827T:p.H609H,KCNT1:NM_020822:exon18:c.C1962T:p.H654H	0.0002	1.248
17	27899662	17:27899662:G:T	G	T	0.00335233	2983	ADD	2.31766	0.592122	10.948	0.000937044	exonic	TP53I13	.	nonsynonymous_SNV	TP53I13:NM_001346079:exon5:c.G887T:p.R296L,TP53I13:NM_001346081:exon5:c.G668T:p.R223L,TP53I13:NM_001346077:exon6:c.G941T:p.R314L,TP53I13:NM_001346078:exon6:c.G941T:p.R314L,TP53I13:NM_001346082:exon6:c.G668T:p.R223L,TP53I13:NM_138349:exon6:c.G1016T:p.R339L	0.0019	26.3
17	27899663	17:27899663:C:T	C	T	0.00335345	2982	ADD	2.3176	0.592132	10.947	0.00093754	exonic	TP53I13	.	synonymous_SNV	TP53I13:NM_001346079:exon5:c.C888T:p.R296R,TP53I13:NM_001346081:exon5:c.C669T:p.R223R,TP53I13:NM_001346077:exon6:c.C942T:p.R314R,TP53I13:NM_001346078:exon6:c.C942T:p.R314R,TP53I13:NM_001346082:exon6:c.C669T:p.R223R,TP53I13:NM_138349:exon6:c.C1017T:p.R339R	0.0019	10.83
5	72419613	5:72419613:C:G	C	G	0.000334672	2988	ADD	5.01984	1.41691	10.9243	0.000949139	exonic	TMEM171	.	nonsynonymous_SNV	TMEM171:NM_001161342:exon2:c.C413G:p.S138C,TMEM171:NM_173490:exon2:c.C413G:p.S138C	0.0002	17.11
1	152193547	1:152193547:G:A	G	A	0.999665	2989	ADD	-5.02901	1.42422	10.9002	0.000961568	exonic	HRNR	.	synonymous_SNV	HRNR:NM_001009931:exon3:c.C558T:p.S186S	1	0.077
1	45271250	1:45271250:C:T	C	T	0.00033456	2989	ADD	5.15495	1.48229	10.8899	0.000966874	exonic	PLK3	.	nonsynonymous_SNV	PLK3:NM_004073:exon15:c.C1841T:p.T614I	0.0005	28.1
19	2917542	19:2917542:A:G	A	G	0.00234663	2983	ADD	2.7053	0.685064	10.8895	0.000967141	exonic	ZNF57	.	nonsynonymous_SNV	ZNF57:NM_001319083:exon4:c.A827G:p.Y276C,ZNF57:NM_173480:exon4:c.A923G:p.Y308C	0.0042	15.7
16	31926619	16:31926619:G:A	G	A	0.968096	2915	ADD	-1.11149	0.293853	10.8885	0.000967632	exonic	ZNF267	.	nonsynonymous_SNV	ZNF267:NM_003414:exon4:c.G1049A:p.C350Y,ZNF267:NM_001265588:exon5:c.G953A:p.C318Y	1	0.392
21	37833694	21:37833694:G:A	G	A	0.00104457	2872	ADD	3.454	0.907659	10.878	0.00097315	exonic	CLDN14	.	synonymous_SNV	CLDN14:NM_001146079:exon2:c.C300T:p.I100I,CLDN14:NM_012130:exon2:c.C300T:p.I100I,CLDN14:NM_001146077:exon3:c.C300T:p.I100I,CLDN14:NM_001146078:exon3:c.C300T:p.I100I,CLDN14:NM_144492:exon3:c.C300T:p.I100I	0.0331	0.055
9	123540764	9:123540764:T:C	T	C	0.00117214	2986	ADD	3.45579	0.871421	10.8769	0.000973711	exonic	FBXW2	.	nonsynonymous_SNV	FBXW2:NM_012164:exon4:c.A550G:p.I184V	0.0012	23.5
11	85396881	11:85396881:T:C	T	C	0.000334896	2986	ADD	5.14122	1.4787	10.8727	0.000975911	exonic	CCDC89	.	nonsynonymous_SNV	CCDC89:NM_152723:exon1:c.A293G:p.N98S	0.0001	25.2
20	60868966	20:60868966:C:G	C	G	0.000674309	2966	ADD	4.77982	1.16113	10.867	0.000978926	exonic	OSBPL2	.	nonsynonymous_SNV	OSBPL2:NM_001278649:exon13:c.C1066G:p.R356G	0.0132	3.196
3	65415540	3:65415540:C:T	C	T	0.000502681	2984	ADD	4.12536	1.29724	10.8657	0.000979625	exonic	MAGI1	.	nonsynonymous_SNV	MAGI1:NM_001033057:exon12:c.G1822A:p.A608T,MAGI1:NM_001365903:exon12:c.G1825A:p.A609T,MAGI1:NM_001365904:exon12:c.G1825A:p.A609T,MAGI1:NM_001365905:exon12:c.G1825A:p.A609T,MAGI1:NM_004742:exon12:c.G1822A:p.A608T,MAGI1:NM_015520:exon12:c.G1822A:p.A608T	0.0003	17.93
14	90650684	14:90650684:C:T	C	T	0.0351523	2987	ADD	1.15625	0.305166	10.8504	0.000987734	exonic	KCNK13	.	synonymous_SNV	KCNK13:NM_022054:exon2:c.C564T:p.A188A	0.2198	0.03
16	84495635	16:84495635:G:A	G	A	0.00083696	2987	ADD	3.61582	0.995169	10.844	0.000991151	exonic	ATP2C2	.	nonsynonymous_SNV	ATP2C2:NM_001291454:exon23:c.G2169A:p.M723I,ATP2C2:NM_014861:exon26:c.G2622A:p.M874I,ATP2C2:NM_001286527:exon27:c.G2709A:p.M903I	0.001	22.9
1	21137376	1:21137376:G:A	G	A	0.000334672	2988	ADD	5.01135	1.42553	10.8397	0.000993482	exonic	EIF4G3	.	synonymous_SNV	EIF4G3:NM_003760:exon31:c.C4431T:p.A1477A,EIF4G3:NM_001198801:exon34:c.C4539T:p.A1513A,EIF4G3:NM_001198802:exon34:c.C4449T:p.A1483A	0.0002	9.351
4	2233827	4:2233827:TGAG:T	TGAG	T	0.000334896	2986	ADD	5.07757	1.45518	10.8367	0.000995062	exonic	HAUS3	.	nonframeshift_deletion	HAUS3:NM_024511:exon5:c.1636_1638del:p.L546del,HAUS3:NM_001303143:exon6:c.1636_1638del:p.L546del	0.0001	19.88
4	22422615	4:22422615:C:T	C	T	0.00117135	2988	ADD	3.46952	0.875927	10.8333	0.000996942	exonic	ADGRA3	.	nonsynonymous_SNV	ADGRA3:NM_145290:exon12:c.G1703A:p.R568H	0.0024	25.1
3	100595400	3:100595400:G:A	G	A	0.000334672	2988	ADD	5.13475	1.48242	10.826	0.00100088	exonic	ABI3BP	.	nonsynonymous_SNV	ABI3BP:NM_001349329:exon7:c.C722T:p.A241V,ABI3BP:NM_001349330:exon7:c.C722T:p.A241V,ABI3BP:NM_001349331:exon7:c.C722T:p.A241V,ABI3BP:NM_001349332:exon7:c.C722T:p.A241V,ABI3BP:NM_001365642:exon7:c.C722T:p.A241V,ABI3BP:NM_001365643:exon7:c.C722T:p.A241V,ABI3BP:NM_015429:exon7:c.C722T:p.A241V	0.0003	20.4
2	242157228	2:242157228:G:C	G	C	0.00489339	2861	ADD	2.11553	0.544298	10.8226	0.0010027	exonic	ANO7	.	synonymous_SNV	ANO7:NM_001370694:exon20:c.G2100C:p.P700P	0.3577	11.51
13	101881777	13:101881777:G:A	G	A	0.355057	2877	ADD	-0.625675	0.189932	10.8184	0.00100496	exonic	NALCN	.	synonymous_SNV	NALCN:NM_001350750:exon12:c.C1506T:p.V502V,NALCN:NM_001350751:exon12:c.C1506T:p.V502V,NALCN:NM_001350748:exon13:c.C1593T:p.V531V,NALCN:NM_001350749:exon13:c.C1593T:p.V531V,NALCN:NM_052867:exon13:c.C1593T:p.V531V	0.3671	1.28
19	54968038	19:54968038:A:G	A	G	0.0222597	2965	ADD	1.36035	0.352863	10.8161	0.00100619	exonic	LENG8	.	nonsynonymous_SNV	LENG8:NM_052925:exon11:c.A1669G:p.I557V	0.0892	17.06
1	242042437	1:242042437:G:A	G	A	0.00301205	2988	ADD	2.12595	0.604242	10.8075	0.0010109	exonic	EXO1	.	nonsynonymous_SNV	EXO1:NM_003686:exon11:c.G1901A:p.R634Q,EXO1:NM_006027:exon11:c.G1901A:p.R634Q,EXO1:NM_001319224:exon12:c.G1898A:p.R633Q,EXO1:NM_130398:exon13:c.G1901A:p.R634Q	0.0066	0.964
19	42838197	19:42838197:G:A	G	A	0.000837521	2985	ADD	3.53579	0.980548	10.8033	0.00101316	exonic	MEGF8	.	synonymous_SNV	MEGF8:NM_001271938:exon3:c.G390A:p.L130L,MEGF8:NM_001410:exon3:c.G390A:p.L130L	0.001	5.58
1	115276625	1:115276625:T:A	T	A	0.000334672	2988	ADD	4.9748	1.41539	10.8014	0.00101424	exonic	CSDE1	.	synonymous_SNV	CSDE1:NM_001242893:exon6:c.A603T:p.T201T,CSDE1:NM_001242892:exon7:c.A696T:p.T232T,CSDE1:NM_007158:exon7:c.A603T:p.T201T,CSDE1:NM_001007553:exon8:c.A696T:p.T232T,CSDE1:NM_001130523:exon8:c.A741T:p.T247T,CSDE1:NM_001242891:exon9:c.A834T:p.T278T	6.666e-05	13.15
20	13899681	20:13899681:T:A	T	A	0.00150552	2989	ADD	3.34869	0.824127	10.795	0.00101775	exonic	SEL1L2	.	nonsynonymous_SNV	SEL1L2:NM_001271539:exon4:c.A372T:p.Q124H,SEL1L2:NM_001363752:exon4:c.A36T:p.Q12H,SEL1L2:NM_025229:exon4:c.A372T:p.Q124H	0.0008	22.1
19	9325018	19:9325018:A:G	A	G	0.00066912	2989	ADD	3.68459	1.08838	10.7848	0.00102339	exonic	OR7D4	.	synonymous_SNV	OR7D4:NM_001005191:exon1:c.T496C:p.L166L	0.0533	0.237
23	66766013	X:66766013:C:T	C	T	0.000669344	2988	ADD	2.54932	0.736876	10.7769	0.00102773	exonic	AR	.	nonsynonymous_SNV	AR:NM_000044:exon1:c.C1025T:p.P342L,AR:NM_001348061:exon1:c.C1025T:p.P342L,AR:NM_001348063:exon1:c.C1025T:p.P342L,AR:NM_001348064:exon1:c.C1025T:p.P342L	0.0002	NA
10	21962427	10:21962427:T:C	T	C	0.000503356	2980	ADD	4.01378	1.32763	10.7657	0.00103397	exonic	MLLT10	.	synonymous_SNV	MLLT10:NM_001195626:exon11:c.T1200C:p.H400H,MLLT10:NM_004641:exon11:c.T1200C:p.H400H,MLLT10:NM_001324297:exon13:c.T465C:p.H155H	0.0006	11.2
1	39789890	1:39789890:A:T	A	T	0.000502008	2988	ADD	3.83612	1.2492	10.7589	0.00103779	exonic	MACF1	.	nonsynonymous_SNV	MACF1:NM_012090:exon33:c.A4277T:p.E1426V	0.0012	23.2
1	171605478	1:171605478:G:A	G	A	0.00133824	2989	ADD	3.31251	0.808834	10.7568	0.00103896	exonic	MYOC	.	stopgain	MYOC:NM_000261:exon3:c.C1102T:p.Q368X	0.0038	37
5	149754519	5:149754519:G:A	G	A	0.00369499	2977	ADD	2.34181	0.598019	10.7556	0.00103963	exonic	TCOF1	.	synonymous_SNV	TCOF1:NM_000356:exon9:c.G1050A:p.A350A,TCOF1:NM_001135245:exon9:c.G1050A:p.A350A,TCOF1:NM_001008657:exon10:c.G1281A:p.A427A,TCOF1:NM_001135243:exon10:c.G1281A:p.A427A,TCOF1:NM_001135244:exon10:c.G1281A:p.A427A,TCOF1:NM_001195141:exon10:c.G1281A:p.A427A	0.0051	1.804
16	20797442	16:20797442:G:A	G	A	0.000334784	2987	ADD	4.95778	1.41629	10.744	0.00104616	exonic	ACSM3	.	nonsynonymous_SNV	ACSM3:NM_005622:exon9:c.G1186A:p.G396S,ACSM3:NM_202000:exon9:c.G1186A:p.G396S	2.752e-05	32
22	46785282	22:46785282:G:A	G	A	0.000342466	2920	ADD	4.95687	1.41521	10.7435	0.00104648	exonic	CELSR1	.	nonsynonymous_SNV	CELSR1:NM_014246:exon18:c.C6460T:p.R2154C	0.0002	26.5
23	63409894	X:63409894:C:T	C	T	0.000334672	2988	ADD	5.1407	1.49919	10.7409	0.00104792	exonic	AMER1	.	synonymous_SNV	AMER1:NM_152424:exon2:c.G3273A:p.R1091R	0.0039	NA
14	38724346	14:38724346:C:T	C	T	0.00574518	2959	ADD	2.20634	0.549049	10.7397	0.00104862	exonic	CLEC14A	.	synonymous_SNV	CLEC14A:NM_175060:exon1:c.G882A:p.P294P	0.0072	4.348
2	29917742	2:29917742:G:A	G	A	0.000336247	2974	ADD	5.04077	1.45327	10.7396	0.00104867	exonic	ALK	.	nonsynonymous_SNV	ALK:NM_004304:exon3:c.C926T:p.A309V	0	21.5
20	32664928	20:32664928:C:T	C	T	0.000350018	2857	ADD	5.31573	1.58438	10.7357	0.00105087	exonic	RALY	.	synonymous_SNV	RALY:NM_007367:exon7:c.C705T:p.G235G,RALY:NM_016732:exon8:c.C753T:p.G251G	0.0001	3.801
8	21905706	8:21905706:C:T	C	T	0.00414508	2895	ADD	2.25664	0.57719	10.7355	0.00105102	exonic	FGF17	.	synonymous_SNV	FGF17:NM_001304478:exon5:c.C564T:p.G188G,FGF17:NM_003867:exon5:c.C597T:p.G199G	0.0053	12.82
21	28216862	21:28216862:C:A	C	A	0.00190906	2881	ADD	3.32871	0.793886	10.7333	0.00105225	exonic	ADAMTS1	.	nonsynonymous_SNV	ADAMTS1:NM_006988:exon1:c.G412T:p.A138S	0.0033	24.7
10	102257821	10:102257821:G:A	G	A	0.000334672	2988	ADD	5.0066	1.43953	10.7311	0.00105351	exonic	SEC31B	.	nonsynonymous_SNV	SEC31B:NM_015490:exon15:c.C1828T:p.R610C	0.0011	18.03
17	4804416	17:4804416:C:T	C	T	0.000341413	2929	ADD	4.96324	1.4208	10.7252	0.00105684	exonic	CHRNE	.	nonsynonymous_SNV	CHRNE:NM_000080:exon7:c.G671A:p.G224D	0.0002	0.218
10	97373724	10:97373724:T:C	T	C	0.000335121	2984	ADD	5.05699	1.46296	10.725	0.00105696	exonic	ALDH18A1	.	synonymous_SNV	ALDH18A1:NM_001323419:exon11:c.A1164G:p.L388L,ALDH18A1:NM_001323412:exon13:c.A1467G:p.L489L,ALDH18A1:NM_001323416:exon13:c.A1467G:p.L489L,ALDH18A1:NM_001323417:exon13:c.A1695G:p.L565L,ALDH18A1:NM_001323418:exon13:c.A1461G:p.L487L,ALDH18A1:NM_001017423:exon14:c.A1794G:p.L598L,ALDH18A1:NM_001323413:exon14:c.A1800G:p.L600L,ALDH18A1:NM_001323414:exon14:c.A1800G:p.L600L,ALDH18A1:NM_001323415:exon14:c.…	6.659e-05	11.27
22	26690388	22:26690388:C:T	C	T	0.00033557	2980	ADD	5.02159	1.44704	10.7243	0.0010574	exonic	SEZ6L	.	synonymous_SNV	SEZ6L:NM_001184773:exon3:c.C966T:p.L322L,SEZ6L:NM_001184774:exon3:c.C966T:p.L322L,SEZ6L:NM_001184775:exon3:c.C966T:p.L322L,SEZ6L:NM_001184776:exon3:c.C966T:p.L322L,SEZ6L:NM_001184777:exon3:c.C966T:p.L322L,SEZ6L:NM_021115:exon3:c.C966T:p.L322L	5.384e-05	11.04
23	48831663	X:48831663:G:A	G	A	0.00050184	2989	ADD	2.75166	1.0149	10.7168	0.00106167	exonic	GRIPAP1	.	synonymous_SNV	GRIPAP1:NM_020137:exon25:c.C2337T:p.D779D	0.0016	NA
4	37446452	4:37446452:C:T	C	T	0.00033456	2989	ADD	4.47467	2.02911	10.7142	0.00106319	exonic	NWD2	.	synonymous_SNV	NWD2:NM_001144990:exon7:c.C2842T:p.L948L	0.0397	0.071
14	54418878	14:54418878:C:G	C	G	0.000334672	2988	ADD	4.94457	1.41594	10.7087	0.00106633	exonic	BMP4	.	synonymous_SNV	BMP4:NM_001347914:exon2:c.G63C:p.A21A,BMP4:NM_001202:exon3:c.G63C:p.A21A,BMP4:NM_001347912:exon3:c.G204C:p.A68A,BMP4:NM_001347916:exon3:c.G63C:p.A21A,BMP4:NM_130850:exon3:c.G63C:p.A21A,BMP4:NM_130851:exon3:c.G63C:p.A21A	0.0036	14.21
16	24582698	16:24582698:A:G	A	G	0.00486251	2982	ADD	2.20451	0.550556	10.7003	0.0010712	exonic	RBBP6	.	synonymous_SNV	RBBP6:NM_018703:exon17:c.A4209G:p.Q1403Q,RBBP6:NM_006910:exon18:c.A4311G:p.Q1437Q	0.0071	8.345
5	61785999	5:61785999:A:G	A	G	0.000502513	2985	ADD	4.81963	1.20036	10.6958	0.00107379	exonic	IPO11	.	nonsynonymous_SNV	IPO11:NM_001134779:exon15:c.A1535G:p.Q512R,IPO11:NM_016338:exon15:c.A1415G:p.Q472R	5.431e-05	22.5
1	54060248	1:54060248:T:C	T	C	0.311423	2959	ADD	0.576182	0.167003	10.6904	0.00107691	exonic	GLIS1	.	nonsynonymous_SNV	GLIS1:NM_147193:exon3:c.A328G:p.T110A,GLIS1:NM_001367484:exon4:c.A853G:p.T285A	0.4597	11.2
23	38533570	X:38533570:C:T	C	T	0.00201072	2984	ADD	3.08045	0.78289	10.6895	0.00107746	exonic	TSPAN7	.	synonymous_SNV	TSPAN7:NM_004615:exon4:c.C441T:p.S147S	0.1143	NA
11	17793324	11:17793324:G:T	G	T	0.000334784	2987	ADD	4.96298	1.4278	10.68	0.00108303	exonic	KCNC1	.	nonsynonymous_SNV	KCNC1:NM_001112741:exon2:c.G683T:p.R228L,KCNC1:NM_004976:exon2:c.G683T:p.R228L	0.0006	22.2
1	200562840	1:200562840:T:C	T	C	0.000334672	2988	ADD	5.27473	1.57679	10.6669	0.00109071	exonic	KIF14	.	synonymous_SNV	KIF14:NM_001305792:exon13:c.A1134G:p.T378T,KIF14:NM_014875:exon15:c.A2607G:p.T869T	6.663e-05	7.217
17	40659637	17:40659637:G:A	G	A	0.000335008	2985	ADD	5.15672	1.51879	10.6626	0.00109325	exonic	ATP6V0A1	.	nonsynonymous_SNV	ATP6V0A1:NM_001130020:exon18:c.G2125A:p.A709T,ATP6V0A1:NM_001130021:exon18:c.G2104A:p.A702T,ATP6V0A1:NM_005177:exon18:c.G2104A:p.A702T	0.0002	22
22	50695073	22:50695073:G:A	G	A	0.00016728	2989	ADD	5.38706	2.31282	10.6597	0.00109494	exonic	MAPK12	.	synonymous_SNV	MAPK12:NM_001303252:exon5:c.C429T:p.D143D,MAPK12:NM_002969:exon6:c.C459T:p.D153D	0	14.27
12	81110946	12:81110946:G:A	G	A	0.000169205	2955	ADD	5.38756	2.31276	10.6596	0.00109499	exonic	MYF5	.	nonsynonymous_SNV	MYF5:NM_005593:exon1:c.G104A:p.R35Q	8.972e-06	21.6
11	117789418	11:117789418:G:A	G	A	0.000336587	2971	ADD	5.08272	1.48486	10.6589	0.00109542	exonic	TMPRSS13	.	nonsynonymous_SNV	TMPRSS13:NM_001077263:exon2:c.C157T:p.R53W,TMPRSS13:NM_001206789:exon2:c.C157T:p.R53W,TMPRSS13:NM_001206790:exon2:c.C157T:p.R53W,TMPRSS13:NM_001244995:exon2:c.C157T:p.R53W	0.0394	13.88
22	50658858	22:50658858:T:TG	T	TG	0.000169779	2945	ADD	5.3863	2.31238	10.6565	0.00109683	exonic	TUBGCP6	.	frameshift_insertion	TUBGCP6:NM_020461:exon16:c.3929dupC:p.Q1311Tfs*57	0	23
10	21435322	10:21435322:T:C	T	C	0.000669568	2987	ADD	3.93497	1.20539	10.6471	0.00110243	intronic	NEBL	.	.	.	0.0008	0.422
20	62187126	20:62187126:C:T	C	T	0.00033456	2989	ADD	4.94601	1.42616	10.6431	0.00110484	exonic	FNDC11	.	nonsynonymous_SNV	FNDC11:NM_001319152:exon2:c.C110T:p.A37V,FNDC11:NM_001319153:exon2:c.C110T:p.A37V,FNDC11:NM_024059:exon2:c.C110T:p.A37V	0.0008	17.21
11	18555965	11:18555965:G:A	G	A	0.000335345	2982	ADD	5.20237	1.54519	10.6427	0.00110507	exonic	UEVLD	.	nonsynonymous_SNV	UEVLD:NM_001261384:exon9:c.C770T:p.S257F,UEVLD:NM_001261382:exon10:c.C1094T:p.S365F,UEVLD:NM_001040697:exon11:c.C1160T:p.S387F	8.785e-05	28.4
19	50311997	19:50311997:G:A	G	A	0.000343643	2910	ADD	4.99399	1.44764	10.6344	0.00111007	exonic	FUZ	.	synonymous_SNV	FUZ:NM_001171937:exon7:c.C762T:p.F254F,FUZ:NM_001352262:exon8:c.C870T:p.F290F,FUZ:NM_001363663:exon8:c.C720T:p.F240F,FUZ:NM_025129:exon8:c.C870T:p.F290F	0.012	11.69
23	129190081	X:129190081:C:T	C	T	0.000167336	2988	ADD	5.38138	2.31631	10.6316	0.00111171	exonic	BCORL1	.	synonymous_SNV	BCORL1:NM_021946:exon12:c.C5106T:p.S1702S,BCORL1:NM_001184772:exon13:c.C5328T:p.S1776S	0.0028	NA
23	140969356	X:140969356:A:G	A	G	0.000167336	2988	ADD	5.38137	2.31631	10.6316	0.00111171	exonic	MAGEC3	.	nonsynonymous_SNV	MAGEC3:NM_138702:exon4:c.A683G:p.K228R	0.0206	NA
23	140985558	X:140985558:T:G	T	G	0.000167336	2988	ADD	5.38137	2.31631	10.6316	0.00111171	exonic	MAGEC3	.	nonsynonymous_SNV	MAGEC3:NM_138702:exon8:c.T1872G:p.D624E	0.0359	NA
23	57405161	X:57405161:C:T	C	T	0.00016756	2984	ADD	5.38126	2.31624	10.6311	0.00111199	exonic	FAAH2	.	nonsynonymous_SNV	FAAH2:NM_001353841:exon5:c.C610T:p.R204C,FAAH2:NM_001353840:exon6:c.C820T:p.R274C,FAAH2:NM_174912:exon6:c.C820T:p.R274C	0.0003	NA
23	68060264	X:68060264:C:T	C	T	0.00016756	2984	ADD	5.38124	2.31623	10.6311	0.00111204	exonic	EFNB1	.	nonsynonymous_SNV	EFNB1:NM_004429:exon5:c.C808T:p.R270C	0.0002	NA
7	73950521	7:73950521:C:T	C	T	0.000334672	2988	ADD	4.9167	1.41502	10.6309	0.00111212	exonic	GTF2IRD1	.	nonsynonymous_SNV	GTF2IRD1:NM_001199207:exon11:c.C1421T:p.T474M,GTF2IRD1:NM_005685:exon11:c.C1325T:p.T442M,GTF2IRD1:NM_016328:exon11:c.C1325T:p.T442M	0.0002	17.32
18	77473127	18:77473127:C:T	C	T	0.183636	2976	ADD	-0.848345	0.271422	10.6302	0.00111253	exonic	CTDP1	.	nonsynonymous_SNV	CTDP1:NM_001202504:exon7:c.C662T:p.T221M,CTDP1:NM_001318511:exon7:c.C1019T:p.T340M,CTDP1:NM_004715:exon7:c.C1019T:p.T340M,CTDP1:NM_048368:exon7:c.C1019T:p.T340M	0.1952	2.904
23	117043904	X:117043904:G:A	G	A	0.000168691	2964	ADD	5.38084	2.316	10.6295	0.00111301	exonic	KLHL13	.	synonymous_SNV	KLHL13:NM_001168300:exon5:c.C708T:p.F236F,KLHL13:NM_001168303:exon5:c.C600T:p.F200F,KLHL13:NM_033495:exon5:c.C726T:p.F242F,KLHL13:NM_001168299:exon6:c.C735T:p.F245F,KLHL13:NM_001168301:exon6:c.C678T:p.F226F,KLHL13:NM_001168302:exon6:c.C678T:p.F226F	0.0407	NA
19	15568616	19:15568616:C:G	C	G	0.000334896	2986	ADD	4.931	1.42309	10.6233	0.00111673	exonic	RASAL3	.	synonymous_SNV	RASAL3:NM_001348027:exon9:c.G918C:p.L306L,RASAL3:NM_001348028:exon9:c.G900C:p.L300L,RASAL3:NM_022904:exon9:c.G918C:p.L306L	9.473e-05	12.09
15	58001325	15:58001325:G:A	G	A	0.00100435	2987	ADD	3.44801	0.912537	10.623	0.00111689	exonic	GCOM1\x3bPOLR2M	.	nonsynonymous_SNV	POLR2M:NM_015532:exon2:c.G527A:p.R176H,GCOM1:NM_001285900:exon13:c.G1718A:p.R573H	0.0005	6.462
23	153176170	X:153176170:C:T	C	T	0.000175562	2848	ADD	5.37884	2.31483	10.621	0.00111807	exonic	ARHGAP4	.	synonymous_SNV	ARHGAP4:NM_001666:exon15:c.G1800A:p.E600E,ARHGAP4:NM_001164741:exon16:c.G1920A:p.E640E	0	NA
19	10265725	19:10265725:G:A	G	A	0.00134003	2985	ADD	3.43615	0.875339	10.6157	0.00112132	exonic	DNMT1	.	synonymous_SNV	DNMT1:NM_001318730:exon19:c.C1452T:p.A484A,DNMT1:NM_001379:exon19:c.C1452T:p.A484A,DNMT1:NM_001130823:exon20:c.C1500T:p.A500A,DNMT1:NM_001318731:exon20:c.C1137T:p.A379A	0.049	0.414
9	139911669	9:139911669:C:T	C	T	0.000336361	2973	ADD	5.14606	1.52244	10.6132	0.00112285	exonic	ABCA2	.	synonymous_SNV	ABCA2:NM_001606:exon18:c.G2532A:p.T844T,ABCA2:NM_212533:exon18:c.G2622A:p.T874T	0.0004	6.081
10	118360638	10:118360638:G:C	G	C	0.000167336	2988	ADD	5.3707	2.31259	10.6128	0.00112308	exonic	PNLIPRP1	.	nonsynonymous_SNV	PNLIPRP1:NM_001303135:exon10:c.G988C:p.D330H,PNLIPRP1:NM_006229:exon10:c.G988C:p.D330H	0	25.2
18	55020141	18:55020141:C:G	C	G	0.000334672	2988	ADD	4.98724	1.44848	10.6125	0.00112326	exonic	ST8SIA3	.	nonsynonymous_SNV	ST8SIA3:NM_015879:exon1:c.C64G:p.L22V	0.0001	14.02
10	103294635	10:103294635:A:G	A	G	0.000167448	2986	ADD	5.37056	2.31251	10.6122	0.00112347	exonic	BTRC	.	nonsynonymous_SNV	BTRC:NM_001256856:exon9:c.A1237G:p.I413V,BTRC:NM_003939:exon9:c.A1207G:p.I403V,BTRC:NM_033637:exon10:c.A1315G:p.I439V	0.0008	25.3
23	19983307	X:19983307:CTTCT:C	CTTCT	C	0.000167336	2988	ADD	5.36845	2.31136	10.6115	0.00112385	exonic	BCLAF3	.	frameshift_deletion	BCLAF3:NM_001367774:exon3:c.1125_1128del:p.E376Gfs*23,BCLAF3:NM_198279:exon3:c.1125_1128del:p.E376Gfs*23	1.284e-05	NA
23	53223703	X:53223703:A:C	A	C	0.000167336	2988	ADD	5.36845	2.31135	10.6115	0.00112388	exonic	KDM5C	.	nonsynonymous_SNV	KDM5C:NM_001146702:exon21:c.T3455G:p.L1152R,KDM5C:NM_001282622:exon23:c.T3653G:p.L1218R,KDM5C:NM_001353978:exon23:c.T3656G:p.L1219R,KDM5C:NM_001353979:exon23:c.T3653G:p.L1218R,KDM5C:NM_001353981:exon23:c.T3656G:p.L1219R,KDM5C:NM_001353982:exon23:c.T3653G:p.L1218R,KDM5C:NM_001353984:exon23:c.T3656G:p.L1219R,KDM5C:NM_004187:exon23:c.T3656G:p.L1219R	3.788e-05	NA
23	72433798	X:72433798:A:C	A	C	0.000167504	2985	ADD	5.36841	2.31133	10.6113	0.00112396	exonic	NAP1L2	.	nonsynonymous_SNV	NAP1L2:NM_021963:exon1:c.T531G:p.D177E	0.0003	NA
10	105194691	10:105194691:C:T	C	T	0.000168407	2969	ADD	5.3703	2.31235	10.6111	0.00112414	exonic	PDCD11	.	synonymous_SNV	PDCD11:NM_014976:exon25:c.C3804T:p.S1268S	0.0001	6.611
20	36953232	20:36953232:T:C	T	C	0.00033456	2989	ADD	4.9378	1.42762	10.6068	0.0011267	exonic	BPI	.	synonymous_SNV	BPI:NM_001725:exon9:c.T1002C:p.P334P	0.0002	2.278
19	51883882	19:51883882:C:G	C	G	0.000334672	2988	ADD	4.97357	1.44478	10.5991	0.00113141	exonic	LIM2	.	nonsynonymous_SNV	LIM2:NM_001161748:exon4:c.G337C:p.V113L,LIM2:NM_030657:exon4:c.G463C:p.V155L	0.0004	15.17
20	3678540	20:3678540:A:T	A	T	0.00016728	2989	ADD	5.36983	2.3163	10.5986	0.00113172	exonic	SIGLEC1	.	nonsynonymous_SNV	SIGLEC1:NM_001367089:exon8:c.T2027A:p.I676N,SIGLEC1:NM_023068:exon9:c.T2027A:p.I676N	0	24.5
20	43882362	20:43882362:C:T	C	T	0.00016728	2989	ADD	5.36983	2.3163	10.5986	0.00113172	exonic	SLPI	.	nonsynonymous_SNV	SLPI:NM_003064:exon2:c.G98A:p.G33E	6.668e-05	24
20	57571818	20:57571818:G:A	G	A	0.00016728	2989	ADD	5.36983	2.3163	10.5986	0.00113172	exonic	CTSZ	.	nonsynonymous_SNV	CTSZ:NM_001336:exon5:c.C677T:p.T226I	0	17.62
20	30671714	20:30671714:G:A	G	A	0.000167336	2988	ADD	5.36982	2.3163	10.5986	0.00113175	exonic	HCK	.	nonsynonymous_SNV	HCK:NM_001172129:exon7:c.G487A:p.V163M,HCK:NM_001172130:exon7:c.G547A:p.V183M,HCK:NM_001172131:exon7:c.G484A:p.V162M,HCK:NM_002110:exon7:c.G550A:p.V184M,HCK:NM_001172132:exon8:c.G490A:p.V164M,HCK:NM_001172133:exon8:c.G487A:p.V163M	6.671e-05	23
20	398473	20:398473:G:A	G	A	0.000167392	2987	ADD	5.36979	2.31628	10.5984	0.00113183	exonic	RBCK1	.	nonsynonymous_SNV	RBCK1:NM_001323958:exon3:c.G10A:p.G4S,RBCK1:NM_006462:exon3:c.G233A:p.R78Q,RBCK1:NM_001323956:exon4:c.G10A:p.G4S,RBCK1:NM_031229:exon4:c.G359A:p.R120Q	0.0002	23
19	18702922	19:18702922:A:G	A	G	0.000167392	2987	ADD	5.36406	2.31133	10.5982	0.00113201	exonic	REX1BD	.	nonsynonymous_SNV	REX1BD:NM_001100418:exon5:c.A538G:p.I180V,REX1BD:NM_001100419:exon5:c.A472G:p.I158V	6.665e-05	22.6
19	7523541	19:7523541:C:T	C	T	0.000167729	2981	ADD	5.36399	2.31129	10.5979	0.00113217	exonic	ARHGEF18	.	synonymous_SNV	ARHGEF18:NM_001130955:exon9:c.C1599T:p.N533N,ARHGEF18:NM_001367824:exon10:c.C1287T:p.N429N,ARHGEF18:NM_015318:exon10:c.C1287T:p.N429N,ARHGEF18:NM_001367823:exon19:c.C2325T:p.N775N	5.798e-05	6.649
19	57909985	19:57909985:CAT:C	CAT	C	0.000334784	2987	ADD	4.57444	2.06083	10.597	0.00113274	exonic	ZNF548	.	frameshift_deletion	ZNF548:NM_152909:exon3:c.331_332del:p.I113Lfs*2,ZNF548:NM_001172773:exon4:c.367_368del:p.I125Lfs*2	9.847e-05	17.91
19	51330387	19:51330387:G:A	G	A	0.000168634	2965	ADD	5.36349	2.311	10.5958	0.00113347	exonic	KLK15	.	synonymous_SNV	KLK15:NM_001277081:exon3:c.C225T:p.N75N,KLK15:NM_001277082:exon3:c.C225T:p.N75N,KLK15:NM_017509:exon3:c.C228T:p.N76N	3.33e-05	9.518
12	107279730	12:107279730:G:A	G	A	0.000339098	2949	ADD	5.06352	1.48564	10.5955	0.00113363	exonic	RIC8B	.	synonymous_SNV	RIC8B:NM_001351363:exon8:c.G1452A:p.T484T,RIC8B:NM_001330146:exon9:c.G1572A:p.T524T,RIC8B:NM_001351367:exon9:c.G1236A:p.T412T,RIC8B:NM_018157:exon9:c.G1500A:p.T500T,RIC8B:NM_001330145:exon10:c.G1620A:p.T540T,RIC8B:NM_001351362:exon10:c.G1476A:p.T492T,RIC8B:NM_001351366:exon10:c.G1356A:p.T452T,RIC8B:NM_001351361:exon11:c.G1596A:p.T532T	0.0002	9.635
9	27524375	9:27524375:T:C	T	C	0.000167336	2988	ADD	5.36724	2.3162	10.5914	0.00113614	exonic	IFNK	.	nonsynonymous_SNV	IFNK:NM_020124:exon1:c.T41C:p.L14P	0	3.54
9	101017485	9:101017485:G:A	G	A	0.000167448	2986	ADD	5.36722	2.31619	10.5914	0.00113616	exonic	TBC1D2	.	synonymous_SNV	TBC1D2:NM_001267571:exon1:c.C339T:p.I113I,TBC1D2:NM_018421:exon1:c.C339T:p.I113I	2.711e-05	14.73
9	124910475	9:124910475:G:A	G	A	0.000167504	2985	ADD	5.36723	2.31619	10.5914	0.00113616	exonic	NDUFA8	.	synonymous_SNV	NDUFA8:NM_001318195:exon3:c.C297T:p.H99H,NDUFA8:NM_014222:exon3:c.C297T:p.H99H	6.66e-05	10.27
9	334334	9:334334:T:G	T	G	0.000167392	2987	ADD	5.36718	2.31616	10.5912	0.00113629	exonic	DOCK8	.	nonsynonymous_SNV	DOCK8:NM_001190458:exon10:c.T1031G:p.F344C,DOCK8:NM_001193536:exon10:c.T1031G:p.F344C,DOCK8:NM_203447:exon11:c.T1235G:p.F412C	0	25.5
19	45316574	19:45316574:G:A	G	A	0.000171233	2920	ADD	5.36239	2.31036	10.5912	0.00113629	exonic	BCAM	.	nonsynonymous_SNV	BCAM:NM_001013257:exon5:c.G572A:p.R191H,BCAM:NM_005581:exon5:c.G572A:p.R191H	0.0002	0.56
11	124757299	11:124757299:G:A	G	A	0.00033456	2989	ADD	5.13306	1.5194	10.5881	0.0011382	exonic	ROBO4	.	nonsynonymous_SNV	ROBO4:NM_001301088:exon14:c.C1718T:p.P573L,ROBO4:NM_019055:exon14:c.C2153T:p.P718L	0.0129	17.03
2	167089942	2:167089942:G:C	G	C	0.00210822	2846	ADD	2.81792	0.740145	10.5758	0.0011458	exonic	SCN9A	.	nonsynonymous_SNV	SCN9A:NM_001365536:exon21:c.C3832G:p.L1278V,SCN9A:NM_002977:exon21:c.C3799G:p.L1267V	0.0031	24.2
6	152651417	6:152651417:C:T	C	T	0.000167336	2988	ADD	5.35655	2.31179	10.5744	0.00114665	exonic	SYNE1	.	synonymous_SNV	SYNE1:NM_033071:exon77:c.G14190A:p.Q4730Q,SYNE1:NM_182961:exon78:c.G14403A:p.Q4801Q	0	7.055
6	160230167	6:160230167:C:G	C	G	0.00016728	2989	ADD	5.35656	2.3118	10.5744	0.00114665	exonic	PNLDC1	.	nonsynonymous_SNV	PNLDC1:NM_001271862:exon9:c.C760G:p.Q254E,PNLDC1:NM_173516:exon9:c.C727G:p.Q243E	1.791e-05	23
6	90368371	6:90368371:T:C	T	C	0.000167392	2987	ADD	5.35654	2.31179	10.5744	0.00114667	exonic	MDN1	.	synonymous_SNV	MDN1:NM_014611:exon89:c.A14979G:p.E4993E	6.535e-05	0.114
6	129674460	6:129674460:G:A	G	A	0.000167392	2987	ADD	5.35654	2.31179	10.5744	0.00114667	exonic	LAMA2	.	nonsynonymous_SNV	LAMA2:NM_000426:exon32:c.G4675A:p.G1559S,LAMA2:NM_001079823:exon32:c.G4675A:p.G1559S	0.0002	22
6	26033562	6:26033562:T:C	T	C	0.000167392	2987	ADD	5.35652	2.31178	10.5743	0.00114673	exonic	HIST1H2AB	.	nonsynonymous_SNV	HIST1H2AB:NM_003513:exon1:c.A235G:p.I79V	0.0006	24.2
6	36442578	6:36442578:A:C	A	C	0.000167504	2985	ADD	5.35652	2.31178	10.5743	0.00114673	exonic	KCTD20	.	nonsynonymous_SNV	KCTD20:NM_173562:exon3:c.A173C:p.D58A	0	23
1	41223963	1:41223963:C:T	C	T	0.000167448	2986	ADD	5.36168	2.31889	10.574	0.00114689	exonic	NFYC	.	synonymous_SNV	NFYC:NM_001142589:exon5:c.C444T:p.G148G,NFYC:NM_001308114:exon5:c.C558T:p.G186G,NFYC:NM_001142587:exon6:c.C558T:p.G186G,NFYC:NM_001142588:exon6:c.C558T:p.G186G,NFYC:NM_001308115:exon6:c.C558T:p.G186G,NFYC:NM_014223:exon6:c.C558T:p.G186G,NFYC:NM_001142590:exon11:c.C558T:p.G186G	9.315e-06	12.37
1	42048230	1:42048230:G:A	G	A	0.000167336	2988	ADD	5.35732	2.31356	10.5729	0.00114755	exonic	HIVEP3	.	nonsynonymous_SNV	HIVEP3:NM_001127714:exon3:c.C2239T:p.R747W,HIVEP3:NM_024503:exon4:c.C2239T:p.R747W	0.0068	22.6
6	45296497	6:45296497:C:A	C	A	0.00016852	2967	ADD	5.35616	2.31157	10.5728	0.00114765	exonic	RUNX2	.	nonsynonymous_SNV	RUNX2:NM_001015051:exon2:c.C34A:p.P12T,RUNX2:NM_001024630:exon2:c.C34A:p.P12T	0	23.6
6	25972318	6:25972318:A:G	A	G	0.000168691	2964	ADD	5.35611	2.31154	10.5725	0.00114781	exonic	TRIM38	.	synonymous_SNV	TRIM38:NM_006355:exon5:c.A729G:p.K243K	1.792e-05	0.243
6	64408113	6:64408113:G:A	G	A	0.000171116	2922	ADD	5.3555	2.31118	10.57	0.0011494	exonic	PHF3	.	nonsynonymous_SNV	PHF3:NM_001370349:exon6:c.G2417A:p.G806D,PHF3:NM_001370350:exon6:c.G488A:p.G163D,PHF3:NM_015153:exon6:c.G2681A:p.G894D,PHF3:NM_001370348:exon7:c.G2681A:p.G894D,PHF3:NM_001290259:exon8:c.G2417A:p.G806D	0	29
6	101079055	6:101079055:C:T	C	T	0.000170532	2932	ADD	5.35547	2.31116	10.5699	0.00114948	exonic	ASCC3	.	nonsynonymous_SNV	ASCC3:NM_006828:exon26:c.G4157A:p.R1386H	6.677e-05	32
1	1289445	1:1289445:T:C	T	C	0.00016728	2989	ADD	5.35643	2.31305	10.5694	0.00114974	exonic	MXRA8	.	nonsynonymous_SNV	MXRA8:NM_001282584:exon7:c.A884G:p.D295G,MXRA8:NM_001282583:exon8:c.A1160G:p.D387G,MXRA8:NM_001282585:exon8:c.A1187G:p.D396G,MXRA8:NM_032348:exon8:c.A1187G:p.D396G,MXRA8:NM_001282582:exon9:c.A1187G:p.D396G	0.0003	23.9
1	15438988	1:15438988:G:A	G	A	0.00016728	2989	ADD	5.35643	2.31305	10.5694	0.00114974	exonic	KAZN	.	nonsynonymous_SNV	KAZN:NM_201628:exon14:c.G2114A:p.R705Q	0.0001	27.4
1	27949642	1:27949642:G:C	G	C	0.00016728	2989	ADD	5.35643	2.31305	10.5694	0.00114974	exonic	FGR	.	synonymous_SNV	FGR:NM_001042729:exon4:c.C240G:p.T80T,FGR:NM_001042747:exon4:c.C240G:p.T80T,FGR:NM_005248:exon4:c.C240G:p.T80T	0	10.78
1	44458216	1:44458216:C:G	C	G	0.00016728	2989	ADD	5.35643	2.31305	10.5694	0.00114974	exonic	CCDC24	.	synonymous_SNV	CCDC24:NM_001349128:exon3:c.C363G:p.V121V,CCDC24:NM_001349127:exon4:c.C324G:p.V108V,CCDC24:NM_152499:exon4:c.C324G:p.V108V	6.665e-05	9.521
1	147381079	1:147381079:G:C	G	C	0.00016728	2989	ADD	5.35643	2.31305	10.5694	0.00114974	exonic	GJA8	.	nonsynonymous_SNV	GJA8:NM_005267:exon2:c.G997C:p.G333R	0.0003	8.982
1	151825925	1:151825925:G:C	G	C	0.00016728	2989	ADD	5.35643	2.31305	10.5694	0.00114974	exonic	THEM5	.	nonsynonymous_SNV	THEM5:NM_182578:exon1:c.C117G:p.D39E	9.136e-06	9.522
1	153932786	1:153932786:C:G	C	G	0.000167392	2987	ADD	5.35643	2.31304	10.5694	0.00114977	exonic	SLC39A1	.	nonsynonymous_SNV	SLC39A1:NM_001271957:exon4:c.G763C:p.G255R,SLC39A1:NM_001271958:exon4:c.G763C:p.G255R,SLC39A1:NM_001271959:exon4:c.G763C:p.G255R,SLC39A1:NM_001271960:exon5:c.G763C:p.G255R,SLC39A1:NM_014437:exon5:c.G763C:p.G255R	8.992e-06	23.4
1	208269437	1:208269437:T:C	T	C	0.000167336	2988	ADD	5.3564	2.31303	10.5693	0.00114982	exonic	PLXNA2	.	nonsynonymous_SNV	PLXNA2:NM_025179:exon8:c.A1919G:p.K640R	0.001	22.1
1	216595629	1:216595629:A:G	A	G	0.000167336	2988	ADD	5.3564	2.31303	10.5693	0.00114982	exonic	USH2A	.	nonsynonymous_SNV	USH2A:NM_007123:exon2:c.T50C:p.I17T,USH2A:NM_206933:exon2:c.T50C:p.I17T	0	4.803
1	236966842	1:236966842:A:G	A	G	0.000167392	2987	ADD	5.35641	2.31303	10.5693	0.00114982	exonic	MTR	.	nonsynonymous_SNV	MTR:NM_000254:exon2:c.A149G:p.H50R,MTR:NM_001291939:exon2:c.A149G:p.H50R	8.955e-06	17.54
1	22446991	1:22446991:C:T	C	T	0.000167504	2985	ADD	5.35638	2.31301	10.5692	0.0011499	exonic	WNT4	.	nonsynonymous_SNV	WNT4:NM_030761:exon5:c.G608A:p.R203Q	0.0007	23.7
1	203025625	1:203025625:A:G	A	G	0.000167504	2985	ADD	5.35638	2.31301	10.5692	0.0011499	exonic	PPFIA4	.	synonymous_SNV	PPFIA4:NM_001304331:exon18:c.A2229G:p.E743E,PPFIA4:NM_001304332:exon18:c.A2229G:p.E743E	2.983e-05	6.963
1	85647963	1:85647963:T:G	T	G	0.00016756	2984	ADD	5.35636	2.313	10.5691	0.00114993	exonic	SYDE2	.	nonsynonymous_SNV	SYDE2:NM_032184:exon3:c.A2362C:p.I788L	0.0001	21.9
1	84679969	1:84679969:C:T	C	T	0.000167842	2979	ADD	5.35625	2.31294	10.5686	0.00115022	exonic	PRKACB	.	nonsynonymous_SNV	PRKACB:NM_001242862:exon8:c.C860T:p.T287M,PRKACB:NM_001242858:exon9:c.C863T:p.T288M,PRKACB:NM_002731:exon9:c.C899T:p.T300M,PRKACB:NM_182948:exon9:c.C1040T:p.T347M,PRKACB:NM_001242861:exon10:c.C809T:p.T270M,PRKACB:NM_001242859:exon11:c.C911T:p.T304M,PRKACB:NM_001242857:exon12:c.C920T:p.T307M,PRKACB:NM_001242860:exon12:c.C917T:p.T306M	0.0039	24.6
16	3790430	16:3790430:G:A	G	A	0.000167336	2988	ADD	5.35329	2.31138	10.5664	0.00115162	exonic	CREBBP	.	nonsynonymous_SNV	CREBBP:NM_001079846:exon23:c.C3989T:p.T1330M,CREBBP:NM_004380:exon24:c.C4103T:p.T1368M	0.0006	24.2
16	19127348	16:19127348:C:G	C	G	0.000167448	2986	ADD	5.35328	2.31137	10.5663	0.00115165	exonic	ITPRIPL2	.	nonsynonymous_SNV	ITPRIPL2:NM_001034841:exon1:c.C1565G:p.P522R	0	25.8
16	19127378	16:19127378:A:C	A	C	0.000167392	2987	ADD	5.35328	2.31138	10.5664	0.00115165	exonic	ITPRIPL2	.	nonsynonymous_SNV	ITPRIPL2:NM_001034841:exon1:c.A1595C:p.E532A	0	23.1
16	21117901	16:21117901:A:T	A	T	0.000167392	2987	ADD	5.35328	2.31138	10.5664	0.00115165	exonic	DNAH3	.	nonsynonymous_SNV	DNAH3:NM_001347886:exon15:c.T2014A:p.S672T,DNAH3:NM_017539:exon15:c.T2194A:p.S732T	8.966e-06	17.02
16	21213055	16:21213055:T:G	T	G	0.000167392	2987	ADD	5.35328	2.31138	10.5664	0.00115165	exonic	ZP2	.	synonymous_SNV	ZP2:NM_001290104:exon14:c.A1449C:p.P483P,ZP2:NM_003460:exon14:c.A1476C:p.P492P	0	7.61
16	89704092	16:89704092:T:C	T	C	0.000167448	2986	ADD	5.35327	2.31137	10.5663	0.00115168	exonic	DPEP1	.	synonymous_SNV	DPEP1:NM_001128141:exon9:c.T906C:p.G302G,DPEP1:NM_004413:exon9:c.T906C:p.G302G	2.694e-05	6.488
16	67262994	16:67262994:G:A	G	A	0.000167448	2986	ADD	5.35325	2.31136	10.5662	0.00115173	exonic	TMEM208	.	nonsynonymous_SNV	TMEM208:NM_001318217:exon6:c.G290A:p.R97Q,TMEM208:NM_014187:exon6:c.G500A:p.R167Q	6.674e-05	23.7
11	722413	11:722413:T:C	T	C	0.00016728	2989	ADD	5.36326	2.31964	10.5661	0.00115178	exonic	EPS8L2	.	nonsynonymous_SNV	EPS8L2:NM_022772:exon13:c.T1072C:p.C358R	0.0002	25
11	1018658	11:1018658:C:T	C	T	0.00016728	2989	ADD	5.36326	2.31964	10.5661	0.00115178	exonic	MUC6	.	synonymous_SNV	MUC6:NM_005961:exon31:c.G4143A:p.T1381T	0.0001	2.03
11	124742304	11:124742304:C:T	C	T	0.00016728	2989	ADD	5.36326	2.31964	10.5661	0.00115178	exonic	ROBO3	.	stopgain	ROBO3:NM_022370:exon8:c.C1186T:p.Q396X	8.951e-06	39
16	3168994	16:3168994:G:C	G	C	0.00016756	2984	ADD	5.35324	2.31135	10.5662	0.00115178	exonic	ZNF205	.	nonsynonymous_SNV	ZNF205:NM_001042428:exon6:c.G573C:p.K191N,ZNF205:NM_001278158:exon6:c.G573C:p.K191N,ZNF205:NM_003456:exon6:c.G573C:p.K191N	0.0001	8.771
11	124743977	11:124743977:G:C	G	C	0.000167336	2988	ADD	5.36325	2.31963	10.5661	0.00115181	exonic	ROBO3	.	nonsynonymous_SNV	ROBO3:NM_022370:exon12:c.G1796C:p.G599A	8.066e-05	27
16	53860319	16:53860319:A:G	A	G	0.000167616	2983	ADD	5.35321	2.31134	10.5661	0.00115181	exonic	FTO	.	nonsynonymous_SNV	FTO:NM_001363897:exon2:c.A589G:p.M197V,FTO:NM_001080432:exon3:c.A667G:p.M223V,FTO:NM_001363891:exon3:c.A667G:p.M223V,FTO:NM_001363894:exon3:c.A667G:p.M223V,FTO:NM_001363896:exon3:c.A667G:p.M223V,FTO:NM_001363898:exon3:c.A667G:p.M223V,FTO:NM_001363899:exon3:c.A667G:p.M223V,FTO:NM_001363900:exon3:c.A667G:p.M223V,FTO:NM_001363901:exon3:c.A667G:p.M223V,FTO:NM_001363903:exon3:c.A667G:p.M223V,FTO:NM_00…	5.439e-05	25.4
11	6290909	11:6290909:G:T	G	T	0.000167392	2987	ADD	5.36323	2.31962	10.566	0.00115186	exonic	CCKBR	.	synonymous_SNV	CCKBR:NM_001363552:exon2:c.G162T:p.L54L,CCKBR:NM_176875:exon2:c.G162T:p.L54L	0.0002	11.08
11	74618257	11:74618257:T:C	T	C	0.000167504	2985	ADD	5.36322	2.31962	10.566	0.00115186	exonic	XRRA1	.	nonsynonymous_SNV	XRRA1:NM_001270380:exon9:c.A694G:p.T232A,XRRA1:NM_182969:exon9:c.A694G:p.T232A	0	23.3
11	563240	11:563240:C:A	C	A	0.000167448	2986	ADD	5.36319	2.3196	10.5658	0.00115197	exonic	RASSF7	.	nonsynonymous_SNV	RASSF7:NM_001143993:exon4:c.C874A:p.L292M,RASSF7:NM_001143994:exon4:c.C874A:p.L292M,RASSF7:NM_003475:exon4:c.C874A:p.L292M	0.0002	23.7
11	59271196	11:59271196:A:T	A	T	0.000167392	2987	ADD	5.36318	2.3196	10.5659	0.00115197	exonic	OR4D11	.	nonsynonymous_SNV	OR4D11:NM_001004706:exon1:c.A148T:p.T50S	0.0002	16.03
11	70013431	11:70013431:G:A	G	A	0.000167448	2986	ADD	5.36318	2.31959	10.5658	0.00115197	exonic	ANO1	.	nonsynonymous_SNV	ANO1:NM_018043:exon21:c.G2135A:p.R712Q	8.968e-05	16.88
11	57258819	11:57258819:G:A	G	A	0.000167448	2986	ADD	5.36317	2.31959	10.5658	0.00115199	exonic	SLC43A1	.	synonymous_SNV	SLC43A1:NM_001198810:exon11:c.C1071T:p.S357S,SLC43A1:NM_003627:exon11:c.C1071T:p.S357S	0.0007	10.94
11	63057733	11:63057733:C:T	C	T	0.000167448	2986	ADD	5.36318	2.31959	10.5658	0.00115199	exonic	SLC22A10	.	synonymous_SNV	SLC22A10:NM_001039752:exon1:c.C96T:p.I32I	0	0.264
11	58980271	11:58980271:G:A	G	A	0.000167504	2985	ADD	5.36315	2.31958	10.5657	0.00115205	exonic	MPEG1	.	nonsynonymous_SNV	MPEG1:NM_001039396:exon1:c.C68T:p.S23L	0.0006	0.244
14	50559361	14:50559361:T:G	T	G	0.000167336	2988	ADD	5.35284	2.3114	10.5654	0.00115226	ncRNA_intronic	LINC01599	.	.	.	0	0.165
14	73720462	14:73720462:C:A	C	A	0.000167392	2987	ADD	5.35284	2.3114	10.5653	0.00115229	exonic	PAPLN	.	synonymous_SNV	PAPLN:NM_001365906:exon11:c.C1095A:p.R365R,PAPLN:NM_001365907:exon11:c.C1095A:p.R365R,PAPLN:NM_173462:exon11:c.C1014A:p.R338R	9.372e-06	13.2
14	105221992	14:105221992:C:T	C	T	0.000167336	2988	ADD	5.35283	2.3114	10.5653	0.00115229	exonic	SIVA1	.	synonymous_SNV	SIVA1:NM_006427:exon2:c.C144T:p.L48L	0.0002	5.341
14	74727334	14:74727334:G:A	G	A	0.000167336	2988	ADD	5.35281	2.31138	10.5652	0.00115234	exonic	VSX2	.	synonymous_SNV	VSX2:NM_182894:exon5:c.G798A:p.S266S	0.0004	9.862
11	17464413	11:17464413:C:T	C	T	0.000167785	2980	ADD	5.36301	2.3195	10.5652	0.00115239	exonic	ABCC8	.	nonsynonymous_SNV	ABCC8:NM_000352:exon10:c.G1484A:p.R495Q,ABCC8:NM_001287174:exon10:c.G1484A:p.R495Q,ABCC8:NM_001351295:exon10:c.G1484A:p.R495Q,ABCC8:NM_001351296:exon10:c.G1481A:p.R494Q,ABCC8:NM_001351297:exon10:c.G1481A:p.R494Q	3.249e-05	32
14	20665776	14:20665776:C:T	C	T	0.000168124	2974	ADD	5.35259	2.31125	10.5643	0.0011529	exonic	OR11G2	.	synonymous_SNV	OR11G2:NM_001005503:exon1:c.C282T:p.H94H	0.0003	8.599
11	6962846	11:6962846:G:A	G	A	0.00016909	2957	ADD	5.36277	2.31935	10.5641	0.00115305	exonic	ZNF215	.	nonsynonymous_SNV	ZNF215:NM_001354854:exon3:c.G445A:p.E149K,ZNF215:NM_001354853:exon4:c.G445A:p.E149K,ZNF215:NM_013250:exon4:c.G445A:p.E149K	6.268e-05	14.84
1	9833388	1:9833388:G:A	G	A	0.00016728	2989	ADD	5.35903	2.31735	10.5634	0.00115348	exonic	CLSTN1	.	synonymous_SNV	CLSTN1:NM_001009566:exon2:c.C156T:p.T52T,CLSTN1:NM_001302883:exon2:c.C156T:p.T52T,CLSTN1:NM_014944:exon2:c.C156T:p.T52T	1.793e-05	0.902
1	182026886	1:182026886:G:A	G	A	0.00016728	2989	ADD	5.35903	2.31735	10.5634	0.00115348	exonic	ZNF648	.	nonsynonymous_SNV	ZNF648:NM_001009992:exon2:c.C260T:p.A87V	0.0003	11.7
1	197887001	1:197887001:C:T	C	T	0.00016728	2989	ADD	5.35903	2.31735	10.5634	0.00115348	exonic	LHX9	.	synonymous_SNV	LHX9:NM_001370213:exon1:c.C48T:p.R16R,LHX9:NM_020204:exon1:c.C48T:p.R16R	0.0005	15.1
1	248185966	1:248185966:C:A	C	A	0.000167336	2988	ADD	5.35902	2.31734	10.5634	0.00115351	exonic	OR2L5	.	synonymous_SNV	OR2L5:NM_001258284:exon1:c.C717A:p.T239T	0.0002	0.28
1	151861849	1:151861849:T:C	T	C	0.000167336	2988	ADD	5.35902	2.31734	10.5633	0.00115353	exonic	THEM4	.	nonsynonymous_SNV	THEM4:NM_053055:exon3:c.A287G:p.D96G	0	6.814
1	203022999	1:203022999:C:T	C	T	0.000167336	2988	ADD	5.35901	2.31734	10.5633	0.00115353	exonic	PPFIA4	.	nonsynonymous_SNV	PPFIA4:NM_001304331:exon15:c.C1739T:p.A580V,PPFIA4:NM_001304332:exon15:c.C1739T:p.A580V	8.598e-05	9.272
1	209811910	1:209811910:G:A	G	A	0.000167392	2987	ADD	5.35899	2.31733	10.5632	0.00115361	exonic	LAMB3	.	synonymous_SNV	LAMB3:NM_001017402:exon3:c.C267T:p.S89S,LAMB3:NM_000228:exon4:c.C267T:p.S89S,LAMB3:NM_001127641:exon4:c.C267T:p.S89S	0.0022	0.241
14	59931611	14:59931611:G:A	G	A	0.000168748	2963	ADD	5.35229	2.31108	10.5631	0.00115369	exonic	GPR135	.	nonsynonymous_SNV	GPR135:NM_022571:exon1:c.C334T:p.L112F	2.072e-05	18.75
1	33429731	1:33429731:G:C	G	C	0.000167898	2978	ADD	5.35884	2.31724	10.5626	0.00115398	exonic	RNF19B	.	nonsynonymous_SNV	RNF19B:NM_001127361:exon1:c.C556G:p.H186D,RNF19B:NM_001300826:exon1:c.C556G:p.H186D,RNF19B:NM_153341:exon1:c.C556G:p.H186D	0.0003	20.5
19	56539356	19:56539356:G:C	G	C	0.00016728	2989	ADD	5.3587	2.31734	10.5624	0.00115409	exonic	NLRP5	.	nonsynonymous_SNV	NLRP5:NM_153447:exon7:c.G1757C:p.S586T	0.0007	22.3
19	57839257	19:57839257:C:T	C	T	0.000167392	2987	ADD	5.35868	2.31733	10.5624	0.00115412	exonic	ZNF543	.	nonsynonymous_SNV	ZNF543:NM_213598:exon4:c.C427T:p.R143W	0.0041	11.97
19	14591536	19:14591536:C:T	C	T	0.000167392	2987	ADD	5.35868	2.31732	10.5624	0.00115414	exonic	GIPC1	.	nonsynonymous_SNV	GIPC1:NM_202494:exon2:c.G52A:p.G18S,GIPC1:NM_202469:exon3:c.G52A:p.G18S,GIPC1:NM_202470:exon3:c.G343A:p.G115S,GIPC1:NM_202468:exon4:c.G343A:p.G115S,GIPC1:NM_005716:exon5:c.G343A:p.G115S	6.668e-05	22.9
19	17091483	19:17091483:GCTT:G	GCTT	G	0.000167392	2987	ADD	5.35868	2.31732	10.5624	0.00115414	exonic	CPAMD8	.	nonframeshift_deletion	CPAMD8:NM_015692:exon14:c.1406_1408del:p.E469del	0.0002	16.66
19	19746462	19:19746462:G:A	G	A	0.000167448	2986	ADD	5.35867	2.31732	10.5623	0.00115414	exonic	GMIP	.	stopgain	GMIP:NM_016573:exon14:c.C1396T:p.R466X	2.978e-05	38
19	49671547	19:49671547:C:T	C	T	0.000167448	2986	ADD	5.35867	2.31732	10.5623	0.00115414	exonic	TRPM4	.	nonsynonymous_SNV	TRPM4:NM_001195227:exon5:c.C479T:p.T160M,TRPM4:NM_017636:exon5:c.C479T:p.T160M	0.0012	12.77
19	42857963	19:42857963:C:T	C	T	0.000167504	2985	ADD	5.35866	2.31732	10.5623	0.00115417	exonic	MEGF8	.	synonymous_SNV	MEGF8:NM_001410:exon21:c.C3597T:p.R1199R,MEGF8:NM_001271938:exon22:c.C3798T:p.R1266R	0.0004	0.233
1	3385463	1:3385463:T:TG	T	TG	0.000168294	2971	ADD	5.35863	2.31711	10.5617	0.00115452	exonic	ARHGEF16	.	frameshift_insertion	ARHGEF16:NM_014448:exon5:c.825dupG:p.D276Gfs*6	0	32
20	48744531	20:48744531:G:T	G	T	0.00033456	2989	ADD	4.92525	1.42909	10.5613	0.00115478	exonic	TMEM189\x3bTMEM189-UBE2V1	.	synonymous_SNV	TMEM189:NM_001162505:exon5:c.C663A:p.T221T,TMEM189:NM_199129:exon5:c.C672A:p.T224T,TMEM189-UBE2V1:NM_199203:exon5:c.C672A:p.T224T	6.67e-05	10.81
14	39716181	14:39716181:G:T	G	T	0.000170648	2930	ADD	5.35152	2.31063	10.56	0.00115563	exonic	MIA2	.	nonsynonymous_SNV	MIA2:NM_001329214:exon4:c.G403T:p.G135C,MIA2:NM_054024:exon4:c.G403T:p.G135C	0	13.92
19	814892	19:814892:G:A	G	A	0.000170184	2938	ADD	5.35759	2.31669	10.5579	0.00115694	exonic	PLPPR3	.	nonsynonymous_SNV	PLPPR3:NM_001270366:exon5:c.C593T:p.S198F,PLPPR3:NM_024888:exon5:c.C593T:p.S198F	6.679e-05	28.3
8	9413893	8:9413893:G:A	G	A	0.00133824	2989	ADD	3.18405	0.899875	10.5563	0.00115792	exonic	TNKS	.	synonymous_SNV	TNKS:NM_003747:exon1:c.G444A:p.S148S	0.0738	15.24
17	45419343	17:45419343:A:C	A	C	0.000167785	2980	ADD	5.35369	2.31793	10.5517	0.00116078	exonic	EFCAB13	.	nonsynonymous_SNV	EFCAB13:NM_001195192:exon6:c.A248C:p.E83A,EFCAB13:NM_152347:exon6:c.A248C:p.E83A	0	0.002
19	3179062	19:3179062:G:C	G	C	0.00017507	2856	ADD	5.35597	2.31574	10.5512	0.00116113	exonic	S1PR4	.	nonsynonymous_SNV	S1PR4:NM_003775:exon1:c.G272C:p.S91T	0	24.7
19	40478452	19:40478452:C:T	C	T	0.000175193	2854	ADD	5.3557	2.31559	10.5501	0.0011618	exonic	PSMC4	.	synonymous_SNV	PSMC4:NM_006503:exon3:c.C312T:p.G104G,PSMC4:NM_153001:exon3:c.C219T:p.G73G	0.0055	9.899
2	152490427	2:152490427:C:T	C	T	0.000167392	2987	ADD	5.35296	2.31651	10.5473	0.00116359	exonic	NEB	.	nonsynonymous_SNV	NEB:NM_001164507:exon65:c.G9155A:p.R3052Q,NEB:NM_001164508:exon65:c.G9155A:p.R3052Q,NEB:NM_001271208:exon65:c.G9155A:p.R3052Q	0.0072	24
2	106694269	2:106694269:C:T	C	T	0.000167504	2985	ADD	5.35294	2.3165	10.5472	0.00116362	exonic	ECRG4	.	nonsynonymous_SNV	ECRG4:NM_032411:exon4:c.C334T:p.H112Y	0.0002	23.1
2	97017679	2:97017679:C:T	C	T	0.000167392	2987	ADD	5.35294	2.3165	10.5472	0.00116364	exonic	NCAPH	.	synonymous_SNV	NCAPH:NM_001281712:exon6:c.C423T:p.P141P,NCAPH:NM_001281710:exon7:c.C798T:p.P266P,NCAPH:NM_001281711:exon7:c.C759T:p.P253P,NCAPH:NM_015341:exon7:c.C831T:p.P277P	0.0002	4.049
2	149248058	2:149248058:C:T	C	T	0.000167392	2987	ADD	5.35294	2.3165	10.5472	0.00116364	exonic	MBD5	.	synonymous_SNV	MBD5:NM_018328:exon12:c.C4158T:p.G1386G	0.0012	9.962
2	170605969	2:170605969:C:G	C	G	0.000167504	2985	ADD	5.35294	2.3165	10.5472	0.00116364	exonic	KLHL23\x3bPHOSPHO2-KLHL23	.	synonymous_SNV	KLHL23:NM_144711:exon4:c.C1404G:p.L468L,PHOSPHO2-KLHL23:NM_001199290:exon6:c.C1404G:p.L468L	0.0002	9.726
2	207611034	2:207611034:G:A	G	A	0.000167504	2985	ADD	5.35293	2.31649	10.5472	0.00116367	exonic	MDH1B	.	stopgain	MDH1B:NM_001330223:exon7:c.C1039T:p.R347X,MDH1B:NM_001330225:exon7:c.C859T:p.R287X,MDH1B:NM_001330226:exon7:c.C1039T:p.R347X,MDH1B:NM_001039845:exon8:c.C1333T:p.R445X,MDH1B:NM_001282940:exon8:c.C1333T:p.R445X,MDH1B:NM_001330224:exon8:c.C859T:p.R287X	0.0001	35
2	183703247	2:183703247:G:T	G	T	0.000167729	2981	ADD	5.35288	2.31646	10.547	0.0011638	exonic	FRZB	.	nonsynonymous_SNV	FRZB:NM_001463:exon4:c.C687A:p.N229K	3.596e-05	23.7
2	190611307	2:190611307:T:C	T	C	0.000167729	2981	ADD	5.35287	2.31646	10.5469	0.0011638	exonic	ANKAR	.	nonsynonymous_SNV	ANKAR:NM_144708:exon23:c.T4259C:p.L1420P	0.0046	24.9
2	207613909	2:207613909:T:C	T	C	0.000167785	2980	ADD	5.35285	2.31645	10.5469	0.00116386	splicing	MDH1B	NM_001330224:exon7:c.579-2A>G\x3bNM_001039845:exon7:c.1053-2A>G\x3bNM_001330223:exon6:c.759-2A>G\x3bNM_001282940:exon7:c.1053-2A>G\x3bNM_001330225:exon6:c.579-2A>G\x3bNM_001330226:exon6:c.759-2A>G	.	.	6.294e-05	33
2	220420975	2:220420975:C:T	C	T	0.000167504	2985	ADD	5.35282	2.31643	10.5467	0.00116397	exonic	OBSL1	.	nonsynonymous_SNV	OBSL1:NM_001173431:exon14:c.G4376A:p.R1459Q,OBSL1:NM_015311:exon14:c.G4376A:p.R1459Q	0.0005	24
2	179437308	2:179437308:G:A	G	A	0.000168011	2976	ADD	5.35279	2.31641	10.5466	0.00116402	exonic	TTN	.	synonymous_SNV	TTN:NM_003319:exon154:c.C46356T:p.L15452L,TTN:NM_133432:exon155:c.C46731T:p.L15577L,TTN:NM_133437:exon155:c.C46932T:p.L15644L,TTN:NM_133378:exon275:c.C65847T:p.L21949L,TTN:NM_001256850:exon276:c.C68628T:p.L22876L,TTN:NM_001267550:exon326:c.C73551T:p.L24517L	0	0.001
2	201436428	2:201436428:T:C	T	C	0.00016835	2970	ADD	5.35271	2.31636	10.5463	0.00116423	exonic	SGO2	.	synonymous_SNV	SGO2:NM_001160033:exon7:c.T1359C:p.N453N,SGO2:NM_001160046:exon7:c.T1359C:p.N453N,SGO2:NM_152524:exon7:c.T1359C:p.N453N	0	0.908
2	220404757	2:220404757:T:C	T	C	0.000169722	2946	ADD	5.35208	2.31599	10.5437	0.00116587	exonic	CHPF	.	nonsynonymous_SNV	CHPF:NM_001195731:exon4:c.A1190G:p.H397R,CHPF:NM_024536:exon4:c.A1676G:p.H559R	0.0005	17.46
17	40717061	17:40717061:A:G	A	G	0.000167336	2988	ADD	5.35129	2.31654	10.5423	0.00116673	exonic	COASY	.	nonsynonymous_SNV	COASY:NM_025233:exon5:c.A1298G:p.N433S,COASY:NM_001042529:exon6:c.A1298G:p.N433S,COASY:NM_001042532:exon7:c.A1385G:p.N462S	2.978e-05	23.8
17	45016066	17:45016066:G:A	G	A	0.00016728	2989	ADD	5.3513	2.31654	10.5423	0.00116673	exonic	GOSR2	.	nonsynonymous_SNV	GOSR2:NM_001321134:exon5:c.G384A:p.M128I,GOSR2:NM_001330252:exon5:c.G438A:p.M146I,GOSR2:NM_001353115:exon5:c.G435A:p.M145I,GOSR2:NM_001353116:exon5:c.G435A:p.M145I,GOSR2:NM_001321133:exon6:c.G579A:p.M193I,GOSR2:NM_001353114:exon6:c.G576A:p.M192I,GOSR2:NM_001363851:exon6:c.G525A:p.M175I,GOSR2:NM_004287:exon6:c.G579A:p.M193I,GOSR2:NM_054022:exon6:c.G579A:p.M193I	2.978e-05	23.2
17	63526193	17:63526193:C:T	C	T	0.00016728	2989	ADD	5.3513	2.31654	10.5423	0.00116673	exonic	AXIN2	.	synonymous_SNV	AXIN2:NM_001363813:exon10:c.G2238A:p.E746E,AXIN2:NM_004655:exon11:c.G2433A:p.E811E	0.0002	10.07
17	63554536	17:63554536:C:T	C	T	0.00016728	2989	ADD	5.3513	2.31654	10.5423	0.00116673	exonic	AXIN2	.	nonsynonymous_SNV	AXIN2:NM_001363813:exon2:c.G203A:p.R68Q,AXIN2:NM_004655:exon2:c.G203A:p.R68Q	0.0003	26.2
17	80402350	17:80402350:G:A	G	A	0.00016728	2989	ADD	5.3513	2.31654	10.5423	0.00116673	exonic	CYBC1	.	nonsynonymous_SNV	CYBC1:NM_001100408:exon5:c.C374T:p.T125M,CYBC1:NM_001033046:exon6:c.C416T:p.T139M,CYBC1:NM_001193654:exon6:c.C416T:p.T139M,CYBC1:NM_001193655:exon6:c.C416T:p.T139M,CYBC1:NM_001100407:exon7:c.C416T:p.T139M,CYBC1:NM_001193653:exon7:c.C416T:p.T139M,CYBC1:NM_001193657:exon7:c.C416T:p.T139M	0.0005	26.8
17	12916546	17:12916546:T:G	T	G	0.000167392	2987	ADD	5.35129	2.31654	10.5423	0.00116676	exonic	ELAC2	.	synonymous_SNV	ELAC2:NM_001165962:exon6:c.A537C:p.T179T,ELAC2:NM_018127:exon6:c.A537C:p.T179T,ELAC2:NM_173717:exon6:c.A537C:p.T179T	0.0002	1.665
17	17174280	17:17174280:C:T	C	T	0.000167448	2986	ADD	5.35128	2.31654	10.5423	0.00116676	exonic	COPS3	.	synonymous_SNV	COPS3:NM_001316356:exon2:c.G27A:p.T9T,COPS3:NM_001199125:exon3:c.G168A:p.T56T,COPS3:NM_001316355:exon3:c.G228A:p.T76T,COPS3:NM_003653:exon3:c.G228A:p.T76T	8.954e-06	9.752
17	68172182	17:68172182:G:A	G	A	0.000167448	2986	ADD	5.35127	2.31653	10.5422	0.00116678	exonic	KCNJ2	.	synonymous_SNV	KCNJ2:NM_000891:exon2:c.G1002A:p.K334K	0.0001	8.758
17	7462431	17:7462431:G:A	G	A	0.000167504	2985	ADD	5.35127	2.31653	10.5422	0.00116681	exonic	TNFSF13	.	synonymous_SNV	TNFSF13:NM_001198622:exon1:c.G75A:p.P25P,TNFSF13:NM_001198623:exon1:c.G75A:p.P25P,TNFSF13:NM_003808:exon1:c.G75A:p.P25P,TNFSF13:NM_172087:exon1:c.G75A:p.P25P,TNFSF13:NM_172088:exon1:c.G75A:p.P25P,TNFSF13:NM_001198624:exon2:c.G24A:p.P8P	0.0007	11.86
17	62492990	17:62492990:A:G	A	G	0.000167448	2986	ADD	5.35123	2.31651	10.542	0.00116689	exonic	POLG2	.	synonymous_SNV	POLG2:NM_007215:exon1:c.T97C:p.L33L	0	4.702
17	17701179	17:17701179:G:A	G	A	0.00016756	2984	ADD	5.35121	2.31649	10.542	0.00116694	exonic	RAI1	.	synonymous_SNV	RAI1:NM_030665:exon3:c.G4917A:p.S1639S	6.686e-05	0.005
17	26370222	17:26370222:C:G	C	G	0.000167448	2986	ADD	5.35121	2.31649	10.542	0.00116694	exonic	NLK	.	nonsynonymous_SNV	NLK:NM_016231:exon1:c.C323G:p.A108G	1.791e-05	22.5
17	32956132	17:32956132:G:A	G	A	0.000167392	2987	ADD	5.35121	2.31649	10.542	0.00116694	exonic	TMEM132E	.	nonsynonymous_SNV	TMEM132E:NM_001304438:exon4:c.G1247A:p.R416H	0.0002	23.8
17	33318071	17:33318071:G:C	G	C	0.000167392	2987	ADD	5.35121	2.31649	10.542	0.00116694	exonic	LIG3	.	nonsynonymous_SNV	LIG3:NM_002311:exon5:c.G979C:p.V327L,LIG3:NM_013975:exon5:c.G979C:p.V327L	0.005	23.2
6	30514518	6:30514518:G:A	G	A	0.000335008	2985	ADD	4.9356	1.43629	10.5419	0.00116697	exonic	GNL1	.	nonsynonymous_SNV	GNL1:NM_005275:exon11:c.C1537T:p.R513C	0.0001	25.8
17	46134437	17:46134437:G:T	G	T	0.000167673	2982	ADD	5.3512	2.31649	10.5419	0.00116697	exonic	NFE2L1	.	nonsynonymous_SNV	NFE2L1:NM_001330261:exon4:c.G734T:p.C245F,NFE2L1:NM_003204:exon4:c.G767T:p.C256F	4.492e-05	23.3
6	34838672	6:34838672:A:G	A	G	0.000335233	2983	ADD	4.93558	1.43629	10.5418	0.00116708	exonic	UHRF1BP1	.	nonsynonymous_SNV	UHRF1BP1:NM_017754:exon18:c.A3760G:p.I1254V	0.0008	8.189
6	43401090	6:43401090:C:T	C	T	0.00033557	2980	ADD	4.93759	1.43739	10.5415	0.00116727	exonic	ABCC10	.	nonsynonymous_SNV	ABCC10:NM_033450:exon1:c.C1243T:p.R415W,ABCC10:NM_001198934:exon3:c.C1372T:p.R458W,ABCC10:NM_001350518:exon3:c.C40T:p.R14W	0.0009	25.2
17	45056040	17:45056040:C:G	C	G	0.000167898	2978	ADD	5.35101	2.31638	10.5411	0.00116748	exonic	RPRML	.	nonsynonymous_SNV	RPRML:NM_203400:exon1:c.G334C:p.V112L	0.0001	26.2
11	72470301	11:72470301:G:A	G	A	0.000334672	2988	ADD	4.887	1.41543	10.5408	0.0011677	exonic	STARD10	.	synonymous_SNV	STARD10:NM_006645:exon3:c.C333T:p.N111N	0.0008	10.61
17	67273806	17:67273806:C:T	C	T	0.000168976	2959	ADD	5.35083	2.31627	10.5404	0.00116791	exonic	ABCA5	.	nonsynonymous_SNV	ABCA5:NM_018672:exon18:c.G2570A:p.R857H,ABCA5:NM_172232:exon19:c.G2570A:p.R857H	0.0006	24.6
2	167760312	2:167760312:T:C	T	C	0.00016756	2984	ADD	5.34442	2.31137	10.5402	0.00116807	exonic	XIRP2	.	nonsynonymous_SNV	XIRP2:NM_001079810:exon2:c.T320C:p.I107T,XIRP2:NM_001199143:exon2:c.T320C:p.I107T,XIRP2:NM_152381:exon2:c.T320C:p.I107T	0	19.99
2	180409563	2:180409563:A:C	A	C	0.00016756	2984	ADD	5.34442	2.31137	10.5401	0.0011681	exonic	ZNF385B	.	nonsynonymous_SNV	ZNF385B:NM_001113397:exon2:c.T159G:p.N53K,ZNF385B:NM_001113398:exon2:c.T81G:p.N27K,ZNF385B:NM_001352812:exon2:c.T144G:p.N48K,ZNF385B:NM_001352813:exon2:c.T81G:p.N27K,ZNF385B:NM_001352814:exon2:c.T81G:p.N27K,ZNF385B:NM_001352815:exon3:c.T81G:p.N27K,ZNF385B:NM_001282725:exon4:c.T81G:p.N27K,ZNF385B:NM_001352810:exon4:c.T432G:p.N144K,ZNF385B:NM_001352811:exon4:c.T432G:p.N144K,ZNF385B:NM_152520:exon4:…	0	25
2	27746150	2:27746150:C:A	C	A	0.000167616	2983	ADD	5.34441	2.31136	10.5401	0.00116813	exonic	GCKR	.	synonymous_SNV	GCKR:NM_001486:exon19:c.C1722A:p.A574A	0	4.26
2	120692394	2:120692394:G:A	G	A	0.000167729	2981	ADD	5.34436	2.31134	10.5399	0.00116823	exonic	PTPN4	.	synonymous_SNV	PTPN4:NM_002830:exon15:c.G1215A:p.T405T	0.0002	9.22
2	234602495	2:234602495:G:C	G	C	0.000167504	2985	ADD	5.34431	2.31131	10.5397	0.00116837	exonic	UGT1A6	.	nonsynonymous_SNV	UGT1A6:NM_001072:exon1:c.G845C:p.R282T,UGT1A6:NM_205862:exon2:c.G44C:p.R15T	6.663e-05	0.001
2	210574801	2:210574801:C:A	C	A	0.000167842	2979	ADD	5.34424	2.31127	10.5394	0.00116856	exonic	MAP2	.	synonymous_SNV	MAP2:NM_001363913:exon9:c.C828A:p.P276P,MAP2:NM_031845:exon9:c.C828A:p.P276P,MAP2:NM_031847:exon9:c.C828A:p.P276P,MAP2:NM_001039538:exon11:c.C999A:p.P333P,MAP2:NM_001363911:exon12:c.C4884A:p.P1628P,MAP2:NM_002374:exon12:c.C4896A:p.P1632P,MAP2:NM_001363910:exon13:c.C4884A:p.P1628P	6.672e-05	5.104
4	115767141	4:115767141:A:G	A	G	0.000335008	2985	ADD	5.19328	1.55846	10.5371	0.00117004	exonic	NDST4	.	synonymous_SNV	NDST4:NM_022569:exon10:c.T1953C:p.F651F	9.927e-05	10.47
2	101188179	2:101188179:A:G	A	G	0.000170532	2932	ADD	5.34325	2.31069	10.5353	0.00117114	exonic	PDCL3	.	nonsynonymous_SNV	PDCL3:NM_024065:exon5:c.A496G:p.I166V	8.954e-06	7.515
11	63988045	11:63988045:G:A	G	A	0.0519203	2812	ADD	0.997454	0.270484	10.5328	0.00117274	exonic	FERMT3	.	synonymous_SNV	FERMT3:NM_031471:exon12:c.G1449A:p.P483P,FERMT3:NM_178443:exon12:c.G1461A:p.P487P	0.5082	0.011
17	80332587	17:80332587:G:A	G	A	0.000336134	2975	ADD	4.90624	1.42563	10.5305	0.00117417	exonic	UTS2R	.	synonymous_SNV	UTS2R:NM_018949:exon1:c.G387A:p.L129L	0.0007	10.34
9	139264800	9:139264800:G:A	G	A	0.000338295	2956	ADD	4.88396	1.41553	10.5299	0.00117455	exonic	CARD9	.	synonymous_SNV	CARD9:NM_052813:exon6:c.C897T:p.N299N,CARD9:NM_052814:exon6:c.C897T:p.N299N	0.0001	8.819
17	49357759	17:49357759:C:T	C	T	0.00016728	2989	ADD	5.34273	2.31305	10.5291	0.00117511	exonic	UTP18	.	synonymous_SNV	UTP18:NM_016001:exon9:c.C1123T:p.L375L	0	11.72
17	72218654	17:72218654:G:A	G	A	0.00016728	2989	ADD	5.34273	2.31305	10.5291	0.00117511	exonic	TTYH2	.	nonsynonymous_SNV	TTYH2:NM_001330453:exon2:c.G97A:p.V33I,TTYH2:NM_032646:exon2:c.G160A:p.V54I	0.0002	12.18
17	18077113	17:18077113:C:G	C	G	0.000167448	2986	ADD	5.34272	2.31304	10.529	0.00117514	exonic	MYO15A	.	nonsynonymous_SNV	MYO15A:NM_016239:exon64:c.C10369G:p.P3457A	6.611e-05	22.5
17	58734145	17:58734145:T:C	T	C	0.000167336	2988	ADD	5.34272	2.31304	10.529	0.00117514	exonic	PPM1D	.	synonymous_SNV	PPM1D:NM_003620:exon5:c.T1203C:p.Y401Y	0	8.371
17	4535281	17:4535281:G:A	G	A	0.000167448	2986	ADD	5.34271	2.31304	10.529	0.00117517	exonic	ALOX15	.	nonsynonymous_SNV	ALOX15:NM_001140:exon13:c.C1712T:p.A571V	0.0001	7.185
17	38186089	17:38186089:G:A	G	A	0.000167392	2987	ADD	5.34265	2.31301	10.5288	0.0011753	exonic	MED24	.	nonsynonymous_SNV	MED24:NM_001079518:exon12:c.C1139T:p.P380L,MED24:NM_001267797:exon12:c.C1139T:p.P380L,MED24:NM_014815:exon13:c.C1178T:p.P393L,MED24:NM_001330211:exon14:c.C1235T:p.P412L	2.686e-05	23
12	123481388	12:123481388:G:A	G	A	0.00016728	2989	ADD	5.33876	2.31116	10.5253	0.0011775	exonic	PITPNM2	.	synonymous_SNV	PITPNM2:NM_001300801:exon11:c.C1542T:p.L514L,PITPNM2:NM_020845:exon11:c.C1542T:p.L514L	0	10.53
12	132528232	12:132528232:T:C	T	C	0.00016728	2989	ADD	5.33876	2.31116	10.5253	0.0011775	exonic	EP400	.	nonsynonymous_SNV	EP400:NM_015409:exon34:c.T6409C:p.F2137L	6.659e-05	22
12	94975869	12:94975869:C:T	C	T	0.000167336	2988	ADD	5.33875	2.31115	10.5253	0.00117752	exonic	TMCC3	.	nonsynonymous_SNV	TMCC3:NM_001301036:exon2:c.G431A:p.R144Q,TMCC3:NM_020698:exon2:c.G524A:p.R175Q	0.0002	24.2
12	53166032	12:53166032:T:C	T	C	0.000167504	2985	ADD	5.33872	2.31113	10.5252	0.00117761	exonic	KRT76	.	nonsynonymous_SNV	KRT76:NM_015848:exon5:c.A983G:p.Q328R	0.0012	25.5
14	36147197	14:36147197:T:C	T	C	0.000335008	2985	ADD	4.93955	1.44123	10.5212	0.00118016	exonic	RALGAPA1	.	nonsynonymous_SNV	RALGAPA1:NM_001330075:exon21:c.A4442G:p.E1481G,RALGAPA1:NM_001346243:exon21:c.A3065G:p.E1022G,RALGAPA1:NM_001346246:exon21:c.A3065G:p.E1022G,RALGAPA1:NM_001346248:exon21:c.A4442G:p.E1481G,RALGAPA1:NM_014990:exon21:c.A3065G:p.E1022G,RALGAPA1:NM_194301:exon21:c.A3065G:p.E1022G,RALGAPA1:NM_001283043:exon22:c.A3104G:p.E1035G,RALGAPA1:NM_001283044:exon22:c.A3206G:p.E1069G,RALGAPA1:NM_001346245:exon22:…	0.0481	24.7
8	23004486	8:23004486:G:A	G	A	0.00167336	2988	ADD	3.37314	0.852153	10.5205	0.00118062	exonic	TNFRSF10D	.	nonsynonymous_SNV	TNFRSF10D:NM_003840:exon4:c.C470T:p.T157M	0.0024	11.92
18	6999565	18:6999565:G:A	G	A	0.000167392	2987	ADD	5.33758	2.31144	10.5203	0.00118073	exonic	LAMA1	.	synonymous_SNV	LAMA1:NM_005559:exon32:c.C4542T:p.H1514H	0.0001	0.143
13	33703821	13:33703821:G:A	G	A	0.00016728	2989	ADD	5.34427	2.3175	10.5194	0.00118127	exonic	STARD13	.	synonymous_SNV	STARD13:NM_001243466:exon5:c.C969T:p.G323G,STARD13:NM_001243474:exon5:c.C639T:p.G213G,STARD13:NM_052851:exon5:c.C639T:p.G213G,STARD13:NM_178006:exon5:c.C993T:p.G331G,STARD13:NM_178007:exon5:c.C969T:p.G323G,STARD13:NM_001243476:exon9:c.C888T:p.G296G	0.0006	0.812
13	29287583	13:29287583:G:A	G	A	0.000167392	2987	ADD	5.34424	2.31748	10.5193	0.00118133	exonic	SLC46A3	.	synonymous_SNV	SLC46A3:NM_001135919:exon3:c.C294T:p.Y98Y,SLC46A3:NM_001347960:exon3:c.C294T:p.Y98Y,SLC46A3:NM_181785:exon3:c.C294T:p.Y98Y	0.0001	0.008
12	77419723	12:77419723:G:A	G	A	0.000174581	2864	ADD	5.33667	2.30994	10.5167	0.00118301	exonic	E2F7	.	nonsynonymous_SNV	E2F7:NM_203394:exon12:c.C2180T:p.T727I	0.0002	4.321
1	46662456	1:46662456:C:T	C	T	0.0018407	2988	ADD	2.51805	0.728722	10.5122	0.00118588	exonic	POMGNT1	.	nonsynonymous_SNV	POMGNT1:NM_001290129:exon3:c.G235A:p.V79I,POMGNT1:NM_001243766:exon4:c.G301A:p.V101I,POMGNT1:NM_017739:exon4:c.G301A:p.V101I	0.0461	19.05
18	908343	18:908343:C:T	C	T	0.000168919	2960	ADD	5.33385	2.31108	10.5081	0.0011885	exonic	ADCYAP1	.	nonsynonymous_SNV	ADCYAP1:NM_001117:exon3:c.C320T:p.S107L,ADCYAP1:NM_001099733:exon4:c.C320T:p.S107L	0.0001	24.8
16	68155940	16:68155940:C:T	C	T	0.000335345	2982	ADD	5.44382	1.69315	10.5072	0.0011891	exonic	NFATC3	.	nonsynonymous_SNV	NFATC3:NM_004555:exon2:c.C154T:p.P52S,NFATC3:NM_173163:exon2:c.C154T:p.P52S,NFATC3:NM_173165:exon2:c.C154T:p.P52S	0.001	21.6
23	71521598	X:71521598:G:A	G	A	0.000669344	2988	ADD	2.72641	0.976867	10.5063	0.00118968	exonic	CITED1	.	nonsynonymous_SNV	CITED1:NM_001144886:exon3:c.C557T:p.T186I,CITED1:NM_001144887:exon3:c.C557T:p.T186I,CITED1:NM_004143:exon3:c.C557T:p.T186I,CITED1:NM_001144885:exon4:c.C635T:p.T212I	0.0028	NA
4	187630310	4:187630310:A:G	A	G	0.000334672	2988	ADD	4.94951	1.44793	10.5044	0.00119091	exonic	FAT1	.	synonymous_SNV	FAT1:NM_005245:exon2:c.T672C:p.A224A	0.0001	10.66
12	52284830	12:52284830:C:T	C	T	0.00033557	2980	ADD	4.89632	1.4248	10.5035	0.00119152	exonic	ANKRD33	.	nonsynonymous_SNV	ANKRD33:NM_182608:exon5:c.C1100T:p.P367L,ANKRD33:NM_001304459:exon6:c.C788T:p.P263L	3.25e-05	10.96
13	23911651	13:23911651:T:C	T	C	0.000169205	2955	ADD	5.33071	2.31114	10.4993	0.00119418	exonic	SACS	.	nonsynonymous_SNV	SACS:NM_001278055:exon8:c.A5923G:p.K1975E,SACS:NM_014363:exon10:c.A6364G:p.K2122E	0.0006	25.8
7	100451890	7:100451890:A:G	A	G	0.000334672	2988	ADD	4.98604	1.46583	10.4977	0.0011952	exonic	SLC12A9	.	nonsynonymous_SNV	SLC12A9:NM_001267812:exon2:c.A71G:p.N24S,SLC12A9:NM_001267814:exon2:c.A71G:p.N24S,SLC12A9:NM_001363493:exon2:c.A71G:p.N24S,SLC12A9:NM_020246:exon2:c.A71G:p.N24S	0.0094	0.014
8	61135309	8:61135309:G:A	G	A	0.000167616	2983	ADD	5.329	2.3114	10.4948	0.0011971	exonic	CA8	.	nonsynonymous_SNV	CA8:NM_001321839:exon6:c.C541T:p.R181W,CA8:NM_001321837:exon7:c.C637T:p.R213W,CA8:NM_001321838:exon7:c.C637T:p.R213W,CA8:NM_004056:exon7:c.C637T:p.R213W	6.659e-05	31
8	8748917	8:8748917:C:T	C	T	0.000168805	2962	ADD	5.32858	2.31115	10.493	0.00119826	exonic	MFHAS1	.	nonsynonymous_SNV	MFHAS1:NM_004225:exon1:c.G1652A:p.C551Y	0	27
8	117875466	8:117875466:G:C	G	C	0.000170416	2934	ADD	5.32826	2.31097	10.4917	0.00119911	exonic	RAD21	.	synonymous_SNV	RAD21:NM_006265:exon3:c.C177G:p.L59L	0	10.23
8	67476930	8:67476930:A:T	A	T	0.000171233	2920	ADD	5.32805	2.31084	10.4909	0.00119967	UTR3	MYBL1	NM_001080416:c.*2T>A\x3bNM_001294282:c.*2T>A\x3bNM_001144755:c.*2T>A	.	.	0	12.95
1	880971	1:880971:GTCC:G	GTCC	G	0.00016728	2989	ADD	5.32597	2.31128	10.4869	0.00120221	exonic	NOC2L	.	nonframeshift_deletion	NOC2L:NM_015658:exon17:c.1977_1979del:p.E659del	0.0005	21.2
1	28858749	1:28858749:A:G	A	G	0.00016728	2989	ADD	5.32597	2.31128	10.4869	0.00120221	exonic	RCC1	.	nonsynonymous_SNV	RCC1:NM_001269:exon4:c.A328G:p.M110V,RCC1:NM_001048194:exon5:c.A421G:p.M141V,RCC1:NM_001048195:exon5:c.A379G:p.M127V,RCC1:NM_001048199:exon6:c.A328G:p.M110V	0	17.96
1	109812136	1:109812136:C:T	C	T	0.00016728	2989	ADD	5.32597	2.31128	10.4869	0.00120221	exonic	CELSR2	.	synonymous_SNV	CELSR2:NM_001408:exon21:c.C6903T:p.P2301P	0.0141	2.483
1	114680593	1:114680593:C:G	C	G	0.00016728	2989	ADD	5.32597	2.31128	10.4869	0.00120221	exonic	SYT6	.	nonsynonymous_SNV	SYT6:NM_001253772:exon3:c.G595C:p.E199Q,SYT6:NM_001270805:exon3:c.G340C:p.E114Q,SYT6:NM_001366223:exon3:c.G340C:p.E114Q,SYT6:NM_001366224:exon3:c.G595C:p.E199Q,SYT6:NM_001366225:exon3:c.G595C:p.E199Q,SYT6:NM_001366226:exon3:c.G340C:p.E114Q,SYT6:NM_205848:exon3:c.G340C:p.E114Q	0.0002	23.6
1	152081201	1:152081201:C:T	C	T	0.00016728	2989	ADD	5.32597	2.31128	10.4869	0.00120221	exonic	TCHH	.	nonsynonymous_SNV	TCHH:NM_007113:exon3:c.G4492A:p.E1498K	0.0002	17.6
1	232941067	1:232941067:G:A	G	A	0.00016728	2989	ADD	5.32597	2.31128	10.4869	0.00120221	exonic	MAP10	.	nonsynonymous_SNV	MAP10:NM_019090:exon1:c.G298A:p.A100T	8.954e-06	8.729
1	237711852	1:237711852:G:A	G	A	0.00016728	2989	ADD	5.32597	2.31128	10.4869	0.00120221	exonic	RYR2	.	nonsynonymous_SNV	RYR2:NM_001035:exon26:c.G3028A:p.D1010N	8.955e-06	24.9
1	247615025	1:247615025:A:G	A	G	0.000167336	2988	ADD	5.32597	2.31128	10.4869	0.00120224	exonic	OR2B11	.	nonsynonymous_SNV	OR2B11:NM_001004492:exon1:c.T260C:p.V87A	0.0008	17.98
1	99771828	1:99771828:A:C	A	C	0.000167504	2985	ADD	5.32592	2.31125	10.4867	0.00120235	exonic	PLPPR4	.	synonymous_SNV	PLPPR4:NM_001166252:exon6:c.A1380C:p.G460G,PLPPR4:NM_014839:exon7:c.A1554C:p.G518G	0.001	5.765
1	40705912	1:40705912:A:G	A	G	0.000167616	2983	ADD	5.32589	2.31124	10.4866	0.00120243	exonic	RLF	.	synonymous_SNV	RLF:NM_012421:exon8:c.A5538G:p.L1846L	0.0004	8.078
1	23418281	1:23418281:T:A	T	A	0.000167504	2985	ADD	5.32586	2.31122	10.4865	0.00120251	exonic	LUZP1	.	nonsynonymous_SNV	LUZP1:NM_001142546:exon3:c.A2474T:p.Q825L,LUZP1:NM_033631:exon4:c.A2474T:p.Q825L	0.0004	21.6
4	25366703	4:25366703:C:G	C	G	0.00016728	2989	ADD	5.33316	2.31759	10.4864	0.00120254	exonic	ZCCHC4	.	nonsynonymous_SNV	ZCCHC4:NM_024936:exon12:c.C1321G:p.P441A	7.163e-05	11.39
4	186361698	4:186361698:C:T	C	T	0.000167336	2988	ADD	5.33315	2.31759	10.4864	0.00120254	exonic	C4orf47	.	nonsynonymous_SNV	C4orf47:NM_001346007:exon3:c.C161T:p.A54V,C4orf47:NM_001114357:exon5:c.C539T:p.A180V	0.001	13.41
4	6865719	4:6865719:G:T	G	T	0.000167616	2983	ADD	5.33302	2.31751	10.4859	0.00120293	exonic	KIAA0232	.	nonsynonymous_SNV	KIAA0232:NM_001100590:exon6:c.G3610T:p.V1204L,KIAA0232:NM_014743:exon7:c.G3610T:p.V1204L	0.0001	15.02
4	76891473	4:76891473:T:C	T	C	0.000167785	2980	ADD	5.33299	2.3175	10.4858	0.00120298	exonic	SDAD1	.	nonsynonymous_SNV	SDAD1:NM_001288983:exon9:c.A761G:p.H254R,SDAD1:NM_001288984:exon10:c.A581G:p.H194R,SDAD1:NM_018115:exon10:c.A872G:p.H291R	2.981e-05	25.1
1	109377133	1:109377133:T:C	T	C	0.000168067	2975	ADD	5.32554	2.31103	10.4851	0.0012034	exonic	AKNAD1	.	nonsynonymous_SNV	AKNAD1:NM_152763:exon9:c.A1682G:p.Y561C	0.0001	9.798
9	137707460	9:137707460:A:C	A	C	0.000167336	2988	ADD	5.32762	2.3131	10.4843	0.0012039	exonic	COL5A1	.	synonymous_SNV	COL5A1:NM_000093:exon51:c.A4053C:p.G1351G,COL5A1:NM_001278074:exon51:c.A4053C:p.G1351G	9.025e-06	9.947
9	95027286	9:95027286:A:C	A	C	0.000167392	2987	ADD	5.32761	2.31309	10.4843	0.00120393	exonic	IARS	.	nonsynonymous_SNV	IARS:NM_002161:exon16:c.T1625G:p.F542C,IARS:NM_013417:exon16:c.T1625G:p.F542C	0	28.6
4	144135481	4:144135481:A:G	A	G	0.000169319	2953	ADD	5.33254	2.31723	10.4838	0.00120426	exonic	USP38	.	synonymous_SNV	USP38:NM_001290325:exon9:c.A2352G:p.V784V,USP38:NM_032557:exon9:c.A2352G:p.V784V,USP38:NM_001290326:exon10:c.A987G:p.V329V	0.0009	9.699
9	20988372	9:20988372:T:C	T	C	0.000167448	2986	ADD	5.32744	2.313	10.4836	0.00120437	exonic	FOCAD	.	nonsynonymous_SNV	FOCAD:NM_017794:exon43:c.T4948C:p.Y1650H	6.537e-05	19.94
9	132638516	9:132638516:A:G	A	G	0.000168011	2976	ADD	5.32733	2.31293	10.4831	0.0012047	exonic	USP20	.	nonsynonymous_SNV	USP20:NM_001008563:exon22:c.A2408G:p.K803R,USP20:NM_001110303:exon22:c.A2408G:p.K803R,USP20:NM_006676:exon22:c.A2408G:p.K803R	0.0004	25
14	75485639	14:75485639:G:A	G	A	0.000167336	2988	ADD	5.3251	2.31147	10.4831	0.00120473	exonic	MLH3	.	nonsynonymous_SNV	MLH3:NM_014381:exon11:c.C4063T:p.R1355C,MLH3:NM_001040108:exon12:c.C4135T:p.R1379C	0.0004	25.2
14	105052801	14:105052801:T:G	T	G	0.00016728	2989	ADD	5.3251	2.31147	10.4831	0.00120473	exonic	C14orf180	.	nonsynonymous_SNV	C14orf180:NM_001008404:exon2:c.T34G:p.S12A,C14orf180:NM_001286399:exon2:c.T34G:p.S12A,C14orf180:NM_001286400:exon2:c.T34G:p.S12A	8.741e-05	9.134
14	20841284	14:20841284:A:T	A	T	0.000167504	2985	ADD	5.32506	2.31145	10.4829	0.00120481	exonic	TEP1	.	nonsynonymous_SNV	TEP1:NM_001319035:exon46:c.T6513A:p.S2171R,TEP1:NM_007110:exon48:c.T6837A:p.S2279R	2.699e-05	18.13
14	20841285	14:20841285:C:A	C	A	0.000167504	2985	ADD	5.32506	2.31145	10.4829	0.00120481	exonic	TEP1	.	nonsynonymous_SNV	TEP1:NM_001319035:exon46:c.G6512T:p.S2171I,TEP1:NM_007110:exon48:c.G6836T:p.S2279I	2.7e-05	19.07
14	51233105	14:51233105:G:C	G	C	0.000167504	2985	ADD	5.32504	2.31144	10.4828	0.0012049	exonic	NIN	.	nonsynonymous_SNV	NIN:NM_016350:exon14:c.C1555G:p.L519V,NIN:NM_020921:exon14:c.C1555G:p.L519V,NIN:NM_182944:exon14:c.C1555G:p.L519V,NIN:NM_182946:exon14:c.C1555G:p.L519V	1.79e-05	24.9
21	45389086	21:45389086:C:T	C	T	0.00016728	2989	ADD	5.32466	2.3115	10.4822	0.00120534	exonic	AGPAT3	.	nonsynonymous_SNV	AGPAT3:NM_001037553:exon4:c.C436T:p.R146W,AGPAT3:NM_001369878:exon4:c.C436T:p.R146W,AGPAT3:NM_001369880:exon4:c.C436T:p.R146W,AGPAT3:NM_001369881:exon5:c.C250T:p.R84W,AGPAT3:NM_020132:exon5:c.C436T:p.R146W	0	24.1
21	45675981	21:45675981:C:A	C	A	0.00016728	2989	ADD	5.32466	2.3115	10.4822	0.00120534	exonic	DNMT3L	.	synonymous_SNV	DNMT3L:NM_013369:exon7:c.G573T:p.R191R,DNMT3L:NM_175867:exon7:c.G573T:p.R191R	0.0066	0.089
3	157178026	3:157178026:G:T	G	T	0.0016728	2989	ADD	3.20022	0.76851	10.4779	0.00120809	exonic	VEPH1	.	nonsynonymous_SNV	VEPH1:NM_001167917:exon3:c.C473A:p.T158N,VEPH1:NM_001167911:exon4:c.C473A:p.T158N,VEPH1:NM_001167912:exon4:c.C473A:p.T158N,VEPH1:NM_001167916:exon4:c.C473A:p.T158N,VEPH1:NM_024621:exon4:c.C473A:p.T158N,VEPH1:NM_001167915:exon5:c.C473A:p.T158N	0.0012	16.77
16	1869944	16:1869944:C:T	C	T	0.000502344	2986	ADD	4.64303	1.39182	10.4759	0.00120946	exonic	HAGH	.	nonsynonymous_SNV	HAGH:NM_001286249:exon4:c.G386A:p.R129H,HAGH:NM_001363912:exon4:c.G386A:p.R129H,HAGH:NM_005326:exon4:c.G386A:p.R129H,HAGH:NM_001040427:exon5:c.G242A:p.R81H,HAGH:NM_001363914:exon5:c.G242A:p.R81H	0.0002	25.3
2	33809926	2:33809926:C:G	C	G	0.000167336	2988	ADD	5.32352	2.31278	10.4733	0.00121113	exonic	FAM98A	.	nonsynonymous_SNV	FAM98A:NM_001304538:exon7:c.G889C:p.G297R,FAM98A:NM_015475:exon8:c.G1474C:p.G492R	8.952e-06	29.4
2	105984122	2:105984122:T:C	T	C	0.000167392	2987	ADD	5.32351	2.31277	10.4732	0.00121116	exonic	FHL2	.	nonsynonymous_SNV	FHL2:NM_001318897:exon3:c.A64G:p.I22V,FHL2:NM_001318894:exon4:c.A406G:p.I136V,FHL2:NM_001318896:exon4:c.A406G:p.I136V,FHL2:NM_001318898:exon4:c.A64G:p.I22V,FHL2:NM_001450:exon4:c.A406G:p.I136V,FHL2:NM_201557:exon4:c.A406G:p.I136V,FHL2:NM_001039492:exon5:c.A406G:p.I136V,FHL2:NM_001318895:exon5:c.A406G:p.I136V,FHL2:NM_001318899:exon6:c.A82G:p.I28V,FHL2:NM_201555:exon6:c.A406G:p.I136V	0	22.8
2	119729104	2:119729104:G:A	G	A	0.000167504	2985	ADD	5.32349	2.31276	10.4731	0.00121121	exonic	MARCO	.	nonsynonymous_SNV	MARCO:NM_006770:exon4:c.G454A:p.A152T	0.0002	0.009
2	179594510	2:179594510:A:G	A	G	0.000167504	2985	ADD	5.32349	2.31276	10.4731	0.00121124	exonic	TTN	.	nonsynonymous_SNV	TTN:NM_133378:exon60:c.T14738C:p.I4913T,TTN:NM_001256850:exon61:c.T17519C:p.I5840T,TTN:NM_001267550:exon63:c.T18470C:p.I6157T	0.0003	13.31
2	203162217	2:203162217:G:A	G	A	0.000167616	2983	ADD	5.32344	2.31273	10.4729	0.00121138	exonic	NOP58	.	nonsynonymous_SNV	NOP58:NM_015934:exon11:c.G1187A:p.R396K	6.663e-05	23.9
2	131796443	2:131796443:T:C	T	C	0.000167673	2982	ADD	5.32343	2.31272	10.4729	0.00121141	exonic	ARHGEF4	.	synonymous_SNV	ARHGEF4:NM_001367493:exon6:c.T4143C:p.S1381S,ARHGEF4:NM_015320:exon7:c.T585C:p.S195S	6.672e-05	11.24
2	241710495	2:241710495:G:A	G	A	0.000167504	2985	ADD	5.32338	2.31269	10.4726	0.00121155	exonic	KIF1A	.	nonsynonymous_SNV	KIF1A:NM_004321:exon14:c.C1207T:p.P403S,KIF1A:NM_001244008:exon15:c.C1234T:p.P412S,KIF1A:NM_001320705:exon15:c.C1234T:p.P412S,KIF1A:NM_001330289:exon15:c.C1234T:p.P412S,KIF1A:NM_001330290:exon15:c.C1309T:p.P437S	8.965e-06	22.1
2	228846548	2:228846548:C:T	C	T	0.000167616	2983	ADD	5.32335	2.31267	10.4725	0.00121163	exonic	SPHKAP	.	nonsynonymous_SNV	SPHKAP:NM_030623:exon11:c.G4901A:p.R1634Q,SPHKAP:NM_001142644:exon12:c.G4988A:p.R1663Q	0.0003	11.15
2	238277502	2:238277502:C:T	C	T	0.000167616	2983	ADD	5.32333	2.31267	10.4725	0.00121169	exonic	COL6A3	.	nonsynonymous_SNV	COL6A3:NM_057166:exon7:c.G2783A:p.R928H,COL6A3:NM_057167:exon9:c.G3986A:p.R1329H,COL6A3:NM_004369:exon10:c.G4604A:p.R1535H	0.0012	29.3
2	219296873	2:219296873:C:T	C	T	0.000167673	2982	ADD	5.32326	2.31262	10.4722	0.00121188	exonic	VIL1	.	synonymous_SNV	VIL1:NM_007127:exon12:c.C1308T:p.G436G	0.0002	8.759
21	35890426	21:35890426:T:C	T	C	0.00016728	2989	ADD	5.3274	2.31674	10.4713	0.00121244	exonic	RCAN1	.	nonsynonymous_SNV	RCAN1:NM_001285389:exon4:c.A472G:p.I158V,RCAN1:NM_001285391:exon4:c.A790G:p.I264V,RCAN1:NM_001285392:exon4:c.A310G:p.I104V,RCAN1:NM_001285393:exon4:c.A310G:p.I104V,RCAN1:NM_004414:exon4:c.A715G:p.I239V,RCAN1:NM_203417:exon4:c.A310G:p.I104V,RCAN1:NM_203418:exon4:c.A550G:p.I184V	0	20.2
21	15873054	21:15873054:T:C	T	C	0.000167448	2986	ADD	5.32735	2.31671	10.471	0.00121261	exonic	SAMSN1	.	synonymous_SNV	SAMSN1:NM_022136:exon6:c.A564G:p.K188K,SAMSN1:NM_001256370:exon7:c.A768G:p.K256K,SAMSN1:NM_001286523:exon7:c.A357G:p.K119K	0	16.36
6	143094688	6:143094688:A:C	A	C	0.000167336	2988	ADD	5.3184	2.31151	10.4637	0.00121745	exonic	HIVEP2	.	synonymous_SNV	HIVEP2:NM_006734:exon5:c.T1188G:p.T396T	0.0002	10.52
6	170626659	6:170626659:G:C	G	C	0.00016728	2989	ADD	5.3184	2.31152	10.4637	0.00121745	exonic	FAM120B	.	nonsynonymous_SNV	FAM120B:NM_001286379:exon2:c.G217C:p.G73R,FAM120B:NM_001286380:exon2:c.G250C:p.G84R,FAM120B:NM_032448:exon2:c.G181C:p.G61R	0	28.9
6	47682373	6:47682373:C:T	C	T	0.000167504	2985	ADD	5.31837	2.31149	10.4635	0.00121756	exonic	ADGRF4	.	synonymous_SNV	ADGRF4:NM_001347855:exon6:c.C1392T:p.N464N,ADGRF4:NM_153838:exon6:c.C1392T:p.N464N	1.8e-05	0.111
6	7249048	6:7249048:G:A	G	A	0.000167785	2980	ADD	5.31827	2.31144	10.4631	0.00121781	exonic	RREB1	.	synonymous_SNV	RREB1:NM_001003698:exon12:c.G4911A:p.T1637T,RREB1:NM_001003700:exon12:c.G4278A:p.T1426T,RREB1:NM_001168344:exon12:c.G4911A:p.T1637T,RREB1:NM_001003699:exon13:c.G5076A:p.T1692T	7.258e-05	0.011
6	51586790	6:51586790:T:C	T	C	0.000167954	2977	ADD	5.31822	2.31141	10.4629	0.00121792	exonic	PKHD1	.	synonymous_SNV	PKHD1:NM_170724:exon61:c.A10185G:p.S3395S	0	6.922
6	116381427	6:116381427:G:A	G	A	0.000168124	2974	ADD	5.31822	2.31141	10.4629	0.00121792	exonic	FRK	.	synonymous_SNV	FRK:NM_002031:exon1:c.C48T:p.L16L	0	7.407
15	89386664	15:89386664:G:A	G	A	0.000335233	2983	ADD	4.8852	1.42618	10.4617	0.00121874	exonic	ACAN	.	nonsynonymous_SNV	ACAN:NM_001135:exon6:c.G836A:p.R279Q,ACAN:NM_001369268:exon6:c.G836A:p.R279Q,ACAN:NM_013227:exon6:c.G836A:p.R279Q	0.0004	26.8
23	53263739	X:53263739:G:A	G	A	0.000334672	2988	ADD	2.66244	1.15891	10.461	0.00121919	exonic	IQSEC2	.	nonsynonymous_SNV	IQSEC2:NM_001111125:exon15:c.C4129T:p.H1377Y	0	NA
23	115304473	X:115304473:A:G	A	G	0.000334672	2988	ADD	2.66244	1.15891	10.461	0.00121919	exonic	AGTR2	.	nonsynonymous_SNV	AGTR2:NM_000686:exon3:c.A940G:p.N314D	0	NA
23	48762041	X:48762041:G:A	G	A	0.00033557	2980	ADD	2.66236	1.15886	10.4603	0.00121966	exonic	SLC35A2	.	nonsynonymous_SNV	SLC35A2:NM_001282649:exon3:c.C962T:p.T321M,SLC35A2:NM_001042498:exon4:c.C1145T:p.T382M,SLC35A2:NM_001282650:exon4:c.C1184T:p.T395M,SLC35A2:NM_005660:exon4:c.C1145T:p.T382M,SLC35A2:NM_001282651:exon5:c.C1229T:p.T410M	0.002	NA
23	150912336	X:150912336:T:C	T	C	0.000335683	2979	ADD	2.66236	1.15886	10.4603	0.00121969	exonic	CNGA2	.	nonsynonymous_SNV	CNGA2:NM_005140:exon7:c.T1361C:p.I454T	0.0002	NA
21	34022646	21:34022646:C:T	C	T	0.00016756	2984	ADD	5.31946	2.31316	10.4599	0.00121992	exonic	SYNJ1	.	nonsynonymous_SNV	SYNJ1:NM_001160306:exon22:c.G2870A:p.R957Q,SYNJ1:NM_001160302:exon23:c.G2885A:p.R962Q,SYNJ1:NM_003895:exon23:c.G3002A:p.R1001Q,SYNJ1:NM_203446:exon23:c.G3002A:p.R1001Q	0.0002	29.7
10	65379479	10:65379479:A:G	A	G	0.000335008	2985	ADD	4.87366	1.42163	10.4577	0.00122141	exonic	REEP3	.	synonymous_SNV	REEP3:NM_001001330:exon7:c.A630G:p.S210S	9.388e-05	11.48
12	13243741	12:13243741:C:T	C	T	0.00016728	2989	ADD	5.31854	2.31593	10.4497	0.00122668	exonic	GSG1	.	synonymous_SNV	GSG1:NM_001080554:exon2:c.G60A:p.S20S,GSG1:NM_001080555:exon2:c.G60A:p.S20S,GSG1:NM_001206842:exon2:c.G60A:p.S20S,GSG1:NM_001206843:exon2:c.G21A:p.S7S,GSG1:NM_001206845:exon2:c.G21A:p.S7S,GSG1:NM_001367358:exon2:c.G60A:p.S20S,GSG1:NM_001367359:exon2:c.G60A:p.S20S,GSG1:NM_001367360:exon2:c.G60A:p.S20S,GSG1:NM_001367361:exon2:c.G60A:p.S20S,GSG1:NM_001367362:exon2:c.G60A:p.S20S,GSG1:NM_001367363:exo…	0.0001	8.73
12	88482985	12:88482985:T:C	T	C	0.00016728	2989	ADD	5.31854	2.31593	10.4497	0.00122668	exonic	CEP290	.	nonsynonymous_SNV	CEP290:NM_025114:exon31:c.A3853G:p.K1285E	9.014e-06	26.2
12	122675952	12:122675952:T:C	T	C	0.00016728	2989	ADD	5.31854	2.31593	10.4497	0.00122668	exonic	LRRC43	.	synonymous_SNV	LRRC43:NM_001098519:exon6:c.T927C:p.F309F,LRRC43:NM_152759:exon6:c.T372C:p.F124F	6.292e-05	4.268
12	133240973	12:133240973:C:G	C	G	0.000167336	2988	ADD	5.31852	2.31592	10.4496	0.00122676	exonic	POLE	.	nonsynonymous_SNV	POLE:NM_006231:exon22:c.G2544C:p.E848D	0	24.2
7	31815285	7:31815285:C:G	C	G	0.0050184	2989	ADD	2.49596	0.598497	10.4483	0.00122761	exonic	PDE1C	.	synonymous_SNV	PDE1C:NM_001191057:exon17:c.G1953C:p.T651T,PDE1C:NM_001191058:exon18:c.G2133C:p.T711T,PDE1C:NM_001191059:exon18:c.G1953C:p.T651T,PDE1C:NM_001322055:exon18:c.G1953C:p.T651T	0.0148	0.653
12	133158791	12:133158791:C:G	C	G	0.00017001	2941	ADD	5.31772	2.31545	10.4464	0.00122888	exonic	FBRSL1	.	nonsynonymous_SNV	FBRSL1:NM_001142641:exon16:c.C2269G:p.R757G,FBRSL1:NM_001367871:exon18:c.C2140G:p.R714G	0.0004	25.3
15	80855554	15:80855554:C:T	C	T	0.00033456	2989	ADD	5.01235	1.48592	10.4463	0.00122897	exonic	ARNT2	.	synonymous_SNV	ARNT2:NM_014862:exon12:c.C1290T:p.Y430Y	0.0004	9.638
10	49997974	10:49997974:C:T	C	T	0.000334896	2986	ADD	4.86986	1.42172	10.4457	0.00122936	exonic	WDFY4	.	nonsynonymous_SNV	WDFY4:NM_001370153:exon22:c.C4010T:p.A1337V,WDFY4:NM_020945:exon22:c.C4010T:p.A1337V	0.0003	26.8
2	48808774	2:48808774:G:C	G	C	0.000335458	2981	ADD	5.05361	1.50608	10.4349	0.00123657	exonic	STON1\x3bSTON1-GTF2A1L	.	nonsynonymous_SNV	STON1-GTF2A1L:NM_001198594:exon1:c.G1002C:p.K334N,STON1-GTF2A1L:NM_001198593:exon2:c.G1002C:p.K334N,STON1:NM_006873:exon2:c.G1002C:p.K334N,STON1-GTF2A1L:NM_172311:exon2:c.G1002C:p.K334N,STON1:NM_001198595:exon3:c.G1002C:p.K334N	0.001	23.6
22	32838673	22:32838673:G:A	G	A	0.00016728	2989	ADD	5.31531	2.31773	10.4335	0.00123749	exonic	BPIFC	.	nonsynonymous_SNV	BPIFC:NM_174932:exon6:c.C640T:p.L214F	0.0007	23.1
22	26168441	22:26168441:C:G	C	G	0.000167336	2988	ADD	5.31529	2.31772	10.4334	0.00123754	exonic	MYO18B	.	synonymous_SNV	MYO18B:NM_001318245:exon7:c.C1833G:p.L611L,MYO18B:NM_032608:exon7:c.C1833G:p.L611L	0.0002	2.579
22	24159093	22:24159093:G:A	G	A	0.000167448	2986	ADD	5.31525	2.31769	10.4333	0.00123766	exonic	SMARCB1	.	synonymous_SNV	SMARCB1:NM_001007468:exon6:c.G738A:p.E246E,SMARCB1:NM_001317946:exon6:c.G792A:p.E264E,SMARCB1:NM_001362877:exon6:c.G819A:p.E273E,SMARCB1:NM_003073:exon6:c.G765A:p.E255E	0	10.68
23	135453647	X:135453647:C:T	C	T	0.00016818	2973	ADD	5.30715	2.31467	10.4261	0.00124248	exonic	ADGRG4	.	synonymous_SNV	ADGRG4:NM_153834:exon14:c.C7557T:p.N2519N	0.0002	NA
8	1806177	8:1806177:A:G	A	G	0.000167336	2988	ADD	5.31279	2.31777	10.4259	0.0012426	exonic	ARHGEF10	.	nonsynonymous_SNV	ARHGEF10:NM_001308152:exon3:c.A89G:p.Q30R,ARHGEF10:NM_014629:exon3:c.A89G:p.Q30R,ARHGEF10:NM_001308153:exon4:c.A161G:p.Q54R	0	11.27
8	27931905	8:27931905:A:G	A	G	0.000167336	2988	ADD	5.31278	2.31776	10.4259	0.00124262	exonic	NUGGC	.	nonsynonymous_SNV	NUGGC:NM_001010906:exon2:c.T23C:p.F8S	6.664e-05	14.84
8	23160900	8:23160900:T:C	T	C	0.000167392	2987	ADD	5.31275	2.31774	10.4258	0.00124271	exonic	LOXL2	.	nonsynonymous_SNV	LOXL2:NM_002318:exon11:c.A1891G:p.S631G	1.792e-05	28.5
8	140898187	8:140898187:C:T	C	T	0.000167392	2987	ADD	5.3127	2.31771	10.4255	0.00124285	exonic	TRAPPC9	.	synonymous_SNV	TRAPPC9:NM_001321646:exon20:c.G2964A:p.A988A,TRAPPC9:NM_001160372:exon21:c.G2991A:p.A997A,TRAPPC9:NM_031466:exon21:c.G3285A:p.A1095A	0.0011	5.627
1	171178002	1:171178002:G:C	G	C	0.000503694	2978	ADD	3.82706	1.28727	10.4233	0.00124437	exonic	FMO2	.	unknown	UNKNOWN	0.0232	21
23	100515548	X:100515548:C:T	C	T	0.000167336	2988	ADD	5.3047	2.31325	10.4164	0.00124902	exonic	DRP2	.	nonsynonymous_SNV	DRP2:NM_001171184:exon22:c.C2578T:p.R860C,DRP2:NM_001939:exon24:c.C2812T:p.R938C	0.0002	NA
23	117577542	X:117577542:G:A	G	A	0.000167336	2988	ADD	5.3047	2.31325	10.4164	0.00124902	exonic	WDR44	.	nonsynonymous_SNV	WDR44:NM_001184966:exon16:c.G2137A:p.V713I,WDR44:NM_019045:exon18:c.G2404A:p.V802I	7.862e-05	NA
23	19024181	X:19024181:T:C	T	C	0.000167504	2985	ADD	5.30466	2.31323	10.4162	0.00124914	exonic	ADGRG2	.	nonsynonymous_SNV	ADGRG2:NM_001184835:exon19:c.A1664G:p.D555G,ADGRG2:NM_001079860:exon20:c.A1712G:p.D571G,ADGRG2:NM_001184836:exon20:c.A1706G:p.D569G,ADGRG2:NM_001184837:exon20:c.A1688G:p.D563G,ADGRG2:NM_001079859:exon21:c.A1736G:p.D579G,ADGRG2:NM_001184833:exon21:c.A1730G:p.D577G,ADGRG2:NM_001079858:exon22:c.A1778G:p.D593G,ADGRG2:NM_001184834:exon22:c.A1778G:p.D593G,ADGRG2:NM_005756:exon22:c.A1769G:p.D590G	0.0003	NA
23	153581014	X:153581014:C:T	C	T	0.000167336	2988	ADD	5.30464	2.31322	10.4161	0.00124919	exonic	FLNA	.	nonsynonymous_SNV	FLNA:NM_001456:exon39:c.G6385A:p.E2129K,FLNA:NM_001110556:exon40:c.G6409A:p.E2137K	8.219e-05	NA
9	125582878	9:125582878:T:G	T	G	0.000335121	2984	ADD	4.85369	1.41936	10.4156	0.00124954	exonic	PDCL	.	nonsynonymous_SNV	PDCL:NM_005388:exon4:c.A392C:p.Q131P	6.539e-05	19.79
23	53250024	X:53250024:T:C	T	C	0.000168011	2976	ADD	5.30451	2.31314	10.4156	0.00124957	exonic	KDM5C	.	synonymous_SNV	KDM5C:NM_001282622:exon2:c.A225G:p.L75L,KDM5C:NM_001353978:exon2:c.A225G:p.L75L,KDM5C:NM_001353979:exon2:c.A225G:p.L75L,KDM5C:NM_001353981:exon2:c.A225G:p.L75L,KDM5C:NM_001353982:exon2:c.A225G:p.L75L,KDM5C:NM_001353984:exon2:c.A225G:p.L75L,KDM5C:NM_004187:exon2:c.A225G:p.L75L	1.263e-05	NA
19	15166249	19:15166249:G:A	G	A	0.00117174	2987	ADD	3.3734	0.881889	10.4115	0.00125233	exonic	CASP14	.	nonsynonymous_SNV	CASP14:NM_012114:exon6:c.G529A:p.A177T	0.0033	13.75
16	4242191	16:4242191:C:T	C	T	0.000167336	2988	ADD	5.30676	2.31693	10.41	0.00125337	exonic	SRL	.	nonsynonymous_SNV	SRL:NM_001098814:exon6:c.G1385A:p.C462Y,SRL:NM_001323667:exon7:c.G1259A:p.C420Y,SRL:NM_001323668:exon7:c.G1259A:p.C420Y	5.056e-05	28.4
16	30133299	16:30133299:G:A	G	A	0.000167336	2988	ADD	5.30676	2.31693	10.41	0.00125337	exonic	MAPK3	.	nonsynonymous_SNV	MAPK3:NM_001040056:exon2:c.C199T:p.R67C,MAPK3:NM_001109891:exon2:c.C199T:p.R67C,MAPK3:NM_002746:exon2:c.C199T:p.R67C	5.798e-05	29.9
16	30744758	16:30744758:T:A	T	A	0.000167448	2986	ADD	5.30674	2.31692	10.4099	0.00125346	exonic	SRCAP	.	synonymous_SNV	SRCAP:NM_006662:exon28:c.T6285A:p.V2095V	8.965e-06	11.25
16	89350090	16:89350090:C:T	C	T	0.000168294	2971	ADD	5.30634	2.31668	10.4082	0.00125453	exonic	ANKRD11	.	nonsynonymous_SNV	ANKRD11:NM_001256183:exon9:c.G2860A:p.A954T,ANKRD11:NM_013275:exon9:c.G2860A:p.A954T,ANKRD11:NM_001256182:exon10:c.G2860A:p.A954T	3.587e-05	0.032
23	118377149	X:118377149:G:C	G	C	0.000671141	2980	ADD	2.81574	0.857244	10.408	0.0012547	exonic	PGRMC1	.	nonsynonymous_SNV	PGRMC1:NM_001282621:exon2:c.G364C:p.G122R,PGRMC1:NM_006667:exon3:c.G520C:p.G174R	0.0034	NA
16	28909594	16:28909594:G:A	G	A	0.000167336	2988	ADD	5.29906	2.31158	10.4065	0.00125571	exonic	ATP2A1	.	nonsynonymous_SNV	ATP2A1:NM_001286075:exon12:c.G1211A:p.R404Q,ATP2A1:NM_004320:exon14:c.G1586A:p.R529Q,ATP2A1:NM_173201:exon14:c.G1586A:p.R529Q	0.0004	25.1
16	75662475	16:75662475:T:G	T	G	0.000167448	2986	ADD	5.29904	2.31157	10.4065	0.00125574	exonic	KARS	.	nonsynonymous_SNV	KARS:NM_005548:exon13:c.A1687C:p.N563H,KARS:NM_001130089:exon14:c.A1771C:p.N591H	0.0002	26.9
16	85010745	16:85010745:C:T	C	T	0.000167448	2986	ADD	5.29904	2.31157	10.4065	0.00125574	exonic	ZDHHC7	.	nonsynonymous_SNV	ZDHHC7:NM_017740:exon7:c.G706A:p.V236I,ZDHHC7:NM_001145548:exon8:c.G817A:p.V273I	2.685e-05	22.7
16	85688040	16:85688040:C:T	C	T	0.000167448	2986	ADD	5.29904	2.31157	10.4065	0.00125574	exonic	GSE1	.	nonsynonymous_SNV	GSE1:NM_001134473:exon3:c.C271T:p.R91C,GSE1:NM_001278184:exon3:c.C364T:p.R122C,GSE1:NM_014615:exon4:c.C583T:p.R195C	2.141e-05	29
16	30747581	16:30747581:C:G	C	G	0.000167504	2985	ADD	5.29902	2.31155	10.4064	0.00125583	exonic	SRCAP	.	nonsynonymous_SNV	SRCAP:NM_006662:exon32:c.C6790G:p.Q2264E	0	24.2
8	41550371	8:41550371:C:T	C	T	0.000167336	2988	ADD	5.30437	2.3169	10.4029	0.00125817	exonic	ANK1	.	nonsynonymous_SNV	ANK1:NM_000037:exon31:c.G3653A:p.R1218Q,ANK1:NM_020475:exon31:c.G3653A:p.R1218Q,ANK1:NM_020476:exon31:c.G3653A:p.R1218Q,ANK1:NM_020477:exon31:c.G3653A:p.R1218Q,ANK1:NM_001142446:exon32:c.G3776A:p.R1259Q	0.0003	22.8
8	133144460	8:133144460:G:A	G	A	0.000167336	2988	ADD	5.30434	2.31689	10.4028	0.00125823	exonic	KCNQ3	.	synonymous_SNV	KCNQ3:NM_001204824:exon14:c.C1491T:p.S497S,KCNQ3:NM_004519:exon14:c.C1851T:p.S617S	0	11.81
8	12878557	8:12878557:A:G	A	G	0.00016756	2984	ADD	5.30427	2.31685	10.4025	0.00125843	exonic	TRMT9B	.	synonymous_SNV	TRMT9B:NM_020844:exon5:c.A369G:p.A123A	0.0002	10.47
8	13948054	8:13948054:T:C	T	C	0.000167898	2978	ADD	5.30413	2.31676	10.402	0.00125881	exonic	SGCZ	.	synonymous_SNV	SGCZ:NM_001322879:exon7:c.A735G:p.T245T,SGCZ:NM_001322880:exon7:c.A714G:p.T238T,SGCZ:NM_001322881:exon7:c.A492G:p.T164T,SGCZ:NM_139167:exon8:c.A837G:p.T279T	0	8.46
8	39537617	8:39537617:G:A	G	A	0.000168634	2965	ADD	5.30394	2.31665	10.4011	0.00125936	exonic	ADAM18	.	nonsynonymous_SNV	ADAM18:NM_001320313:exon15:c.G1621A:p.A541T,ADAM18:NM_014237:exon16:c.G1693A:p.A565T	0.0021	0.111
17	34072228	17:34072228:C:T	C	T	0.000334784	2987	ADD	4.97365	1.47472	10.4003	0.00125994	exonic	GAS2L2	.	nonsynonymous_SNV	GAS2L2:NM_139285:exon6:c.G2288A:p.R763Q	0.0049	24.1
11	62598671	11:62598671:A:G	A	G	0.00385002	2987	ADD	2.25824	0.593825	10.3996	0.00126043	exonic	STX5	.	synonymous_SNV	STX5:NM_001244666:exon2:c.T45C:p.G15G,STX5:NM_003164:exon2:c.T45C:p.G15G	0.0061	13.62
8	10466860	8:10466860:G:A	G	A	0.000169895	2943	ADD	5.30341	2.31634	10.399	0.00126087	exonic	RP1L1	.	nonsynonymous_SNV	RP1L1:NM_178857:exon4:c.C4748T:p.A1583V	0.0002	9.187
6	76369044	6:76369044:A:G	A	G	0.00251256	2985	ADD	2.62276	0.676416	10.3988	0.00126096	exonic	SENP6	.	nonsynonymous_SNV	SENP6:NM_001100409:exon7:c.A596G:p.Q199R,SENP6:NM_001304792:exon7:c.A596G:p.Q199R,SENP6:NM_015571:exon8:c.A617G:p.Q206R	0.0036	18.33
16	50745114	16:50745114:C:T	C	T	0.00151057	2979	ADD	3.27205	0.825703	10.3929	0.00126503	exonic	NOD2	.	nonsynonymous_SNV	NOD2:NM_001293557:exon3:c.C1211T:p.S404L,NOD2:NM_001370466:exon4:c.C1211T:p.S404L,NOD2:NM_022162:exon4:c.C1292T:p.S431L	0.0017	17.22
17	59821793	17:59821793:CTT:C	CTT	C	0.00016728	2989	ADD	5.29831	2.31568	10.3929	0.00126503	exonic	BRIP1	.	frameshift_deletion	BRIP1:NM_032043:exon15:c.2255_2256del:p.K752Rfs*12	1.793e-05	33
17	62492845	17:62492845:C:G	C	G	0.00016728	2989	ADD	5.29831	2.31568	10.3929	0.00126503	exonic	POLG2	.	nonsynonymous_SNV	POLG2:NM_007215:exon1:c.G242C:p.G81A	0	23.3
17	62504731	17:62504731:A:G	A	G	0.00016728	2989	ADD	5.29831	2.31568	10.3929	0.00126503	exonic	CEP95	.	nonsynonymous_SNV	CEP95:NM_138363:exon2:c.A41G:p.N14S	2.265e-05	11.97
17	17049402	17:17049402:G:A	G	A	0.000167392	2987	ADD	5.2983	2.31568	10.3928	0.00126506	exonic	MPRIP	.	nonsynonymous_SNV	MPRIP:NM_001364716:exon10:c.G1652A:p.G551D,MPRIP:NM_015134:exon10:c.G1202A:p.G401D,MPRIP:NM_201274:exon10:c.G1202A:p.G401D	5.958e-05	23.8
17	38788582	17:38788582:G:A	G	A	0.000167392	2987	ADD	5.2983	2.31568	10.3928	0.00126506	exonic	SMARCE1	.	synonymous_SNV	SMARCE1:NM_003079:exon8:c.C579T:p.T193T	0.0003	6.543
17	1690114	17:1690114:G:A	G	A	0.000167448	2986	ADD	5.29829	2.31567	10.3928	0.00126509	exonic	SMYD4	.	nonsynonymous_SNV	SMYD4:NM_052928:exon7:c.C1874T:p.A625V	0.0002	17.1
17	73624826	17:73624826:C:T	C	T	0.000167392	2987	ADD	5.29827	2.31566	10.3927	0.00126514	exonic	RECQL5	.	nonsynonymous_SNV	RECQL5:NM_004259:exon17:c.G2506A:p.D836N	0.0002	14.03
17	34854270	17:34854270:A:G	A	G	0.000167392	2987	ADD	5.29823	2.31564	10.3926	0.00126523	exonic	MYO19	.	nonsynonymous_SNV	MYO19:NM_025109:exon22:c.T1997C:p.L666P,MYO19:NM_001163735:exon26:c.T2597C:p.L866P	8.951e-06	24.8
17	57721647	17:57721647:T:A	T	A	0.000167729	2981	ADD	5.29806	2.31554	10.3919	0.00126573	exonic	CLTC	.	nonsynonymous_SNV	CLTC:NM_001288653:exon2:c.T53A:p.L18Q,CLTC:NM_004859:exon2:c.T53A:p.L18Q	0.0001	26.8
17	2201337	17:2201337:C:T	C	T	0.00017001	2941	ADD	5.29746	2.31519	10.3894	0.00126739	exonic	SMG6	.	synonymous_SNV	SMG6:NM_017575:exon3:c.G1860A:p.L620L	0.0001	12.17
3	40553905	3:40553905:C:T	C	T	0.000335008	2985	ADD	4.84233	1.41858	10.3884	0.00126812	exonic	ZNF620	.	nonsynonymous_SNV	ZNF620:NM_175888:exon4:c.C164T:p.T55I	0.0003	3.588
13	33017869	13:33017869:T:C	T	C	0.000502008	2988	ADD	3.78561	1.25268	10.386	0.00126973	exonic	N4BP2L2	.	nonsynonymous_SNV	N4BP2L2:NM_001278432:exon7:c.A760G:p.N254D,N4BP2L2:NM_001320836:exon7:c.A2092G:p.N698D,N4BP2L2:NM_033111:exon7:c.A805G:p.N269D	0.1356	0.338
17	27893602	17:27893602:T:C	T	C	0.00017307	2889	ADD	5.29645	2.31461	10.3856	0.00127005	exonic	ABHD15	.	nonsynonymous_SNV	ABHD15:NM_198147:exon1:c.A383G:p.Q128R	0	22.4
17	7293715	17:7293715:C:T	C	T	0.857722	2959	ADD	-0.705047	0.200837	10.3844	0.00127087	exonic	PLSCR3	.	nonsynonymous_SNV	PLSCR3:NM_001369421:exon6:c.G370A:p.V124I,PLSCR3:NM_001369422:exon6:c.G370A:p.V124I,PLSCR3:NM_001369420:exon7:c.G682A:p.V228I,PLSCR3:NM_001201576:exon8:c.G877A:p.V293I,PLSCR3:NM_001369407:exon8:c.G877A:p.V293I,PLSCR3:NM_020360:exon8:c.G877A:p.V293I	0.8506	0.307
3	66455700	3:66455700:T:A	T	A	0.000167336	2988	ADD	5.29161	2.31334	10.3776	0.00127553	exonic	LRIG1	.	nonsynonymous_SNV	LRIG1:NM_015541:exon9:c.A1082T:p.D361V	0.0006	31
3	77657044	3:77657044:C:G	C	G	0.000167336	2988	ADD	5.29161	2.31334	10.3776	0.00127553	exonic	ROBO2	.	nonsynonymous_SNV	ROBO2:NM_002942:exon21:c.C3232G:p.P1078A,ROBO2:NM_001290039:exon22:c.C3244G:p.P1082A,ROBO2:NM_001290040:exon22:c.C3244G:p.P1082A,ROBO2:NM_001290065:exon22:c.C1453G:p.P485A	0.0024	22.4
3	121238820	3:121238820:G:A	G	A	0.000167336	2988	ADD	5.29161	2.31334	10.3776	0.00127553	exonic	POLQ	.	nonsynonymous_SNV	POLQ:NM_199420:exon9:c.C1366T:p.R456C	9.856e-05	29.9
3	138478113	3:138478113:C:T	C	T	0.000167336	2988	ADD	5.29161	2.31334	10.3776	0.00127553	exonic	PIK3CB	.	nonsynonymous_SNV	PIK3CB:NM_006219:exon3:c.G73A:p.A25T	0.0002	17.9
3	120500101	3:120500101:T:C	T	C	0.000167392	2987	ADD	5.29159	2.31332	10.3775	0.00127559	exonic	GTF2E1	.	synonymous_SNV	GTF2E1:NM_005513:exon5:c.T1104C:p.R368R	8.998e-06	8.03
3	124731673	3:124731673:A:C	A	C	0.000167392	2987	ADD	5.2916	2.31333	10.3775	0.00127559	exonic	HEG1	.	nonsynonymous_SNV	HEG1:NM_020733:exon6:c.T2750G:p.L917W	0	22.5
3	148925278	3:148925278:G:A	G	A	0.000168011	2976	ADD	5.29138	2.3132	10.3767	0.0012762	exonic	CP	.	nonsynonymous_SNV	CP:NM_000096:exon5:c.C908T:p.A303V	0	0.647
13	88330398	13:88330398:C:G	C	G	0.000502176	2987	ADD	4.72759	1.2125	10.3714	0.00127985	exonic	SLITRK5	.	nonsynonymous_SNV	SLITRK5:NM_015567:exon2:c.C2755G:p.P919A	0.0004	21.9
2	25062762	2:25062762:C:T	C	T	0.00016728	2989	ADD	5.28701	2.31161	10.3711	0.00128003	exonic	ADCY3	.	nonsynonymous_SNV	ADCY3:NM_001320613:exon7:c.G1335A:p.M445I,ADCY3:NM_004036:exon7:c.G1335A:p.M445I	0	28.8
2	44445125	2:44445125:C:T	C	T	0.00016728	2989	ADD	5.28701	2.31161	10.3711	0.00128003	exonic	PPM1B	.	synonymous_SNV	PPM1B:NM_177969:exon3:c.C123T:p.G41G,PPM1B:NM_001033557:exon4:c.C984T:p.G328G,PPM1B:NM_002706:exon4:c.C984T:p.G328G,PPM1B:NM_177968:exon4:c.C984T:p.G328G	0.0002	10.31
2	122522918	2:122522918:C:T	C	T	0.000167448	2986	ADD	5.28698	2.31159	10.371	0.00128012	exonic	TSN	.	nonsynonymous_SNV	TSN:NM_004622:exon6:c.C662T:p.T221M	0.0006	19.52
2	152293817	2:152293817:A:G	A	G	0.000167504	2985	ADD	5.28697	2.31159	10.3709	0.00128015	exonic	RIF1	.	nonsynonymous_SNV	RIF1:NM_001177665:exon12:c.A1435G:p.I479V,RIF1:NM_001177663:exon13:c.A1435G:p.I479V,RIF1:NM_001177664:exon13:c.A1435G:p.I479V,RIF1:NM_018151:exon13:c.A1435G:p.I479V	1.791e-05	23.8
2	72723635	2:72723635:A:G	A	G	0.00016756	2984	ADD	5.28689	2.31154	10.3706	0.00128038	exonic	EXOC6B	.	nonsynonymous_SNV	EXOC6B:NM_001321734:exon13:c.T1052C:p.M351T,EXOC6B:NM_001321729:exon14:c.T1391C:p.M464T,EXOC6B:NM_001321730:exon14:c.T1391C:p.M464T,EXOC6B:NM_001321731:exon14:c.T1391C:p.M464T,EXOC6B:NM_001321733:exon14:c.T1391C:p.M464T,EXOC6B:NM_015189:exon14:c.T1391C:p.M464T	6.67e-05	22.2
2	220309851	2:220309851:C:T	C	T	0.00016756	2984	ADD	5.28683	2.3115	10.3704	0.00128053	exonic	SPEG	.	synonymous_SNV	SPEG:NM_005876:exon3:c.C783T:p.S261S	0	12.21
2	173354385	2:173354385:C:T	C	T	0.000168237	2972	ADD	5.28667	2.31141	10.3697	0.00128097	exonic	ITGA6	.	nonsynonymous_SNV	ITGA6:NM_000210:exon20:c.C2678T:p.T893M,ITGA6:NM_001079818:exon20:c.C2678T:p.T893M,ITGA6:NM_001316306:exon20:c.C2321T:p.T774M	8.955e-05	16.09
1	74835130	1:74835130:G:T	G	T	0.000334672	2988	ADD	4.84645	1.42323	10.3677	0.00128242	exonic	FPGT-TNNI3K\x3bTNNI3K	.	nonsynonymous_SNV	TNNI3K:NM_015978:exon16:c.G1528T:p.V510L,FPGT-TNNI3K:NM_001112808:exon18:c.G1870T:p.V624L,FPGT-TNNI3K:NM_001199327:exon18:c.G1870T:p.V624L	0.0007	27
21	47742612	21:47742612:G:T	G	T	0.00016728	2989	ADD	5.29164	2.31796	10.3631	0.00128558	exonic	C21orf58	.	nonsynonymous_SNV	C21orf58:NM_058180:exon1:c.C41A:p.P14Q	0.0007	16
21	31661641	21:31661641:T:C	T	C	0.00016756	2984	ADD	5.2916	2.31794	10.3629	0.00128573	exonic	KRTAP25-1	.	nonsynonymous_SNV	KRTAP25-1:NM_001128598:exon1:c.A168G:p.I56M	5.123e-05	1.903
11	64120307	11:64120307:C:T	C	T	0.000343407	2912	ADD	4.85754	1.42783	10.3625	0.001286	exonic	CCDC88B	.	nonsynonymous_SNV	CCDC88B:NM_032251:exon20:c.C3448T:p.R1150W	6.673e-05	29.5
10	93786394	10:93786394:C:T	C	T	0.00202088	2969	ADD	3.15896	0.750892	10.358	0.00128914	exonic	BTAF1	.	synonymous_SNV	BTAF1:NM_003972:exon36:c.C5121T:p.H1707H	0.0066	1.197
22	50751885	22:50751885:G:A	G	A	0.00016728	2989	ADD	5.28165	2.3114	10.3562	0.00129042	exonic	DENND6B	.	nonsynonymous_SNV	DENND6B:NM_001001794:exon16:c.C1337T:p.T446M	0.0001	21.5
22	40417400	22:40417400:G:A	G	A	0.000167392	2987	ADD	5.2816	2.31137	10.356	0.00129057	exonic	FAM83F	.	nonsynonymous_SNV	FAM83F:NM_138435:exon4:c.G886A:p.E296K	6.536e-05	25.7
12	2983171	12:2983171:G:A	G	A	0.00033456	2989	ADD	4.94512	1.46909	10.3557	0.00129074	exonic	FOXM1	.	synonymous_SNV	FOXM1:NM_001243088:exon2:c.C474T:p.A158A,FOXM1:NM_001243089:exon2:c.C474T:p.A158A,FOXM1:NM_021953:exon2:c.C474T:p.A158A,FOXM1:NM_202002:exon2:c.C474T:p.A158A,FOXM1:NM_202003:exon2:c.C474T:p.A158A	0.0005	2.789
19	6710704	19:6710704:C:T	C	T	0.00016728	2989	ADD	5.28123	2.31162	10.354	0.00129193	exonic	C3	.	synonymous_SNV	C3:NM_000064:exon13:c.G1632A:p.R544R	0	8.919
19	52941176	19:52941176:G:A	G	A	0.000167336	2988	ADD	5.28122	2.31162	10.354	0.00129193	exonic	ZNF534	.	nonsynonymous_SNV	ZNF534:NM_001351679:exon4:c.G379A:p.V127I,ZNF534:NM_001143938:exon5:c.G463A:p.V155I,ZNF534:NM_001143939:exon5:c.G502A:p.V168I	0	13.44
19	6904168	19:6904168:G:GA	G	GA	0.000167392	2987	ADD	5.28122	2.31162	10.354	0.00129196	exonic	ADGRE1	.	frameshift_insertion	ADGRE1:NM_001256254:exon5:c.502dupA:p.D169Rfs*14,ADGRE1:NM_001256252:exon7:c.769dupA:p.D258Rfs*14,ADGRE1:NM_001256253:exon8:c.925dupA:p.D310Rfs*14,ADGRE1:NM_001974:exon8:c.925dupA:p.D310Rfs*14	0	23
19	53116335	19:53116335:G:A	G	A	0.000167392	2987	ADD	5.28122	2.31162	10.354	0.00129196	exonic	ZNF83	.	nonsynonymous_SNV	ZNF83:NM_001277951:exon3:c.C1483T:p.R495C,ZNF83:NM_018300:exon3:c.C1483T:p.R495C,ZNF83:NM_001105552:exon4:c.C1483T:p.R495C,ZNF83:NM_001277946:exon4:c.C1483T:p.R495C,ZNF83:NM_001348016:exon4:c.C1483T:p.R495C,ZNF83:NM_001105550:exon5:c.C1483T:p.R495C,ZNF83:NM_001105551:exon5:c.C1483T:p.R495C,ZNF83:NM_001277948:exon5:c.C1483T:p.R495C,ZNF83:NM_001277949:exon5:c.C1483T:p.R495C,ZNF83:NM_001277952:exon5…	0.0001	13.2
19	56320483	19:56320483:A:T	A	T	0.000167336	2988	ADD	5.28122	2.31162	10.354	0.00129196	exonic	NLRP11	.	nonsynonymous_SNV	NLRP11:NM_001297743:exon2:c.T1196A:p.L399H,NLRP11:NM_145007:exon5:c.T1493A:p.L498H	0	20.6
19	5212502	19:5212502:T:G	T	G	0.000167392	2987	ADD	5.2812	2.31161	10.3539	0.00129199	exonic	PTPRS	.	nonsynonymous_SNV	PTPRS:NM_130853:exon22:c.A3274C:p.N1092H,PTPRS:NM_130855:exon23:c.A3286C:p.N1096H,PTPRS:NM_130854:exon26:c.A4501C:p.N1501H,PTPRS:NM_002850:exon31:c.A4615C:p.N1539H	0	23.7
19	15376403	19:15376403:G:C	G	C	0.000167392	2987	ADD	5.28121	2.31161	10.3539	0.00129199	exonic	BRD4	.	nonsynonymous_SNV	BRD4:NM_001330384:exon5:c.C611G:p.T204S,BRD4:NM_014299:exon5:c.C611G:p.T204S,BRD4:NM_058243:exon5:c.C611G:p.T204S	0	19.46
19	33096777	19:33096777:G:C	G	C	0.000167448	2986	ADD	5.2812	2.31161	10.3539	0.00129199	exonic	ANKRD27	.	synonymous_SNV	ANKRD27:NM_032139:exon24:c.C2457G:p.S819S	1.792e-05	0.324
19	41928626	19:41928626:C:T	C	T	0.000167673	2982	ADD	5.28116	2.31158	10.3537	0.00129214	exonic	BCKDHA	.	nonsynonymous_SNV	BCKDHA:NM_000709:exon7:c.C946T:p.R316W,BCKDHA:NM_001164783:exon7:c.C943T:p.R315W	7.167e-05	27.4
19	619089	19:619089:G:A	G	A	0.000167729	2981	ADD	5.28115	2.31157	10.3537	0.00129217	exonic	POLRMT	.	nonsynonymous_SNV	POLRMT:NM_005035:exon15:c.C3175T:p.R1059C	0.0002	26.8
19	17100563	19:17100563:T:C	T	C	0.000167785	2980	ADD	5.28111	2.31155	10.3535	0.00129229	exonic	CPAMD8	.	nonsynonymous_SNV	CPAMD8:NM_015692:exon13:c.A1285G:p.N429D	0	0.072
1	205589648	1:205589648:C:T	C	T	0.00033456	2989	ADD	4.95236	1.47262	10.353	0.00129262	exonic	ELK4	.	nonsynonymous_SNV	ELK4:NM_001973:exon3:c.G526A:p.A176T,ELK4:NM_021795:exon3:c.G526A:p.A176T	8.956e-06	22.5
19	19822471	19:19822471:A:C	A	C	0.000169033	2958	ADD	5.28068	2.3113	10.3518	0.00129348	exonic	ZNF14	.	nonsynonymous_SNV	ZNF14:NM_021030:exon4:c.T1619G:p.F540C	8.967e-06	24
12	13103097	12:13103097:G:A	G	A	0.00016728	2989	ADD	5.29125	2.32042	10.3517	0.00129354	exonic	GPRC5D	.	synonymous_SNV	GPRC5D:NM_018654:exon1:c.C222T:p.F74F	0.0005	7.153
9	139282955	9:139282955:C:T	C	T	0.000167336	2988	ADD	5.2871	2.31703	10.3517	0.00129357	exonic	SNAPC4	.	nonsynonymous_SNV	SNAPC4:NM_003086:exon10:c.G1064A:p.R355H	0.0006	21
9	139911529	9:139911529:C:T	C	T	0.000167392	2987	ADD	5.28708	2.31702	10.3516	0.0012936	exonic	ABCA2	.	synonymous_SNV	ABCA2:NM_001606:exon19:c.G2601A:p.A867A,ABCA2:NM_212533:exon19:c.G2691A:p.A897A	0.0003	0.268
9	102589075	9:102589075:G:A	G	A	0.000167448	2986	ADD	5.28708	2.31701	10.3516	0.00129363	exonic	NR4A3	.	nonsynonymous_SNV	NR4A3:NM_173200:exon3:c.G23A:p.G8E	6.664e-05	24.5
9	117359862	9:117359862:C:T	C	T	0.000167392	2987	ADD	5.28708	2.31702	10.3516	0.00129363	exonic	ATP6V1G1	.	nonsynonymous_SNV	ATP6V1G1:NM_004888:exon3:c.C196T:p.R66C	0.0004	26.5
19	52447801	19:52447801:A:G	A	G	0.000168805	2962	ADD	5.28061	2.31126	10.3515	0.00129366	exonic	ZNF613	.	nonsynonymous_SNV	ZNF613:NM_001031721:exon6:c.A665G:p.H222R,ZNF613:NM_024840:exon6:c.A557G:p.H186R	0.0004	23.3
9	127300575	9:127300575:A:T	A	T	0.000167448	2986	ADD	5.28706	2.317	10.3515	0.00129369	exonic	NR6A1	.	nonsynonymous_SNV	NR6A1:NM_001278546:exon6:c.T608A:p.F203Y,NR6A1:NM_001489:exon6:c.T605A:p.F202Y,NR6A1:NM_033334:exon6:c.T620A:p.F207Y	0.0002	20.2
9	16436898	9:16436898:T:A	T	A	0.000167336	2988	ADD	5.28703	2.31698	10.3514	0.00129375	exonic	BNC2	.	nonsynonymous_SNV	BNC2:NM_001317939:exon5:c.A1168T:p.M390L,BNC2:NM_001317940:exon5:c.A1009T:p.M337L,BNC2:NM_017637:exon6:c.A1294T:p.M432L	0	19.58
12	91347770	12:91347770:CAG:C	CAG	C	0.00016728	2989	ADD	5.28222	2.31295	10.3514	0.00129375	exonic	CCER1	.	frameshift_deletion	CCER1:NM_152638:exon1:c.748_749del:p.L250Vfs*35	0.0014	20.6
9	131071880	9:131071880:G:A	G	A	0.00016756	2984	ADD	5.28703	2.31699	10.3514	0.00129378	exonic	TRUB2	.	synonymous_SNV	TRUB2:NM_001329861:exon7:c.C813T:p.D271D,TRUB2:NM_001329862:exon8:c.C777T:p.D259D,TRUB2:NM_015679:exon8:c.C945T:p.D315D,TRUB2:NM_001329863:exon9:c.C633T:p.D211D	0.0002	0.057
9	139301684	9:139301684:C:T	C	T	0.00016756	2984	ADD	5.28703	2.31699	10.3514	0.00129378	exonic	ENTR1	.	synonymous_SNV	ENTR1:NM_001039708:exon3:c.G513A:p.P171P,ENTR1:NM_006643:exon4:c.G663A:p.P221P,ENTR1:NM_001039707:exon5:c.G732A:p.P244P	0.0009	2.131
12	88379657	12:88379657:T:C	T	C	0.000167336	2988	ADD	5.28221	2.31294	10.3514	0.00129378	exonic	C12orf50	.	nonsynonymous_SNV	C12orf50:NM_001363616:exon10:c.A979G:p.N327D,C12orf50:NM_152589:exon11:c.A1096G:p.N366D	2.696e-05	14.57
9	135553557	9:135553557:C:G	C	G	0.00016756	2984	ADD	5.28701	2.31698	10.3513	0.00129381	exonic	GTF3C4	.	nonsynonymous_SNV	GTF3C4:NM_012204:exon2:c.C551G:p.A184G	0	24.1
9	26887344	9:26887344:T:G	T	G	0.00016756	2984	ADD	5.28692	2.31692	10.351	0.00129405	exonic	CAAP1	.	nonsynonymous_SNV	CAAP1:NM_001167575:exon2:c.A36C:p.K12N,CAAP1:NM_024828:exon2:c.A471C:p.K157N	0.0002	19.01
9	140069698	9:140069698:C:T	C	T	0.000168805	2962	ADD	5.28667	2.31677	10.3499	0.00129482	exonic	ANAPC2	.	synonymous_SNV	ANAPC2:NM_013366:exon12:c.G2247A:p.E749E	0.0081	10.23
12	76765230	12:76765230:C:G	C	G	0.000168805	2962	ADD	5.28179	2.3127	10.3497	0.00129497	exonic	OSBPL8	.	nonsynonymous_SNV	OSBPL8:NM_001319655:exon16:c.G1977C:p.E659D,OSBPL8:NM_001003712:exon18:c.G1926C:p.E642D,OSBPL8:NM_001319653:exon19:c.G2043C:p.E681D,OSBPL8:NM_020841:exon19:c.G2052C:p.E684D,OSBPL8:NM_001319652:exon21:c.G1926C:p.E642D	9.085e-06	22.3
12	862737	12:862737:T:G	T	G	0.000168407	2969	ADD	5.28179	2.31269	10.3496	0.00129506	exonic	WNK1	.	synonymous_SNV	WNK1:NM_001184985:exon1:c.T6G:p.S2S,WNK1:NM_014823:exon1:c.T6G:p.S2S,WNK1:NM_018979:exon1:c.T6G:p.S2S,WNK1:NM_213655:exon1:c.T6G:p.S2S	0.0001	9.472
12	133225617	12:133225617:C:T	C	T	0.000170474	2933	ADD	5.28112	2.31231	10.3469	0.00129688	exonic	POLE	.	synonymous_SNV	POLE:NM_006231:exon32:c.G4047A:p.A1349A	0.0004	3.067
12	43846466	12:43846466:C:G	C	G	0.000172058	2906	ADD	5.28082	2.31213	10.3458	0.00129772	exonic	ADAMTS20	.	nonsynonymous_SNV	ADAMTS20:NM_025003:exon13:c.G1793C:p.R598P	0	26.1
21	45750444	21:45750444:C:T	C	T	0.000340716	2935	ADD	4.89425	1.44723	10.3433	0.00129948	exonic	CFAP410	.	nonsynonymous_SNV	CFAP410:NM_001271441:exon6:c.G901A:p.G301R	0.0094	0.001
16	11219962	16:11219962:C:T	C	T	0.000335233	2983	ADD	4.9003	1.45037	10.3423	0.0013002	exonic	CLEC16A	.	nonsynonymous_SNV	CLEC16A:NM_001243403:exon21:c.C2546T:p.T849I,CLEC16A:NM_015226:exon21:c.C2600T:p.T867I	0.0001	27.6
22	44583726	22:44583726:T:C	T	C	0.00016728	2989	ADD	5.2785	2.31339	10.3389	0.00130254	exonic	PARVG	.	nonsynonymous_SNV	PARVG:NM_001137605:exon5:c.T215C:p.M72T,PARVG:NM_022141:exon5:c.T215C:p.M72T	0	23
22	38468529	22:38468529:C:G	C	G	0.000168237	2972	ADD	5.2779	2.31304	10.3366	0.00130422	exonic	PICK1	.	nonsynonymous_SNV	PICK1:NM_001039583:exon9:c.C602G:p.P201R,PICK1:NM_001039584:exon9:c.C602G:p.P201R,PICK1:NM_012407:exon9:c.C602G:p.P201R	0	24.4
22	29915105	22:29915105:G:C	G	C	0.00016728	2989	ADD	5.27408	2.31165	10.3329	0.00130677	exonic	THOC5	.	nonsynonymous_SNV	THOC5:NM_001002879:exon15:c.C1379G:p.T460R,THOC5:NM_003678:exon15:c.C1379G:p.T460R,THOC5:NM_001002877:exon16:c.C1379G:p.T460R,THOC5:NM_001002878:exon16:c.C1379G:p.T460R	6.663e-05	22.2
22	37318309	22:37318309:C:A	C	A	0.000167729	2981	ADD	5.27395	2.31156	10.3324	0.00130716	exonic	CSF2RB	.	nonsynonymous_SNV	CSF2RB:NM_000395:exon2:c.C60A:p.S20R	0.0121	0.019
13	101763529	13:101763529:G:A	G	A	0.00252186	2974	ADD	2.55512	0.655639	10.3314	0.00130786	exonic	NALCN	.	synonymous_SNV	NALCN:NM_001350750:exon18:c.C2154T:p.P718P,NALCN:NM_001350751:exon18:c.C2154T:p.P718P,NALCN:NM_001350749:exon19:c.C2241T:p.P747P,NALCN:NM_052867:exon19:c.C2241T:p.P747P,NALCN:NM_001350748:exon20:c.C2328T:p.P776P	0.0104	1.332
12	56385915	12:56385915:GGGA:G	GGGA	G	0.00200803	2988	ADD	2.72875	0.721182	10.3266	0.00131123	exonic	RAB5B	.	nonframeshift_deletion	RAB5B:NM_001252037:exon5:c.445_447del:p.G150del,RAB5B:NM_001252036:exon6:c.568_570del:p.G191del,RAB5B:NM_002868:exon6:c.568_570del:p.G191del	0.0084	19.68
6	146755501	6:146755501:C:T	C	T	0.000334784	2987	ADD	5.1353	1.56559	10.3246	0.00131268	exonic	GRM1	.	synonymous_SNV	GRM1:NM_001278064:exon8:c.C3154T:p.L1052L	0.0002	10.45
6	87970251	6:87970251:A:G	A	G	0.000534378	2807	ADD	4.78491	1.27667	10.324	0.00131311	exonic	ZNF292	.	nonsynonymous_SNV	ZNF292:NM_015021:exon8:c.A6904G:p.M2302V,ZNF292:NM_001351444:exon9:c.A6484G:p.M2162V	0.004	16.64
11	111631611	11:111631611:T:C	T	C	0.000167336	2988	ADD	5.27315	2.31583	10.3186	0.00131695	exonic	PPP2R1B	.	synonymous_SNV	PPP2R1B:NM_181700:exon2:c.A279G:p.T93T,PPP2R1B:NM_001177562:exon4:c.A471G:p.T157T,PPP2R1B:NM_002716:exon4:c.A471G:p.T157T,PPP2R1B:NM_181699:exon4:c.A471G:p.T157T	8.952e-06	9.457
11	124761297	11:124761297:TG:T	TG	T	0.000167336	2988	ADD	5.27314	2.31582	10.3186	0.00131698	exonic	ROBO4	.	frameshift_deletion	ROBO4:NM_001301088:exon12:c.1410delC:p.S471Afs*58,ROBO4:NM_019055:exon12:c.1845delC:p.S616Afs*58	0	32
11	65789030	11:65789030:C:T	C	T	0.000167448	2986	ADD	5.2731	2.31579	10.3183	0.00131713	exonic	CATSPER1	.	nonsynonymous_SNV	CATSPER1:NM_053054:exon4:c.G1628A:p.R543Q	9.016e-06	24.8
11	73141788	11:73141788:G:A	G	A	0.00016756	2984	ADD	5.27304	2.31576	10.3181	0.00131732	exonic	FAM168A	.	nonsynonymous_SNV	FAM168A:NM_001286050:exon3:c.C98T:p.A33V,FAM168A:NM_001286051:exon3:c.C98T:p.A33V,FAM168A:NM_015159:exon3:c.C98T:p.A33V	0.0004	24.1
13	24798120	13:24798120:T:C	T	C	0.470641	2810	ADD	-0.57443	0.173957	10.3181	0.00131732	exonic	SPATA13	.	synonymous_SNV	SPATA13:NM_001166271:exon2:c.T1053C:p.L351L,SPATA13:NM_001286792:exon4:c.T1239C:p.L413L	0.6607	0.677
11	68575098	11:68575098:A:G	A	G	0.000167842	2979	ADD	5.27298	2.31572	10.3179	0.0013175	exonic	CPT1A	.	nonsynonymous_SNV	CPT1A:NM_001031847:exon4:c.T290C:p.M97T,CPT1A:NM_001876:exon4:c.T290C:p.M97T	0.0001	20.6
11	57505856	11:57505856:A:G	A	G	0.000334784	2987	ADD	4.88245	1.44698	10.3144	0.00131996	exonic	TMX2	.	nonsynonymous_SNV	TMX2:NM_001144012:exon3:c.A281G:p.Y94C,TMX2:NM_001347890:exon4:c.A395G:p.Y132C,TMX2:NM_001347891:exon4:c.A311G:p.Y104C,TMX2:NM_001347892:exon4:c.A188G:p.Y63C,TMX2:NM_001347893:exon4:c.A113G:p.Y38C,TMX2:NM_001347894:exon4:c.A113G:p.Y38C,TMX2:NM_001347895:exon4:c.A113G:p.Y38C,TMX2:NM_001347896:exon4:c.A113G:p.Y38C,TMX2:NM_001347898:exon4:c.A395G:p.Y132C,TMX2:NM_015959:exon4:c.A395G:p.Y132C	0.0003	26
11	57799136	11:57799136:C:T	C	T	0.000334784	2987	ADD	4.88245	1.44698	10.3144	0.00131996	exonic	OR6Q1	.	nonsynonymous_SNV	OR6Q1:NM_001005186:exon1:c.C712T:p.R238C	0.0006	24.2
18	9254720	18:9254720:C:T	C	T	0.000352237	2839	ADD	4.83659	1.42541	10.3115	0.00132206	exonic	ANKRD12	.	synonymous_SNV	ANKRD12:NM_001083625:exon8:c.C1386T:p.N462N,ANKRD12:NM_001204056:exon8:c.C1386T:p.N462N,ANKRD12:NM_015208:exon9:c.C1455T:p.N485N	0.0471	9.02
18	44068986	18:44068986:G:A	G	A	0.000167336	2988	ADD	5.26725	2.31342	10.3057	0.0013262	exonic	LOXHD1	.	nonsynonymous_SNV	LOXHD1:NM_001145473:exon6:c.C715T:p.R239C,LOXHD1:NM_001173129:exon6:c.C715T:p.R239C,LOXHD1:NM_001308013:exon18:c.C2377T:p.R793C,LOXHD1:NM_001145472:exon20:c.C2665T:p.R889C,LOXHD1:NM_144612:exon37:c.C5812T:p.R1938C	0.0003	27.9
2	179446666	2:179446666:C:T	C	T	0.000335008	2985	ADD	4.81934	1.42099	10.3043	0.00132718	exonic	TTN	.	nonsynonymous_SNV	TTN:NM_003319:exon143:c.G39235A:p.A13079T,TTN:NM_133432:exon144:c.G39610A:p.A13204T,TTN:NM_133437:exon144:c.G39811A:p.A13271T,TTN:NM_133378:exon264:c.G58726A:p.A19576T,TTN:NM_001256850:exon265:c.G61507A:p.A20503T,TTN:NM_001267550:exon315:c.G66430A:p.A22144T	0.0012	22.8
3	49878480	3:49878480:G:A	G	A	0.000167336	2988	ADD	5.26315	2.31167	10.3007	0.00132978	exonic	TRAIP	.	nonsynonymous_SNV	TRAIP:NM_005879:exon8:c.C643T:p.R215W	3.583e-05	25
3	63983364	3:63983364:G:A	G	A	0.000167336	2988	ADD	5.26315	2.31167	10.3007	0.00132978	splicing	ATXN7	NM_001177387:exon12:c.2728+1G>A	.	.	3.407e-05	32
3	170884938	3:170884938:G:A	G	A	0.00016728	2989	ADD	5.26316	2.31167	10.3007	0.00132978	exonic	TNIK	.	nonsynonymous_SNV	TNIK:NM_001161560:exon10:c.C895T:p.R299C,TNIK:NM_001161561:exon10:c.C895T:p.R299C,TNIK:NM_001161562:exon10:c.C895T:p.R299C,TNIK:NM_001161563:exon10:c.C895T:p.R299C,TNIK:NM_001161564:exon10:c.C895T:p.R299C,TNIK:NM_001161565:exon10:c.C895T:p.R299C,TNIK:NM_001161566:exon10:c.C895T:p.R299C,TNIK:NM_015028:exon10:c.C895T:p.R299C	0.0003	32
3	164906721	3:164906721:A:G	A	G	0.000167336	2988	ADD	5.26314	2.31166	10.3007	0.00132981	exonic	SLITRK3	.	nonsynonymous_SNV	SLITRK3:NM_001318810:exon2:c.T1898C:p.I633T,SLITRK3:NM_001318811:exon2:c.T1898C:p.I633T,SLITRK3:NM_014926:exon2:c.T1898C:p.I633T	0	0.011
3	52839826	3:52839826:A:G	A	G	0.000167504	2985	ADD	5.26312	2.31165	10.3006	0.00132987	exonic	ITIH3	.	nonsynonymous_SNV	ITIH3:NM_002217:exon16:c.A1876G:p.T626A	8.966e-06	6.314
11	70200529	11:70200529:C:T	C	T	0.113481	2930	ADD	0.731022	0.206207	10.3006	0.0013299	exonic	PPFIA1	.	synonymous_SNV	PPFIA1:NM_003626:exon17:c.C2286T:p.V762V,PPFIA1:NM_177423:exon17:c.C2286T:p.V762V	0.2235	10.57
3	111639157	3:111639157:G:T	G	T	0.000167504	2985	ADD	5.26308	2.31163	10.3005	0.00132996	exonic	PHLDB2	.	nonsynonymous_SNV	PHLDB2:NM_001134438:exon5:c.G1892T:p.G631V,PHLDB2:NM_001134439:exon5:c.G1892T:p.G631V,PHLDB2:NM_145753:exon5:c.G1892T:p.G631V,PHLDB2:NM_001134437:exon6:c.G1973T:p.G658V	0	32
3	150840625	3:150840625:A:G	A	G	0.000167504	2985	ADD	5.26306	2.31161	10.3003	0.00133006	exonic	MED12L	.	nonsynonymous_SNV	MED12L:NM_053002:exon3:c.A260G:p.Q87R	0	23.3
3	130340705	3:130340705:G:T	G	T	0.000167616	2983	ADD	5.26304	2.31161	10.3003	0.00133009	exonic	COL6A6	.	nonsynonymous_SNV	COL6A6:NM_001102608:exon23:c.G4856T:p.R1619L	0	4.775
17	26851609	17:26851609:C:A	C	A	0.000335345	2982	ADD	4.91314	1.46291	10.2984	0.00133147	exonic	FOXN1	.	nonsynonymous_SNV	FOXN1:NM_003593:exon2:c.C212A:p.A71E,FOXN1:NM_001369369:exon3:c.C212A:p.A71E	9.006e-06	23.2
3	37034299	3:37034299:G:A	G	A	0.000171585	2914	ADD	5.26195	2.31096	10.2958	0.00133337	exonic	EPM2AIP1	.	synonymous_SNV	EPM2AIP1:NM_014805:exon1:c.C270T:p.S90S	2.693e-05	2.497
18	67781819	18:67781819:AAC:A	AAC	A	0.000176554	2832	ADD	5.26442	2.31176	10.294	0.0013346	exonic	RTTN	.	frameshift_deletion	RTTN:NM_001318520:exon26:c.807_808del:p.L270Rfs*16,RTTN:NM_173630:exon27:c.3543_3544del:p.L1182Rfs*16	0	31
15	101551007	15:101551007:C:A	C	A	0.00753516	2986	ADD	1.87425	0.480755	10.2921	0.00133601	exonic	LRRK1	.	nonsynonymous_SNV	LRRK1:NM_024652:exon9:c.C1246A:p.L416M	0.0169	23.2
8	30704352	8:30704352:C:T	C	T	0.000167448	2986	ADD	5.26078	2.31343	10.2866	0.00134002	exonic	TEX15	.	nonsynonymous_SNV	TEX15:NM_001350162:exon8:c.G3331A:p.G1111R	6.285e-05	0.456
8	37795185	8:37795185:C:T	C	T	0.000167448	2986	ADD	5.26078	2.31343	10.2866	0.00134002	exonic	GOT1L1	.	nonsynonymous_SNV	GOT1L1:NM_152413:exon3:c.G380A:p.R127H	0.0219	6.116
8	12594448	8:12594448:C:T	C	T	0.000167504	2985	ADD	5.26073	2.3134	10.2863	0.0013402	exonic	LONRF1	.	nonsynonymous_SNV	LONRF1:NM_001329976:exon5:c.G1315A:p.V439I,LONRF1:NM_152271:exon5:c.G1315A:p.V439I	6.672e-05	15.76
2	29293681	2:29293681:C:T	C	T	0.00686767	2985	ADD	2.09645	0.523906	10.278	0.00134626	exonic	PCARE	.	synonymous_SNV	PCARE:NM_001029883:exon1:c.G3447A:p.P1149P	0.0069	0.016
8	144801320	8:144801320:C:T	C	T	0.000174155	2871	ADD	5.25863	2.31217	10.2777	0.00134648	exonic	MAPK15	.	nonsynonymous_SNV	MAPK15:NM_139021:exon6:c.C575T:p.S192L	0.0001	23.3
15	81591866	15:81591866:T:C	T	C	0.0008364	2989	ADD	4.32668	1.11973	10.2767	0.00134719	exonic	IL16	.	synonymous_SNV	IL16:NM_004513:exon2:c.T96C:p.H32H,IL16:NM_001172128:exon14:c.T2199C:p.H733H,IL16:NM_001352686:exon14:c.T2352C:p.H784H,IL16:NM_172217:exon14:c.T2199C:p.H733H,IL16:NM_001352684:exon15:c.T369C:p.H123H,IL16:NM_001352685:exon15:c.T1689C:p.H563H	0.0033	0.347
9	138664718	9:138664718:G:A	G	A	0.000879972	2841	ADD	3.56388	1.06452	10.2749	0.0013485	exonic	KCNT1	.	synonymous_SNV	KCNT1:NM_001272003:exon18:c.G2031A:p.L677L,KCNT1:NM_020822:exon19:c.G2166A:p.L722L	0.0019	9.647
6	24445829	6:24445829:G:A	G	A	0.0961022	2976	ADD	0.809028	0.227714	10.2694	0.00135251	exonic	GPLD1	.	synonymous_SNV	GPLD1:NM_001503:exon20:c.C1965T:p.H655H	0.4346	0.003
10	26457703	10:26457703:G:A	G	A	0.000172354	2901	ADD	5.25299	2.31056	10.2687	0.00135307	exonic	MYO3A	.	synonymous_SNV	MYO3A:NM_017433:exon28:c.G3174A:p.K1058K	0	10.63
7	2751987	7:2751987:G:A	G	A	0.00100469	2986	ADD	3.26301	0.868535	10.264	0.00135653	exonic	AMZ1	.	nonsynonymous_SNV	AMZ1:NM_001284355:exon6:c.G802A:p.G268S	0.0371	0.026
4	17524629	4:17524629:C:T	C	T	0.000167336	2988	ADD	5.25303	2.31348	10.2637	0.00135669	exonic	CLRN2	.	synonymous_SNV	CLRN2:NM_001079827:exon2:c.C396T:p.S132S	0.0002	8.396
4	37448553	4:37448553:G:A	G	A	0.00016728	2989	ADD	5.25304	2.31348	10.2638	0.00135669	exonic	NWD2	.	nonsynonymous_SNV	NWD2:NM_001144990:exon7:c.G4943A:p.R1648H	0.0006	27.6
4	129792747	4:129792747:G:T	G	T	0.000167673	2982	ADD	5.25286	2.31338	10.263	0.00135725	exonic	JADE1	.	nonsynonymous_SNV	JADE1:NM_001287437:exon11:c.G1823T:p.R608I,JADE1:NM_001287439:exon11:c.G1859T:p.R620I,JADE1:NM_001287440:exon11:c.G1859T:p.R620I,JADE1:NM_001287442:exon11:c.G1859T:p.R620I,JADE1:NM_001287443:exon11:c.G1859T:p.R620I,JADE1:NM_199320:exon11:c.G1859T:p.R620I	0	13.3
4	155411253	4:155411253:T:C	T	C	0.000168634	2965	ADD	5.25262	2.31323	10.262	0.00135797	exonic	DCHS2	.	nonsynonymous_SNV	DCHS2:NM_001142552:exon1:c.A1255G:p.T419A,DCHS2:NM_001358235:exon1:c.A1255G:p.T419A	0	22.4
2	152486115	2:152486115:C:T	C	T	0.000334784	2987	ADD	4.81017	1.42325	10.2611	0.00135866	exonic	NEB	.	nonsynonymous_SNV	NEB:NM_004543:exon65:c.G9040A:p.D3014N,NEB:NM_001164507:exon68:c.G9769A:p.D3257N,NEB:NM_001164508:exon68:c.G9769A:p.D3257N,NEB:NM_001271208:exon68:c.G9769A:p.D3257N	0.0001	29.4
2	152128163	2:152128163:C:G	C	G	0.000337382	2964	ADD	4.80982	1.42325	10.2584	0.00136063	exonic	NMI	.	nonsynonymous_SNV	NMI:NM_004688:exon7:c.G718C:p.E240Q	2.704e-05	18.13
1	161185124	1:161185124:G:A	G	A	0.00150552	2989	ADD	3.19474	0.796516	10.2566	0.00136195	exonic	FCER1G	.	nonsynonymous_SNV	FCER1G:NM_004106:exon1:c.G13A:p.V5M	0.0014	15.4
8	30977876	8:30977876:G:GGTC	G	GGTC	0.000335458	2981	ADD	4.8217	1.42923	10.2534	0.00136433	exonic	WRN	.	nonframeshift_insertion	WRN:NM_000553:exon21:c.2566_2567insGTC:p.R857_D858insR	0.0002	22.1
17	7097781	17:7097781:G:A	G	A	0.000335121	2984	ADD	4.79211	1.41686	10.2509	0.00136619	exonic	DLG4	.	synonymous_SNV	DLG4:NM_001321076:exon11:c.C1155T:p.C385C,DLG4:NM_001321077:exon11:c.C1155T:p.C385C,DLG4:NM_001369566:exon11:c.C1254T:p.C418C,DLG4:NM_001128827:exon12:c.C1326T:p.C442C,DLG4:NM_001321075:exon12:c.C1335T:p.C445C,DLG4:NM_001321074:exon14:c.C1455T:p.C485C,DLG4:NM_001365:exon14:c.C1464T:p.C488C	0.0087	11.81
12	16135315	12:16135315:A:G	A	G	0.00016728	2989	ADD	5.24779	2.31373	10.2486	0.00136792	exonic	DERA	.	synonymous_SNV	DERA:NM_015954:exon6:c.A582G:p.G194G	5.962e-05	12.74
12	120576547	12:120576547:G:A	G	A	0.000167336	2988	ADD	5.24777	2.31372	10.2485	0.00136795	exonic	GCN1	.	synonymous_SNV	GCN1:NM_006836:exon46:c.C6108T:p.I2036I	0.0013	8.974
12	47471654	12:47471654:C:G	C	G	0.000167504	2985	ADD	5.24776	2.31371	10.2484	0.00136801	exonic	AMIGO2	.	nonsynonymous_SNV	AMIGO2:NM_181847:exon2:c.G1132C:p.V378L,AMIGO2:NM_001143668:exon3:c.G1132C:p.V378L,AMIGO2:NM_001370299:exon3:c.G1132C:p.V378L	4.476e-05	22.4
12	113554907	12:113554907:C:A	C	A	0.000167616	2983	ADD	5.24767	2.31366	10.2481	0.00136826	exonic	RASAL1	.	synonymous_SNV	RASAL1:NM_001193521:exon8:c.G702T:p.L234L,RASAL1:NM_001301202:exon8:c.G702T:p.L234L,RASAL1:NM_001193520:exon9:c.G702T:p.L234L,RASAL1:NM_004658:exon9:c.G702T:p.L234L	0	12.66
12	55886747	12:55886747:A:T	A	T	0.000168067	2975	ADD	5.24762	2.31363	10.2479	0.00136842	exonic	OR6C68	.	nonsynonymous_SNV	OR6C68:NM_001005519:exon1:c.A586T:p.M196L	0	8.697
12	53709564	12:53709564:C:T	C	T	0.00016756	2984	ADD	5.24759	2.31361	10.2478	0.00136852	exonic	AAAS	.	nonsynonymous_SNV	AAAS:NM_001173466:exon3:c.G254A:p.R85H,AAAS:NM_015665:exon3:c.G254A:p.R85H	0.0006	22.7
12	111342490	12:111342490:A:C	A	C	0.000167504	2985	ADD	5.24759	2.31361	10.2478	0.00136852	exonic	CCDC63	.	nonsynonymous_SNV	CCDC63:NM_001286244:exon9:c.A1204C:p.I402L,CCDC63:NM_001286243:exon10:c.A1321C:p.I441L,CCDC63:NM_152591:exon11:c.A1441C:p.I481L	0.1063	0.001
14	81837370	14:81837370:T:A	T	A	0.000334784	2987	ADD	4.78447	1.415	10.2425	0.00137237	exonic	STON2	.	nonsynonymous_SNV	STON2:NM_001256430:exon5:c.A533T:p.E178V,STON2:NM_001366849:exon5:c.A533T:p.E178V,STON2:NM_001366850:exon5:c.A533T:p.E178V	0.0002	25.4
5	148624571	5:148624571:C:A	C	A	0.000334896	2986	ADD	4.79418	1.41922	10.241	0.00137354	exonic	ABLIM3	.	synonymous_SNV	ABLIM3:NM_001301028:exon11:c.C1146A:p.S382S,ABLIM3:NM_001370418:exon11:c.C1146A:p.S382S,ABLIM3:NM_001345860:exon12:c.C1146A:p.S382S,ABLIM3:NM_001345861:exon12:c.C1194A:p.S398S,ABLIM3:NM_001345859:exon13:c.C1194A:p.S398S,ABLIM3:NM_001345858:exon14:c.C1332A:p.S444S,ABLIM3:NM_001370417:exon14:c.C1380A:p.S460S,ABLIM3:NM_001301015:exon15:c.C1479A:p.S493S,ABLIM3:NM_001301018:exon15:c.C1380A:p.S460S,ABL…	0.0613	8.152
1	152083939	1:152083939:CTCTCCTCCTCGCGCTTCAGCAGCTGATCGCGCCTCTCCTCCTGCTCGCGCTTCAGCCGCTGCTCTCGCCTCTCCTGCTCGAGCCTCT:C	CTCTCCTCCTCGCGCTTCAGCAGCTGATCGCGCCTCTCCTCCTGCTCGCGCTTCAGCCGCTGCTCTCGCCTCTCCTGCTCGAGCCTCT	C	0.000338409	2955	ADD	5.00875	1.51673	10.2409	0.00137357	exonic	TCHH	.	nonframeshift_deletion	TCHH:NM_007113:exon3:c.1667_1753del:p.K556_E584del	0.0013	16.39
1	92979335	1:92979335:C:T	C	T	0.000334784	2987	ADD	4.85779	1.44757	10.2384	0.0013755	exonic	EVI5	.	nonsynonymous_SNV	EVI5:NM_005665:exon18:c.G2311A:p.A771T,EVI5:NM_001308248:exon19:c.G2344A:p.A782T,EVI5:NM_001350197:exon20:c.G2359A:p.A787T	0.0127	0.002
11	102661164	11:102661164:C:T	C	T	0.000335008	2985	ADD	4.9396	1.48543	10.2361	0.00137718	exonic	MMP1	.	stopgain	MMP1:NM_001145938:exon10:c.G1191A:p.W397X,MMP1:NM_002421:exon10:c.G1389A:p.W463X	0.0024	48
5	149459839	5:149459839:G:C	G	C	0.000669792	2986	ADD	4.56026	1.30781	10.2358	0.00137743	exonic	CSF1R	.	nonsynonymous_SNV	CSF1R:NM_001288705:exon3:c.C368G:p.A123G,CSF1R:NM_005211:exon4:c.C368G:p.A123G,CSF1R:NM_001349736:exon5:c.C368G:p.A123G	0.0084	13.89
6	88311578	6:88311578:G:A	G	A	0.000334672	2988	ADD	4.86904	1.45371	10.2319	0.00138032	exonic	ORC3	.	synonymous_SNV	ORC3:NM_012381:exon3:c.G156A:p.Q52Q,ORC3:NM_181837:exon3:c.G156A:p.Q52Q	0.0033	8.785
17	76802344	17:76802344:C:T	C	T	0.018731	2963	ADD	1.37911	0.370887	10.2207	0.00138874	exonic	USP36	.	nonsynonymous_SNV	USP36:NM_001321291:exon15:c.G2110A:p.G704S	0.0207	16.4
20	334223	20:334223:G:A	G	A	0.00016728	2989	ADD	5.24272	2.31745	10.2201	0.00138918	exonic	NRSN2	.	nonsynonymous_SNV	NRSN2:NM_001323680:exon4:c.G559A:p.A187T,NRSN2:NM_001323681:exon4:c.G559A:p.A187T,NRSN2:NM_001323685:exon4:c.G559A:p.A187T,NRSN2:NM_024958:exon4:c.G559A:p.A187T,NRSN2:NM_001323682:exon5:c.G559A:p.A187T,NRSN2:NM_001323683:exon5:c.G559A:p.A187T,NRSN2:NM_001323684:exon5:c.G559A:p.A187T,NRSN2:NM_001323679:exon6:c.G427A:p.A143T	0.0006	0.57
20	2846896	20:2846896:C:T	C	T	0.00016728	2989	ADD	5.24272	2.31745	10.2201	0.00138918	exonic	VPS16	.	synonymous_SNV	VPS16:NM_080413:exon19:c.C1878T:p.Y626Y,VPS16:NM_022575:exon23:c.C2310T:p.Y770Y	0.0012	1.44
20	34505500	20:34505500:G:A	G	A	0.00016728	2989	ADD	5.24272	2.31745	10.2201	0.00138918	exonic	PHF20	.	synonymous_SNV	PHF20:NM_016436:exon13:c.G1920A:p.E640E	2.687e-05	9.459
20	44004020	20:44004020:T:C	T	C	0.00016728	2989	ADD	5.24272	2.31745	10.2201	0.00138918	exonic	TP53TG5	.	nonsynonymous_SNV	TP53TG5:NM_014477:exon4:c.A427G:p.T143A	0.0039	0.001
20	49236573	20:49236573:C:T	C	T	0.00016728	2989	ADD	5.24272	2.31745	10.2201	0.00138918	exonic	RIPOR3	.	synonymous_SNV	RIPOR3:NM_001290268:exon3:c.G219A:p.P73P,RIPOR3:NM_080829:exon3:c.G207A:p.P69P	5.958e-05	9.137
20	61987409	20:61987409:C:G	C	G	0.00016728	2989	ADD	5.24272	2.31745	10.2201	0.00138918	exonic	CHRNA4	.	nonsynonymous_SNV	CHRNA4:NM_000744:exon4:c.G301C:p.D101H	0	24.7
20	62597841	20:62597841:C:T	C	T	0.00016728	2989	ADD	5.24272	2.31745	10.2201	0.00138918	exonic	ZNF512B	.	synonymous_SNV	ZNF512B:NM_020713:exon5:c.G687A:p.P229P	0.0002	0.103
20	42333964	20:42333964:C:T	C	T	0.000167392	2987	ADD	5.24271	2.31745	10.2201	0.00138922	exonic	MYBL2	.	nonsynonymous_SNV	MYBL2:NM_001278610:exon8:c.C1399T:p.R467W,MYBL2:NM_002466:exon9:c.C1471T:p.R491W	0	26.9
20	259888	20:259888:G:A	G	A	0.000168067	2975	ADD	5.2425	2.31732	10.2192	0.00138989	exonic	C20orf96	.	synonymous_SNV	C20orf96:NM_080571:exon5:c.C387T:p.I129I,C20orf96:NM_153269:exon5:c.C390T:p.I130I	9.764e-05	1.106
13	51921337	13:51921337:C:A	C	A	0.000334672	2988	ADD	5.01097	1.52341	10.2107	0.00139627	exonic	SERPINE3	.	nonsynonymous_SNV	SERPINE3:NM_001101320:exon3:c.C667A:p.P223T	0.0059	25.3
18	12698983	18:12698983:C:T	C	T	0.000334896	2986	ADD	4.59482	2.09856	10.1978	0.00140608	exonic	CEP76	.	nonsynonymous_SNV	CEP76:NM_024899:exon4:c.G515A:p.S172N	0.1159	15.28
19	38899415	19:38899415:C:CG	C	CG	0.000334896	2986	ADD	4.96391	2.18817	10.1972	0.00140653	exonic	FAM98C	.	frameshift_insertion	FAM98C:NM_001351675:exon6:c.698dupG:p.R236Pfs*4,FAM98C:NM_174905:exon8:c.944dupG:p.R318Pfs*4	0.0006	34
1	207760829	1:207760829:C:T	C	T	0.000334672	2988	ADD	4.76763	1.41607	10.1846	0.00141622	exonic	CR1	.	nonsynonymous_SNV	CR1:NM_000573:exon26:c.C4279T:p.R1427C,CR1:NM_000651:exon34:c.C5629T:p.R1877C	0.001	16.48
8	28574730	8:28574730:C:T	C	T	0.000334784	2987	ADD	4.78855	1.42675	10.1746	0.00142387	exonic	EXTL3	.	nonsynonymous_SNV	EXTL3:NM_001440:exon3:c.C1154T:p.A385V	3.59e-05	24.5
23	2835964	X:2835964:G:A	G	A	0.110287	2965	ADD	-2.16466	0.577515	10.1731	0.00142502	exonic	ARSD	.	synonymous_SNV	ARSD:NM_001669:exon5:c.C744T:p.F248F,ARSD:NM_009589:exon5:c.C744T:p.F248F	0.0024	NA
15	75130814	15:75130814:A:G	A	G	0.00150552	2989	ADD	3.2827	0.866032	10.1633	0.00143265	exonic	ULK3	.	synonymous_SNV	ULK3:NM_001099436:exon11:c.T1134C:p.A378A,ULK3:NM_001284364:exon11:c.T1134C:p.A378A,ULK3:NM_001284365:exon11:c.T783C:p.A261A	0.0016	11.6
6	106968830	6:106968830:T:C	T	C	0.000334896	2986	ADD	4.87015	1.46553	10.1566	0.00143787	exonic	CRYBG1	.	synonymous_SNV	CRYBG1:NM_001624:exon2:c.T2523C:p.S841S,CRYBG1:NM_001371242:exon4:c.T3747C:p.S1249S	8.96e-06	0.985
16	4414835	16:4414835:G:A	G	A	0.000520291	2883	ADD	4.65367	1.20792	10.1527	0.00144089	exonic	CORO7\x3bCORO7-PAM16	.	nonsynonymous_SNV	CORO7:NM_001201473:exon10:c.C730T:p.R244C,CORO7:NM_001201472:exon12:c.C931T:p.R311C,CORO7-PAM16:NM_001201479:exon12:c.C985T:p.R329C,CORO7:NM_001351729:exon12:c.C325T:p.R109C,CORO7:NM_024535:exon12:c.C985T:p.R329C	0.0012	25.8
22	17600313	22:17600313:C:T	C	T	0.00334672	2988	ADD	2.51328	0.634957	10.1492	0.00144368	exonic	TMEM121B	.	nonsynonymous_SNV	TMEM121B:NM_031890:exon1:c.G1705A:p.V569I,TMEM121B:NM_001163079:exon2:c.G640A:p.V214I	0.0256	24.8
19	36230767	19:36230767:A:G	A	G	0.102832	2966	ADD	-1.24177	0.428131	10.1451	0.00144687	exonic	IGFLR1	.	nonsynonymous_SNV	IGFLR1:NM_024660:exon4:c.T565C:p.W189R	0.1836	0.119
9	3828409	9:3828409:C:G	C	G	0.000341763	2926	ADD	4.8036	1.43834	10.1411	0.00144997	splicing	GLIS3	NM_001042413:exon11:c.2657-1G>C\x3bNM_152629:exon10:c.2192-1G>C	.	.	0	35
17	1375218	17:1375218:G:A	G	A	0.00486088	2983	ADD	2.16748	0.561831	10.1407	0.00145027	exonic	MYO1C	.	synonymous_SNV	MYO1C:NM_001080779:exon19:c.C2004T:p.Y668Y,MYO1C:NM_001080950:exon19:c.C1947T:p.Y649Y,MYO1C:NM_001363855:exon19:c.C1932T:p.Y644Y,MYO1C:NM_033375:exon19:c.C1899T:p.Y633Y	0.0063	5.671
16	48576839	16:48576839:C:T	C	T	0.000334672	2988	ADD	4.82336	1.44971	10.1236	0.00146383	exonic	N4BP1	.	synonymous_SNV	N4BP1:NM_153029:exon7:c.G2667A:p.A889A	0.001	1.134
17	15554698	17:15554698:G:A	G	A	0.000334784	2987	ADD	5.14532	1.60633	10.1208	0.00146602	exonic	TRIM16	.	synonymous_SNV	TRIM16:NM_006470:exon4:c.C226T:p.L76L,TRIM16:NM_001348120:exon5:c.C226T:p.L76L,TRIM16:NM_001348119:exon7:c.C226T:p.L76L	0.0191	7.651
20	19951534	20:19951534:T:A	T	A	0.158573	2986	ADD	0.64665	0.187894	10.119	0.00146744	exonic	RIN2	.	nonsynonymous_SNV	RIN2:NM_018993:exon6:c.T589A:p.S197T,RIN2:NM_001242581:exon7:c.T736A:p.S246T	0.3089	15.41
5	149773043	5:149773043:G:A	G	A	0.000670466	2983	ADD	3.51368	1.07331	10.1175	0.00146866	exonic	TCOF1	.	nonsynonymous_SNV	TCOF1:NM_000356:exon22:c.G3478A:p.A1160T,TCOF1:NM_001135244:exon22:c.G3598A:p.A1200T,TCOF1:NM_001135245:exon22:c.G3481A:p.A1161T,TCOF1:NM_001195141:exon22:c.G3595A:p.A1199T,TCOF1:NM_001135243:exon23:c.G3709A:p.A1237T	0.006	0.199
19	4283059	19:4283059:G:A	G	A	0.00602611	2987	ADD	1.89535	0.517718	10.1066	0.00147737	exonic	SHD	.	nonsynonymous_SNV	SHD:NM_020209:exon3:c.G412A:p.G138S	0.1857	0.087
1	95286518	1:95286518:G:C	G	C	0.00117096	2989	ADD	3.72101	0.944859	10.1042	0.00147928	exonic	SLC44A3	.	nonsynonymous_SNV	SLC44A3:NM_001114106:exon2:c.G41C:p.G14A,SLC44A3:NM_001258340:exon2:c.G41C:p.G14A,SLC44A3:NM_001258341:exon2:c.G41C:p.G14A	0.0013	6.632
4	113545005	4:113545005:A:G	A	G	0.000335233	2983	ADD	4.80886	1.44808	10.0945	0.0014871	exonic	ZGRF1	.	nonsynonymous_SNV	ZGRF1:NM_001350397:exon4:c.T130C:p.C44R,ZGRF1:NM_018392:exon4:c.T130C:p.C44R	0.0015	20.2
6	12164457	6:12164457:G:A	G	A	0.000334672	2988	ADD	4.89598	1.48763	10.0933	0.00148809	exonic	HIVEP1	.	synonymous_SNV	HIVEP1:NM_002114:exon9:c.G7920A:p.S2640S	0.0003	0.4
19	11597938	19:11597938:T:C	T	C	0.000336927	2968	ADD	4.76187	1.42696	10.0922	0.00148898	exonic	ZNF653	.	nonsynonymous_SNV	ZNF653:NM_138783:exon5:c.A1207G:p.K403E	0.0004	20.2
19	57085829	19:57085829:G:T	G	T	0.000334672	2988	ADD	4.73956	1.41788	10.0899	0.00149084	exonic	ZNF470	.	nonsynonymous_SNV	ZNF470:NM_001001668:exon4:c.G127T:p.A43S	0.0005	22.6
17	56350258	17:56350258:C:T	C	T	0.000334672	2988	ADD	4.90346	1.49195	10.0849	0.00149493	exonic	MPO	.	nonsynonymous_SNV	MPO:NM_000250:exon10:c.G1643A:p.R548Q	0.0001	29
16	50746199	16:50746199:G:A	G	A	0.00167392	2987	ADD	3.17928	0.804658	10.079	0.00149968	exonic	NOD2	.	nonsynonymous_SNV	NOD2:NM_001293557:exon3:c.G2296A:p.V766M,NOD2:NM_001370466:exon4:c.G2296A:p.V766M,NOD2:NM_022162:exon4:c.G2377A:p.V793M	0.002	21.9
16	84270730	16:84270730:C:T	C	T	0.000837802	2984	ADD	3.5384	1.00301	10.0757	0.00150238	exonic	KCNG4	.	nonsynonymous_SNV	KCNG4:NM_172347:exon2:c.G362A:p.G121E	0.0004	20.7
2	18112419	2:18112419:T:C	T	C	0.000334672	2988	ADD	4.75096	1.42549	10.0726	0.00150487	exonic	KCNS3	.	synonymous_SNV	KCNS3:NM_001282428:exon3:c.T144C:p.H48H,KCNS3:NM_002252:exon3:c.T144C:p.H48H	0.0007	8.319
19	6383349	19:6383349:C:G	C	G	0.000334784	2987	ADD	4.82883	1.46009	10.0695	0.00150741	exonic	GTF2F1	.	nonsynonymous_SNV	GTF2F1:NM_002096:exon6:c.G655C:p.D219H	1.792e-05	23.7
1	52704379	1:52704379:C:T	C	T	0.000340368	2938	ADD	4.80375	1.44929	10.0646	0.00151147	exonic	ZFYVE9	.	synonymous_SNV	ZFYVE9:NM_004799:exon4:c.C1290T:p.D430D,ZFYVE9:NM_007324:exon4:c.C1290T:p.D430D	0.0012	5.617
5	37176061	5:37176061:C:T	C	T	0.00117332	2983	ADD	3.28619	0.859123	10.0612	0.00151426	exonic	CPLANE1	.	synonymous_SNV	CPLANE1:NM_023073:exon31:c.G5928A:p.G1976G	0.0133	1.646
4	57248742	4:57248742:A:C	A	C	0.00133824	2989	ADD	3.1486	0.805631	10.0604	0.00151492	exonic	AASDH	.	synonymous_SNV	AASDH:NM_001286671:exon3:c.T252G:p.A84A,AASDH:NM_001286672:exon3:c.T252G:p.A84A,AASDH:NM_001323890:exon3:c.T252G:p.A84A,AASDH:NM_001323892:exon3:c.T252G:p.A84A,AASDH:NM_181806:exon3:c.T252G:p.A84A	0.0018	8.299
19	44252028	19:44252028:T:C	T	C	0.000347584	2877	ADD	4.7688	1.43467	10.0534	0.00152065	exonic	SMG9	.	nonsynonymous_SNV	SMG9:NM_019108:exon4:c.A247G:p.T83A	9.087e-06	0.011
16	56686913	16:56686913:G:C	G	C	0.00100976	2971	ADD	3.30209	0.910244	10.0485	0.00152475	exonic	MT1B	.	nonsynonymous_SNV	MT1B:NM_005947:exon3:c.G122C:p.C41S	0.0107	19.44
1	247614508	1:247614508:C:T	C	T	0.000334672	2988	ADD	4.78524	1.44382	10.0483	0.0015249	exonic	OR2B11	.	synonymous_SNV	OR2B11:NM_001004492:exon1:c.G777A:p.A259A	0.0006	10.33
16	21123024	16:21123024:A:G	A	G	0.000334784	2987	ADD	4.23473	2.01473	10.0481	0.00152507	exonic	DNAH3	.	synonymous_SNV	DNAH3:NM_001347886:exon14:c.T1842C:p.D614D,DNAH3:NM_017539:exon14:c.T2022C:p.D674D	0.0271	5.39
20	44512278	20:44512278:C:G	C	G	0.00100368	2989	ADD	3.31704	0.91693	10.0475	0.00152556	exonic	ZSWIM1	.	synonymous_SNV	ZSWIM1:NM_080603:exon2:c.C1047G:p.V349V	0.0004	10.58
11	46780569	11:46780569:G:A	G	A	0.000334896	2986	ADD	4.79776	1.45047	10.0423	0.00152989	exonic	CKAP5	.	synonymous_SNV	CKAP5:NM_001008938:exon35:c.C4593T:p.F1531F,CKAP5:NM_014756:exon35:c.C4593T:p.F1531F	0.1211	9.299
16	55613118	16:55613118:T:G	T	G	0.00083724	2986	ADD	3.42397	1.00049	10.0386	0.00153296	exonic	LPCAT2	.	nonsynonymous_SNV	LPCAT2:NM_017839:exon13:c.T1412G:p.L471R	0.0017	29.1
12	58022000	12:58022000:T:C	T	C	0.000334672	2988	ADD	4.94848	1.52015	10.0381	0.00153331	exonic	B4GALNT1	.	nonsynonymous_SNV	B4GALNT1:NM_001276468:exon8:c.A883G:p.K295E,B4GALNT1:NM_001478:exon9:c.A1048G:p.K350E	0.0012	29.1
5	32126474	5:32126474:G:A	G	A	0.00435074	2988	ADD	2.12057	0.556494	10.0381	0.00153335	exonic	GOLPH3	.	synonymous_SNV	GOLPH3:NM_022130:exon4:c.C741T:p.D247D	0.0178	1.561
4	628493	4:628493:G:A	G	A	0.0140515	2989	ADD	1.46747	0.397647	10.0296	0.00154046	exonic	PDE6B	.	nonsynonymous_SNV	PDE6B:NM_000283:exon2:c.G496A:p.E166K,PDE6B:NM_001145291:exon2:c.G496A:p.E166K	0.0298	15.55
1	59787404	1:59787404:G:A	G	A	0.000334896	2986	ADD	4.79492	1.45136	10.0288	0.00154113	exonic	FGGY	.	synonymous_SNV	FGGY:NM_001113411:exon2:c.G183A:p.A61A,FGGY:NM_001244714:exon2:c.G183A:p.A61A,FGGY:NM_001350790:exon2:c.G183A:p.A61A,FGGY:NM_001350791:exon2:c.G183A:p.A61A,FGGY:NM_001350794:exon2:c.G183A:p.A61A,FGGY:NM_001350795:exon2:c.G183A:p.A61A,FGGY:NM_018291:exon2:c.G183A:p.A61A	0.0005	1.7
2	96799244	2:96799244:C:T	C	T	0.000335008	2985	ADD	4.86474	1.48343	10.0287	0.00154117	exonic	ASTL	.	synonymous_SNV	ASTL:NM_001002036:exon5:c.G375A:p.A125A	0.0007	7.196
17	49098651	17:49098651:T:C	T	C	0.000334672	2988	ADD	4.71474	1.41608	10.0279	0.00154184	exonic	SPAG9	.	nonsynonymous_SNV	SPAG9:NM_001251971:exon3:c.A388G:p.T130A,SPAG9:NM_001130527:exon6:c.A817G:p.T273A,SPAG9:NM_003971:exon6:c.A817G:p.T273A,SPAG9:NM_001130528:exon7:c.A859G:p.T287A	0.0003	9.61
4	113508551	4:113508551:G:A	G	A	0.000335008	2985	ADD	4.77038	1.44042	10.026	0.00154348	exonic	ZGRF1	.	nonsynonymous_SNV	ZGRF1:NM_001350397:exon11:c.C3488T:p.S1163L,ZGRF1:NM_018392:exon12:c.C3662T:p.S1221L	0.0003	11.02
1	89850899	1:89850899:C:T	C	T	0.000334784	2987	ADD	5.34835	1.73531	10.024	0.00154515	exonic	GBP6	.	synonymous_SNV	GBP6:NM_001320257:exon9:c.C1383T:p.P461P,GBP6:NM_198460:exon11:c.C1773T:p.P591P	0.0002	0.537
2	120413960	2:120413960:C:T	C	T	0.00167785	2980	ADD	2.7538	0.777407	10.0236	0.0015455	exonic	CFAP221	.	nonsynonymous_SNV	CFAP221:NM_001271049:exon24:c.C2437T:p.P813S	0.0012	15.36
2	73676504	2:73676504:G:A	G	A	0.000335121	2984	ADD	4.76321	1.43805	10.0216	0.00154714	exonic	ALMS1	.	synonymous_SNV	ALMS1:NM_015120:exon8:c.G2847A:p.V949V	8.123e-05	0.099
1	29438907	1:29438907:C:T	C	T	0.00033456	2989	ADD	4.72756	1.42328	10.0173	0.00155078	exonic	EPB41	.	nonsynonymous_SNV	EPB41:NM_203343:exon15:c.C2176T:p.R726C,EPB41:NM_001166007:exon16:c.C1654T:p.R552C,EPB41:NM_004437:exon17:c.C1615T:p.R539C,EPB41:NM_001166005:exon19:c.C2443T:p.R815C,EPB41:NM_203342:exon19:c.C1774T:p.R592C	0.001	32
2	1488595	2:1488595:T:C	T	C	0.000334896	2986	ADD	4.26319	2.01951	10.014	0.00155353	exonic	TPO	.	synonymous_SNV	TPO:NM_175722:exon7:c.T1047C:p.A349A,TPO:NM_175721:exon8:c.T1566C:p.A522A,TPO:NM_000547:exon9:c.T1566C:p.A522A,TPO:NM_001206744:exon9:c.T1566C:p.A522A,TPO:NM_001206745:exon9:c.T1566C:p.A522A,TPO:NM_175719:exon9:c.T1566C:p.A522A	0.0543	0.256
2	1488614	2:1488614:T:C	T	C	0.000334896	2986	ADD	4.26319	2.01951	10.014	0.00155353	exonic	TPO	.	synonymous_SNV	TPO:NM_175722:exon7:c.T1066C:p.L356L,TPO:NM_175721:exon8:c.T1585C:p.L529L,TPO:NM_000547:exon9:c.T1585C:p.L529L,TPO:NM_001206744:exon9:c.T1585C:p.L529L,TPO:NM_001206745:exon9:c.T1585C:p.L529L,TPO:NM_175719:exon9:c.T1585C:p.L529L	0.0545	0.364
2	1488616	2:1488616:A:C	A	C	0.000334896	2986	ADD	4.26319	2.01951	10.014	0.00155353	exonic	TPO	.	nonsynonymous_SNV	TPO:NM_175722:exon7:c.A1068C:p.L356F,TPO:NM_175721:exon8:c.A1587C:p.L529F,TPO:NM_000547:exon9:c.A1587C:p.L529F,TPO:NM_001206744:exon9:c.A1587C:p.L529F,TPO:NM_001206745:exon9:c.A1587C:p.L529F,TPO:NM_175719:exon9:c.A1587C:p.L529F	0.0546	16.88
19	51451971	19:51451971:G:A	G	A	0.000334672	2988	ADD	4.73456	1.42744	10.0104	0.00155665	exonic	KLK5	.	synonymous_SNV	KLK5:NM_001077492:exon5:c.C651T:p.C217C,KLK5:NM_012427:exon5:c.C651T:p.C217C,KLK5:NM_001077491:exon6:c.C651T:p.C217C	0.0006	4.545
11	65375904	11:65375904:G:T	G	T	0.00083696	2987	ADD	3.34892	0.970721	10.0051	0.00156106	exonic	MAP3K11	.	nonsynonymous_SNV	MAP3K11:NM_002419:exon2:c.C755A:p.P252H	0.0143	25.1
11	71906793	11:71906793:T:C	T	C	0.00318151	2986	ADD	2.47765	0.635496	10.0044	0.00156164	splicing	FOLR1	NM_016725:exon4:c.493+2T>C\x3bNM_016724:exon5:c.493+2T>C\x3bNM_000802:exon4:c.493+2T>C\x3bNM_016729:exon3:c.493+2T>C	.	.	0.0141	26.3
11	63884453	11:63884453:C:T	C	T	0.0663929	2922	ADD	0.886915	0.250809	10.004	0.001562	exonic	FLRT1	.	synonymous_SNV	FLRT1:NM_013280:exon2:c.C714T:p.R238R	0.5476	10.52
11	65381006	11:65381006:G:A	G	A	0.00083949	2978	ADD	3.34869	0.970736	10.0031	0.00156275	exonic	MAP3K11	.	synonymous_SNV	MAP3K11:NM_002419:exon1:c.C222T:p.D74D	0.0144	12.05
12	130648697	12:130648697:T:A	T	A	0.00033456	2989	ADD	4.70733	1.41721	9.99906	0.00156621	exonic	FZD10	.	nonsynonymous_SNV	FZD10:NM_007197:exon1:c.T1210A:p.C404S	0.0001	23.8
11	19077811	11:19077811:C:T	C	T	0.000334784	2987	ADD	4.7501	1.43597	9.99829	0.00156686	exonic	MRGPRX2	.	nonsynonymous_SNV	MRGPRX2:NM_054030:exon2:c.G139A:p.G47R,MRGPRX2:NM_001303615:exon3:c.G139A:p.G47R	5.373e-05	22.5
8	25346108	8:25346108:T:G	T	G	0.00471063	2972	ADD	2.44738	0.612849	9.99736	0.00156765	exonic	CDCA2	.	nonsynonymous_SNV	CDCA2:NM_001317906:exon12:c.T1529G:p.L510W,CDCA2:NM_001317907:exon13:c.T1574G:p.L525W,CDCA2:NM_152562:exon13:c.T1574G:p.L525W	0.0085	15.89
16	84256410	16:84256410:C:T	C	T	0.23086	2965	ADD	0.613492	0.182537	9.99401	0.00157051	exonic	KCNG4	.	nonsynonymous_SNV	KCNG4:NM_172347:exon3:c.G973A:p.G325R	0.2722	16.54
3	39180099	3:39180099:T:C	T	C	0.752764	2985	ADD	0.713661	0.228977	9.9902	0.00157377	exonic	TTC21A	.	synonymous_SNV	TTC21A:NM_001105513:exon27:c.T3726C:p.I1242I,TTC21A:NM_001366899:exon28:c.T3873C:p.I1291I,TTC21A:NM_001366900:exon28:c.T3849C:p.I1283I,TTC21A:NM_145755:exon28:c.T3870C:p.I1290I	0.7943	1.109
3	42739646	3:42739646:G:A	G	A	0.000335008	2985	ADD	4.75229	1.43867	9.98645	0.00157696	exonic	HHATL	.	synonymous_SNV	HHATL:NM_020707:exon6:c.C681T:p.R227R	0.0042	12.82
17	37872609	17:37872609:A:G	A	G	0.0026927	2971	ADD	2.47857	0.641468	9.9781	0.00158413	exonic	ERBB2	.	synonymous_SNV	ERBB2:NM_001289937:exon13:c.A1569G:p.P523P,ERBB2:NM_004448:exon13:c.A1569G:p.P523P,ERBB2:NM_001005862:exon16:c.A1479G:p.P493P,ERBB2:NM_001289938:exon16:c.A1479G:p.P493P,ERBB2:NM_001289936:exon17:c.A1524G:p.P508P	0.0106	6.75
23	70127631	X:70127631:A:G	A	G	0.000334896	2986	ADD	4.69897	1.41731	9.97298	0.00158855	exonic	TEX11	.	synonymous_SNV	TEX11:NM_031276:exon2:c.T9C:p.N3N	0.0004	NA
6	88136324	6:88136324:C:T	C	T	0.0175938	2984	ADD	1.45468	0.381774	9.97258	0.00158888	exonic	CFAP206	.	synonymous_SNV	CFAP206:NM_001031743:exon8:c.C921T:p.T307T	0.1199	5.844
10	101980355	10:101980355:A:G	A	G	0.00151515	2970	ADD	3.25134	0.850843	9.97151	0.00158983	exonic	CHUK	.	nonsynonymous_SNV	CHUK:NM_001278:exon5:c.T464C:p.V155A,CHUK:NM_001320928:exon5:c.T464C:p.V155A	0.0691	15.02
9	38068421	9:38068421:G:A	G	A	0.000358166	2792	ADD	4.71574	1.42271	9.97099	0.00159027	exonic	SHB	.	synonymous_SNV	SHB:NM_003028:exon1:c.C222T:p.S74S	0.0002	12.39
15	65235701	15:65235701:C:T	C	T	0.000334784	2987	ADD	4.99274	1.55318	9.97075	0.00159049	exonic	ANKDD1A	.	synonymous_SNV	ANKDD1A:NM_182703:exon11:c.C988T:p.L330L	0.0027	10.18
7	959623	7:959623:G:C	G	C	0.000527797	2842	ADD	4.64127	1.23967	9.96833	0.00159258	exonic	ADAP1	.	nonsynonymous_SNV	ADAP1:NM_001284311:exon2:c.C85G:p.Q29E,ADAP1:NM_001284310:exon3:c.C154G:p.Q52E,ADAP1:NM_001284308:exon4:c.C403G:p.Q135E,ADAP1:NM_001284309:exon4:c.C154G:p.Q52E,ADAP1:NM_006869:exon4:c.C370G:p.Q124E	0.0021	20.9
1	228433346	1:228433346:C:T	C	T	0.00217464	2989	ADD	2.75346	0.735615	9.96782	0.00159302	exonic	OBSCN	.	synonymous_SNV	OBSCN:NM_001098623:exon12:c.C3714T:p.C1238C,OBSCN:NM_052843:exon12:c.C3714T:p.C1238C,OBSCN:NM_001271223:exon13:c.C3990T:p.C1330C	0.216	0.761
10	128150096	10:128150096:G:T	G	T	0.00602208	2989	ADD	1.97635	0.534102	9.96519	0.00159529	exonic	C10orf90	.	nonsynonymous_SNV	C10orf90:NM_001004298:exon5:c.C1593A:p.D531E,C10orf90:NM_001350922:exon5:c.C1593A:p.D531E,C10orf90:NM_001350921:exon6:c.C1884A:p.D628E	0.2376	3.228
1	55549014	1:55549014:A:C	A	C	0.000504202	2975	ADD	4.56139	1.19382	9.96453	0.00159584	exonic	USP24	.	synonymous_SNV	USP24:NM_015306:exon58:c.T6906G:p.L2302L	0.0544	4.417
14	33684409	14:33684409:G:A	G	A	0.000335683	2979	ADD	5.2806	1.70949	9.96207	0.00159798	exonic	NPAS3	.	synonymous_SNV	NPAS3:NM_001165893:exon2:c.G72A:p.E24E,NPAS3:NM_022123:exon2:c.G72A:p.E24E,NPAS3:NM_173159:exon2:c.G72A:p.E24E,NPAS3:NM_001164749:exon3:c.G162A:p.E54E	0.0033	9.044
11	35684794	11:35684794:C:T	C	T	0.000336247	2974	ADD	4.69022	1.41521	9.96173	0.00159827	exonic	TRIM44	.	synonymous_SNV	TRIM44:NM_017583:exon1:c.C135T:p.A45A	0.0001	6.793
14	73978743	14:73978743:G:A	G	A	0.00050184	2989	ADD	4.61505	1.22133	9.95768	0.00160181	exonic	HEATR4	.	nonsynonymous_SNV	HEATR4:NM_203309:exon6:c.C1525T:p.R509W,HEATR4:NM_001220484:exon7:c.C1525T:p.R509W	0.0013	23.6
4	76788551	4:76788551:C:T	C	T	0.000335008	2985	ADD	4.91904	1.52081	9.95575	0.00160347	exonic	PPEF2	.	synonymous_SNV	PPEF2:NM_006239:exon14:c.G1671A:p.S557S	0.0036	8.115
17	11550431	17:11550431:A:G	A	G	0.00167392	2987	ADD	3.16	0.805778	9.95384	0.00160513	exonic	DNAH9	.	synonymous_SNV	DNAH9:NM_001372:exon12:c.A2013G:p.S671S	0.0019	1.254
2	20202929	2:20202929:C:T	C	T	0.221047	2979	ADD	-0.72716	0.237056	9.95126	0.00160739	exonic	MATN3	.	synonymous_SNV	MATN3:NM_002381:exon3:c.G909A:p.T303T	0.2518	1.536
17	39580518	17:39580518:G:A	G	A	0.000334672	2988	ADD	4.68656	1.41562	9.94908	0.00160931	exonic	KRT37	.	synonymous_SNV	KRT37:NM_003770:exon1:c.C258T:p.P86P	0.0006	0.173
2	242066789	2:242066789:A:G	A	G	0.00351995	2983	ADD	2.34167	0.625363	9.94059	0.00161674	exonic	PASK	.	nonsynonymous_SNV	PASK:NM_001252119:exon10:c.T1541C:p.L514S,PASK:NM_001252122:exon10:c.T1436C:p.L479S,PASK:NM_001252124:exon10:c.T1541C:p.L514S,PASK:NM_015148:exon10:c.T1541C:p.L514S,PASK:NM_001252120:exon11:c.T1541C:p.L514S	0.2435	0.043
4	3526743	4:3526743:G:T	G	T	0.00033456	2989	ADD	4.73291	1.43863	9.93032	0.00162577	exonic	LRPAP1	.	nonsynonymous_SNV	LRPAP1:NM_002337:exon2:c.C240A:p.H80Q	0.0003	12.7
3	122247579	3:122247579:C:T	C	T	0.000335458	2981	ADD	4.72322	1.43484	9.92697	0.00162873	exonic	PARP9	.	nonsynonymous_SNV	PARP9:NM_001146102:exon11:c.G2197A:p.G733R,PARP9:NM_001146103:exon11:c.G2092A:p.G698R,PARP9:NM_001146104:exon11:c.G2092A:p.G698R,PARP9:NM_001146105:exon11:c.G2092A:p.G698R,PARP9:NM_031458:exon11:c.G2197A:p.G733R	0.0003	27
1	208390654	1:208390654:C:T	C	T	0.000335008	2985	ADD	4.81519	1.47651	9.92678	0.00162892	exonic	PLXNA2	.	nonsynonymous_SNV	PLXNA2:NM_025179:exon2:c.G614A:p.R205Q	0.0008	23
11	10516515	11:10516515:C:T	C	T	0.000334784	2987	ADD	4.75533	1.4502	9.92016	0.00163478	exonic	AMPD3	.	nonsynonymous_SNV	AMPD3:NM_001172431:exon7:c.C727T:p.R243C,AMPD3:NM_000480:exon8:c.C1231T:p.R411C,AMPD3:NM_001025389:exon8:c.C1204T:p.R402C,AMPD3:NM_001025390:exon8:c.C1225T:p.R409C,AMPD3:NM_001172430:exon8:c.C1204T:p.R402C	0.0006	31
19	45381530	19:45381530:G:A	G	A	0.00363322	2890	ADD	2.47993	0.637284	9.9182	0.00163652	exonic	NECTIN2	.	nonsynonymous_SNV	NECTIN2:NM_002856:exon6:c.G1093A:p.V365M	0.0111	20.4
7	77756580	7:77756580:T:C	T	C	0.87885	2922	ADD	-0.666434	0.195882	9.91373	0.00164051	exonic	MAGI2	.	synonymous_SNV	MAGI2:NM_001301128:exon18:c.A3315G:p.L1105L,MAGI2:NM_012301:exon19:c.A3357G:p.L1119L	0.9111	10.01
17	74469779	17:74469779:T:C	T	C	0.0248156	2982	ADD	1.22308	0.341243	9.91371	0.00164051	exonic	RHBDF2	.	nonsynonymous_SNV	RHBDF2:NM_001005498:exon14:c.A1684G:p.M562V,RHBDF2:NM_024599:exon15:c.A1771G:p.M591V	0.0305	18.02
11	124564245	11:124564245:A:G	A	G	0.00033456	2989	ADD	4.72621	1.43813	9.91294	0.00164119	exonic	SPA17	.	nonsynonymous_SNV	SPA17:NM_017425:exon5:c.A359G:p.K120R	0.0133	24
19	4290617	19:4290617:C:T	C	T	0.000334784	2987	ADD	4.84194	1.49248	9.90402	0.00164919	exonic	SHD	.	nonsynonymous_SNV	SHD:NM_020209:exon6:c.C1010T:p.T337M	0.0003	9.625
1	173702857	1:173702857:C:T	C	T	0.000335796	2978	ADD	4.67737	1.41933	9.89644	0.001656	exonic	KLHL20	.	nonsynonymous_SNV	KLHL20:NM_014458:exon3:c.C29T:p.T10I	0.0189	23.4
1	47280785	1:47280785:G:A	G	A	0.00083696	2987	ADD	2.96509	0.986517	9.89613	0.00165627	exonic	CYP4B1	.	nonsynonymous_SNV	CYP4B1:NM_001319162:exon6:c.G433A:p.A145T,CYP4B1:NM_001319163:exon6:c.G430A:p.A144T,CYP4B1:NM_001319161:exon7:c.G877A:p.A293T,CYP4B1:NM_000779:exon8:c.G919A:p.A307T,CYP4B1:NM_001099772:exon8:c.G922A:p.A308T	0.0389	24.1
16	66426128	16:66426128:G:A	G	A	0.000502176	2987	ADD	4.56811	1.21203	9.89019	0.00166161	exonic	CDH5	.	synonymous_SNV	CDH5:NM_001795:exon7:c.G1059A:p.A353A	0.0009	3.135
15	42740560	15:42740560:T:C	T	C	0.00200803	2988	ADD	3.06534	0.754697	9.88459	0.00166667	exonic	ZNF106	.	nonsynonymous_SNV	ZNF106:NM_001284306:exon2:c.A331G:p.R111G,ZNF106:NM_022473:exon3:c.A2776G:p.R926G,ZNF106:NM_001284307:exon4:c.A460G:p.R154G,ZNF106:NM_001366844:exon4:c.A460G:p.R154G,ZNF106:NM_001366845:exon6:c.A2845G:p.R949G,ZNF106:NM_001366846:exon6:c.A2845G:p.R949G	0.0041	22.9
17	10348004	17:10348004:G:T	G	T	0.000334784	2987	ADD	4.90432	1.52606	9.8805	0.0016704	exonic	MYH4	.	nonsynonymous_SNV	MYH4:NM_017533:exon39:c.C5584A:p.R1862S	0.0071	24.1
17	11845794	17:11845794:G:A	G	A	0.000335345	2982	ADD	4.90415	1.52606	9.87948	0.00167132	exonic	DNAH9	.	nonsynonymous_SNV	DNAH9:NM_004662:exon13:c.G1771A:p.G591S,DNAH9:NM_001372:exon67:c.G12835A:p.G4279S	0.0052	25.5
11	2992747	11:2992747:G:A	G	A	0.000336247	2974	ADD	4.70716	1.43581	9.87072	0.00167931	exonic	NAP1L4	.	synonymous_SNV	NAP1L4:NM_001369378:exon6:c.C333T:p.T111T,NAP1L4:NM_001369379:exon6:c.C333T:p.T111T,NAP1L4:NM_001369380:exon6:c.C333T:p.T111T,NAP1L4:NM_001369384:exon6:c.C333T:p.T111T,NAP1L4:NM_005969:exon6:c.C333T:p.T111T,NAP1L4:NM_001369376:exon7:c.C333T:p.T111T,NAP1L4:NM_001369381:exon7:c.C333T:p.T111T,NAP1L4:NM_001369382:exon7:c.C333T:p.T111T,NAP1L4:NM_001369383:exon7:c.C333T:p.T111T,NAP1L4:NM_001369385:exon…	0.0845	5.884
7	21779278	7:21779278:A:G	A	G	0.650837	2927	ADD	-0.534841	0.162508	9.86704	0.00168267	exonic	DNAH11	.	nonsynonymous_SNV	DNAH11:NM_001277115:exon48:c.A7901G:p.N2634S	0.6442	14.48
10	76797754	10:76797754:A:G	A	G	0.000334784	2987	ADD	4.736	1.4498	9.86562	0.00168395	exonic	DUPD1	.	nonsynonymous_SNV	DUPD1:NM_001003892:exon3:c.T503C:p.M168T	0.0012	25.7
9	135277099	9:135277099:C:T	C	T	0.000334672	2988	ADD	4.66518	1.41932	9.8604	0.00168873	exonic	TTF1	.	synonymous_SNV	TTF1:NM_007344:exon2:c.G1110A:p.V370V	0.0285	0.177
5	154336741	5:154336741:A:G	A	G	0.000338639	2953	ADD	4.71661	1.44169	9.85949	0.00168958	exonic	MRPL22	.	nonsynonymous_SNV	MRPL22:NM_001014990:exon4:c.A68G:p.N23S,MRPL22:NM_014180:exon5:c.A308G:p.N103S	0.0005	14.67
2	170377377	2:170377377:T:C	T	C	0.000502513	2985	ADD	4.76443	1.34587	9.85034	0.00169801	exonic	KLHL41	.	synonymous_SNV	KLHL41:NM_006063:exon5:c.T1569C:p.D523D	0.0033	9.172
17	80367243	17:80367243:C:T	C	T	0.00066912	2989	ADD	3.94972	1.1819	9.84943	0.00169883	splicing	OGFOD3	NM_024648:exon4:c.423+1G>A\x3bNM_175902:exon4:c.423+1G>A	.	.	0.0166	34
2	189901388	2:189901388:T:C	T	C	0.000505221	2969	ADD	3.72812	1.27072	9.84382	0.00170404	exonic	COL5A2	.	nonsynonymous_SNV	COL5A2:NM_000393:exon52:c.A4067G:p.D1356G	0.0008	22.8
1	152857167	1:152857167:A:G	A	G	0.00033456	2989	ADD	4.65417	1.4173	9.84147	0.0017062	exonic	SMCP	.	nonsynonymous_SNV	SMCP:NM_030663:exon2:c.A269G:p.N90S	0.0006	0.007
3	36872707	3:36872707:C:T	C	T	0.000335345	2982	ADD	4.68675	1.43204	9.83787	0.00170954	exonic	TRANK1	.	synonymous_SNV	TRANK1:NM_014831:exon21:c.G8235A:p.A2745A,TRANK1:NM_001329998:exon22:c.G8367A:p.A2789A	0.0023	1.371
4	2065658	4:2065658:T:C	T	C	0.000342583	2919	ADD	4.67253	1.42539	9.83613	0.00171116	exonic	NAT8L	.	nonsynonymous_SNV	NAT8L:NM_178557:exon3:c.T713C:p.V238A	0.0004	18.34
12	54757228	12:54757228:C:T	C	T	0.000334672	2988	ADD	4.86688	1.51513	9.83393	0.00171321	exonic	GPR84	.	synonymous_SNV	GPR84:NM_020370:exon2:c.G408A:p.G136G	0.0003	5.298
11	102584528	11:102584528:A:G	A	G	0.000505732	2966	ADD	4.59177	1.22936	9.83012	0.00171676	exonic	MMP8	.	synonymous_SNV	MMP8:NM_002424:exon9:c.T1251C:p.F417F,MMP8:NM_001304441:exon10:c.T1182C:p.F394F,MMP8:NM_001304442:exon10:c.T1182C:p.F394F	0.002	7.81
6	128134415	6:128134415:G:A	G	A	0.000503694	2978	ADD	4.572	1.22188	9.82643	0.0017202	exonic	THEMIS	.	synonymous_SNV	THEMIS:NM_001010923:exon4:c.C1371T:p.F457F,THEMIS:NM_001164685:exon4:c.C1371T:p.F457F,THEMIS:NM_001164687:exon4:c.C1266T:p.F422F,THEMIS:NM_001318531:exon5:c.C1080T:p.F360F	0.0002	11.64
13	76382163	13:76382163:C:T	C	T	0.000335008	2985	ADD	4.79168	1.4816	9.82416	0.00172234	exonic	LMO7	.	nonsynonymous_SNV	LMO7:NM_001366634:exon7:c.C763T:p.R255W,LMO7:NM_001366636:exon7:c.C763T:p.R255W,LMO7:NM_015842:exon7:c.C1045T:p.R349W,LMO7:NM_001330583:exon8:c.C1045T:p.R349W,LMO7:NM_001366632:exon8:c.C1045T:p.R349W,LMO7:NM_001366633:exon8:c.C1618T:p.R540W,LMO7:NM_001306080:exon10:c.C1744T:p.R582W	0.0003	23.3
19	19753345	19:19753345:C:T	C	T	0.00117214	2986	ADD	3.25814	0.893216	9.82082	0.00172548	exonic	GMIP	.	nonsynonymous_SNV	GMIP:NM_001288998:exon2:c.G103A:p.V35M,GMIP:NM_001288999:exon2:c.G103A:p.V35M,GMIP:NM_016573:exon2:c.G103A:p.V35M	0.0048	23.7
16	5040776	16:5040776:T:C	T	C	0.000334784	2987	ADD	5.00141	1.5858	9.81468	0.00173125	exonic	SEC14L5	.	synonymous_SNV	SEC14L5:NM_014692:exon5:c.T354C:p.P118P	0.0012	6.558
2	48602186	2:48602186:A:G	A	G	0.0804886	2988	ADD	-1.36702	0.490105	9.80987	0.00173576	exonic	FOXN2	.	synonymous_SNV	FOXN2:NM_002158:exon7:c.A900G:p.E300E	0.1192	10.97
2	242430994	2:242430994:C:T	C	T	0.00301811	2982	ADD	2.34926	0.643377	9.80492	0.00174044	exonic	FARP2	.	nonsynonymous_SNV	FARP2:NM_014808:exon24:c.C2687T:p.S896F	0.3385	16.21
9	2110399	9:2110399:C:T	C	T	0.0015121	2976	ADD	3.07502	0.888945	9.79946	0.00174562	exonic	SMARCA2	.	synonymous_SNV	SMARCA2:NM_001289396:exon24:c.C3438T:p.S1146S,SMARCA2:NM_001289397:exon24:c.C3264T:p.S1088S,SMARCA2:NM_003070:exon24:c.C3438T:p.S1146S,SMARCA2:NM_139045:exon24:c.C3438T:p.S1146S	0.0147	12.51
7	128415785	7:128415785:C:T	C	T	0.00150552	2989	ADD	3.12936	0.812952	9.7993	0.00174578	exonic	OPN1SW	.	synonymous_SNV	OPN1SW:NM_001708:exon1:c.G60A:p.P20P	0.0017	9.601
23	114425876	X:114425876:C:T	C	T	0.000503356	2980	ADD	2.58745	1.00737	9.79929	0.00174578	exonic	RBMXL3	.	synonymous_SNV	RBMXL3:NM_001145346:exon1:c.C1872T:p.Y624Y	0.0003	NA
12	6167022	12:6167022:C:T	C	T	0.000336022	2976	ADD	5.03722	1.60669	9.7986	0.00174647	exonic	VWF	.	synonymous_SNV	VWF:NM_000552:exon14:c.G1722A:p.P574P	1.855e-05	10.69
14	45398366	14:45398366:G:A	G	A	0.000671141	2980	ADD	4.26638	1.28183	9.79409	0.00175073	exonic	KLHL28	.	synonymous_SNV	KLHL28:NM_001308112:exon5:c.C1623T:p.Y541Y,KLHL28:NM_017658:exon5:c.C1581T:p.Y527Y	0.001	9.737
2	202072897	2:202072897:A:G	A	G	0.000335458	2981	ADD	4.65523	1.42533	9.79066	0.001754	exonic	CASP10	.	nonsynonymous_SNV	CASP10:NM_001206542:exon6:c.A784G:p.K262E,CASP10:NM_001230:exon6:c.A784G:p.K262E,CASP10:NM_032974:exon8:c.A913G:p.K305E,CASP10:NM_032977:exon8:c.A913G:p.K305E	0.0006	20.4
1	161275682	1:161275682:C:A	C	A	0.00033456	2989	ADD	4.64879	1.42263	9.7894	0.00175521	exonic	MPZ	.	nonsynonymous_SNV	MPZ:NM_000530:exon6:c.G731T:p.R244L	0.0001	31
10	96484233	10:96484233:C:T	C	T	0.00117253	2985	ADD	3.48479	0.971468	9.78859	0.00175598	exonic	CYP2C18	.	synonymous_SNV	CYP2C18:NM_001128925:exon6:c.C915T:p.T305T,CYP2C18:NM_000772:exon7:c.C1092T:p.T364T	0.0744	0.714
16	72144908	16:72144908:G:A	G	A	0.000335683	2979	ADD	4.75361	1.46933	9.78761	0.00175691	exonic	DHX38	.	synonymous_SNV	DHX38:NM_014003:exon26:c.G3531A:p.A1177A	0.0003	7.661
3	130435331	3:130435331:A:G	A	G	0.00033557	2980	ADD	4.69569	1.44458	9.78132	0.00176295	exonic	PIK3R4	.	nonsynonymous_SNV	PIK3R4:NM_014602:exon9:c.T2240C:p.M747T	6.535e-05	21.1
1	200968484	1:200968484:C:T	C	T	0.00033456	2989	ADD	4.67684	1.43668	9.77825	0.00176588	exonic	KIF21B	.	synonymous_SNV	KIF21B:NM_001252100:exon13:c.G1878A:p.E626E,KIF21B:NM_001252102:exon13:c.G1878A:p.E626E,KIF21B:NM_001252103:exon13:c.G1878A:p.E626E,KIF21B:NM_017596:exon13:c.G1878A:p.E626E	0.0001	9.863
13	21742462	13:21742462:A:G	A	G	0.00033456	2989	ADD	4.83658	1.51071	9.77432	0.00176966	exonic	SKA3	.	synonymous_SNV	SKA3:NM_001166017:exon4:c.T408C:p.D136D,SKA3:NM_145061:exon4:c.T408C:p.D136D	0.0011	0.544
6	32149140	6:32149140:C:T	C	T	0.00134544	2973	ADD	3.22619	0.872987	9.7731	0.00177084	exonic	AGER	.	nonsynonymous_SNV	AGER:NM_001136:exon10:c.G1106A:p.R369Q,AGER:NM_001206929:exon10:c.G1154A:p.R385Q,AGER:NM_001206932:exon10:c.G1064A:p.R355Q	0.024	0.022
6	152787181	6:152787181:T:G	T	G	0.000337041	2967	ADD	4.72759	1.46081	9.76916	0.00177464	exonic	SYNE1	.	nonsynonymous_SNV	SYNE1:NM_033071:exon17:c.A1686C:p.Q562H,SYNE1:NM_182961:exon17:c.A1665C:p.Q555H	9.881e-05	18.31
4	104007643	4:104007643:C:T	C	T	0.000336587	2971	ADD	4.65736	1.42991	9.76559	0.00177807	exonic	BDH2	.	nonsynonymous_SNV	BDH2:NM_020139:exon6:c.G412A:p.V138I	0.0106	9.579
1	203134434	1:203134434:C:T	C	T	0.000334784	2987	ADD	4.66166	1.43238	9.76266	0.0017809	exonic	ADORA1	.	synonymous_SNV	ADORA1:NM_001048230:exon3:c.C387T:p.A129A,ADORA1:NM_001365065:exon3:c.C183T:p.A61A,ADORA1:NM_001365066:exon3:c.C39T:p.A13A,ADORA1:NM_000674:exon4:c.C387T:p.A129A	0.0002	6.923
1	161183191	1:161183191:C:G	C	G	0.00133824	2989	ADD	3.15319	0.843076	9.76084	0.00178267	exonic	NDUFS2	.	nonsynonymous_SNV	NDUFS2:NM_001166159:exon11:c.C1138G:p.H380D,NDUFS2:NM_004550:exon12:c.C1138G:p.H380D	0.0012	29.4
19	9324590	19:9324590:G:A	G	A	0.000837802	2984	ADD	3.30528	0.967071	9.76081	0.00178271	exonic	OR7D4	.	synonymous_SNV	OR7D4:NM_001005191:exon1:c.C924T:p.A308A	0.0533	0.256
13	95847145	13:95847145:G:A	G	A	0.000334784	2987	ADD	4.63144	1.4194	9.76072	0.00178279	exonic	ABCC4	.	nonsynonymous_SNV	ABCC4:NM_001301830:exon8:c.C983T:p.P328L,ABCC4:NM_001105515:exon9:c.C1208T:p.P403L,ABCC4:NM_001301829:exon9:c.C1208T:p.P403L,ABCC4:NM_005845:exon9:c.C1208T:p.P403L	0.0038	9.725
11	65745101	11:65745101:C:T	C	T	0.000334784	2987	ADD	4.80244	1.49697	9.7595	0.00178398	exonic	SART1	.	synonymous_SNV	SART1:NM_005146:exon16:c.C2013T:p.A671A	0.0002	6.59
1	92642595	1:92642595:A:G	A	G	0.000337496	2963	ADD	4.70103	1.45057	9.75845	0.00178501	exonic	KIAA1107	.	nonsynonymous_SNV	KIAA1107:NM_015237:exon3:c.A306G:p.I102M	0.0024	8.308
1	92200448	1:92200448:C:T	C	T	0.000334784	2987	ADD	4.70066	1.45056	9.75637	0.00178702	exonic	TGFBR3	.	synonymous_SNV	TGFBR3:NM_001195683:exon5:c.G453A:p.R151R,TGFBR3:NM_003243:exon5:c.G453A:p.R151R,TGFBR3:NM_001195684:exon6:c.G453A:p.R151R	0.0036	12.05
18	22020467	18:22020467:T:A	T	A	0.162908	2971	ADD	-0.911714	0.305408	9.75504	0.0017883	exonic	IMPACT	.	nonsynonymous_SNV	IMPACT:NM_018439:exon6:c.T375A:p.D125E	0.1753	0.021
9	19082930	9:19082930:T:G	T	G	0.000334896	2986	ADD	4.65037	1.42874	9.75436	0.001789	exonic	HAUS6	.	nonsynonymous_SNV	HAUS6:NM_001270890:exon8:c.A811C:p.N271H,HAUS6:NM_017645:exon8:c.A811C:p.N271H	0.0001	1.597
17	38926214	17:38926214:C:G	C	G	0.000334672	2988	ADD	4.62064	1.41588	9.75395	0.00178937	exonic	KRT26	.	nonsynonymous_SNV	KRT26:NM_181539:exon4:c.G842C:p.R281T	0.0001	17.86
2	242066156	2:242066156:C:T	C	T	0.00368633	2984	ADD	2.30304	0.619244	9.75087	0.00179238	exonic	PASK	.	nonsynonymous_SNV	PASK:NM_001252119:exon10:c.G2174A:p.G725D,PASK:NM_001252122:exon10:c.G2069A:p.G690D,PASK:NM_001252124:exon10:c.G2174A:p.G725D,PASK:NM_015148:exon10:c.G2174A:p.G725D,PASK:NM_001252120:exon11:c.G2174A:p.G725D	0.2432	0.016
1	109813891	1:109813891:G:A	G	A	0.00468384	2989	ADD	2.29201	0.562248	9.75051	0.00179275	exonic	CELSR2	.	nonsynonymous_SNV	CELSR2:NM_001408:exon26:c.G7649A:p.R2550Q	0.0049	21.2
1	152275810	1:152275810:G:A	G	A	0.00033456	2989	ADD	4.69705	1.45008	9.74742	0.00179577	exonic	FLG	.	nonsynonymous_SNV	FLG:NM_002016:exon3:c.C11552T:p.A3851V	0.0004	5.352
17	56649302	17:56649302:G:A	G	A	0.000503525	2979	ADD	4.66945	1.28592	9.74739	0.00179577	exonic	TEX14	.	nonsynonymous_SNV	TEX14:NM_031272:exon24:c.C3697T:p.P1233S,TEX14:NM_001201457:exon25:c.C3835T:p.P1279S,TEX14:NM_198393:exon25:c.C3817T:p.P1273S	0.0007	9.419
19	50910307	19:50910307:G:A	G	A	0.000335345	2982	ADD	4.66394	1.43769	9.73443	0.00180846	exonic	POLD1	.	nonsynonymous_SNV	POLD1:NM_001308632:exon12:c.G1562A:p.R521Q,POLD1:NM_001256849:exon13:c.G1562A:p.R521Q,POLD1:NM_002691:exon13:c.G1562A:p.R521Q	0.0004	24.4
5	5186252	5:5186252:C:A	C	A	0.00150653	2987	ADD	3.12161	0.820834	9.73419	0.00180871	exonic	ADAMTS16	.	nonsynonymous_SNV	ADAMTS16:NM_139056:exon5:c.C851A:p.S284Y	0.0135	21.6
11	65385508	11:65385508:G:A	G	A	0.000335233	2983	ADD	4.80461	1.50196	9.73359	0.0018093	exonic	PCNX3	.	synonymous_SNV	PCNX3:NM_032223:exon6:c.G675A:p.A225A	0.0426	8.365
20	5283376	20:5283376:G:A	G	A	0.3773	2881	ADD	-0.592125	0.187672	9.73005	0.0018128	exonic	PROKR2	.	synonymous_SNV	PROKR2:NM_144773:exon3:c.C465T:p.L155L	0.5483	0.075
19	10221642	19:10221642:A:G	A	G	0.000859402	2909	ADD	3.3354	1.00437	9.72959	0.00181326	exonic	PPAN\x3bPPAN-P2RY11	.	nonsynonymous_SNV	PPAN:NM_001346141:exon11:c.A1064G:p.Q355R,PPAN-P2RY11:NM_001040664:exon12:c.A1223G:p.Q408R,PPAN-P2RY11:NM_001198690:exon12:c.A1223G:p.Q408R,PPAN:NM_001346139:exon12:c.A1220G:p.Q407R,PPAN:NM_020230:exon12:c.A1223G:p.Q408R	0.1563	0.338
1	16245979	1:16245979:A:T	A	T	0.00033456	2989	ADD	4.72003	1.46403	9.7274	0.00181539	exonic	SPEN	.	synonymous_SNV	SPEN:NM_015001:exon8:c.A1602T:p.T534T	0.0101	9.592
1	245530177	1:245530177:C:T	C	T	0.00434928	2989	ADD	1.87186	0.53765	9.72728	0.00181552	exonic	KIF26B	.	synonymous_SNV	KIF26B:NM_018012:exon3:c.C507T:p.V169V	0.0629	10.26
11	66620053	11:66620053:G:A	G	A	0.000335683	2979	ADD	4.6109	1.41597	9.72312	0.00181966	exonic	PC	.	nonsynonymous_SNV	PC:NM_022172:exon13:c.C1682T:p.P561L,PC:NM_000920:exon14:c.C1682T:p.P561L,PC:NM_001040716:exon15:c.C1682T:p.P561L	6.675e-05	9.152
17	73567113	17:73567113:G:A	G	A	0.000335008	2985	ADD	4.65805	1.43722	9.71882	0.0018239	exonic	LLGL2	.	nonsynonymous_SNV	LLGL2:NM_001031803:exon17:c.G2108A:p.R703H,LLGL2:NM_004524:exon17:c.G2108A:p.R703H	3.249e-05	32
23	41031102	X:41031102:G:C	G	C	0.00050184	2989	ADD	4.61228	1.32833	9.71241	0.00183029	exonic	USP9X	.	synonymous_SNV	USP9X:NM_001039590:exon21:c.G3039C:p.L1013L,USP9X:NM_001039591:exon21:c.G3039C:p.L1013L	0.0087	NA
1	55119802	1:55119802:C:T	C	T	0.00117135	2988	ADD	2.56968	0.838606	9.70935	0.00183333	exonic	MROH7	.	synonymous_SNV	MROH7:NM_001039464:exon3:c.C1203T:p.D401D	0.043	0.198
5	140166534	5:140166534:C:A	C	A	0.000334896	2986	ADD	4.80014	1.50475	9.70346	0.0018392	exonic	PCDHA1	.	nonsynonymous_SNV	PCDHA1:NM_018900:exon1:c.C659A:p.P220Q,PCDHA1:NM_031410:exon1:c.C659A:p.P220Q,PCDHA1:NM_031411:exon1:c.C659A:p.P220Q	0.0024	24.8
5	149997971	5:149997971:C:T	C	T	0.00100402	2988	ADD	3.33818	0.958365	9.70294	0.00183971	exonic	SYNPO	.	synonymous_SNV	SYNPO:NM_001166208:exon2:c.C42T:p.S14S,SYNPO:NM_001166209:exon2:c.C42T:p.S14S	0.0046	3.421
10	123970513	10:123970513:G:A	G	A	0.000676361	2957	ADD	3.59038	1.09423	9.69495	0.00184774	exonic	TACC2	.	synonymous_SNV	TACC2:NM_001291878:exon3:c.G807A:p.T269T,TACC2:NM_006997:exon3:c.G807A:p.T269T,TACC2:NM_206860:exon3:c.G807A:p.T269T,TACC2:NM_206861:exon6:c.G1011A:p.T337T,TACC2:NM_001291876:exon8:c.G6438A:p.T2146T,TACC2:NM_001291877:exon8:c.G6585A:p.T2195T,TACC2:NM_206862:exon9:c.G6573A:p.T2191T	0.2161	0.044
15	45464170	15:45464170:G:A	G	A	0.00535655	2987	ADD	2.06935	0.550446	9.69433	0.00184837	exonic	SHF	.	nonsynonymous_SNV	SHF:NM_001301169:exon5:c.C1048T:p.R350C	0.0061	10.12
6	158517024	6:158517024:C:T	C	T	0.000334896	2986	ADD	4.63121	1.43042	9.6856	0.00185716	exonic	SYNJ2	.	synonymous_SNV	SYNJ2:NM_001178088:exon26:c.C3408T:p.A1136A,SYNJ2:NM_003898:exon27:c.C4119T:p.A1373A	0.0006	0.036
4	115544175	4:115544175:G:A	G	A	0.000334784	2987	ADD	4.59513	1.41524	9.68179	0.00186102	exonic	UGT8	.	nonsynonymous_SNV	UGT8:NM_003360:exon1:c.G139A:p.E47K,UGT8:NM_001128174:exon2:c.G139A:p.E47K,UGT8:NM_001322113:exon2:c.G139A:p.E47K,UGT8:NM_001322114:exon2:c.G139A:p.E47K,UGT8:NM_001322112:exon3:c.G139A:p.E47K	0.0003	22.5
1	6711639	1:6711639:T:G	T	G	0.00033456	2989	ADD	4.25619	2.05124	9.67739	0.00186548	exonic	DNAJC11	.	synonymous_SNV	DNAJC11:NM_018198:exon7:c.A654C:p.L218L	0.0364	3.627
9	104187775	9:104187775:G:A	G	A	0.00184193	2986	ADD	3.09498	0.801383	9.66677	0.00187629	exonic	ALDOB	.	synonymous_SNV	ALDOB:NM_000035:exon7:c.C759T:p.T253T	0.0364	5.096
15	64968247	15:64968247:G:T	G	T	0.000502681	2984	ADD	4.71477	1.30973	9.6574	0.00188591	exonic	ZNF609	.	nonsynonymous_SNV	ZNF609:NM_015042:exon4:c.G3194T:p.G1065V	6.269e-05	22.3
14	105685564	14:105685564:G:A	G	A	0.000334672	2988	ADD	4.61447	1.42782	9.6545	0.00188886	exonic	BRF1	.	synonymous_SNV	BRF1:NM_001242789:exon8:c.C669T:p.I223I,BRF1:NM_145685:exon9:c.C771T:p.I257I,BRF1:NM_001242788:exon12:c.C1302T:p.I434I,BRF1:NM_001242786:exon13:c.C1104T:p.I368I,BRF1:NM_001242787:exon13:c.C1038T:p.I346I,BRF1:NM_001519:exon13:c.C1383T:p.I461I	0.0005	10.95
16	3454491	16:3454491:G:A	G	A	0.000334672	2988	ADD	4.65714	1.44754	9.6492	0.00189435	exonic	ZNF174	.	synonymous_SNV	ZNF174:NM_001032292:exon2:c.G468A:p.Q156Q,ZNF174:NM_001347869:exon2:c.G468A:p.Q156Q,ZNF174:NM_003450:exon2:c.G468A:p.Q156Q,ZNF174:NM_001347868:exon3:c.G468A:p.Q156Q,ZNF174:NM_001347870:exon3:c.G468A:p.Q156Q	0.0001	9.964
13	20987512	13:20987512:A:C	A	C	0.00033456	2989	ADD	4.65425	1.44668	9.64623	0.0018974	exonic	CRYL1	.	synonymous_SNV	CRYL1:NM_001363647:exon5:c.T486G:p.S162S,CRYL1:NM_015974:exon6:c.T648G:p.S216S	0.0002	6.36
1	65016312	1:65016312:C:T	C	T	0.00150653	2987	ADD	3.12041	0.841151	9.6445	0.0018992	exonic	CACHD1	.	synonymous_SNV	CACHD1:NM_020925:exon2:c.C234T:p.I78I	0.0013	11.66
1	9165607	1:9165607:G:A	G	A	0.000334672	2988	ADD	4.67754	1.45732	9.64368	0.00190003	exonic	GPR157	.	nonsynonymous_SNV	GPR157:NM_024980:exon3:c.C730T:p.R244W	6.689e-05	32
18	72515945	18:72515945:G:A	G	A	0.000336247	2974	ADD	4.64238	1.44239	9.63938	0.0019045	exonic	ZNF407	.	nonsynonymous_SNV	ZNF407:NM_001146190:exon4:c.G4903A:p.G1635R	0.008	3.697
17	7662800	17:7662800:C:T	C	T	0.000334784	2987	ADD	4.67132	1.4554	9.63932	0.00190454	exonic	DNAH2	.	nonsynonymous_SNV	DNAH2:NM_020877:exon16:c.C2509T:p.R837C	0.0006	26.9
3	48473932	3:48473932:C:T	C	T	0.000335008	2985	ADD	4.9823	1.60621	9.63888	0.00190502	exonic	CCDC51	.	synonymous_SNV	CCDC51:NM_001256964:exon4:c.G1122A:p.T374T,CCDC51:NM_001256965:exon4:c.G795A:p.T265T,CCDC51:NM_001256966:exon4:c.G795A:p.T265T,CCDC51:NM_001256967:exon4:c.G795A:p.T265T,CCDC51:NM_001256968:exon4:c.G795A:p.T265T,CCDC51:NM_001256969:exon4:c.G795A:p.T265T,CCDC51:NM_024661:exon4:c.G1122A:p.T374T	0.0012	1.081
11	27520274	11:27520274:T:G	T	G	0.00502176	2987	ADD	2.07522	0.555649	9.63861	0.00190529	exonic	LIN7C	.	synonymous_SNV	LIN7C:NM_018362:exon5:c.A516C:p.R172R	0.0048	6.934
1	62380287	1:62380287:A:G	A	G	0.00033456	2989	ADD	4.64025	1.44229	9.63495	0.00190911	exonic	PATJ	.	nonsynonymous_SNV	PATJ:NM_001350145:exon26:c.A3521G:p.N1174S,PATJ:NM_176877:exon26:c.A3521G:p.N1174S	0.0705	0.001
11	73020853	11:73020853:C:A	C	A	0.000335909	2977	ADD	4.64041	1.44375	9.62476	0.00191973	exonic	ARHGEF17	.	nonsynonymous_SNV	ARHGEF17:NM_014786:exon1:c.C1170A:p.S390R	0.0008	22.4
20	17640966	20:17640966:CCTT:C	CCTT	C	0.00016728	2989	ADD	5.0306	2.31184	9.61943	0.00192531	exonic	RRBP1	.	nonframeshift_deletion	RRBP1:NM_004587:exon2:c.184_186del:p.K62del,RRBP1:NM_001042576:exon3:c.184_186del:p.K62del,RRBP1:NM_001365613:exon3:c.184_186del:p.K62del	6.669e-05	19.75
16	10775872	16:10775872:C:T	C	T	0.000167392	2987	ADD	5.03115	2.31221	9.61903	0.00192571	exonic	TEKT5	.	nonsynonymous_SNV	TEKT5:NM_144674:exon4:c.G841A:p.G281S	6.666e-05	23.6
16	28943836	16:28943836:C:T	C	T	0.000167392	2987	ADD	5.03115	2.31221	9.61904	0.00192571	exonic	CD19	.	synonymous_SNV	CD19:NM_001178098:exon2:c.C258T:p.N86N,CD19:NM_001770:exon2:c.C258T:p.N86N	2.695e-05	2.399
16	31152020	16:31152020:AGCTGG:A	AGCTGG	A	0.000167336	2988	ADD	5.03115	2.31221	9.61905	0.00192571	exonic	PRSS36	.	frameshift_deletion	PRSS36:NM_001258290:exon13:c.1940_1944del:p.A647Vfs*85,PRSS36:NM_001258291:exon13:c.1955_1959del:p.A652Vfs*43,PRSS36:NM_173502:exon13:c.1955_1959del:p.A652Vfs*85	0	32
16	57685510	16:57685510:G:A	G	A	0.000167448	2986	ADD	5.03114	2.31221	9.61902	0.00192571	exonic	ADGRG1	.	nonsynonymous_SNV	ADGRG1:NM_001145773:exon3:c.G478A:p.A160T,ADGRG1:NM_001370429:exon3:c.G463A:p.A155T,ADGRG1:NM_001370430:exon3:c.G463A:p.A155T,ADGRG1:NM_001370432:exon3:c.G463A:p.A155T,ADGRG1:NM_001370433:exon3:c.G478A:p.A160T,ADGRG1:NM_001370435:exon3:c.G463A:p.A155T,ADGRG1:NM_001370438:exon3:c.G463A:p.A155T,ADGRG1:NM_001370439:exon3:c.G463A:p.A155T,ADGRG1:NM_001370441:exon3:c.G463A:p.A155T,ADGRG1:NM_201525:exon…	3.25e-05	0.001
16	88724383	16:88724383:A:G	A	G	0.000167504	2985	ADD	5.03112	2.31219	9.61893	0.00192584	exonic	MVD	.	nonsynonymous_SNV	MVD:NM_002461:exon3:c.T196C:p.W66R	0.0004	23.3
16	1820694	16:1820694:G:C	G	C	0.000168577	2966	ADD	5.03074	2.31197	9.6174	0.00192744	exonic	NME3	.	nonsynonymous_SNV	NME3:NM_002513:exon5:c.C466G:p.L156V	2.448e-05	14.8
16	30536901	16:30536901:T:C	T	C	0.000334784	2987	ADD	4.58274	1.41963	9.6174	0.00192744	exonic	ZNF768	.	nonsynonymous_SNV	ZNF768:NM_024671:exon2:c.A560G:p.N187S	0.0015	0.029
15	64706333	15:64706333:C:T	C	T	0.000167392	2987	ADD	5.03569	2.31767	9.61695	0.00192788	exonic	TRIP4	.	synonymous_SNV	TRIP4:NM_001321924:exon8:c.C403T:p.L135L,TRIP4:NM_016213:exon8:c.C1093T:p.L365L	0	9.607
15	89195481	15:89195481:C:G	C	G	0.000167336	2988	ADD	5.03569	2.31767	9.61695	0.00192788	exonic	ISG20	.	nonsynonymous_SNV	ISG20:NM_001303235:exon2:c.C336G:p.D112E,ISG20:NM_001303233:exon3:c.C369G:p.D123E,ISG20:NM_001303236:exon3:c.C336G:p.D112E,ISG20:NM_001303237:exon3:c.C309G:p.D103E,ISG20:NM_002201:exon3:c.C369G:p.D123E,ISG20:NM_001303234:exon4:c.C369G:p.D123E	0	6.805
15	91478777	15:91478777:A:G	A	G	0.000167336	2988	ADD	5.03569	2.31767	9.61695	0.00192788	exonic	UNC45A	.	nonsynonymous_SNV	UNC45A:NM_001323621:exon2:c.A10G:p.S4G,UNC45A:NM_018671:exon2:c.A55G:p.S19G,UNC45A:NM_001323619:exon3:c.A55G:p.S19G,UNC45A:NM_001039675:exon5:c.A10G:p.S4G	0	20.8
16	30581598	16:30581598:G:C	G	C	0.000335796	2978	ADD	4.58252	1.41963	9.61585	0.00192903	exonic	ZNF688	.	nonsynonymous_SNV	ZNF688:NM_001024683:exon3:c.C428G:p.A143G,ZNF688:NM_145271:exon3:c.C470G:p.A157G	9.01e-06	11.25
1	22913111	1:22913111:C:T	C	T	0.000335233	2983	ADD	4.81805	1.52775	9.61561	0.0019293	exonic	EPHA8	.	nonsynonymous_SNV	EPHA8:NM_001006943:exon4:c.C962T:p.P321L,EPHA8:NM_020526:exon4:c.C962T:p.P321L	0.0392	21.3
17	38345468	17:38345468:C:T	C	T	0.000167336	2988	ADD	5.02882	2.31185	9.61414	0.00193086	exonic	RAPGEFL1	.	nonsynonymous_SNV	RAPGEFL1:NM_001303533:exon6:c.C502T:p.R168C,RAPGEFL1:NM_001303534:exon6:c.C484T:p.R162C	5.798e-05	27.2
17	650619	17:650619:C:T	C	T	0.000167448	2986	ADD	5.02881	2.31185	9.61408	0.0019309	exonic	GEMIN4	.	nonsynonymous_SNV	GEMIN4:NM_015721:exon2:c.G664A:p.G222R	0.0003	24.5
17	1442224	17:1442224:G:A	G	A	0.000167448	2986	ADD	5.02881	2.31185	9.61408	0.0019309	exonic	PITPNA	.	nonsynonymous_SNV	PITPNA:NM_006224:exon7:c.C395T:p.A132V	0.0001	16.63
17	77755891	17:77755891:C:CG	C	CG	0.000167336	2988	ADD	5.02879	2.31183	9.614	0.00193099	exonic	CBX2	.	frameshift_insertion	CBX2:NM_032647:exon4:c.579_580insG:p.F194Vfs*29	0.0002	1.362
17	77755892	17:77755892:T:G	T	G	0.000167392	2987	ADD	5.02878	2.31183	9.61398	0.00193103	exonic	CBX2	.	nonsynonymous_SNV	CBX2:NM_032647:exon4:c.T580G:p.F194V	0.0002	2.071
17	3379531	17:3379531:C:T	C	T	0.000167898	2978	ADD	5.0287	2.31178	9.61363	0.00193139	exonic	ASPA	.	synonymous_SNV	ASPA:NM_000049:exon1:c.C78T:p.T26T,ASPA:NM_001128085:exon2:c.C78T:p.T26T	0.0001	7.086
17	42751534	17:42751534:G:A	G	A	0.000167898	2978	ADD	5.02864	2.31175	9.61343	0.00193161	exonic	MEIOC	.	nonsynonymous_SNV	MEIOC:NM_001145080:exon8:c.G2829A:p.M943I	1.805e-05	22.3
17	53488618	17:53488618:C:A	C	A	0.000168011	2976	ADD	5.02857	2.31171	9.61316	0.00193188	exonic	MMD	.	nonsynonymous_SNV	MMD:NM_012329:exon3:c.G269T:p.R90M	0.0001	37
5	38921777	5:38921777:C:T	C	T	0.00016728	2989	ADD	5.02707	2.31178	9.60961	0.00193562	exonic	OSMR	.	nonsynonymous_SNV	OSMR:NM_001323505:exon12:c.C1646T:p.P549L,OSMR:NM_001323506:exon12:c.C1649T:p.P550L,OSMR:NM_003999:exon12:c.C1646T:p.P549L	0	23.8
5	95088007	5:95088007:T:C	T	C	0.000167448	2986	ADD	5.02703	2.31176	9.60945	0.0019358	exonic	RHOBTB3	.	nonsynonymous_SNV	RHOBTB3:NM_014899:exon5:c.T635C:p.M212T	0	20.5
6	25472745	6:25472745:T:A	T	A	0.000334896	2986	ADD	4.57086	1.41555	9.60871	0.00193656	exonic	CARMIL1	.	nonsynonymous_SNV	CARMIL1:NM_001173977:exon11:c.T870A:p.D290E,CARMIL1:NM_017640:exon11:c.T870A:p.D290E	0.0001	18.96
5	110428283	5:110428283:A:G	A	G	0.00016835	2970	ADD	5.02677	2.31161	9.60845	0.00193682	exonic	WDR36	.	synonymous_SNV	WDR36:NM_139281:exon1:c.A297G:p.T99T	2.748e-05	13.5
5	137622189	5:137622189:C:T	C	T	0.000168294	2971	ADD	5.02672	2.31158	9.60824	0.00193705	exonic	CDC25C	.	nonsynonymous_SNV	CDC25C:NM_022809:exon9:c.G938A:p.R313Q,CDC25C:NM_001364028:exon10:c.G1028A:p.R343Q,CDC25C:NM_001364026:exon11:c.G1328A:p.R443Q,CDC25C:NM_001364027:exon11:c.G1055A:p.R352Q,CDC25C:NM_001287582:exon12:c.G1157A:p.R386Q,CDC25C:NM_001287583:exon12:c.G1391A:p.R464Q,CDC25C:NM_001318098:exon12:c.G1208A:p.R403Q,CDC25C:NM_001790:exon12:c.G1157A:p.R386Q	5.849e-05	24.7
12	88481688	12:88481688:G:A	G	A	0.000335683	2979	ADD	4.63922	1.44625	9.60752	0.0019378	exonic	CEP290	.	nonsynonymous_SNV	CEP290:NM_025114:exon32:c.C4063T:p.R1355C	0.0003	32
16	74657913	16:74657913:C:T	C	T	0.000334896	2986	ADD	4.81378	2.19326	9.60731	0.00193803	exonic	RFWD3	.	synonymous_SNV	RFWD3:NM_001370536:exon12:c.G2061A:p.V687V,RFWD3:NM_001370539:exon12:c.G1404A:p.V468V,RFWD3:NM_001370534:exon13:c.G2238A:p.V746V,RFWD3:NM_001370543:exon13:c.G1404A:p.V468V,RFWD3:NM_018124:exon13:c.G2238A:p.V746V,RFWD3:NM_001370535:exon14:c.G2238A:p.V746V,RFWD3:NM_001370537:exon14:c.G1404A:p.V468V,RFWD3:NM_001370540:exon14:c.G1404A:p.V468V,RFWD3:NM_001370542:exon14:c.G1404A:p.V468V	0.0086	7.257
17	80012647	17:80012647:C:T	C	T	0.000173491	2882	ADD	5.02669	2.31061	9.60574	0.00193968	exonic	GPS1	.	synonymous_SNV	GPS1:NM_001321092:exon4:c.C570T:p.S190S,GPS1:NM_001330539:exon4:c.C570T:p.S190S,GPS1:NM_001330541:exon4:c.C582T:p.S194S,GPS1:NM_004127:exon4:c.C582T:p.S194S,GPS1:NM_212492:exon4:c.C690T:p.S230S,GPS1:NM_001321089:exon5:c.C786T:p.S262S,GPS1:NM_001321090:exon5:c.C774T:p.S258S,GPS1:NM_001321091:exon5:c.C774T:p.S258S,GPS1:NM_001321093:exon5:c.C522T:p.S174S	0.0002	12.06
17	4693153	17:4693153:G:A	G	A	0.000174034	2873	ADD	5.02651	2.31051	9.605	0.00194048	exonic	GLTPD2	.	synonymous_SNV	GLTPD2:NM_001014985:exon4:c.G438A:p.E146E	0.0003	9.058
11	134183290	11:134183290:G:A	G	A	0.00050184	2989	ADD	4.12167	1.34472	9.60402	0.00194151	exonic	GLB1L3	.	nonsynonymous_SNV	GLB1L3:NM_001080407:exon16:c.G1501A:p.D501N	0.0036	15.98
11	120298916	11:120298916:C:T	C	T	0.00251088	2987	ADD	2.9953	0.74089	9.5963	0.00194971	exonic	ARHGEF12	.	nonsynonymous_SNV	ARHGEF12:NM_001198665:exon7:c.C488T:p.S163F,ARHGEF12:NM_001301084:exon8:c.C236T:p.S79F,ARHGEF12:NM_015313:exon8:c.C545T:p.S182F	0.0023	22.9
20	35526858	20:35526858:C:G	C	G	0.00200736	2989	ADD	3.00555	0.761853	9.595	0.0019511	exonic	SAMHD1	.	nonsynonymous_SNV	SAMHD1:NM_001363733:exon14:c.G1593C:p.R531S,SAMHD1:NM_015474:exon14:c.G1593C:p.R531S	0.001	15.66
9	133511486	9:133511486:G:A	G	A	0.000334784	2987	ADD	4.63052	1.44394	9.59371	0.00195245	exonic	FUBP3	.	synonymous_SNV	FUBP3:NM_003934:exon18:c.G1683A:p.T561T	0.0006	3.149
1	26507075	1:26507075:G:A	G	A	0.000669344	2988	ADD	4.3987	1.1099	9.59329	0.0019529	exonic	CNKSR1	.	nonsynonymous_SNV	CNKSR1:NM_001297647:exon2:c.G184A:p.G62S,CNKSR1:NM_006314:exon2:c.G184A:p.G62S	0.0009	17.82
11	62763206	11:62763206:C:T	C	T	0.000334784	2987	ADD	4.73754	1.49345	9.59198	0.00195429	exonic	SLC22A8	.	nonsynonymous_SNV	SLC22A8:NM_001184736:exon6:c.G602A:p.R201H,SLC22A8:NM_001184732:exon7:c.G971A:p.R324H,SLC22A8:NM_001184733:exon7:c.G698A:p.R233H,SLC22A8:NM_004254:exon7:c.G971A:p.R324H	0.0006	26.2
2	100052316	2:100052316:C:T	C	T	0.000336022	2976	ADD	4.62969	1.44432	9.59186	0.00195443	exonic	REV1	.	nonsynonymous_SNV	REV1:NM_001037872:exon7:c.G1301A:p.R434Q,REV1:NM_001321454:exon7:c.G1301A:p.R434Q,REV1:NM_016316:exon7:c.G1301A:p.R434Q,REV1:NM_001321455:exon8:c.G1091A:p.R364Q	0.0005	32
23	153585830	X:153585830:G:A	G	A	0.000503694	2978	ADD	2.54817	0.981969	9.5795	0.00196761	exonic	FLNA	.	synonymous_SNV	FLNA:NM_001110556:exon29:c.C4917T:p.T1639T,FLNA:NM_001456:exon29:c.C4917T:p.T1639T	8.877e-05	NA
4	6606864	4:6606864:A:G	A	G	0.51206	2985	ADD	0.549536	0.173092	9.57916	0.00196798	exonic	MAN2B2	.	nonsynonymous_SNV	MAN2B2:NM_001292038:exon11:c.A1469G:p.N490S,MAN2B2:NM_015274:exon11:c.A1622G:p.N541S	0.6356	0.959
12	123430616	12:123430616:T:C	T	C	0.00033456	2989	ADD	4.55954	1.41541	9.57615	0.0019712	exonic	ABCB9	.	nonsynonymous_SNV	ABCB9:NM_001243013:exon6:c.A1207G:p.R403G,ABCB9:NM_001243014:exon6:c.A1207G:p.R403G,ABCB9:NM_019624:exon6:c.A1207G:p.R403G,ABCB9:NM_019625:exon6:c.A1207G:p.R403G,ABCB9:NM_203444:exon6:c.A1207G:p.R403G	6.685e-05	22.9
7	943795	7:943795:G:A	G	A	0.00016728	2989	ADD	5.02036	2.31643	9.57548	0.00197192	exonic	ADAP1	.	nonsynonymous_SNV	ADAP1:NM_001284311:exon4:c.C331T:p.R111C,ADAP1:NM_001284310:exon5:c.C400T:p.R134C,ADAP1:NM_001284308:exon6:c.C649T:p.R217C,ADAP1:NM_001284309:exon6:c.C400T:p.R134C,ADAP1:NM_006869:exon6:c.C616T:p.R206C	6.578e-05	23.3
7	8790755	7:8790755:C:T	C	T	0.00016728	2989	ADD	5.02036	2.31643	9.57548	0.00197192	exonic	NXPH1	.	nonsynonymous_SNV	NXPH1:NM_152745:exon3:c.C172T:p.L58F	0	22.7
7	47317717	7:47317717:T:C	T	C	0.00016728	2989	ADD	5.02036	2.31643	9.57548	0.00197192	exonic	TNS3	.	nonsynonymous_SNV	TNS3:NM_022748:exon31:c.A4295G:p.N1432S	3.584e-05	24.2
7	150831529	7:150831529:C:T	C	T	0.000167336	2988	ADD	5.02035	2.31643	9.57547	0.00197192	exonic	AGAP3	.	nonsynonymous_SNV	AGAP3:NM_001281300:exon11:c.C685T:p.R229W,AGAP3:NM_001350102:exon11:c.C1369T:p.R457W,AGAP3:NM_031946:exon11:c.C1369T:p.R457W,AGAP3:NM_001350103:exon12:c.C331T:p.R111W,AGAP3:NM_001350104:exon12:c.C331T:p.R111W	3.655e-05	26.8
7	939745	7:939745:C:T	C	T	0.000167336	2988	ADD	5.02035	2.31643	9.57545	0.00197197	exonic	ADAP1	.	synonymous_SNV	ADAP1:NM_001284311:exon6:c.G504A:p.G168G,ADAP1:NM_001284310:exon7:c.G573A:p.G191G,ADAP1:NM_001284308:exon8:c.G822A:p.G274G,ADAP1:NM_001284309:exon8:c.G573A:p.G191G,ADAP1:NM_006869:exon8:c.G789A:p.G263G	2.692e-05	1.503
7	33423287	7:33423287:G:A	G	A	0.000168976	2959	ADD	5.01976	2.31609	9.57316	0.00197442	exonic	BBS9	.	nonsynonymous_SNV	BBS9:NM_001348044:exon14:c.G1328A:p.R443H,BBS9:NM_001348046:exon15:c.G1433A:p.R478H,BBS9:NM_001348040:exon16:c.G1679A:p.R560H,BBS9:NM_001348045:exon16:c.G1433A:p.R478H,BBS9:NM_014451:exon16:c.G1679A:p.R560H,BBS9:NM_001033604:exon17:c.G1694A:p.R565H,BBS9:NM_001033605:exon17:c.G1784A:p.R595H,BBS9:NM_001348037:exon17:c.G1433A:p.R478H,BBS9:NM_001348039:exon17:c.G1421A:p.R474H,BBS9:NM_001348042:exon17…	0.0002	32
11	102248825	11:102248825:G:A	G	A	0.000336247	2974	ADD	4.92879	1.59135	9.57122	0.00197651	exonic	BIRC2	.	nonsynonymous_SNV	BIRC2:NM_001166:exon9:c.G1768A:p.V590I,BIRC2:NM_001256163:exon9:c.G1768A:p.V590I,BIRC2:NM_001256166:exon9:c.G1621A:p.V541I	0.0003	28.5
7	65551762	7:65551762:C:T	C	T	0.000170242	2937	ADD	5.01902	2.31566	9.57038	0.00197742	exonic	ASL	.	nonsynonymous_SNV	ASL:NM_001024943:exon7:c.C556T:p.R186W,ASL:NM_001024944:exon7:c.C556T:p.R186W,ASL:NM_000048:exon8:c.C556T:p.R186W	1.035e-05	24.8
20	3025119	20:3025119:C:G	C	G	0.00016728	2989	ADD	5.01427	2.31229	9.5698	0.00197806	exonic	GNRH2	.	nonsynonymous_SNV	GNRH2:NM_001310220:exon2:c.C59G:p.P20R,GNRH2:NM_001501:exon2:c.C59G:p.P20R,GNRH2:NM_178331:exon2:c.C59G:p.P20R,GNRH2:NM_178332:exon2:c.C59G:p.P20R	8.955e-06	11.09
20	44416476	20:44416476:C:T	C	T	0.00016728	2989	ADD	5.01427	2.31229	9.5698	0.00197806	exonic	WFDC3	.	synonymous_SNV	WFDC3:NM_080614:exon4:c.G357A:p.L119L	0	8.402
20	46311903	20:46311903:A:G	A	G	0.00016728	2989	ADD	5.01427	2.31229	9.5698	0.00197806	exonic	SULF2	.	nonsynonymous_SNV	SULF2:NM_001161841:exon7:c.T899C:p.M300T,SULF2:NM_018837:exon7:c.T899C:p.M300T,SULF2:NM_198596:exon7:c.T899C:p.M300T	1.828e-05	21.9
20	62863709	20:62863709:C:T	C	T	0.00016728	2989	ADD	5.01427	2.31229	9.5698	0.00197806	exonic	MYT1	.	synonymous_SNV	MYT1:NM_004535:exon19:c.C2868T:p.H956H	0.0033	5.051
11	62472993	11:62472993:G:A	G	A	0.000334896	2986	ADD	4.60913	1.43805	9.56907	0.00197884	exonic	BSCL2	.	nonsynonymous_SNV	BSCL2:NM_001122955:exon2:c.C184T:p.L62F	0.0001	15.36
3	51895693	3:51895693:G:A	G	A	0.0666667	2985	ADD	-1.54674	0.577095	9.56845	0.00197947	exonic	IQCF2	.	nonsynonymous_SNV	IQCF2:NM_203424:exon1:c.G11A:p.R4Q	0.0733	1.464
10	5139644	10:5139644:C:T	C	T	0.000502344	2986	ADD	4.43715	1.19939	9.56844	0.00197952	exonic	AKR1C3	.	stopgain	AKR1C3:NM_001253908:exon3:c.C271T:p.R91X,AKR1C3:NM_001253909:exon3:c.C271T:p.R91X,AKR1C3:NM_003739:exon3:c.C271T:p.R91X	0.0008	38
23	48682140	X:48682140:G:A	G	A	0.00301104	2989	ADD	2.05238	0.576309	9.56633	0.0019818	exonic	HDAC6	.	nonsynonymous_SNV	HDAC6:NM_001321226:exon26:c.G3248A:p.G1083D,HDAC6:NM_001321227:exon26:c.G3248A:p.G1083D,HDAC6:NM_001321228:exon26:c.G3248A:p.G1083D,HDAC6:NM_001321229:exon26:c.G3248A:p.G1083D,HDAC6:NM_006044:exon26:c.G3248A:p.G1083D,HDAC6:NM_001321225:exon27:c.G3290A:p.G1097D	0.0037	NA
14	102391518	14:102391518:G:T	G	T	0.00100402	2988	ADD	3.16625	0.900654	9.56351	0.00198481	exonic	PPP2R5C	.	nonsynonymous_SNV	PPP2R5C:NM_001352912:exon13:c.G1367T:p.R456L,PPP2R5C:NM_178586:exon13:c.G1367T:p.R456L,PPP2R5C:NM_001352916:exon14:c.G1142T:p.R381L,PPP2R5C:NM_002719:exon14:c.G1484T:p.R495L,PPP2R5C:NM_001161726:exon15:c.G1532T:p.R511L,PPP2R5C:NM_001352914:exon15:c.G1547T:p.R516L,PPP2R5C:NM_001352915:exon15:c.G1259T:p.R420L,PPP2R5C:NM_001161725:exon16:c.G1577T:p.R526L,PPP2R5C:NM_001352913:exon16:c.G1649T:p.R550L	0.001	29.2
16	3586230	16:3586230:C:T	C	T	0.202285	2976	ADD	-0.750585	0.24915	9.56031	0.00198829	exonic	CLUAP1	.	nonsynonymous_SNV	CLUAP1:NM_024793:exon8:c.C703T:p.R235W,CLUAP1:NM_015041:exon12:c.C1201T:p.R401W,CLUAP1:NM_001330454:exon13:c.C1258T:p.R420W	0.2857	22.8
5	79029501	5:79029501:G:A	G	A	0.000335458	2981	ADD	4.57436	1.42427	9.56029	0.00198834	exonic	CMYA5	.	nonsynonymous_SNV	CMYA5:NM_153610:exon2:c.G4913A:p.G1638E	0.0002	0.039
17	39881003	17:39881003:C:T	C	T	0.000335909	2977	ADD	4.56991	1.4229	9.55771	0.00199109	exonic	HAP1	.	nonsynonymous_SNV	HAP1:NM_001079870:exon10:c.G1759A:p.G587R,HAP1:NM_001079871:exon10:c.G1735A:p.G579R,HAP1:NM_177977:exon11:c.G1810A:p.G604R	0.046	2.98
1	55625328	1:55625328:T:C	T	C	0.000334672	2988	ADD	4.57181	2.14073	9.55622	0.00199274	exonic	USP24	.	nonsynonymous_SNV	USP24:NM_015306:exon9:c.A1024G:p.I342V	0.0166	19.89
15	101529594	15:101529594:G:A	G	A	0.0478741	2987	ADD	0.9627	0.280033	9.55412	0.00199503	exonic	LRRK1	.	synonymous_SNV	LRRK1:NM_024652:exon6:c.G753A:p.P251P	0.3437	0.791
3	3887219	3:3887219:C:T	C	T	0.000503356	2980	ADD	3.46402	1.22383	9.53503	0.00201586	exonic	LRRN1	.	synonymous_SNV	LRRN1:NM_020873:exon2:c.C894T:p.G298G,LRRN1:NM_001324188:exon3:c.C894T:p.G298G,LRRN1:NM_001324189:exon3:c.C894T:p.G298G	0.0079	8.555
15	64680061	15:64680061:A:G	A	G	0.000344116	2906	ADD	4.66665	1.46853	9.53182	0.00201939	UTR5	TRIP4	NM_016213:c.-2A>G\x3bNM_001321924:c.-12953A>G	.	.	0.0001	22.5
11	111949003	11:111949003:G:A	G	A	0.000334672	2988	ADD	4.56127	1.42278	9.53164	0.00201958	exonic	NKAPD1	.	nonsynonymous_SNV	NKAPD1:NM_001082969:exon3:c.G134A:p.R45Q,NKAPD1:NM_001082970:exon3:c.G134A:p.R45Q,NKAPD1:NM_001301017:exon3:c.G134A:p.R45Q,NKAPD1:NM_001301019:exon3:c.G47A:p.R16Q,NKAPD1:NM_001301021:exon3:c.G47A:p.R16Q,NKAPD1:NM_018195:exon3:c.G134A:p.R45Q	0.0001	13.85
17	12819243	17:12819243:C:T	C	T	0.000335121	2984	ADD	4.54543	1.41693	9.52504	0.00202689	exonic	ARHGAP44	.	nonsynonymous_SNV	ARHGAP44:NM_001321164:exon5:c.C302T:p.T101M,ARHGAP44:NM_001321166:exon5:c.C302T:p.T101M,ARHGAP44:NM_001321167:exon5:c.C302T:p.T101M,ARHGAP44:NM_014859:exon5:c.C302T:p.T101M	0.0004	25.1
11	110008024	11:110008024:C:T	C	T	0.00201884	2972	ADD	2.99566	0.761877	9.52191	0.00203035	exonic	ZC3H12C	.	nonsynonymous_SNV	ZC3H12C:NM_033390:exon2:c.C658T:p.R220W	0.0021	24.7
2	26501498	2:26501498:T:C	T	C	0.000167336	2988	ADD	5	2.31446	9.51973	0.00203273	exonic	HADHB	.	synonymous_SNV	HADHB:NM_001281512:exon7:c.T414C:p.A138A,HADHB:NM_000183:exon8:c.T459C:p.A153A,HADHB:NM_001281513:exon9:c.T393C:p.A131A	0	11.37
2	160798476	2:160798476:G:A	G	A	0.000167392	2987	ADD	5	2.31446	9.51969	0.00203278	exonic	PLA2R1	.	nonsynonymous_SNV	PLA2R1:NM_001195641:exon30:c.C4199T:p.A1400V,PLA2R1:NM_007366:exon30:c.C4205T:p.A1402V	0.0002	10.72
2	207026151	2:207026151:T:G	T	G	0.000167448	2986	ADD	5	2.31446	9.51962	0.00203287	exonic	EEF1B2	.	nonsynonymous_SNV	EEF1B2:NM_001959:exon3:c.T285G:p.S95R,EEF1B2:NM_001037663:exon4:c.T285G:p.S95R,EEF1B2:NM_021121:exon4:c.T285G:p.S95R	6.669e-05	18.26
2	160285739	2:160285739:G:A	G	A	0.000167616	2983	ADD	5	2.31446	9.51956	0.00203292	exonic	BAZ2B	.	nonsynonymous_SNV	BAZ2B:NM_001329857:exon10:c.C2038T:p.R680C,BAZ2B:NM_001289975:exon11:c.C2221T:p.R741C,BAZ2B:NM_001329858:exon11:c.C2227T:p.R743C,BAZ2B:NM_013450:exon11:c.C2227T:p.R743C	0.0002	29.6
2	223496332	2:223496332:G:A	G	A	0.000167504	2985	ADD	5	2.31446	9.51914	0.00203339	exonic	FARSB	.	synonymous_SNV	FARSB:NM_005687:exon8:c.C777T:p.D259D	8.98e-06	10.09
2	61149649	2:61149649:A:G	A	G	0.000168237	2972	ADD	5	2.31446	9.51857	0.00203404	exonic	REL	.	synonymous_SNV	REL:NM_001291746:exon10:c.A1743G:p.P581P,REL:NM_002908:exon11:c.A1839G:p.P613P	9.36e-06	6.117
2	109087238	2:109087238:G:A	G	A	0.00016818	2973	ADD	5	2.31446	9.51851	0.00203409	exonic	GCC2	.	nonsynonymous_SNV	GCC2:NM_181453:exon6:c.G1453A:p.E485K	0	25.4
7	150845788	7:150845788:C:T	C	T	0.000334784	2987	ADD	4.54317	1.41712	9.51792	0.00203475	exonic	GBX1	.	nonsynonymous_SNV	GBX1:NM_001098834:exon2:c.G980A:p.R327H	0.0024	24.7
11	72945640	11:72945640:C:G	C	G	0.000704722	2838	ADD	3.91655	1.24867	9.51547	0.00203746	exonic	P2RY2	.	nonsynonymous_SNV	P2RY2:NM_002564:exon3:c.C436G:p.R146G,P2RY2:NM_176071:exon3:c.C436G:p.R146G,P2RY2:NM_176072:exon3:c.C436G:p.R146G	0.001	23.7
7	100419931	7:100419931:G:A	G	A	0.000341763	2926	ADD	4.65934	1.46842	9.51484	0.00203817	exonic	EPHB4	.	nonsynonymous_SNV	EPHB4:NM_004444:exon4:c.C770T:p.P257L	0.0006	21.8
15	69652451	15:69652451:G:A	G	A	0.0338585	2983	ADD	1.10878	0.319133	9.51004	0.00204353	exonic	PAQR5	.	nonsynonymous_SNV	PAQR5:NM_001104554:exon3:c.G32A:p.S11N,PAQR5:NM_017705:exon3:c.G32A:p.S11N	0.1678	3.164
17	7291802	17:7291802:C:T	C	T	0.000334896	2986	ADD	4.64943	1.46564	9.50991	0.00204367	exonic	TNK1	.	stopgain	TNK1:NM_001251902:exon11:c.C1570T:p.R524X,TNK1:NM_003985:exon11:c.C1555T:p.R519X	0.0003	40
7	135369002	7:135369002:G:A	G	A	0.000334672	2988	ADD	4.82303	1.549	9.50414	0.00205008	exonic	SLC13A4	.	nonsynonymous_SNV	SLC13A4:NM_001318192:exon15:c.C1616T:p.T539M,SLC13A4:NM_012450:exon15:c.C1613T:p.T538M	0.0008	29.2
15	42740370	15:42740370:G:A	G	A	0.000334672	2988	ADD	4.54968	1.42213	9.50323	0.00205111	exonic	ZNF106	.	nonsynonymous_SNV	ZNF106:NM_001284306:exon2:c.C521T:p.A174V,ZNF106:NM_022473:exon3:c.C2966T:p.A989V,ZNF106:NM_001284307:exon4:c.C650T:p.A217V,ZNF106:NM_001366844:exon4:c.C650T:p.A217V,ZNF106:NM_001366845:exon6:c.C3035T:p.A1012V,ZNF106:NM_001366846:exon6:c.C3035T:p.A1012V	0.0073	13.12
9	133370298	9:133370298:G:A	G	A	0.000334784	2987	ADD	4.56394	1.42825	9.50314	0.00205121	exonic	ASS1	.	nonsynonymous_SNV	ASS1:NM_054012:exon13:c.G1015A:p.A339T,ASS1:NM_000050:exon14:c.G1015A:p.A339T	0.0007	20.9
12	64615991	12:64615991:G:C	G	C	0.000335345	2982	ADD	4.54055	1.41816	9.50274	0.00205163	exonic	C12orf66	.	synonymous_SNV	C12orf66:NM_001300940:exon1:c.C27G:p.A9A,C12orf66:NM_001300941:exon1:c.C27G:p.A9A,C12orf66:NM_152440:exon1:c.C27G:p.A9A	0.0006	13.79
1	227333195	1:227333195:T:A	T	A	0.000503863	2977	ADD	4.46303	1.22236	9.50059	0.00205405	exonic	CDC42BPA	.	nonsynonymous_SNV	CDC42BPA:NM_001366010:exon8:c.A1138T:p.N380Y,CDC42BPA:NM_001366011:exon8:c.A1138T:p.N380Y,CDC42BPA:NM_001366019:exon8:c.A1138T:p.N380Y,CDC42BPA:NM_003607:exon8:c.A1138T:p.N380Y,CDC42BPA:NM_014826:exon8:c.A1138T:p.N380Y	0.001	25.7
3	196730941	3:196730941:G:A	G	A	0.00033456	2989	ADD	4.60833	1.44875	9.49803	0.00205693	exonic	MELTF	.	synonymous_SNV	MELTF:NM_005929:exon15:c.C1968T:p.N656N	0.0003	4.241
5	140249670	5:140249670:C:T	C	T	0.000334784	2987	ADD	4.54174	1.4195	9.49632	0.00205883	exonic	PCDHA11	.	nonsynonymous_SNV	PCDHA11:NM_018902:exon1:c.C982T:p.P328S,PCDHA11:NM_031861:exon1:c.C982T:p.P328S	0.001	22.9
15	74472461	15:74472461:C:T	C	T	0.000335683	2979	ADD	4.61773	1.45351	9.49389	0.00206158	exonic	STRA6	.	nonsynonymous_SNV	STRA6:NM_001142617:exon19:c.G1964A:p.R655H,STRA6:NM_001142618:exon19:c.G1964A:p.R655H,STRA6:NM_001142619:exon19:c.G1937A:p.R646H,STRA6:NM_001199040:exon19:c.G2075A:p.R692H,STRA6:NM_001199041:exon19:c.G2009A:p.R670H,STRA6:NM_001199042:exon19:c.G2081A:p.R694H,STRA6:NM_022369:exon19:c.G1964A:p.R655H	4.486e-05	27.1
9	136918426	9:136918426:G:A	G	A	0.000334672	2988	ADD	4.55833	1.42743	9.4923	0.00206338	exonic	BRD3	.	synonymous_SNV	BRD3:NM_007371:exon2:c.C174T:p.P58P	0.0099	8.591
6	152540258	6:152540258:C:T	C	T	0.000334896	2986	ADD	4.54841	1.42323	9.49082	0.00206505	exonic	SYNE1	.	synonymous_SNV	SYNE1:NM_033071:exon119:c.G21711A:p.E7237E,SYNE1:NM_182961:exon120:c.G21924A:p.E7308E	0.0012	6.253
5	118810140	5:118810140:G:C	G	C	0.000334672	2988	ADD	4.53388	1.41815	9.48381	0.00207291	exonic	HSD17B4	.	nonsynonymous_SNV	HSD17B4:NM_001199292:exon3:c.G211C:p.A71P,HSD17B4:NM_000414:exon4:c.G265C:p.A89P,HSD17B4:NM_001199291:exon5:c.G340C:p.A114P,HSD17B4:NM_001292027:exon5:c.G193C:p.A65P	0	23.7
2	169870844	2:169870844:C:T	C	T	0.0003367	2970	ADD	4.53095	1.41664	9.48338	0.00207343	exonic	ABCB11	.	nonsynonymous_SNV	ABCB11:NM_003742:exon4:c.G119A:p.G40D	6.669e-05	0.556
19	42301763	19:42301763:A:C	A	C	0.000502681	2984	ADD	4.47281	1.23139	9.48207	0.00207491	exonic	CEACAM3	.	nonsynonymous_SNV	CEACAM3:NM_001277163:exon2:c.A307C:p.T103P,CEACAM3:NM_001815:exon2:c.A307C:p.T103P	0.1226	0.006
3	53781458	3:53781458:G:A	G	A	0.000502008	2988	ADD	4.52157	1.31297	9.47995	0.0020773	exonic	CACNA1D	.	synonymous_SNV	CACNA1D:NM_001128839:exon26:c.G3297A:p.T1099T,CACNA1D:NM_001128840:exon26:c.G3297A:p.T1099T,CACNA1D:NM_000720:exon27:c.G3357A:p.T1119T	0.0005	2.816
6	131973721	6:131973721:C:A	C	A	0.000502344	2986	ADD	4.48463	1.27431	9.47156	0.0020868	exonic	ENPP3	.	nonsynonymous_SNV	ENPP3:NM_005021:exon4:c.C317A:p.T106N	0.0012	9.732
18	3126888	18:3126888:T:C	T	C	0.00033456	2989	ADD	4.6944	1.49337	9.4679	0.00209098	exonic	MYOM1	.	synonymous_SNV	MYOM1:NM_019856:exon18:c.A2514G:p.P838P,MYOM1:NM_003803:exon19:c.A2802G:p.P934P	0.074	3.413
9	88967992	9:88967992:T:A	T	A	0.000167336	2988	ADD	4.97695	2.31237	9.46151	0.00209826	exonic	TUT7	.	nonsynonymous_SNV	TUT7:NM_001185059:exon2:c.A123T:p.K41N,TUT7:NM_001185074:exon2:c.A123T:p.K41N,TUT7:NM_024617:exon2:c.A123T:p.K41N	8.968e-06	17.92
9	96847032	9:96847032:A:G	A	G	0.000167336	2988	ADD	4.97695	2.31237	9.46151	0.00209826	exonic	PTPDC1	.	nonsynonymous_SNV	PTPDC1:NM_001253829:exon1:c.A220G:p.T74A,PTPDC1:NM_152422:exon1:c.A220G:p.T74A	6.665e-05	16.74
9	130475091	9:130475091:C:T	C	T	0.000167392	2987	ADD	4.97693	2.31235	9.46143	0.00209836	exonic	CFAP157	.	nonsynonymous_SNV	CFAP157:NM_001012502:exon7:c.C1241T:p.T414M	0.0015	0.364
9	98691009	9:98691009:C:T	C	T	0.000168011	2976	ADD	4.97657	2.31215	9.4601	0.00209991	exonic	ERCC6L2	.	synonymous_SNV	ERCC6L2:NM_001010895:exon11:c.C1614T:p.D538D,ERCC6L2:NM_020207:exon11:c.C1647T:p.D549D	0.004	4.786
23	129159031	X:129159031:CAGA:C	CAGA	C	0.00050184	2989	ADD	4.4144	1.21014	9.45887	0.00210131	exonic	BCORL1	.	nonframeshift_deletion	BCORL1:NM_001184772:exon6:c.3756_3758del:p.E1257del,BCORL1:NM_021946:exon6:c.3756_3758del:p.E1257del	0.0005	NA
2	11913806	2:11913806:G:A	G	A	0.000335121	2984	ADD	5.00855	1.65441	9.45729	0.0021031	exonic	LPIN1	.	synonymous_SNV	LPIN1:NM_001349201:exon5:c.G657A:p.L219L,LPIN1:NM_001349203:exon5:c.G657A:p.L219L,LPIN1:NM_001349206:exon5:c.G657A:p.L219L,LPIN1:NM_001349207:exon5:c.G747A:p.L249L,LPIN1:NM_145693:exon5:c.G657A:p.L219L,LPIN1:NM_001261427:exon6:c.G675A:p.L225L,LPIN1:NM_001261428:exon6:c.G804A:p.L268L,LPIN1:NM_001349199:exon6:c.G657A:p.L219L,LPIN1:NM_001349200:exon6:c.G657A:p.L219L,LPIN1:NM_001349202:exon6:c.G657A:…	0.2244	0.126
1	156290656	1:156290656:T:C	T	C	0.0610776	2988	ADD	-1.55932	0.582816	9.45418	0.00210669	exonic	CCT3	.	nonsynonymous_SNV	CCT3:NM_001008800:exon5:c.A469G:p.I157V,CCT3:NM_005998:exon7:c.A583G:p.I195V	0.068	22.3
3	39184959	3:39184959:C:T	C	T	0.756839	2961	ADD	0.69847	0.230859	9.45204	0.00210916	exonic	CSRNP1	.	nonsynonymous_SNV	CSRNP1:NM_001320559:exon5:c.G1417A:p.V473I,CSRNP1:NM_001320560:exon5:c.G1357A:p.V453I,CSRNP1:NM_033027:exon5:c.G1357A:p.V453I	0.7966	8.231
5	179744009	5:179744009:T:G	T	G	0.168957	2983	ADD	0.64197	0.193262	9.4473	0.00211461	exonic	GFPT2	.	synonymous_SNV	GFPT2:NM_005110:exon11:c.A1008C:p.S336S	0.255	0.002
21	46930147	21:46930147:G:A	G	A	0.00118564	2952	ADD	3.2284	0.931586	9.44599	0.00211612	exonic	COL18A1	.	nonsynonymous_SNV	COL18A1:NM_030582:exon40:c.G4196A:p.R1399H,COL18A1:NM_130444:exon40:c.G4901A:p.R1634H,COL18A1:NM_130445:exon41:c.G3656A:p.R1219H	0.0067	26.1
16	3339613	16:3339613:G:C	G	C	0.000167392	2987	ADD	4.9761	2.31795	9.44266	0.00211997	exonic	ZNF263	.	synonymous_SNV	ZNF263:NM_005741:exon6:c.G1107C:p.P369P	0	0.126
17	48595988	17:48595988:G:C	G	C	0.172697	2985	ADD	-0.818708	0.27682	9.44266	0.00211997	exonic	MYCBPAP	.	nonsynonymous_SNV	MYCBPAP:NM_001366294:exon5:c.G600C:p.E200D,MYCBPAP:NM_032133:exon5:c.G555C:p.E185D	0.5964	21.7
16	31088355	16:31088355:G:A	G	A	0.000167448	2986	ADD	4.97608	2.31794	9.4426	0.00212002	exonic	ZNF646	.	nonsynonymous_SNV	ZNF646:NM_014699:exon2:c.G710A:p.R237Q	6.537e-05	27.3
16	75646270	16:75646270:C:T	C	T	0.000167448	2986	ADD	4.97608	2.31794	9.4426	0.00212002	exonic	ADAT1	.	nonsynonymous_SNV	ADAT1:NM_001324452:exon5:c.G653A:p.R218Q,ADAT1:NM_001324453:exon5:c.G653A:p.R218Q,ADAT1:NM_001324445:exon6:c.G914A:p.R305Q,ADAT1:NM_001324449:exon6:c.G914A:p.R305Q,ADAT1:NM_001324451:exon6:c.G467A:p.R156Q,ADAT1:NM_001324444:exon7:c.G467A:p.R156Q,ADAT1:NM_001324446:exon7:c.G467A:p.R156Q,ADAT1:NM_001324448:exon7:c.G914A:p.R305Q,ADAT1:NM_001324450:exon7:c.G467A:p.R156Q,ADAT1:NM_012091:exon7:c.G914A:…	0.0003	32
16	84438793	16:84438793:C:T	C	T	0.000167448	2986	ADD	4.97608	2.31794	9.4426	0.00212002	exonic	ATP2C2	.	synonymous_SNV	ATP2C2:NM_001286527:exon3:c.C270T:p.G90G,ATP2C2:NM_014861:exon3:c.C270T:p.G90G	0	9.664
16	56535370	16:56535370:G:A	G	A	0.000335008	2985	ADD	4.52188	1.41935	9.4406	0.00212236	exonic	BBS2	.	nonsynonymous_SNV	BBS2:NM_031885:exon10:c.C1120T:p.R374W	0.0001	23
16	30750911	16:30750911:G:T	G	T	0.000169262	2954	ADD	4.97531	2.31749	9.43978	0.00212329	exonic	SRCAP	.	nonsynonymous_SNV	SRCAP:NM_006662:exon34:c.G9550T:p.D3184Y	1.039e-05	26.8
8	26627747	8:26627747:G:T	G	T	0.000167336	2988	ADD	4.97152	2.31788	9.42958	0.00213511	exonic	ADRA1A	.	synonymous_SNV	ADRA1A:NM_000680:exon3:c.C1320A:p.T440T	8.143e-05	3.869
8	73849423	8:73849423:C:G	C	G	0.000167673	2982	ADD	4.97145	2.31783	9.4293	0.00213545	exonic	KCNB2	.	synonymous_SNV	KCNB2:NM_004770:exon3:c.C1833G:p.T611T	1.801e-05	0.609
7	45115434	7:45115434:C:T	C	T	0.00016728	2989	ADD	4.97501	2.31984	9.4289	0.0021359	exonic	CCM2	.	synonymous_SNV	CCM2:NM_001167935:exon8:c.C840T:p.T280T,CCM2:NM_001167934:exon9:c.C939T:p.T313T,CCM2:NM_001029835:exon10:c.C1176T:p.T392T,CCM2:NM_001363459:exon10:c.C1062T:p.T354T,CCM2:NM_031443:exon10:c.C1113T:p.T371T,CCM2:NM_001363458:exon11:c.C1236T:p.T412T	0	10.08
7	47840317	7:47840317:G:C	G	C	0.00016728	2989	ADD	4.97501	2.31984	9.4289	0.0021359	exonic	PKD1L1	.	nonsynonymous_SNV	PKD1L1:NM_138295:exon54:c.C8123G:p.S2708C	6.665e-05	20.7
7	150748949	7:150748949:G:A	G	A	0.000167336	2988	ADD	4.97501	2.31984	9.4289	0.00213594	exonic	ASIC3	.	nonsynonymous_SNV	ASIC3:NM_004769:exon7:c.G1267A:p.V423M,ASIC3:NM_020321:exon7:c.G1267A:p.V423M,ASIC3:NM_020322:exon7:c.G1267A:p.V423M	0.0002	23.6
7	92733227	7:92733227:T:C	T	C	0.000167392	2987	ADD	4.97499	2.31982	9.42881	0.00213604	exonic	SAMD9	.	synonymous_SNV	SAMD9:NM_001193307:exon2:c.A2184G:p.T728T,SAMD9:NM_017654:exon3:c.A2184G:p.T728T	2.979e-05	0.254
7	73791084	7:73791084:G:C	G	C	0.000167392	2987	ADD	4.97497	2.31981	9.42875	0.00213609	exonic	CLIP2	.	nonsynonymous_SNV	CLIP2:NM_032421:exon9:c.G2248C:p.E750Q,CLIP2:NM_003388:exon10:c.G2353C:p.E785Q	0	20.8
7	97821254	7:97821254:C:T	C	T	0.000167504	2985	ADD	4.97495	2.3198	9.42867	0.00213619	exonic	LMTK2	.	nonsynonymous_SNV	LMTK2:NM_014916:exon11:c.C1477T:p.H493Y	0	12.77
7	92923871	7:92923871:A:G	A	G	0.000167785	2980	ADD	4.9749	2.31977	9.42849	0.00213639	exonic	VPS50	.	nonsynonymous_SNV	VPS50:NM_017667:exon14:c.A1090G:p.I364V,VPS50:NM_001257998:exon15:c.A1000G:p.I334V	3.783e-05	16.71
7	6470161	7:6470161:G:C	G	C	0.00016756	2984	ADD	4.97489	2.31977	9.42845	0.00213644	exonic	DAGLB	.	synonymous_SNV	DAGLB:NM_139179:exon6:c.C879G:p.L293L	0	1.177
19	42342222	19:42342222:C:G	C	G	0.000335121	2984	ADD	4.51078	1.41625	9.42781	0.00213717	exonic	LYPD4	.	nonsynonymous_SNV	LYPD4:NM_001291419:exon4:c.G220C:p.V74L,LYPD4:NM_173506:exon4:c.G325C:p.V109L	0.0004	14.31
11	118081425	11:118081425:G:A	G	A	0.000335458	2981	ADD	4.51052	1.41628	9.42735	0.00213772	exonic	JAML	.	synonymous_SNV	JAML:NM_001286570:exon3:c.C84T:p.D28D,JAML:NM_001286571:exon3:c.C84T:p.D28D,JAML:NM_153206:exon3:c.C171T:p.D57D,JAML:NM_001098526:exon4:c.C201T:p.D67D	0.0059	0.308
7	72849028	7:72849028:G:A	G	A	0.00016852	2967	ADD	4.97458	2.31958	9.42719	0.00213791	exonic	FZD9	.	nonsynonymous_SNV	FZD9:NM_003508:exon1:c.G691A:p.A231T	0.0003	22.5
7	88964815	7:88964815:G:A	G	A	0.000168862	2961	ADD	4.97454	2.31956	9.42714	0.00213796	exonic	ZNF804B	.	nonsynonymous_SNV	ZNF804B:NM_181646:exon4:c.G2519A:p.S840N	0.0144	9.956
16	10995405	16:10995405:C:T	C	T	0.000502681	2984	ADD	4.643	1.3159	9.42705	0.00213806	exonic	CIITA	.	synonymous_SNV	CIITA:NM_000246:exon6:c.C471T:p.H157H,CIITA:NM_001286402:exon6:c.C474T:p.H158H,CIITA:NM_001286403:exon6:c.C471T:p.H157H	0.0003	7.425
7	1026403	7:1026403:C:T	C	T	0.000169377	2952	ADD	4.97427	2.3194	9.42613	0.00213914	exonic	CYP2W1	.	synonymous_SNV	CYP2W1:NM_017781:exon5:c.C789T:p.S263S	0.0001	5.511
8	100568808	8:100568808:G:A	G	A	0.000173491	2882	ADD	4.96986	2.3169	9.42319	0.00214259	exonic	VPS13B	.	nonsynonymous_SNV	VPS13B:NM_017890:exon31:c.G4951A:p.V1651I,VPS13B:NM_152564:exon31:c.G4876A:p.V1626I	8.103e-05	13.64
12	124414988	12:124414988:C:T	C	T	0.000334672	2988	ADD	4.70045	1.50359	9.42292	0.00214289	exonic	DNAH10	.	nonsynonymous_SNV	DNAH10:NM_207437:exon72:c.C12298T:p.R4100C	0.0002	32
7	89884782	7:89884782:G:A	G	A	0.00017313	2888	ADD	4.97284	2.31856	9.42067	0.00214556	exonic	CFAP69	.	nonsynonymous_SNV	CFAP69:NM_001039706:exon2:c.G166A:p.E56K,CFAP69:NM_001160138:exon2:c.G166A:p.E56K,CFAP69:NM_001363438:exon2:c.G166A:p.E56K	0.0012	22.5
10	50530651	10:50530651:G:A	G	A	0.000334896	2986	ADD	4.56443	1.44167	9.41596	0.00215105	exonic	C10orf71	.	nonsynonymous_SNV	C10orf71:NM_001135196:exon3:c.G61A:p.V21M	0.0002	22.5
19	47124878	19:47124878:C:G	C	G	0.000334896	2986	ADD	5.10152	1.71323	9.41338	0.00215407	exonic	PTGIR	.	nonsynonymous_SNV	PTGIR:NM_000960:exon3:c.G820C:p.D274H	0.0048	26.6
12	53499350	12:53499350:A:G	A	G	0.000335008	2985	ADD	4.1509	2.03139	9.41057	0.0021574	exonic	SOAT2	.	nonsynonymous_SNV	SOAT2:NM_003578:exon4:c.A281G:p.Q94R	0.0041	3.399
17	26888562	17:26888562:C:T	C	T	0.000502344	2986	ADD	4.46024	1.25399	9.41006	0.00215799	exonic	PIGS	.	nonsynonymous_SNV	PIGS:NM_033198:exon6:c.G554A:p.R185H	0.0043	18.77
11	1858041	11:1858041:G:A	G	A	0.0015411	2920	ADD	3.02041	0.804796	9.40775	0.00216068	exonic	SYT8	.	nonsynonymous_SNV	SYT8:NM_001290332:exon7:c.G785A:p.R262Q,SYT8:NM_001290333:exon7:c.G782A:p.R261Q,SYT8:NM_001290334:exon7:c.G779A:p.R260Q,SYT8:NM_138567:exon7:c.G782A:p.R261Q	0.0044	20.3
12	108686443	12:108686443:G:A	G	A	0.00050184	2989	ADD	3.90831	1.43616	9.398	0.0021722	exonic	CMKLR1	.	synonymous_SNV	CMKLR1:NM_001142344:exon3:c.C297T:p.A99A,CMKLR1:NM_001142345:exon3:c.C297T:p.A99A,CMKLR1:NM_004072:exon3:c.C291T:p.A97A,CMKLR1:NM_001142343:exon4:c.C297T:p.A99A	0.004	0.58
11	70185325	11:70185325:C:T	C	T	0.118928	2985	ADD	0.697049	0.207144	9.39625	0.0021743	exonic	PPFIA1	.	synonymous_SNV	PPFIA1:NM_003626:exon14:c.C1620T:p.D540D,PPFIA1:NM_177423:exon14:c.C1620T:p.D540D	0.4752	0.596
1	17607180	1:17607180:G:T	G	T	0.00033456	2989	ADD	4.52636	1.4283	9.3919	0.00217947	exonic	PADI3	.	nonsynonymous_SNV	PADI3:NM_016233:exon15:c.G1650T:p.W550C	0.0004	28.1
19	1615796	19:1615796:G:A	G	A	0.00438301	2966	ADD	2.08802	0.577382	9.39123	0.00218027	exonic	TCF3	.	nonsynonymous_SNV	TCF3:NM_001136139:exon17:c.C1475T:p.A492V,TCF3:NM_001351778:exon17:c.C1472T:p.A491V,TCF3:NM_001351779:exon17:c.C1475T:p.A492V,TCF3:NM_003200:exon17:c.C1475T:p.A492V	0.4222	12.67
11	62520707	11:62520707:C:G	C	G	0.000334784	2987	ADD	4.55253	1.44123	9.3848	0.00218791	exonic	ZBTB3	.	nonsynonymous_SNV	ZBTB3:NM_001363108:exon2:c.G430C:p.E144Q,ZBTB3:NM_001363109:exon2:c.G430C:p.E144Q,ZBTB3:NM_001370809:exon2:c.G430C:p.E144Q,ZBTB3:NM_024784:exon2:c.G580C:p.E194Q	0.0001	22.8
16	21045369	16:21045369:A:G	A	G	0.0826043	2972	ADD	0.787465	0.231831	9.38452	0.00218827	exonic	DNAH3	.	synonymous_SNV	DNAH3:NM_001347886:exon36:c.T4986C:p.I1662I,DNAH3:NM_017539:exon36:c.T5124C:p.I1708I	0.2096	6.641
6	26033701	6:26033701:G:A	G	A	0.000334784	2987	ADD	4.49551	1.41729	9.37684	0.00219746	exonic	HIST1H2AB	.	synonymous_SNV	HIST1H2AB:NM_003513:exon1:c.C96T:p.H32H	0.0029	10.26
2	29160827	2:29160827:T:C	T	C	0.00117174	2987	ADD	3.11647	0.890683	9.37579	0.00219867	exonic	WDR43	.	synonymous_SNV	WDR43:NM_015131:exon14:c.T1587C:p.C529C	0.0271	12.81
6	32261755	6:32261755:T:C	T	C	0.000335683	2979	ADD	4.7183	1.5205	9.36889	0.00220699	exonic	TSBP1	.	nonsynonymous_SNV	TSBP1:NM_006781:exon23:c.A695G:p.Q232R,TSBP1:NM_001286475:exon24:c.A647G:p.Q216R,TSBP1:NM_001286474:exon26:c.A689G:p.Q230R	0.0006	7.087
7	11091385	7:11091385:A:G	A	G	0.000503525	2979	ADD	4.4029	1.22065	9.36697	0.00220933	exonic	PHF14	.	nonsynonymous_SNV	PHF14:NM_001007157:exon14:c.A2459G:p.K820R,PHF14:NM_014660:exon14:c.A2459G:p.K820R	0.0015	24.7
18	70417341	18:70417341:C:T	C	T	0.000670241	2984	ADD	4.34765	1.12957	9.36451	0.00221228	exonic	NETO1	.	synonymous_SNV	NETO1:NM_001201465:exon9:c.G1497A:p.P499P,NETO1:NM_001354017:exon9:c.G1497A:p.P499P,NETO1:NM_001354020:exon9:c.G1473A:p.P491P,NETO1:NM_138966:exon9:c.G1497A:p.P499P,NETO1:NM_001354018:exon10:c.G1071A:p.P357P	0.0012	7.573
19	47280575	19:47280575:G:A	G	A	0.000335683	2979	ADD	4.48508	1.41547	9.3591	0.00221881	exonic	SLC1A5	.	synonymous_SNV	SLC1A5:NM_001145145:exon5:c.C540T:p.G180G,SLC1A5:NM_001145144:exon6:c.C462T:p.G154G,SLC1A5:NM_005628:exon6:c.C1146T:p.G382G	0.0001	5.312
23	153716357	X:153716357:C:T	C	T	0.00033456	2989	ADD	4.62603	1.479	9.35835	0.00221973	exonic	SLC10A3	.	nonsynonymous_SNV	SLC10A3:NM_019848:exon2:c.G923A:p.R308H,SLC10A3:NM_001142392:exon3:c.G923A:p.R308H,SLC10A3:NM_001142391:exon4:c.G836A:p.R279H	0	NA
2	47606941	2:47606941:A:G	A	G	0.000335008	2985	ADD	4.4902	1.41901	9.35646	0.00222198	exonic	EPCAM	.	nonsynonymous_SNV	EPCAM:NM_002354:exon7:c.A691G:p.M231V	6.663e-05	21.1
10	102089682	10:102089682:G:A	G	A	0.000334672	2988	ADD	4.61415	1.47365	9.35629	0.00222224	exonic	PKD2L1	.	nonsynonymous_SNV	PKD2L1:NM_001253837:exon1:c.C16T:p.R6W,PKD2L1:NM_016112:exon1:c.C179T:p.T60M	0.0007	10.58
15	56208159	15:56208159:C:T	C	T	0.000340716	2935	ADD	4.08147	2.01433	9.35265	0.00222664	exonic	NEDD4	.	nonsynonymous_SNV	NEDD4:NM_001284338:exon1:c.G871A:p.G291R,NEDD4:NM_001284339:exon1:c.G871A:p.G291R,NEDD4:NM_001284340:exon1:c.G871A:p.G291R,NEDD4:NM_198400:exon1:c.G871A:p.G291R	0.0088	24.6
3	48626118	3:48626118:G:A	G	A	0.000669792	2986	ADD	4.35412	1.16062	9.35114	0.00222849	exonic	COL7A1	.	synonymous_SNV	COL7A1:NM_000094:exon19:c.C2544T:p.V848V	0.0012	6.88
20	55840900	20:55840900:C:T	C	T	0.000503187	2981	ADD	3.5993	1.2879	9.35019	0.00222962	exonic	BMP7	.	synonymous_SNV	BMP7:NM_001719:exon1:c.G279A:p.E93E	0.0922	13.03
7	4002413	7:4002413:C:T	C	T	0.000334672	2988	ADD	4.91689	1.62256	9.35	0.00222987	exonic	SDK1	.	synonymous_SNV	SDK1:NM_152744:exon9:c.C1359T:p.S453S	0.0011	6.106
22	46656831	22:46656831:G:A	G	A	0.00033456	2989	ADD	4.50042	1.42359	9.34908	0.00223095	exonic	PKDREJ	.	nonsynonymous_SNV	PKDREJ:NM_006071:exon1:c.C2389T:p.R797C	0.0014	5.229
11	57466083	11:57466083:G:A	G	A	0.000502176	2987	ADD	4.38647	1.21172	9.34907	0.002231	exonic	ZDHHC5	.	nonsynonymous_SNV	ZDHHC5:NM_015457:exon11:c.G1175A:p.R392H	0.0007	23.1
19	39907025	19:39907025:G:T	G	T	0.000335233	2983	ADD	4.59853	1.46798	9.3476	0.00223275	exonic	PLEKHG2	.	nonsynonymous_SNV	PLEKHG2:NM_001351693:exon5:c.G340T:p.G114W,PLEKHG2:NM_001351694:exon5:c.G517T:p.G173W,PLEKHG2:NM_022835:exon5:c.G517T:p.G173W	0.0003	26
5	45262688	5:45262688:C:T	C	T	0.00033456	2989	ADD	4.79366	1.56157	9.34709	0.00223342	exonic	HCN1	.	nonsynonymous_SNV	HCN1:NM_021072:exon8:c.G2008A:p.A670T	6.683e-05	17.74
20	55982695	20:55982695:G:A	G	A	0.000506757	2960	ADD	3.59868	1.28782	9.34674	0.00223383	exonic	RBM38	.	synonymous_SNV	RBM38:NM_017495:exon4:c.G513A:p.E171E,RBM38:NM_001291780:exon5:c.G609A:p.E203E	0.0981	8.183
1	28800111	1:28800111:C:T	C	T	0.00033456	2989	ADD	4.60671	1.47132	9.34506	0.00223589	exonic	PHACTR4	.	nonsynonymous_SNV	PHACTR4:NM_023923:exon6:c.C899T:p.P300L,PHACTR4:NM_001048183:exon7:c.C869T:p.P290L,PHACTR4:NM_001350158:exon8:c.C893T:p.P298L,PHACTR4:NM_001350160:exon8:c.C869T:p.P290L,PHACTR4:NM_001350161:exon8:c.C821T:p.P274L,PHACTR4:NM_001350159:exon9:c.C893T:p.P298L	0.0003	24.5
12	6204737	12:6204737:C:T	C	T	0.00133824	2989	ADD	3.10894	0.853585	9.34298	0.00223841	exonic	VWF	.	synonymous_SNV	VWF:NM_000552:exon6:c.G546A:p.S182S	0.003	8.641
19	39399371	19:39399371:G:A	G	A	0.000334896	2986	ADD	4.59755	1.46798	9.34167	0.00224001	exonic	NFKBIB	.	nonsynonymous_SNV	NFKBIB:NM_001243116:exon6:c.G712A:p.D238N,NFKBIB:NM_001369700:exon6:c.G694A:p.D232N,NFKBIB:NM_002503:exon6:c.G970A:p.D324N	0.0004	26.1
14	92336674	14:92336674:C:T	C	T	0.000334672	2988	ADD	4.62498	1.48221	9.33416	0.00224921	exonic	FBLN5	.	nonsynonymous_SNV	FBLN5:NM_006329:exon11:c.G1241A:p.R414Q	0.0006	25.4
17	4455763	17:4455763:T:C	T	C	0.000503018	2982	ADD	4.43527	1.25188	9.33414	0.00224926	exonic	MYBBP1A	.	synonymous_SNV	MYBBP1A:NM_001105538:exon6:c.A720G:p.S240S,MYBBP1A:NM_014520:exon6:c.A720G:p.S240S	0.0059	4.238
23	102471167	X:102471167:C:T	C	T	0.000334672	2988	ADD	4.49583	1.42398	9.33199	0.0022519	exonic	BEX4	.	nonsynonymous_SNV	BEX4:NM_001127688:exon2:c.C86T:p.T29M,BEX4:NM_001080425:exon3:c.C86T:p.T29M	0.0004	NA
4	40245150	4:40245150:T:C	T	C	0.00284376	2989	ADD	2.47494	0.680516	9.3262	0.00225902	exonic	RHOH	.	synonymous_SNV	RHOH:NM_001278363:exon3:c.T144C:p.D48D,RHOH:NM_001278367:exon3:c.T144C:p.D48D,RHOH:NM_001278368:exon3:c.T144C:p.D48D,RHOH:NM_001278369:exon3:c.T144C:p.D48D,RHOH:NM_004310:exon3:c.T144C:p.D48D,RHOH:NM_001278359:exon4:c.T144C:p.D48D,RHOH:NM_001278360:exon4:c.T144C:p.D48D,RHOH:NM_001278361:exon4:c.T144C:p.D48D,RHOH:NM_001278362:exon4:c.T144C:p.D48D,RHOH:NM_001278365:exon4:c.T144C:p.D48D,RHOH:NM_0012…	0.0026	9.774
1	16456876	1:16456876:T:C	T	C	0.00033456	2989	ADD	4.60982	1.47623	9.32567	0.00225964	exonic	EPHA2	.	synonymous_SNV	EPHA2:NM_001329090:exon14:c.A2352G:p.T784T,EPHA2:NM_004431:exon15:c.A2514G:p.T838T	0.0603	10.36
1	16459836	1:16459836:A:G	A	G	0.00033456	2989	ADD	4.60982	1.47623	9.32567	0.00225964	exonic	EPHA2	.	nonsynonymous_SNV	EPHA2:NM_001329090:exon10:c.T1730C:p.M577T,EPHA2:NM_004431:exon11:c.T1892C:p.M631T	0.0612	10.93
1	23418068	1:23418068:G:A	G	A	0.00033456	2989	ADD	4.60982	1.47623	9.32567	0.00225964	exonic	LUZP1	.	nonsynonymous_SNV	LUZP1:NM_001142546:exon3:c.C2687T:p.A896V,LUZP1:NM_033631:exon4:c.C2687T:p.A896V	0.047	14.04
1	16461601	1:16461601:C:A	C	A	0.000335121	2984	ADD	4.60972	1.47623	9.32508	0.00226037	exonic	EPHA2	.	synonymous_SNV	EPHA2:NM_001329090:exon6:c.G1350T:p.L450L,EPHA2:NM_004431:exon7:c.G1512T:p.L504L	0.0638	12.98
2	233715061	2:233715061:G:A	G	A	0.00150804	2984	ADD	3.09215	0.837572	9.32308	0.00226287	exonic	GIGYF2	.	synonymous_SNV	GIGYF2:NM_001103148:exon27:c.G3756A:p.V1252V,GIGYF2:NM_001103146:exon28:c.G3774A:p.V1258V,GIGYF2:NM_001103147:exon30:c.G3837A:p.V1279V,GIGYF2:NM_015575:exon30:c.G3774A:p.V1258V	0.0014	9.086
19	17014386	19:17014386:G:A	G	A	0.000502176	2987	ADD	4.38001	1.21582	9.32237	0.00226371	exonic	CPAMD8	.	synonymous_SNV	CPAMD8:NM_015692:exon34:c.C4455T:p.G1485G	0.0144	13.15
16	3706166	16:3706166:G:A	G	A	0.000334672	2988	ADD	4.51274	1.43277	9.3216	0.0022647	exonic	DNASE1	.	synonymous_SNV	DNASE1:NM_005223:exon4:c.G300A:p.E100E,DNASE1:NM_001351825:exon5:c.G300A:p.E100E	0.0033	9.178
16	78466583	16:78466583:C:G	C	G	0.000502344	2986	ADD	4.37408	1.21054	9.32076	0.00226574	exonic	WWOX	.	nonsynonymous_SNV	WWOX:NM_001291997:exon7:c.C651G:p.N217K,WWOX:NM_016373:exon8:c.C990G:p.N330K	0.0003	19.23
19	57085769	19:57085769:G:C	G	C	0.358758	2963	ADD	0.527043	0.164988	9.31856	0.00226845	exonic	ZNF470	.	nonsynonymous_SNV	ZNF470:NM_001001668:exon4:c.G67C:p.V23L	0.6294	9.058
1	32672932	1:32672932:G:A	G	A	0.0552394	2987	ADD	0.903808	0.262476	9.31204	0.00227651	exonic	IQCC	.	nonsynonymous_SNV	IQCC:NM_001160042:exon5:c.G890A:p.C297Y,IQCC:NM_018134:exon5:c.G650A:p.C217Y	0.2933	11.77
11	61730555	11:61730555:G:A	G	A	0.000334784	2987	ADD	4.54748	1.45073	9.30957	0.00227961	exonic	BEST1	.	synonymous_SNV	BEST1:NM_001363591:exon8:c.G1611A:p.S537S,BEST1:NM_001363593:exon8:c.G957A:p.S319S,BEST1:NM_001139443:exon9:c.G1749A:p.S583S	0.0076	0.874
12	52963730	12:52963730:G:A	G	A	0.000334672	2988	ADD	4.56763	1.45959	9.30884	0.0022805	exonic	KRT74	.	synonymous_SNV	KRT74:NM_175053:exon6:c.C1047T:p.D349D	0.0002	0.097
1	244724277	1:244724277:C:T	C	T	0.000502008	2988	ADD	4.44629	1.25899	9.30854	0.00228087	exonic	CATSPERE	.	nonsynonymous_SNV	CATSPERE:NM_001242340:exon7:c.C884T:p.T295I,CATSPERE:NM_001130957:exon10:c.C1337T:p.T446I,CATSPERE:NM_173807:exon10:c.C1337T:p.T446I	0.1159	7.793
19	758269	19:758269:C:T	C	T	0.00033456	2989	ADD	4.54576	1.44968	9.30624	0.00228376	exonic	MISP	.	synonymous_SNV	MISP:NM_173481:exon2:c.C1323T:p.F441F	0.0006	0.304
19	39103313	19:39103313:C:T	C	T	0.000334896	2986	ADD	4.46662	1.41542	9.30407	0.00228644	exonic	MAP4K1	.	synonymous_SNV	MAP4K1:NM_001042600:exon9:c.G603A:p.L201L,MAP4K1:NM_007181:exon9:c.G603A:p.L201L	1.793e-05	13.67
11	10821799	11:10821799:A:T	A	T	0.000335683	2979	ADD	5.23002	1.81241	9.30276	0.00228807	exonic	EIF4G2	.	nonsynonymous_SNV	EIF4G2:NM_001042559:exon17:c.T1843A:p.S615T,EIF4G2:NM_001172705:exon18:c.T1957A:p.S653T,EIF4G2:NM_001418:exon18:c.T1957A:p.S653T	0.002	20.8
8	106815396	8:106815396:A:T	A	T	0.000502176	2987	ADD	4.33903	1.19603	9.30216	0.00228886	exonic	ZFPM2	.	nonsynonymous_SNV	ZFPM2:NM_001362836:exon7:c.A2927T:p.K976I,ZFPM2:NM_001362837:exon8:c.A2690T:p.K897I,ZFPM2:NM_012082:exon8:c.A3086T:p.K1029I	0.0005	29.1
16	4731602	16:4731602:C:G	C	G	0.000335233	2983	ADD	4.46769	1.41634	9.30092	0.00229039	exonic	MGRN1	.	nonsynonymous_SNV	MGRN1:NM_001142289:exon12:c.C1117G:p.L373V,MGRN1:NM_001142291:exon12:c.C1117G:p.L373V,MGRN1:NM_001142290:exon13:c.C1183G:p.L395V,MGRN1:NM_015246:exon13:c.C1183G:p.L395V	0.0002	26.8
4	17513582	4:17513582:G:A	G	A	0.00991304	2875	ADD	1.57478	0.439724	9.30003	0.0022915	exonic	QDPR	.	synonymous_SNV	QDPR:NM_000320:exon1:c.C96T:p.A32A,QDPR:NM_001306140:exon1:c.C96T:p.A32A	0.027	14.77
8	17169136	8:17169136:C:G	C	G	0.000335796	2978	ADD	4.4752	1.42039	9.29411	0.0022989	exonic	MTMR7	.	nonsynonymous_SNV	MTMR7:NM_004686:exon9:c.G985C:p.E329Q	6.661e-05	23
2	1680785	2:1680785:G:A	G	A	0.000334784	2987	ADD	4.86036	1.60431	9.2909	0.00230293	exonic	PXDN	.	synonymous_SNV	PXDN:NM_012293:exon8:c.C762T:p.D254D	0.0002	6.886
7	45662327	7:45662327:C:T	C	T	0.000337724	2961	ADD	4.71678	1.53288	9.29078	0.00230309	exonic	ADCY1	.	synonymous_SNV	ADCY1:NM_021116:exon4:c.C1005T:p.F335F,ADCY1:NM_001281768:exon5:c.C330T:p.F110F	0.0012	10.58
16	30536737	16:30536737:G:A	G	A	0.000674309	2966	ADD	4.03215	1.26092	9.28733	0.00230744	exonic	ZNF768	.	nonsynonymous_SNV	ZNF768:NM_024671:exon2:c.C724T:p.L242F	0.0012	19.64
1	16770133	1:16770133:G:A	G	A	0.000335233	2983	ADD	4.46231	1.41613	9.28705	0.00230781	exonic	NECAP2	.	synonymous_SNV	NECAP2:NM_001145277:exon2:c.G99A:p.A33A,NECAP2:NM_001145278:exon2:c.G21A:p.A7A,NECAP2:NM_018090:exon2:c.G99A:p.A33A	0.0002	10.06
20	60485640	20:60485640:G:A	G	A	0.000335233	2983	ADD	4.46184	1.41761	9.2781	0.0023191	exonic	CDH4	.	nonsynonymous_SNV	CDH4:NM_001252338:exon8:c.G1240A:p.E414K,CDH4:NM_001252339:exon8:c.G1129A:p.E377K,CDH4:NM_001794:exon9:c.G1351A:p.E451K	0.001	25.4
12	62749172	12:62749172:G:A	G	A	0.000345543	2894	ADD	4.46106	1.41619	9.27657	0.00232103	exonic	USP15	.	synonymous_SNV	USP15:NM_001351160:exon6:c.G84A:p.S28S,USP15:NM_006313:exon7:c.G744A:p.S248S,USP15:NM_001252078:exon8:c.G831A:p.S277S,USP15:NM_001351159:exon9:c.G468A:p.S156S	0.0003	11.16
15	82335975	15:82335975:G:C	G	C	0.000335121	2984	ADD	4.45696	1.41537	9.27594	0.00232183	exonic	MEX3B	.	synonymous_SNV	MEX3B:NM_032246:exon2:c.C1236G:p.P412P	0.0004	0.864
14	58814423	14:58814423:C:G	C	G	0.00033557	2980	ADD	4.45938	1.41691	9.27259	0.00232611	exonic	ARID4A	.	nonsynonymous_SNV	ARID4A:NM_002892:exon15:c.C1231G:p.H411D,ARID4A:NM_023000:exon15:c.C1231G:p.H411D,ARID4A:NM_023001:exon15:c.C1231G:p.H411D	0.0108	26
16	89347358	16:89347358:A:G	A	G	0.000335909	2977	ADD	4.4887	1.42975	9.27196	0.00232686	exonic	ANKRD11	.	synonymous_SNV	ANKRD11:NM_001256183:exon9:c.T5592C:p.A1864A,ANKRD11:NM_013275:exon9:c.T5592C:p.A1864A,ANKRD11:NM_001256182:exon10:c.T5592C:p.A1864A	5.838e-05	0.128
3	50340374	3:50340374:A:G	A	G	0.000334672	2988	ADD	4.45851	1.41686	9.27134	0.00232766	exonic	HYAL1	.	nonsynonymous_SNV	HYAL1:NM_033159:exon2:c.T14C:p.L5P,HYAL1:NM_153282:exon2:c.T14C:p.L5P,HYAL1:NM_153281:exon4:c.T14C:p.L5P	0.0001	23.4
3	48336263	3:48336263:G:T	G	T	0.000335233	2983	ADD	4.45836	1.41687	9.27026	0.00232906	exonic	NME6	.	nonsynonymous_SNV	NME6:NM_001308435:exon4:c.C224A:p.A75E,NME6:NM_001308430:exon5:c.C409A:p.Q137K,NME6:NM_001308431:exon5:c.C385A:p.Q129K,NME6:NM_001308433:exon5:c.C385A:p.Q129K,NME6:NM_001308434:exon5:c.C290A:p.A97E,NME6:NM_001308426:exon6:c.C425A:p.A142E,NME6:NM_001308427:exon6:c.C425A:p.A142E,NME6:NM_001308428:exon6:c.C425A:p.A142E,NME6:NM_005793:exon6:c.C449A:p.A150E	0.0013	22.6
19	38655272	19:38655272:G:A	G	A	0.000334896	2986	ADD	4.49075	1.43235	9.26301	0.0023383	exonic	SIPA1L3	.	nonsynonymous_SNV	SIPA1L3:NM_015073:exon15:c.G3934A:p.D1312N	0.0002	26.8
8	101733761	8:101733761:G:A	G	A	0.000502176	2987	ADD	4.35678	1.21212	9.2587	0.0023438	exonic	PABPC1	.	synonymous_SNV	PABPC1:NM_002568:exon1:c.C51T:p.D17D	0.0004	13.46
7	17375326	7:17375326:G:A	G	A	0.00122079	2867	ADD	3.08175	0.856994	9.25345	0.00235055	exonic	AHR	.	nonsynonymous_SNV	AHR:NM_001621:exon9:c.G1076A:p.R359Q	0.0012	23.6
13	111532288	13:111532288:G:A	G	A	0.0222557	2988	ADD	1.30607	0.371848	9.25326	0.00235077	exonic	ANKRD10	.	nonsynonymous_SNV	ANKRD10:NM_017664:exon6:c.C959T:p.P320L	0.1773	6.082
9	130864368	9:130864368:G:C	G	C	0.000334784	2987	ADD	4.62564	1.49522	9.2516	0.00235288	exonic	SLC25A25	.	synonymous_SNV	SLC25A25:NM_001265614:exon4:c.G444C:p.T148T,SLC25A25:NM_001330988:exon4:c.G486C:p.T162T	0.0001	21.8
1	158651394	1:158651394:C:T	C	T	0.00033456	2989	ADD	4.7841	1.57283	9.24843	0.00235695	exonic	SPTA1	.	nonsynonymous_SNV	SPTA1:NM_003126:exon4:c.G454A:p.D152N	0.1182	0.036
1	158647570	1:158647570:A:G	A	G	0.000335458	2981	ADD	4.78377	1.57284	9.24674	0.00235917	exonic	SPTA1	.	synonymous_SNV	SPTA1:NM_003126:exon7:c.T867C:p.S289S	0.1181	1.086
19	1496417	19:1496417:G:A	G	A	0.000341064	2932	ADD	4.46758	1.42456	9.24029	0.0023675	exonic	REEP6	.	nonsynonymous_SNV	REEP6:NM_001329556:exon4:c.G482A:p.R161Q,REEP6:NM_138393:exon4:c.G482A:p.R161Q	0.0001	8.959
17	19575238	17:19575238:T:C	T	C	0.000334896	2986	ADD	4.50477	1.44191	9.2401	0.00236772	exonic	ALDH3A2	.	nonsynonymous_SNV	ALDH3A2:NM_000382:exon9:c.T1412C:p.F471S,ALDH3A2:NM_001031806:exon9:c.T1412C:p.F471S,ALDH3A2:NM_001369136:exon10:c.T1412C:p.F471S,ALDH3A2:NM_001369137:exon10:c.T1412C:p.F471S,ALDH3A2:NM_001369138:exon10:c.T1412C:p.F471S,ALDH3A2:NM_001369139:exon10:c.T1412C:p.F471S,ALDH3A2:NM_001369148:exon11:c.T833C:p.F278S	0.0004	23.6
14	71206767	14:71206767:G:A	G	A	0.00033456	2989	ADD	4.44356	1.4153	9.2378	0.00237072	exonic	MAP3K9	.	nonsynonymous_SNV	MAP3K9:NM_001284232:exon6:c.C764T:p.A255V,MAP3K9:NM_001284230:exon7:c.C1682T:p.A561V,MAP3K9:NM_001284231:exon7:c.C893T:p.A298V,MAP3K9:NM_033141:exon7:c.C1682T:p.A561V	1.79e-05	30
4	8398833	4:8398833:C:T	C	T	0.000502008	2988	ADD	4.35805	1.21521	9.23687	0.00237192	exonic	ACOX3	.	nonsynonymous_SNV	ACOX3:NM_001101667:exon9:c.G887A:p.R296H,ACOX3:NM_003501:exon9:c.G887A:p.R296H	0.0002	23.3
14	20850411	14:20850411:G:A	G	A	0.000335008	2985	ADD	4.87412	1.62184	9.23605	0.00237296	exonic	TEP1	.	synonymous_SNV	TEP1:NM_001319035:exon27:c.C3921T:p.A1307A,TEP1:NM_007110:exon29:c.C4245T:p.A1415A	0.0001	0.957
17	29652884	17:29652884:T:C	T	C	0.000502849	2983	ADD	4.36294	1.22405	9.22865	0.00238259	exonic	NF1	.	synonymous_SNV	NF1:NM_000267:exon36:c.T4819C:p.L1607L,NF1:NM_001042492:exon37:c.T4882C:p.L1628L	0.0742	9.762
3	98518377	3:98518377:C:T	C	T	0.00100435	2987	ADD	3.10659	0.917	9.22827	0.00238309	exonic	DCBLD2	.	nonsynonymous_SNV	DCBLD2:NM_080927:exon16:c.G2167A:p.D723N	0.0896	22.9
15	57731673	15:57731673:AAAG:A	AAAG	A	0.000502008	2988	ADD	4.33682	1.21032	9.22637	0.00238556	exonic	CGNL1	.	nonframeshift_deletion	CGNL1:NM_032866:exon2:c.1477_1479del:p.K493del,CGNL1:NM_001252335:exon3:c.1477_1479del:p.K493del	0.0004	19.78
21	46945812	21:46945812:C:T	C	T	0.000334896	2986	ADD	4.43584	1.41529	9.21533	0.00239999	exonic	SLC19A1	.	synonymous_SNV	SLC19A1:NM_001205207:exon4:c.G1092A:p.T364T,SLC19A1:NM_001205206:exon5:c.G1212A:p.T404T,SLC19A1:NM_001352510:exon5:c.G858A:p.T286T,SLC19A1:NM_001352511:exon5:c.G1212A:p.T404T,SLC19A1:NM_001352512:exon5:c.G1212A:p.T404T,SLC19A1:NM_194255:exon5:c.G1212A:p.T404T	0.0012	0.012
10	70405439	10:70405439:G:T	G	T	0.000334896	2986	ADD	4.43823	1.41672	9.21221	0.00240409	exonic	TET1	.	nonsynonymous_SNV	TET1:NM_030625:exon4:c.G2953T:p.A985S	0.0748	12.33
13	32348792	13:32348792:G:A	G	A	0.000336022	2976	ADD	4.55304	1.46799	9.21215	0.00240414	exonic	RXFP2	.	nonsynonymous_SNV	RXFP2:NM_001166058:exon6:c.G533A:p.R178K,RXFP2:NM_130806:exon6:c.G533A:p.R178K	8.985e-06	17.64
10	70404981	10:70404981:G:A	G	A	0.000335121	2984	ADD	4.43821	1.41672	9.2121	0.0024042	exonic	TET1	.	nonsynonymous_SNV	TET1:NM_030625:exon4:c.G2495A:p.C832Y	0.0752	22.6
14	50616878	14:50616878:G:A	G	A	0.655946	2985	ADD	0.590671	0.19359	9.21102	0.00240564	exonic	SOS2	.	synonymous_SNV	SOS2:NM_006939:exon14:c.C2232T:p.N744N	0.7318	7.859
10	73053556	10:73053556:G:A	G	A	0.000335345	2982	ADD	4.43784	1.41691	9.21038	0.00240647	exonic	UNC5B	.	nonsynonymous_SNV	UNC5B:NM_001244889:exon12:c.G2008A:p.V670M,UNC5B:NM_170744:exon13:c.G2041A:p.V681M	0.0463	25.8
10	115947590	10:115947590:G:A	G	A	0.000335121	2984	ADD	4.51164	1.44949	9.21038	0.00240647	UTR5	TDRD1	NM_198795:c.-1G>A\x3bNM_001365891:c.-1G>A	.	.	0.0013	0.697
14	64935537	14:64935537:C:T	C	T	0.000338409	2955	ADD	4.45629	1.4246	9.20929	0.00240791	exonic	AKAP5	.	nonsynonymous_SNV	AKAP5:NM_004857:exon2:c.C425T:p.S142F	8.97e-06	25.1
12	107395106	12:107395106:A:G	A	G	0.620147	2988	ADD	0.571885	0.185944	9.20812	0.00240946	exonic	CRY1	.	synonymous_SNV	CRY1:NM_004075:exon5:c.T636C:p.G212G	0.975	7.641
4	952049	4:952049:CCT:C	CCT	C	0.0003367	2970	ADD	4.44436	1.42001	9.20757	0.00241018	exonic	TMEM175	.	frameshift_deletion	TMEM175:NM_001297424:exon9:c.1035_1036del:p.A347Qfs*120,TMEM175:NM_001297425:exon9:c.1035_1036del:p.A347Qfs*120,TMEM175:NM_001297428:exon9:c.933_934del:p.A313Qfs*120,TMEM175:NM_001297423:exon11:c.1035_1036del:p.A347Qfs*120,TMEM175:NM_001297427:exon11:c.933_934del:p.A313Qfs*120,TMEM175:NM_032326:exon11:c.1281_1282del:p.A429Qfs*120,TMEM175:NM_001297426:exon12:c.933_934del:p.A313Qfs*120	0.002	25.1
4	8613867	4:8613867:G:A	G	A	0.00318151	2986	ADD	2.34738	0.633017	9.20718	0.00241068	exonic	CPZ	.	synonymous_SNV	CPZ:NM_003652:exon7:c.G1308A:p.A436A,CPZ:NM_001014447:exon8:c.G1341A:p.A447A,CPZ:NM_001014448:exon8:c.G930A:p.A310A	0.2889	7.364
20	49493048	20:49493048:C:T	C	T	0.000337496	2963	ADD	4.48229	1.43637	9.20607	0.00241213	exonic	BCAS4	.	nonsynonymous_SNV	BCAS4:NM_001010974:exon4:c.C380T:p.T127M,BCAS4:NM_198799:exon5:c.C515T:p.T172M	0.001	0.199
12	124829468	12:124829468:C:T	C	T	0.000335008	2985	ADD	4.55592	1.47051	9.2056	0.00241274	exonic	NCOR2	.	synonymous_SNV	NCOR2:NM_001077261:exon33:c.G4359A:p.A1453A,NCOR2:NM_001206654:exon33:c.G4359A:p.A1453A,NCOR2:NM_006312:exon34:c.G4389A:p.A1463A	0.0068	0.553
2	37543544	2:37543544:T:C	T	C	0.0470372	2987	ADD	0.962883	0.282363	9.20465	0.00241402	exonic	PRKD3	.	nonsynonymous_SNV	PRKD3:NM_005813:exon1:c.A124G:p.N42D	0.0526	20.7
1	41503194	1:41503194:C:A	C	A	0.00033456	2989	ADD	4.51811	1.45356	9.20431	0.00241446	exonic	SCMH1	.	synonymous_SNV	SCMH1:NM_001172222:exon9:c.G1014T:p.G338G,SCMH1:NM_001172220:exon12:c.G1305T:p.G435G,SCMH1:NM_001172221:exon12:c.G1305T:p.G435G,SCMH1:NM_001350668:exon12:c.G984T:p.G328G,SCMH1:NM_001031694:exon13:c.G1488T:p.G496G,SCMH1:NM_001172219:exon13:c.G1518T:p.G506G,SCMH1:NM_012236:exon13:c.G1347T:p.G449G,SCMH1:NM_001172218:exon14:c.G1305T:p.G435G,SCMH1:NM_001350667:exon14:c.G1215T:p.G405G	0.0012	10.09
11	57256393	11:57256393:C:A	C	A	0.000334896	2986	ADD	4.50628	1.44846	9.20216	0.0024173	exonic	SLC43A1	.	nonsynonymous_SNV	SLC43A1:NM_001198810:exon13:c.G1405T:p.A469S,SLC43A1:NM_003627:exon13:c.G1405T:p.A469S	0.0009	26.9
19	4538161	19:4538161:G:A	G	A	0.00033456	2989	ADD	4.43434	1.41708	9.20072	0.00241919	exonic	LRG1	.	nonsynonymous_SNV	LRG1:NM_052972:exon2:c.C835T:p.L279F	0.0005	22.4
17	48597114	17:48597114:C:T	C	T	0.148872	2969	ADD	-0.886415	0.307401	9.2002	0.00241991	exonic	MYCBPAP	.	synonymous_SNV	MYCBPAP:NM_001366294:exon7:c.C927T:p.H309H,MYCBPAP:NM_032133:exon7:c.C882T:p.H294H	0.348	2.492
19	50985427	19:50985427:G:A	G	A	0.000502176	2987	ADD	4.33865	1.21756	9.19964	0.00242064	exonic	EMC10	.	nonsynonymous_SNV	EMC10:NM_206538:exon7:c.G700A:p.V234I	0.0016	22.8
19	5262979	19:5262979:G:C	G	C	0.00619351	2987	ADD	1.99541	0.548607	9.19844	0.0024222	exonic	PTPRS	.	synonymous_SNV	PTPRS:NM_002850:exon6:c.C573G:p.T191T	0.0122	11.43
7	142566408	7:142566408:C:T	C	T	0.000335008	2985	ADD	4.74078	1.55954	9.19493	0.00242689	exonic	EPHB6	.	nonsynonymous_SNV	EPHB6:NM_001280795:exon11:c.C1321T:p.R441W,EPHB6:NM_001280794:exon14:c.C1321T:p.R441W,EPHB6:NM_004445:exon15:c.C2197T:p.R733W	0.0003	29.2
11	118922603	11:118922603:C:T	C	T	0.00117135	2988	ADD	3.09686	0.888551	9.19216	0.00243052	exonic	HYOU1	.	synonymous_SNV	HYOU1:NM_001130991:exon12:c.G1266A:p.Q422Q,HYOU1:NM_006389:exon12:c.G1266A:p.Q422Q	0.0456	12.13
18	77659581	18:77659581:G:C	G	C	0.00033557	2980	ADD	4.44407	1.42265	9.18896	0.00243478	exonic	KCNG2	.	nonsynonymous_SNV	KCNG2:NM_012283:exon2:c.G1166C:p.S389T	5.6e-05	23.7
5	5462568	5:5462568:A:G	A	G	0.000502008	2988	ADD	4.41062	1.30554	9.1889	0.00243489	exonic	ICE1	.	nonsynonymous_SNV	ICE1:NM_015325:exon13:c.A3121G:p.T1041A	6.662e-05	0.004
22	30660199	22:30660199:G:A	G	A	0.000334784	2987	ADD	4.42573	1.4151	9.18691	0.00243753	exonic	OSM	.	synonymous_SNV	OSM:NM_001319108:exon3:c.C369T:p.L123L,OSM:NM_020530:exon3:c.C432T:p.L144L	0.0149	0.218
2	39487913	2:39487913:T:C	T	C	0.000345901	2891	ADD	4.43615	1.41887	9.18521	0.00243978	exonic	MAP4K3	.	nonsynonymous_SNV	MAP4K3:NM_001270425:exon28:c.A2079G:p.I693M,MAP4K3:NM_003618:exon29:c.A2142G:p.I714M	0.0003	23.5
23	122319733	X:122319733:T:C	T	C	0.00267738	2988	ADD	2.49456	0.701503	9.18007	0.00244664	exonic	GRIA3	.	synonymous_SNV	GRIA3:NM_000828:exon2:c.T159C:p.F53F,GRIA3:NM_001256743:exon2:c.T159C:p.F53F,GRIA3:NM_007325:exon2:c.T159C:p.F53F	0.0049	NA
4	106888468	4:106888468:C:T	C	T	0.000670017	2985	ADD	4.3271	1.1486	9.16364	0.00246871	exonic	NPNT	.	nonsynonymous_SNV	NPNT:NM_001184692:exon10:c.C1382T:p.T461M,NPNT:NM_001033047:exon11:c.C1469T:p.T490M,NPNT:NM_001184693:exon11:c.C1472T:p.T491M,NPNT:NM_001184690:exon12:c.C1520T:p.T507M,NPNT:NM_001184691:exon12:c.C1559T:p.T520M	0.002	22.8
1	43908286	1:43908286:A:G	A	G	0.000507786	2954	ADD	4.34491	1.2334	9.16236	0.00247042	exonic	SZT2	.	synonymous_SNV	SZT2:NM_015284:exon57:c.A7977G:p.E2659E,SZT2:NM_001365999:exon58:c.A8148G:p.E2716E	0.0006	10.03
2	242814702	2:242814702:C:T	C	T	0.000335121	2984	ADD	3.96648	1.96919	9.15586	0.00247925	exonic	RTP5	.	nonsynonymous_SNV	RTP5:NM_173821:exon2:c.C995T:p.S332L	0.0209	0.108
17	3494286	17:3494286:G:A	G	A	0.000334896	2986	ADD	4.58192	1.49091	9.15383	0.00248199	exonic	TRPV1	.	synonymous_SNV	TRPV1:NM_080706:exon3:c.C576T:p.N192N,TRPV1:NM_018727:exon4:c.C576T:p.N192N,TRPV1:NM_080705:exon4:c.C576T:p.N192N,TRPV1:NM_080704:exon5:c.C576T:p.N192N	0.0053	10.32
19	49644685	19:49644685:C:A	C	A	0.00134003	2985	ADD	3.1161	0.879468	9.15192	0.00248456	exonic	PPFIA3	.	nonsynonymous_SNV	PPFIA3:NM_003660:exon19:c.C2377A:p.P793T	0.0015	23.6
17	65074534	17:65074534:G:A	G	A	0.00150703	2986	ADD	3.01015	0.833033	9.15185	0.00248468	exonic	HELZ	.	nonsynonymous_SNV	HELZ:NM_001330447:exon33:c.C5666T:p.A1889V,HELZ:NM_014877:exon33:c.C5663T:p.A1888V	0.0047	11.7
16	4702809	16:4702809:C:T	C	T	0.000338639	2953	ADD	4.53377	1.46859	9.14993	0.00248725	exonic	MGRN1	.	synonymous_SNV	MGRN1:NM_001142289:exon4:c.C427T:p.L143L,MGRN1:NM_001142290:exon4:c.C427T:p.L143L,MGRN1:NM_001142291:exon4:c.C427T:p.L143L,MGRN1:NM_015246:exon4:c.C427T:p.L143L	8.399e-05	11.21
12	57113815	12:57113815:G:A	G	A	0.000334896	2986	ADD	4.41276	1.41533	9.14786	0.00249006	exonic	NACA	.	nonsynonymous_SNV	NACA:NM_001113203:exon3:c.C1499T:p.T500I,NACA:NM_001365896:exon3:c.C1499T:p.T500I	0.0001	21.7
4	147788728	4:147788728:G:A	G	A	0.0458515	2977	ADD	-1.90808	0.764843	9.14536	0.0024935	exonic	TTC29	.	synonymous_SNV	TTC29:NM_001317806:exon8:c.C807T:p.D269D,TTC29:NM_031956:exon8:c.C807T:p.D269D,TTC29:NM_001300761:exon9:c.C885T:p.D295D	0.1861	5.617
10	97442435	10:97442435:C:T	C	T	0.000502344	2986	ADD	4.46109	1.29002	9.14311	0.00249655	exonic	TCTN3	.	synonymous_SNV	TCTN3:NM_001143973:exon8:c.G981A:p.R327R,TCTN3:NM_015631:exon12:c.G1425A:p.R475R	0.0066	5.588
17	56352920	17:56352920:C:T	C	T	0.00066912	2989	ADD	4.3103	1.17421	9.1416	0.00249862	exonic	MPO	.	nonsynonymous_SNV	MPO:NM_000250:exon8:c.G1348A:p.V450M	0.0003	22.1
5	176396651	5:176396651:C:T	C	T	0.00133958	2986	ADD	3.01947	0.82942	9.13865	0.00250265	exonic	UIMC1	.	synonymous_SNV	UIMC1:NM_001199298:exon5:c.G414A:p.P138P,UIMC1:NM_001317961:exon5:c.G414A:p.P138P,UIMC1:NM_016290:exon5:c.G414A:p.P138P,UIMC1:NM_001199297:exon6:c.G414A:p.P138P	0.0014	0.369
9	127549470	9:127549470:G:A	G	A	0.000335683	2979	ADD	4.49172	1.45225	9.13537	0.00250715	exonic	OLFML2A	.	nonsynonymous_SNV	OLFML2A:NM_182487:exon2:c.G307A:p.E103K	0.0003	26.3
17	48668934	17:48668934:C:T	C	T	0.00033456	2989	ADD	4.16493	2.06485	9.12916	0.00251565	exonic	CACNA1G	.	synonymous_SNV	CACNA1G:NM_001256324:exon11:c.C2592T:p.N864N,CACNA1G:NM_001256325:exon11:c.C2592T:p.N864N,CACNA1G:NM_001256326:exon11:c.C2592T:p.N864N,CACNA1G:NM_001256327:exon11:c.C2592T:p.N864N,CACNA1G:NM_001256328:exon11:c.C2592T:p.N864N,CACNA1G:NM_001256329:exon11:c.C2592T:p.N864N,CACNA1G:NM_001256330:exon11:c.C2592T:p.N864N,CACNA1G:NM_001256331:exon11:c.C2592T:p.N864N,CACNA1G:NM_001256332:exon11:c.C2592T:p.…	0.0178	9.831
1	218520346	1:218520346:G:A	G	A	0.000502008	2988	ADD	4.3282	1.23016	9.12811	0.0025171	exonic	TGFB2	.	synonymous_SNV	TGFB2:NM_001135599:exon1:c.G303A:p.K101K,TGFB2:NM_003238:exon1:c.G303A:p.K101K	0.0003	14.92
15	31327812	15:31327812:C:T	C	T	0.000334784	2987	ADD	4.48865	1.45241	9.12487	0.00252156	exonic	TRPM1	.	synonymous_SNV	TRPM1:NM_001252020:exon20:c.G2688A:p.P896P,TRPM1:NM_002420:exon20:c.G2571A:p.P857P,TRPM1:NM_001252024:exon21:c.G2637A:p.P879P	0.0003	8.752
2	36737128	2:36737128:G:A	G	A	0.0135815	2982	ADD	1.6136	0.449049	9.12461	0.00252191	exonic	CRIM1	.	nonsynonymous_SNV	CRIM1:NM_016441:exon9:c.G1504A:p.E502K	0.0145	21.9
22	36697694	22:36697694:C:T	C	T	0.000672043	2976	ADD	3.77204	1.2005	9.11997	0.00252831	exonic	MYH9	.	synonymous_SNV	MYH9:NM_002473:exon21:c.G2517A:p.Q839Q	0.0137	12.23
16	84473123	16:84473123:G:A	G	A	0.000335008	2985	ADD	4.43619	1.42986	9.11968	0.00252872	exonic	ATP2C2	.	nonsynonymous_SNV	ATP2C2:NM_001291454:exon10:c.G749A:p.R250H,ATP2C2:NM_001286527:exon13:c.G1202A:p.R401H,ATP2C2:NM_014861:exon13:c.G1202A:p.R401H	0.0055	8.57
9	113169126	9:113169126:G:A	G	A	0.451486	2927	ADD	-0.535476	0.173874	9.11745	0.0025318	exonic	SVEP1	.	synonymous_SNV	SVEP1:NM_153366:exon38:c.C8754T:p.H2918H	0.4636	0.068
22	43618682	22:43618682:C:T	C	T	0.000336134	2975	ADD	4.42844	1.42631	9.11741	0.00253186	exonic	SCUBE1	.	nonsynonymous_SNV	SCUBE1:NM_173050:exon12:c.G1394A:p.R465H	0.0004	22.2
12	122691667	12:122691667:G:A	G	A	0.000334784	2987	ADD	4.50411	1.46067	9.11666	0.00253291	exonic	B3GNT4	.	nonsynonymous_SNV	B3GNT4:NM_001330492:exon2:c.G794A:p.R265H,B3GNT4:NM_030765:exon3:c.G869A:p.R290H	0.0033	9.599
1	201104847	1:201104847:G:C	G	C	0.000334672	2988	ADD	4.41215	1.42118	9.10799	0.00254495	exonic	TMEM9	.	nonsynonymous_SNV	TMEM9:NM_001288565:exon5:c.C496G:p.L166V,TMEM9:NM_001288564:exon6:c.C496G:p.L166V,TMEM9:NM_001288566:exon6:c.C496G:p.L166V,TMEM9:NM_001288567:exon6:c.C496G:p.L166V,TMEM9:NM_001288568:exon6:c.C496G:p.L166V,TMEM9:NM_001288569:exon6:c.C496G:p.L166V,TMEM9:NM_001288570:exon6:c.C505G:p.L169V,TMEM9:NM_001288571:exon6:c.C571G:p.L191V,TMEM9:NM_016456:exon6:c.C496G:p.L166V	6.677e-05	22
15	59323409	15:59323409:A:G	A	G	0.000334672	2988	ADD	4.44403	1.43532	9.10382	0.00255076	exonic	RNF111	.	nonsynonymous_SNV	RNF111:NM_001270528:exon2:c.A388G:p.N130D,RNF111:NM_001270529:exon2:c.A388G:p.N130D,RNF111:NM_001270530:exon2:c.A388G:p.N130D,RNF111:NM_001330331:exon2:c.A388G:p.N130D,RNF111:NM_017610:exon2:c.A388G:p.N130D	0.0002	17.33
19	53644357	19:53644357:C:A	C	A	0.000504711	2972	ADD	4.30356	1.21494	9.10265	0.00255241	exonic	ZNF347	.	nonsynonymous_SNV	ZNF347:NM_001172674:exon5:c.G1727T:p.G576V,ZNF347:NM_001172675:exon5:c.G1727T:p.G576V,ZNF347:NM_032584:exon5:c.G1724T:p.G575V	0.0004	18.01
20	5169799	20:5169799:C:T	C	T	0.000334672	2988	ADD	4.41719	1.42438	9.09967	0.00255658	exonic	CDS2	.	synonymous_SNV	CDS2:NM_003818:exon11:c.C1068T:p.F356F	0.1006	8.783
15	75042328	15:75042328:G:A	G	A	0.00171057	2923	ADD	2.97565	0.81241	9.0978	0.00255918	exonic	CYP1A2	.	synonymous_SNV	CYP1A2:NM_000761:exon2:c.G249A:p.T83T	0.0016	0.983
15	48559813	15:48559813:C:T	C	T	0.000334784	2987	ADD	4.80445	1.61081	9.09753	0.00255953	exonic	SLC12A1	.	nonsynonymous_SNV	SLC12A1:NM_000338:exon18:c.C2210T:p.A737V,SLC12A1:NM_001184832:exon18:c.C2210T:p.A737V	0.046	20.5
16	30567217	16:30567217:A:G	A	G	0.0055593	2968	ADD	2.06748	0.567114	9.09686	0.00256047	exonic	ZNF764	.	synonymous_SNV	ZNF764:NM_001172679:exon3:c.T522C:p.H174H,ZNF764:NM_033410:exon3:c.T525C:p.H175H	0.0076	0.231
12	113726606	12:113726606:G:A	G	A	0.00033456	2989	ADD	4.41756	1.42519	9.09644	0.00256106	exonic	TPCN1	.	nonsynonymous_SNV	TPCN1:NM_001301214:exon20:c.G1546A:p.V516M,TPCN1:NM_001351347:exon20:c.G1546A:p.V516M,TPCN1:NM_017901:exon21:c.G1750A:p.V584M,TPCN1:NM_001143819:exon22:c.G1966A:p.V656M,TPCN1:NM_001351346:exon22:c.G1546A:p.V516M	0.0003	25.2
3	17255828	3:17255828:G:A	G	A	0.000336247	2974	ADD	4.39658	1.41572	9.0958	0.00256195	exonic	TBC1D5	.	synonymous_SNV	TBC1D5:NM_001349091:exon16:c.C1215T:p.S405S,TBC1D5:NM_001349080:exon17:c.C1623T:p.S541S,TBC1D5:NM_001349086:exon17:c.C1281T:p.S427S,TBC1D5:NM_001349087:exon17:c.C1215T:p.S405S,TBC1D5:NM_001349089:exon17:c.C1215T:p.S405S,TBC1D5:NM_001349073:exon18:c.C1689T:p.S563S,TBC1D5:NM_001349077:exon18:c.C1623T:p.S541S,TBC1D5:NM_001349078:exon18:c.C1623T:p.S541S,TBC1D5:NM_001349081:exon18:c.C1644T:p.S548S,TBC…	4.493e-05	8.665
5	150175109	5:150175109:C:T	C	T	0.00770548	2920	ADD	1.65047	0.478138	9.09468	0.00256354	exonic	SMIM3	.	nonsynonymous_SNV	SMIM3:NM_032947:exon2:c.C107T:p.S36L	0.0137	24.7
1	109795370	1:109795370:G:A	G	A	0.00050184	2989	ADD	4.31471	1.22856	9.09332	0.00256543	exonic	CELSR2	.	nonsynonymous_SNV	CELSR2:NM_001408:exon1:c.G2669A:p.R890Q	0.0003	20.5
10	11908638	10:11908638:G:A	G	A	0.00083696	2987	ADD	3.1096	0.95637	9.09025	0.00256974	exonic	PROSER2	.	nonsynonymous_SNV	PROSER2:NM_153256:exon3:c.G247A:p.D83N	0.001	22.5
6	136977532	6:136977532:C:G	C	G	0.000334672	2988	ADD	4.66152	2.18223	9.08996	0.00257016	exonic	MAP3K5	.	nonsynonymous_SNV	MAP3K5:NM_005923:exon10:c.G1593C:p.Q531H	0.0184	19.05
11	76873225	11:76873225:A:G	A	G	0.000334672	2988	ADD	4.53242	1.47832	9.08843	0.00257229	exonic	MYO7A	.	nonsynonymous_SNV	MYO7A:NM_000260:exon13:c.A1403G:p.H468R,MYO7A:NM_001127180:exon13:c.A1403G:p.H468R,MYO7A:NM_001369365:exon14:c.A1370G:p.H457R	0.001	22.5
1	16262141	1:16262141:C:T	C	T	0.000334784	2987	ADD	4.501	1.46411	9.08576	0.00257608	exonic	SPEN	.	nonsynonymous_SNV	SPEN:NM_015001:exon11:c.C9406T:p.R3136C	0.0025	25.8
23	114424836	X:114424836:G:A	G	A	0.0566164	2985	ADD	0.743195	0.219093	9.08387	0.00257875	exonic	RBMXL3	.	nonsynonymous_SNV	RBMXL3:NM_001145346:exon1:c.G832A:p.D278N	0.0939	NA
9	140093902	9:140093902:G:C	G	C	0.000345066	2898	ADD	4.40613	1.42118	9.08205	0.00258131	exonic	TPRN	.	nonsynonymous_SNV	TPRN:NM_001128228:exon1:c.C1262G:p.P421R	0.001	18.57
3	105266355	3:105266355:C:T	C	T	0.00285235	2980	ADD	2.35095	0.650286	9.07837	0.00258649	exonic	ALCAM	.	synonymous_SNV	ALCAM:NM_001243280:exon11:c.C1362T:p.S454S,ALCAM:NM_001243281:exon11:c.C1362T:p.S454S,ALCAM:NM_001627:exon11:c.C1362T:p.S454S	0.0099	11.68
1	27878283	1:27878283:C:T	C	T	0.000336474	2972	ADD	4.49915	1.46416	9.07743	0.00258786	exonic	AHDC1	.	nonsynonymous_SNV	AHDC1:NM_001029882:exon6:c.G344A:p.R115Q	0.0002	23.2
7	21824122	7:21824122:G:A	G	A	0.146604	2974	ADD	0.669417	0.205537	9.07109	0.00259681	exonic	DNAH11	.	synonymous_SNV	DNAH11:NM_001277115:exon58:c.G9561A:p.L3187L	0.1985	9.475
6	119399333	6:119399333:C:T	C	T	0.000522102	2873	ADD	4.27649	1.20394	9.06856	0.0026004	exonic	FAM184A	.	nonsynonymous_SNV	FAM184A:NM_024581:exon1:c.G132A:p.M44I	0.0003	24.6
10	127967543	10:127967543:C:G	C	G	0.000334672	2988	ADD	4.38831	1.41666	9.06785	0.00260142	exonic	ADAM12	.	synonymous_SNV	ADAM12:NM_001288973:exon3:c.G201C:p.V67V,ADAM12:NM_001288974:exon3:c.G201C:p.V67V,ADAM12:NM_001288975:exon3:c.G201C:p.V67V,ADAM12:NM_003474:exon3:c.G201C:p.V67V,ADAM12:NM_021641:exon3:c.G201C:p.V67V	0.0003	0.783
10	99214508	10:99214508:G:A	G	A	0.000334784	2987	ADD	4.64814	1.53715	9.06701	0.00260262	exonic	ZDHHC16	.	nonsynonymous_SNV	ZDHHC16:NM_198045:exon6:c.G533A:p.R178Q,ZDHHC16:NM_198043:exon7:c.G728A:p.R243Q,ZDHHC16:NM_198044:exon7:c.G659A:p.R220Q,ZDHHC16:NM_032327:exon8:c.G776A:p.R259Q,ZDHHC16:NM_001287803:exon9:c.G776A:p.R259Q,ZDHHC16:NM_198046:exon9:c.G776A:p.R259Q	0.0012	22
3	77657041	3:77657041:C:G	C	G	0.000334672	2988	ADD	4.40528	1.42433	9.06677	0.00260298	exonic	ROBO2	.	nonsynonymous_SNV	ROBO2:NM_002942:exon21:c.C3229G:p.P1077A,ROBO2:NM_001290039:exon22:c.C3241G:p.P1081A,ROBO2:NM_001290040:exon22:c.C3241G:p.P1081A,ROBO2:NM_001290065:exon22:c.C1450G:p.P484A	0.0004	21.5
11	77378505	11:77378505:A:G	A	G	0.0977966	2950	ADD	0.748737	0.225994	9.06471	0.00260591	exonic	RSF1	.	synonymous_SNV	RSF1:NM_016578:exon16:c.T3783C:p.D1261D	0.3103	8.757
4	128941236	4:128941236:T:C	T	C	0.000334672	2988	ADD	4.4607	1.44917	9.0633	0.00260789	exonic	ABHD18	.	startloss	ABHD18:NM_001319306:exon8:c.T230C:p.M77T,ABHD18:NM_001366041:exon8:c.T230C:p.M77T,ABHD18:NM_001366047:exon8:c.T230C:p.M77T,ABHD18:NM_025097:exon8:c.T2C:p.M1?,ABHD18:NM_001039717:exon9:c.T611C:p.M204T,ABHD18:NM_001319305:exon9:c.T365C:p.M122T,ABHD18:NM_001319307:exon9:c.T104C:p.M35T,ABHD18:NM_001358451:exon9:c.T611C:p.M204T,ABHD18:NM_001366037:exon9:c.T104C:p.M35T,ABHD18:NM_001366039:exon9:c.T611C…	0.0004	27.7
4	129925010	4:129925010:A:T	A	T	0.00487559	2974	ADD	2.05581	0.58056	9.05983	0.00261288	exonic	SCLT1	.	nonsynonymous_SNV	SCLT1:NM_144643:exon6:c.T312A:p.D104E	0.0075	13.67
1	45793727	1:45793727:G:C	G	C	0.00050184	2989	ADD	4.2767	1.20602	9.05745	0.00261625	exonic	HPDL	.	nonsynonymous_SNV	HPDL:NM_032756:exon1:c.G907C:p.E303Q	0.0002	6.775
1	45800178	1:45800178:G:A	G	A	0.00050184	2989	ADD	4.2767	1.20602	9.05745	0.00261625	exonic	MUTYH	.	synonymous_SNV	MUTYH:NM_001048171:exon2:c.C42T:p.I14I,MUTYH:NM_001128425:exon2:c.C42T:p.I14I,MUTYH:NM_001293190:exon2:c.C42T:p.I14I,MUTYH:NM_012222:exon2:c.C42T:p.I14I	0.0002	12.79
1	86948041	1:86948041:A:G	A	G	0.00033456	2989	ADD	4.38085	1.41564	9.05358	0.0026218	exonic	CLCA1	.	nonsynonymous_SNV	CLCA1:NM_001285:exon5:c.A711G:p.I237M	6.662e-05	22.9
2	128712741	2:128712741:G:A	G	A	0.000334784	2987	ADD	4.58191	1.5082	9.04808	0.00262972	exonic	SAP130	.	synonymous_SNV	SAP130:NM_001330300:exon15:c.C2133T:p.A711A,SAP130:NM_001330303:exon15:c.C2136T:p.A712A,SAP130:NM_024545:exon15:c.C2214T:p.A738A,SAP130:NM_001145928:exon16:c.C2319T:p.A773A,SAP130:NM_001330299:exon16:c.C2238T:p.A746A,SAP130:NM_001330301:exon16:c.C2241T:p.A747A,SAP130:NM_001330302:exon16:c.C2238T:p.A746A	6.662e-05	2.928
2	219895411	2:219895411:C:T	C	T	0.000335345	2982	ADD	4.37926	1.41577	9.04537	0.0026336	exonic	CFAP65	.	synonymous_SNV	CFAP65:NM_001278296:exon8:c.G966A:p.A322A,CFAP65:NM_001278295:exon9:c.G1128A:p.A376A,CFAP65:NM_194302:exon9:c.G1161A:p.A387A	0.0003	22.4
8	63985557	8:63985557:C:T	C	T	0.000335683	2979	ADD	4.39139	1.4221	9.03978	0.00264168	exonic	TTPA	.	nonsynonymous_SNV	TTPA:NM_000370:exon2:c.G295A:p.G99S	6.27e-05	24.2
19	9492013	19:9492013:G:A	G	A	0.000675447	2961	ADD	3.87392	1.14894	9.03961	0.00264192	exonic	ZNF177\x3bZNF559-ZNF177	.	nonsynonymous_SNV	ZNF177:NM_001172651:exon6:c.G1006A:p.G336R,ZNF177:NM_003451:exon9:c.G526A:p.G176R,ZNF559-ZNF177:NM_001172650:exon12:c.G526A:p.G176R	0.0007	28.2
5	132101139	5:132101139:G:A	G	A	0.000334896	2986	ADD	4.43276	1.44061	9.03739	0.00264515	exonic	SEPTIN8	.	nonsynonymous_SNV	SEPTIN8:NM_001098811:exon2:c.C113T:p.S38L,SEPTIN8:NM_001098812:exon2:c.C113T:p.S38L,SEPTIN8:NM_001300798:exon2:c.C113T:p.S38L,SEPTIN8:NM_001300799:exon2:c.C113T:p.S38L,SEPTIN8:NM_015146:exon2:c.C113T:p.S38L	0.0004	26.1
6	137330503	6:137330503:G:T	G	T	0.00635877	2988	ADD	1.98644	0.554038	9.03737	0.00264515	exonic	IL20RA	.	nonsynonymous_SNV	IL20RA:NM_001278723:exon3:c.C197A:p.S66Y,IL20RA:NM_001278724:exon3:c.C131A:p.S44Y,IL20RA:NM_001278722:exon4:c.C383A:p.S128Y,IL20RA:NM_014432:exon4:c.C530A:p.S177Y	0.0072	26.1
16	81968072	16:81968072:C:T	C	T	0.000672043	2976	ADD	4.21618	1.12074	9.03588	0.00264734	exonic	PLCG2	.	synonymous_SNV	PLCG2:NM_002661:exon26:c.C2778T:p.I926I	0.0013	9.69
5	129520679	5:129520679:G:A	G	A	0.00543109	2946	ADD	1.88777	0.546064	9.03401	0.00265003	exonic	CHSY3	.	nonsynonymous_SNV	CHSY3:NM_175856:exon3:c.G1844A:p.G615E	0.295	8.097
9	35075022	9:35075022:C:T	C	T	0.0120482	2988	ADD	1.50184	0.427371	9.03304	0.00265143	exonic	FANCG	.	nonsynonymous_SNV	FANCG:NM_004629:exon12:c.G1538A:p.R513Q	0.0281	19.62
8	145756173	8:145756173:G:A	G	A	0.0230228	2845	ADD	1.27857	0.371833	9.03174	0.00265332	exonic	ARHGAP39	.	synonymous_SNV	ARHGAP39:NM_001308208:exon10:c.C2970T:p.Y990Y,ARHGAP39:NM_025251:exon10:c.C3063T:p.Y1021Y,ARHGAP39:NM_001308207:exon11:c.C2970T:p.Y990Y	0.0217	6.344
1	247025341	1:247025341:G:A	G	A	0.0011741	2981	ADD	3.17948	0.942411	9.03089	0.00265454	exonic	AHCTF1	.	nonsynonymous_SNV	AHCTF1:NM_001323342:exon28:c.C3655T:p.P1219S,AHCTF1:NM_001323343:exon28:c.C3655T:p.P1219S,AHCTF1:NM_015446:exon28:c.C3682T:p.P1228S	0.0011	22.9
21	43519205	21:43519205:G:T	G	T	0.000334672	2988	ADD	4.38639	1.42145	9.03	0.00265583	exonic	UMODL1	.	synonymous_SNV	UMODL1:NM_001004416:exon7:c.G1101T:p.G367G,UMODL1:NM_001199527:exon7:c.G885T:p.G295G,UMODL1:NM_001199528:exon7:c.G885T:p.G295G,UMODL1:NM_173568:exon7:c.G1101T:p.G367G	0.0001	4.549
8	145999583	8:145999583:G:A	G	A	0.000334784	2987	ADD	4.37229	1.41528	9.02883	0.00265754	exonic	ZNF34	.	nonsynonymous_SNV	ZNF34:NM_001286770:exon5:c.C631T:p.H211Y,ZNF34:NM_001286769:exon6:c.C688T:p.H230Y,ZNF34:NM_030580:exon6:c.C751T:p.H251Y	3.249e-05	8.576
19	10741981	19:10741981:C:T	C	T	0.000334672	2988	ADD	4.38663	1.42158	9.02882	0.00265754	exonic	SLC44A2	.	nonsynonymous_SNV	SLC44A2:NM_001145056:exon6:c.C355T:p.L119F,SLC44A2:NM_001363611:exon6:c.C361T:p.L121F,SLC44A2:NM_020428:exon6:c.C361T:p.L121F	0.0015	21.1
21	45012185	21:45012185:A:G	A	G	0.000334784	2987	ADD	4.48811	1.46759	9.02771	0.00265919	exonic	HSF2BP	.	synonymous_SNV	HSF2BP:NM_007031:exon8:c.T717C:p.N239N	0.0018	7.099
12	32480474	12:32480474:C:T	C	T	0.000334672	2988	ADD	4.63101	1.53406	9.02734	0.00265968	exonic	BICD1	.	nonsynonymous_SNV	BICD1:NM_001003398:exon5:c.C1085T:p.T362M,BICD1:NM_001354186:exon5:c.C1085T:p.T362M,BICD1:NM_001354187:exon5:c.C1085T:p.T362M,BICD1:NM_001354188:exon5:c.C1085T:p.T362M,BICD1:NM_001354189:exon5:c.C1085T:p.T362M,BICD1:NM_001363603:exon5:c.C1085T:p.T362M,BICD1:NM_001714:exon5:c.C1085T:p.T362M	0.0012	24.4
16	21289469	16:21289469:GAGA:G	GAGA	G	0.000335796	2978	ADD	4.69927	1.56947	9.02503	0.00266305	exonic	CRYM	.	nonframeshift_deletion	CRYM:NM_001888:exon3:c.101_103del:p.F34del	0	22.4
1	16459694	1:16459694:T:C	T	C	0.00050184	2989	ADD	4.40005	1.27324	9.025	0.00266312	exonic	EPHA2	.	synonymous_SNV	EPHA2:NM_001329090:exon10:c.A1872G:p.L624L,EPHA2:NM_004431:exon11:c.A2034G:p.L678L	0.1176	12.94
2	42515388	2:42515388:A:G	A	G	0.906293	2876	ADD	-0.763851	0.231175	9.02474	0.00266348	exonic	EML4	.	nonsynonymous_SNV	EML4:NM_001145076:exon10:c.A970G:p.I324V,EML4:NM_019063:exon11:c.A1144G:p.I382V	0.9471	19.17
19	10439693	19:10439693:C:T	C	T	0.000338868	2951	ADD	4.38594	1.4216	9.02394	0.00266465	exonic	RAVER1	.	synonymous_SNV	RAVER1:NM_001366174:exon3:c.G381A:p.L127L,RAVER1:NM_133452:exon3:c.G381A:p.L127L	0.0007	11.36
12	106461213	12:106461213:C:T	C	T	0.0016728	2989	ADD	2.66565	0.784228	9.02267	0.00266649	exonic	NUAK1	.	synonymous_SNV	NUAK1:NM_014840:exon7:c.G1353A:p.P451P	0.0458	0.084
19	51518759	19:51518759:G:A	G	A	0.000334672	2988	ADD	4.37226	1.41677	9.01987	0.00267061	exonic	KLK10	.	nonsynonymous_SNV	KLK10:NM_001077500:exon5:c.C592T:p.P198S,KLK10:NM_002776:exon5:c.C592T:p.P198S,KLK10:NM_145888:exon5:c.C592T:p.P198S	0.0003	16
1	45341360	1:45341360:T:C	T	C	0.00133824	2989	ADD	3.01625	0.843491	9.01493	0.00267781	exonic	EIF2B3	.	nonsynonymous_SNV	EIF2B3:NM_001166588:exon9:c.A983G:p.K328R,EIF2B3:NM_001261418:exon9:c.A983G:p.K328R,EIF2B3:NM_020365:exon9:c.A983G:p.K328R	0.0076	22.7
3	50332501	3:50332501:C:T	C	T	0.0020087	2987	ADD	2.93275	0.786333	9.01148	0.00268287	exonic	HYAL3	.	nonsynonymous_SNV	HYAL3:NM_001200029:exon2:c.G533A:p.R178H,HYAL3:NM_001200030:exon2:c.G533A:p.R178H,HYAL3:NM_003549:exon2:c.G533A:p.R178H	0.0327	25
11	68851414	11:68851414:T:C	T	C	0.990291	2987	ADD	-1.5973	0.455923	9.01078	0.00268392	exonic	TPCN2	.	nonsynonymous_SNV	TPCN2:NM_139075:exon19:c.T1691C:p.L564P	0.9911	17.09
3	142238542	3:142238542:G:A	G	A	0.000334672	2988	ADD	4.36635	1.41553	9.01017	0.00268485	exonic	ATR	.	nonsynonymous_SNV	ATR:NM_001354579:exon23:c.C4159T:p.R1387W,ATR:NM_001184:exon24:c.C4351T:p.R1451W	0.0009	26.6
19	38845410	19:38845410:A:T	A	T	0.000335008	2985	ADD	4.97932	1.72535	9.00191	0.00269699	exonic	CATSPERG	.	nonsynonymous_SNV	CATSPERG:NM_001330496:exon9:c.A1058T:p.H353L,CATSPERG:NM_021185:exon9:c.A1058T:p.H353L	0.0001	7.343
16	2147362	16:2147362:G:A	G	A	0.000349406	2862	ADD	4.62678	1.5358	9.00144	0.00269768	exonic	PKD1	.	synonymous_SNV	PKD1:NM_000296:exon33:c.C10360T:p.L3454L,PKD1:NM_001009944:exon33:c.C10363T:p.L3455L	0.0014	1.98
8	1626446	8:1626446:G:A	G	A	0.000502008	2988	ADD	4.43533	1.2899	8.99958	0.00270041	exonic	DLGAP2	.	synonymous_SNV	DLGAP2:NM_001346810:exon12:c.G2355A:p.G785G	0.0002	9.254
1	207112632	1:207112632:C:T	C	T	0.000334672	2988	ADD	4.42589	1.44384	8.99632	0.0027052	exonic	PIGR	.	nonsynonymous_SNV	PIGR:NM_002644:exon3:c.G220A:p.V74I	0.0005	0.007
1	89616192	1:89616192:T:C	T	C	0.00033456	2989	ADD	4.36272	1.41683	8.99285	0.00271038	exonic	GBP7	.	nonsynonymous_SNV	GBP7:NM_207398:exon6:c.A692G:p.Q231R	0.0585	4.906
16	30567190	16:30567190:A:G	A	G	0.00554622	2975	ADD	2.04909	0.565994	8.98841	0.002717	exonic	ZNF764	.	synonymous_SNV	ZNF764:NM_001172679:exon3:c.T549C:p.F183F,ZNF764:NM_033410:exon3:c.T552C:p.F184F	0.0074	9.891
23	153296046	X:153296046:G:A	G	A	0.00118243	2960	ADD	3.61597	1.10312	8.98655	0.00271976	exonic	MECP2	.	synonymous_SNV	MECP2:NM_001110792:exon3:c.C1269T:p.S423S,MECP2:NM_001369394:exon3:c.C954T:p.S318S,MECP2:NM_001369393:exon4:c.C954T:p.S318S,MECP2:NM_004992:exon4:c.C1233T:p.S411S,MECP2:NM_001316337:exon5:c.C954T:p.S318S,MECP2:NM_001369392:exon5:c.C954T:p.S318S,MECP2:NM_001369391:exon7:c.C954T:p.S318S	0.2479	NA
14	21794057	14:21794057:G:A	G	A	0.000334672	2988	ADD	4.359	1.41633	8.98425	0.00272314	exonic	RPGRIP1	.	nonsynonymous_SNV	RPGRIP1:NM_020366:exon16:c.G2435A:p.R812Q	0.0061	10.29
1	19062163	1:19062163:C:T	C	T	0.00150602	2988	ADD	2.89066	0.78122	8.97972	0.00272992	exonic	PAX7	.	nonsynonymous_SNV	PAX7:NM_001135254:exon8:c.C1193T:p.P398L,PAX7:NM_002584:exon8:c.C1193T:p.P398L,PAX7:NM_013945:exon8:c.C1187T:p.P396L	0.002	18.81
20	36932647	20:36932647:G:A	G	A	0.00669792	2986	ADD	1.93948	0.53286	8.97217	0.00274126	exonic	BPI	.	nonsynonymous_SNV	BPI:NM_001725:exon1:c.G34A:p.A12T	0.0215	0.002
4	2958404	4:2958404:C:T	C	T	0.00033456	2989	ADD	4.3756	1.42586	8.97055	0.00274366	exonic	NOP14	.	synonymous_SNV	NOP14:NM_001291978:exon3:c.G465A:p.T155T,NOP14:NM_001291979:exon3:c.G465A:p.T155T,NOP14:NM_003703:exon3:c.G465A:p.T155T	0.001	0.195
3	42916732	3:42916732:C:G	C	G	0.000502681	2984	ADD	4.23297	1.20039	8.96925	0.00274562	exonic	CYP8B1	.	nonsynonymous_SNV	CYP8B1:NM_004391:exon1:c.G577C:p.E193Q	0.001	13.35
19	14211716	19:14211716:T:C	T	C	0.000334784	2987	ADD	4.56914	1.51478	8.96721	0.00274865	exonic	PRKACA	.	nonsynonymous_SNV	PRKACA:NM_001304349:exon5:c.A569G:p.N190S,PRKACA:NM_002730:exon5:c.A341G:p.N114S,PRKACA:NM_207518:exon5:c.A317G:p.N106S	0.0005	18.99
1	36439027	1:36439027:C:T	C	T	0.000502681	2984	ADD	4.26927	1.21745	8.963	0.00275499	exonic	AGO3	.	synonymous_SNV	AGO3:NM_024852:exon5:c.C573T:p.H191H	0.0004	11.26
19	10939792	19:10939792:T:C	T	C	0.303025	2975	ADD	-0.613084	0.205649	8.95412	0.00276847	exonic	DNM2	.	synonymous_SNV	DNM2:NM_001005362:exon18:c.T2127C:p.A709A,DNM2:NM_004945:exon18:c.T2127C:p.A709A,DNM2:NM_001005360:exon19:c.T2139C:p.A713A,DNM2:NM_001005361:exon19:c.T2139C:p.A713A,DNM2:NM_001190716:exon19:c.T2139C:p.A713A	0.5886	0.663
8	100977644	8:100977644:T:C	T	C	0.0297762	2905	ADD	1.06768	0.314894	8.94832	0.00277722	exonic	RGS22	.	synonymous_SNV	RGS22:NM_001286693:exon22:c.A2991G:p.Q997Q,RGS22:NM_001286692:exon24:c.A3498G:p.Q1166Q,RGS22:NM_015668:exon24:c.A3534G:p.Q1178Q	0.0275	0.235
7	23293873	7:23293873:TAGATGCCAAAAGGA:T	TAGATGCCAAAAGGA	T	0.000334896	2986	ADD	4.64499	1.55553	8.94531	0.00278183	exonic	GPNMB	.	frameshift_deletion	GPNMB:NM_001005340:exon3:c.310_323del:p.K107Wfs*6,GPNMB:NM_002510:exon3:c.310_323del:p.K107Wfs*6	0.0013	32
7	27211781	7:27211781:C:G	C	G	0.00150552	2989	ADD	3.07347	0.886301	8.93884	0.00279171	exonic	HOXA10	.	nonsynonymous_SNV	HOXA10:NM_018951:exon2:c.G970C:p.G324R	0.0026	21.9
3	125828928	3:125828928:C:T	C	T	0.000502008	2988	ADD	4.44454	1.30813	8.93789	0.00279312	exonic	ALDH1L1	.	nonsynonymous_SNV	ALDH1L1:NM_001270365:exon18:c.G1903A:p.V635M,ALDH1L1:NM_001270364:exon20:c.G2236A:p.V746M,ALDH1L1:NM_012190:exon20:c.G2206A:p.V736M	0.0001	17.21
16	88555464	16:88555464:G:A	G	A	0.00274443	2915	ADD	2.10933	0.613389	8.93048	0.00280453	exonic	ZFPM1	.	synonymous_SNV	ZFPM1:NM_153813:exon3:c.G171A:p.P57P	0.0132	0.027
12	80201093	12:80201093:C:T	C	T	0.000345423	2895	ADD	4.3546	1.42133	8.93002	0.00280524	exonic	PPP1R12A	.	nonsynonymous_SNV	PPP1R12A:NM_001143886:exon12:c.G1307A:p.R436Q,PPP1R12A:NM_001244992:exon12:c.G1568A:p.R523Q,PPP1R12A:NM_002480:exon12:c.G1568A:p.R523Q,PPP1R12A:NM_001143885:exon13:c.G1568A:p.R523Q,PPP1R12A:NM_001244990:exon13:c.G1568A:p.R523Q	0.0052	23.5
2	152553170	2:152553170:T:C	T	C	0.000334784	2987	ADD	4.34703	1.41954	8.92892	0.00280692	exonic	NEB	.	nonsynonymous_SNV	NEB:NM_001164507:exon17:c.A1550G:p.N517S,NEB:NM_001164508:exon17:c.A1550G:p.N517S,NEB:NM_001271208:exon17:c.A1550G:p.N517S,NEB:NM_004543:exon17:c.A1550G:p.N517S	0.0003	23.4
2	219893001	2:219893001:G:A	G	A	0.000335233	2983	ADD	4.45214	1.4671	8.92317	0.00281579	exonic	CFAP65	.	synonymous_SNV	CFAP65:NM_001278296:exon11:c.C1578T:p.P526P,CFAP65:NM_001278295:exon12:c.C1740T:p.P580P,CFAP65:NM_194302:exon12:c.C1773T:p.P591P	8.956e-05	2.739
3	62358298	3:62358298:C:T	C	T	0.00100368	2989	ADD	3.08987	0.942529	8.9212	0.00281877	exonic	FEZF2	.	synonymous_SNV	FEZF2:NM_018008:exon2:c.G246A:p.E82E	0.0019	11.44
2	39184180	2:39184180:G:A	G	A	0.000334672	2988	ADD	4.42352	1.45465	8.92048	0.00281988	exonic	ARHGEF33	.	synonymous_SNV	ARHGEF33:NM_001145451:exon12:c.G1362A:p.K454K,ARHGEF33:NM_001367623:exon12:c.G1362A:p.K454K	0.001	10.99
11	126306863	11:126306863:C:T	C	T	0.00083696	2987	ADD	4.22717	1.10513	8.92046	0.00281994	exonic	KIRREL3	.	synonymous_SNV	KIRREL3:NM_001161707:exon12:c.G1395A:p.S465S,KIRREL3:NM_001301097:exon12:c.G1395A:p.S465S,KIRREL3:NM_032531:exon12:c.G1395A:p.S465S	0.0007	6.091
6	7374019	6:7374019:T:G	T	G	0.000502008	2988	ADD	4.25026	1.22444	8.91913	0.00282202	exonic	CAGE1	.	nonsynonymous_SNV	CAGE1:NM_205864:exon4:c.A625C:p.T209P,CAGE1:NM_001170692:exon5:c.A1033C:p.T345P,CAGE1:NM_001170693:exon5:c.A1033C:p.T345P	0.001	16.64
6	7373971	6:7373971:C:G	C	G	0.000502344	2986	ADD	4.25024	1.22445	8.91897	0.00282221	exonic	CAGE1	.	nonsynonymous_SNV	CAGE1:NM_205864:exon4:c.G673C:p.V225L,CAGE1:NM_001170692:exon5:c.G1081C:p.V361L,CAGE1:NM_001170693:exon5:c.G1081C:p.V361L	0.001	14.98
16	55600965	16:55600965:T:A	T	A	0.00398475	2886	ADD	2.0483	0.59085	8.91898	0.00282221	exonic	CAPNS2	.	nonsynonymous_SNV	CAPNS2:NM_032330:exon1:c.T297A:p.D99E	0.0084	14.65
3	184429332	3:184429332:T:C	T	C	0.00200803	2988	ADD	2.88784	0.776251	8.91624	0.00282644	exonic	MAGEF1	.	nonsynonymous_SNV	MAGEF1:NM_022149:exon1:c.A278G:p.K93R	0.0023	15.09
2	186673485	2:186673485:C:T	C	T	0.00104094	2882	ADD	3.29522	0.998652	8.91087	0.00283478	exonic	FSIP2	.	synonymous_SNV	FSIP2:NM_173651:exon17:c.C19452T:p.D6484D	0.0097	0.007
2	84831652	2:84831652:G:GC	G	GC	0.000512821	2925	ADD	4.5752	1.39969	8.90665	0.00284132	exonic	DNAH6	.	frameshift_insertion	DNAH6:NM_001370:exon19:c.3059dupC:p.E1022Rfs*5	0.0002	33
10	18827163	10:18827163:C:T	C	T	0.000502176	2987	ADD	4.32571	1.31834	8.89987	0.00285194	exonic	CACNB2	.	nonsynonymous_SNV	CACNB2:NM_000724:exon12:c.C1192T:p.L398F,CACNB2:NM_001330060:exon12:c.C1078T:p.L360F,CACNB2:NM_201570:exon12:c.C1213T:p.L405F,CACNB2:NM_201590:exon12:c.C1195T:p.L399F,CACNB2:NM_001167945:exon13:c.C1159T:p.L387F,CACNB2:NM_201571:exon13:c.C1273T:p.L425F,CACNB2:NM_201572:exon13:c.C1201T:p.L401F,CACNB2:NM_201593:exon13:c.C1243T:p.L415F,CACNB2:NM_201596:exon13:c.C1357T:p.L453F,CACNB2:NM_201597:exon13:…	0.0004	25.6
4	68780407	4:68780407:T:C	T	C	0.00351288	2989	ADD	2.30767	0.634549	8.89877	0.00285365	exonic	TMPRSS11A	.	nonsynonymous_SNV	TMPRSS11A:NM_001114387:exon9:c.A994G:p.I332V,TMPRSS11A:NM_182606:exon9:c.A1003G:p.I335V	0.0057	23.3
1	43812186	1:43812186:C:T	C	T	0.000334672	2988	ADD	4.36276	1.43069	8.89849	0.00285404	exonic	MPL	.	nonsynonymous_SNV	MPL:NM_005373:exon7:c.C1051T:p.R351C	0.001	25.7
2	233128129	2:233128129:C:T	C	T	0.000335008	2985	ADD	4.33392	1.41892	8.89593	0.00285805	exonic	DIS3L2	.	synonymous_SNV	DIS3L2:NM_152383:exon13:c.C1638T:p.D546D	0.0002	0.033
10	21806664	10:21806664:A:C	A	C	0.000167336	2988	ADD	4.7867	2.31602	8.89508	0.00285943	exonic	SKIDA1	.	nonsynonymous_SNV	SKIDA1:NM_207371:exon4:c.T88G:p.S30A	0	24.5
10	45878049	10:45878049:C:T	C	T	0.000167392	2987	ADD	4.78669	2.31601	8.89505	0.00285943	exonic	ALOX5	.	nonsynonymous_SNV	ALOX5:NM_000698:exon2:c.C269T:p.T90M,ALOX5:NM_001256153:exon2:c.C269T:p.T90M,ALOX5:NM_001256154:exon2:c.C269T:p.T90M,ALOX5:NM_001320861:exon2:c.C269T:p.T90M	0.0003	26.7
10	26789987	10:26789987:G:A	G	A	0.000167842	2979	ADD	4.78654	2.31593	8.89449	0.00286029	exonic	APBB1IP	.	nonsynonymous_SNV	APBB1IP:NM_019043:exon5:c.G400A:p.D134N	0.0002	23
16	89703755	16:89703755:G:A	G	A	0.00138841	2881	ADD	3.03908	0.867158	8.89185	0.00286444	exonic	DPEP1	.	synonymous_SNV	DPEP1:NM_001128141:exon7:c.G735A:p.R245R,DPEP1:NM_004413:exon7:c.G735A:p.R245R	0.002	2.629
12	130184414	12:130184414:G:T	G	T	0.00033456	2989	ADD	4.38067	1.43984	8.89033	0.00286682	exonic	TMEM132D	.	nonsynonymous_SNV	TMEM132D:NM_133448:exon2:c.C909A:p.D303E	8.957e-05	0.233
1	75204441	1:75204441:A:G	A	G	0.000334672	2988	ADD	4.49596	1.49303	8.88936	0.0028684	exonic	TYW3	.	nonsynonymous_SNV	TYW3:NM_138467:exon3:c.A323G:p.Q108R	8.967e-06	20.4
2	39006144	2:39006144:G:A	G	A	0.000334672	2988	ADD	4.3334	1.41941	8.8891	0.0028688	exonic	GEMIN6	.	stopgain	GEMIN6:NM_024775:exon2:c.G12A:p.W4X	6.663e-05	39
9	71986520	9:71986520:G:A	G	A	0.000334784	2987	ADD	4.3271	1.41665	8.88881	0.00286926	exonic	FAM189A2	.	nonsynonymous_SNV	FAM189A2:NM_001127608:exon3:c.G118A:p.D40N,FAM189A2:NM_001347995:exon3:c.G577A:p.D193N,FAM189A2:NM_004816:exon3:c.G118A:p.D40N	3.588e-05	24
12	12483193	12:12483193:G:A	G	A	0.0016728	2989	ADD	2.90552	0.788894	8.88863	0.00286952	exonic	MANSC1	.	nonsynonymous_SNV	MANSC1:NM_018050:exon4:c.C1064T:p.A355V,MANSC1:NM_001363613:exon5:c.C962T:p.A321V	0.002	8.156
7	138486096	7:138486096:G:C	G	C	0.638795	2954	ADD	-0.517595	0.165842	8.88728	0.00287164	exonic	TMEM213	.	nonsynonymous_SNV	TMEM213:NM_001085429:exon2:c.G107C:p.S36T	0.7285	0.03
9	96428317	9:96428317:C:T	C	T	0.000167336	2988	ADD	4.77944	2.31228	8.88726	0.00287164	exonic	PHF2	.	nonsynonymous_SNV	PHF2:NM_005392:exon16:c.C2162T:p.P721L	0.0008	21.8
9	97209131	9:97209131:T:C	T	C	0.000167336	2988	ADD	4.77944	2.31228	8.88726	0.00287164	exonic	MFSD14B	.	synonymous_SNV	MFSD14B:NM_032558:exon7:c.T756C:p.S252S	0.0071	11.55
9	97329582	9:97329582:A:G	A	G	0.00016728	2989	ADD	4.77945	2.31229	8.88729	0.00287164	exonic	FBP2	.	synonymous_SNV	FBP2:NM_003837:exon5:c.T675C:p.T225T	0.0812	8.538
9	136302895	9:136302895:C:T	C	T	0.000167336	2988	ADD	4.77944	2.31228	8.88726	0.00287164	exonic	ADAMTS13	.	nonsynonymous_SNV	ADAMTS13:NM_139025:exon13:c.C1462T:p.R488W,ADAMTS13:NM_139026:exon13:c.C1369T:p.R457W,ADAMTS13:NM_139027:exon13:c.C1462T:p.R488W	0.0012	21.5
9	139409790	9:139409790:G:A	G	A	0.000167336	2988	ADD	4.77944	2.31228	8.88726	0.00287164	exonic	NOTCH1	.	synonymous_SNV	NOTCH1:NM_017617:exon12:c.C1966T:p.L656L	0	6.428
9	95797732	9:95797732:C:G	C	G	0.000167392	2987	ADD	4.77943	2.31228	8.88722	0.00287171	exonic	FGD3	.	nonsynonymous_SNV	FGD3:NM_001369952:exon17:c.C1892G:p.S631C,FGD3:NM_001083536:exon18:c.C2039G:p.S680C,FGD3:NM_001286993:exon18:c.C2036G:p.S679C,FGD3:NM_001369951:exon18:c.C2039G:p.S680C,FGD3:NM_033086:exon18:c.C2039G:p.S680C	0	11.08
9	124522421	9:124522421:G:A	G	A	0.000167392	2987	ADD	4.77942	2.31227	8.88719	0.00287177	exonic	DAB2IP	.	synonymous_SNV	DAB2IP:NM_138709:exon4:c.G501A:p.L167L,DAB2IP:NM_032552:exon6:c.G789A:p.L263L	0.0075	9.361
9	127765461	9:127765461:G:A	G	A	0.000167392	2987	ADD	4.77942	2.31227	8.88719	0.00287177	exonic	SCAI	.	nonsynonymous_SNV	SCAI:NM_001144877:exon11:c.C997T:p.P333S,SCAI:NM_173690:exon12:c.C1066T:p.P356S	1.791e-05	26.9
9	15874561	9:15874561:C:T	C	T	0.000167336	2988	ADD	4.77938	2.31225	8.88703	0.00287204	exonic	CCDC171	.	nonsynonymous_SNV	CCDC171:NM_001355547:exon23:c.C3524T:p.A1175V,CCDC171:NM_173550:exon24:c.C3500T:p.A1167V,CCDC171:NM_001348002:exon25:c.C3245T:p.A1082V	0.0001	25.1
9	79321261	9:79321261:C:T	C	T	0.000167504	2985	ADD	4.77932	2.31221	8.8868	0.00287237	exonic	PRUNE2	.	nonsynonymous_SNV	PRUNE2:NM_001308047:exon8:c.G5929A:p.A1977T,PRUNE2:NM_001308048:exon8:c.G5929A:p.A1977T,PRUNE2:NM_015225:exon8:c.G5929A:p.A1977T	0.0472	0.001
9	79324778	9:79324778:A:G	A	G	0.000167729	2981	ADD	4.77924	2.31216	8.8865	0.0028729	exonic	PRUNE2	.	synonymous_SNV	PRUNE2:NM_001308047:exon8:c.T2412C:p.G804G,PRUNE2:NM_001308048:exon8:c.T2412C:p.G804G,PRUNE2:NM_015225:exon8:c.T2412C:p.G804G	0.0232	3.219
9	98209693	9:98209693:G:A	G	A	0.00016835	2970	ADD	4.77921	2.31215	8.8864	0.00287303	exonic	PTCH1	.	nonsynonymous_SNV	PTCH1:NM_001354918:exon22:c.C3689T:p.P1230L,PTCH1:NM_000264:exon23:c.C3845T:p.P1282L,PTCH1:NM_001083602:exon23:c.C3647T:p.P1216L,PTCH1:NM_001083603:exon23:c.C3842T:p.P1281L,PTCH1:NM_001083604:exon23:c.C3392T:p.P1131L,PTCH1:NM_001083605:exon23:c.C3392T:p.P1131L,PTCH1:NM_001083606:exon23:c.C3392T:p.P1131L,PTCH1:NM_001083607:exon23:c.C3392T:p.P1131L	0.0305	11.6
16	3778541	16:3778541:C:T	C	T	0.000167336	2988	ADD	4.78057	2.31328	8.88621	0.00287336	exonic	CREBBP	.	synonymous_SNV	CREBBP:NM_001079846:exon30:c.G6393A:p.Q2131Q,CREBBP:NM_004380:exon31:c.G6507A:p.Q2169Q	0	8.23
16	65016128	16:65016128:A:T	A	T	0.000167392	2987	ADD	4.78056	2.31327	8.88619	0.00287336	exonic	CDH11	.	nonsynonymous_SNV	CDH11:NM_001330576:exon7:c.T698A:p.I233N,CDH11:NM_001308392:exon8:c.T1076A:p.I359N,CDH11:NM_001797:exon8:c.T1076A:p.I359N	0	25.3
16	112685	16:112685:G:A	G	A	0.000167336	2988	ADD	4.78055	2.31327	8.88615	0.00287343	exonic	RHBDF1	.	synonymous_SNV	RHBDF1:NM_022450:exon7:c.C804T:p.I268I	5.798e-05	10.98
16	314067	16:314067:C:T	C	T	0.000167616	2983	ADD	4.7805	2.31324	8.88596	0.00287369	exonic	FAM234A	.	nonsynonymous_SNV	FAM234A:NM_001284497:exon11:c.C1241T:p.P414L,FAM234A:NM_032039:exon11:c.C1241T:p.P414L	0.0002	12.38
7	126086145	7:126086145:G:A	G	A	0.000335008	2985	ADD	4.39133	1.44572	8.88593	0.00287376	exonic	GRM8	.	synonymous_SNV	GRM8:NM_001127323:exon10:c.C2712T:p.S904S,GRM8:NM_001371085:exon10:c.C2712T:p.S904S	0.0001	16.53
16	722303	16:722303:C:T	C	T	0.000167504	2985	ADD	4.78048	2.31323	8.88588	0.00287382	exonic	RHOT2	.	synonymous_SNV	RHOT2:NM_001352279:exon13:c.C1092T:p.S364S,RHOT2:NM_001352286:exon13:c.C768T:p.S256S,RHOT2:NM_001352289:exon13:c.C582T:p.S194S,RHOT2:NM_001352291:exon13:c.C582T:p.S194S,RHOT2:NM_001352294:exon13:c.C582T:p.S194S,RHOT2:NM_001352276:exon14:c.C1194T:p.S398S,RHOT2:NM_001352277:exon14:c.C1191T:p.S397S,RHOT2:NM_001352278:exon14:c.C1146T:p.S382S,RHOT2:NM_001352282:exon14:c.C924T:p.S308S,RHOT2:NM_00135228…	3.616e-05	0.435
16	56792496	16:56792496:C:T	C	T	0.000167785	2980	ADD	4.78045	2.31321	8.88576	0.00287402	exonic	NUP93	.	stopgain	NUP93:NM_014669:exon3:c.C226T:p.Q76X	6.536e-05	38
16	58552754	16:58552754:C:A	C	A	0.000167842	2979	ADD	4.78038	2.31317	8.88554	0.00287435	exonic	SETD6	.	nonsynonymous_SNV	SETD6:NM_001160305:exon8:c.C1243A:p.L415M,SETD6:NM_024860:exon9:c.C1171A:p.L391M	9.746e-05	23
2	160204042	2:160204042:T:A	T	A	0.000334784	2987	ADD	4.55303	1.5211	8.88552	0.00287442	exonic	BAZ2B	.	synonymous_SNV	BAZ2B:NM_001289975:exon30:c.A5301T:p.V1767V,BAZ2B:NM_001329857:exon31:c.A5247T:p.V1749V,BAZ2B:NM_001329858:exon31:c.A5334T:p.V1778V,BAZ2B:NM_013450:exon31:c.A5409T:p.V1803V	0.0009	9.719
9	123173743	9:123173743:C:T	C	T	0.000169492	2950	ADD	4.77873	2.31187	8.88467	0.00287574	exonic	CDK5RAP2	.	nonsynonymous_SNV	CDK5RAP2:NM_001272039:exon26:c.G3617A:p.S1206N,CDK5RAP2:NM_001011649:exon29:c.G4307A:p.S1436N,CDK5RAP2:NM_018249:exon29:c.G4307A:p.S1436N	2.978e-05	16.11
9	5772717	9:5772717:C:G	C	G	0.00017059	2931	ADD	4.77844	2.3117	8.88357	0.00287746	exonic	RIC1	.	nonsynonymous_SNV	RIC1:NM_001206557:exon23:c.C3659G:p.P1220R,RIC1:NM_020829:exon24:c.C3770G:p.P1257R	6.665e-05	27.4
4	95561459	4:95561459:A:G	A	G	0.413915	2968	ADD	-0.541518	0.178209	8.8829	0.00287852	exonic	PDLIM5	.	nonsynonymous_SNV	PDLIM5:NM_001256425:exon8:c.A166G:p.T56A,PDLIM5:NM_001256428:exon8:c.A775G:p.T259A,PDLIM5:NM_001011513:exon9:c.A814G:p.T272A,PDLIM5:NM_006457:exon9:c.A1141G:p.T381A,PDLIM5:NM_001256427:exon10:c.A832G:p.T278A,PDLIM5:NM_001256426:exon13:c.A1228G:p.T410A	0.6139	0.001
12	10462262	12:10462262:A:G	A	G	0.000334784	2987	ADD	4.34871	1.42711	8.88201	0.00287992	exonic	KLRD1	.	synonymous_SNV	KLRD1:NM_007334:exon2:c.A45G:p.P15P,KLRD1:NM_002262:exon3:c.A138G:p.P46P,KLRD1:NM_001114396:exon4:c.A138G:p.P46P,KLRD1:NM_001351062:exon4:c.A138G:p.P46P,KLRD1:NM_001351060:exon5:c.A138G:p.P46P	0.0012	0.894
9	96715320	9:96715320:C:T	C	T	0.000171703	2912	ADD	4.77799	2.31143	8.88188	0.00288018	exonic	BARX1	.	nonsynonymous_SNV	BARX1:NM_021570:exon2:c.G373A:p.G125R	0	28.9
9	136320574	9:136320574:G:T	G	T	0.00017188	2909	ADD	4.77799	2.31143	8.88187	0.00288018	exonic	ADAMTS13	.	synonymous_SNV	ADAMTS13:NM_139025:exon25:c.G3417T:p.V1139V	0.0002	0.076
5	140515478	5:140515478:A:G	A	G	0.000334672	2988	ADD	4.47346	1.48396	8.87818	0.00288602	exonic	PCDHB5	.	synonymous_SNV	PCDHB5:NM_015669:exon1:c.A462G:p.L154L	0.0123	10.14
19	56953672	19:56953672:C:A	C	A	0.00016756	2984	ADD	4.77744	2.31359	8.87794	0.00288636	exonic	ZNF667	.	nonsynonymous_SNV	ZNF667:NM_022103:exon5:c.G692T:p.G231V,ZNF667:NM_001321355:exon6:c.G521T:p.G174V,ZNF667:NM_001321356:exon7:c.G692T:p.G231V	0	7.164
9	139718050	9:139718050:C:T	C	T	0.000335008	2985	ADD	4.34993	1.42821	8.87673	0.00288828	exonic	RABL6	.	synonymous_SNV	RABL6:NM_001173988:exon2:c.C204T:p.F68F,RABL6:NM_001173989:exon2:c.C204T:p.F68F,RABL6:NM_024718:exon2:c.C204T:p.F68F	0.0012	13.73
17	58725364	17:58725364:G:C	G	C	0.00016728	2989	ADD	4.77703	2.31307	8.87639	0.00288882	exonic	PPM1D	.	nonsynonymous_SNV	PPM1D:NM_003620:exon4:c.G938C:p.S313T	0.0003	23.9
17	19643712	17:19643712:C:G	C	G	0.000167392	2987	ADD	4.77702	2.31306	8.87636	0.00288888	exonic	ALDH3A1	.	nonsynonymous_SNV	ALDH3A1:NM_001135168:exon6:c.G886C:p.G296R,ALDH3A1:NM_001330150:exon6:c.G667C:p.G223R,ALDH3A1:NM_000691:exon7:c.G886C:p.G296R,ALDH3A1:NM_001135167:exon7:c.G886C:p.G296R	0	16.17
17	56274441	17:56274441:T:C	T	C	0.000167336	2988	ADD	4.77702	2.31306	8.87637	0.00288888	exonic	EPX	.	nonsynonymous_SNV	EPX:NM_000502:exon7:c.T943C:p.Y315H	8.951e-06	25
17	694967	17:694967:G:A	G	A	0.000167448	2986	ADD	4.77701	2.31305	8.87632	0.00288895	exonic	MRM3	.	stopgain	MRM3:NM_001317947:exon3:c.G333A:p.W111X,MRM3:NM_018146:exon4:c.G921A:p.W307X	5.956e-05	33
9	109773160	9:109773160:T:C	T	C	0.000335683	2979	ADD	4.7448	1.62024	8.87582	0.00288975	exonic	ZNF462	.	nonsynonymous_SNV	ZNF462:NM_001347997:exon13:c.T4775C:p.M1592T,ZNF462:NM_021224:exon13:c.T7370C:p.M2457T	0.0002	15.93
17	5436670	17:5436670:G:C	G	C	0.000167673	2982	ADD	4.77687	2.31297	8.87582	0.00288975	exonic	NLRP1	.	synonymous_SNV	NLRP1:NM_033006:exon9:c.C2997G:p.L999L,NLRP1:NM_033007:exon9:c.C2997G:p.L999L,NLRP1:NM_001033053:exon10:c.C3087G:p.L1029L,NLRP1:NM_014922:exon10:c.C3087G:p.L1029L,NLRP1:NM_033004:exon10:c.C3087G:p.L1029L	0	0.025
19	8564547	19:8564547:G:T	G	T	0.00016728	2989	ADD	4.77661	2.31311	8.87499	0.00289101	exonic	PRAM1	.	nonsynonymous_SNV	PRAM1:NM_032152:exon2:c.C145A:p.Q49K	0	14.62
19	4523612	19:4523612:G:T	G	T	0.000167392	2987	ADD	4.77659	2.3131	8.87492	0.00289115	exonic	PLIN5	.	nonsynonymous_SNV	PLIN5:NM_001013706:exon8:c.C1320A:p.D440E	1.833e-05	9.922
19	50918707	19:50918707:C:T	C	T	0.000167392	2987	ADD	4.77659	2.3131	8.87493	0.00289115	exonic	POLD1	.	synonymous_SNV	POLD1:NM_001308632:exon20:c.C2655T:p.G885G,POLD1:NM_001256849:exon21:c.C2577T:p.G859G,POLD1:NM_002691:exon21:c.C2577T:p.G859G	0.0178	0.816
19	6940042	19:6940042:G:C	G	C	0.000167336	2988	ADD	4.77658	2.31309	8.87488	0.00289121	UTR3	ADGRE1	NM_001256252:c.*2G>C\x3bNM_001256253:c.*2G>C\x3bNM_001974:c.*2G>C\x3bNM_001256255:c.*2G>C\x3bNM_001256254:c.*2G>C	.	.	8.984e-06	4.999
19	47883233	19:47883233:G:A	G	A	0.000167504	2985	ADD	4.77656	2.31308	8.87481	0.00289135	exonic	DHX34	.	synonymous_SNV	DHX34:NM_014681:exon14:c.G2973A:p.T991T	0.0001	2.187
19	33904518	19:33904518:C:T	C	T	0.000167673	2982	ADD	4.77654	2.31307	8.87472	0.00289148	exonic	PEPD	.	nonsynonymous_SNV	PEPD:NM_001166056:exon8:c.G580A:p.G194S,PEPD:NM_001166057:exon8:c.G511A:p.G171S,PEPD:NM_000285:exon10:c.G703A:p.G235S	8.657e-05	27.9
19	11546975	19:11546975:T:C	T	C	0.000167729	2981	ADD	4.77647	2.31303	8.8745	0.00289181	exonic	PRKCSH	.	nonsynonymous_SNV	PRKCSH:NM_001289102:exon1:c.T37C:p.W13R,PRKCSH:NM_001001329:exon2:c.T37C:p.W13R,PRKCSH:NM_001289103:exon2:c.T37C:p.W13R,PRKCSH:NM_001289104:exon2:c.T37C:p.W13R,PRKCSH:NM_002743:exon2:c.T37C:p.W13R	0.0027	16.29
6	30135009	6:30135009:T:A	T	A	0.00253036	2964	ADD	2.8016	0.718994	8.87411	0.00289241	exonic	TRIM15	.	nonsynonymous_SNV	TRIM15:NM_033229:exon2:c.T438A:p.D146E	0.0083	0.153
19	5610066	19:5610066:G:A	G	A	0.000167616	2983	ADD	4.77632	2.31294	8.87397	0.00289268	exonic	SAFB2	.	synonymous_SNV	SAFB2:NM_014649:exon9:c.C1236T:p.S412S	0.0019	8.659
16	11785747	16:11785747:G:C	G	C	0.0195914	2986	ADD	1.31994	0.381498	8.87386	0.00289281	exonic	TXNDC11	.	nonsynonymous_SNV	TXNDC11:NM_001324022:exon7:c.C657G:p.H219Q,TXNDC11:NM_015914:exon8:c.C1299G:p.H433Q,TXNDC11:NM_001303447:exon9:c.C1380G:p.H460Q	0.0162	21.6
9	134073257	9:134073257:C:T	C	T	0.000180701	2767	ADD	4.77532	2.30989	8.87211	0.00289561	exonic	NUP214	.	nonsynonymous_SNV	NUP214:NM_001318325:exon4:c.C854T:p.T285I,NUP214:NM_001318324:exon29:c.C4346T:p.T1449I,NUP214:NM_005085:exon29:c.C4376T:p.T1459I	0.0012	19.37
3	130852792	3:130852792:G:A	G	A	0.00133958	2986	ADD	2.9787	0.844894	8.87181	0.00289608	exonic	NEK11	.	synonymous_SNV	NEK11:NM_001321224:exon5:c.G195A:p.S65S,NEK11:NM_001146003:exon6:c.G639A:p.S213S,NEK11:NM_001321220:exon6:c.G639A:p.S213S,NEK11:NM_001321222:exon6:c.G639A:p.S213S,NEK11:NM_001321223:exon6:c.G639A:p.S213S,NEK11:NM_001353025:exon6:c.G636A:p.S212S,NEK11:NM_001353029:exon6:c.G639A:p.S213S,NEK11:NM_001353031:exon6:c.G639A:p.S213S,NEK11:NM_001353037:exon6:c.G639A:p.S213S,NEK11:NM_001353039:exon6:c.G195…	0.0032	5.321
3	74350618	3:74350618:C:G	C	G	0.00167448	2986	ADD	2.905	0.7992	8.86893	0.00290068	exonic	CNTN3	.	nonsynonymous_SNV	CNTN3:NM_020872:exon15:c.G2026C:p.V676L	0.0028	22.1
3	73111879	3:73111879:T:G	T	G	0.000335909	2977	ADD	4.95317	1.73689	8.86776	0.00290249	exonic	EBLN2	.	nonsynonymous_SNV	EBLN2:NM_018029:exon1:c.T647G:p.M216R	0.0674	16.31
14	92469886	14:92469886:T:C	T	C	0.000334784	2987	ADD	4.33798	1.42529	8.86366	0.00290904	exonic	TRIP11	.	synonymous_SNV	TRIP11:NM_001321851:exon11:c.A4431G:p.E1477E,TRIP11:NM_004239:exon11:c.A4434G:p.E1478E	6.536e-05	0.733
5	89769728	5:89769728:T:C	T	C	0.999656	2907	ADD	-4.46866	1.48344	8.86276	0.00291045	exonic	MBLAC2	.	nonsynonymous_SNV	MBLAC2:NM_203406:exon1:c.A382G:p.T128A	1	20.3
1	115428899	1:115428899:T:C	T	C	0.000513699	2920	ADD	4.25422	1.24189	8.86227	0.00291125	exonic	SYCP1	.	synonymous_SNV	SYCP1:NM_001282541:exon14:c.T1159C:p.L387L,SYCP1:NM_001282542:exon14:c.T1159C:p.L387L,SYCP1:NM_003176:exon14:c.T1159C:p.L387L	0.0005	5.814
23	63576149	X:63576149:G:A	G	A	0.000669792	2986	ADD	2.42771	1.03817	8.85997	0.00291494	exonic	MTMR8	.	nonsynonymous_SNV	MTMR8:NM_017677:exon3:c.C217T:p.R73C	0.001	NA
16	26147454	16:26147454:G:T	G	T	0.000335008	2985	ADD	4.32357	1.41985	8.85827	0.00291763	exonic	HS3ST4	.	nonsynonymous_SNV	HS3ST4:NM_006040:exon2:c.G1256T:p.R419L	0.1014	24.2
17	7850976	17:7850976:A:G	A	G	0.000334784	2987	ADD	4.68592	2.1735	8.85436	0.00292388	exonic	CNTROB	.	nonsynonymous_SNV	CNTROB:NM_001037144:exon14:c.A2081G:p.E694G,CNTROB:NM_001330124:exon14:c.A2081G:p.E694G,CNTROB:NM_001353202:exon14:c.A2081G:p.E694G,CNTROB:NM_001353205:exon14:c.A1814G:p.E605G,CNTROB:NM_053051:exon14:c.A2081G:p.E694G,CNTROB:NM_001353203:exon15:c.A2081G:p.E694G,CNTROB:NM_001353204:exon15:c.A1523G:p.E508G,CNTROB:NM_001353206:exon15:c.A2081G:p.E694G,CNTROB:NM_001353207:exon15:c.A2081G:p.E694G,CNTROB…	0.0099	22.9
4	15690001	4:15690001:ATTG:A	ATTG	A	0.000335008	2985	ADD	4.32147	1.42029	8.85003	0.00293083	exonic	FAM200B	.	nonframeshift_deletion	FAM200B:NM_001145191:exon2:c.1402_1404del:p.L469del	0.0009	15.24
23	107403778	X:107403778:C:T	C	T	0.000167392	2987	ADD	4.77122	2.31611	8.8499	0.00293103	exonic	COL4A6	.	synonymous_SNV	COL4A6:NM_001287760:exon41:c.G4269A:p.P1423P,COL4A6:NM_001287759:exon42:c.G4368A:p.P1456P,COL4A6:NM_001847:exon43:c.G4443A:p.P1481P,COL4A6:NM_033641:exon43:c.G4440A:p.P1480P,COL4A6:NM_001287758:exon44:c.G4491A:p.P1497P	0.0001	NA
16	83704505	16:83704505:C:T	C	T	0.00150804	2984	ADD	2.97556	0.836987	8.84983	0.00293116	exonic	CDH13	.	synonymous_SNV	CDH13:NM_001220489:exon8:c.C1095T:p.N365N,CDH13:NM_001220490:exon8:c.C450T:p.N150N,CDH13:NM_001257:exon9:c.C1212T:p.N404N,CDH13:NM_001220488:exon10:c.C1353T:p.N451N	0.0016	5.639
23	119565274	X:119565274:T:C	T	C	0.000167448	2986	ADD	4.77115	2.31607	8.84964	0.0029315	exonic	LAMP2	.	nonsynonymous_SNV	LAMP2:NM_002294:exon9:c.A1137G:p.I379M	0.0001	NA
3	69087804	3:69087804:G:A	G	A	0.00987282	2988	ADD	1.68931	0.474971	8.84453	0.00293968	exonic	TMF1	.	nonsynonymous_SNV	TMF1:NM_001363879:exon8:c.C2071T:p.R691C,TMF1:NM_007114:exon8:c.C2062T:p.R688C	0.0064	23.4
14	53558649	14:53558649:T:C	T	C	0.000336814	2969	ADD	4.32526	1.42242	8.84319	0.00294185	exonic	DDHD1	.	synonymous_SNV	DDHD1:NM_001160148:exon4:c.A1143G:p.A381A,DDHD1:NM_030637:exon4:c.A1143G:p.A381A,DDHD1:NM_001160147:exon5:c.A1164G:p.A388A	1.816e-05	7.336
12	26647094	12:26647094:G:A	G	A	0.000335458	2981	ADD	4.3587	1.43723	8.84266	0.00294266	exonic	ITPR2	.	stopgain	ITPR2:NM_002223:exon39:c.C5362T:p.Q1788X	0	39
19	8601430	19:8601430:G:A	G	A	0.00284662	2986	ADD	2.30482	0.644129	8.84173	0.00294422	exonic	MYO1F	.	synonymous_SNV	MYO1F:NM_001348355:exon18:c.C1839T:p.R613R,MYO1F:NM_012335:exon18:c.C1851T:p.R617R	0.0033	10.44
16	3639901	16:3639901:G:A	G	A	0.000336022	2976	ADD	4.35119	1.4343	8.84166	0.00294429	exonic	SLX4	.	synonymous_SNV	SLX4:NM_032444:exon12:c.C3738T:p.S1246S	0.0012	0.051
1	228475540	1:228475540:C:G	C	G	0.00033456	2989	ADD	4.30971	1.41602	8.8416	0.00294442	exonic	OBSCN	.	stopgain	OBSCN:NM_001098623:exon36:c.C9690G:p.Y3230X,OBSCN:NM_052843:exon36:c.C9690G:p.Y3230X,OBSCN:NM_001271223:exon41:c.C10977G:p.Y3659X	8.955e-06	33
3	69230592	3:69230592:T:G	T	G	0.0130522	2988	ADD	1.53134	0.436087	8.84086	0.00294557	exonic	FRMD4B	.	nonsynonymous_SNV	FRMD4B:NM_015123:exon21:c.A2309C:p.N770T	0.0397	12.98
8	144812665	8:144812665:G:A	G	A	0.000344234	2905	ADD	4.4292	1.46819	8.8403	0.00294652	exonic	FAM83H	.	synonymous_SNV	FAM83H:NM_198488:exon2:c.C88T:p.L30L	0.0066	9.755
11	9305051	11:9305051:T:C	T	C	0.000334784	2987	ADD	4.32848	1.42471	8.83998	0.002947	exonic	TMEM41B	.	nonsynonymous_SNV	TMEM41B:NM_015012:exon7:c.A796G:p.I266V	0.1988	15.42
22	19055665	22:19055665:G:A	G	A	0.000171644	2913	ADD	4.77241	2.31966	8.8398	0.00294734	exonic	DGCR2	.	synonymous_SNV	DGCR2:NM_001173533:exon2:c.C153T:p.G51G,DGCR2:NM_001173534:exon2:c.C153T:p.G51G,DGCR2:NM_001184781:exon3:c.C276T:p.G92G,DGCR2:NM_005137:exon3:c.C276T:p.G92G	3.633e-05	2.376
19	2138654	19:2138654:T:G	T	G	0.422065	2964	ADD	-0.530857	0.175848	8.8367	0.0029523	exonic	AP3D1	.	synonymous_SNV	AP3D1:NM_001261826:exon2:c.A156C:p.I52I,AP3D1:NM_003938:exon2:c.A156C:p.I52I	0.4331	10.77
14	94847246	14:94847246:G:A	G	A	0.000167336	2988	ADD	4.76632	2.31611	8.83581	0.00295379	exonic	SERPINA1	.	synonymous_SNV	SERPINA1:NM_000295:exon3:c.C879T:p.H293H,SERPINA1:NM_001002235:exon3:c.C879T:p.H293H,SERPINA1:NM_001127700:exon3:c.C879T:p.H293H,SERPINA1:NM_001127702:exon4:c.C879T:p.H293H,SERPINA1:NM_001127706:exon4:c.C879T:p.H293H,SERPINA1:NM_001127707:exon4:c.C879T:p.H293H,SERPINA1:NM_001002236:exon5:c.C879T:p.H293H,SERPINA1:NM_001127701:exon5:c.C879T:p.H293H,SERPINA1:NM_001127703:exon5:c.C879T:p.H293H,SERPIN…	9.746e-05	0.006
14	55636190	14:55636190:C:T	C	T	0.000167336	2988	ADD	4.7663	2.3161	8.83575	0.00295386	exonic	DLGAP5	.	nonsynonymous_SNV	DLGAP5:NM_001146015:exon12:c.G1475A:p.C492Y,DLGAP5:NM_014750:exon12:c.G1475A:p.C492Y	0.0002	23.6
14	62547922	14:62547922:A:G	A	G	0.000167448	2986	ADD	4.76628	2.31609	8.83568	0.002954	exonic	SYT16	.	nonsynonymous_SNV	SYT16:NM_001367654:exon4:c.A821G:p.Y274C,SYT16:NM_001367650:exon5:c.A446G:p.Y149C,SYT16:NM_001367652:exon5:c.A1034G:p.Y345C,SYT16:NM_001367657:exon5:c.A815G:p.Y272C,SYT16:NM_001367656:exon6:c.A1364G:p.Y455C,SYT16:NM_001367659:exon6:c.A1028G:p.Y343C,SYT16:NM_001367663:exon6:c.A1364G:p.Y455C,SYT16:NM_001367661:exon7:c.A1364G:p.Y455C	0.0001	22.6
14	39623478	14:39623478:G:A	G	A	0.000167842	2979	ADD	4.76614	2.31601	8.83517	0.00295481	exonic	TRAPPC6B	.	synonymous_SNV	TRAPPC6B:NM_001079537:exon4:c.C288T:p.D96D	5.799e-05	11.42
5	82786067	5:82786067:A:G	A	G	0.000502176	2987	ADD	4.20053	1.20632	8.83343	0.0029576	exonic	VCAN	.	nonsynonymous_SNV	VCAN:NM_001126336:exon3:c.A221G:p.N74S,VCAN:NM_001164097:exon3:c.A221G:p.N74S,VCAN:NM_001164098:exon3:c.A221G:p.N74S,VCAN:NM_004385:exon3:c.A221G:p.N74S	0.0003	0.002
7	129100173	7:129100173:T:G	T	G	0.00100402	2988	ADD	3.27031	1.06	8.83199	0.00295999	exonic	STRIP2	.	nonsynonymous_SNV	STRIP2:NM_001134336:exon13:c.T1436G:p.I479S,STRIP2:NM_020704:exon13:c.T1436G:p.I479S	0.0013	27.8
2	18113623	2:18113623:A:G	A	G	0.62588	2983	ADD	-0.507909	0.163782	8.83078	0.0029619	exonic	KCNS3	.	nonsynonymous_SNV	KCNS3:NM_001282428:exon3:c.A1348G:p.T450A,KCNS3:NM_002252:exon3:c.A1348G:p.T450A	0.9802	16.42
12	96676330	12:96676330:C:A	C	A	0.0998994	2983	ADD	-1.17469	0.433948	8.82983	0.00296347	exonic	CDK17	.	synonymous_SNV	CDK17:NM_001170464:exon15:c.G1413T:p.V471V,CDK17:NM_002595:exon15:c.G1413T:p.V471V	0.1805	9.44
4	159789500	4:159789500:C:T	C	T	0.000335796	2978	ADD	4.38232	1.4501	8.82913	0.00296463	exonic	FNIP2	.	nonsynonymous_SNV	FNIP2:NM_001346043:exon12:c.C650T:p.T217M,FNIP2:NM_001323916:exon13:c.C1781T:p.T594M,FNIP2:NM_020840:exon13:c.C1712T:p.T571M,FNIP2:NM_001366843:exon14:c.C1871T:p.T624M	5.387e-05	23.6
11	70200491	11:70200491:C:T	C	T	0.000335233	2983	ADD	4.32225	1.42398	8.82587	0.00296989	exonic	PPFIA1	.	nonsynonymous_SNV	PPFIA1:NM_003626:exon17:c.C2248T:p.R750W,PPFIA1:NM_177423:exon17:c.C2248T:p.R750W	0.0003	23.9
1	34666623	1:34666623:G:A	G	A	0.00033456	2989	ADD	4.34481	1.43385	8.82555	0.00297043	exonic	C1orf94	.	synonymous_SNV	C1orf94:NM_001134734:exon3:c.G1260A:p.P420P,C1orf94:NM_032884:exon3:c.G690A:p.P230P	0.0015	4.007
1	34662914	1:34662914:G:A	G	A	0.000334672	2988	ADD	4.34479	1.43385	8.82542	0.00297064	exonic	C1orf94	.	nonsynonymous_SNV	C1orf94:NM_001134734:exon2:c.G409A:p.V137I	0.0055	12.3
15	77329474	15:77329474:G:A	G	A	0.000334784	2987	ADD	4.88702	1.7045	8.82307	0.00297447	exonic	PSTPIP1	.	nonsynonymous_SNV	PSTPIP1:NM_001321135:exon14:c.G1151A:p.G384E,PSTPIP1:NM_003978:exon15:c.G1208A:p.G403E,PSTPIP1:NM_001321136:exon16:c.G1181A:p.G394E,PSTPIP1:NM_001321137:exon16:c.G1403A:p.G468E	0.0004	26.6
20	46264331	20:46264331:G:A	G	A	0.000502008	2988	ADD	4.22941	1.2223	8.82193	0.00297632	exonic	NCOA3	.	nonsynonymous_SNV	NCOA3:NM_001174087:exon11:c.G1378A:p.G460R,NCOA3:NM_001174088:exon11:c.G1408A:p.G470R,NCOA3:NM_006534:exon11:c.G1378A:p.G460R,NCOA3:NM_181659:exon11:c.G1378A:p.G460R	0.0026	24.4
15	43815819	15:43815819:G:A	G	A	0.00135593	2950	ADD	2.98843	0.840613	8.82138	0.00297721	exonic	MAP1A	.	synonymous_SNV	MAP1A:NM_002373:exon4:c.G2148A:p.S716S	0.0022	2.749
14	24040441	14:24040441:C:G	C	G	0.000167336	2988	ADD	4.75784	2.31316	8.8204	0.00297879	exonic	JPH4	.	nonsynonymous_SNV	JPH4:NM_001146028:exon5:c.G1499C:p.G500A,JPH4:NM_032452:exon6:c.G1499C:p.G500A	0.0001	21.8
4	8229024	4:8229024:G:A	G	A	0.000348068	2873	ADD	4.4091	1.4627	8.81998	0.00297948	exonic	SH3TC1	.	nonsynonymous_SNV	SH3TC1:NM_001318480:exon12:c.G1375A:p.D459N,SH3TC1:NM_018986:exon12:c.G1603A:p.D535N	0.0012	23.2
14	93761249	14:93761249:G:A	G	A	0.000167954	2977	ADD	4.76346	2.32023	8.81936	0.00298051	exonic	BTBD7	.	synonymous_SNV	BTBD7:NM_001002860:exon3:c.C117T:p.C39C,BTBD7:NM_018167:exon3:c.C117T:p.C39C	0.0001	10.21
14	71199742	14:71199742:C:T	C	T	0.000168862	2961	ADD	4.75744	2.31292	8.81894	0.00298119	exonic	MAP3K9	.	nonsynonymous_SNV	MAP3K9:NM_001284232:exon10:c.G1543A:p.E515K,MAP3K9:NM_001284230:exon11:c.G2344A:p.E782K,MAP3K9:NM_001284231:exon11:c.G1672A:p.E558K,MAP3K9:NM_033141:exon12:c.G2386A:p.E796K	0.0014	22.8
14	64457676	14:64457676:T:G	T	G	0.000167842	2979	ADD	4.76263	2.31974	8.81645	0.00298525	exonic	SYNE2	.	nonsynonymous_SNV	SYNE2:NM_015180:exon21:c.T2489G:p.L830R,SYNE2:NM_182914:exon21:c.T2489G:p.L830R	0	23.3
1	27101396	1:27101396:C:G	C	G	0.00033456	2989	ADD	4.30071	1.4163	8.81595	0.00298607	exonic	ARID1A	.	nonsynonymous_SNV	ARID1A:NM_006015:exon18:c.C4678G:p.P1560A	0.0002	18.4
2	31595177	2:31595177:G:A	G	A	0.000502008	2988	ADD	4.18886	1.20372	8.8153	0.00298717	exonic	XDH	.	synonymous_SNV	XDH:NM_000379:exon17:c.C1773T:p.A591A	0.0005	0.867
23	101909997	X:101909997:A:C	A	C	0.000340716	2935	ADD	4.71111	1.61169	8.81522	0.00298731	exonic	GPRASP1	.	nonsynonymous_SNV	GPRASP1:NM_001099411:exon3:c.A1156C:p.K386Q,GPRASP1:NM_001099410:exon4:c.A1156C:p.K386Q,GPRASP1:NM_014710:exon5:c.A1156C:p.K386Q,GPRASP1:NM_001184727:exon6:c.A1156C:p.K386Q	9.378e-05	NA
10	73587854	10:73587854:G:A	G	A	0.000334784	2987	ADD	4.3096	1.42092	8.8112	0.00299385	exonic	PSAP	.	nonsynonymous_SNV	PSAP:NM_001042465:exon6:c.C637T:p.R213W,PSAP:NM_001042466:exon6:c.C637T:p.R213W,PSAP:NM_002778:exon6:c.C637T:p.R213W	0.0007	25
6	110086303	6:110086303:C:A	C	A	0.000167392	2987	ADD	4.7541	2.31316	8.80963	0.00299647	exonic	FIG4	.	nonsynonymous_SNV	FIG4:NM_014845:exon14:c.C1522A:p.Q508K	0	28.4
6	16327741	6:16327741:G:A	G	A	0.000167504	2985	ADD	4.75406	2.31313	8.80949	0.00299668	exonic	ATXN1	.	synonymous_SNV	ATXN1:NM_001128164:exon7:c.C801T:p.P267P,ATXN1:NM_000332:exon8:c.C801T:p.P267P	0.0006	8.533
6	117248558	6:117248558:C:T	C	T	0.000167673	2982	ADD	4.75405	2.31313	8.80947	0.00299668	exonic	RFX6	.	nonsynonymous_SNV	RFX6:NM_173560:exon17:c.C2254T:p.R752W	0.0006	26.7
6	56347623	6:56347623:C:T	C	T	0.000167673	2982	ADD	4.75405	2.31313	8.80945	0.00299675	exonic	DST	.	nonsynonymous_SNV	DST:NM_015548:exon70:c.G13391A:p.R4464H,DST:NM_183380:exon80:c.G14369A:p.R4790H,DST:NM_001144770:exon81:c.G14489A:p.R4830H,DST:NM_001144769:exon83:c.G14903A:p.R4968H	0.0012	32
6	138584111	6:138584111:C:T	C	T	0.000167616	2983	ADD	4.75403	2.31312	8.80939	0.00299682	exonic	ARFGEF3	.	synonymous_SNV	ARFGEF3:NM_020340:exon12:c.C1491T:p.N497N	0.0002	0.069
6	138200286	6:138200286:G:T	G	T	0.000167673	2982	ADD	4.75402	2.31311	8.80936	0.00299688	exonic	TNFAIP3	.	synonymous_SNV	TNFAIP3:NM_001270507:exon7:c.G1704T:p.S568S,TNFAIP3:NM_001270508:exon7:c.G1704T:p.S568S,TNFAIP3:NM_006290:exon7:c.G1704T:p.S568S	0	0.043
14	88904221	14:88904221:T:C	T	C	0.000177368	2819	ADD	4.75477	2.31137	8.80919	0.00299716	exonic	SPATA7	.	synonymous_SNV	SPATA7:NM_001040428:exon11:c.T1159C:p.L387L,SPATA7:NM_018418:exon12:c.T1255C:p.L419L	0.0499	9.092
6	27925903	6:27925903:G:A	G	A	0.00016852	2967	ADD	4.75363	2.31288	8.80791	0.0029993	exonic	OR2B6	.	synonymous_SNV	OR2B6:NM_012367:exon1:c.G885A:p.K295K	0.0012	8.926
15	45398750	15:45398750:C:T	C	T	0.00636303	2986	ADD	1.93099	0.53973	8.80682	0.0030011	exonic	DUOX2	.	nonsynonymous_SNV	DUOX2:NM_001363711:exon16:c.G1921A:p.E641K,DUOX2:NM_014080:exon16:c.G1921A:p.E641K	0.0051	13.16
17	47109317	17:47109317:A:G	A	G	0.000167448	2986	ADD	4.75112	2.31455	8.80431	0.00300518	exonic	IGF2BP1	.	nonsynonymous_SNV	IGF2BP1:NM_001160423:exon5:c.A383G:p.N128S,IGF2BP1:NM_006546:exon5:c.A383G:p.N128S	0.0007	19.09
6	135748314	6:135748314:C:T	C	T	0.000176056	2840	ADD	4.75155	2.31167	8.80032	0.00301176	exonic	AHI1	.	nonsynonymous_SNV	AHI1:NM_001134830:exon18:c.G2755A:p.D919N,AHI1:NM_001134832:exon19:c.G2755A:p.D919N,AHI1:NM_017651:exon19:c.G2755A:p.D919N,AHI1:NM_001134831:exon20:c.G2755A:p.D919N,AHI1:NM_001350503:exon20:c.G2755A:p.D919N,AHI1:NM_001350504:exon20:c.G2755A:p.D919N	3.014e-05	29.4
23	14748509	X:14748509:A:G	A	G	0.00184008	2989	ADD	2.17427	0.598967	8.79984	0.00301259	exonic	GLRA2	.	nonsynonymous_SNV	GLRA2:NM_001118886:exon9:c.A1261G:p.I421V,GLRA2:NM_002063:exon9:c.A1261G:p.I421V,GLRA2:NM_001118885:exon10:c.A1261G:p.I421V,GLRA2:NM_001171942:exon11:c.A994G:p.I332V	0.0014	NA
3	124951827	3:124951827:G:A	G	A	0.0003367	2970	ADD	4.42927	1.47666	8.79593	0.00301905	exonic	ZNF148	.	synonymous_SNV	ZNF148:NM_001348426:exon8:c.C1743T:p.V581V,ZNF148:NM_001348431:exon8:c.C1743T:p.V581V,ZNF148:NM_001348434:exon8:c.C1617T:p.V539V,ZNF148:NM_001348428:exon9:c.C1743T:p.V581V,ZNF148:NM_001348430:exon9:c.C1743T:p.V581V,ZNF148:NM_001348432:exon9:c.C1743T:p.V581V,ZNF148:NM_001348433:exon9:c.C1743T:p.V581V,ZNF148:NM_021964:exon9:c.C1743T:p.V581V,ZNF148:NM_001348424:exon10:c.C1743T:p.V581V,ZNF148:NM_0013…	0.0024	10.15
17	3195783	17:3195783:CA:C	CA	C	0.000167448	2986	ADD	4.74864	2.31311	8.79553	0.00301967	exonic	OR3A1	.	frameshift_deletion	OR3A1:NM_002550:exon1:c.93delT:p.F31Lfs*55	8.976e-06	16.78
17	3195788	17:3195788:A:G	A	G	0.000167504	2985	ADD	4.74864	2.3131	8.79553	0.00301967	exonic	OR3A1	.	nonsynonymous_SNV	OR3A1:NM_002550:exon1:c.T89C:p.V30A	8.976e-06	16.24
17	19583313	17:19583313:C:T	C	T	0.000167448	2986	ADD	4.74864	2.31311	8.79556	0.00301967	exonic	SLC47A2	.	nonsynonymous_SNV	SLC47A2:NM_001099646:exon16:c.G1432A:p.E478K,SLC47A2:NM_152908:exon16:c.G1540A:p.E514K,SLC47A2:NM_001256663:exon17:c.G1474A:p.E492K	0	10.23
17	38928196	17:38928196:C:T	C	T	0.000167392	2987	ADD	4.74863	2.3131	8.79551	0.00301974	exonic	KRT26	.	nonsynonymous_SNV	KRT26:NM_181539:exon1:c.G170A:p.C57Y	0.0001	4.31
17	27064883	17:27064883:G:A	G	A	0.000167785	2980	ADD	4.74842	2.31298	8.79474	0.00302099	exonic	NEK8	.	synonymous_SNV	NEK8:NM_178170:exon7:c.G936A:p.S312S	0.0011	0.053
11	61907716	11:61907716:G:A	G	A	0.000335121	2984	ADD	4.45472	2.14284	8.79288	0.00302406	exonic	INCENP	.	synonymous_SNV	INCENP:NM_001040694:exon8:c.G1302A:p.T434T,INCENP:NM_020238:exon8:c.G1302A:p.T434T	0.1676	0.383
11	64418762	11:64418762:G:A	G	A	0.000334784	2987	ADD	4.3066	1.42229	8.7921	0.00302538	exonic	NRXN2	.	synonymous_SNV	NRXN2:NM_138732:exon12:c.C2763T:p.N921N,NRXN2:NM_015080:exon14:c.C2883T:p.N961N	0.0049	10.94
17	79095353	17:79095353:G:A	G	A	0.000170358	2935	ADD	4.74761	2.31251	8.79177	0.00302594	exonic	AATK	.	nonsynonymous_SNV	AATK:NM_004920:exon10:c.C2074T:p.P692S,AATK:NM_001080395:exon11:c.C2383T:p.P795S	0.0002	0.561
6	31753423	6:31753423:T:C	T	C	0.0127517	2980	ADD	1.46519	0.4294	8.79065	0.00302782	exonic	VARS	.	synonymous_SNV	VARS:NM_006295:exon9:c.A1188G:p.L396L	0.1221	10.65
4	2514238	4:2514238:C:T	C	T	0.00033456	2989	ADD	4.4047	1.46658	8.79006	0.00302873	exonic	RNF4	.	synonymous_SNV	RNF4:NM_002938:exon6:c.C288T:p.D96D,RNF4:NM_001185009:exon7:c.C288T:p.D96D	0.0002	9.505
5	147286053	5:147286053:T:G	T	G	0.000334784	2987	ADD	4.32942	1.43271	8.78781	0.00303249	exonic	C5orf46	.	synonymous_SNV	C5orf46:NM_206966:exon1:c.A12C:p.S4S	0.064	10.89
2	38804663	2:38804663:C:G	C	G	0.000335345	2982	ADD	4.43021	1.47859	8.78563	0.00303613	exonic	HNRNPLL	.	nonsynonymous_SNV	HNRNPLL:NM_138394:exon7:c.G814C:p.G272R,HNRNPLL:NM_001142650:exon8:c.G799C:p.G267R	0.0005	31
17	7919774	17:7919774:G:C	G	C	0.00017507	2856	ADD	4.74588	2.3115	8.78542	0.00303648	exonic	GUCY2D	.	nonsynonymous_SNV	GUCY2D:NM_000180:exon19:c.G3238C:p.G1080R	0.001	32
7	124404308	7:124404308:C:A	C	A	0.0112115	2988	ADD	1.68676	0.472435	8.77894	0.00304726	exonic	GPR37	.	synonymous_SNV	GPR37:NM_005302:exon1:c.G723T:p.T241T	0.0113	0.012
11	134029838	11:134029838:A:G	A	G	0.000334784	2987	ADD	4.28398	1.41544	8.77098	0.00306062	exonic	NCAPD3	.	synonymous_SNV	NCAPD3:NM_015261:exon29:c.T3816C:p.H1272H	1.791e-05	0.022
1	54661163	1:54661163:G:A	G	A	0.000335458	2981	ADD	5.37454	2.0069	8.76821	0.00306528	exonic	CYB5RL	.	stopgain	CYB5RL:NM_001031672:exon3:c.C127T:p.R43X,CYB5RL:NM_001353353:exon3:c.C127T:p.R43X,CYB5RL:NM_001353356:exon3:c.C127T:p.R43X	0.0009	39
1	11217240	1:11217240:G:A	G	A	0.00016728	2989	ADD	4.74518	2.31891	8.7681	0.00306542	exonic	MTOR	.	nonsynonymous_SNV	MTOR:NM_004958:exon30:c.C4438T:p.R1480C	5.885e-05	26.1
1	17942690	1:17942690:C:T	C	T	0.00016728	2989	ADD	4.74518	2.31891	8.7681	0.00306542	exonic	ARHGEF10L	.	synonymous_SNV	ARHGEF10L:NM_001011722:exon7:c.C711T:p.D237D,ARHGEF10L:NM_001319837:exon7:c.C711T:p.D237D,ARHGEF10L:NM_018125:exon9:c.C828T:p.D276D	0.0006	2.443
1	19513044	1:19513044:GTCC:G	GTCC	G	0.00016728	2989	ADD	4.74518	2.31891	8.7681	0.00306542	exonic	UBR4	.	nonframeshift_deletion	UBR4:NM_020765:exon14:c.1737_1739del:p.E579del	0	22.4
1	75072425	1:75072425:G:T	G	T	0.00016728	2989	ADD	4.74518	2.31891	8.7681	0.00306542	exonic	ERICH3	.	nonsynonymous_SNV	ERICH3:NM_001002912:exon10:c.C1349A:p.T450N	0.0151	5.499
1	89845985	1:89845985:G:A	G	A	0.00016728	2989	ADD	4.74518	2.31891	8.7681	0.00306542	exonic	GBP6	.	synonymous_SNV	GBP6:NM_001320257:exon4:c.G276A:p.E92E,GBP6:NM_198460:exon6:c.G666A:p.E222E	0.0294	0.416
1	94341903	1:94341903:C:G	C	G	0.00016728	2989	ADD	4.74518	2.31891	8.7681	0.00306542	exonic	DNTTIP2	.	nonsynonymous_SNV	DNTTIP2:NM_014597:exon2:c.G1588C:p.E530Q	0	23.6
1	152324937	1:152324937:G:T	G	T	0.00016728	2989	ADD	4.74518	2.31891	8.7681	0.00306542	exonic	FLG2	.	synonymous_SNV	FLG2:NM_001014342:exon3:c.C5325A:p.G1775G	0	0.009
1	154321504	1:154321504:C:T	C	T	0.00016728	2989	ADD	4.74518	2.31891	8.7681	0.00306542	exonic	ATP8B2	.	synonymous_SNV	ATP8B2:NM_001367934:exon27:c.C3540T:p.S1180S,ATP8B2:NM_001370596:exon28:c.C3486T:p.S1162S,ATP8B2:NM_001370597:exon28:c.C3483T:p.S1161S,ATP8B2:NM_020452:exon28:c.C3582T:p.S1194S	0.0002	9.451
1	228596052	1:228596052:T:A	T	A	0.000167336	2988	ADD	4.74516	2.3189	8.76801	0.00306556	exonic	TRIM17	.	nonsynonymous_SNV	TRIM17:NM_001024940:exon7:c.A1284T:p.E428D,TRIM17:NM_016102:exon7:c.A1284T:p.E428D	0.0003	7.67
1	78422374	1:78422374:T:C	T	C	0.000167336	2988	ADD	4.74515	2.31889	8.76799	0.00306563	exonic	FUBP1	.	nonsynonymous_SNV	FUBP1:NM_003902:exon17:c.A1588G:p.T530A,FUBP1:NM_001303433:exon18:c.A1651G:p.T551A	0.0165	16.78
1	6634990	1:6634990:C:T	C	T	0.000167392	2987	ADD	4.74514	2.31889	8.76797	0.0030657	exonic	TAS1R1	.	synonymous_SNV	TAS1R1:NM_138697:exon3:c.C798T:p.A266A	4.515e-05	0.411
1	150529717	1:150529717:G:A	G	A	0.000169895	2943	ADD	4.74517	2.3189	8.76791	0.00306577	exonic	ADAMTSL4	.	nonsynonymous_SNV	ADAMTSL4:NM_019032:exon12:c.G1953A:p.M651I,ADAMTSL4:NM_025008:exon12:c.G1953A:p.M651I,ADAMTSL4:NM_001288608:exon13:c.G2022A:p.M674I	6.691e-05	22.7
1	170511696	1:170511696:C:T	C	T	0.000167392	2987	ADD	4.74514	2.31888	8.76792	0.00306577	exonic	GORAB	.	nonsynonymous_SNV	GORAB:NM_001146039:exon3:c.C559T:p.R187C,GORAB:NM_152281:exon3:c.C559T:p.R187C,GORAB:NM_001320252:exon5:c.C19T:p.R7C	0.0002	28.8
1	26386767	1:26386767:C:T	C	T	0.000167616	2983	ADD	4.7451	2.31886	8.7678	0.00306598	exonic	TRIM63	.	nonsynonymous_SNV	TRIM63:NM_032588:exon4:c.G587A:p.R196Q	6.662e-05	22.8
1	53974882	1:53974882:C:A	C	A	0.00016756	2984	ADD	4.7451	2.31886	8.7678	0.00306598	exonic	GLIS1	.	nonsynonymous_SNV	GLIS1:NM_147193:exon9:c.G1616T:p.G539V,GLIS1:NM_001367484:exon10:c.G2141T:p.G714V	0.0002	10.44
1	59844505	1:59844505:G:A	G	A	0.000168464	2968	ADD	4.74487	2.31873	8.76695	0.0030674	exonic	FGGY	.	nonsynonymous_SNV	FGGY:NM_001244714:exon3:c.G286A:p.A96T,FGGY:NM_001350795:exon3:c.G286A:p.A96T,FGGY:NM_001350796:exon4:c.G214A:p.A72T,FGGY:NM_001350797:exon4:c.G148A:p.A50T,FGGY:NM_001350798:exon4:c.G214A:p.A72T,FGGY:NM_001350799:exon4:c.G214A:p.A72T,FGGY:NM_001113411:exon5:c.G550A:p.A184T,FGGY:NM_001350790:exon5:c.G550A:p.A184T,FGGY:NM_001350791:exon5:c.G550A:p.A184T,FGGY:NM_001350794:exon5:c.G550A:p.A184T,FGGY:…	7.173e-05	21
1	70504675	1:70504675:A:G	A	G	0.000169147	2956	ADD	4.7446	2.31857	8.76598	0.00306902	exonic	LRRC7	.	synonymous_SNV	LRRC7:NM_001350216:exon21:c.A3171G:p.Q1057Q,LRRC7:NM_001366838:exon21:c.A3168G:p.Q1056Q,LRRC7:NM_001370785:exon21:c.A3168G:p.Q1056Q,LRRC7:NM_001330635:exon22:c.A3069G:p.Q1023Q,LRRC7:NM_001366839:exon22:c.A3009G:p.Q1003Q,LRRC7:NM_001366841:exon22:c.A3069G:p.Q1023Q	0.001	0.013
6	13977537	6:13977537:G:A	G	A	0.000167392	2987	ADD	4.7424	2.31629	8.76596	0.00306902	exonic	RNF182	.	nonsynonymous_SNV	RNF182:NM_001165033:exon2:c.G187A:p.V63I,RNF182:NM_001165034:exon3:c.G187A:p.V63I,RNF182:NM_152737:exon3:c.G187A:p.V63I,RNF182:NM_001165032:exon4:c.G187A:p.V63I	0	18.86
6	33263971	6:33263971:C:G	C	G	0.000167448	2986	ADD	4.74239	2.31628	8.76592	0.00306909	exonic	RGL2	.	nonsynonymous_SNV	RGL2:NM_001243738:exon5:c.G356C:p.G119A,RGL2:NM_004761:exon6:c.G602C:p.G201A	0.002	17.47
6	34498307	6:34498307:C:T	C	T	0.000167504	2985	ADD	4.74238	2.31628	8.7659	0.00306916	exonic	PACSIN1	.	nonsynonymous_SNV	PACSIN1:NM_001199583:exon8:c.C980T:p.A327V,PACSIN1:NM_020804:exon8:c.C980T:p.A327V	6.676e-05	15.19
6	146214416	6:146214416:C:T	C	T	0.000167898	2978	ADD	4.74211	2.31612	8.76488	0.00307086	exonic	SHPRH	.	synonymous_SNV	SHPRH:NM_001042683:exon28:c.G4809A:p.E1603E,SHPRH:NM_001370327:exon28:c.G4809A:p.E1603E,SHPRH:NM_173082:exon28:c.G4821A:p.E1607E,SHPRH:NM_001370328:exon30:c.G3366A:p.E1122E	0.0001	10.95
1	198687230	1:198687230:C:G	C	G	0.000171233	2920	ADD	4.74414	2.3183	8.7643	0.00307185	exonic	PTPRC	.	nonsynonymous_SNV	PTPRC:NM_080921:exon11:c.C975G:p.S325R,PTPRC:NM_002838:exon14:c.C1458G:p.S486R	6.667e-05	13.48
6	46978013	6:46978013:T:C	T	C	0.000169952	2942	ADD	4.74173	2.3159	8.7635	0.00307319	exonic	ADGRF1	.	synonymous_SNV	ADGRF1:NM_153840:exon11:c.A1158G:p.S386S	0.0002	1.048
8	103573010	8:103573010:CTGCAACCCCTGCAGCCCCTGCAACCCG:C	CTGCAACCCCTGCAGCCCCTGCAACCCG	C	0.247902	2860	ADD	0.554051	0.176296	8.76226	0.00307525	exonic	ODF1	.	nonframeshift_deletion	ODF1:NM_024410:exon2:c.652_678del:p.N219_C227del	0.382	15.93
7	135286179	7:135286179:G:A	G	A	0.00134409	2976	ADD	2.9626	0.864809	8.76061	0.00307808	exonic	NUP205	.	synonymous_SNV	NUP205:NM_001329434:exon17:c.G1362A:p.E454E,NUP205:NM_015135:exon17:c.G2436A:p.E812E	0.0012	11.44
[truncated: 2,737 more rows]
